# Supplementary material for: Identification of SNPs potentially related to immune responses and growth performance in Litopenaeus vannamei by RNA-seq analyses
Source: PeerJ. 2018 Jul 4;6:e5154. doi: 10.7717/peerj.5154 (PMC6035726; doi:10.7717/peerj.5154)
Supplement: Table S1 — SNPs unique to samples from animals evaluated for rapid growth and exposed to WSSV. Also shown is the number of loci with SNPs for each condition and the number of SNPs/unigene. POS (SNP position in base pairs), REF (allele identified in the reference assembled) and ALT (Alternative allele found in reads mapped). [file peerj-06-5154-s001.xlsx]

## Sheet: ALL SNP HIGH
#Unigene	POS	REF	ALT	Loco_id
10000	883	C	G	Locus_27720.0|BlastHit|gi|68067543|sp|P07192.2|MAL3_DROME
10000	958	T	C	Locus_27720.0|BlastHit|gi|68067543|sp|P07192.2|MAL3_DROME
10012	546	A	G	Locus_27731.0|BlastHit|gi|82182166|sp|Q6DC58.1|TM223_DANRE
10024	435	C	T	Locus_27746.0|BlastHit|gi|78103352|sp|Q9CQ56.1|USE1_MOUSE
10028	750	C	G	Locus_27751.0|BlastHit|gi|121717|sp|P04905.2|GSTM1_RAT
10030	247	T	A	Locus_27753.0|BlastHit|gi|56404954|sp|Q9CQS5.1|RIOK2_MOUSE
10030	466	G	A	Locus_27753.0|BlastHit|gi|56404954|sp|Q9CQS5.1|RIOK2_MOUSE
10037	194	C	T	Locus_27762.0|BlastHit|gi|14916936|sp|Q9HYH5.1|Y3430_PSEAE
10037	639	G	C	Locus_27762.0|BlastHit|gi|14916936|sp|Q9HYH5.1|Y3430_PSEAE
10037	753	G	C	Locus_27762.0|BlastHit|gi|14916936|sp|Q9HYH5.1|Y3430_PSEAE
10038	1326	C	T	Locus_27764.0|BlastHit|gi|21541962|sp|Q9QZU7.1|BODG_RAT
10059	1658	T	A	Locus_27767.0|BlastHit|gi|1346566|sp|P47811.3|MK14_MOUSE
10059	42	T	A	Locus_27767.0|BlastHit|gi|1346566|sp|P47811.3|MK14_MOUSE
10061	2043	C	T	Locus_27771.0|BlastHit|gi|74947746|sp|Q9VCC0.1|CHRD1_DROME
10061	748	A	T	Locus_27771.0|BlastHit|gi|74947746|sp|Q9VCC0.1|CHRD1_DROME
10062	175	G	A,C	Locus_27772.0|BlastHit|gi|123928|sp|P07687.1|HYEP_RAT
10062	340	C	G	Locus_27772.0|BlastHit|gi|123928|sp|P07687.1|HYEP_RAT
10062	535	G	A	Locus_27772.0|BlastHit|gi|123928|sp|P07687.1|HYEP_RAT
10077	528	T	A	Locus_27783.0|BlastHit|gi|20139021|sp|Q91642.1|PEPE_XENLA
10077	838	A	T	Locus_27783.0|BlastHit|gi|20139021|sp|Q91642.1|PEPE_XENLA
10086	790	C	T	Locus_27795.0|BlastHit|gi|74866454|sp|Q95SS8.1|TMM70_DROME
10114	1681	T	C	Locus_27819.0|BlastHit|gi|81906067|sp|Q9DB60.1|PGFS_MOUSE
10114	187	A	C	Locus_27819.0|BlastHit|gi|81906067|sp|Q9DB60.1|PGFS_MOUSE
10114	296	A	T	Locus_27819.0|BlastHit|gi|81906067|sp|Q9DB60.1|PGFS_MOUSE
10114	341	T	C	Locus_27819.0|BlastHit|gi|81906067|sp|Q9DB60.1|PGFS_MOUSE
10114	401	G	A	Locus_27819.0|BlastHit|gi|81906067|sp|Q9DB60.1|PGFS_MOUSE
10114	823	C	T	Locus_27819.0|BlastHit|gi|81906067|sp|Q9DB60.1|PGFS_MOUSE
10114	949	A	T	Locus_27819.0|BlastHit|gi|81906067|sp|Q9DB60.1|PGFS_MOUSE
10123	1090	C	T	Locus_27823.0|BlastHit|gi|122143481|sp|Q0VCA9.1|TMED6_BOVIN
10123	1364	T	A	Locus_27823.0|BlastHit|gi|122143481|sp|Q0VCA9.1|TMED6_BOVIN
10123	1468	A	T	Locus_27823.0|BlastHit|gi|122143481|sp|Q0VCA9.1|TMED6_BOVIN
10123	598	T	G	Locus_27823.0|BlastHit|gi|122143481|sp|Q0VCA9.1|TMED6_BOVIN
10123	667	G	A	Locus_27823.0|BlastHit|gi|122143481|sp|Q0VCA9.1|TMED6_BOVIN
10123	872	T	C	Locus_27823.0|BlastHit|gi|122143481|sp|Q0VCA9.1|TMED6_BOVIN
10147	814	T	C	Locus_27838.0|BlastHit|gi|3182992|sp|P79345.1|NPC2_BOVIN
10169	1635	G	T	Locus_27866.1|BlastHit|gi|28380062|sp|Q9VXK6.1|IF5_DROME
10173	395	C	A	Locus_27870.0|BlastHit|gi|74942758|sp|Q9I7S8.2|PUR6_DROME
10173	398	C	T	Locus_27870.0|BlastHit|gi|74942758|sp|Q9I7S8.2|PUR6_DROME
10173	932	T	G	Locus_27870.0|BlastHit|gi|74942758|sp|Q9I7S8.2|PUR6_DROME
10183	3166	G	A	Locus_27885.0|BlastHit|gi|93141310|sp|Q12981.3|SEC20_HUMAN
10190	4857	A	G	Locus_27888.0|BlastHit|gi|342187160|sp|Q6P5E4.4|UGGG1_MOUSE
10209	1431	C	T	Locus_27909.0|BlastHit|gi|122140235|sp|Q3SZJ4.1|PTGR1_BOVIN
10209	1468	T	A	Locus_27909.0|BlastHit|gi|122140235|sp|Q3SZJ4.1|PTGR1_BOVIN
10213	505	C	T	Locus_27912.0|BlastHit|gi|464320|sp|P34714.1|SPRC_CAEEL
10222	1205	G	A	Locus_27923.0|BlastHit|gi|20141376|sp|P40939.2|ECHA_HUMAN
10222	369	G	A	Locus_27923.0|BlastHit|gi|20141376|sp|P40939.2|ECHA_HUMAN
10222	469	A	T	Locus_27923.0|BlastHit|gi|20141376|sp|P40939.2|ECHA_HUMAN
10222	571	C	T	Locus_27923.0|BlastHit|gi|20141376|sp|P40939.2|ECHA_HUMAN
10222	857	G	T	Locus_27923.0|BlastHit|gi|20141376|sp|P40939.2|ECHA_HUMAN
10230	1135	G	A	Locus_27929.0|BlastHit|gi|110278902|sp|Q99MB4.2|CBWD1_RAT
10230	253	T	A	Locus_27929.0|BlastHit|gi|110278902|sp|Q99MB4.2|CBWD1_RAT
10235	1689	C	T	Locus_27932.0|BlastHit|gi|84029495|sp|Q6ZPY2.2|SMG5_MOUSE
10235	2875	C	A	Locus_27932.0|BlastHit|gi|84029495|sp|Q6ZPY2.2|SMG5_MOUSE
10235	3645	A	G	Locus_27932.0|BlastHit|gi|84029495|sp|Q6ZPY2.2|SMG5_MOUSE
10236	2231	T	G	Locus_27937.0|BlastHit|gi|166899092|sp|P55859.3|PNPH_BOVIN
10236	2428	C	T	Locus_27937.0|BlastHit|gi|166899092|sp|P55859.3|PNPH_BOVIN
10248	1257	A	T	Locus_27952.0|BlastHit|gi|82188244|sp|Q7T3C6.1|CPSF5_DANRE
10254	856	G	A	Locus_27960.0|BlastHit|gi|74748828|sp|Q6IQ49.1|CA055_HUMAN
10259	706	C	T	Locus_27965.0|BlastHit|gi|122140411|sp|Q3T0V9.1|DEOC_BOVIN
10261	182	T	A	Locus_27968.0|BlastHit|gi|21362539|sp|Q9V9Z9.1|EBP2_DROME
10261	278	C	T	Locus_27968.0|BlastHit|gi|21362539|sp|Q9V9Z9.1|EBP2_DROME
10261	434	G	A	Locus_27968.0|BlastHit|gi|21362539|sp|Q9V9Z9.1|EBP2_DROME
10261	647	A	G	Locus_27968.0|BlastHit|gi|21362539|sp|Q9V9Z9.1|EBP2_DROME
10290	333	A	C	Locus_27989.0|BlastHit|gi|34223744|sp|Q9VCR7.2|CTNS_DROME
10311	1085	A	G	Locus_28021.0|BlastHit|gi|51316507|sp|Q924Z4.1|CERS2_MOUSE
10311	965	T	C	Locus_28021.0|BlastHit|gi|51316507|sp|Q924Z4.1|CERS2_MOUSE
10311	980	C	G	Locus_28021.0|BlastHit|gi|51316507|sp|Q924Z4.1|CERS2_MOUSE
10316	1932	G	T	Locus_28027.0|BlastHit|gi|29839592|sp|Q90673.1|PRLD1_CHICK
10316	2031	C	T	Locus_28027.0|BlastHit|gi|29839592|sp|Q90673.1|PRLD1_CHICK
10316	2823	G	A	Locus_28027.0|BlastHit|gi|29839592|sp|Q90673.1|PRLD1_CHICK
10316	2888	T	C	Locus_28027.0|BlastHit|gi|29839592|sp|Q90673.1|PRLD1_CHICK
10316	3008	T	C	Locus_28027.0|BlastHit|gi|29839592|sp|Q90673.1|PRLD1_CHICK
10316	3010	C	T	Locus_28027.0|BlastHit|gi|29839592|sp|Q90673.1|PRLD1_CHICK
10316	3308	A	G	Locus_28027.0|BlastHit|gi|29839592|sp|Q90673.1|PRLD1_CHICK
10316	3514	A	C	Locus_28027.0|BlastHit|gi|29839592|sp|Q90673.1|PRLD1_CHICK
10316	3528	A	G	Locus_28027.0|BlastHit|gi|29839592|sp|Q90673.1|PRLD1_CHICK
10316	638	C	T	Locus_28027.0|BlastHit|gi|29839592|sp|Q90673.1|PRLD1_CHICK
10319	118	G	C	Locus_28032.0|BlastHit|gi|62901525|sp|Q94900.2|GLUCL_DROME
10319	339	C	A	Locus_28032.0|BlastHit|gi|62901525|sp|Q94900.2|GLUCL_DROME
10319	363	C	T	Locus_28032.0|BlastHit|gi|62901525|sp|Q94900.2|GLUCL_DROME
10319	996	G	A	Locus_28032.0|BlastHit|gi|62901525|sp|Q94900.2|GLUCL_DROME
10326	805	C	T	Locus_28040.0|BlastHit|gi|57015283|sp|O55102.2|BL1S1_MOUSE
1034	172	G	A	Locus_7668.0|BlastHit|gi|46396971|sp|Q8VE62.1|PAIP1_MOUSE
10355	168	C	A	Locus_28042.0|BlastHit|gi|85701141|sp|Q3THS6.2|METK2_MOUSE
10355	2419	G	A	Locus_28042.0|BlastHit|gi|85701141|sp|Q3THS6.2|METK2_MOUSE
10355	38	T	C	Locus_28042.0|BlastHit|gi|85701141|sp|Q3THS6.2|METK2_MOUSE
10355	614	G	A	Locus_28042.0|BlastHit|gi|85701141|sp|Q3THS6.2|METK2_MOUSE
10367	1949	A	C	Locus_28053.0|BlastHit|gi|6136677|sp|O02485.1|YDJ1_CAEEL
10376	1115	C	T	Locus_28064.0|BlastHit|gi|57014080|sp|Q80UN9.2|MOD5_MOUSE
10376	455	G	A	Locus_28064.0|BlastHit|gi|57014080|sp|Q80UN9.2|MOD5_MOUSE
1037	31	T	A,C	Locus_7671.0|BlastHit|gi|113228|sp|P04751.1|ACTC_XENLA
1037	453	G	A	Locus_7671.0|BlastHit|gi|113228|sp|P04751.1|ACTC_XENLA
10380	724	T	C	Locus_28067.1|BlastHit|gi|82192994|sp|Q52L45.1|ILEU_XENLA
10380	846	A	G	Locus_28067.1|BlastHit|gi|82192994|sp|Q52L45.1|ILEU_XENLA
10381	1006	G	A	Locus_28067.1|BlastHit|gi|82195170|sp|Q5I0S8.1|ILEU_XENTR
10381	1009	T	C	Locus_28067.1|BlastHit|gi|82195170|sp|Q5I0S8.1|ILEU_XENTR
10415	2897	T	C	Locus_28094.0|BlastHit|gi|13124102|sp|Q9VA73.1|CMC_DROME
10446	100	C	T	Locus_28125.0|BlastHit|gi|121328|sp|P13255.2|GNMT_RAT
10446	421	C	T	Locus_28125.0|BlastHit|gi|121328|sp|P13255.2|GNMT_RAT
10456	1004	A	G	Locus_28133.1|BlastHit|gi|190359360|sp|Q4AEH7.2|GPX2_CEBAP
10456	1191	T	A	Locus_28133.1|BlastHit|gi|190359360|sp|Q4AEH7.2|GPX2_CEBAP
10456	788	A	T	Locus_28133.1|BlastHit|gi|190359360|sp|Q4AEH7.2|GPX2_CEBAP
10456	885	A	C	Locus_28133.1|BlastHit|gi|190359360|sp|Q4AEH7.2|GPX2_CEBAP
10468	1796	T	C	Locus_28148.0|BlastHit|gi|160332368|sp|Q7YU81.3|CHN_DROME
10468	215	T	A	Locus_28148.0|BlastHit|gi|160332368|sp|Q7YU81.3|CHN_DROME
10488	921	T	G	Locus_28154.0|BlastHit|gi|20139238|sp|Q9NY93.1|DDX56_HUMAN
10491	1232	G	A	Locus_28159.0|BlastHit|gi|166219770|sp|P0C606.1|SGF29_RAT
10494	829	A	G	Locus_28163.0|BlastHit|gi|85542049|sp|Q96RW7.2|HMCN1_HUMAN
10495	1785	C	T	Locus_28164.0|BlastHit|gi|33302633|sp|Q9VLS1.2|KPBB_DROME
10495	185	C	T	Locus_28164.0|BlastHit|gi|33302633|sp|Q9VLS1.2|KPBB_DROME
10500	1305	C	A	Locus_28168.0|BlastHit|gi|108860896|sp|Q3T0W4.1|PP1R7_BOVIN
10502	994	T	C	Locus_28170.0|BlastHit|gi|729072|sp|P80363.1|CCB23_ORCLI
10514	179	A	G	Locus_28183.0|BlastHit|gi|75042696|sp|Q5RFT1.1|CB018_PONAB
10517	864	A	T	Locus_28185.0|BlastHit|gi|121949074|sp|Q496Y0.1|LONF3_HUMAN
1052	387	G	A	Locus_7768.0|BlastHit|gi|14286156|sp|P50882.2|RL9_DROME
1052	390	A	G	Locus_7768.0|BlastHit|gi|14286156|sp|P50882.2|RL9_DROME
1052	456	T	C	Locus_7768.0|BlastHit|gi|14286156|sp|P50882.2|RL9_DROME
10532	1055	G	C	Locus_28199.0|BlastHit|gi|134053|sp|P10735.1|RT12_DROME
10532	403	G	A	Locus_28199.0|BlastHit|gi|134053|sp|P10735.1|RT12_DROME
10552	347	A	G	Locus_28216.0|BlastHit|gi|145559525|sp|P82925.3|RT31_BOVIN
10553	454	C	T	Locus_28219.0|BlastHit|gi|68565023|sp|Q5RBM6.1|BUP1_PONAB
10554	1415	G	A	Locus_28221.0|BlastHit|gi|118572819|sp|Q2KJI7.1|AFG32_BOVIN
10563	1176	C	T	Locus_28229.0|BlastHit|gi|21542476|sp|P34298.2|DUOXA_CAEEL
10564	1243	G	A	Locus_28231.0|BlastHit|gi|108860959|sp|Q2KID9.1|RT05_BOVIN
10564	631	T	A	Locus_28231.0|BlastHit|gi|108860959|sp|Q2KID9.1|RT05_BOVIN
10564	898	C	A	Locus_28231.0|BlastHit|gi|108860959|sp|Q2KID9.1|RT05_BOVIN
10566	4977	C	T	Locus_28236.0|BlastHit|gi|166225158|sp|A2BGA0.1|RFX4_DANRE
10580	2012	G	A	Locus_28246.0|BlastHit|gi|122145942|sp|Q2F7Z7.1|TMM59_PIG
10580	2092	G	A	Locus_28246.0|BlastHit|gi|122145942|sp|Q2F7Z7.1|TMM59_PIG
10580	2229	G	T	Locus_28246.0|BlastHit|gi|122145942|sp|Q2F7Z7.1|TMM59_PIG
10580	2257	G	A	Locus_28246.0|BlastHit|gi|122145942|sp|Q2F7Z7.1|TMM59_PIG
10580	367	C	T	Locus_28246.0|BlastHit|gi|122145942|sp|Q2F7Z7.1|TMM59_PIG
10580	875	A	G	Locus_28246.0|BlastHit|gi|122145942|sp|Q2F7Z7.1|TMM59_PIG
10580	932	T	C	Locus_28246.0|BlastHit|gi|122145942|sp|Q2F7Z7.1|TMM59_PIG
10582	546	C	T	Locus_28248.0|BlastHit|gi|115502344|sp|Q0MQG7.1|NDUS3_GORGO
1058	404	G	A	Locus_7789.0|BlastHit|gi|14286121|sp|O18640.2|GBLP_DROME
10595	652	A	G	Locus_28265.0|BlastHit|gi|1172740|sp|P42556.1|PTR1_LEITA
10602	1775	A	G	Locus_28269.0|BlastHit|gi|110825795|sp|P07031.2|ACYP2_CHICK
10602	182	G	A	Locus_28269.0|BlastHit|gi|110825795|sp|P07031.2|ACYP2_CHICK
10602	2793	A	G	Locus_28269.0|BlastHit|gi|110825795|sp|P07031.2|ACYP2_CHICK
10602	308	C	T	Locus_28269.0|BlastHit|gi|110825795|sp|P07031.2|ACYP2_CHICK
10602	900	G	A	Locus_28269.0|BlastHit|gi|110825795|sp|P07031.2|ACYP2_CHICK
10604	1486	T	C	Locus_28272.0|BlastHit|gi|74897764|sp|Q56R10.1|ASTA_PENMO
10604	333	C	T	Locus_28272.0|BlastHit|gi|74897764|sp|Q56R10.1|ASTA_PENMO
10604	367	T	A	Locus_28272.0|BlastHit|gi|74897764|sp|Q56R10.1|ASTA_PENMO
10604	470	C	T	Locus_28272.0|BlastHit|gi|74897764|sp|Q56R10.1|ASTA_PENMO
10604	475	T	A	Locus_28272.0|BlastHit|gi|74897764|sp|Q56R10.1|ASTA_PENMO
10604	487	A	G	Locus_28272.0|BlastHit|gi|74897764|sp|Q56R10.1|ASTA_PENMO
10604	554	C	T	Locus_28272.0|BlastHit|gi|74897764|sp|Q56R10.1|ASTA_PENMO
10604	569	A	G	Locus_28272.0|BlastHit|gi|74897764|sp|Q56R10.1|ASTA_PENMO
10604	663	G	A	Locus_28272.0|BlastHit|gi|74897764|sp|Q56R10.1|ASTA_PENMO
10604	947	A	G	Locus_28272.0|BlastHit|gi|74897764|sp|Q56R10.1|ASTA_PENMO
10606	1176	C	A	Locus_28281.0|BlastHit|gi|6685412|sp|O76767.1|ERD2_DROME
10606	2363	T	C	Locus_28281.0|BlastHit|gi|6685412|sp|O76767.1|ERD2_DROME
10606	2454	G	C	Locus_28281.0|BlastHit|gi|6685412|sp|O76767.1|ERD2_DROME
10606	534	T	C	Locus_28281.0|BlastHit|gi|6685412|sp|O76767.1|ERD2_DROME
10606	606	C	T	Locus_28281.0|BlastHit|gi|6685412|sp|O76767.1|ERD2_DROME
10612	1623	G	T	Locus_28287.0|BlastHit|gi|313118235|sp|B2D0J5.1|EST6_APIME
10612	1779	G	A	Locus_28287.0|BlastHit|gi|313118235|sp|B2D0J5.1|EST6_APIME
10613	4658	T	C	Locus_28288.0|BlastHit|gi|76803554|sp|Q13206.2|DDX10_HUMAN
10624	311	G	T	Locus_28296.0|BlastHit|gi|5915892|sp|P81589.1|CUC11_CANPG
10624	612	G	A	Locus_28296.0|BlastHit|gi|5915892|sp|P81589.1|CUC11_CANPG
10634	612	C	T	Locus_28306.0|BlastHit|gi|127717|sp|P29218.1|IMPA1_HUMAN
10635	1050	A	G,T	Locus_28307.0|BlastHit|gi|47116230|sp|Q91Z53.1|GRHPR_MOUSE
10635	44	G	A,C	Locus_28307.0|BlastHit|gi|47116230|sp|Q91Z53.1|GRHPR_MOUSE
10635	56	C	T	Locus_28307.0|BlastHit|gi|47116230|sp|Q91Z53.1|GRHPR_MOUSE
10636	1001	A	G	Locus_28308.0|BlastHit|gi|6685712|sp|O60733.2|PA2G6_HUMAN
10641	1278	C	T	Locus_28311.0|BlastHit|gi|259016214|sp|Q6PEE2.2|CTIF_MOUSE
10641	1290	C	T	Locus_28311.0|BlastHit|gi|259016214|sp|Q6PEE2.2|CTIF_MOUSE
10641	1622	C	T	Locus_28311.0|BlastHit|gi|259016214|sp|Q6PEE2.2|CTIF_MOUSE
10642	592	G	A	Locus_28314.0|BlastHit|gi|81911277|sp|Q6P5P3.1|TTC9C_RAT
10642	745	A	G	Locus_28314.0|BlastHit|gi|81911277|sp|Q6P5P3.1|TTC9C_RAT
10644	2973	C	T	Locus_28318.0|BlastHit|gi|82249463|sp|Q4QRJ7.1|EIF2A_DANRE
10644	851	A	G	Locus_28318.0|BlastHit|gi|82249463|sp|Q4QRJ7.1|EIF2A_DANRE
10647	437	C	T	Locus_28323.0|BlastHit|gi|75041803|sp|Q5R9Y3.1|ABT1_PONAB
10647	713	G	A	Locus_28323.0|BlastHit|gi|75041803|sp|Q5R9Y3.1|ABT1_PONAB
10647	767	C	G	Locus_28323.0|BlastHit|gi|75041803|sp|Q5R9Y3.1|ABT1_PONAB
10657	897	A	G	Locus_28338.0|BlastHit|gi|75024694|sp|Q9TXJ0.1|CMK1_CAEEL
10665	1606	G	A	Locus_28349.0|BlastHit|gi|81914299|sp|Q8CDF7.1|EXD1_MOUSE
10665	1845	T	G	Locus_28349.0|BlastHit|gi|81914299|sp|Q8CDF7.1|EXD1_MOUSE
10665	2142	G	A	Locus_28349.0|BlastHit|gi|81914299|sp|Q8CDF7.1|EXD1_MOUSE
10672	2816	A	G	Locus_28358.0|BlastHit|gi|82237116|sp|Q6NRH1.1|DCAF8_XENLA
10672	586	T	C	Locus_28358.0|BlastHit|gi|82237116|sp|Q6NRH1.1|DCAF8_XENLA
10674	1841	T	C	Locus_28361.0|BlastHit|gi|74753513|sp|Q9Y5Z4.1|HEBP2_HUMAN
10675	1038	A	G	Locus_28365.0|BlastHit|gi|73622220|sp|Q5FW48.1|ASPD_XENTR
10675	1056	T	C	Locus_28365.0|BlastHit|gi|73622220|sp|Q5FW48.1|ASPD_XENTR
10675	966	C	A	Locus_28365.0|BlastHit|gi|73622220|sp|Q5FW48.1|ASPD_XENTR
10680	1051	G	A	Locus_28371.0|BlastHit|gi|122140334|sp|Q3T062.1|RRP15_BOVIN
10680	1168	A	C	Locus_28371.0|BlastHit|gi|122140334|sp|Q3T062.1|RRP15_BOVIN
10680	1204	C	T	Locus_28371.0|BlastHit|gi|122140334|sp|Q3T062.1|RRP15_BOVIN
10680	670	C	T	Locus_28371.0|BlastHit|gi|122140334|sp|Q3T062.1|RRP15_BOVIN
10690	1231	A	G	Locus_28381.0|BlastHit|gi|30580455|sp|Q9D0T2.1|DUS12_MOUSE
10690	1306	G	A	Locus_28381.0|BlastHit|gi|30580455|sp|Q9D0T2.1|DUS12_MOUSE
10690	1549	A	G	Locus_28381.0|BlastHit|gi|30580455|sp|Q9D0T2.1|DUS12_MOUSE
10694	1643	A	G	Locus_28386.0|BlastHit|gi|55584180|sp|Q61753.3|SERA_MOUSE
10694	205	T	C	Locus_28386.0|BlastHit|gi|55584180|sp|Q61753.3|SERA_MOUSE
10694	2050	C	T	Locus_28386.0|BlastHit|gi|55584180|sp|Q61753.3|SERA_MOUSE
10694	616	G	T	Locus_28386.0|BlastHit|gi|55584180|sp|Q61753.3|SERA_MOUSE
10694	955	T	C	Locus_28386.0|BlastHit|gi|55584180|sp|Q61753.3|SERA_MOUSE
10694	958	A	G	Locus_28386.0|BlastHit|gi|55584180|sp|Q61753.3|SERA_MOUSE
10694	963	G	C	Locus_28386.0|BlastHit|gi|55584180|sp|Q61753.3|SERA_MOUSE
10695	1062	C	T	Locus_28387.0|BlastHit|gi|229463041|sp|O14681.4|EI24_HUMAN
10699	1063	G	A	Locus_28391.0|BlastHit|gi|81906595|sp|Q9JHS9.1|CWC15_MOUSE
10699	766	G	A	Locus_28391.0|BlastHit|gi|81906595|sp|Q9JHS9.1|CWC15_MOUSE
10699	811	A	G	Locus_28391.0|BlastHit|gi|81906595|sp|Q9JHS9.1|CWC15_MOUSE
10705	1961	T	A	Locus_28399.0|BlastHit|gi|110816407|sp|Q1RMT7.1|RIOK3_BOVIN
10705	3307	G	C	Locus_28399.0|BlastHit|gi|110816407|sp|Q1RMT7.1|RIOK3_BOVIN
10731	370	A	G	Locus_28431.0|BlastHit|gi|121956694|sp|Q3T0R7.1|THIM_BOVIN
10731	373	T	G	Locus_28431.0|BlastHit|gi|121956694|sp|Q3T0R7.1|THIM_BOVIN
10732	150	A	G	Locus_28432.0|BlastHit|gi|6016103|sp|O73819.1|GNA14_XENLA
10739	2465	A	T	Locus_28440.0|BlastHit|gi|18201959|sp|O13035.1|SAP_CHICK
10743	883	C	A	Locus_28449.0|BlastHit|gi|12644153|sp|P20007.2|PPCK_DROME
10743	919	A	G	Locus_28449.0|BlastHit|gi|12644153|sp|P20007.2|PPCK_DROME
10750	1235	G	A	Locus_28461.0|BlastHit|gi|81889014|sp|Q5I0D7.1|PEPD_RAT
10750	1250	G	T	Locus_28461.0|BlastHit|gi|81889014|sp|Q5I0D7.1|PEPD_RAT
10750	191	T	C	Locus_28461.0|BlastHit|gi|81889014|sp|Q5I0D7.1|PEPD_RAT
10750	219	C	A	Locus_28461.0|BlastHit|gi|81889014|sp|Q5I0D7.1|PEPD_RAT
10750	761	G	A	Locus_28461.0|BlastHit|gi|81889014|sp|Q5I0D7.1|PEPD_RAT
10750	943	C	T	Locus_28461.0|BlastHit|gi|81889014|sp|Q5I0D7.1|PEPD_RAT
10758	177	T	C	Locus_28474.0|BlastHit|gi|81886959|sp|P70684.1|PGDH_CAVPO
10758	333	C	G	Locus_28474.0|BlastHit|gi|81886959|sp|P70684.1|PGDH_CAVPO
10770	1314	T	C	Locus_28489.0|BlastHit|gi|548474|sp|P36836.1|S15A1_RABIT
10772	1544	G	C	Locus_28493.0|BlastHit|gi|75027588|sp|Q9VVA0.1|Y9705_DROME
10774	360	A	G	Locus_28498.0|BlastHit|gi|29428062|sp|Q9VDE5.1|PPAN_DROME
10774	480	C	T	Locus_28498.0|BlastHit|gi|29428062|sp|Q9VDE5.1|PPAN_DROME
10774	903	C	T	Locus_28498.0|BlastHit|gi|29428062|sp|Q9VDE5.1|PPAN_DROME
10796	1476	T	C	Locus_28506.0|BlastHit|gi|12585261|sp|Q9U639.1|HSP7D_MANSE
10796	1500	C	T	Locus_28506.0|BlastHit|gi|12585261|sp|Q9U639.1|HSP7D_MANSE
10796	2015	G	A	Locus_28506.0|BlastHit|gi|12585261|sp|Q9U639.1|HSP7D_MANSE
10796	205	C	G,T	Locus_28506.0|BlastHit|gi|12585261|sp|Q9U639.1|HSP7D_MANSE
10826	1450	A	G	Locus_28533.0|BlastHit|gi|108860789|sp|Q2KIZ8.1|MCM6_BOVIN
10844	2083	A	C	Locus_28549.0|BlastHit|gi|33518622|sp|Q9VHR8.2|DPP3_DROME
10844	919	T	G	Locus_28549.0|BlastHit|gi|33518622|sp|Q9VHR8.2|DPP3_DROME
10844	960	A	G	Locus_28549.0|BlastHit|gi|33518622|sp|Q9VHR8.2|DPP3_DROME
10857	1353	A	G	Locus_28563.0|BlastHit|gi|296439475|sp|Q9NRY5.4|F1142_HUMAN
10857	582	A	G	Locus_28563.0|BlastHit|gi|296439475|sp|Q9NRY5.4|F1142_HUMAN
10857	645	A	G	Locus_28563.0|BlastHit|gi|296439475|sp|Q9NRY5.4|F1142_HUMAN
10860	1674	T	C	Locus_28567.0|BlastHit|gi|8928549|sp|O75027.2|ABCB7_HUMAN
10865	1629	G	A	Locus_28574.0|BlastHit|gi|13124177|sp|O61491.1|FLOT1_DROME
10866	178	G	C	Locus_28575.0|BlastHit|gi|417289|sp|Q00719.1|MDMC_STRMY
10867	166	G	T	Locus_28575.1|BlastHit|gi|75014084|sp|Q86IC8.1|CAMT2_DICDI
10870	987	C	T	Locus_28578.0|BlastHit|gi|13124624|sp|Q9V359.1|VPS28_DROME
10870	996	A	G	Locus_28578.0|BlastHit|gi|13124624|sp|Q9V359.1|VPS28_DROME
10882	1470	C	T	Locus_28595.0|BlastHit|gi|14286157|sp|Q01604.2|PGK_DROME
10882	155	C	T	Locus_28595.0|BlastHit|gi|14286157|sp|Q01604.2|PGK_DROME
10882	354	C	T	Locus_28595.0|BlastHit|gi|14286157|sp|Q01604.2|PGK_DROME
10891	234	C	G	Locus_28604.0|BlastHit|gi|38257780|sp|Q9NXK8.1|FXL12_HUMAN
10892	109	A	C	Locus_28604.0|BlastHit|gi|38257780|sp|Q9NXK8.1|FXL12_HUMAN
10893	263	A	G	Locus_28604.0|BlastHit|gi|38257780|sp|Q9NXK8.1|FXL12_HUMAN
10893	37	T	A	Locus_28604.0|BlastHit|gi|38257780|sp|Q9NXK8.1|FXL12_HUMAN
10893	40	A	G	Locus_28604.0|BlastHit|gi|38257780|sp|Q9NXK8.1|FXL12_HUMAN
10893	61	C	T	Locus_28604.0|BlastHit|gi|38257780|sp|Q9NXK8.1|FXL12_HUMAN
10907	1024	T	A	Locus_28615.0|BlastHit|gi|20455192|sp|Q9UKK9.1|NUDT5_HUMAN
10907	1032	G	A	Locus_28615.0|BlastHit|gi|20455192|sp|Q9UKK9.1|NUDT5_HUMAN
10907	1057	T	C	Locus_28615.0|BlastHit|gi|20455192|sp|Q9UKK9.1|NUDT5_HUMAN
10907	1060	G	T	Locus_28615.0|BlastHit|gi|20455192|sp|Q9UKK9.1|NUDT5_HUMAN
10907	1425	A	T	Locus_28615.0|BlastHit|gi|20455192|sp|Q9UKK9.1|NUDT5_HUMAN
10907	1658	C	T	Locus_28615.0|BlastHit|gi|20455192|sp|Q9UKK9.1|NUDT5_HUMAN
10907	834	G	T	Locus_28615.0|BlastHit|gi|20455192|sp|Q9UKK9.1|NUDT5_HUMAN
10907	844	A	T	Locus_28615.0|BlastHit|gi|20455192|sp|Q9UKK9.1|NUDT5_HUMAN
10908	1961	A	G	Locus_28616.0|BlastHit|gi|114162|sp|P18824.1|ARM_DROME
10908	2174	C	T	Locus_28616.0|BlastHit|gi|114162|sp|P18824.1|ARM_DROME
10908	2187	C	T	Locus_28616.0|BlastHit|gi|114162|sp|P18824.1|ARM_DROME
10908	2300	C	T	Locus_28616.0|BlastHit|gi|114162|sp|P18824.1|ARM_DROME
10908	2534	C	A	Locus_28616.0|BlastHit|gi|114162|sp|P18824.1|ARM_DROME
10920	2679	A	C	Locus_28623.0|BlastHit|gi|68566130|sp|Q6P1B1.1|XPP1_MOUSE
10952	1647	T	G	Locus_28644.0|BlastHit|gi|205831550|sp|Q03168.2|ASPP_AEDAE
10957	192	C	T	Locus_28650.0|BlastHit|gi|74644329|sp|Q8TGM6.1|TAR1_YEAST
10957	232	G	T	Locus_28650.0|BlastHit|gi|74644329|sp|Q8TGM6.1|TAR1_YEAST
1095	25	C	T	Locus_7934.0|BlastHit|gi|338817955|sp|Q8VI47.2|MRP2_MOUSE
10979	1185	T	A	Locus_28666.0|BlastHit|gi|82184085|sp|Q6GMK6.1|TSN9_DANRE
1097	485	C	T	Locus_7939.0|BlastHit|gi|400525|sp|Q02372.1|NDUB8_BOVIN
10981	239	C	A	Locus_28670.0|BlastHit|gi|189081212|sp|A6QLU7.1|F115C_BOVIN
10981	422	C	G	Locus_28670.0|BlastHit|gi|189081212|sp|A6QLU7.1|F115C_BOVIN
10983	616	C	T	Locus_28672.0|BlastHit|gi|34395789|sp|Q8TC12.2|RDH11_HUMAN
1098	379	C	T	Locus_7943.0|BlastHit|gi|6093786|sp|O73817.1|PSB3_ONCMY
10991	183	A	T	Locus_28684.0|BlastHit|gi|187609599|sp|A7SMW7.1|L2HDH_NEMVE
10991	532	G	A	Locus_28684.0|BlastHit|gi|187609599|sp|A7SMW7.1|L2HDH_NEMVE
10996	3421	G	A	Locus_28689.0|BlastHit|gi|81873757|sp|Q8BH24.1|TM9S4_MOUSE
11003	581	G	T,C	Locus_28697.0|BlastHit|gi|71153176|sp|P22293.2|SUS_DROME
11006	869	A	G	Locus_28701.0|BlastHit|gi|122135265|sp|Q29RI9.1|MAT2B_BOVIN
11006	927	C	T	Locus_28701.0|BlastHit|gi|122135265|sp|Q29RI9.1|MAT2B_BOVIN
11008	156	G	A	Locus_28703.1|BlastHit|gi|110282935|sp|P20004.4|ACON_BOVIN
11008	2103	C	T	Locus_28703.1|BlastHit|gi|110282935|sp|P20004.4|ACON_BOVIN
11008	2106	T	C	Locus_28703.1|BlastHit|gi|110282935|sp|P20004.4|ACON_BOVIN
11008	867	T	A	Locus_28703.1|BlastHit|gi|110282935|sp|P20004.4|ACON_BOVIN
1100	130	T	A	Locus_7953.0|BlastHit|gi|74870864|sp|Q9VTH4.1|SCLLA_DROME
1100	1333	T	A	Locus_7953.0|BlastHit|gi|74870864|sp|Q9VTH4.1|SCLLA_DROME
11012	10051	A	C	Locus_28707.0|BlastHit|gi|2851461|sp|Q03755.2|CUT1_CAEEL
11018	1050	G	A	Locus_28713.0|BlastHit|gi|20177939|sp|Q9NZ01.1|TECR_HUMAN
11018	350	T	C	Locus_28713.0|BlastHit|gi|20177939|sp|Q9NZ01.1|TECR_HUMAN
11018	896	A	G	Locus_28713.0|BlastHit|gi|20177939|sp|Q9NZ01.1|TECR_HUMAN
11020	2816	A	G	Locus_28714.1|BlastHit|gi|82188575|sp|Q7ZV34.1|MCTS1_DANRE
11035	2326	C	T	Locus_28727.0|BlastHit|gi|83288378|sp|Q3SYZ8.1|PDLI3_BOVIN
11035	2674	C	G	Locus_28727.0|BlastHit|gi|83288378|sp|Q3SYZ8.1|PDLI3_BOVIN
11035	2676	A	G	Locus_28727.0|BlastHit|gi|83288378|sp|Q3SYZ8.1|PDLI3_BOVIN
11057	1722	T	C	Locus_28734.0|BlastHit|gi|51316882|sp|Q8WVM8.4|SCFD1_HUMAN
11057	2456	T	C	Locus_28734.0|BlastHit|gi|51316882|sp|Q8WVM8.4|SCFD1_HUMAN
11057	2610	C	G	Locus_28734.0|BlastHit|gi|51316882|sp|Q8WVM8.4|SCFD1_HUMAN
11067	1703	G	A	Locus_28742.0|BlastHit|gi|74705530|sp|O15504.1|NUPL2_HUMAN
11068	227	A	C	Locus_28743.0|BlastHit|gi|296452899|sp|Q99884.2|SC6A7_HUMAN
11096	1808	C	A	Locus_28745.3|BlastHit|gi|73919224|sp|Q6PH85.1|DCNL2_HUMAN
11115	484	G	A	Locus_28757.0|BlastHit|gi|238065895|sp|B5SNZ6.1|ABRA_PIG
11116	2034	T	C	Locus_28758.1|BlastHit|gi|75070497|sp|Q5R5V4.1|ILK_PONAB
11116	2461	C	A	Locus_28758.1|BlastHit|gi|75070497|sp|Q5R5V4.1|ILK_PONAB
11116	3621	C	T	Locus_28758.1|BlastHit|gi|75070497|sp|Q5R5V4.1|ILK_PONAB
11116	401	G	A	Locus_28758.1|BlastHit|gi|75070497|sp|Q5R5V4.1|ILK_PONAB
11116	485	G	A	Locus_28758.1|BlastHit|gi|75070497|sp|Q5R5V4.1|ILK_PONAB
11116	722	T	G	Locus_28758.1|BlastHit|gi|75070497|sp|Q5R5V4.1|ILK_PONAB
11119	2098	C	T	Locus_28764.0|BlastHit|gi|74948427|sp|Q9VRP9.2|BRE1_DROME
11119	2347	T	C	Locus_28764.0|BlastHit|gi|74948427|sp|Q9VRP9.2|BRE1_DROME
11124	1373	C	T	Locus_28769.0|BlastHit|gi|129688|sp|P21902.1|PCE_TACTR
11124	1779	G	A	Locus_28769.0|BlastHit|gi|129688|sp|P21902.1|PCE_TACTR
11124	1827	C	T	Locus_28769.0|BlastHit|gi|129688|sp|P21902.1|PCE_TACTR
11124	2029	G	A	Locus_28769.0|BlastHit|gi|129688|sp|P21902.1|PCE_TACTR
11126	162	A	G	Locus_28772.0|BlastHit|gi|182701417|sp|Q5EA11.2|TTC4_BOVIN
11126	578	C	T	Locus_28772.0|BlastHit|gi|182701417|sp|Q5EA11.2|TTC4_BOVIN
11126	579	C	T	Locus_28772.0|BlastHit|gi|182701417|sp|Q5EA11.2|TTC4_BOVIN
11126	624	A	C	Locus_28772.0|BlastHit|gi|182701417|sp|Q5EA11.2|TTC4_BOVIN
11126	804	A	G	Locus_28772.0|BlastHit|gi|182701417|sp|Q5EA11.2|TTC4_BOVIN
11129	1139	G	A	Locus_28778.0|BlastHit|gi|121755|sp|P11167.1|GTR1_RAT
11131	1156	G	C	Locus_28780.0|BlastHit|gi|74872350|sp|Q9W2D6.1|TIM10_DROME
11131	1162	A	G	Locus_28780.0|BlastHit|gi|74872350|sp|Q9W2D6.1|TIM10_DROME
11131	139	A	G	Locus_28780.0|BlastHit|gi|74872350|sp|Q9W2D6.1|TIM10_DROME
11132	239	G	A	Locus_28781.0|BlastHit|gi|82228534|sp|Q4V842.1|GPTC4_XENLA
11132	267	C	G	Locus_28781.0|BlastHit|gi|82228534|sp|Q4V842.1|GPTC4_XENLA
11140	273	C	T	Locus_28784.0|BlastHit|gi|221222504|sp|Q293F6.2|SSRP1_DROPS
11140	282	C	T	Locus_28784.0|BlastHit|gi|221222504|sp|Q293F6.2|SSRP1_DROPS
11140	663	G	A	Locus_28784.0|BlastHit|gi|221222504|sp|Q293F6.2|SSRP1_DROPS
11140	681	G	A	Locus_28784.0|BlastHit|gi|221222504|sp|Q293F6.2|SSRP1_DROPS
11143	1521	T	C	Locus_28791.0|BlastHit|gi|85681897|sp|Q9Z2I8.3|SUCB2_MOUSE
11143	462	T	C	Locus_28791.0|BlastHit|gi|85681897|sp|Q9Z2I8.3|SUCB2_MOUSE
11143	590	C	T	Locus_28791.0|BlastHit|gi|85681897|sp|Q9Z2I8.3|SUCB2_MOUSE
11143	939	T	C	Locus_28791.0|BlastHit|gi|85681897|sp|Q9Z2I8.3|SUCB2_MOUSE
11149	850	G	A	Locus_28796.0|BlastHit|gi|110287795|sp|Q2HJ56.1|PWP1_BOVIN
11149	880	G	A	Locus_28796.0|BlastHit|gi|110287795|sp|Q2HJ56.1|PWP1_BOVIN
11155	177	A	G	Locus_28800.0|BlastHit|gi|205371857|sp|P90850.3|YCF2E_CAEEL
11155	375	T	C,G	Locus_28800.0|BlastHit|gi|205371857|sp|P90850.3|YCF2E_CAEEL
11155	399	C	T	Locus_28800.0|BlastHit|gi|205371857|sp|P90850.3|YCF2E_CAEEL
11155	63	T	C	Locus_28800.0|BlastHit|gi|205371857|sp|P90850.3|YCF2E_CAEEL
11155	82	T	A	Locus_28800.0|BlastHit|gi|205371857|sp|P90850.3|YCF2E_CAEEL
11160	1838	G	A	Locus_28808.0|BlastHit|gi|162416065|sp|A4IHG1.1|LRC58_XENTR
11160	915	C	A	Locus_28808.0|BlastHit|gi|162416065|sp|A4IHG1.1|LRC58_XENTR
11162	505	G	A	Locus_28810.0|BlastHit|gi|81880060|sp|Q99JW2.1|ACY1_MOUSE
11162	799	C	T	Locus_28810.0|BlastHit|gi|81880060|sp|Q99JW2.1|ACY1_MOUSE
11163	312	C	T	Locus_28810.1|BlastHit|gi|74858755|sp|Q55DP8.1|ACY1_DICDI
11170	3795	T	C	Locus_28815.0|BlastHit|gi|334302902|sp|Q68DX3.3|FRPD2_HUMAN
11172	3947	G	C	Locus_28816.0|BlastHit|gi|20139135|sp|Q9C5Y0.2|PLDD1_ARATH
11175	2499	G	A	Locus_28820.0|BlastHit|gi|74746390|sp|Q5TFE4.1|NT5D1_HUMAN
11212	5454	A	T	Locus_28857.1|BlastHit|gi|296439506|sp|Q92616.6|GCN1L_HUMAN
11235	1048	C	T	Locus_28871.0|BlastHit|gi|67460945|sp|Q86BJ3.1|PIPE_DROME
11235	1186	C	T	Locus_28871.0|BlastHit|gi|67460945|sp|Q86BJ3.1|PIPE_DROME
11235	456	G	A	Locus_28871.0|BlastHit|gi|67460945|sp|Q86BJ3.1|PIPE_DROME
11235	487	G	A	Locus_28871.0|BlastHit|gi|67460945|sp|Q86BJ3.1|PIPE_DROME
11235	543	C	A	Locus_28871.0|BlastHit|gi|67460945|sp|Q86BJ3.1|PIPE_DROME
11235	736	G	T	Locus_28871.0|BlastHit|gi|67460945|sp|Q86BJ3.1|PIPE_DROME
11235	742	G	C	Locus_28871.0|BlastHit|gi|67460945|sp|Q86BJ3.1|PIPE_DROME
11235	793	C	G	Locus_28871.0|BlastHit|gi|67460945|sp|Q86BJ3.1|PIPE_DROME
11235	874	C	T	Locus_28871.0|BlastHit|gi|67460945|sp|Q86BJ3.1|PIPE_DROME
11235	991	C	T	Locus_28871.0|BlastHit|gi|67460945|sp|Q86BJ3.1|PIPE_DROME
11266	286	C	A	Locus_28885.0|BlastHit|gi|75029576|sp|Q9Y140.1|DHRS7_DROME
11266	572	A	G	Locus_28885.0|BlastHit|gi|75029576|sp|Q9Y140.1|DHRS7_DROME
11318	1207	A	C	Locus_28916.0|BlastHit|gi|34395894|sp|Q8Q0U0.1|Y045_METMA
11339	1649	T	C	Locus_28928.0|BlastHit|gi|82180006|sp|Q5U4K5.1|TM41B_XENLA
11363	259	G	A	Locus_28956.0|BlastHit|gi|218511774|sp|O95487.2|SC24B_HUMAN
11369	348	A	T	Locus_28962.0|BlastHit|gi|75076495|sp|Q4R6U7.1|RM30_MACFA
11369	873	G	A	Locus_28962.0|BlastHit|gi|75076495|sp|Q4R6U7.1|RM30_MACFA
11374	473	A	G	Locus_28966.0|BlastHit|gi|108860901|sp|Q29RZ2.1|PPWD1_BOVIN
11382	335	C	T	Locus_28980.0|BlastHit|gi|21542021|sp|Q9VAI1.1|CIA30_DROME
11382	355	T	A	Locus_28980.0|BlastHit|gi|21542021|sp|Q9VAI1.1|CIA30_DROME
11382	476	A	G	Locus_28980.0|BlastHit|gi|21542021|sp|Q9VAI1.1|CIA30_DROME
11383	1314	C	G	Locus_28980.0|BlastHit|gi|21542021|sp|Q9VAI1.1|CIA30_DROME
11383	300	G	A	Locus_28980.0|BlastHit|gi|21542021|sp|Q9VAI1.1|CIA30_DROME
11383	485	C	A	Locus_28980.0|BlastHit|gi|21542021|sp|Q9VAI1.1|CIA30_DROME
11383	653	G	T	Locus_28980.0|BlastHit|gi|21542021|sp|Q9VAI1.1|CIA30_DROME
11383	870	T	C	Locus_28980.0|BlastHit|gi|21542021|sp|Q9VAI1.1|CIA30_DROME
11389	144	G	A	Locus_28991.0|BlastHit|gi|12643524|sp|Q9Y105.1|SYQ_DROME
11389	2720	T	C	Locus_28991.0|BlastHit|gi|12643524|sp|Q9Y105.1|SYQ_DROME
11428	1054	A	G	Locus_29028.0|BlastHit|gi|61211706|sp|O88199.1|CHST3_MOUSE
11428	1573	A	G	Locus_29028.0|BlastHit|gi|61211706|sp|O88199.1|CHST3_MOUSE
11428	1780	G	T	Locus_29028.0|BlastHit|gi|61211706|sp|O88199.1|CHST3_MOUSE
11434	2406	T	C	Locus_29034.0|BlastHit|gi|17380291|sp|Q92900.2|RENT1_HUMAN
11436	1634	T	C	Locus_29036.0|BlastHit|gi|12230398|sp|Q9JJK4.1|PEX3_RAT
11436	1718	T	C	Locus_29036.0|BlastHit|gi|12230398|sp|Q9JJK4.1|PEX3_RAT
11437	1117	G	T,A	Locus_29037.0|BlastHit|gi|75054780|sp|Q5R5X9.1|SMYD4_PONAB
11437	1171	T	C	Locus_29037.0|BlastHit|gi|75054780|sp|Q5R5X9.1|SMYD4_PONAB
11437	254	C	A	Locus_29037.0|BlastHit|gi|75054780|sp|Q5R5X9.1|SMYD4_PONAB
1147	595	C	T	Locus_8177.0|BlastHit|gi|12585194|sp|Q9U505.1|ATP9_MANSE
11491	1170	G	T	Locus_29066.0|BlastHit|gi|60390624|sp|Q66S03.1|NATTE_THANI
11510	289	G	C	Locus_29072.0|BlastHit|gi|82081935|sp|Q5ZK33.1|LETM1_CHICK
11521	1814	G	A	Locus_29085.1|BlastHit|gi|82173834|sp|Q5TZ07.1|PPAC2_DANRE
11521	1895	T	A	Locus_29085.1|BlastHit|gi|82173834|sp|Q5TZ07.1|PPAC2_DANRE
11530	1568	C	T	Locus_29088.2|BlastHit|gi|60390624|sp|Q66S03.1|NATTE_THANI
11533	647	A	C	Locus_29089.0|BlastHit|gi|82237294|sp|Q6NX31.1|MCM7_XENTR
11539	1364	C	A	Locus_29096.0|BlastHit|gi|341940173|sp|Q9R0W9.2|ACHA6_MOUSE
11550	1253	A	T	Locus_29105.0|BlastHit|gi|108861919|sp|Q2TBG8.1|UCHL3_BOVIN
11550	1402	G	A	Locus_29105.0|BlastHit|gi|108861919|sp|Q2TBG8.1|UCHL3_BOVIN
11550	2059	C	G	Locus_29105.0|BlastHit|gi|108861919|sp|Q2TBG8.1|UCHL3_BOVIN
11550	2063	G	A	Locus_29105.0|BlastHit|gi|108861919|sp|Q2TBG8.1|UCHL3_BOVIN
11550	932	A	T	Locus_29105.0|BlastHit|gi|108861919|sp|Q2TBG8.1|UCHL3_BOVIN
11553	1195	C	T	Locus_29109.0|BlastHit|gi|82187285|sp|Q6PGY5.1|DJC21_DANRE
11553	1487	A	G	Locus_29109.0|BlastHit|gi|82187285|sp|Q6PGY5.1|DJC21_DANRE
11553	1693	G	A	Locus_29109.0|BlastHit|gi|82187285|sp|Q6PGY5.1|DJC21_DANRE
11562	936	A	G	Locus_29117.3|BlastHit|gi|46576378|sp|Q00168.1|KCC2A_DROME
11571	1496	A	T	Locus_29128.0|BlastHit|gi|66774173|sp|Q62703.2|RCN2_RAT
11571	1683	C	T	Locus_29128.0|BlastHit|gi|66774173|sp|Q62703.2|RCN2_RAT
11571	2471	A	T	Locus_29128.0|BlastHit|gi|66774173|sp|Q62703.2|RCN2_RAT
11571	2688	A	G	Locus_29128.0|BlastHit|gi|66774173|sp|Q62703.2|RCN2_RAT
11571	2711	T	G	Locus_29128.0|BlastHit|gi|66774173|sp|Q62703.2|RCN2_RAT
11572	1082	A	G	Locus_29131.0|BlastHit|gi|152031592|sp|P27867.4|DHSO_RAT
11572	1090	C	A	Locus_29131.0|BlastHit|gi|152031592|sp|P27867.4|DHSO_RAT
11572	578	C	T	Locus_29131.0|BlastHit|gi|152031592|sp|P27867.4|DHSO_RAT
11572	770	G	A	Locus_29131.0|BlastHit|gi|152031592|sp|P27867.4|DHSO_RAT
11596	1515	G	T	Locus_29160.0|BlastHit|gi|136424|sp|P00765.1|TRYP_ASTFL
11596	1518	C	A	Locus_29160.0|BlastHit|gi|136424|sp|P00765.1|TRYP_ASTFL
11599	2843	T	A	Locus_29164.1|BlastHit|gi|148887465|sp|P24399.2|ZN239_MOUSE
11611	1271	T	C	Locus_29172.0|BlastHit|gi|117949833|sp|P50143.2|TCPG_XENLA
11611	1321	C	T	Locus_29172.0|BlastHit|gi|117949833|sp|P50143.2|TCPG_XENLA
11611	1714	A	T	Locus_29172.0|BlastHit|gi|117949833|sp|P50143.2|TCPG_XENLA
11611	1751	T	A	Locus_29172.0|BlastHit|gi|117949833|sp|P50143.2|TCPG_XENLA
11611	2030	G	A	Locus_29172.0|BlastHit|gi|117949833|sp|P50143.2|TCPG_XENLA
11613	1287	A	T	Locus_29174.0|BlastHit|gi|81917204|sp|Q9DC33.1|HM20A_MOUSE
11613	675	C	T	Locus_29174.0|BlastHit|gi|81917204|sp|Q9DC33.1|HM20A_MOUSE
11613	747	A	G	Locus_29174.0|BlastHit|gi|81917204|sp|Q9DC33.1|HM20A_MOUSE
11618	1556	C	G	Locus_29177.0|BlastHit|gi|25009458|sp|Q8VCT9.1|TESK2_MOUSE
11618	3350	G	A	Locus_29177.0|BlastHit|gi|25009458|sp|Q8VCT9.1|TESK2_MOUSE
11618	854	G	T	Locus_29177.0|BlastHit|gi|25009458|sp|Q8VCT9.1|TESK2_MOUSE
11621	720	A	C	Locus_29179.0|BlastHit|gi|71153786|sp|Q5ZKD5.1|RRP12_CHICK
11629	690	A	G	Locus_29195.0|BlastHit|gi|73921234|sp|Q7T0Q5.1|NOL10_XENLA
11639	585	T	C	Locus_29197.0|BlastHit|gi|190358745|sp|B1AR13.1|CISD3_MOUSE
1163	369	G	A	Locus_8223.0|BlastHit|gi|20137573|sp|Q9W141.1|ATPK_DROME
1163	558	G	A	Locus_8223.0|BlastHit|gi|20137573|sp|Q9W141.1|ATPK_DROME
11654	340	C	T	Locus_29211.0|BlastHit|gi|50401181|sp|Q9NWZ3.1|IRAK4_HUMAN
11655	998	T	C	Locus_29214.0|BlastHit|gi|47117884|sp|Q01819.2|CONN_DROME
11659	808	C	T	Locus_29219.0|BlastHit|gi|67472684|sp|Q6IDD9.1|SARM1_DROME
11668	1075	A	C	Locus_29228.0|BlastHit|gi|56404943|sp|Q99497.2|PARK7_HUMAN
11668	1157	A	C	Locus_29228.0|BlastHit|gi|56404943|sp|Q99497.2|PARK7_HUMAN
11668	1367	T	C	Locus_29228.0|BlastHit|gi|56404943|sp|Q99497.2|PARK7_HUMAN
11668	1983	A	T	Locus_29228.0|BlastHit|gi|56404943|sp|Q99497.2|PARK7_HUMAN
11668	688	C	T	Locus_29228.0|BlastHit|gi|56404943|sp|Q99497.2|PARK7_HUMAN
11668	865	A	G	Locus_29228.0|BlastHit|gi|56404943|sp|Q99497.2|PARK7_HUMAN
11668	898	C	T	Locus_29228.0|BlastHit|gi|56404943|sp|Q99497.2|PARK7_HUMAN
11676	956	A	G	Locus_29235.0|BlastHit|gi|66774176|sp|P98081.2|DAB_DROME
11678	2518	C	A	Locus_29236.0|BlastHit|gi|167016544|sp|A6QL88.1|SAC1_BOVIN
11687	3554	G	A	Locus_29240.0|BlastHit|gi|71658801|sp|Q8ND76.2|CCNY_HUMAN
11695	1084	A	G	Locus_29247.0|BlastHit|gi|122194124|sp|Q1W374.1|PMM_WHEAT
11695	1102	G	T	Locus_29247.0|BlastHit|gi|122194124|sp|Q1W374.1|PMM_WHEAT
11695	534	C	T	Locus_29247.0|BlastHit|gi|122194124|sp|Q1W374.1|PMM_WHEAT
11695	603	T	G	Locus_29247.0|BlastHit|gi|122194124|sp|Q1W374.1|PMM_WHEAT
11695	642	T	C	Locus_29247.0|BlastHit|gi|122194124|sp|Q1W374.1|PMM_WHEAT
11695	76	G	A	Locus_29247.0|BlastHit|gi|122194124|sp|Q1W374.1|PMM_WHEAT
11696	1321	C	T	Locus_29248.0|BlastHit|gi|76365069|sp|Q8MZR6.3|HYEP1_CTEFE
11696	248	A	T	Locus_29248.0|BlastHit|gi|76365069|sp|Q8MZR6.3|HYEP1_CTEFE
11701	1054	A	C	Locus_29253.0|BlastHit|gi|136424|sp|P00765.1|TRYP_ASTFL
11701	1297	G	A	Locus_29253.0|BlastHit|gi|136424|sp|P00765.1|TRYP_ASTFL
11701	562	A	G	Locus_29253.0|BlastHit|gi|136424|sp|P00765.1|TRYP_ASTFL
11705	1619	A	G	Locus_29258.1|BlastHit|gi|13124003|sp|O95433.1|AHSA1_HUMAN
11706	5683	G	T	Locus_29259.0|BlastHit|gi|74724250|sp|Q96PE2.1|ARHGH_HUMAN
11708	1865	G	T	Locus_29263.0|BlastHit|gi|231885|sp|P29981.1|CP4C1_BLADI
11718	2489	G	C	Locus_29283.0|BlastHit|gi|76800653|sp|Q05319.2|STUB_DROME
11738	111	T	G	Locus_29292.0|BlastHit|gi|160332353|sp|Q6DBY9.2|CHST1_DANRE
11738	1188	C	T	Locus_29292.0|BlastHit|gi|160332353|sp|Q6DBY9.2|CHST1_DANRE
11738	641	C	T	Locus_29292.0|BlastHit|gi|160332353|sp|Q6DBY9.2|CHST1_DANRE
11741	476	C	T	Locus_29296.1|BlastHit|gi|341941732|sp|O88685.2|PRS6A_MOUSE
11741	944	C	T	Locus_29296.1|BlastHit|gi|341941732|sp|O88685.2|PRS6A_MOUSE
11743	187	A	C	Locus_29297.0|BlastHit|gi|74871800|sp|Q9VZ49.1|ENDOU_DROME
11775	2727	A	G	Locus_29318.1|BlastHit|gi|38258809|sp|Q8TAA9.1|VANG1_HUMAN
11787	261	A	C	Locus_29330.0|BlastHit|gi|116241246|sp|P16157.3|ANK1_HUMAN
11808	2281	C	T	Locus_29360.0|BlastHit|gi|75049909|sp|Q9GKT2.1|CE004_MACFA
11808	2808	A	G	Locus_29360.0|BlastHit|gi|75049909|sp|Q9GKT2.1|CE004_MACFA
11808	2992	G	T	Locus_29360.0|BlastHit|gi|75049909|sp|Q9GKT2.1|CE004_MACFA
11808	4375	T	A	Locus_29360.0|BlastHit|gi|75049909|sp|Q9GKT2.1|CE004_MACFA
11809	465	C	T	Locus_29361.0|BlastHit|gi|82183574|sp|Q6DJC8.1|TM53B_XENLA
11809	547	A	G	Locus_29361.0|BlastHit|gi|82183574|sp|Q6DJC8.1|TM53B_XENLA
11810	3120	G	A	Locus_29362.0|BlastHit|gi|378405194|sp|Q10215.2|RDL_SCHPO
11819	192	T	C	Locus_29370.0|BlastHit|gi|313104228|sp|Q9Y5N5.3|HEMK2_HUMAN
11820	76	T	A	Locus_29371.0|BlastHit|gi|84028183|sp|O62839.4|CATA_PIG
11853	585	C	A	Locus_29400.0|BlastHit|gi|97180304|sp|Q4JIM4.1|PSN1_CHICK
11860	514	G	A	Locus_29406.0|BlastHit|gi|20137769|sp|P91791.1|PPIA_HEMPU
11868	1557	A	G	Locus_29410.0|BlastHit|gi|290457659|sp|O93309.2|SMC3_XENLA
11868	3036	G	A	Locus_29410.0|BlastHit|gi|290457659|sp|O93309.2|SMC3_XENLA
11868	3146	A	G	Locus_29410.0|BlastHit|gi|290457659|sp|O93309.2|SMC3_XENLA
11871	1687	A	G	Locus_29413.1|BlastHit|gi|34395906|sp|Q99N42.1|TYPH_MOUSE
11871	495	C	T	Locus_29413.1|BlastHit|gi|34395906|sp|Q99N42.1|TYPH_MOUSE
11871	813	A	G	Locus_29413.1|BlastHit|gi|34395906|sp|Q99N42.1|TYPH_MOUSE
11889	1045	C	T	Locus_29427.0|BlastHit|gi|117423|sp|P80029.1|CRC1_HOMGA
11890	1323	A	G	Locus_29428.0|BlastHit|gi|74822282|sp|Q962X9.1|BUD31_BRABE
11890	1536	C	T	Locus_29428.0|BlastHit|gi|74822282|sp|Q962X9.1|BUD31_BRABE
11890	264	A	C	Locus_29428.0|BlastHit|gi|74822282|sp|Q962X9.1|BUD31_BRABE
11890	581	A	G	Locus_29428.0|BlastHit|gi|74822282|sp|Q962X9.1|BUD31_BRABE
11901	439	A	G	Locus_29434.0|BlastHit|gi|81914660|sp|Q8K339.1|KIN17_MOUSE
11908	2351	T	G	Locus_29444.0|BlastHit|gi|2833239|sp|Q12929.1|EPS8_HUMAN
11943	1059	T	A	Locus_29475.0|BlastHit|gi|118505|sp|P11884.1|ALDH2_RAT
11943	1122	C	T	Locus_29475.0|BlastHit|gi|118505|sp|P11884.1|ALDH2_RAT
11943	1152	T	G	Locus_29475.0|BlastHit|gi|118505|sp|P11884.1|ALDH2_RAT
11943	1383	G	A	Locus_29475.0|BlastHit|gi|118505|sp|P11884.1|ALDH2_RAT
11943	1527	T	A	Locus_29475.0|BlastHit|gi|118505|sp|P11884.1|ALDH2_RAT
11943	1681	G	T	Locus_29475.0|BlastHit|gi|118505|sp|P11884.1|ALDH2_RAT
11943	1802	G	C	Locus_29475.0|BlastHit|gi|118505|sp|P11884.1|ALDH2_RAT
11943	1999	G	C	Locus_29475.0|BlastHit|gi|118505|sp|P11884.1|ALDH2_RAT
11943	745	G	A	Locus_29475.0|BlastHit|gi|118505|sp|P11884.1|ALDH2_RAT
11945	2821	G	A	Locus_29478.0|BlastHit|gi|143811387|sp|P81623.2|ERP29_BOVIN
11945	3211	G	T	Locus_29478.0|BlastHit|gi|143811387|sp|P81623.2|ERP29_BOVIN
11949	1227	A	G,T	Locus_29482.0|BlastHit|gi|7531164|sp|P70617.1|NINJ1_RAT
11949	2926	C	G	Locus_29482.0|BlastHit|gi|7531164|sp|P70617.1|NINJ1_RAT
11974	1181	G	A	Locus_29490.0|BlastHit|gi|205716433|sp|A1L258.1|D2HDH_DANRE
1197	26	A	C,G	Locus_8385.0|BlastHit|gi|74644329|sp|Q8TGM6.1|TAR1_YEAST
11982	488	G	A	Locus_29501.0|BlastHit|gi|300681185|sp|B0WC46.1|TRET1_CULQU
11983	1384	C	T	Locus_29502.1|BlastHit|gi|6093774|sp|Q92058.1|PPBT_CHICK
11983	154	T	G,A	Locus_29502.1|BlastHit|gi|6093774|sp|Q92058.1|PPBT_CHICK
11983	520	A	G	Locus_29502.1|BlastHit|gi|6093774|sp|Q92058.1|PPBT_CHICK
11983	640	C	T	Locus_29502.1|BlastHit|gi|6093774|sp|Q92058.1|PPBT_CHICK
11987	2688	G	A	Locus_29506.0|BlastHit|gi|123785726|sp|Q4FZT9.1|PSMD2_RAT
11993	1482	G	T	Locus_29512.0|BlastHit|gi|13878771|sp|Q9Z2G6.2|SE1L1_MOUSE
11993	2334	G	A	Locus_29512.0|BlastHit|gi|13878771|sp|Q9Z2G6.2|SE1L1_MOUSE
11993	3367	A	G	Locus_29512.0|BlastHit|gi|13878771|sp|Q9Z2G6.2|SE1L1_MOUSE
11993	488	C	T	Locus_29512.0|BlastHit|gi|13878771|sp|Q9Z2G6.2|SE1L1_MOUSE
11994	269	G	A	Locus_29513.0|BlastHit|gi|187611323|sp|Q5TZ24.2|MOXD1_DANRE
11996	1120	G	T	Locus_29515.0|BlastHit|gi|123792407|sp|Q4KLI2.1|RG9D2_RAT
11996	530	C	A	Locus_29515.0|BlastHit|gi|123792407|sp|Q4KLI2.1|RG9D2_RAT
11999	465	G	A	Locus_29523.0|BlastHit|gi|66773863|sp|Q5R4T7.2|MKKS_PONAB
12000	633	A	G	Locus_29528.0|BlastHit|gi|122142430|sp|Q0VCQ4.1|RRFM_BOVIN
12006	2761	C	A	Locus_29535.0|BlastHit|gi|37537825|sp|Q96A83.1|EMID2_HUMAN
12019	1111	C	T	Locus_29548.0|BlastHit|gi|75076159|sp|Q4R5V2.1|CO024_MACFA
12019	1356	A	T	Locus_29548.0|BlastHit|gi|75076159|sp|Q4R5V2.1|CO024_MACFA
12019	1559	T	C	Locus_29548.0|BlastHit|gi|75076159|sp|Q4R5V2.1|CO024_MACFA
12019	2028	A	C	Locus_29548.0|BlastHit|gi|75076159|sp|Q4R5V2.1|CO024_MACFA
12019	2035	G	A	Locus_29548.0|BlastHit|gi|75076159|sp|Q4R5V2.1|CO024_MACFA
12019	2133	C	A	Locus_29548.0|BlastHit|gi|75076159|sp|Q4R5V2.1|CO024_MACFA
12019	615	G	C	Locus_29548.0|BlastHit|gi|75076159|sp|Q4R5V2.1|CO024_MACFA
1201	1109	A	C	Locus_8401.1|BlastHit|gi|51701348|sp|Q99PA3.1|BASI_CRIGR
12020	104	C	T	Locus_29551.0|BlastHit|gi|84028322|sp|Q66HG4.1|GALM_RAT
12023	1165	T	C	Locus_29556.0|BlastHit|gi|61213484|sp|Q6ZV73.2|FGD6_HUMAN
12023	2674	G	A	Locus_29556.0|BlastHit|gi|61213484|sp|Q6ZV73.2|FGD6_HUMAN
12023	923	A	G	Locus_29556.0|BlastHit|gi|61213484|sp|Q6ZV73.2|FGD6_HUMAN
12025	1677	C	T	Locus_29556.1|BlastHit|gi|61213484|sp|Q6ZV73.2|FGD6_HUMAN
12028	1394	T	C	Locus_29558.0|BlastHit|gi|6174925|sp|P31228.2|OXDD_BOVIN
12028	842	A	G	Locus_29558.0|BlastHit|gi|6174925|sp|P31228.2|OXDD_BOVIN
12037	609	T	A	Locus_29564.0|BlastHit|gi|298286828|sp|P22979.2|HSP6C_DROME
12041	433	G	T	Locus_29567.0|BlastHit|gi|81889681|sp|Q5U419.1|MFSD3_MOUSE
12047	1954	A	T	Locus_29573.0|BlastHit|gi|12230570|sp|O65199.1|SODCP_VITVI
12063	2015	C	T	Locus_29580.0|BlastHit|gi|82197998|sp|Q63ZT8.1|AL1L1_XENTR
12063	3954	T	G	Locus_29580.0|BlastHit|gi|82197998|sp|Q63ZT8.1|AL1L1_XENTR
12063	749	G	A	Locus_29580.0|BlastHit|gi|82197998|sp|Q63ZT8.1|AL1L1_XENTR
12078	16	C	A	Locus_29586.0|BlastHit|gi|2492667|sp|Q24733.1|ACT_DICVI
12078	161	T	C	Locus_29586.0|BlastHit|gi|2492667|sp|Q24733.1|ACT_DICVI
12079	499	C	T	Locus_29586.0|BlastHit|gi|2492667|sp|Q24733.1|ACT_DICVI
12079	759	T	C	Locus_29586.0|BlastHit|gi|2492667|sp|Q24733.1|ACT_DICVI
12080	267	G	A	Locus_29586.0|BlastHit|gi|41016788|sp|O93400.1|ACTB_XENLA
12081	271	A	G	Locus_29586.1|BlastHit|gi|88984093|sp|Q64676.2|CGT_MOUSE
12084	1704	A	G	Locus_29587.0|BlastHit|gi|82081524|sp|Q5ZJA3.1|CDR2_CHICK
12084	4212	T	C	Locus_29587.0|BlastHit|gi|82081524|sp|Q5ZJA3.1|CDR2_CHICK
12084	4678	G	T	Locus_29587.0|BlastHit|gi|82081524|sp|Q5ZJA3.1|CDR2_CHICK
12087	1357	G	A	Locus_29592.0|BlastHit|gi|25090702|sp|O46040.3|MSTAA_DROME
12089	1142	T	C	Locus_29594.0|BlastHit|gi|150438887|sp|Q9CX98.2|CP2U1_MOUSE
12089	1252	A	G	Locus_29594.0|BlastHit|gi|150438887|sp|Q9CX98.2|CP2U1_MOUSE
12089	1432	A	G	Locus_29594.0|BlastHit|gi|150438887|sp|Q9CX98.2|CP2U1_MOUSE
12089	1699	C	T	Locus_29594.0|BlastHit|gi|150438887|sp|Q9CX98.2|CP2U1_MOUSE
12089	445	G	T	Locus_29594.0|BlastHit|gi|150438887|sp|Q9CX98.2|CP2U1_MOUSE
12089	451	A	G	Locus_29594.0|BlastHit|gi|150438887|sp|Q9CX98.2|CP2U1_MOUSE
12089	499	G	A	Locus_29594.0|BlastHit|gi|150438887|sp|Q9CX98.2|CP2U1_MOUSE
12095	1009	G	A	Locus_29600.0|BlastHit|gi|357529509|sp|Q04446.3|GLGB_HUMAN
12095	1116	G	A	Locus_29600.0|BlastHit|gi|357529509|sp|Q04446.3|GLGB_HUMAN
12095	1221	T	C	Locus_29600.0|BlastHit|gi|357529509|sp|Q04446.3|GLGB_HUMAN
12095	185	A	T	Locus_29600.0|BlastHit|gi|357529509|sp|Q04446.3|GLGB_HUMAN
12095	2167	G	A	Locus_29600.0|BlastHit|gi|357529509|sp|Q04446.3|GLGB_HUMAN
12095	2428	A	C	Locus_29600.0|BlastHit|gi|357529509|sp|Q04446.3|GLGB_HUMAN
12095	3313	G	A	Locus_29600.0|BlastHit|gi|357529509|sp|Q04446.3|GLGB_HUMAN
12095	3828	T	G	Locus_29600.0|BlastHit|gi|357529509|sp|Q04446.3|GLGB_HUMAN
12095	4064	A	C	Locus_29600.0|BlastHit|gi|357529509|sp|Q04446.3|GLGB_HUMAN
12095	617	G	A	Locus_29600.0|BlastHit|gi|357529509|sp|Q04446.3|GLGB_HUMAN
12100	1183	G	A	Locus_29602.0|BlastHit|gi|73620946|sp|Q9ERQ8.2|CAH7_MOUSE
12100	589	G	A	Locus_29602.0|BlastHit|gi|73620946|sp|Q9ERQ8.2|CAH7_MOUSE
12100	59	G	A	Locus_29602.0|BlastHit|gi|73620946|sp|Q9ERQ8.2|CAH7_MOUSE
12100	970	T	C,A	Locus_29602.0|BlastHit|gi|73620946|sp|Q9ERQ8.2|CAH7_MOUSE
12107	1130	G	A	Locus_29609.0|BlastHit|gi|116242770|sp|Q58DQ5.3|RT09_BOVIN
12107	506	A	G	Locus_29609.0|BlastHit|gi|116242770|sp|Q58DQ5.3|RT09_BOVIN
12162	504	G	A	Locus_29634.1|BlastHit|gi|257096631|sp|Q6P963.2|GLO2_DANRE
12162	621	C	T	Locus_29634.1|BlastHit|gi|257096631|sp|Q6P963.2|GLO2_DANRE
12162	794	G	C	Locus_29634.1|BlastHit|gi|257096631|sp|Q6P963.2|GLO2_DANRE
12168	396	G	C	Locus_29638.0|BlastHit|gi|363805411|sp|B7PRF6.1|MTND_IXOSC
12175	293	C	A	Locus_29649.0|BlastHit|gi|20139923|sp|Q9D826.1|SOX_MOUSE
12180	1979	G	A	Locus_29660.0|BlastHit|gi|82179047|sp|Q5FW42.1|DCTN2_XENTR
12180	534	C	T	Locus_29660.0|BlastHit|gi|82179047|sp|Q5FW42.1|DCTN2_XENTR
12180	552	T	G	Locus_29660.0|BlastHit|gi|82179047|sp|Q5FW42.1|DCTN2_XENTR
12180	744	A	G	Locus_29660.0|BlastHit|gi|82179047|sp|Q5FW42.1|DCTN2_XENTR
12180	831	G	A	Locus_29660.0|BlastHit|gi|82179047|sp|Q5FW42.1|DCTN2_XENTR
12180	903	G	A	Locus_29660.0|BlastHit|gi|82179047|sp|Q5FW42.1|DCTN2_XENTR
12210	714	T	C	Locus_29683.0|BlastHit|gi|357580499|sp|D3ZTX0.1|TMED7_RAT
12213	141	G	C	Locus_29685.0|BlastHit|gi|61211744|sp|Q5R699.1|ATG4A_PONAB
12216	2927	G	T	Locus_29689.0|BlastHit|gi|68565472|sp|Q6DI48.1|DLLA_DANRE
12216	362	G	T	Locus_29689.0|BlastHit|gi|68565472|sp|Q6DI48.1|DLLA_DANRE
12224	179	A	T	Locus_29698.0|BlastHit|gi|110278996|sp|Q2NL00.3|GSTT1_BOVIN
12224	419	G	A	Locus_29698.0|BlastHit|gi|110278996|sp|Q2NL00.3|GSTT1_BOVIN
12224	487	T	A	Locus_29698.0|BlastHit|gi|110278996|sp|Q2NL00.3|GSTT1_BOVIN
12224	611	G	A	Locus_29698.0|BlastHit|gi|110278996|sp|Q2NL00.3|GSTT1_BOVIN
12224	875	A	G	Locus_29698.0|BlastHit|gi|110278996|sp|Q2NL00.3|GSTT1_BOVIN
12240	5651	T	G	Locus_29708.0|BlastHit|gi|68052351|sp|Q8CJ96.1|RASF8_MOUSE
1224	614	A	G	Locus_8567.0|BlastHit|gi|13626300|sp|Q9NAH4.1|DENR_CAEEL
12279	234	T	C	Locus_29739.1|BlastHit|gi|209572837|sp|P85838.1|FRIH_PAGBE
12287	2027	G	A	Locus_29743.0|BlastHit|gi|387935426|sp|Q0IHF9.2|SARAF_XENLA
12288	5237	G	C	Locus_29744.2|BlastHit|gi|2506807|sp|P15215.2|LAMC1_DROME
1229	236	T	C	Locus_8606.0|BlastHit|gi|2492671|sp|Q25381.1|ACTM_LYTPI
12300	24	C	T	Locus_29751.0|BlastHit|gi|129688|sp|P21902.1|PCE_TACTR
12302	668	C	A	Locus_29752.0|BlastHit|gi|1352712|sp|P05120.2|PAI2_HUMAN
12302	698	C	G	Locus_29752.0|BlastHit|gi|1352712|sp|P05120.2|PAI2_HUMAN
12307	1359	G	A	Locus_29757.0|BlastHit|gi|75055208|sp|Q5RDZ2.3|CRYL1_PONAB
12337	1261	A	T	Locus_29767.0|BlastHit|gi|14917099|sp|Q93034.4|CUL5_HUMAN
12337	312	T	C	Locus_29767.0|BlastHit|gi|14917099|sp|Q93034.4|CUL5_HUMAN
12337	735	C	T	Locus_29767.0|BlastHit|gi|14917099|sp|Q93034.4|CUL5_HUMAN
12337	840	C	T	Locus_29767.0|BlastHit|gi|14917099|sp|Q93034.4|CUL5_HUMAN
12341	422	A	T,G	Locus_29773.0|BlastHit|gi|56749669|sp|Q6RI86.1|TRPA1_RAT
12364	3510	T	C	Locus_29776.0|BlastHit|gi|187665002|sp|A6NF79.3|ZN734_HUMAN
12364	3526	C	T	Locus_29776.0|BlastHit|gi|187665002|sp|A6NF79.3|ZN734_HUMAN
12400	1861	G	A	Locus_29787.0|BlastHit|gi|59797979|sp|Q9W092.1|CHIT2_DROME
12400	1870	G	C	Locus_29787.0|BlastHit|gi|59797979|sp|Q9W092.1|CHIT2_DROME
12408	1762	C	G	Locus_29796.0|BlastHit|gi|12644042|sp|O02649.3|CH60_DROME
12408	1834	C	T	Locus_29796.0|BlastHit|gi|12644042|sp|O02649.3|CH60_DROME
12408	2008	C	T	Locus_29796.0|BlastHit|gi|12644042|sp|O02649.3|CH60_DROME
12443	1336	G	A	Locus_29809.0|BlastHit|gi|1168287|sp|P45953.1|ACADV_RAT
12443	147	C	T	Locus_29809.0|BlastHit|gi|1168287|sp|P45953.1|ACADV_RAT
12443	1558	T	C	Locus_29809.0|BlastHit|gi|1168287|sp|P45953.1|ACADV_RAT
12443	1879	C	T	Locus_29809.0|BlastHit|gi|1168287|sp|P45953.1|ACADV_RAT
12443	1948	G	A	Locus_29809.0|BlastHit|gi|1168287|sp|P45953.1|ACADV_RAT
12443	2482	T	C	Locus_29809.0|BlastHit|gi|1168287|sp|P45953.1|ACADV_RAT
12443	507	T	A	Locus_29809.0|BlastHit|gi|1168287|sp|P45953.1|ACADV_RAT
12443	541	G	A	Locus_29809.0|BlastHit|gi|1168287|sp|P45953.1|ACADV_RAT
12443	632	G	T	Locus_29809.0|BlastHit|gi|1168287|sp|P45953.1|ACADV_RAT
12443	633	A	G	Locus_29809.0|BlastHit|gi|1168287|sp|P45953.1|ACADV_RAT
12443	758	A	T	Locus_29809.0|BlastHit|gi|1168287|sp|P45953.1|ACADV_RAT
12462	1725	C	T	Locus_29826.0|BlastHit|gi|62287010|sp|Q5RI56.2|OPTN_DANRE
12462	197	A	G	Locus_29826.0|BlastHit|gi|62287010|sp|Q5RI56.2|OPTN_DANRE
12462	209	A	C	Locus_29826.0|BlastHit|gi|62287010|sp|Q5RI56.2|OPTN_DANRE
12462	245	A	T	Locus_29826.0|BlastHit|gi|62287010|sp|Q5RI56.2|OPTN_DANRE
12462	345	C	A	Locus_29826.0|BlastHit|gi|62287010|sp|Q5RI56.2|OPTN_DANRE
12462	459	C	T	Locus_29826.0|BlastHit|gi|62287010|sp|Q5RI56.2|OPTN_DANRE
12462	651	C	A	Locus_29826.0|BlastHit|gi|62287010|sp|Q5RI56.2|OPTN_DANRE
12463	536	T	A,G	Locus_29827.1|BlastHit|gi|110815875|sp|Q3SYU1.1|NOC2L_BOVIN
12463	668	G	A	Locus_29827.1|BlastHit|gi|110815875|sp|Q3SYU1.1|NOC2L_BOVIN
12474	949	A	G	Locus_29836.0|BlastHit|gi|77416862|sp|P58854.2|GCP3_MOUSE
12475	898	A	G	Locus_29840.0|BlastHit|gi|74871417|sp|Q9VWV8.1|NOSIP_DROME
12493	1068	T	C	Locus_29859.0|BlastHit|gi|81914662|sp|Q8K354.1|CBR3_MOUSE
12493	1125	A	G	Locus_29859.0|BlastHit|gi|81914662|sp|Q8K354.1|CBR3_MOUSE
12493	1359	C	T	Locus_29859.0|BlastHit|gi|81914662|sp|Q8K354.1|CBR3_MOUSE
12493	1618	T	G	Locus_29859.0|BlastHit|gi|81914662|sp|Q8K354.1|CBR3_MOUSE
12501	1026	A	T	Locus_29866.0|BlastHit|gi|3122065|sp|O35459.1|ECH1_MOUSE
12501	1125	G	A	Locus_29866.0|BlastHit|gi|3122065|sp|O35459.1|ECH1_MOUSE
12501	1213	T	A	Locus_29866.0|BlastHit|gi|3122065|sp|O35459.1|ECH1_MOUSE
12501	1246	T	A	Locus_29866.0|BlastHit|gi|3122065|sp|O35459.1|ECH1_MOUSE
12501	303	G	A	Locus_29866.0|BlastHit|gi|3122065|sp|O35459.1|ECH1_MOUSE
12501	545	G	A	Locus_29866.0|BlastHit|gi|3122065|sp|O35459.1|ECH1_MOUSE
12501	603	C	T	Locus_29866.0|BlastHit|gi|3122065|sp|O35459.1|ECH1_MOUSE
12501	862	A	T	Locus_29866.0|BlastHit|gi|3122065|sp|O35459.1|ECH1_MOUSE
12501	893	C	T	Locus_29866.0|BlastHit|gi|3122065|sp|O35459.1|ECH1_MOUSE
12501	921	G	C,T	Locus_29866.0|BlastHit|gi|3122065|sp|O35459.1|ECH1_MOUSE
12558	250	G	A	Locus_29890.1|BlastHit|gi|152143027|sp|Q4VC12.2|MSS51_HUMAN
12564	1648	G	A	Locus_29892.0|BlastHit|gi|259016371|sp|Q5JR59.3|MTUS2_HUMAN
12564	1857	A	G	Locus_29892.0|BlastHit|gi|259016371|sp|Q5JR59.3|MTUS2_HUMAN
12564	2004	T	C	Locus_29892.0|BlastHit|gi|259016371|sp|Q5JR59.3|MTUS2_HUMAN
12564	2671	C	A	Locus_29892.0|BlastHit|gi|259016371|sp|Q5JR59.3|MTUS2_HUMAN
12564	2931	T	A	Locus_29892.0|BlastHit|gi|259016371|sp|Q5JR59.3|MTUS2_HUMAN
12564	3061	G	A	Locus_29892.0|BlastHit|gi|259016371|sp|Q5JR59.3|MTUS2_HUMAN
12564	5374	G	A	Locus_29892.0|BlastHit|gi|259016371|sp|Q5JR59.3|MTUS2_HUMAN
12564	5719	G	A	Locus_29892.0|BlastHit|gi|259016371|sp|Q5JR59.3|MTUS2_HUMAN
12570	1797	G	T	Locus_29897.0|BlastHit|gi|325511408|sp|Q9Y493.4|ZAN_HUMAN
12594	692	C	T	Locus_29911.0|BlastHit|gi|82184854|sp|Q6INS3.1|TC35A_XENLA
12597	1609	T	C	Locus_29915.0|BlastHit|gi|71153167|sp|Q94913.2|REG5_DROME
12597	1742	A	G	Locus_29915.0|BlastHit|gi|71153167|sp|Q94913.2|REG5_DROME
12597	945	G	A	Locus_29915.0|BlastHit|gi|71153167|sp|Q94913.2|REG5_DROME
12597	968	C	T	Locus_29915.0|BlastHit|gi|71153167|sp|Q94913.2|REG5_DROME
12603	1115	C	T	Locus_29924.0|BlastHit|gi|76363525|sp|P83501.2|MSTAB_DROME
12603	1472	G	A	Locus_29924.0|BlastHit|gi|76363525|sp|P83501.2|MSTAB_DROME
12603	1490	G	A	Locus_29924.0|BlastHit|gi|76363525|sp|P83501.2|MSTAB_DROME
12603	1974	C	T	Locus_29924.0|BlastHit|gi|76363525|sp|P83501.2|MSTAB_DROME
12603	263	T	C	Locus_29924.0|BlastHit|gi|76363525|sp|P83501.2|MSTAB_DROME
12603	953	T	C	Locus_29924.0|BlastHit|gi|76363525|sp|P83501.2|MSTAB_DROME
12603	957	C	T	Locus_29924.0|BlastHit|gi|76363525|sp|P83501.2|MSTAB_DROME
12614	199	A	C	Locus_29938.1|BlastHit|gi|74751626|sp|Q8WYK2.1|JDP2_HUMAN
12616	1145	G	A	Locus_29940.4|BlastHit|gi|3914301|sp|O62698.2|PGH2_BOVIN
12616	1227	A	G	Locus_29940.4|BlastHit|gi|3914301|sp|O62698.2|PGH2_BOVIN
12616	1383	A	G	Locus_29940.4|BlastHit|gi|3914301|sp|O62698.2|PGH2_BOVIN
12621	107	G	T	Locus_29941.4|BlastHit|gi|1729808|sp|P49846.1|TAF5_DROME
12630	2625	G	A	Locus_29948.0|BlastHit|gi|46577504|sp|Q8NI36.1|WDR36_HUMAN
12632	1219	T	C	Locus_29951.0|BlastHit|gi|82182635|sp|Q6DED0.1|TR1L1_XENLA
12632	2452	T	C	Locus_29951.0|BlastHit|gi|82182635|sp|Q6DED0.1|TR1L1_XENLA
12639	254	T	C	Locus_29961.0|BlastHit|gi|76363312|sp|Q5M9F1.1|RBM34_RAT
12639	674	A	G	Locus_29961.0|BlastHit|gi|76363312|sp|Q5M9F1.1|RBM34_RAT
12639	809	G	T	Locus_29961.0|BlastHit|gi|76363312|sp|Q5M9F1.1|RBM34_RAT
12642	7095	T	C	Locus_29964.0|BlastHit|gi|17367176|sp|Q9VWE0.1|DOME_DROME
12642	7423	A	T	Locus_29964.0|BlastHit|gi|17367176|sp|Q9VWE0.1|DOME_DROME
12643	1014	G	A	Locus_29964.1|BlastHit|gi|121990664|sp|Q297K8.1|JAGN_DROPS
12643	1325	C	T	Locus_29964.1|BlastHit|gi|121990664|sp|Q297K8.1|JAGN_DROPS
12643	1326	T	G	Locus_29964.1|BlastHit|gi|121990664|sp|Q297K8.1|JAGN_DROPS
12643	1672	G	A	Locus_29964.1|BlastHit|gi|121990664|sp|Q297K8.1|JAGN_DROPS
12643	2335	T	C	Locus_29964.1|BlastHit|gi|121990664|sp|Q297K8.1|JAGN_DROPS
12643	2373	G	A	Locus_29964.1|BlastHit|gi|121990664|sp|Q297K8.1|JAGN_DROPS
12643	2652	G	A	Locus_29964.1|BlastHit|gi|121990664|sp|Q297K8.1|JAGN_DROPS
12643	3030	C	T	Locus_29964.1|BlastHit|gi|121990664|sp|Q297K8.1|JAGN_DROPS
12643	59	C	T	Locus_29964.1|BlastHit|gi|121990664|sp|Q297K8.1|JAGN_DROPS
12651	1067	G	A	Locus_29970.1|BlastHit|gi|384872699|sp|P83088.4|FUCTC_DROME
12651	1109	T	C,G	Locus_29970.1|BlastHit|gi|384872699|sp|P83088.4|FUCTC_DROME
12651	890	T	C	Locus_29970.1|BlastHit|gi|384872699|sp|P83088.4|FUCTC_DROME
12652	1059	A	G	Locus_29971.0|BlastHit|gi|31076831|sp|Q8WUM4.1|PDC6I_HUMAN
12652	1083	T	C	Locus_29971.0|BlastHit|gi|31076831|sp|Q8WUM4.1|PDC6I_HUMAN
12654	105	A	G	Locus_29972.0|BlastHit|gi|52783230|sp|Q8BJY1.4|PSMD5_MOUSE
12654	1997	C	T	Locus_29972.0|BlastHit|gi|52783230|sp|Q8BJY1.4|PSMD5_MOUSE
12654	2006	G	A	Locus_29972.0|BlastHit|gi|52783230|sp|Q8BJY1.4|PSMD5_MOUSE
12678	1408	T	C	Locus_29986.0|BlastHit|gi|81917075|sp|Q9D706.1|RPAP3_MOUSE
12682	285	G	A	Locus_29990.1|BlastHit|gi|3915086|sp|Q25008.1|TBA1_HOMAM
12682	534	G	A	Locus_29990.1|BlastHit|gi|3915086|sp|Q25008.1|TBA1_HOMAM
12682	543	G	C,A	Locus_29990.1|BlastHit|gi|3915086|sp|Q25008.1|TBA1_HOMAM
12684	629	C	A	Locus_29990.1|BlastHit|gi|135396|sp|P06603.1|TBA1_DROME
12686	470	G	A	Locus_29990.1|BlastHit|gi|3915094|sp|Q94572.1|TBA3_HOMAM
12727	4144	G	C	Locus_30020.0|BlastHit|gi|166215019|sp|Q99PP2.2|ZN318_MOUSE
12727	4251	G	A	Locus_30020.0|BlastHit|gi|166215019|sp|Q99PP2.2|ZN318_MOUSE
12728	1373	A	G	Locus_30021.0|BlastHit|gi|24418679|sp|Q9V8K2.2|EXOC3_DROME
12728	1379	C	T	Locus_30021.0|BlastHit|gi|24418679|sp|Q9V8K2.2|EXOC3_DROME
12728	1802	G	C	Locus_30021.0|BlastHit|gi|24418679|sp|Q9V8K2.2|EXOC3_DROME
12734	1323	A	T	Locus_30030.0|BlastHit|gi|10720056|sp|Q9V427.1|INX2_DROME
12734	1443	T	C	Locus_30030.0|BlastHit|gi|10720056|sp|Q9V427.1|INX2_DROME
12734	1886	G	A	Locus_30030.0|BlastHit|gi|10720056|sp|Q9V427.1|INX2_DROME
12738	3009	T	C	Locus_30034.0|BlastHit|gi|82231213|sp|Q5F3X4.1|U5S1_CHICK
12747	1147	T	C	Locus_30043.0|BlastHit|gi|729723|sp|P40855.1|PEX19_HUMAN
12749	1216	G	A	Locus_30046.0|BlastHit|gi|74835253|sp|Q27081.1|CFB_TACTR
12749	367	C	A	Locus_30046.0|BlastHit|gi|74835253|sp|Q27081.1|CFB_TACTR
12749	544	T	C	Locus_30046.0|BlastHit|gi|74835253|sp|Q27081.1|CFB_TACTR
12749	793	T	A	Locus_30046.0|BlastHit|gi|74835253|sp|Q27081.1|CFB_TACTR
12754	1118	G	A	Locus_30050.0|BlastHit|gi|62510571|sp|Q21086.1|GNL3_CAEEL
12754	1235	T	C	Locus_30050.0|BlastHit|gi|62510571|sp|Q21086.1|GNL3_CAEEL
12754	1286	C	T	Locus_30050.0|BlastHit|gi|62510571|sp|Q21086.1|GNL3_CAEEL
12754	218	T	C	Locus_30050.0|BlastHit|gi|62510571|sp|Q21086.1|GNL3_CAEEL
12754	341	G	A	Locus_30050.0|BlastHit|gi|62510571|sp|Q21086.1|GNL3_CAEEL
12756	1221	G	A	Locus_30051.0|BlastHit|gi|66773787|sp|Q6DGG0.3|PPID_RAT
12756	1794	C	T	Locus_30051.0|BlastHit|gi|66773787|sp|Q6DGG0.3|PPID_RAT
12762	2477	G	A	Locus_30057.1|BlastHit|gi|269849656|sp|O75533.3|SF3B1_HUMAN
12762	4630	G	A	Locus_30057.1|BlastHit|gi|269849656|sp|O75533.3|SF3B1_HUMAN
12762	4831	G	A	Locus_30057.1|BlastHit|gi|269849656|sp|O75533.3|SF3B1_HUMAN
12762	5025	G	A	Locus_30057.1|BlastHit|gi|269849656|sp|O75533.3|SF3B1_HUMAN
12762	5265	A	C	Locus_30057.1|BlastHit|gi|269849656|sp|O75533.3|SF3B1_HUMAN
12762	5399	T	C	Locus_30057.1|BlastHit|gi|269849656|sp|O75533.3|SF3B1_HUMAN
12771	2298	G	A	Locus_30072.0|BlastHit|gi|82184932|sp|Q6IP59.1|CTL2_XENLA
12771	2352	C	T	Locus_30072.0|BlastHit|gi|82184932|sp|Q6IP59.1|CTL2_XENLA
12771	2428	G	A	Locus_30072.0|BlastHit|gi|82184932|sp|Q6IP59.1|CTL2_XENLA
12771	269	G	A	Locus_30072.0|BlastHit|gi|82184932|sp|Q6IP59.1|CTL2_XENLA
12771	550	T	A	Locus_30072.0|BlastHit|gi|82184932|sp|Q6IP59.1|CTL2_XENLA
12782	1543	C	T	Locus_30087.0|BlastHit|gi|12644139|sp|P17276.3|PH4H_DROME
12782	1579	G	A	Locus_30087.0|BlastHit|gi|12644139|sp|P17276.3|PH4H_DROME
12782	1580	C	A	Locus_30087.0|BlastHit|gi|12644139|sp|P17276.3|PH4H_DROME
12789	1526	G	A	Locus_30099.0|BlastHit|gi|118572833|sp|Q3ZBD2.1|ARP10_BOVIN
12789	2537	C	T	Locus_30099.0|BlastHit|gi|118572833|sp|Q3ZBD2.1|ARP10_BOVIN
12789	697	G	A	Locus_30099.0|BlastHit|gi|118572833|sp|Q3ZBD2.1|ARP10_BOVIN
12789	799	C	T	Locus_30099.0|BlastHit|gi|118572833|sp|Q3ZBD2.1|ARP10_BOVIN
12812	2901	T	A	Locus_30105.0|BlastHit|gi|20138067|sp|Q9UHB6.1|LIMA1_HUMAN
12829	564	C	G	Locus_30113.0|BlastHit|gi|353558875|sp|E0VVF6.1|ITPA_PEDHC
12829	586	G	A	Locus_30113.0|BlastHit|gi|353558875|sp|E0VVF6.1|ITPA_PEDHC
12829	635	G	C	Locus_30113.0|BlastHit|gi|353558875|sp|E0VVF6.1|ITPA_PEDHC
12829	894	C	T	Locus_30113.0|BlastHit|gi|353558875|sp|E0VVF6.1|ITPA_PEDHC
12832	348	C	T	Locus_30118.0|BlastHit|gi|117330|sp|P80007.1|CRA2_HOMGA
12834	346	C	T	Locus_30118.0|BlastHit|gi|117330|sp|P80007.1|CRA2_HOMGA
12834	695	G	A	Locus_30118.0|BlastHit|gi|117330|sp|P80007.1|CRA2_HOMGA
12845	863	A	T	Locus_30125.0|BlastHit|gi|212276491|sp|Q9UPU5.3|UBP24_HUMAN
12855	1078	C	T	Locus_30128.3|BlastHit|gi|728955|sp|Q07817.1|B2CL1_HUMAN
12862	1075	C	T	Locus_30132.1|BlastHit|gi|122065151|sp|Q9NZK5.2|CECR1_HUMAN
12862	604	T	C	Locus_30132.1|BlastHit|gi|122065151|sp|Q9NZK5.2|CECR1_HUMAN
12862	862	C	A	Locus_30132.1|BlastHit|gi|122065151|sp|Q9NZK5.2|CECR1_HUMAN
12864	223	A	T	Locus_30133.0|BlastHit|gi|2492602|sp|Q17320.1|WHITE_CERCA
12864	652	T	G	Locus_30133.0|BlastHit|gi|2492602|sp|Q17320.1|WHITE_CERCA
12864	727	T	C	Locus_30133.0|BlastHit|gi|2492602|sp|Q17320.1|WHITE_CERCA
12864	728	G	A	Locus_30133.0|BlastHit|gi|2492602|sp|Q17320.1|WHITE_CERCA
12880	3197	A	C	Locus_30144.0|BlastHit|gi|148887071|sp|Q9NW15.2|ANO10_HUMAN
12880	3663	A	G	Locus_30144.0|BlastHit|gi|148887071|sp|Q9NW15.2|ANO10_HUMAN
12880	3679	T	C	Locus_30144.0|BlastHit|gi|148887071|sp|Q9NW15.2|ANO10_HUMAN
12881	1428	C	T	Locus_30145.1|BlastHit|gi|62510601|sp|Q60HF9.1|FUMH_MACFA
12881	1582	G	T	Locus_30145.1|BlastHit|gi|62510601|sp|Q60HF9.1|FUMH_MACFA
12881	1602	T	C	Locus_30145.1|BlastHit|gi|62510601|sp|Q60HF9.1|FUMH_MACFA
12881	1774	G	A	Locus_30145.1|BlastHit|gi|62510601|sp|Q60HF9.1|FUMH_MACFA
12881	675	C	T	Locus_30145.1|BlastHit|gi|62510601|sp|Q60HF9.1|FUMH_MACFA
12881	714	G	A	Locus_30145.1|BlastHit|gi|62510601|sp|Q60HF9.1|FUMH_MACFA
12881	720	T	A	Locus_30145.1|BlastHit|gi|62510601|sp|Q60HF9.1|FUMH_MACFA
12881	894	C	T	Locus_30145.1|BlastHit|gi|62510601|sp|Q60HF9.1|FUMH_MACFA
12892	1458	C	T	Locus_30150.0|BlastHit|gi|11386961|sp|O18638.1|OAF_DROVI
12893	1282	G	A	Locus_30152.0|BlastHit|gi|74872611|sp|Q9W420.1|SPT6H_DROME
12893	898	G	A	Locus_30152.0|BlastHit|gi|74872611|sp|Q9W420.1|SPT6H_DROME
12894	1363	T	C	Locus_30152.0|BlastHit|gi|158939140|sp|P36915.2|GNL1_HUMAN
12894	1444	T	A	Locus_30152.0|BlastHit|gi|158939140|sp|P36915.2|GNL1_HUMAN
12902	1273	C	T	Locus_30156.0|BlastHit|gi|78099319|sp|Q9JLJ2.1|AL9A1_MOUSE
12902	1657	T	C	Locus_30156.0|BlastHit|gi|78099319|sp|Q9JLJ2.1|AL9A1_MOUSE
12902	892	A	G	Locus_30156.0|BlastHit|gi|78099319|sp|Q9JLJ2.1|AL9A1_MOUSE
12903	809	T	C	Locus_30157.0|BlastHit|gi|585618|sp|P27298.3|OPDA_ECOLI
12906	2995	T	A	Locus_30159.0|BlastHit|gi|82196770|sp|Q5U597.1|SKA2B_XENLA
12906	3499	T	C	Locus_30159.0|BlastHit|gi|82196770|sp|Q5U597.1|SKA2B_XENLA
12916	1064	T	G	Locus_30165.0|BlastHit|gi|20532309|sp|Q9VNA4.1|Y1161_DROME
12916	1295	A	T	Locus_30165.0|BlastHit|gi|20532309|sp|Q9VNA4.1|Y1161_DROME
12918	230	C	A	Locus_30167.0|BlastHit|gi|1170470|sp|P41436.1|IAP_GVCPM
12923	133	C	T	Locus_30170.1|BlastHit|gi|76363525|sp|P83501.2|MSTAB_DROME
12923	465	C	T	Locus_30170.1|BlastHit|gi|76363525|sp|P83501.2|MSTAB_DROME
12923	588	C	T	Locus_30170.1|BlastHit|gi|76363525|sp|P83501.2|MSTAB_DROME
12923	591	T	C	Locus_30170.1|BlastHit|gi|76363525|sp|P83501.2|MSTAB_DROME
12923	708	C	T	Locus_30170.1|BlastHit|gi|76363525|sp|P83501.2|MSTAB_DROME
12924	1747	A	T	Locus_30171.0|BlastHit|gi|147639860|sp|Q4V832.2|AP4AT_XENLA
12924	2069	C	T	Locus_30171.0|BlastHit|gi|147639860|sp|Q4V832.2|AP4AT_XENLA
12943	2062	G	C	Locus_30190.0|BlastHit|gi|68066237|sp|Q6H1V1.1|BEST3_MOUSE
12943	2396	T	G	Locus_30190.0|BlastHit|gi|68066237|sp|Q6H1V1.1|BEST3_MOUSE
12991	512	G	C	Locus_30226.0|BlastHit|gi|75019729|sp|Q95RI5.1|FAXC_DROME
12991	564	A	C	Locus_30226.0|BlastHit|gi|75019729|sp|Q95RI5.1|FAXC_DROME
12991	594	G	A	Locus_30226.0|BlastHit|gi|75019729|sp|Q95RI5.1|FAXC_DROME
13005	1060	T	G	Locus_30237.0|BlastHit|gi|115311845|sp|Q3T0G5.1|PROSC_BOVIN
13006	816	A	G	Locus_30239.0|BlastHit|gi|221271983|sp|B2DCR8.1|CTX_SEPES
13027	723	G	A	Locus_30258.0|BlastHit|gi|146291098|sp|P59015.2|VPS18_DANRE
13029	1184	G	T	Locus_30260.0|BlastHit|gi|82185344|sp|Q6NS26.1|CDKAL_XENLA
13049	1001	G	A	Locus_30271.0|BlastHit|gi|399248|sp|P30814.1|CHH_ARMVU
13049	857	G	A	Locus_30271.0|BlastHit|gi|399248|sp|P30814.1|CHH_ARMVU
13058	1296	G	T	Locus_30278.1|BlastHit|gi|1352731|sp|Q10057.1|PDI1_SCHPO
13062	1737	A	G	Locus_30282.0|BlastHit|gi|74870522|sp|Q9VR81.1|NAGA_DROME
13092	5919	T	C	Locus_30303.0|BlastHit|gi|417073|sp|Q03460.1|GLSN_MEDSA
13092	7019	C	A	Locus_30303.0|BlastHit|gi|417073|sp|Q03460.1|GLSN_MEDSA
13098	1171	A	G	Locus_30306.0|BlastHit|gi|145558904|sp|Q4V8C3.2|EMAL1_RAT
13098	389	A	C	Locus_30306.0|BlastHit|gi|145558904|sp|Q4V8C3.2|EMAL1_RAT
13098	736	T	C	Locus_30306.0|BlastHit|gi|145558904|sp|Q4V8C3.2|EMAL1_RAT
13098	822	A	G	Locus_30306.0|BlastHit|gi|145558904|sp|Q4V8C3.2|EMAL1_RAT
13112	4010	C	T	Locus_30315.0|BlastHit|gi|46396416|sp|Q8CCN1.1|NAL10_MOUSE
13117	1679	T	C	Locus_30323.0|BlastHit|gi|341941172|sp|P10493.2|NID1_MOUSE
13117	2558	A	G	Locus_30323.0|BlastHit|gi|341941172|sp|P10493.2|NID1_MOUSE
13117	698	C	T	Locus_30323.0|BlastHit|gi|341941172|sp|P10493.2|NID1_MOUSE
13156	288	A	G	Locus_30333.3|BlastHit|gi|76364109|sp|Q6NWZ9.1|CDO1_DANRE
13160	567	G	A	Locus_30337.0|BlastHit|gi|6225528|sp|O35586.1|IDI1_MESAU
13161	461	T	A	Locus_30338.0|BlastHit|gi|269849664|sp|O00160.3|MYO1F_HUMAN
13162	3122	A	C	Locus_30340.0|BlastHit|gi|75053124|sp|Q6XUZ5.1|IDHC_SHEEP
13177	114	C	T	Locus_30344.0|BlastHit|gi|122136015|sp|Q2KIG0.1|ETFD_BOVIN
13177	119	A	T	Locus_30344.0|BlastHit|gi|122136015|sp|Q2KIG0.1|ETFD_BOVIN
13177	1544	T	G,A	Locus_30344.0|BlastHit|gi|122136015|sp|Q2KIG0.1|ETFD_BOVIN
13177	460	T	A	Locus_30344.0|BlastHit|gi|122136015|sp|Q2KIG0.1|ETFD_BOVIN
13177	588	C	T	Locus_30344.0|BlastHit|gi|122136015|sp|Q2KIG0.1|ETFD_BOVIN
13177	596	G	T	Locus_30344.0|BlastHit|gi|122136015|sp|Q2KIG0.1|ETFD_BOVIN
13178	131	A	G	Locus_30346.0|BlastHit|gi|56404330|sp|Q767L0.1|ABCF1_PIG
13181	208	T	A	Locus_30351.0|BlastHit|gi|82182606|sp|Q6DE73.1|OGFD1_XENLA
13181	240	C	A	Locus_30351.0|BlastHit|gi|82182606|sp|Q6DE73.1|OGFD1_XENLA
13181	600	G	T	Locus_30351.0|BlastHit|gi|82182606|sp|Q6DE73.1|OGFD1_XENLA
13181	768	G	A	Locus_30351.0|BlastHit|gi|82182606|sp|Q6DE73.1|OGFD1_XENLA
13189	1484	C	T	Locus_30356.0|BlastHit|gi|1729925|sp|Q05187.1|TGMH_TACTR
13189	1984	G	A	Locus_30356.0|BlastHit|gi|1729925|sp|Q05187.1|TGMH_TACTR
13189	1993	G	A	Locus_30356.0|BlastHit|gi|1729925|sp|Q05187.1|TGMH_TACTR
13189	2020	G	A	Locus_30356.0|BlastHit|gi|1729925|sp|Q05187.1|TGMH_TACTR
13189	2117	T	A	Locus_30356.0|BlastHit|gi|1729925|sp|Q05187.1|TGMH_TACTR
13189	2221	G	A	Locus_30356.0|BlastHit|gi|1729925|sp|Q05187.1|TGMH_TACTR
13189	2320	C	T	Locus_30356.0|BlastHit|gi|1729925|sp|Q05187.1|TGMH_TACTR
13189	2568	C	T	Locus_30356.0|BlastHit|gi|1729925|sp|Q05187.1|TGMH_TACTR
13189	2570	G	A	Locus_30356.0|BlastHit|gi|1729925|sp|Q05187.1|TGMH_TACTR
13189	2671	G	T	Locus_30356.0|BlastHit|gi|1729925|sp|Q05187.1|TGMH_TACTR
13189	2688	C	T	Locus_30356.0|BlastHit|gi|1729925|sp|Q05187.1|TGMH_TACTR
13189	2721	C	T	Locus_30356.0|BlastHit|gi|1729925|sp|Q05187.1|TGMH_TACTR
13189	2894	T	A	Locus_30356.0|BlastHit|gi|1729925|sp|Q05187.1|TGMH_TACTR
13189	2923	T	C	Locus_30356.0|BlastHit|gi|1729925|sp|Q05187.1|TGMH_TACTR
13189	3144	C	T	Locus_30356.0|BlastHit|gi|1729925|sp|Q05187.1|TGMH_TACTR
13189	448	C	G,A	Locus_30356.0|BlastHit|gi|1729925|sp|Q05187.1|TGMH_TACTR
13189	883	C	A	Locus_30356.0|BlastHit|gi|1729925|sp|Q05187.1|TGMH_TACTR
13189	940	C	T	Locus_30356.0|BlastHit|gi|1729925|sp|Q05187.1|TGMH_TACTR
13190	132	G	A	Locus_30357.0|BlastHit|gi|123668|sp|P11501.3|HS90A_CHICK
13190	651	G	A	Locus_30357.0|BlastHit|gi|123668|sp|P11501.3|HS90A_CHICK
13192	563	C	T	Locus_30357.0|BlastHit|gi|123668|sp|P11501.3|HS90A_CHICK
13192	614	T	C	Locus_30357.0|BlastHit|gi|123668|sp|P11501.3|HS90A_CHICK
13192	968	G	C	Locus_30357.0|BlastHit|gi|123668|sp|P11501.3|HS90A_CHICK
13192	974	G	A	Locus_30357.0|BlastHit|gi|123668|sp|P11501.3|HS90A_CHICK
13193	640	C	A,G	Locus_30357.0|BlastHit|gi|123668|sp|P11501.3|HS90A_CHICK
13193	658	A	G	Locus_30357.0|BlastHit|gi|123668|sp|P11501.3|HS90A_CHICK
13194	784	T	C	Locus_30360.0|BlastHit|gi|71152087|sp|Q8BUV8.2|GP107_MOUSE
13194	982	A	G	Locus_30360.0|BlastHit|gi|71152087|sp|Q8BUV8.2|GP107_MOUSE
13202	1299	T	C	Locus_30365.0|BlastHit|gi|90101757|sp|Q8BTK5.2|SMYD4_MOUSE
13202	1659	G	A	Locus_30365.0|BlastHit|gi|90101757|sp|Q8BTK5.2|SMYD4_MOUSE
13202	2378	T	A	Locus_30365.0|BlastHit|gi|90101757|sp|Q8BTK5.2|SMYD4_MOUSE
13202	2388	C	T	Locus_30365.0|BlastHit|gi|90101757|sp|Q8BTK5.2|SMYD4_MOUSE
13204	204	T	C	Locus_30367.0|BlastHit|gi|122131713|sp|Q05B50.1|THG1_BOVIN
13204	212	T	G	Locus_30367.0|BlastHit|gi|122131713|sp|Q05B50.1|THG1_BOVIN
13218	1061	G	A	Locus_30374.0|BlastHit|gi|122114956|sp|Q0IE95.1|PESC_AEDAE
13218	1790	C	T	Locus_30374.0|BlastHit|gi|122114956|sp|Q0IE95.1|PESC_AEDAE
1321	1143	C	A	Locus_9191.0|BlastHit|gi|1171932|sp|P20740.3|OVOS_CHICK
1321	759	C	T	Locus_9191.0|BlastHit|gi|1171932|sp|P20740.3|OVOS_CHICK
13225	2459	T	C	Locus_30382.0|BlastHit|gi|122087179|sp|Q7JW12.1|TMX2_DROME
13225	852	C	T	Locus_30382.0|BlastHit|gi|122087179|sp|Q7JW12.1|TMX2_DROME
13232	1024	T	C	Locus_30388.0|BlastHit|gi|251757450|sp|P14543.3|NID1_HUMAN
13232	1033	C	T	Locus_30388.0|BlastHit|gi|251757450|sp|P14543.3|NID1_HUMAN
13232	472	G	C	Locus_30388.0|BlastHit|gi|251757450|sp|P14543.3|NID1_HUMAN
13232	814	A	G	Locus_30388.0|BlastHit|gi|251757450|sp|P14543.3|NID1_HUMAN
13232	961	A	G	Locus_30388.0|BlastHit|gi|251757450|sp|P14543.3|NID1_HUMAN
13233	5368	C	T	Locus_30390.0|BlastHit|gi|341942086|sp|Q8BU30.2|SYIC_MOUSE
13233	5557	A	G	Locus_30390.0|BlastHit|gi|341942086|sp|Q8BU30.2|SYIC_MOUSE
13233	5565	T	G	Locus_30390.0|BlastHit|gi|341942086|sp|Q8BU30.2|SYIC_MOUSE
13245	2790	G	T	Locus_30395.0|BlastHit|gi|71152945|sp|Q8BZ36.2|RINT1_MOUSE
13245	3759	T	A	Locus_30395.0|BlastHit|gi|71152945|sp|Q8BZ36.2|RINT1_MOUSE
13276	960	T	C	Locus_30407.0|BlastHit|gi|730326|sp|Q07326.1|PIGF_HUMAN
13281	1202	C	T	Locus_30410.0|BlastHit|gi|193806341|sp|Q9NHW7.2|AQP_AEDAE
13281	1373	G	A	Locus_30410.0|BlastHit|gi|193806341|sp|Q9NHW7.2|AQP_AEDAE
13281	1493	C	G	Locus_30410.0|BlastHit|gi|193806341|sp|Q9NHW7.2|AQP_AEDAE
13281	1955	A	T	Locus_30410.0|BlastHit|gi|193806341|sp|Q9NHW7.2|AQP_AEDAE
13281	419	C	T	Locus_30410.0|BlastHit|gi|193806341|sp|Q9NHW7.2|AQP_AEDAE
13281	674	G	T	Locus_30410.0|BlastHit|gi|193806341|sp|Q9NHW7.2|AQP_AEDAE
13281	75	C	T	Locus_30410.0|BlastHit|gi|193806341|sp|Q9NHW7.2|AQP_AEDAE
13293	2025	G	A	Locus_30427.0|BlastHit|gi|46396031|sp|Q9U572.1|CLOT_PENMO
13293	2046	G	A	Locus_30427.0|BlastHit|gi|46396031|sp|Q9U572.1|CLOT_PENMO
13299	1375	A	T	Locus_30435.0|BlastHit|gi|81884350|sp|Q68FS6.1|PYRD1_RAT
13299	1735	A	G	Locus_30435.0|BlastHit|gi|81884350|sp|Q68FS6.1|PYRD1_RAT
13299	548	T	C	Locus_30435.0|BlastHit|gi|81884350|sp|Q68FS6.1|PYRD1_RAT
13303	1158	G	A	Locus_30440.0|BlastHit|gi|122142572|sp|Q17QQ2.1|TPMT_BOVIN
13303	1815	G	A	Locus_30440.0|BlastHit|gi|122142572|sp|Q17QQ2.1|TPMT_BOVIN
13303	593	C	T	Locus_30440.0|BlastHit|gi|122142572|sp|Q17QQ2.1|TPMT_BOVIN
13304	1007	C	A	Locus_30441.0|BlastHit|gi|292495059|sp|Q15643.3|TRIPB_HUMAN
13319	1299	T	A	Locus_30449.0|BlastHit|gi|584956|sp|P37397.1|CNN3_RAT
13360	137	G	A	Locus_30461.0|BlastHit|gi|212276422|sp|P51689.2|ARSD_HUMAN
13360	323	T	C	Locus_30461.0|BlastHit|gi|212276422|sp|P51689.2|ARSD_HUMAN
13362	862	A	T	Locus_30462.2|BlastHit|gi|51702203|sp|Q9VAU9.1|ZN330_DROME
13365	4193	C	G	Locus_30465.0|BlastHit|gi|148887001|sp|Q7QJT4.4|PRIC1_ANOGA
13365	4195	G	C	Locus_30465.0|BlastHit|gi|148887001|sp|Q7QJT4.4|PRIC1_ANOGA
13365	4307	A	T	Locus_30465.0|BlastHit|gi|148887001|sp|Q7QJT4.4|PRIC1_ANOGA
13388	352	C	T	Locus_30478.0|BlastHit|gi|50400637|sp|Q9D8Z1.1|ASCC1_MOUSE
13389	2528	T	G	Locus_30479.0|BlastHit|gi|66773933|sp|Q91ZA3.2|PCCA_MOUSE
13416	1126	T	C	Locus_30489.0|BlastHit|gi|1729925|sp|Q05187.1|TGMH_TACTR
13416	220	G	A	Locus_30489.0|BlastHit|gi|1729925|sp|Q05187.1|TGMH_TACTR
13416	2626	C	T	Locus_30489.0|BlastHit|gi|1729925|sp|Q05187.1|TGMH_TACTR
13416	631	A	G	Locus_30489.0|BlastHit|gi|1729925|sp|Q05187.1|TGMH_TACTR
13419	1191	A	G	Locus_30492.0|BlastHit|gi|82201004|sp|Q6GM82.1|ALAT2_XENLA
13419	1377	C	T	Locus_30492.0|BlastHit|gi|82201004|sp|Q6GM82.1|ALAT2_XENLA
13419	2091	C	T	Locus_30492.0|BlastHit|gi|82201004|sp|Q6GM82.1|ALAT2_XENLA
13419	576	C	T	Locus_30492.0|BlastHit|gi|82201004|sp|Q6GM82.1|ALAT2_XENLA
13419	861	C	T	Locus_30492.0|BlastHit|gi|82201004|sp|Q6GM82.1|ALAT2_XENLA
13419	870	C	T	Locus_30492.0|BlastHit|gi|82201004|sp|Q6GM82.1|ALAT2_XENLA
13425	1084	G	A	Locus_30498.0|BlastHit|gi|54037163|sp|Q8BHN3.1|GANAB_MOUSE
13428	618	C	T	Locus_30501.0|BlastHit|gi|254763289|sp|O00418.2|EF2K_HUMAN
13431	1319	G	C	Locus_30504.0|BlastHit|gi|68837285|sp|P29147.2|BDH_RAT
13431	1606	G	A	Locus_30504.0|BlastHit|gi|68837285|sp|P29147.2|BDH_RAT
13431	553	A	G	Locus_30504.0|BlastHit|gi|68837285|sp|P29147.2|BDH_RAT
13431	628	T	A	Locus_30504.0|BlastHit|gi|68837285|sp|P29147.2|BDH_RAT
13431	629	G	T	Locus_30504.0|BlastHit|gi|68837285|sp|P29147.2|BDH_RAT
13431	698	G	A	Locus_30504.0|BlastHit|gi|68837285|sp|P29147.2|BDH_RAT
13435	1496	G	A	Locus_30511.1|BlastHit|gi|17865622|sp|Q9CQN1.1|TRAP1_MOUSE
13435	869	C	T	Locus_30511.1|BlastHit|gi|17865622|sp|Q9CQN1.1|TRAP1_MOUSE
13462	2123	T	C	Locus_30527.0|BlastHit|gi|22096372|sp|P48607.3|SPZ_DROME
13483	1478	T	A	Locus_30543.0|BlastHit|gi|25091203|sp|Q04164.2|SAS_DROME
13483	3629	A	G	Locus_30543.0|BlastHit|gi|25091203|sp|Q04164.2|SAS_DROME
13484	1172	T	C	Locus_30544.0|BlastHit|gi|1707994|sp|P35623.3|GLYC_SHEEP
13484	153	T	C	Locus_30544.0|BlastHit|gi|1707994|sp|P35623.3|GLYC_SHEEP
13484	1774	G	A	Locus_30544.0|BlastHit|gi|1707994|sp|P35623.3|GLYC_SHEEP
13484	1780	G	A	Locus_30544.0|BlastHit|gi|1707994|sp|P35623.3|GLYC_SHEEP
13484	1825	G	A	Locus_30544.0|BlastHit|gi|1707994|sp|P35623.3|GLYC_SHEEP
13484	1900	G	C,A,T	Locus_30544.0|BlastHit|gi|1707994|sp|P35623.3|GLYC_SHEEP
13485	234	T	C	Locus_30545.0|BlastHit|gi|1351115|sp|P47758.1|SRPRB_MOUSE
13485	690	A	G	Locus_30545.0|BlastHit|gi|1351115|sp|P47758.1|SRPRB_MOUSE
13488	5202	A	T	Locus_30550.0|BlastHit|gi|81882902|sp|Q5FWK3.1|RHG01_MOUSE
13490	1039	G	A	Locus_30553.0|BlastHit|gi|150387805|sp|Q6PHG8.2|RPA43_DANRE
13491	358	T	G	Locus_30553.0|BlastHit|gi|33112228|sp|Q9V7A7.1|GPAN1_DROME
13491	560	C	T	Locus_30553.0|BlastHit|gi|33112228|sp|Q9V7A7.1|GPAN1_DROME
13491	825	G	A	Locus_30553.0|BlastHit|gi|33112228|sp|Q9V7A7.1|GPAN1_DROME
13499	347	C	G	Locus_30560.0|BlastHit|gi|81914574|sp|Q8K135.1|K319L_MOUSE
13505	1342	C	T	Locus_30567.0|BlastHit|gi|146289861|sp|P46087.2|NOP2_HUMAN
13505	850	G	A	Locus_30567.0|BlastHit|gi|146289861|sp|P46087.2|NOP2_HUMAN
13511	1871	C	T	Locus_30576.0|BlastHit|gi|341941961|sp|Q9Z1M8.2|RED_MOUSE
13511	2564	T	A	Locus_30576.0|BlastHit|gi|341941961|sp|Q9Z1M8.2|RED_MOUSE
13512	579	A	T	Locus_30577.0|BlastHit|gi|342161829|sp|P0CZ23.1|ACOX3_ARATH
1351	38	C	G	Locus_9488.0|BlastHit|gi|110825729|sp|P05661.4|MYSA_DROME
13524	1715	T	C	Locus_30584.0|BlastHit|gi|32172424|sp|P11584.3|ITBX_DROME
13524	2255	T	G	Locus_30584.0|BlastHit|gi|32172424|sp|P11584.3|ITBX_DROME
13527	1162	C	T	Locus_30586.0|BlastHit|gi|25091335|sp|Q9VWP4.1|SUOX_DROME
13527	481	T	C	Locus_30586.0|BlastHit|gi|25091335|sp|Q9VWP4.1|SUOX_DROME
13530	5457	T	C	Locus_30588.0|BlastHit|gi|75026464|sp|Q9V895.1|AN32A_DROME
13547	1755	G	A	Locus_30599.0|BlastHit|gi|1351179|sp|P49696.1|SYVC_TAKRU
13547	1779	C	T	Locus_30599.0|BlastHit|gi|1351179|sp|P49696.1|SYVC_TAKRU
13549	1315	C	T	Locus_30599.1|BlastHit|gi|12643967|sp|Q9Z1Q9.1|SYVC_MOUSE
13555	3287	A	G	Locus_30605.2|BlastHit|gi|187471141|sp|A7RL75.1|TTC36_NEMVE
13572	157	A	G	Locus_30625.1|BlastHit|gi|124007195|sp|Q68CP4.2|HGNAT_HUMAN
13572	865	A	G	Locus_30625.1|BlastHit|gi|124007195|sp|Q68CP4.2|HGNAT_HUMAN
13574	322	G	A	Locus_30627.0|BlastHit|gi|123908673|sp|Q0IIY2.1|WSCD1_XENTR
13574	533	C	T	Locus_30627.0|BlastHit|gi|123908673|sp|Q0IIY2.1|WSCD1_XENTR
13575	1005	T	C	Locus_30628.0|BlastHit|gi|353558898|sp|Q6DGE9.2|UN45B_DANRE
13575	1085	C	T	Locus_30628.0|BlastHit|gi|353558898|sp|Q6DGE9.2|UN45B_DANRE
13575	1106	C	T	Locus_30628.0|BlastHit|gi|353558898|sp|Q6DGE9.2|UN45B_DANRE
13575	1511	C	T	Locus_30628.0|BlastHit|gi|353558898|sp|Q6DGE9.2|UN45B_DANRE
13575	166	T	A	Locus_30628.0|BlastHit|gi|353558898|sp|Q6DGE9.2|UN45B_DANRE
13575	181	T	G	Locus_30628.0|BlastHit|gi|353558898|sp|Q6DGE9.2|UN45B_DANRE
13575	2366	G	A	Locus_30628.0|BlastHit|gi|353558898|sp|Q6DGE9.2|UN45B_DANRE
13575	2677	G	T	Locus_30628.0|BlastHit|gi|353558898|sp|Q6DGE9.2|UN45B_DANRE
13575	520	T	C	Locus_30628.0|BlastHit|gi|353558898|sp|Q6DGE9.2|UN45B_DANRE
13575	525	A	C	Locus_30628.0|BlastHit|gi|353558898|sp|Q6DGE9.2|UN45B_DANRE
13575	71	T	C	Locus_30628.0|BlastHit|gi|353558898|sp|Q6DGE9.2|UN45B_DANRE
13575	879	G	A	Locus_30628.0|BlastHit|gi|353558898|sp|Q6DGE9.2|UN45B_DANRE
13608	3459	A	G	Locus_30633.0|BlastHit|gi|341942280|sp|Q923Q2.5|STA13_MOUSE
13608	4272	T	C	Locus_30633.0|BlastHit|gi|341942280|sp|Q923Q2.5|STA13_MOUSE
13620	411	G	T	Locus_30645.0|BlastHit|gi|417059|sp|Q04831.1|GLNA_PANAR
13623	211	A	T	Locus_30645.0|BlastHit|gi|417059|sp|Q04831.1|GLNA_PANAR
13623	417	T	C	Locus_30645.0|BlastHit|gi|417059|sp|Q04831.1|GLNA_PANAR
13633	2757	G	A	Locus_30647.0|BlastHit|gi|25453319|sp|Q8R5L3.1|VPS39_MOUSE
13633	2763	A	G	Locus_30647.0|BlastHit|gi|25453319|sp|Q8R5L3.1|VPS39_MOUSE
13633	3082	G	A	Locus_30647.0|BlastHit|gi|25453319|sp|Q8R5L3.1|VPS39_MOUSE
13641	1535	T	C	Locus_30652.1|BlastHit|gi|122091999|sp|Q0KHT7.1|Y2666_DROME
13641	2969	C	T	Locus_30652.1|BlastHit|gi|122091999|sp|Q0KHT7.1|Y2666_DROME
13643	267	C	T	Locus_30656.0|BlastHit|gi|122132319|sp|Q08DP0.1|PGM1_BOVIN
13658	1226	C	T	Locus_30659.0|BlastHit|gi|82135764|sp|Q8UVK2.1|SPT6H_DANRE
13658	4505	G	A	Locus_30659.0|BlastHit|gi|82135764|sp|Q8UVK2.1|SPT6H_DANRE
13658	794	C	T	Locus_30659.0|BlastHit|gi|82135764|sp|Q8UVK2.1|SPT6H_DANRE
13669	6591	C	A	Locus_30667.0|BlastHit|gi|74744979|sp|Q5T4S7.1|UBR4_HUMAN
13669	7230	G	T	Locus_30667.0|BlastHit|gi|74744979|sp|Q5T4S7.1|UBR4_HUMAN
13669	7479	T	G	Locus_30667.0|BlastHit|gi|74744979|sp|Q5T4S7.1|UBR4_HUMAN
13669	7725	C	T	Locus_30667.0|BlastHit|gi|74744979|sp|Q5T4S7.1|UBR4_HUMAN
13669	8502	A	G	Locus_30667.0|BlastHit|gi|74744979|sp|Q5T4S7.1|UBR4_HUMAN
13669	8646	C	T	Locus_30667.0|BlastHit|gi|74744979|sp|Q5T4S7.1|UBR4_HUMAN
13669	9090	C	T	Locus_30667.0|BlastHit|gi|74744979|sp|Q5T4S7.1|UBR4_HUMAN
13669	9469	G	A	Locus_30667.0|BlastHit|gi|74744979|sp|Q5T4S7.1|UBR4_HUMAN
13691	2039	G	T	Locus_30688.0|BlastHit|gi|308153407|sp|Q9UKV3.2|ACINU_HUMAN
13692	2408	C	T	Locus_30689.0|BlastHit|gi|229462870|sp|P23378.2|GCSP_HUMAN
13692	2450	C	T	Locus_30689.0|BlastHit|gi|229462870|sp|P23378.2|GCSP_HUMAN
13692	2729	G	A	Locus_30689.0|BlastHit|gi|229462870|sp|P23378.2|GCSP_HUMAN
13692	3239	T	C	Locus_30689.0|BlastHit|gi|229462870|sp|P23378.2|GCSP_HUMAN
13692	3332	A	T	Locus_30689.0|BlastHit|gi|229462870|sp|P23378.2|GCSP_HUMAN
13692	3356	A	G	Locus_30689.0|BlastHit|gi|229462870|sp|P23378.2|GCSP_HUMAN
13692	3605	C	T	Locus_30689.0|BlastHit|gi|229462870|sp|P23378.2|GCSP_HUMAN
13692	3664	T	A	Locus_30689.0|BlastHit|gi|229462870|sp|P23378.2|GCSP_HUMAN
13692	3712	A	T	Locus_30689.0|BlastHit|gi|229462870|sp|P23378.2|GCSP_HUMAN
13692	3713	A	T	Locus_30689.0|BlastHit|gi|229462870|sp|P23378.2|GCSP_HUMAN
13696	1099	C	T	Locus_30694.0|BlastHit|gi|25090702|sp|O46040.3|MSTAA_DROME
13696	2220	C	A	Locus_30694.0|BlastHit|gi|25090702|sp|O46040.3|MSTAA_DROME
13696	2292	A	T	Locus_30694.0|BlastHit|gi|25090702|sp|O46040.3|MSTAA_DROME
13696	3191	C	T	Locus_30694.0|BlastHit|gi|25090702|sp|O46040.3|MSTAA_DROME
13696	3345	T	A	Locus_30694.0|BlastHit|gi|25090702|sp|O46040.3|MSTAA_DROME
13696	4472	A	C	Locus_30694.0|BlastHit|gi|25090702|sp|O46040.3|MSTAA_DROME
13697	1426	C	T	Locus_30694.1|BlastHit|gi|82180300|sp|Q5XGM3.1|BHMT1_XENLA
13697	847	A	C	Locus_30694.1|BlastHit|gi|82180300|sp|Q5XGM3.1|BHMT1_XENLA
13699	1527	G	A	Locus_30700.0|BlastHit|gi|313104261|sp|O15213.3|WDR46_HUMAN
13699	1541	C	T	Locus_30700.0|BlastHit|gi|313104261|sp|O15213.3|WDR46_HUMAN
13699	1715	A	G	Locus_30700.0|BlastHit|gi|313104261|sp|O15213.3|WDR46_HUMAN
13699	1793	G	C	Locus_30700.0|BlastHit|gi|313104261|sp|O15213.3|WDR46_HUMAN
13699	1838	C	A	Locus_30700.0|BlastHit|gi|313104261|sp|O15213.3|WDR46_HUMAN
13708	1192	C	T	Locus_30709.0|BlastHit|gi|13634059|sp|P90893.2|YM9I_CAEEL
13727	596	A	G	Locus_30720.0|BlastHit|gi|13878495|sp|Q9D110.2|MTHFS_MOUSE
13727	966	A	G	Locus_30720.0|BlastHit|gi|13878495|sp|Q9D110.2|MTHFS_MOUSE
13732	766	G	A	Locus_30725.2|BlastHit|gi|82176404|sp|Q7ZWM6.1|OLA1_XENLA
13734	1158	G	A	Locus_30727.0|BlastHit|gi|74761664|sp|Q9NRN9.1|METL5_HUMAN
13734	789	G	C	Locus_30727.0|BlastHit|gi|74761664|sp|Q9NRN9.1|METL5_HUMAN
13734	958	C	T	Locus_30727.0|BlastHit|gi|74761664|sp|Q9NRN9.1|METL5_HUMAN
13734	966	T	C	Locus_30727.0|BlastHit|gi|74761664|sp|Q9NRN9.1|METL5_HUMAN
13738	1705	G	A	Locus_30731.0|BlastHit|gi|205371784|sp|Q24307.3|IAP2_DROME
13760	2383	A	C	Locus_30742.0|BlastHit|gi|205829936|sp|B2GV06.1|SCOT1_RAT
13760	2435	T	G	Locus_30742.0|BlastHit|gi|205829936|sp|B2GV06.1|SCOT1_RAT
13760	2590	G	A	Locus_30742.0|BlastHit|gi|205829936|sp|B2GV06.1|SCOT1_RAT
13763	1336	G	T	Locus_30745.0|BlastHit|gi|20454862|sp|Q9Y3D0.1|MIP18_HUMAN
13763	1469	G	A	Locus_30745.0|BlastHit|gi|20454862|sp|Q9Y3D0.1|MIP18_HUMAN
13763	1725	A	T	Locus_30745.0|BlastHit|gi|20454862|sp|Q9Y3D0.1|MIP18_HUMAN
13763	3181	T	C	Locus_30745.0|BlastHit|gi|20454862|sp|Q9Y3D0.1|MIP18_HUMAN
13763	3435	G	A	Locus_30745.0|BlastHit|gi|20454862|sp|Q9Y3D0.1|MIP18_HUMAN
13763	753	C	T	Locus_30745.0|BlastHit|gi|20454862|sp|Q9Y3D0.1|MIP18_HUMAN
13763	852	G	A	Locus_30745.0|BlastHit|gi|20454862|sp|Q9Y3D0.1|MIP18_HUMAN
13766	1738	A	G	Locus_30749.1|BlastHit|gi|74762569|sp|Q8NFD2.1|ANKK1_HUMAN
13781	1419	T	C	Locus_30761.0|BlastHit|gi|1703311|sp|P52183.1|ANNU_SCHAM
13781	415	C	T	Locus_30761.0|BlastHit|gi|1703311|sp|P52183.1|ANNU_SCHAM
13816	1489	C	T	Locus_30777.1|BlastHit|gi|117940157|sp|Q3ZBT2.1|FBX9_BOVIN
13825	1561	C	T	Locus_30779.0|BlastHit|gi|48428488|sp|Q9DBT9.1|M2GD_MOUSE
13825	2140	C	T	Locus_30779.0|BlastHit|gi|48428488|sp|Q9DBT9.1|M2GD_MOUSE
13825	2191	G	C	Locus_30779.0|BlastHit|gi|48428488|sp|Q9DBT9.1|M2GD_MOUSE
13825	2341	T	C	Locus_30779.0|BlastHit|gi|48428488|sp|Q9DBT9.1|M2GD_MOUSE
13825	2494	G	A	Locus_30779.0|BlastHit|gi|48428488|sp|Q9DBT9.1|M2GD_MOUSE
13825	2533	C	T	Locus_30779.0|BlastHit|gi|48428488|sp|Q9DBT9.1|M2GD_MOUSE
13825	2623	C	T	Locus_30779.0|BlastHit|gi|48428488|sp|Q9DBT9.1|M2GD_MOUSE
13847	1894	C	A	Locus_30791.0|BlastHit|gi|82183394|sp|Q6DIJ1.1|SYYC_XENTR
13851	1143	T	A	Locus_30795.0|BlastHit|gi|158518581|sp|Q3T186.2|RPIA_BOVIN
13851	1185	T	C	Locus_30795.0|BlastHit|gi|158518581|sp|Q3T186.2|RPIA_BOVIN
13851	1433	T	C	Locus_30795.0|BlastHit|gi|158518581|sp|Q3T186.2|RPIA_BOVIN
13851	1781	C	A	Locus_30795.0|BlastHit|gi|158518581|sp|Q3T186.2|RPIA_BOVIN
13851	1787	G	A	Locus_30795.0|BlastHit|gi|158518581|sp|Q3T186.2|RPIA_BOVIN
13851	1820	G	A	Locus_30795.0|BlastHit|gi|158518581|sp|Q3T186.2|RPIA_BOVIN
13851	961	C	T	Locus_30795.0|BlastHit|gi|158518581|sp|Q3T186.2|RPIA_BOVIN
13854	1427	A	G	Locus_30799.0|BlastHit|gi|13124177|sp|O61491.1|FLOT1_DROME
13854	1525	A	T	Locus_30799.0|BlastHit|gi|13124177|sp|O61491.1|FLOT1_DROME
13854	3072	T	C	Locus_30799.0|BlastHit|gi|13124177|sp|O61491.1|FLOT1_DROME
13854	3150	A	T	Locus_30799.0|BlastHit|gi|13124177|sp|O61491.1|FLOT1_DROME
13854	3151	A	T	Locus_30799.0|BlastHit|gi|13124177|sp|O61491.1|FLOT1_DROME
13854	3298	C	A	Locus_30799.0|BlastHit|gi|13124177|sp|O61491.1|FLOT1_DROME
13859	1632	A	G	Locus_30801.0|BlastHit|gi|75027177|sp|Q9VLM8.1|SYAC_DROME
13859	1641	C	T	Locus_30801.0|BlastHit|gi|75027177|sp|Q9VLM8.1|SYAC_DROME
13859	186	C	T	Locus_30801.0|BlastHit|gi|75027177|sp|Q9VLM8.1|SYAC_DROME
13859	2001	C	T	Locus_30801.0|BlastHit|gi|75027177|sp|Q9VLM8.1|SYAC_DROME
13859	2109	G	A	Locus_30801.0|BlastHit|gi|75027177|sp|Q9VLM8.1|SYAC_DROME
13859	312	T	C	Locus_30801.0|BlastHit|gi|75027177|sp|Q9VLM8.1|SYAC_DROME
13859	957	C	T	Locus_30801.0|BlastHit|gi|75027177|sp|Q9VLM8.1|SYAC_DROME
13867	2154	C	T	Locus_30807.0|BlastHit|gi|62900887|sp|Q9W0T5.2|PYX_DROME
13881	497	T	C	Locus_30816.0|BlastHit|gi|118573855|sp|Q32PI8.1|RT27_BOVIN
13886	687	G	A	Locus_30820.0|BlastHit|gi|61212960|sp|Q5VYK3.2|ECM29_HUMAN
13887	1947	G	A	Locus_30821.0|BlastHit|gi|122144648|sp|Q17QK8.1|SPRE_BOVIN
13887	2083	C	T	Locus_30821.0|BlastHit|gi|122144648|sp|Q17QK8.1|SPRE_BOVIN
13887	2212	C	T	Locus_30821.0|BlastHit|gi|122144648|sp|Q17QK8.1|SPRE_BOVIN
13898	2033	G	A	Locus_30826.2|BlastHit|gi|30172937|sp|Q99NB1.1|ACS2L_MOUSE
13912	234	C	T	Locus_30835.1|BlastHit|gi|341942269|sp|Q8CGC6.4|RBM28_MOUSE
13912	657	G	T	Locus_30835.1|BlastHit|gi|341942269|sp|Q8CGC6.4|RBM28_MOUSE
13913	704	A	G	Locus_30836.0|BlastHit|gi|308153566|sp|Q9Y4C8.3|RBM19_HUMAN
13913	716	A	G	Locus_30836.0|BlastHit|gi|308153566|sp|Q9Y4C8.3|RBM19_HUMAN
13914	2663	T	C	Locus_30837.0|BlastHit|gi|81175175|sp|Q08180.2|ICCR_DROME
13934	1359	A	G	Locus_30843.1|BlastHit|gi|82081062|sp|Q5ZIA5.1|COPB_CHICK
13937	1005	C	A	Locus_30845.0|BlastHit|gi|74731579|sp|Q96EL3.1|RM53_HUMAN
13937	1109	T	A	Locus_30845.0|BlastHit|gi|74731579|sp|Q96EL3.1|RM53_HUMAN
13937	360	T	C	Locus_30845.0|BlastHit|gi|74731579|sp|Q96EL3.1|RM53_HUMAN
13937	529	A	C	Locus_30845.0|BlastHit|gi|74731579|sp|Q96EL3.1|RM53_HUMAN
13937	658	T	C	Locus_30845.0|BlastHit|gi|74731579|sp|Q96EL3.1|RM53_HUMAN
13938	2025	T	C	Locus_30846.0|BlastHit|gi|75056061|sp|Q9GK13.1|MUTA_BOVIN
13938	2306	C	T	Locus_30846.0|BlastHit|gi|75056061|sp|Q9GK13.1|MUTA_BOVIN
13938	999	T	C	Locus_30846.0|BlastHit|gi|75056061|sp|Q9GK13.1|MUTA_BOVIN
13945	1388	C	T	Locus_30850.0|BlastHit|gi|46396031|sp|Q9U572.1|CLOT_PENMO
13945	2889	A	G	Locus_30850.0|BlastHit|gi|46396031|sp|Q9U572.1|CLOT_PENMO
13945	3708	G	A	Locus_30850.0|BlastHit|gi|46396031|sp|Q9U572.1|CLOT_PENMO
13945	4488	C	T	Locus_30850.0|BlastHit|gi|46396031|sp|Q9U572.1|CLOT_PENMO
13945	4491	C	T	Locus_30850.0|BlastHit|gi|46396031|sp|Q9U572.1|CLOT_PENMO
13945	5099	T	G	Locus_30850.0|BlastHit|gi|46396031|sp|Q9U572.1|CLOT_PENMO
13946	187	T	G	Locus_30852.0|BlastHit|gi|215274260|sp|O43451.5|MGA_HUMAN
13946	462	G	A	Locus_30852.0|BlastHit|gi|215274260|sp|O43451.5|MGA_HUMAN
13949	2078	A	G	Locus_30854.0|BlastHit|gi|51338674|sp|Q8BTY8.1|SCFD2_MOUSE
13949	2510	C	T	Locus_30854.0|BlastHit|gi|51338674|sp|Q8BTY8.1|SCFD2_MOUSE
13968	1467	T	C	Locus_30857.0|BlastHit|gi|20981731|sp|Q9TTY1.2|TIMP2_CANFA
13968	1736	C	T	Locus_30857.0|BlastHit|gi|20981731|sp|Q9TTY1.2|TIMP2_CANFA
13968	1816	C	T	Locus_30857.0|BlastHit|gi|20981731|sp|Q9TTY1.2|TIMP2_CANFA
13968	1844	A	T	Locus_30857.0|BlastHit|gi|20981731|sp|Q9TTY1.2|TIMP2_CANFA
13968	311	C	T	Locus_30857.0|BlastHit|gi|20981731|sp|Q9TTY1.2|TIMP2_CANFA
13968	62	T	C	Locus_30857.0|BlastHit|gi|20981731|sp|Q9TTY1.2|TIMP2_CANFA
13969	7246	C	T	Locus_30858.0|BlastHit|gi|84028189|sp|Q8K389.3|CK5P2_MOUSE
13969	7442	A	G	Locus_30858.0|BlastHit|gi|84028189|sp|Q8K389.3|CK5P2_MOUSE
13969	7668	G	A	Locus_30858.0|BlastHit|gi|84028189|sp|Q8K389.3|CK5P2_MOUSE
13976	492	T	A	Locus_30863.1|BlastHit|gi|13124197|sp|P82147.1|L2EFL_DROME
13978	2216	T	A	Locus_30865.0|BlastHit|gi|8928105|sp|Q9QXB9.1|DRG2_MOUSE
13978	2378	T	A	Locus_30865.0|BlastHit|gi|8928105|sp|Q9QXB9.1|DRG2_MOUSE
13978	2420	G	A	Locus_30865.0|BlastHit|gi|8928105|sp|Q9QXB9.1|DRG2_MOUSE
13978	2523	T	A	Locus_30865.0|BlastHit|gi|8928105|sp|Q9QXB9.1|DRG2_MOUSE
13978	2630	G	A	Locus_30865.0|BlastHit|gi|8928105|sp|Q9QXB9.1|DRG2_MOUSE
13978	3000	T	A	Locus_30865.0|BlastHit|gi|8928105|sp|Q9QXB9.1|DRG2_MOUSE
13981	1717	C	T	Locus_30869.0|BlastHit|gi|110825796|sp|P00818.2|ACYP2_HORSE
13981	2056	A	G	Locus_30869.0|BlastHit|gi|110825796|sp|P00818.2|ACYP2_HORSE
13981	2098	G	A	Locus_30869.0|BlastHit|gi|110825796|sp|P00818.2|ACYP2_HORSE
13981	2118	A	G	Locus_30869.0|BlastHit|gi|110825796|sp|P00818.2|ACYP2_HORSE
13981	2377	C	T	Locus_30869.0|BlastHit|gi|110825796|sp|P00818.2|ACYP2_HORSE
13981	2381	G	T	Locus_30869.0|BlastHit|gi|110825796|sp|P00818.2|ACYP2_HORSE
13981	2472	A	T	Locus_30869.0|BlastHit|gi|110825796|sp|P00818.2|ACYP2_HORSE
13981	253	A	T	Locus_30869.0|BlastHit|gi|110825796|sp|P00818.2|ACYP2_HORSE
13981	2576	A	C	Locus_30869.0|BlastHit|gi|110825796|sp|P00818.2|ACYP2_HORSE
13981	2775	C	T	Locus_30869.0|BlastHit|gi|110825796|sp|P00818.2|ACYP2_HORSE
13981	3271	A	G	Locus_30869.0|BlastHit|gi|110825796|sp|P00818.2|ACYP2_HORSE
13981	3457	C	G	Locus_30869.0|BlastHit|gi|110825796|sp|P00818.2|ACYP2_HORSE
13981	3458	T	G	Locus_30869.0|BlastHit|gi|110825796|sp|P00818.2|ACYP2_HORSE
13981	3537	A	T	Locus_30869.0|BlastHit|gi|110825796|sp|P00818.2|ACYP2_HORSE
13981	3540	A	G	Locus_30869.0|BlastHit|gi|110825796|sp|P00818.2|ACYP2_HORSE
13983	298	A	T	Locus_30873.0|BlastHit|gi|109892883|sp|Q3ZBL5.1|PTH2_BOVIN
13983	316	T	C	Locus_30873.0|BlastHit|gi|109892883|sp|Q3ZBL5.1|PTH2_BOVIN
13983	419	C	T	Locus_30873.0|BlastHit|gi|109892883|sp|Q3ZBL5.1|PTH2_BOVIN
13983	640	A	G	Locus_30873.0|BlastHit|gi|109892883|sp|Q3ZBL5.1|PTH2_BOVIN
13983	866	T	C	Locus_30873.0|BlastHit|gi|109892883|sp|Q3ZBL5.1|PTH2_BOVIN
13983	899	C	A	Locus_30873.0|BlastHit|gi|109892883|sp|Q3ZBL5.1|PTH2_BOVIN
13983	997	C	T	Locus_30873.0|BlastHit|gi|109892883|sp|Q3ZBL5.1|PTH2_BOVIN
13984	1031	A	G	Locus_30874.0|BlastHit|gi|189041716|sp|P35035.3|TRY1_ANOGA
13995	6510	T	C	Locus_30880.0|BlastHit|gi|269849747|sp|Q86YJ7.4|AN13B_HUMAN
13997	2106	G	A	Locus_30882.0|BlastHit|gi|113016|sp|P15650.1|ACADL_RAT
13997	2130	C	T	Locus_30882.0|BlastHit|gi|113016|sp|P15650.1|ACADL_RAT
13997	304	G	T	Locus_30882.0|BlastHit|gi|113016|sp|P15650.1|ACADL_RAT
13997	309	A	T	Locus_30882.0|BlastHit|gi|113016|sp|P15650.1|ACADL_RAT
13997	921	G	A	Locus_30882.0|BlastHit|gi|113016|sp|P15650.1|ACADL_RAT
13998	2001	G	T	Locus_30883.0|BlastHit|gi|82178628|sp|Q5BKL1.1|CG025_XENTR
13998	2196	A	T	Locus_30883.0|BlastHit|gi|82178628|sp|Q5BKL1.1|CG025_XENTR
14006	1857	G	A	Locus_30893.0|BlastHit|gi|13124197|sp|P82147.1|L2EFL_DROME
14006	2340	C	T	Locus_30893.0|BlastHit|gi|13124197|sp|P82147.1|L2EFL_DROME
14006	973	C	T	Locus_30893.0|BlastHit|gi|13124197|sp|P82147.1|L2EFL_DROME
14009	3238	T	A	Locus_30895.0|BlastHit|gi|22095990|sp|Q9NRD5.2|PICK1_HUMAN
14012	1474	G	A	Locus_30897.0|BlastHit|gi|66774221|sp|Q9CZR2.2|NALD2_MOUSE
14012	1840	T	C	Locus_30897.0|BlastHit|gi|66774221|sp|Q9CZR2.2|NALD2_MOUSE
14012	489	A	G	Locus_30897.0|BlastHit|gi|66774221|sp|Q9CZR2.2|NALD2_MOUSE
14012	492	T	C	Locus_30897.0|BlastHit|gi|66774221|sp|Q9CZR2.2|NALD2_MOUSE
14015	1368	A	G	Locus_30901.1|BlastHit|gi|82197784|sp|Q5ZJJ5.1|AKTIP_CHICK
14015	2306	A	G	Locus_30901.1|BlastHit|gi|82197784|sp|Q5ZJJ5.1|AKTIP_CHICK
14015	248	T	G	Locus_30901.1|BlastHit|gi|82197784|sp|Q5ZJJ5.1|AKTIP_CHICK
14017	743	T	G	Locus_30905.0|BlastHit|gi|50403787|sp|Q86BE9.3|PEN2_DROME
14022	1979	T	G	Locus_30913.0|BlastHit|gi|37537952|sp|Q8CFV9.2|RIFK_MOUSE
14023	1734	C	G	Locus_30914.3|BlastHit|gi|13959710|sp|P12613.2|TCPA_DROME
14023	696	C	T	Locus_30914.3|BlastHit|gi|13959710|sp|P12613.2|TCPA_DROME
14023	931	T	C	Locus_30914.3|BlastHit|gi|13959710|sp|P12613.2|TCPA_DROME
14025	1937	A	G	Locus_30918.0|BlastHit|gi|126924|sp|P21448.2|MDR1_CRIGR
14025	953	G	A	Locus_30918.0|BlastHit|gi|126924|sp|P21448.2|MDR1_CRIGR
14040	234	C	T	Locus_30930.0|BlastHit|gi|37537989|sp|Q9CX34.3|SUGT1_MOUSE
14043	767	T	C	Locus_30933.0|BlastHit|gi|81883408|sp|Q5RKL5.1|STEA3_RAT
14043	983	G	A	Locus_30933.0|BlastHit|gi|81883408|sp|Q5RKL5.1|STEA3_RAT
14049	2493	T	C	Locus_30938.0|BlastHit|gi|116242796|sp|Q9UQ90.2|SPG7_HUMAN
14066	673	A	T	Locus_30950.0|BlastHit|gi|115502357|sp|Q3MQ24.2|ATG5_BOVIN
14071	1517	C	T	Locus_30954.0|BlastHit|gi|51338793|sp|P70699.2|LYAG_MOUSE
14071	634	C	T	Locus_30954.0|BlastHit|gi|51338793|sp|P70699.2|LYAG_MOUSE
14076	1641	T	C	Locus_30955.0|BlastHit|gi|136223|sp|P05547.1|TNNI_PONLE
14076	1672	T	A	Locus_30955.0|BlastHit|gi|136223|sp|P05547.1|TNNI_PONLE
14076	682	C	T	Locus_30955.0|BlastHit|gi|136223|sp|P05547.1|TNNI_PONLE
14079	7943	T	C	Locus_30956.0|BlastHit|gi|257051067|sp|Q8NF91.3|SYNE1_HUMAN
14079	8567	G	A	Locus_30956.0|BlastHit|gi|257051067|sp|Q8NF91.3|SYNE1_HUMAN
14079	8576	T	C	Locus_30956.0|BlastHit|gi|257051067|sp|Q8NF91.3|SYNE1_HUMAN
14079	8726	T	C	Locus_30956.0|BlastHit|gi|257051067|sp|Q8NF91.3|SYNE1_HUMAN
14079	9245	C	A	Locus_30956.0|BlastHit|gi|257051067|sp|Q8NF91.3|SYNE1_HUMAN
14104	2836	T	A	Locus_30964.0|BlastHit|gi|122065194|sp|P39087.4|GRIK2_MOUSE
14108	602	C	A	Locus_30968.0|BlastHit|gi|82185629|sp|Q6NV04.1|ILVBL_DANRE
14108	661	T	C	Locus_30968.0|BlastHit|gi|82185629|sp|Q6NV04.1|ILVBL_DANRE
14109	4025	A	G	Locus_30969.0|BlastHit|gi|116241246|sp|P16157.3|ANK1_HUMAN
14139	1621	A	G	Locus_30984.0|BlastHit|gi|160152553|sp|Q5PRA2.2|DHTK1_DANRE
14139	2515	C	G	Locus_30984.0|BlastHit|gi|160152553|sp|Q5PRA2.2|DHTK1_DANRE
14139	2713	C	T	Locus_30984.0|BlastHit|gi|160152553|sp|Q5PRA2.2|DHTK1_DANRE
14139	2940	A	C	Locus_30984.0|BlastHit|gi|160152553|sp|Q5PRA2.2|DHTK1_DANRE
14139	3388	A	G	Locus_30984.0|BlastHit|gi|160152553|sp|Q5PRA2.2|DHTK1_DANRE
14140	483	C	T	Locus_30985.0|BlastHit|gi|226694803|sp|B5FXA0.1|LYRM5_TAEGU
14140	542	A	T	Locus_30985.0|BlastHit|gi|226694803|sp|B5FXA0.1|LYRM5_TAEGU
14140	587	T	C	Locus_30985.0|BlastHit|gi|226694803|sp|B5FXA0.1|LYRM5_TAEGU
14142	27	T	C	Locus_30986.0|BlastHit|gi|75057599|sp|Q58D05.1|TRAD1_BOVIN
14157	5562	C	T	Locus_30997.1|BlastHit|gi|116241365|sp|P21333.4|FLNA_HUMAN
14164	275	A	G	Locus_31008.0|BlastHit|gi|1709947|sp|P11498.2|PYC_HUMAN
14175	3852	A	G	Locus_31013.1|BlastHit|gi|158514861|sp|A0AAS4.2|SMS1_PIG
14175	4774	A	G	Locus_31013.1|BlastHit|gi|158514861|sp|A0AAS4.2|SMS1_PIG
14179	2793	T	C	Locus_31014.0|BlastHit|gi|166987398|sp|Q5QJE6.2|TDIF2_HUMAN
14179	3069	T	C	Locus_31014.0|BlastHit|gi|166987398|sp|Q5QJE6.2|TDIF2_HUMAN
14190	2860	T	G	Locus_31015.0|BlastHit|gi|317373536|sp|P98160.4|PGBM_HUMAN
14210	3081	T	A	Locus_31025.0|BlastHit|gi|74871953|sp|Q9VZZ4.1|PXDN_DROME
14211	2757	T	G	Locus_31025.0|BlastHit|gi|74871953|sp|Q9VZZ4.1|PXDN_DROME
14211	3489	A	T	Locus_31025.0|BlastHit|gi|74871953|sp|Q9VZZ4.1|PXDN_DROME
14212	620	C	T	Locus_31027.0|BlastHit|gi|294862512|sp|Q921M4.3|GOGA2_MOUSE
14212	633	G	C	Locus_31027.0|BlastHit|gi|294862512|sp|Q921M4.3|GOGA2_MOUSE
14218	1660	T	C	Locus_31033.3|BlastHit|gi|22096349|sp|Q9V5L3.3|C49A1_DROME
14218	1672	G	A	Locus_31033.3|BlastHit|gi|22096349|sp|Q9V5L3.3|C49A1_DROME
14221	138	A	G	Locus_31034.0|BlastHit|gi|115502434|sp|P21839.2|ODBB_BOVIN
14221	2056	G	A	Locus_31034.0|BlastHit|gi|115502434|sp|P21839.2|ODBB_BOVIN
14221	452	T	C	Locus_31034.0|BlastHit|gi|115502434|sp|P21839.2|ODBB_BOVIN
14233	1361	T	C	Locus_31042.0|BlastHit|gi|34223733|sp|P59046.2|NAL12_HUMAN
14233	1370	A	G	Locus_31042.0|BlastHit|gi|34223733|sp|P59046.2|NAL12_HUMAN
14233	387	A	G	Locus_31042.0|BlastHit|gi|34223733|sp|P59046.2|NAL12_HUMAN
14256	322	T	A	Locus_31046.1|BlastHit|gi|3023514|sp|Q29611.1|CLN3_CANFA
14257	165	G	A	Locus_31046.1|BlastHit|gi|3023514|sp|Q29611.1|CLN3_CANFA
14257	826	G	A	Locus_31046.1|BlastHit|gi|3023514|sp|Q29611.1|CLN3_CANFA
14258	320	T	G	Locus_31047.0|BlastHit|gi|215273945|sp|Q9NQZ5.2|STAR7_HUMAN
14282	647	C	T	Locus_31060.0|BlastHit|gi|218512139|sp|Q13233.4|M3K1_HUMAN
14296	3666	C	T	Locus_31075.1|BlastHit|gi|160013300|sp|Q6PIP5.2|NUDC1_MOUSE
14308	2629	C	T	Locus_31085.0|BlastHit|gi|67461560|sp|Q5VUG0.1|SMBT2_HUMAN
14312	139	T	G	Locus_31089.0|BlastHit|gi|342187146|sp|Q62468.3|VILI_MOUSE
14312	1446	C	T	Locus_31089.0|BlastHit|gi|342187146|sp|Q62468.3|VILI_MOUSE
14312	2556	G	A	Locus_31089.0|BlastHit|gi|342187146|sp|Q62468.3|VILI_MOUSE
14312	3201	G	A	Locus_31089.0|BlastHit|gi|342187146|sp|Q62468.3|VILI_MOUSE
14312	490	A	G	Locus_31089.0|BlastHit|gi|342187146|sp|Q62468.3|VILI_MOUSE
14317	2141	A	G	Locus_31094.0|BlastHit|gi|45477238|sp|Q8TB96.1|TIP_HUMAN
14318	60	T	A,G	Locus_31095.0|BlastHit|gi|10720196|sp|Q9W679.1|P53_TETMU
14329	161	A	G	Locus_31098.0|BlastHit|gi|33860195|sp|Q9VD51.2|DDX18_DROME
14329	2770	A	G	Locus_31098.0|BlastHit|gi|33860195|sp|Q9VD51.2|DDX18_DROME
14329	380	G	A	Locus_31098.0|BlastHit|gi|33860195|sp|Q9VD51.2|DDX18_DROME
14329	926	A	G	Locus_31098.0|BlastHit|gi|33860195|sp|Q9VD51.2|DDX18_DROME
14337	2331	A	T	Locus_31101.0|BlastHit|gi|296452898|sp|Q8N695.2|SC5A8_HUMAN
14337	2664	C	T	Locus_31101.0|BlastHit|gi|296452898|sp|Q8N695.2|SC5A8_HUMAN
14337	2673	G	A	Locus_31101.0|BlastHit|gi|296452898|sp|Q8N695.2|SC5A8_HUMAN
14337	2712	C	G	Locus_31101.0|BlastHit|gi|296452898|sp|Q8N695.2|SC5A8_HUMAN
14337	2808	A	C	Locus_31101.0|BlastHit|gi|296452898|sp|Q8N695.2|SC5A8_HUMAN
14337	2958	A	C	Locus_31101.0|BlastHit|gi|296452898|sp|Q8N695.2|SC5A8_HUMAN
14337	3192	G	A	Locus_31101.0|BlastHit|gi|296452898|sp|Q8N695.2|SC5A8_HUMAN
14337	3576	C	A	Locus_31101.0|BlastHit|gi|296452898|sp|Q8N695.2|SC5A8_HUMAN
14338	107	C	A	Locus_31103.0|BlastHit|gi|48429265|sp|Q9UKG9.2|OCTC_HUMAN
14338	639	G	A	Locus_31103.0|BlastHit|gi|48429265|sp|Q9UKG9.2|OCTC_HUMAN
14338	787	G	A	Locus_31103.0|BlastHit|gi|48429265|sp|Q9UKG9.2|OCTC_HUMAN
14338	789	T	A	Locus_31103.0|BlastHit|gi|48429265|sp|Q9UKG9.2|OCTC_HUMAN
14344	4114	G	A	Locus_31110.0|BlastHit|gi|296434489|sp|Q7L9B9.2|EEPD1_HUMAN
14345	5405	A	T	Locus_31111.0|BlastHit|gi|12644121|sp|P12080.2|ITA2_DROME
14345	5567	A	G	Locus_31111.0|BlastHit|gi|12644121|sp|P12080.2|ITA2_DROME
1435	58	C	T	Locus_10212.0|BlastHit|gi|1709616|sp|P54399.1|PDI_DROME
14379	1169	C	G	Locus_31128.0|BlastHit|gi|23821938|sp|Q9P0L9.1|PK2L1_HUMAN
14379	1171	C	T	Locus_31128.0|BlastHit|gi|23821938|sp|Q9P0L9.1|PK2L1_HUMAN
14380	3942	T	A,G	Locus_31129.0|BlastHit|gi|47116751|sp|Q9DBV3.2|DHX34_MOUSE
14381	597	C	T	Locus_31130.0|BlastHit|gi|71153334|sp|Q9H8H2.2|DDX31_HUMAN
14388	213	C	T	Locus_31136.0|BlastHit|gi|215275190|sp|A6QNS3.1|ABR_BOVIN
14390	2064	G	C	Locus_31137.0|BlastHit|gi|67460824|sp|Q6P2Q9.2|PRP8_HUMAN
14390	2100	A	G	Locus_31137.0|BlastHit|gi|67460824|sp|Q6P2Q9.2|PRP8_HUMAN
14391	4334	C	T	Locus_31138.0|BlastHit|gi|729616|sp|P40197.1|GPV_HUMAN
14392	2835	T	A	Locus_31139.0|BlastHit|gi|115347|sp|P27393.1|CO4A2_ASCSU
14392	4085	T	C	Locus_31139.0|BlastHit|gi|115347|sp|P27393.1|CO4A2_ASCSU
14396	1252	T	C	Locus_31143.0|BlastHit|gi|109919868|sp|P79098.4|AMPN_BOVIN
14396	1703	C	T	Locus_31143.0|BlastHit|gi|109919868|sp|P79098.4|AMPN_BOVIN
14396	1940	C	T	Locus_31143.0|BlastHit|gi|109919868|sp|P79098.4|AMPN_BOVIN
14396	696	C	T	Locus_31143.0|BlastHit|gi|109919868|sp|P79098.4|AMPN_BOVIN
14396	776	T	G	Locus_31143.0|BlastHit|gi|109919868|sp|P79098.4|AMPN_BOVIN
14396	89	C	A	Locus_31143.0|BlastHit|gi|109919868|sp|P79098.4|AMPN_BOVIN
14402	3515	A	G	Locus_31151.0|BlastHit|gi|37999799|sp|Q9NWQ9.1|CN119_HUMAN
14403	344	A	G	Locus_31153.1|BlastHit|gi|48428689|sp|Q9P2J5.2|SYLC_HUMAN
14415	152	G	A	Locus_31156.0|BlastHit|gi|20455027|sp|Q9UJ83.2|HACL1_HUMAN
14415	594	C	G,T	Locus_31156.0|BlastHit|gi|20455027|sp|Q9UJ83.2|HACL1_HUMAN
14422	139	G	A	Locus_31161.0|BlastHit|gi|308153641|sp|A8K2U0.3|A2ML1_HUMAN
14422	1589	T	C	Locus_31161.0|BlastHit|gi|308153641|sp|A8K2U0.3|A2ML1_HUMAN
14422	1673	A	G,T	Locus_31161.0|BlastHit|gi|308153641|sp|A8K2U0.3|A2ML1_HUMAN
14422	32	T	G	Locus_31161.0|BlastHit|gi|308153641|sp|A8K2U0.3|A2ML1_HUMAN
14423	1199	C	T	Locus_31162.0|BlastHit|gi|55584077|sp|O02776.1|PARG_BOVIN
14423	4297	A	G	Locus_31162.0|BlastHit|gi|55584077|sp|O02776.1|PARG_BOVIN
14428	1869	C	A	Locus_31169.0|BlastHit|gi|21264475|sp|Q09225.3|NRF6_CAEEL
14432	9581	A	T	Locus_31170.0|BlastHit|gi|158705853|sp|A5WUT8.1|EPG5_DANRE
14437	1220	A	T	Locus_31173.0|BlastHit|gi|1168323|sp|P45886.1|ACT3_BACDO
14437	1227	C	T	Locus_31173.0|BlastHit|gi|1168323|sp|P45886.1|ACT3_BACDO
14438	1325	C	G	Locus_31173.0|BlastHit|gi|1168320|sp|P45885.1|ACT2_BACDO
14438	159	C	A	Locus_31173.0|BlastHit|gi|1168320|sp|P45885.1|ACT2_BACDO
14439	279	G	A	Locus_31173.0|BlastHit|gi|113288|sp|P10994.1|ACTS_PLEWA
14439	311	C	A	Locus_31173.0|BlastHit|gi|113288|sp|P10994.1|ACTS_PLEWA
14440	1120	C	G	Locus_31174.0|BlastHit|gi|62511132|sp|Q9H2M9.1|RBGPR_HUMAN
14440	1603	T	C	Locus_31174.0|BlastHit|gi|62511132|sp|Q9H2M9.1|RBGPR_HUMAN
14440	266	A	C	Locus_31174.0|BlastHit|gi|62511132|sp|Q9H2M9.1|RBGPR_HUMAN
14442	1321	A	C	Locus_31177.0|BlastHit|gi|187471089|sp|Q9D3S9.2|CPVL_MOUSE
14442	1806	A	G	Locus_31177.0|BlastHit|gi|187471089|sp|Q9D3S9.2|CPVL_MOUSE
14442	858	A	G	Locus_31177.0|BlastHit|gi|187471089|sp|Q9D3S9.2|CPVL_MOUSE
14460	236	T	C	Locus_31186.0|BlastHit|gi|30316295|sp|Q9PLI5.2|Y114_CHLMU
14460	311	T	C,A	Locus_31186.0|BlastHit|gi|30316295|sp|Q9PLI5.2|Y114_CHLMU
14460	314	C	T	Locus_31186.0|BlastHit|gi|30316295|sp|Q9PLI5.2|Y114_CHLMU
14460	365	T	C	Locus_31186.0|BlastHit|gi|30316295|sp|Q9PLI5.2|Y114_CHLMU
14461	215	T	A	Locus_31186.0|BlastHit|gi|110816488|sp|Q3BAI2.1|YCX91_PHAAO
14461	46	T	G,A	Locus_31186.0|BlastHit|gi|110816488|sp|Q3BAI2.1|YCX91_PHAAO
14461	49	C	T	Locus_31186.0|BlastHit|gi|110816488|sp|Q3BAI2.1|YCX91_PHAAO
14461	51	T	G,C	Locus_31186.0|BlastHit|gi|110816488|sp|Q3BAI2.1|YCX91_PHAAO
14461	6	G	C	Locus_31186.0|BlastHit|gi|110816488|sp|Q3BAI2.1|YCX91_PHAAO
14461	99	T	A,G	Locus_31186.0|BlastHit|gi|110816488|sp|Q3BAI2.1|YCX91_PHAAO
14467	1249	A	T	Locus_31190.0|BlastHit|gi|73917744|sp|Q6NXD2.1|CHM2B_DANRE
14467	322	A	G	Locus_31190.0|BlastHit|gi|73917744|sp|Q6NXD2.1|CHM2B_DANRE
14470	2393	C	T	Locus_31194.0|BlastHit|gi|74868771|sp|Q9VF87.1|CYFIP_DROME
14470	603	G	T	Locus_31194.0|BlastHit|gi|74868771|sp|Q9VF87.1|CYFIP_DROME
14470	915	C	A	Locus_31194.0|BlastHit|gi|74868771|sp|Q9VF87.1|CYFIP_DROME
14480	3085	A	T	Locus_31198.0|BlastHit|gi|82200408|sp|Q6DJJ6.1|RHN2A_XENLA
14481	1577	C	T	Locus_31199.0|BlastHit|gi|122065794|sp|Q0KHY3.1|Y1004_DROME
14481	2749	G	T	Locus_31199.0|BlastHit|gi|122065794|sp|Q0KHY3.1|Y1004_DROME
14481	2761	A	C	Locus_31199.0|BlastHit|gi|122065794|sp|Q0KHY3.1|Y1004_DROME
14481	3753	G	C	Locus_31199.0|BlastHit|gi|122065794|sp|Q0KHY3.1|Y1004_DROME
14481	4205	C	T	Locus_31199.0|BlastHit|gi|122065794|sp|Q0KHY3.1|Y1004_DROME
14481	4255	A	T	Locus_31199.0|BlastHit|gi|122065794|sp|Q0KHY3.1|Y1004_DROME
14481	4311	G	T	Locus_31199.0|BlastHit|gi|122065794|sp|Q0KHY3.1|Y1004_DROME
14481	4420	A	T	Locus_31199.0|BlastHit|gi|122065794|sp|Q0KHY3.1|Y1004_DROME
14481	4499	C	G	Locus_31199.0|BlastHit|gi|122065794|sp|Q0KHY3.1|Y1004_DROME
14481	4513	G	A	Locus_31199.0|BlastHit|gi|122065794|sp|Q0KHY3.1|Y1004_DROME
14488	7765	C	T	Locus_31207.0|BlastHit|gi|308153682|sp|Q96BY7.5|ATG2B_HUMAN
14488	9046	C	T	Locus_31207.0|BlastHit|gi|308153682|sp|Q96BY7.5|ATG2B_HUMAN
14489	1140	A	G	Locus_31208.0|BlastHit|gi|152031623|sp|P02515.4|HSP22_DROME
14489	1456	G	C	Locus_31208.0|BlastHit|gi|152031623|sp|P02515.4|HSP22_DROME
14489	1476	C	T	Locus_31208.0|BlastHit|gi|152031623|sp|P02515.4|HSP22_DROME
14489	1540	T	C	Locus_31208.0|BlastHit|gi|152031623|sp|P02515.4|HSP22_DROME
14489	491	A	G	Locus_31208.0|BlastHit|gi|152031623|sp|P02515.4|HSP22_DROME
14489	787	T	C	Locus_31208.0|BlastHit|gi|152031623|sp|P02515.4|HSP22_DROME
14489	815	C	G,T	Locus_31208.0|BlastHit|gi|152031623|sp|P02515.4|HSP22_DROME
14489	941	T	C	Locus_31208.0|BlastHit|gi|152031623|sp|P02515.4|HSP22_DROME
14490	10018	C	T	Locus_31209.0|BlastHit|gi|33112444|sp|Q24498.3|RY44_DROME
14490	4363	C	A	Locus_31209.0|BlastHit|gi|33112444|sp|Q24498.3|RY44_DROME
14490	6670	G	A,T	Locus_31209.0|BlastHit|gi|33112444|sp|Q24498.3|RY44_DROME
14490	7357	T	G	Locus_31209.0|BlastHit|gi|33112444|sp|Q24498.3|RY44_DROME
14490	8473	A	G	Locus_31209.0|BlastHit|gi|33112444|sp|Q24498.3|RY44_DROME
14490	8539	A	T	Locus_31209.0|BlastHit|gi|33112444|sp|Q24498.3|RY44_DROME
14490	8551	C	T	Locus_31209.0|BlastHit|gi|33112444|sp|Q24498.3|RY44_DROME
14490	8659	T	C	Locus_31209.0|BlastHit|gi|33112444|sp|Q24498.3|RY44_DROME
14490	9055	C	A	Locus_31209.0|BlastHit|gi|33112444|sp|Q24498.3|RY44_DROME
14490	9859	G	T,A	Locus_31209.0|BlastHit|gi|33112444|sp|Q24498.3|RY44_DROME
14491	6590	T	C	Locus_31211.0|BlastHit|gi|56405335|sp|P37276.2|DYHC_DROME
14491	8403	C	T	Locus_31211.0|BlastHit|gi|56405335|sp|P37276.2|DYHC_DROME
14491	8528	A	G	Locus_31211.0|BlastHit|gi|56405335|sp|P37276.2|DYHC_DROME
14501	1104	G	A	Locus_31216.0|BlastHit|gi|341940350|sp|Q99LL3.2|CHSTC_MOUSE
14501	1163	T	C	Locus_31216.0|BlastHit|gi|341940350|sp|Q99LL3.2|CHSTC_MOUSE
14501	1415	G	A	Locus_31216.0|BlastHit|gi|341940350|sp|Q99LL3.2|CHSTC_MOUSE
14501	1523	A	C,G	Locus_31216.0|BlastHit|gi|341940350|sp|Q99LL3.2|CHSTC_MOUSE
14501	1718	G	C	Locus_31216.0|BlastHit|gi|341940350|sp|Q99LL3.2|CHSTC_MOUSE
14501	658	C	A	Locus_31216.0|BlastHit|gi|341940350|sp|Q99LL3.2|CHSTC_MOUSE
14514	179	C	A	Locus_31223.0|BlastHit|gi|22095856|sp|Q9BXT6.1|M10L1_HUMAN
14516	1969	G	C	Locus_31226.0|BlastHit|gi|115311393|sp|P83099.3|KPC4_DROME
14516	4520	T	C	Locus_31226.0|BlastHit|gi|115311393|sp|P83099.3|KPC4_DROME
14516	4607	C	T	Locus_31226.0|BlastHit|gi|115311393|sp|P83099.3|KPC4_DROME
14516	5002	A	T	Locus_31226.0|BlastHit|gi|115311393|sp|P83099.3|KPC4_DROME
14516	5021	A	C	Locus_31226.0|BlastHit|gi|115311393|sp|P83099.3|KPC4_DROME
14516	5477	C	A	Locus_31226.0|BlastHit|gi|115311393|sp|P83099.3|KPC4_DROME
14516	5492	C	A	Locus_31226.0|BlastHit|gi|115311393|sp|P83099.3|KPC4_DROME
14517	2745	A	G	Locus_31227.0|BlastHit|gi|46396416|sp|Q8CCN1.1|NAL10_MOUSE
14517	3042	G	A	Locus_31227.0|BlastHit|gi|46396416|sp|Q8CCN1.1|NAL10_MOUSE
14520	1039	A	G	Locus_31229.0|BlastHit|gi|51316559|sp|Q9R189.1|UN13D_RAT
14520	1723	G	A	Locus_31229.0|BlastHit|gi|51316559|sp|Q9R189.1|UN13D_RAT
14520	1822	A	G	Locus_31229.0|BlastHit|gi|51316559|sp|Q9R189.1|UN13D_RAT
14520	1843	C	T	Locus_31229.0|BlastHit|gi|51316559|sp|Q9R189.1|UN13D_RAT
14520	2523	T	C	Locus_31229.0|BlastHit|gi|51316559|sp|Q9R189.1|UN13D_RAT
14520	2731	T	C	Locus_31229.0|BlastHit|gi|51316559|sp|Q9R189.1|UN13D_RAT
14529	34	C	T	Locus_31236.2|BlastHit|gi|110825729|sp|P05661.4|MYSA_DROME
14530	127	C	T	Locus_31236.2|BlastHit|gi|110825729|sp|P05661.4|MYSA_DROME
14531	1560	C	T	Locus_31236.2|BlastHit|gi|110825729|sp|P05661.4|MYSA_DROME
14531	1998	A	G	Locus_31236.2|BlastHit|gi|110825729|sp|P05661.4|MYSA_DROME
14531	2232	T	A	Locus_31236.2|BlastHit|gi|110825729|sp|P05661.4|MYSA_DROME
14531	2766	G	A	Locus_31236.2|BlastHit|gi|110825729|sp|P05661.4|MYSA_DROME
14531	2883	G	A	Locus_31236.2|BlastHit|gi|110825729|sp|P05661.4|MYSA_DROME
14531	3099	A	G	Locus_31236.2|BlastHit|gi|110825729|sp|P05661.4|MYSA_DROME
14551	1422	T	C	Locus_31247.0|BlastHit|gi|81873944|sp|Q8BJD1.1|ITIH5_MOUSE
14551	592	G	A	Locus_31247.0|BlastHit|gi|81873944|sp|Q8BJD1.1|ITIH5_MOUSE
14551	617	C	T	Locus_31247.0|BlastHit|gi|81873944|sp|Q8BJD1.1|ITIH5_MOUSE
14551	719	G	A	Locus_31247.0|BlastHit|gi|81873944|sp|Q8BJD1.1|ITIH5_MOUSE
14551	894	A	G	Locus_31247.0|BlastHit|gi|81873944|sp|Q8BJD1.1|ITIH5_MOUSE
14553	3010	G	A	Locus_31251.0|BlastHit|gi|141475|sp|P14381.1|YTX2_XENLA
14553	3016	A	G	Locus_31251.0|BlastHit|gi|141475|sp|P14381.1|YTX2_XENLA
14553	3185	T	A	Locus_31251.0|BlastHit|gi|141475|sp|P14381.1|YTX2_XENLA
14553	3388	A	T	Locus_31251.0|BlastHit|gi|141475|sp|P14381.1|YTX2_XENLA
14556	4671	G	A	Locus_31254.0|BlastHit|gi|334306359|sp|E6ZIJ1.1|HOIL1_DICLA
14556	5452	G	C	Locus_31254.0|BlastHit|gi|334306359|sp|E6ZIJ1.1|HOIL1_DICLA
14556	6130	C	T	Locus_31254.0|BlastHit|gi|334306359|sp|E6ZIJ1.1|HOIL1_DICLA
14556	6983	T	C	Locus_31254.0|BlastHit|gi|334306359|sp|E6ZIJ1.1|HOIL1_DICLA
14556	7156	C	G	Locus_31254.0|BlastHit|gi|334306359|sp|E6ZIJ1.1|HOIL1_DICLA
14556	7249	G	C	Locus_31254.0|BlastHit|gi|334306359|sp|E6ZIJ1.1|HOIL1_DICLA
14556	7504	C	G	Locus_31254.0|BlastHit|gi|334306359|sp|E6ZIJ1.1|HOIL1_DICLA
14556	7558	C	T	Locus_31254.0|BlastHit|gi|334306359|sp|E6ZIJ1.1|HOIL1_DICLA
14556	7849	C	A	Locus_31254.0|BlastHit|gi|334306359|sp|E6ZIJ1.1|HOIL1_DICLA
14556	8090	G	T	Locus_31254.0|BlastHit|gi|334306359|sp|E6ZIJ1.1|HOIL1_DICLA
14557	3474	A	T	Locus_31255.1|BlastHit|gi|126296|sp|P08548.1|LIN1_NYCCO
14557	5115	G	A	Locus_31255.1|BlastHit|gi|126296|sp|P08548.1|LIN1_NYCCO
14558	373	C	T	Locus_31256.0|BlastHit|gi|47605531|sp|Q964T2.1|CP9E2_BLAGE
14558	443	T	C,G	Locus_31256.0|BlastHit|gi|47605531|sp|Q964T2.1|CP9E2_BLAGE
14558	574	G	A	Locus_31256.0|BlastHit|gi|47605531|sp|Q964T2.1|CP9E2_BLAGE
14559	8491	G	A	Locus_31257.0|BlastHit|gi|152031623|sp|P02515.4|HSP22_DROME
14582	51	G	A	Locus_31288.0|BlastHit|gi|122143852|sp|Q2KHU8.1|IF2G_BOVIN
14637	60	C	A	Locus_31541.0|BlastHit|gi|110825729|sp|P05661.4|MYSA_DROME
14748	25	T	C	Locus_32504.0|BlastHit|gi|68565262|sp|Q96MD7.1|CI085_HUMAN
14748	60	G	A	Locus_32504.0|BlastHit|gi|68565262|sp|Q96MD7.1|CI085_HUMAN
1492	354	A	G	Locus_10547.0|BlastHit|gi|81904578|sp|Q9CZX9.1|TMM85_MOUSE
1503	363	C	T	Locus_10598.0|BlastHit|gi|544254|sp|P10768.2|ESTD_HUMAN
1611	709	G	A	Locus_11246.0|BlastHit|gi|82186659|sp|Q6P8E9.1|NH2L1_XENTR
1611	710	A	C	Locus_11246.0|BlastHit|gi|82186659|sp|Q6P8E9.1|NH2L1_XENTR
1628	314	G	C	Locus_11298.0|BlastHit|gi|548403|sp|P12694.2|ODBA_HUMAN
1635	1686	T	C	Locus_11343.0|BlastHit|gi|317373564|sp|Q8NHP7.4|EXD1_HUMAN
1640	64	C	G	Locus_11356.0|BlastHit|gi|82178079|sp|Q566Y8.1|MGN_DANRE
1655	100	G	A	Locus_11403.0|BlastHit|gi|341941282|sp|P43883.2|PLIN2_MOUSE
16627	167	T	C	Locus_16340.0_PREDICTED_uncharacterized_protein_LOC103524116_[Diaphorina_citri]
16627	311	A	C	Locus_16340.0_PREDICTED_uncharacterized_protein_LOC103524116_[Diaphorina_citri]
16627	514	A	G	Locus_16340.0_PREDICTED_uncharacterized_protein_LOC103524116_[Diaphorina_citri]
16627	618	C	T	Locus_16340.0_PREDICTED_uncharacterized_protein_LOC103524116_[Diaphorina_citri]
16627	638	A	T	Locus_16340.0_PREDICTED_uncharacterized_protein_LOC103524116_[Diaphorina_citri]
16627	688	C	T	Locus_16340.0_PREDICTED_uncharacterized_protein_LOC103524116_[Diaphorina_citri]
16627	690	G	A	Locus_16340.0_PREDICTED_uncharacterized_protein_LOC103524116_[Diaphorina_citri]
16627	850	G	A	Locus_16340.0_PREDICTED_uncharacterized_protein_LOC103524116_[Diaphorina_citri]
16650	268	A	G	Locus_16653.0_cyclin_H_[Penaeus_monodon]
16667	1187	C	A	Locus_16868.0_hypothetical_protein_LOTGIDRAFT_155782_[Lottia_gigantea]
16667	408	C	T	Locus_16868.0_hypothetical_protein_LOTGIDRAFT_155782_[Lottia_gigantea]
16700	103	G	T	Locus_17371.0_PREDICTED_uncharacterized_protein_LOC100868735_[Apis_florea]
16700	211	G	A	Locus_17371.0_PREDICTED_uncharacterized_protein_LOC100868735_[Apis_florea]
16700	658	G	T,C	Locus_17371.0_PREDICTED_uncharacterized_protein_LOC100868735_[Apis_florea]
16701	572	G	A	Locus_17393.0_hypothetical_protein_DAPPUDRAFT_315291_[Daphnia_pulex]
16702	130	A	C	Locus_17393.0_hypothetical_protein_DAPPUDRAFT_315291_[Daphnia_pulex]
16702	343	G	C,A	Locus_17393.0_hypothetical_protein_DAPPUDRAFT_315291_[Daphnia_pulex]
16707	400	G	A	Locus_17434.0_PREDICTED_hypothetical_protein_LOC721842_[Macaca_mulatta]
16748	1433	T	C	Locus_17939.0_PREDICTED_uncharacterized_protein_LOC101238939_[Hydra_vulgaris]
16748	1483	G	A	Locus_17939.0_PREDICTED_uncharacterized_protein_LOC101238939_[Hydra_vulgaris]
16748	1668	C	T	Locus_17939.0_PREDICTED_uncharacterized_protein_LOC101238939_[Hydra_vulgaris]
16748	1761	T	G	Locus_17939.0_PREDICTED_uncharacterized_protein_LOC101238939_[Hydra_vulgaris]
16748	1808	C	A	Locus_17939.0_PREDICTED_uncharacterized_protein_LOC101238939_[Hydra_vulgaris]
16748	1851	G	A	Locus_17939.0_PREDICTED_uncharacterized_protein_LOC101238939_[Hydra_vulgaris]
16748	221	G	A	Locus_17939.0_PREDICTED_uncharacterized_protein_LOC101238939_[Hydra_vulgaris]
16748	2262	T	C	Locus_17939.0_PREDICTED_uncharacterized_protein_LOC101238939_[Hydra_vulgaris]
16748	2392	A	G	Locus_17939.0_PREDICTED_uncharacterized_protein_LOC101238939_[Hydra_vulgaris]
16748	694	T	A	Locus_17939.0_PREDICTED_uncharacterized_protein_LOC101238939_[Hydra_vulgaris]
16748	752	T	C	Locus_17939.0_PREDICTED_uncharacterized_protein_LOC101238939_[Hydra_vulgaris]
16748	786	C	G	Locus_17939.0_PREDICTED_uncharacterized_protein_LOC101238939_[Hydra_vulgaris]
16775	793	C	G	Locus_18272.0_PREDICTED_uncharacterized_protein_LOC103512232_[Diaphorina_citri]
16793	427	A	C	Locus_18406.0_PREDICTED_DNA_damage-inducible_transcript_4-like_protein_isoform_X2_[Pelodiscus_sinensis]
1679	134	A	G	Locus_11471.0|BlastHit|gi|75060961|sp|Q5EA68.3|S61A1_BOVIN
16810	163	A	G	Locus_18607.0_cuticular_protein_hypothetical_28_precursor_[Bombyx_mori]
16826	1336	T	A	Locus_18751.0_PREDICTED_uncharacterized_protein_LOC101864244_isoform_X1_[Aplysia_californica]
16826	1337	A	T	Locus_18751.0_PREDICTED_uncharacterized_protein_LOC101864244_isoform_X1_[Aplysia_californica]
16826	778	A	G	Locus_18751.0_PREDICTED_uncharacterized_protein_LOC101864244_isoform_X1_[Aplysia_californica]
16838	807	C	G	Locus_18932.0_hypothetical_protein_L798_08062_[Zootermopsis_nevadensis]
16858	563	G	A	Locus_19126.0_hypothetical_protein_DAPPUDRAFT_299971_[Daphnia_pulex]
16858	608	C	T	Locus_19126.0_hypothetical_protein_DAPPUDRAFT_299971_[Daphnia_pulex]
16862	2098	G	A	Locus_19142.0_hypothetical_protein_DAPPUDRAFT_319650_[Daphnia_pulex]
16865	1110	G	T	Locus_19145.0_PREDICTED_estrogen_sulfotransferase_[Diaphorina_citri]
16865	903	T	C	Locus_19145.0_PREDICTED_estrogen_sulfotransferase_[Diaphorina_citri]
16945	1551	G	A	Locus_19992.0_PREDICTED_uncharacterized_protein_LOC100574845_[Acyrthosiphon_pisum]
16948	1009	C	T	Locus_20096.0_PREDICTED_NADH_dehydrogenase_[ubiquinone]_1_alpha_subcomplex_subunit_1-like_[Ceratitis_capitata]
16948	1085	G	A	Locus_20096.0_PREDICTED_NADH_dehydrogenase_[ubiquinone]_1_alpha_subcomplex_subunit_1-like_[Ceratitis_capitata]
16948	1766	T	C	Locus_20096.0_PREDICTED_NADH_dehydrogenase_[ubiquinone]_1_alpha_subcomplex_subunit_1-like_[Ceratitis_capitata]
16949	1656	T	C	Locus_20110.0_sulfotransferase_family_1E,_estrogen-preferring,_member_1_[Xenopus_laevis]
16949	1860	T	G	Locus_20110.0_sulfotransferase_family_1E,_estrogen-preferring,_member_1_[Xenopus_laevis]
16949	247	G	A	Locus_20110.0_sulfotransferase_family_1E,_estrogen-preferring,_member_1_[Xenopus_laevis]
16949	248	G	T	Locus_20110.0_sulfotransferase_family_1E,_estrogen-preferring,_member_1_[Xenopus_laevis]
16949	493	T	A	Locus_20110.0_sulfotransferase_family_1E,_estrogen-preferring,_member_1_[Xenopus_laevis]
16978	209	A	G	Locus_20342.0_PREDICTED_extensin-like_[Musca_domestica]
16978	434	G	A	Locus_20342.0_PREDICTED_extensin-like_[Musca_domestica]
16978	553	A	G	Locus_20342.0_PREDICTED_extensin-like_[Musca_domestica]
16978	574	T	A	Locus_20342.0_PREDICTED_extensin-like_[Musca_domestica]
16978	578	C	T	Locus_20342.0_PREDICTED_extensin-like_[Musca_domestica]
16978	642	A	T	Locus_20342.0_PREDICTED_extensin-like_[Musca_domestica]
16978	672	A	T	Locus_20342.0_PREDICTED_extensin-like_[Musca_domestica]
16978	751	A	C	Locus_20342.0_PREDICTED_extensin-like_[Musca_domestica]
16980	283	C	T	Locus_20382.0_hypothetical_protein_DAPPUDRAFT_316926_[Daphnia_pulex]
16980	290	T	C	Locus_20382.0_hypothetical_protein_DAPPUDRAFT_316926_[Daphnia_pulex]
16980	351	A	G	Locus_20382.0_hypothetical_protein_DAPPUDRAFT_316926_[Daphnia_pulex]
16991	413	C	T	Locus_20439.0_PREDICTED_nuclear_protein_MDM1_isoform_X4_[Tribolium_castaneum]
16992	190	T	C	Locus_20439.0_PREDICTED_nuclear_protein_MDM1_isoform_X4_[Tribolium_castaneum]
16992	286	T	C	Locus_20439.0_PREDICTED_nuclear_protein_MDM1_isoform_X4_[Tribolium_castaneum]
16995	504	C	T	Locus_20439.0_PREDICTED_nuclear_protein_MDM1_isoform_X4_[Tribolium_castaneum]
16995	507	C	T	Locus_20439.0_PREDICTED_nuclear_protein_MDM1_isoform_X4_[Tribolium_castaneum]
16997	333	G	A	Locus_20439.0_PREDICTED_nuclear_protein_MDM1_isoform_X4_[Tribolium_castaneum]
16997	369	C	T	Locus_20439.0_PREDICTED_nuclear_protein_MDM1_isoform_X4_[Tribolium_castaneum]
16997	533	A	C	Locus_20439.0_PREDICTED_nuclear_protein_MDM1_isoform_X4_[Tribolium_castaneum]
16997	538	G	T	Locus_20439.0_PREDICTED_nuclear_protein_MDM1_isoform_X4_[Tribolium_castaneum]
17002	554	T	C	Locus_20468.0_PREDICTED_separin_[Nasonia_vitripennis]
17025	1187	A	G	Locus_20630.0_putative_reverse_transcriptase_[Marsupenaeus_japonicus]
17028	402	A	C	Locus_20652.0_PREDICTED_protein_chibby_homolog_1_[Latimeria_chalumnae]
17028	490	C	T	Locus_20652.0_PREDICTED_protein_chibby_homolog_1_[Latimeria_chalumnae]
17034	3281	G	A	Locus_20735.0_PREDICTED_double-stranded_RNA-specific_editase_1_isoform_X2_[Nasonia_vitripennis]
17034	3975	G	T	Locus_20735.0_PREDICTED_double-stranded_RNA-specific_editase_1_isoform_X2_[Nasonia_vitripennis]
17046	505	A	C	Locus_20792.0_PREDICTED_uncharacterized_protein_K02A2.6-like_[Saccoglossus_kowalevskii]
17064	1349	C	G	Locus_20893.0_Techylectin-5B_[Zootermopsis_nevadensis]
17072	27	G	A	Locus_21019.0_PREDICTED_protein_sprint_isoform_X5_[Acyrthosiphon_pisum]
17072	31	A	G	Locus_21019.0_PREDICTED_protein_sprint_isoform_X5_[Acyrthosiphon_pisum]
17078	2067	A	G	Locus_21023.0_hypothetical_protein_X777_04091_[Cerapachys_biroi]
17083	304	G	A	Locus_21053.0_C-type_lectin_[Portunus_trituberculatus]
17098	654	T	C	Locus_21157.0_hypothetical_protein_L798_13163_[Zootermopsis_nevadensis]
17101	1727	A	G	Locus_21157.0_hypothetical_protein_L798_13163_[Zootermopsis_nevadensis]
17101	2249	T	G	Locus_21157.0_hypothetical_protein_L798_13163_[Zootermopsis_nevadensis]
17101	2513	A	T	Locus_21157.0_hypothetical_protein_L798_13163_[Zootermopsis_nevadensis]
17131	172	A	G	Locus_21332.0_PREDICTED_uncharacterized_protein_LOC103506484_[Diaphorina_citri]
17140	544	T	A	Locus_21446.0_putative_articulin_p60_[Rimicaris_exoculata]
17142	1008	A	T	Locus_21474.0_C-type_lectin_[Penaeus_monodon]
17142	1311	C	T	Locus_21474.0_C-type_lectin_[Penaeus_monodon]
17142	1941	G	A	Locus_21474.0_C-type_lectin_[Penaeus_monodon]
17143	114	G	A	Locus_21498.0_Organic_cation_transporter_protein_[Zootermopsis_nevadensis]
17144	182	T	G	Locus_21526.0_PREDICTED_cytoplasmic_dynein_2_heavy_chain_1-like_[Musca_domestica]
17145	178	C	T	Locus_21550.0_androgenic_gland_hormone-like_protein_[Macrobrachium_rosenbergii]
17145	82	T	A	Locus_21550.0_androgenic_gland_hormone-like_protein_[Macrobrachium_rosenbergii]
17149	802	G	T	Locus_21561.0_hypothetical_protein_L798_06943_[Zootermopsis_nevadensis]
17156	2008	A	C	Locus_21639.0_Histone-lysine_N-methyltransferase_SETMAR_[Camponotus_floridanus]
17156	948	G	A	Locus_21639.0_Histone-lysine_N-methyltransferase_SETMAR_[Camponotus_floridanus]
17166	1722	G	C	Locus_21686.0_JHE-like_carboxylesterase_2_[Pandalopsis_japonica]
17167	982	T	G	Locus_21686.0_JHE-like_carboxylesterase_1_[Pandalopsis_japonica]
1716	1323	A	G	Locus_11562.0|BlastHit|gi|1709447|sp|P52899.1|ODPA_CAEEL
17210	1158	T	C	Locus_21962.0_GJ11411_[Drosophila_virilis]
17226	1189	T	A	Locus_22080.0_hypothetical_protein_LOTGIDRAFT_228576_[Lottia_gigantea]
17226	1430	A	G	Locus_22080.0_hypothetical_protein_LOTGIDRAFT_228576_[Lottia_gigantea]
17240	120	C	T	Locus_22130.0_PREDICTED_paxillin-like_[Megachile_rotundata]
17240	180	C	A	Locus_22130.0_PREDICTED_paxillin-like_[Megachile_rotundata]
17240	363	A	C	Locus_22130.0_PREDICTED_paxillin-like_[Megachile_rotundata]
17240	438	A	T	Locus_22130.0_PREDICTED_paxillin-like_[Megachile_rotundata]
17243	2537	C	T	Locus_22130.0_PREDICTED_paxillin-like_isoform_X4_[Apis_dorsata]
17243	2544	T	A	Locus_22130.0_PREDICTED_paxillin-like_isoform_X4_[Apis_dorsata]
17243	2554	T	G	Locus_22130.0_PREDICTED_paxillin-like_isoform_X4_[Apis_dorsata]
17261	267	T	C	Locus_22229.0_roundabout_1,_2,_3,_putative_[Pediculus_humanus_corporis]
17262	2323	G	A	Locus_22233.2_unknown_[Dendroctonus_ponderosae]
17262	2449	C	A	Locus_22233.2_unknown_[Dendroctonus_ponderosae]
17262	2804	G	C	Locus_22233.2_unknown_[Dendroctonus_ponderosae]
17264	1458	C	G	Locus_22268.0_hypothetical_protein_L798_07231_[Zootermopsis_nevadensis]
17268	1252	T	C	Locus_22283.0_hypothetical_protein_DAPPUDRAFT_306009_[Daphnia_pulex]
17268	1354	T	C	Locus_22283.0_hypothetical_protein_DAPPUDRAFT_306009_[Daphnia_pulex]
17268	176	T	C	Locus_22283.0_hypothetical_protein_DAPPUDRAFT_306009_[Daphnia_pulex]
17273	277	T	G,A	Locus_22323.1_hypothetical_protein_DAPPUDRAFT_304124_[Daphnia_pulex]
17273	308	G	A	Locus_22323.1_hypothetical_protein_DAPPUDRAFT_304124_[Daphnia_pulex]
17273	566	G	A	Locus_22323.1_hypothetical_protein_DAPPUDRAFT_304124_[Daphnia_pulex]
17274	97	T	C	Locus_22324.0_hypothetical_protein_CGI_10014955_[Crassostrea_gigas]
17290	341	T	C	Locus_22465.0_hypothetical_protein_L798_01642_[Zootermopsis_nevadensis]
17292	2657	G	A	Locus_22471.0_hypothetical_protein_BRAFLDRAFT_72607_[Branchiostoma_floridae]
17292	2668	T	C	Locus_22471.0_hypothetical_protein_BRAFLDRAFT_72607_[Branchiostoma_floridae]
17296	1725	C	T	Locus_22515.0_PREDICTED_LOW_QUALITY_PROTEIN_protein_FAM65A_[Gorilla_gorilla_gorilla]
17296	1842	G	A	Locus_22515.0_PREDICTED_LOW_QUALITY_PROTEIN_protein_FAM65A_[Gorilla_gorilla_gorilla]
17296	1935	C	T	Locus_22515.0_PREDICTED_LOW_QUALITY_PROTEIN_protein_FAM65A_[Gorilla_gorilla_gorilla]
1729	1328	G	T	Locus_11596.0|BlastHit|gi|51701872|sp|Q7M767.3|UB2V2_RAT
17308	1286	G	C,T	Locus_22600.0_human_endogenous_retrovirus_H_element-like_protein_[marmosets,_New_World_monkey,_Peptide_Partial,_513_aa]
17308	501	C	A	Locus_22600.0_human_endogenous_retrovirus_H_element-like_protein_[marmosets,_New_World_monkey,_Peptide_Partial,_513_aa]
17308	966	A	C	Locus_22600.0_human_endogenous_retrovirus_H_element-like_protein_[marmosets,_New_World_monkey,_Peptide_Partial,_513_aa]
17309	1140	A	G	Locus_22607.0_predicted_protein_[Nematostella_vectensis]
17309	1367	G	A	Locus_22607.0_predicted_protein_[Nematostella_vectensis]
17309	1376	C	A	Locus_22607.0_predicted_protein_[Nematostella_vectensis]
17309	1411	A	G	Locus_22607.0_predicted_protein_[Nematostella_vectensis]
17309	2418	C	T	Locus_22607.0_predicted_protein_[Nematostella_vectensis]
17309	3240	A	G	Locus_22607.0_predicted_protein_[Nematostella_vectensis]
17324	2123	C	G	Locus_22763.0_PREDICTED_uncharacterized_protein_LOC103524984_[Diaphorina_citri]
17328	509	G	C	Locus_22799.0_C-type_lectin_[Portunus_trituberculatus]
17335	158	G	A	Locus_22833.0_antiviral_protein_[Litopenaeus_vannamei]
17335	159	A	G	Locus_22833.0_antiviral_protein_[Litopenaeus_vannamei]
17337	664	C	T	Locus_22835.0_hypothetical_protein_YQE_07341,_partial_[Dendroctonus_ponderosae]
17337	904	G	A	Locus_22835.0_hypothetical_protein_YQE_07341,_partial_[Dendroctonus_ponderosae]
17346	122	A	G	Locus_22906.0_PREDICTED_uncharacterized_protein_C7orf73-like_[Musca_domestica]
17352	1198	G	T	Locus_22949.0_PREDICTED_MAP7_domain-containing_protein_1-like_isoform_X3_[Tribolium_castaneum]
17356	35	G	C	Locus_22949.0_hypothetical_protein_L798_12523,_partial_[Zootermopsis_nevadensis]
17357	2481	G	C	Locus_22949.0_PREDICTED_histone-lysine_N-methyltransferase,_H3_lysine-79_specific_isoform_X15_[Apis_mellifera]
17357	2795	G	A	Locus_22949.0_PREDICTED_histone-lysine_N-methyltransferase,_H3_lysine-79_specific_isoform_X15_[Apis_mellifera]
17357	3184	G	A	Locus_22949.0_PREDICTED_histone-lysine_N-methyltransferase,_H3_lysine-79_specific_isoform_X15_[Apis_mellifera]
17357	3261	T	A	Locus_22949.0_PREDICTED_histone-lysine_N-methyltransferase,_H3_lysine-79_specific_isoform_X15_[Apis_mellifera]
17357	3326	G	A	Locus_22949.0_PREDICTED_histone-lysine_N-methyltransferase,_H3_lysine-79_specific_isoform_X15_[Apis_mellifera]
17412	1206	A	G	Locus_23357.0_G_protein_suppressor_2_[Litopenaeus_vannamei]
17422	4413	G	A	Locus_23463.0_C-type_lectin_1_[Scylla_paramamosain]
17422	4428	A	G	Locus_23463.0_C-type_lectin_1_[Scylla_paramamosain]
17444	1079	A	C	Locus_23649.0_phosphoenolpyruvate_carboxykinase_[Cherax_quadricarinatus]
17444	238	C	T	Locus_23649.0_phosphoenolpyruvate_carboxykinase_[Cherax_quadricarinatus]
17454	3284	G	T	Locus_23734.0_hypothetical_protein_DAPPUDRAFT_209471_[Daphnia_pulex]
17455	1771	T	A	Locus_23739.0_conserved_hypothetical_protein_[Ixodes_scapularis]
17455	2133	A	G	Locus_23739.0_conserved_hypothetical_protein_[Ixodes_scapularis]
17456	645	A	T	Locus_23758.0_GM26456_[Drosophila_sechellia]
17461	1569	G	A	Locus_23798.0_fortilin_binding_protein_1_[Penaeus_monodon]
17461	2234	T	C	Locus_23798.0_fortilin_binding_protein_1_[Penaeus_monodon]
17461	2259	G	T	Locus_23798.0_fortilin_binding_protein_1_[Penaeus_monodon]
17461	299	C	T	Locus_23798.0_fortilin_binding_protein_1_[Penaeus_monodon]
17461	312	T	C	Locus_23798.0_fortilin_binding_protein_1_[Penaeus_monodon]
17461	345	T	G	Locus_23798.0_fortilin_binding_protein_1_[Penaeus_monodon]
17461	362	G	T	Locus_23798.0_fortilin_binding_protein_1_[Penaeus_monodon]
17461	755	C	T	Locus_23798.0_fortilin_binding_protein_1_[Penaeus_monodon]
17461	98	A	C	Locus_23798.0_fortilin_binding_protein_1_[Penaeus_monodon]
17462	505	C	A	Locus_23799.0_PREDICTED_IQ_motif_and_SEC7_domain-containing_protein_2_[Alligator_mississippiensis]
17466	1067	C	A	Locus_23871.0_mannose-binding_protein_[Procambarus_clarkii]
17466	1453	G	A	Locus_23871.0_mannose-binding_protein_[Procambarus_clarkii]
17466	1468	T	G	Locus_23871.0_mannose-binding_protein_[Procambarus_clarkii]
17466	1564	A	G	Locus_23871.0_mannose-binding_protein_[Procambarus_clarkii]
17466	1603	C	T	Locus_23871.0_mannose-binding_protein_[Procambarus_clarkii]
17466	1639	C	T	Locus_23871.0_mannose-binding_protein_[Procambarus_clarkii]
17466	1681	A	G	Locus_23871.0_mannose-binding_protein_[Procambarus_clarkii]
17466	529	C	A	Locus_23871.0_mannose-binding_protein_[Procambarus_clarkii]
17466	555	T	A	Locus_23871.0_mannose-binding_protein_[Procambarus_clarkii]
17466	962	C	A	Locus_23871.0_mannose-binding_protein_[Procambarus_clarkii]
17481	1399	A	T	Locus_23924.0_Protein_T20F5.6_[Caenorhabditis_elegans]
17491	753	A	G,T	Locus_24086.0_antimicrobial_peptide_type_2_precursor_IIc_[Pandalopsis_japonica]
17499	2925	T	G	Locus_24181.0_GI11032_[Drosophila_mojavensis]
17499	3069	G	A	Locus_24181.0_GI11032_[Drosophila_mojavensis]
17499	3234	T	C	Locus_24181.0_GI11032_[Drosophila_mojavensis]
1749	361	C	A	Locus_11653.0|BlastHit|gi|47117653|sp|P61165.1|CK010_HUMAN
17507	1279	G	T	Locus_24239.0_eukaryotic_protein_of_unknown_function,_partial_[Coptotermes_formosanus]
17507	2318	T	C	Locus_24239.0_eukaryotic_protein_of_unknown_function,_partial_[Coptotermes_formosanus]
17511	213	A	G	Locus_24267.0_hypothetical_protein_D910_05915_[Dendroctonus_ponderosae]
17511	276	C	A	Locus_24267.0_hypothetical_protein_D910_05915_[Dendroctonus_ponderosae]
17511	316	C	T	Locus_24267.0_hypothetical_protein_D910_05915_[Dendroctonus_ponderosae]
17542	1160	A	C,G,T	Locus_24405.0_hypothetical_protein_UY3_07672_[Chelonia_mydas]
17543	809	C	T	Locus_24405.0_PREDICTED_oleosin-B4-like_[Homo_sapiens]
17554	847	G	A,C	Locus_24466.0_hypothetical_protein_KGM_13606_[Danaus_plexippus]
17554	934	G	A	Locus_24466.0_hypothetical_protein_KGM_13606_[Danaus_plexippus]
17555	1228	C	A	Locus_24467.0_hypothetical_protein_L798_03949_[Zootermopsis_nevadensis]
17555	1350	A	G	Locus_24467.0_hypothetical_protein_L798_03949_[Zootermopsis_nevadensis]
17555	2329	A	T	Locus_24467.0_hypothetical_protein_L798_03949_[Zootermopsis_nevadensis]
17555	552	A	C	Locus_24467.0_hypothetical_protein_L798_03949_[Zootermopsis_nevadensis]
17562	416	T	C	Locus_24499.0_Mitogen-activated_protein_kinase_kinase_kinase_7-interacting_protein_2_[Harpegnathos_saltator]
17580	2218	A	T	Locus_24614.0_unnamed_protein_product_[Oikopleura_dioica]
17582	76	A	G	Locus_24614.0_pG1_protein_-_human_(fragment)
17592	153	A	C,T	Locus_24679.0_insulin-like_growth_factor_binding_protein_7-like_protein_[Cherax_quadricarinatus]
17592	60	A	G	Locus_24679.0_insulin-like_growth_factor_binding_protein_7-like_protein_[Cherax_quadricarinatus]
17592	66	C	A,T	Locus_24679.0_insulin-like_growth_factor_binding_protein_7-like_protein_[Cherax_quadricarinatus]
17620	175	A	G	Locus_24842.0_pG1_protein_-_human_(fragment)
17620	538	C	G	Locus_24842.0_pG1_protein_-_human_(fragment)
17643	1725	G	A	Locus_24959.0_hypothetical_protein_DAPPUDRAFT_100919_[Daphnia_pulex]
17657	2134	C	T	Locus_25075.0_hypothetical_protein_Phum_PHUM155170_[Pediculus_humanus_corporis]
17657	2188	T	C	Locus_25075.0_hypothetical_protein_Phum_PHUM155170_[Pediculus_humanus_corporis]
17657	769	G	C	Locus_25075.0_hypothetical_protein_Phum_PHUM155170_[Pediculus_humanus_corporis]
17701	2342	A	G	Locus_25503.0_PREDICTED_uncharacterized_protein_LOC101863835_isoform_X1_[Aplysia_californica]
17710	2132	C	T	Locus_25518.0_PREDICTED_uncharacterized_protein_LOC100899344_[Metaseiulus_occidentalis]
17710	296	C	G	Locus_25518.0_PREDICTED_uncharacterized_protein_LOC100899344_[Metaseiulus_occidentalis]
17710	299	C	T	Locus_25518.0_PREDICTED_uncharacterized_protein_LOC100899344_[Metaseiulus_occidentalis]
17710	555	C	A	Locus_25518.0_PREDICTED_uncharacterized_protein_LOC100899344_[Metaseiulus_occidentalis]
17710	721	A	C	Locus_25518.0_PREDICTED_uncharacterized_protein_LOC100899344_[Metaseiulus_occidentalis]
17710	736	C	A	Locus_25518.0_PREDICTED_uncharacterized_protein_LOC100899344_[Metaseiulus_occidentalis]
17727	798	C	T	Locus_25547.0_hypothetical_protein_LOTGIDRAFT_235292_[Lottia_gigantea]
17728	1022	A	C	Locus_25547.0_hypothetical_protein_LOTGIDRAFT_235292_[Lottia_gigantea]
17728	1726	C	A	Locus_25547.0_hypothetical_protein_LOTGIDRAFT_235292_[Lottia_gigantea]
17738	519	C	T	Locus_25654.1_PREDICTED_biorientation_of_chromosomes_in_cell_division_protein_1-like_1_isoform_X3_[Callorhinchus_milii]
17748	1120	G	C	Locus_25723.0_PREDICTED_rho_GTPase-activating_protein_28-like_[Megachile_rotundata]
17748	347	C	T	Locus_25723.0_PREDICTED_rho_GTPase-activating_protein_28-like_[Megachile_rotundata]
17748	3748	C	T	Locus_25723.0_PREDICTED_rho_GTPase-activating_protein_28-like_[Megachile_rotundata]
17776	2727	A	G	Locus_25790.0_PREDICTED_plasma_kallikrein_[Odobenus_rosmarus_divergens]
17776	2728	C	T	Locus_25790.0_PREDICTED_plasma_kallikrein_[Odobenus_rosmarus_divergens]
17776	3285	T	C	Locus_25790.0_PREDICTED_plasma_kallikrein_[Odobenus_rosmarus_divergens]
17795	2352	T	G	Locus_25860.1_hypothetical_protein_YQE_07915,_partial_[Dendroctonus_ponderosae]
17795	2439	G	A	Locus_25860.1_hypothetical_protein_YQE_07915,_partial_[Dendroctonus_ponderosae]
17795	2447	A	G	Locus_25860.1_hypothetical_protein_YQE_07915,_partial_[Dendroctonus_ponderosae]
17805	219	T	C	Locus_25908.0_PREDICTED_uncharacterized_protein_LOC101894671_isoform_X1_[Musca_domestica]
17807	1216	G	A	Locus_25922.0_cuticle_protein_[Rimicaris_exoculata]
17807	1522	T	G	Locus_25922.0_cuticle_protein_[Rimicaris_exoculata]
17807	453	T	G	Locus_25922.0_cuticle_protein_[Rimicaris_exoculata]
17807	4818	T	C	Locus_25922.0_cuticle_protein_[Rimicaris_exoculata]
17807	546	A	C	Locus_25922.0_cuticle_protein_[Rimicaris_exoculata]
17820	290	G	T,C	Locus_25997.0_unnamed_protein_product_[Oikopleura_dioica]
17820	374	C	T	Locus_25997.0_unnamed_protein_product_[Oikopleura_dioica]
17837	6393	T	C	Locus_26099.0_thymosin-repeated_protein_2_[Eriocheir_sinensis]
17839	2380	C	T	Locus_26099.0_beta-thymosin_5_[Pacifastacus_leniusculus]
17839	2545	G	A	Locus_26099.0_beta-thymosin_5_[Pacifastacus_leniusculus]
17865	2466	G	A	Locus_26114.0_PREDICTED_serum_response_factor-binding_protein_1_isoform_X1_[Anolis_carolinensis]
17865	2730	C	T	Locus_26114.0_PREDICTED_serum_response_factor-binding_protein_1_isoform_X1_[Anolis_carolinensis]
17865	3206	T	C	Locus_26114.0_PREDICTED_serum_response_factor-binding_protein_1_isoform_X1_[Anolis_carolinensis]
17865	3281	G	T	Locus_26114.0_PREDICTED_serum_response_factor-binding_protein_1_isoform_X1_[Anolis_carolinensis]
1786	2369	T	C	Locus_11762.0|BlastHit|gi|729704|sp|Q04832.1|HEXP_LEIMA
17882	111	C	A	Locus_26248.0_PREDICTED_COMM_domain-containing_protein_5-like_[Python_bivittatus]
17882	47	T	G	Locus_26248.0_PREDICTED_COMM_domain-containing_protein_5-like_[Python_bivittatus]
17902	635	A	G	Locus_26391.0_PREDICTED_uncharacterized_protein_LOC100892654_[Strongylocentrotus_purpuratus]
17903	111	T	A	Locus_26391.0_PREDICTED_uncharacterized_protein_LOC100367271_[Saccoglossus_kowalevskii]
17903	539	T	C	Locus_26391.0_PREDICTED_uncharacterized_protein_LOC100367271_[Saccoglossus_kowalevskii]
17904	6427	A	T	Locus_26398.0_chitin_deacetylase_9_precursor_[Tribolium_castaneum]
17910	1533	G	A	Locus_26429.0_putative_tyrosine_phosphatase_(truncated)_[Heliconius_melpomene]
17910	2610	C	G	Locus_26429.0_putative_tyrosine_phosphatase_(truncated)_[Heliconius_melpomene]
17910	2901	T	C	Locus_26429.0_putative_tyrosine_phosphatase_(truncated)_[Heliconius_melpomene]
17910	3514	C	A	Locus_26429.0_putative_tyrosine_phosphatase_(truncated)_[Heliconius_melpomene]
17910	3678	T	A	Locus_26429.0_putative_tyrosine_phosphatase_(truncated)_[Heliconius_melpomene]
17910	3942	T	C	Locus_26429.0_putative_tyrosine_phosphatase_(truncated)_[Heliconius_melpomene]
17910	4081	A	G	Locus_26429.0_putative_tyrosine_phosphatase_(truncated)_[Heliconius_melpomene]
17910	4305	A	G	Locus_26429.0_putative_tyrosine_phosphatase_(truncated)_[Heliconius_melpomene]
17910	4362	G	C	Locus_26429.0_putative_tyrosine_phosphatase_(truncated)_[Heliconius_melpomene]
17910	4409	C	T	Locus_26429.0_putative_tyrosine_phosphatase_(truncated)_[Heliconius_melpomene]
17910	4970	C	G	Locus_26429.0_putative_tyrosine_phosphatase_(truncated)_[Heliconius_melpomene]
17910	5061	G	A	Locus_26429.0_putative_tyrosine_phosphatase_(truncated)_[Heliconius_melpomene]
17910	5550	G	A	Locus_26429.0_putative_tyrosine_phosphatase_(truncated)_[Heliconius_melpomene]
17910	5738	A	G	Locus_26429.0_putative_tyrosine_phosphatase_(truncated)_[Heliconius_melpomene]
17910	5792	C	T	Locus_26429.0_putative_tyrosine_phosphatase_(truncated)_[Heliconius_melpomene]
17911	1484	A	G	Locus_26429.0_cytokine_receptor_[Scylla_paramamosain]
17911	1562	A	G	Locus_26429.0_cytokine_receptor_[Scylla_paramamosain]
17911	2031	G	A	Locus_26429.0_cytokine_receptor_[Scylla_paramamosain]
17911	2366	C	T	Locus_26429.0_cytokine_receptor_[Scylla_paramamosain]
17911	833	G	A	Locus_26429.0_cytokine_receptor_[Scylla_paramamosain]
17911	850	C	T	Locus_26429.0_cytokine_receptor_[Scylla_paramamosain]
1793	1453	C	A	Locus_11775.0|BlastHit|gi|172046654|sp|P63300.3|SELW_MOUSE
1793	308	G	A	Locus_11775.0|BlastHit|gi|172046654|sp|P63300.3|SELW_MOUSE
1827	2113	G	A	Locus_11878.0|BlastHit|gi|45593362|sp|O61661.2|CHK1_DROME
1838	1087	A	T	Locus_11904.0|BlastHit|gi|31076619|sp|Q8UWA5.3|CAH2_TRIHK
1838	534	A	G	Locus_11904.0|BlastHit|gi|31076619|sp|Q8UWA5.3|CAH2_TRIHK
1847	105	A	T	Locus_11923.0|BlastHit|gi|81900250|sp|Q8CFE2.1|CD027_MOUSE
1863	1178	T	C	Locus_11965.0|BlastHit|gi|74739637|sp|O75935.1|DCTN3_HUMAN
1863	623	T	A	Locus_11965.0|BlastHit|gi|74739637|sp|O75935.1|DCTN3_HUMAN
1863	991	G	A	Locus_11965.0|BlastHit|gi|74739637|sp|O75935.1|DCTN3_HUMAN
1865	229	A	G	Locus_11967.0|BlastHit|gi|12643724|sp|Q13873.2|BMPR2_HUMAN
1874	507	G	C	Locus_11985.0|BlastHit|gi|162416206|sp|A4FUP9.2|GL1D1_MOUSE
1876	1453	A	T	Locus_11992.0|BlastHit|gi|41688549|sp|Q8WQA4.2|EXC4_CAEEL
1878	635	C	T	Locus_12003.0|BlastHit|gi|218511884|sp|Q00341.2|VIGLN_HUMAN
19112	52	A	T	Locus_32580.0_hypothetical_protein_LOTGIDRAFT_231693_[Lottia_gigantea]
19112	53	A	G	Locus_32580.0_hypothetical_protein_LOTGIDRAFT_231693_[Lottia_gigantea]
19143	108	T	C	Locus_33064.0_PREDICTED_galactosylceramide_sulfotransferase-like_[Strongylocentrotus_purpuratus]
19301	203	C	T	Locus_35262.0_PREDICTED_metabotropic_glutamate_receptor-like_[Bombus_impatiens]
19324	243	G	T	Locus_35510.0_hypothetical_protein_CAPTEDRAFT_224196_[Capitella_teleta]
19470	51	G	A	Locus_37549.0_hypothetical_protein_X777_03876_[Cerapachys_biroi]
19489	25	A	G	Locus_37790.0_hypothetical_protein_SINV_00636_[Solenopsis_invicta]
19514	628	A	G	Locus_38025.0_PREDICTED_uncharacterized_protein_LOC101848887_[Aplysia_californica]
19556	26	T	C	Locus_38555.0_PREDICTED_uncharacterized_protein_LOC101737182_[Bombyx_mori]
19556	29	G	A	Locus_38555.0_PREDICTED_uncharacterized_protein_LOC101737182_[Bombyx_mori]
19556	32	T	C	Locus_38555.0_PREDICTED_uncharacterized_protein_LOC101737182_[Bombyx_mori]
19556	34	A	T	Locus_38555.0_PREDICTED_uncharacterized_protein_LOC101737182_[Bombyx_mori]
19556	37	A	G	Locus_38555.0_PREDICTED_uncharacterized_protein_LOC101737182_[Bombyx_mori]
19556	40	T	C	Locus_38555.0_PREDICTED_uncharacterized_protein_LOC101737182_[Bombyx_mori]
19556	60	A	T	Locus_38555.0_PREDICTED_uncharacterized_protein_LOC101737182_[Bombyx_mori]
19556	61	A	C	Locus_38555.0_PREDICTED_uncharacterized_protein_LOC101737182_[Bombyx_mori]
19557	27	A	G	Locus_38563.0_Hypothetical_protein_CBG13367_[Caenorhabditis_briggsae]
19613	205	C	T	Locus_39285.0_hypothetical_protein_M91_00313,_partial_[Bos_mutus]
19613	208	T	G	Locus_39285.0_hypothetical_protein_M91_00313,_partial_[Bos_mutus]
19666	229	C	A	Locus_39770.0_PREDICTED_uncharacterized_protein_LOC100899779_[Metaseiulus_occidentalis]
19735	188	G	A	Locus_40569.0_PREDICTED_platelet_glycoprotein_Ib_alpha_chain-like_isoform_X2_[Gallus_gallus]
19735	427	G	T	Locus_40569.0_PREDICTED_platelet_glycoprotein_Ib_alpha_chain-like_isoform_X2_[Gallus_gallus]
19773	30	G	A,T	Locus_41120.0_Metabotropic_glutamate_receptor_5_[Zootermopsis_nevadensis]
19773	36	G	A	Locus_41120.0_Metabotropic_glutamate_receptor_5_[Zootermopsis_nevadensis]
19895	1301	A	T	Locus_42815.0_PREDICTED_RNA-directed_DNA_polymerase_from_mobile_element_jockey-like,_partial_[Saccoglossus_kowalevskii]
19984	1500	C	T	Locus_43962.0_PREDICTED_LOW_QUALITY_PROTEIN_1-phosphatidylinositol_4,5-bisphosphate_phosphodiesterase_epsilon-1-like,_partial_[Diaphorina_citri]
20001	299	A	G	Locus_44362.0_ACYPI002520_[Acyrthosiphon_pisum]
20004	4362	T	A	Locus_44408.0_JHE-like_carboxylesterase_1_[Pandalopsis_japonica]
20011	556	C	T	Locus_44478.0_hypothetical_protein_L798_00220_[Zootermopsis_nevadensis]
20012	384	T	C	Locus_44487.0_t_complex_protein_[Aedes_aegypti]
20012	483	A	G	Locus_44487.0_t_complex_protein_[Aedes_aegypti]
20089	160	G	A	Locus_1265.0_tachylectin_[Macrobrachium_rosenbergii]
20117	1043	A	T	Locus_1741.0_hypothetical_protein_HELRODRAFT_162817_[Helobdella_robusta]
20124	700	G	A	Locus_1806.0_hypothetical_protein_AaeL_AAEL009595_[Aedes_aegypti]
20139	244	G	A	Locus_2055.0_hypothetical_protein_EAI_07730_[Harpegnathos_saltator]
20150	669	T	C	Locus_2179.0_hypothetical_protein_TcasGA2_TC001918_[Tribolium_castaneum]
20151	1152	A	G	Locus_2195.0_PREDICTED_zinc_finger_X-chromosomal_protein_[Ornithorhynchus_anatinus]
20154	636	A	G	Locus_2265.0_PREDICTED_protein_MMS22-like_[Xenopus_(Silurana)_tropicalis]
20198	2913	G	A	Locus_2968.0_zinc_finger_protein_585A_[Culex_quinquefasciatus]
20212	411	A	G	Locus_3231.0_PREDICTED_uncharacterized_protein_LOC100166234_[Acyrthosiphon_pisum]
20244	427	A	G	Locus_3858.0_PREDICTED_neurogenic_differentiation_factor_1-like_[Metaseiulus_occidentalis]
20252	371	A	T	Locus_4025.0_RING_finger_protein_207_[Acromyrmex_echinatior]
20252	389	A	G	Locus_4025.0_RING_finger_protein_207_[Acromyrmex_echinatior]
20252	41	T	C	Locus_4025.0_RING_finger_protein_207_[Acromyrmex_echinatior]
20252	62	G	A	Locus_4025.0_RING_finger_protein_207_[Acromyrmex_echinatior]
20273	1075	G	A	Locus_4550.0_crustin-like_protein_[Litopenaeus_vannamei]
20305	205	C	A	Locus_5044.0_atonal_[Glomeris_marginata]
20313	1259	A	T	Locus_5251.0_hypothetical_protein_IscW_ISCW018345_[Ixodes_scapularis]
20334	1062	A	G	Locus_5730.0_hypothetical_protein_DAPPUDRAFT_247893_[Daphnia_pulex]
20336	516	G	A	Locus_5758.0_hypothetical_protein_Phum_PHUM582420_[Pediculus_humanus_corporis]
20336	548	G	A	Locus_5758.0_hypothetical_protein_Phum_PHUM582420_[Pediculus_humanus_corporis]
20337	167	T	G	Locus_5769.0_PREDICTED_uncharacterized_protein_LOC100889358_isoform_1_[Strongylocentrotus_purpuratus]
20337	321	G	A	Locus_5769.0_PREDICTED_uncharacterized_protein_LOC100889358_isoform_1_[Strongylocentrotus_purpuratus]
20338	46	A	C,G	Locus_5774.0_hypothetical_protein_DAPPUDRAFT_50816_[Daphnia_pulex]
20351	480	C	T	Locus_5963.0_PREDICTED_uncharacterized_protein_LOC101743729_[Bombyx_mori]
20386	1174	C	T	Locus_6812.0_hypothetical_protein_EAI_16569_[Harpegnathos_saltator]
20386	857	C	A	Locus_6812.0_hypothetical_protein_EAI_16569_[Harpegnathos_saltator]
20387	690	T	C	Locus_6831.0_serine_protease-like_protein_[Fenneropenaeus_chinensis]
20387	693	T	A	Locus_6831.0_serine_protease-like_protein_[Fenneropenaeus_chinensis]
20387	903	A	T	Locus_6831.0_serine_protease-like_protein_[Fenneropenaeus_chinensis]
20387	980	T	A	Locus_6831.0_serine_protease-like_protein_[Fenneropenaeus_chinensis]
20387	994	G	A	Locus_6831.0_serine_protease-like_protein_[Fenneropenaeus_chinensis]
20388	186	T	A	Locus_6849.0_GJ11778_[Drosophila_virilis]
20388	282	C	T	Locus_6849.0_GJ11778_[Drosophila_virilis]
20390	250	T	G	Locus_6955.0_glycosyltransferase_[Bombyx_mori]
20393	182	C	T	Locus_7012.0_PREDICTED_hypothetical_protein_LOC100636503_[Amphimedon_queenslandica]
20403	127	T	C	Locus_7221.0_PREDICTED_glycine-rich_cell_wall_structural_protein_1.8_[Nasonia_vitripennis]
20449	84	T	C	Locus_8227.0_hypothetical_protein_TcasGA2_TC002170_[Tribolium_castaneum]
20488	1374	C	T	Locus_9183.0_PREDICTED_uncharacterized_protein_LOC101856219_[Aplysia_californica]
20488	1628	T	C	Locus_9183.0_PREDICTED_uncharacterized_protein_LOC101856219_[Aplysia_californica]
20488	1643	A	G	Locus_9183.0_PREDICTED_uncharacterized_protein_LOC101856219_[Aplysia_californica]
20488	2129	A	T	Locus_9183.0_PREDICTED_uncharacterized_protein_LOC101856219_[Aplysia_californica]
20508	771	C	T	Locus_9560.0_hypothetical_protein_BRAFLDRAFT_88421_[Branchiostoma_floridae]
20510	512	G	A	Locus_9580.0_unknown_[Dendroctonus_ponderosae]
20530	1409	G	A	Locus_10052.0_Sine_oculis-binding_protein-like_protein_[Zootermopsis_nevadensis]
20530	1591	G	A	Locus_10052.0_Sine_oculis-binding_protein-like_protein_[Zootermopsis_nevadensis]
20532	278	T	C	Locus_10119.0_reverse_transcriptase,_partial_[Penaeus_monodon]
20535	240	T	A	Locus_10158.0_distal-less_[Parhyale_hawaiensis]
20535	253	T	C	Locus_10158.0_distal-less_[Parhyale_hawaiensis]
20535	267	A	G	Locus_10158.0_distal-less_[Parhyale_hawaiensis]
20535	271	G	T	Locus_10158.0_distal-less_[Parhyale_hawaiensis]
20535	329	T	C	Locus_10158.0_distal-less_[Parhyale_hawaiensis]
20535	476	G	T	Locus_10158.0_distal-less_[Parhyale_hawaiensis]
20538	705	T	C	Locus_10211.0_PREDICTED_RNA-directed_DNA_polymerase_from_mobile_element_jockey-like_[Acyrthosiphon_pisum]
20539	546	G	A	Locus_10227.0_hypothetical_protein_L798_13955_[Zootermopsis_nevadensis]
20539	699	T	C	Locus_10227.0_hypothetical_protein_L798_13955_[Zootermopsis_nevadensis]
20560	271	G	A	Locus_10488.0_PREDICTED_hypothetical_protein_LOC100749916_[Bombus_impatiens]
20560	362	A	C	Locus_10488.0_PREDICTED_hypothetical_protein_LOC100749916_[Bombus_impatiens]
20560	524	G	A	Locus_10488.0_PREDICTED_hypothetical_protein_LOC100749916_[Bombus_impatiens]
20560	526	A	C	Locus_10488.0_PREDICTED_hypothetical_protein_LOC100749916_[Bombus_impatiens]
20566	162	G	A	Locus_10570.0_unnamed_protein_product_[Homo_sapiens]
20566	205	C	G	Locus_10570.0_unnamed_protein_product_[Homo_sapiens]
20566	225	G	A	Locus_10570.0_unnamed_protein_product_[Homo_sapiens]
20585	857	C	G	Locus_10919.0_PREDICTED_uncharacterized_protein_LOC103520587_[Diaphorina_citri]
20585	863	G	T	Locus_10919.0_PREDICTED_uncharacterized_protein_LOC103520587_[Diaphorina_citri]
20586	478	C	G	Locus_10919.1_PREDICTED_uncharacterized_protein_LOC103524541_[Diaphorina_citri]
20589	163	G	C	Locus_11016.0_PREDICTED_SERTA_domain-containing_protein_2_[Diaphorina_citri]
20589	337	A	G	Locus_11016.0_PREDICTED_SERTA_domain-containing_protein_2_[Diaphorina_citri]
20611	548	C	T	Locus_11326.0_hypothetical_protein_IscW_ISCW010753_[Ixodes_scapularis]
20621	308	A	G	Locus_11469.0_hypothetical_protein_LOAG_00594_[Loa_loa]
20621	416	C	T	Locus_11469.0_hypothetical_protein_LOAG_00594_[Loa_loa]
20621	71	C	G	Locus_11469.0_hypothetical_protein_LOAG_00594_[Loa_loa]
20625	415	T	C	Locus_11570.0_PREDICTED_protein_couch_potato-like_isoform_X6_[Apis_mellifera]
20625	732	A	C	Locus_11570.0_PREDICTED_protein_couch_potato-like_isoform_X6_[Apis_mellifera]
20626	651	T	C	Locus_11576.0_hypothetical_protein_YQE_05919,_partial_[Dendroctonus_ponderosae]
20652	438	C	T	Locus_12006.0_pol_polyprotein_[Drosophila_melanogaster]
20656	199	G	A	Locus_12080.0_hypothetical_protein_BRAFLDRAFT_146669_[Branchiostoma_floridae]
20656	523	C	T	Locus_12080.0_hypothetical_protein_BRAFLDRAFT_146669_[Branchiostoma_floridae]
20659	224	C	T	Locus_12174.0_hypothetical_protein_L798_09799,_partial_[Zootermopsis_nevadensis]
20659	741	T	C	Locus_12174.0_hypothetical_protein_L798_09799,_partial_[Zootermopsis_nevadensis]
20666	229	T	A	Locus_12341.0_putative_serine_proteinase_inhibitor_[Pacifastacus_leniusculus]
20666	692	A	T	Locus_12341.0_putative_serine_proteinase_inhibitor_[Pacifastacus_leniusculus]
20673	351	C	T	Locus_12415.0_cuticle_protein_precursor_[Acyrthosiphon_pisum]
20676	1256	G	C	Locus_12462.0_hypothetical_protein_EGK_02078_[Macaca_mulatta]
20714	1376	C	A	Locus_13097.0_PREDICTED_uncharacterized_protein_LOC103515696_[Diaphorina_citri]
20767	282	T	C	Locus_13970.0_hypothetical_protein_BRAFLDRAFT_210513_[Branchiostoma_floridae]
20775	219	A	C	Locus_14133.0_hypothetical_protein_L798_12863_[Zootermopsis_nevadensis]
20775	238	A	T	Locus_14133.0_hypothetical_protein_L798_12863_[Zootermopsis_nevadensis]
20775	262	A	T	Locus_14133.0_hypothetical_protein_L798_12863_[Zootermopsis_nevadensis]
20810	28	A	C,T	Locus_14572.0_PREDICTED_uncharacterized_protein_LOC103515667_isoform_X2_[Diaphorina_citri]
20835	875	G	A	Locus_14929.0_hypothetical_protein_EAG_11568_[Camponotus_floridanus]
20850	388	G	C	Locus_15124.0_PREDICTED_uncharacterized_protein_LOC103312373_[Tribolium_castaneum]
20856	1123	C	A	Locus_15189.0_pol-like_protein_[Biomphalaria_glabrata]
20856	587	T	C	Locus_15189.0_pol-like_protein_[Biomphalaria_glabrata]
20856	882	A	G	Locus_15189.0_pol-like_protein_[Biomphalaria_glabrata]
20860	482	A	T	Locus_15247.0_PREDICTED_E3_ubiquitin-protein_ligase_TRIM56-like_[Lepisosteus_oculatus]
20862	1677	C	T	Locus_15283.0_hypothetical_protein_LOTGIDRAFT_221356_[Lottia_gigantea]
20862	1885	A	T	Locus_15283.0_hypothetical_protein_LOTGIDRAFT_221356_[Lottia_gigantea]
20862	2987	C	T	Locus_15283.0_hypothetical_protein_LOTGIDRAFT_221356_[Lottia_gigantea]
20862	3130	A	T	Locus_15283.0_hypothetical_protein_LOTGIDRAFT_221356_[Lottia_gigantea]
20864	320	T	C	Locus_15310.0_hypothetical_protein_LOTGIDRAFT_237287_[Lottia_gigantea]
20864	344	T	C	Locus_15310.0_hypothetical_protein_LOTGIDRAFT_237287_[Lottia_gigantea]
20864	374	G	T	Locus_15310.0_hypothetical_protein_LOTGIDRAFT_237287_[Lottia_gigantea]
20864	472	C	T	Locus_15310.0_hypothetical_protein_LOTGIDRAFT_237287_[Lottia_gigantea]
20864	479	G	A	Locus_15310.0_hypothetical_protein_LOTGIDRAFT_237287_[Lottia_gigantea]
20880	780	T	A	Locus_15540.0_single_IB_domain_protein_[Litopenaeus_vannamei]
20896	556	C	T	Locus_15689.0_Pro-Pol-dUTPase_polyprotein_[Mus_musculus]
20897	1791	A	G	Locus_15707.0_PREDICTED_pallidin-like_[Takifugu_rubripes]
20912	553	A	G	Locus_15807.0_PREDICTED_ribosome-binding_protein_1-like_isoform_X7_[Apis_dorsata]
20912	578	G	C	Locus_15807.0_PREDICTED_ribosome-binding_protein_1-like_isoform_X7_[Apis_dorsata]
20912	630	A	T	Locus_15807.0_PREDICTED_ribosome-binding_protein_1-like_isoform_X7_[Apis_dorsata]
20926	1315	T	C	Locus_15997.1_ORF91_[Caligus_rogercresseyi]
2232	649	T	G	Locus_14300.0|BlastHit|gi|82176473|sp|Q7ZWY2.1|PIHD1_XENLA
2304	1652	T	G	Locus_14631.0|BlastHit|gi|18202731|sp|Q9BQ67.1|GRWD1_HUMAN
2379	517	C	T	Locus_14937.0|BlastHit|gi|74949008|sp|Q9W3T5.1|U640_DROME
2388	212	C	T	Locus_14955.0|BlastHit|gi|5921936|sp|P81576.1|CUPA2_CANPG
2389	380	T	C	Locus_14958.0|BlastHit|gi|353526326|sp|P40791.3|MEF2_DROME
2389	421	A	G	Locus_14958.0|BlastHit|gi|353526326|sp|P40791.3|MEF2_DROME
2405	1542	G	A	Locus_14987.0|BlastHit|gi|124106304|sp|P05166.3|PCCB_HUMAN
2405	1827	A	G	Locus_14987.0|BlastHit|gi|124106304|sp|P05166.3|PCCB_HUMAN
2405	905	C	T	Locus_14987.0|BlastHit|gi|124106304|sp|P05166.3|PCCB_HUMAN
2417	203	A	G	Locus_15024.0|BlastHit|gi|109892841|sp|Q9CXS4.2|CENPV_MOUSE
2421	420	C	T	Locus_15033.0|BlastHit|gi|82082505|sp|Q5ZLC1.1|RM50_CHICK
2421	438	T	C	Locus_15033.0|BlastHit|gi|82082505|sp|Q5ZLC1.1|RM50_CHICK
2422	108	A	C	Locus_15035.0|BlastHit|gi|6016407|sp|O77049.1|JTB_BRUMA
2422	372	C	T	Locus_15035.0|BlastHit|gi|6016407|sp|O77049.1|JTB_BRUMA
2478	1124	G	A	Locus_15231.0|BlastHit|gi|108860942|sp|Q3SZ12.1|RLP24_BOVIN
2478	1139	A	C	Locus_15231.0|BlastHit|gi|108860942|sp|Q3SZ12.1|RLP24_BOVIN
2482	1328	C	T	Locus_15239.0|BlastHit|gi|74710502|sp|Q6YP21.1|KAT3_HUMAN
2496	1273	A	T	Locus_15262.0|BlastHit|gi|50400799|sp|Q9VZ23.1|RAN_DROME
2498	537	C	T	Locus_15268.0|BlastHit|gi|115502331|sp|Q0MQJ4.1|NDUBB_GORGO
2503	106	C	T	Locus_15278.0|BlastHit|gi|20138077|sp|Q9VLM5.1|DAD1_DROME
2503	527	T	A	Locus_15278.0|BlastHit|gi|20138077|sp|Q9VLM5.1|DAD1_DROME
2508	304	C	T	Locus_15291.0|BlastHit|gi|17366497|sp|Q24537.1|HMG2_DROME
2513	1824	T	A	Locus_15303.0|BlastHit|gi|75055245|sp|Q5REU4.1|SND1_PONAB
2516	1407	T	G	Locus_15311.0|BlastHit|gi|1703324|sp|P54864.1|JUN_SERCA
2538	395	G	C	Locus_15367.0|BlastHit|gi|74762123|sp|O95238.1|SPDEF_HUMAN
2552	281	C	T	Locus_15387.0|BlastHit|gi|1709407|sp|P23934.2|NDUS6_BOVIN
2555	294	C	A	Locus_15393.0|BlastHit|gi|52783446|sp|Q6XHI1.1|THIO2_DROYA
2560	6546	A	G	Locus_15407.0|BlastHit|gi|66773801|sp|Q68FD5.3|CLH_MOUSE
2561	197	G	T	Locus_15409.0|BlastHit|gi|82245450|sp|Q90XG0.1|TPISB_DANRE
2569	268	G	A	Locus_15433.0|BlastHit|gi|2500371|sp|Q24154.1|RL29_DROME
2569	75	G	T	Locus_15433.0|BlastHit|gi|2500371|sp|Q24154.1|RL29_DROME
2571	491	G	A	Locus_15436.0|BlastHit|gi|81175197|sp|P18489.3|SYB_DROME
2610	1712	C	T	Locus_15550.0|BlastHit|gi|17370257|sp|P15364.2|AMAL_DROME
2611	1119	C	T	Locus_15552.0|BlastHit|gi|134516|sp|P17863.1|SKI_AVIES
2619	1106	T	C	Locus_15581.0|BlastHit|gi|12643306|sp|Q9UG63.2|ABCF2_HUMAN
2625	2678	A	G	Locus_15598.1|BlastHit|gi|257050981|sp|O75962.2|TRIO_HUMAN
2644	205	C	G	Locus_15627.0|BlastHit|gi|1172773|sp|P42669.1|PURA_MOUSE
2655	742	C	A	Locus_15696.0|BlastHit|gi|55977170|sp|P62311.2|LSM3_MOUSE
2657	1767	G	A	Locus_15717.0|BlastHit|gi|296434394|sp|Q96Q42.2|ALS2_HUMAN
2657	2039	A	G	Locus_15717.0|BlastHit|gi|296434394|sp|Q96Q42.2|ALS2_HUMAN
2751	1115	G	A	Locus_16076.0|BlastHit|gi|44888286|sp|Q96FW1.2|OTUB1_HUMAN
2801	854	T	C	Locus_16256.0|BlastHit|gi|33302635|sp|Q9VMW9.2|GMDS_DROME
2813	1300	G	A	Locus_16298.0|BlastHit|gi|55584091|sp|P49415.2|SDC_DROME
2825	720	A	T	Locus_16329.0|BlastHit|gi|119370654|sp|Q28C98.1|MESH1_XENTR
2849	196	C	A	Locus_16409.0|BlastHit|gi|166919120|sp|A8F5Z3.1|Y1011_THELT
2860	846	A	T	Locus_16454.0|BlastHit|gi|52782788|sp|Q91WN1.2|DNJC9_MOUSE
2892	584	A	G	Locus_16571.0|BlastHit|gi|1703454|sp|P07584.2|ASTA_ASTFL
2892	590	G	C	Locus_16571.0|BlastHit|gi|1703454|sp|P07584.2|ASTA_ASTFL
2899	473	A	G	Locus_16590.0|BlastHit|gi|81903022|sp|Q99JH1.1|RP25L_MOUSE
2903	302	A	G	Locus_16614.0|BlastHit|gi|17368331|sp|P82968.1|MCPI_MELCP
2941	866	A	G	Locus_16764.0|BlastHit|gi|296434488|sp|Q66K89.2|E4F1_HUMAN
2948	829	T	C	Locus_16772.0|BlastHit|gi|122135200|sp|Q27HK4.1|MTX1_PIG
2953	1068	G	C	Locus_16792.0|BlastHit|gi|3024226|sp|Q92685.1|ALG3_HUMAN
2953	1291	A	T	Locus_16792.0|BlastHit|gi|3024226|sp|Q92685.1|ALG3_HUMAN
2958	582	T	C	Locus_16820.0|BlastHit|gi|46577638|sp|P61026.1|RAB10_HUMAN
2970	945	T	C	Locus_16845.0|BlastHit|gi|122001|sp|P21896.2|H2A_CHITH
2992	258	T	A	Locus_16904.0|BlastHit|gi|221271947|sp|A2VDV9.1|CF162_BOVIN
3016	973	G	A	Locus_16973.0|BlastHit|gi|50401773|sp|Q91VY9.1|ZN622_MOUSE
3061	296	T	C	Locus_17101.0|BlastHit|gi|14285771|sp|O96347.1|SODM_CHAFE
3061	348	C	T	Locus_17101.0|BlastHit|gi|14285771|sp|O96347.1|SODM_CHAFE
3064	341	T	C	Locus_17113.0|BlastHit|gi|20140818|sp|Q9IA78.1|T2AG_PAROL
3069	636	G	A	Locus_17121.0|BlastHit|gi|143955284|sp|A2BD66.1|BRK1B_XENLA
3069	708	T	C	Locus_17121.0|BlastHit|gi|143955284|sp|A2BD66.1|BRK1B_XENLA
3079	1299	T	G	Locus_17134.0|BlastHit|gi|82243463|sp|Q8JG64.1|PDIA3_CHICK
3079	1578	T	C	Locus_17134.0|BlastHit|gi|82243463|sp|Q8JG64.1|PDIA3_CHICK
3087	59	C	T	Locus_17150.0|BlastHit|gi|172048427|sp|A9UMU8.1|CG059_XENTR
3087	65	A	G	Locus_17150.0|BlastHit|gi|172048427|sp|A9UMU8.1|CG059_XENTR
3097	446	A	G	Locus_17170.0|BlastHit|gi|5921935|sp|P81575.1|CUPA1_CANPG
3111	171	G	A	Locus_17189.0|BlastHit|gi|51316652|sp|Q6PBI5.1|RS25_DANRE
3111	177	G	A	Locus_17189.0|BlastHit|gi|51316652|sp|Q6PBI5.1|RS25_DANRE
3114	418	G	A	Locus_17195.1|BlastHit|gi|1352167|sp|P12075.2|COX5B_RAT
3114	604	G	A	Locus_17195.1|BlastHit|gi|1352167|sp|P12075.2|COX5B_RAT
3114	633	G	A	Locus_17195.1|BlastHit|gi|1352167|sp|P12075.2|COX5B_RAT
3132	105	T	G	Locus_17224.0|BlastHit|gi|3023703|sp|P56252.1|ENO_HOMGA
3132	563	C	T	Locus_17224.0|BlastHit|gi|3023703|sp|P56252.1|ENO_HOMGA
3133	123	A	C	Locus_17225.0|BlastHit|gi|123582|sp|P22978.1|HS6B_DROME
3133	134	C	G	Locus_17225.0|BlastHit|gi|123582|sp|P22978.1|HS6B_DROME
3139	233	C	T	Locus_17232.0|BlastHit|gi|51704291|sp|P46222.2|RL11_DROME
3147	25	T	C	Locus_17245.0|BlastHit|gi|110825729|sp|P05661.4|MYSA_DROME
3147	274	T	C	Locus_17245.0|BlastHit|gi|110825729|sp|P05661.4|MYSA_DROME
3147	378	A	G	Locus_17245.0|BlastHit|gi|110825729|sp|P05661.4|MYSA_DROME
3147	381	G	C	Locus_17245.0|BlastHit|gi|110825729|sp|P05661.4|MYSA_DROME
3147	385	G	A	Locus_17245.0|BlastHit|gi|110825729|sp|P05661.4|MYSA_DROME
3147	493	G	A	Locus_17245.0|BlastHit|gi|110825729|sp|P05661.4|MYSA_DROME
3147	517	T	C	Locus_17245.0|BlastHit|gi|110825729|sp|P05661.4|MYSA_DROME
3148	211	G	A	Locus_17247.0|BlastHit|gi|12229928|sp|Q9PTW9.1|PSA7_CARAU
3148	235	C	G	Locus_17247.0|BlastHit|gi|12229928|sp|Q9PTW9.1|PSA7_CARAU
3148	367	A	C	Locus_17247.0|BlastHit|gi|12229928|sp|Q9PTW9.1|PSA7_CARAU
3148	595	G	A	Locus_17247.0|BlastHit|gi|12229928|sp|Q9PTW9.1|PSA7_CARAU
3151	318	C	T	Locus_17256.0|BlastHit|gi|73920250|sp|P61759.2|PFD3_MOUSE
3153	103	C	A	Locus_17258.0|BlastHit|gi|12644468|sp|Q94514.2|COX5A_DROME
3153	159	G	A	Locus_17258.0|BlastHit|gi|12644468|sp|Q94514.2|COX5A_DROME
3158	879	G	A	Locus_17275.0|BlastHit|gi|224487926|sp|B4NJR8.1|EI3F1_DROWI
3162	182	T	A	Locus_17292.0|BlastHit|gi|215274192|sp|Q14590.3|ZN235_HUMAN
3166	1018	C	T	Locus_17320.0|BlastHit|gi|122145286|sp|Q0IIF2.1|EI2BA_BOVIN
3167	118	A	G	Locus_17331.0|BlastHit|gi|231502|sp|P30170.1|ACT10_SOLTU
3167	28	G	A	Locus_17331.0|BlastHit|gi|231502|sp|P30170.1|ACT10_SOLTU
3183	74	T	C	Locus_17386.0|BlastHit|gi|20139649|sp|Q99N92.1|RM27_MOUSE
3204	466	T	C	Locus_17406.0|BlastHit|gi|29427664|sp|P91918.1|RSMB_CAEEL
3204	490	C	A	Locus_17406.0|BlastHit|gi|29427664|sp|P91918.1|RSMB_CAEEL
3204	643	C	T	Locus_17406.0|BlastHit|gi|29427664|sp|P91918.1|RSMB_CAEEL
3207	1623	A	T	Locus_17409.0|BlastHit|gi|2498913|sp|Q24524.1|SING_DROME
3208	436	G	T	Locus_17411.0|BlastHit|gi|109894874|sp|Q3T134.1|SPCS1_BOVIN
3212	1727	T	C	Locus_17418.0|BlastHit|gi|134889|sp|Q00004.1|SRP68_CANFA
3218	3275	A	T	Locus_17431.0|BlastHit|gi|57013091|sp|Q924S7.1|SPRE2_MOUSE
3218	3414	C	T	Locus_17431.0|BlastHit|gi|57013091|sp|Q924S7.1|SPRE2_MOUSE
3231	451	T	C	Locus_17468.0|BlastHit|gi|123905239|sp|Q05AU4.1|MMG1B_XENLA
3262	2139	T	A	Locus_17537.0|BlastHit|gi|85681873|sp|O54692.3|ZW10_MOUSE
3284	481	C	T	Locus_17620.0|BlastHit|gi|82182058|sp|Q6AZT4.1|BRM1L_XENLA
3299	215	C	T	Locus_17643.0|BlastHit|gi|22001886|sp|Q963B6.1|RL10A_SPOFR
3310	24	G	A	Locus_17663.0|BlastHit|gi|728796|sp|P41339.1|ACTA_LIMPO
3310	27	A	T	Locus_17663.0|BlastHit|gi|728796|sp|P41339.1|ACTA_LIMPO
3310	288	G	C	Locus_17663.0|BlastHit|gi|728796|sp|P41339.1|ACTA_LIMPO
3386	2008	A	G	Locus_17919.0|BlastHit|gi|3913714|sp|P91950.1|GNAQ_HOMAM
3400	602	T	C	Locus_17984.1|BlastHit|gi|3287776|sp|P81388.1|CU04_HOMAM
3413	199	A	G	Locus_18026.0|BlastHit|gi|82179806|sp|Q5RJX8.1|SU41B_XENLA
3418	456	G	T	Locus_18038.0|BlastHit|gi|12643277|sp|P40304.2|PSB1_DROME
3425	270	C	T	Locus_18046.0|BlastHit|gi|55976403|sp|Q6GLM9.1|CSN5_XENLA
3425	332	C	T	Locus_18046.0|BlastHit|gi|55976403|sp|Q6GLM9.1|CSN5_XENLA
3442	345	A	G	Locus_18077.0|BlastHit|gi|14285503|sp|Q61249.1|IGBP1_MOUSE
3452	1186	C	T	Locus_18091.0|BlastHit|gi|3915686|sp|P08836.2|FPPS_CHICK
3464	174	T	A	Locus_18105.0|BlastHit|gi|2495346|sp|Q91233.1|HSP70_ONCTS
3464	270	C	T,G	Locus_18105.0|BlastHit|gi|2495346|sp|Q91233.1|HSP70_ONCTS
3473	249	A	G	Locus_18124.0|BlastHit|gi|134315|sp|P02635.1|SCPB_PENSP
3473	734	G	A	Locus_18124.0|BlastHit|gi|134315|sp|P02635.1|SCPB_PENSP
3473	735	A	T	Locus_18124.0|BlastHit|gi|134315|sp|P02635.1|SCPB_PENSP
3473	767	C	T	Locus_18124.0|BlastHit|gi|134315|sp|P02635.1|SCPB_PENSP
3476	1807	T	A	Locus_18131.0|BlastHit|gi|15214070|sp|P91891.2|MO25_DROME
3484	62	C	G	Locus_18156.0|BlastHit|gi|51701837|sp|Q962T1.1|RL32_SPOFR
3488	37	C	T	Locus_18170.0|BlastHit|gi|14286117|sp|Q24251.2|ATP5H_DROME
3488	395	G	A	Locus_18170.0|BlastHit|gi|14286117|sp|Q24251.2|ATP5H_DROME
3488	692	G	A	Locus_18170.0|BlastHit|gi|14286117|sp|Q24251.2|ATP5H_DROME
3495	636	G	A	Locus_18189.0|BlastHit|gi|3287775|sp|P81387.1|CU03_HOMAM
3497	289	T	C	Locus_18191.0|BlastHit|gi|12644316|sp|P54385.2|DHE3_DROME
3503	1193	A	G	Locus_18209.0|BlastHit|gi|122119463|sp|Q1HPS0.1|MLR_BOMMO
3503	926	C	A	Locus_18209.0|BlastHit|gi|122119463|sp|Q1HPS0.1|MLR_BOMMO
3505	333	C	G	Locus_18214.0|BlastHit|gi|41712398|sp|P40798.2|STC_DROME
3509	287	A	G	Locus_18223.0|BlastHit|gi|74746535|sp|Q5TGZ0.1|MOS1_HUMAN
3509	545	C	T	Locus_18223.0|BlastHit|gi|74746535|sp|Q5TGZ0.1|MOS1_HUMAN
3509	563	A	G	Locus_18223.0|BlastHit|gi|74746535|sp|Q5TGZ0.1|MOS1_HUMAN
3510	284	G	A	Locus_18224.0|BlastHit|gi|6094097|sp|O01802.1|RL7_CAEEL
3510	452	G	A	Locus_18224.0|BlastHit|gi|6094097|sp|O01802.1|RL7_CAEEL
3510	581	A	T	Locus_18224.0|BlastHit|gi|6094097|sp|O01802.1|RL7_CAEEL
3524	789	G	A	Locus_18268.0|BlastHit|gi|83302472|sp|P56571.2|ES1_RAT
3529	1237	G	A	Locus_18275.0|BlastHit|gi|122137121|sp|Q2TFN9.1|HSP74_CANFA
3529	1687	G	A	Locus_18275.0|BlastHit|gi|122137121|sp|Q2TFN9.1|HSP74_CANFA
3529	694	C	G	Locus_18275.0|BlastHit|gi|122137121|sp|Q2TFN9.1|HSP74_CANFA
3541	838	G	C	Locus_18288.0|BlastHit|gi|75067975|sp|Q9N1Q4.1|LAT2_RABIT
3561	1186	T	A	Locus_18315.0|BlastHit|gi|82241885|sp|Q803V5.1|LST8_DANRE
3567	1312	C	T	Locus_18330.0|BlastHit|gi|82182278|sp|Q6DCP6.1|DYM_XENLA
3569	1487	A	G	Locus_18332.0|BlastHit|gi|12643887|sp|Q9UHV9.1|PFD2_HUMAN
3569	1570	C	A	Locus_18332.0|BlastHit|gi|12643887|sp|Q9UHV9.1|PFD2_HUMAN
[truncated: 1,126 more rows]

## Sheet: ALL SNP LOW
#Unigene	POS	REF	ALT	Loco_id
509	272	C	A	Locus_4527.0|BlastHit|gi|54036181|sp|Q6DRH5.1|NOP10_DANRE
509	273	C	T	Locus_4527.0|BlastHit|gi|54036181|sp|Q6DRH5.1|NOP10_DANRE
529	2954	G	A	Locus_4573.0|BlastHit|gi|62511208|sp|Q80W04.1|TMCC2_MOUSE
531	729	T	C	Locus_4576.0|BlastHit|gi|136424|sp|P00765.1|TRYP_ASTFL
547	764	C	T	Locus_4618.0|BlastHit|gi|92090585|sp|Q27238.2|ADT1_ANOGA
549	1239	A	G	Locus_4621.0|BlastHit|gi|68846974|sp|Q24319.2|OST48_DROME
553	525	A	C	Locus_4632.0|BlastHit|gi|131797|sp|P18067.1|RAB7A_CANFA
555	664	A	G	Locus_4634.0|BlastHit|gi|6685213|sp|Q94519.1|ACPM_DROME
557	264	A	G	Locus_4639.0|BlastHit|gi|81868653|sp|Q9JJW3.1|USMG5_RAT
559	281	C	T	Locus_4644.0|BlastHit|gi|18202261|sp|O96647.1|RL10_BOMMA
588	90	T	G	Locus_4746.0|BlastHit|gi|110825729|sp|P05661.4|MYSA_DROME
594	253	C	A	Locus_4783.0|BlastHit|gi|2492667|sp|Q24733.1|ACT_DICVI
594	257	C	G	Locus_4783.0|BlastHit|gi|2492667|sp|Q24733.1|ACT_DICVI
594	277	C	T	Locus_4783.0|BlastHit|gi|2492667|sp|Q24733.1|ACT_DICVI
594	279	A	C	Locus_4783.0|BlastHit|gi|2492667|sp|Q24733.1|ACT_DICVI
594	288	G	T	Locus_4783.0|BlastHit|gi|2492667|sp|Q24733.1|ACT_DICVI
600	65	T	G	Locus_4814.0|BlastHit|gi|122145078|sp|Q3SZM6.1|COXAM_BOVIN
614	401	C	G	Locus_4892.0|BlastHit|gi|54036077|sp|Q9CY57.2|FOP_MOUSE
614	863	C	T	Locus_4892.0|BlastHit|gi|54036077|sp|Q9CY57.2|FOP_MOUSE
877	173	G	A	Locus_6662.0|BlastHit|gi|1174546|sp|P46097.1|SYT2_MOUSE
997	792	T	C	Locus_7452.0|BlastHit|gi|82268435|sp|Q4SSF5.1|LTOR3_TETNG
1038	540	T	A	Locus_7672.0|BlastHit|gi|22001928|sp|Q9V9Z1.1|RM32_DROME
1052	616	A	G	Locus_7768.0|BlastHit|gi|14286156|sp|P50882.2|RL9_DROME
1054	766	A	G	Locus_7775.0|BlastHit|gi|1350976|sp|P49154.1|RS2_URECA
1066	226	G	C	Locus_7812.0|BlastHit|gi|400515|sp|Q02370.2|NDUA2_BOVIN
1080	840	G	A	Locus_7874.0|BlastHit|gi|29839346|sp|Q8HYW0.1|FA13A_BOVIN
1169	78	C	T	Locus_8262.0|BlastHit|gi|172045599|sp|A8CAG3.1|RL17_PHLPP
1208	1883	C	T	Locus_8445.0|BlastHit|gi|6094347|sp|O76094.3|SRP72_HUMAN
1208	2111	A	G	Locus_8445.0|BlastHit|gi|6094347|sp|O76094.3|SRP72_HUMAN
1208	941	T	C	Locus_8445.0|BlastHit|gi|6094347|sp|O76094.3|SRP72_HUMAN
1274	777	A	G	Locus_8894.0|BlastHit|gi|47606210|sp|Q9DCG9.1|TR112_MOUSE
1358	59	A	G	Locus_9515.0|BlastHit|gi|74866945|sp|Q9U4H5.1|AMX_DROME
1502	1195	C	T	Locus_10587.0|BlastHit|gi|48428025|sp|Q7YQM0.1|GDIA_PONPY
1602	513	G	A	Locus_11212.0|BlastHit|gi|1703189|sp|P00258.2|ADX_PIG
1606	555	A	G	Locus_11229.0|BlastHit|gi|81883983|sp|Q62834.1|CD123_RAT
1609	313	C	T	Locus_11242.0|BlastHit|gi|182676483|sp|A4FV72.1|PPIE_BOVIN
1609	780	C	T	Locus_11242.0|BlastHit|gi|182676483|sp|A4FV72.1|PPIE_BOVIN
1611	724	T	C	Locus_11246.0|BlastHit|gi|82186659|sp|Q6P8E9.1|NH2L1_XENTR
1635	1658	G	A	Locus_11343.0|BlastHit|gi|317373564|sp|Q8NHP7.4|EXD1_HUMAN
1648	995	T	G	Locus_11387.0|BlastHit|gi|1729817|sp|P41900.2|T2FB_DROME
1651	307	G	A	Locus_11393.0|BlastHit|gi|730626|sp|P41115.1|RS11_XENLA
1652	51	C	A	Locus_11394.0|BlastHit|gi|3915912|sp|P07552.2|QCR10_BOVIN
1659	889	T	C	Locus_11411.0|BlastHit|gi|34222632|sp|Q9H936.1|GHC1_HUMAN
1679	1419	A	C	Locus_11471.0|BlastHit|gi|75060961|sp|Q5EA68.3|S61A1_BOVIN
1684	266	T	A	Locus_11477.0|BlastHit|gi|401332|sp|P31402.1|VATE_MANSE
1695	369	G	A	Locus_11501.0|BlastHit|gi|380877064|sp|D4ACN8.1|PLRKT_RAT
1698	1124	T	C	Locus_11507.0|BlastHit|gi|81896794|sp|Q8BN59.1|LARP6_MOUSE
1701	1127	C	T	Locus_11517.0|BlastHit|gi|73622120|sp|Q9NHD5.1|SAN_DROME
1701	301	C	T	Locus_11517.0|BlastHit|gi|73622120|sp|Q9NHD5.1|SAN_DROME
1709	548	C	T	Locus_11545.0|BlastHit|gi|182627521|sp|A7S1H9.1|ACN9_NEMVE
1711	758	G	A	Locus_11547.0|BlastHit|gi|257096598|sp|Q6P298.2|NUBP1_DANRE
1727	637	T	C	Locus_11592.0|BlastHit|gi|74872851|sp|Q9W5R8.2|RL5_DROME
1728	369	G	T	Locus_11594.0|BlastHit|gi|34925050|sp|O95478.1|NSA2_HUMAN
1805	569	C	G	Locus_11819.0|BlastHit|gi|116248576|sp|Q32PA4.1|PHP14_BOVIN
1806	403	T	C	Locus_11825.0|BlastHit|gi|172044638|sp|Q3TIU4.2|PDE12_MOUSE
1806	404	C	A	Locus_11825.0|BlastHit|gi|172044638|sp|Q3TIU4.2|PDE12_MOUSE
1816	190	G	A	Locus_11852.0|BlastHit|gi|126599|sp|P17897.1|LYZ1_MOUSE
1826	34	A	C	Locus_11876.0|BlastHit|gi|48427979|sp|P82119.1|CUO6_BLACR
1826	807	G	A	Locus_11876.0|BlastHit|gi|48427979|sp|P82119.1|CUO6_BLACR
1880	114	T	A	Locus_12008.0|BlastHit|gi|226693529|sp|P32865.2|GPRK1_DROME
2113	1058	A	G	Locus_13460.0|BlastHit|gi|118568025|sp|Q3UMM4.1|CDK10_MOUSE
2232	532	A	G	Locus_14300.0|BlastHit|gi|82176473|sp|Q7ZWY2.1|PIHD1_XENLA
2359	681	G	T	Locus_14858.0|BlastHit|gi|11387209|sp|Q9VEX9.1|SAP18_DROME
2379	73	A	G	Locus_14937.0|BlastHit|gi|74949008|sp|Q9W3T5.1|U640_DROME
2388	299	A	G	Locus_14955.0|BlastHit|gi|5921936|sp|P81576.1|CUPA2_CANPG
2388	473	C	T	Locus_14955.0|BlastHit|gi|5921936|sp|P81576.1|CUPA2_CANPG
2389	412	G	A	Locus_14958.0|BlastHit|gi|353526326|sp|P40791.3|MEF2_DROME
2395	70	T	C	Locus_14966.0|BlastHit|gi|74871274|sp|Q9VW12.1|U389_DROME
2469	1049	G	C	Locus_15194.0|BlastHit|gi|73621844|sp|Q9DBE9.1|RRMJ3_MOUSE
2469	164	A	G	Locus_15194.0|BlastHit|gi|73621844|sp|Q9DBE9.1|RRMJ3_MOUSE
2478	680	A	T	Locus_15231.0|BlastHit|gi|108860942|sp|Q3SZ12.1|RLP24_BOVIN
2482	101	T	C	Locus_15239.0|BlastHit|gi|74710502|sp|Q6YP21.1|KAT3_HUMAN
2482	1153	T	C	Locus_15239.0|BlastHit|gi|74710502|sp|Q6YP21.1|KAT3_HUMAN
2482	242	A	C	Locus_15239.0|BlastHit|gi|74710502|sp|Q6YP21.1|KAT3_HUMAN
2482	752	A	G	Locus_15239.0|BlastHit|gi|74710502|sp|Q6YP21.1|KAT3_HUMAN
2489	1308	A	G	Locus_15253.0|BlastHit|gi|190352213|sp|Q8IZQ5.2|SELH_HUMAN
2496	1313	C	T	Locus_15262.0|BlastHit|gi|50400799|sp|Q9VZ23.1|RAN_DROME
2509	781	C	T	Locus_15292.1|BlastHit|gi|75040217|sp|Q5E996.1|NOP16_BOVIN
2513	3383	A	G	Locus_15303.0|BlastHit|gi|75055245|sp|Q5REU4.1|SND1_PONAB
2515	235	T	C	Locus_15308.0|BlastHit|gi|1706258|sp|P54985.1|PPIA_BLAGE
2522	667	C	T	Locus_15315.0|BlastHit|gi|12229854|sp|O97725.1|NDUAC_BOVIN
2523	342	G	A	Locus_15317.0|BlastHit|gi|226693516|sp|P80977.2|CX6C1_THUOB
2536	404	C	G	Locus_15360.0|BlastHit|gi|29336625|sp|Q24799.1|MYPH_ECHGR
2538	563	G	A	Locus_15367.0|BlastHit|gi|74762123|sp|O95238.1|SPDEF_HUMAN
2545	150	T	C	Locus_15385.0|BlastHit|gi|119164|sp|P12261.3|EF1G_ARTSA
2558	1526	C	T	Locus_15401.0|BlastHit|gi|729335|sp|P21914.2|DHSB_DROME
2561	296	C	T	Locus_15409.0|BlastHit|gi|82245450|sp|Q90XG0.1|TPISB_DANRE
2563	374	C	T	Locus_15421.0|BlastHit|gi|5921903|sp|O13085.1|COX6A_ONCMY
2577	175	T	C	Locus_15447.0|BlastHit|gi|74869351|sp|Q9VJ33.1|NEDD8_DROME
2600	430	G	T	Locus_15521.0|BlastHit|gi|14423827|sp|Q9VQ62.1|NPC2_DROME
2600	554	A	G	Locus_15521.0|BlastHit|gi|14423827|sp|Q9VQ62.1|NPC2_DROME
2612	2032	G	A	Locus_15561.0|BlastHit|gi|110278815|sp|Q3SZF2.3|ARF4_BOVIN
2619	662	G	A	Locus_15581.0|BlastHit|gi|12643306|sp|Q9UG63.2|ABCF2_HUMAN
2623	335	C	A	Locus_15587.0|BlastHit|gi|41018133|sp|Q9CR88.1|RT14_MOUSE
2643	735	C	A	Locus_15625.1|BlastHit|gi|121988046|sp|Q28Y69.1|ZC3HF_DROPS
2728	181	G	A	Locus_15969.0|BlastHit|gi|387942486|sp|D3ZAT9.1|FAXC_RAT
2755	330	G	A	Locus_16087.0|BlastHit|gi|296453054|sp|Q8IYX0.2|ZN679_HUMAN
2757	1119	G	A	Locus_16094.0|BlastHit|gi|12585498|sp|Q9U5N1.1|VATC_MANSE
2765	175	G	T	Locus_16129.0|BlastHit|gi|6225489|sp|Q64625.1|GPX6_RAT
2792	264	G	A	Locus_16242.0|BlastHit|gi|160017979|sp|Q5XJA3.2|PRRC1_DANRE
2853	1133	G	A	Locus_16428.0|BlastHit|gi|94730445|sp|P51523.2|ZNF84_HUMAN
2853	480	A	G	Locus_16428.0|BlastHit|gi|94730445|sp|P51523.2|ZNF84_HUMAN
2947	347	T	C	Locus_16769.0|BlastHit|gi|47117842|sp|P29775.3|ETS4_DROME
2947	374	T	C	Locus_16769.0|BlastHit|gi|47117842|sp|P29775.3|ETS4_DROME
2947	485	G	A	Locus_16769.0|BlastHit|gi|47117842|sp|P29775.3|ETS4_DROME
2948	137	C	T	Locus_16772.0|BlastHit|gi|122135200|sp|Q27HK4.1|MTX1_PIG
2976	105	C	G	Locus_16874.0|BlastHit|gi|14917101|sp|O45405.2|EXL1_CAEEL
3025	141	T	C	Locus_16994.0|BlastHit|gi|118573673|sp|Q498T4.1|RM02_RAT
3025	296	C	T	Locus_16994.0|BlastHit|gi|118573673|sp|Q498T4.1|RM02_RAT
3063	1620	A	C	Locus_17112.0|BlastHit|gi|400257|sp|Q02960.3|MIF_CHICK
3063	2027	C	T	Locus_17112.0|BlastHit|gi|400257|sp|Q02960.3|MIF_CHICK
3069	698	G	T	Locus_17121.0|BlastHit|gi|143955284|sp|A2BD66.1|BRK1B_XENLA
3071	1690	C	T	Locus_17126.0|BlastHit|gi|62510804|sp|Q8HXQ9.1|NDUV1_MACFA
3071	407	C	G	Locus_17126.0|BlastHit|gi|62510804|sp|Q8HXQ9.1|NDUV1_MACFA
3071	59	T	C	Locus_17126.0|BlastHit|gi|62510804|sp|Q8HXQ9.1|NDUV1_MACFA
3078	2543	C	T	Locus_17133.0|BlastHit|gi|81889667|sp|Q5U300.1|UBA1_RAT
3079	1137	A	G	Locus_17134.0|BlastHit|gi|82243463|sp|Q8JG64.1|PDIA3_CHICK
3079	645	A	T	Locus_17134.0|BlastHit|gi|82243463|sp|Q8JG64.1|PDIA3_CHICK
3082	1067	G	A	Locus_17140.0|BlastHit|gi|730372|sp|P40301.1|PSA2_DROME
3083	42	G	T	Locus_17143.0|BlastHit|gi|13959554|sp|P82921.2|RT21_HUMAN
3083	52	T	G	Locus_17143.0|BlastHit|gi|13959554|sp|P82921.2|RT21_HUMAN
3087	328	T	C	Locus_17150.0|BlastHit|gi|172048427|sp|A9UMU8.1|CG059_XENTR
3088	570	G	A	Locus_17153.0|BlastHit|gi|119390880|sp|Q2HJ54.3|PIPNA_BOVIN
3096	37	T	C	Locus_17166.0|BlastHit|gi|1168338|sp|P45521.1|ACT_PROCL
3097	233	C	T	Locus_17170.0|BlastHit|gi|5921935|sp|P81575.1|CUPA1_CANPG
3098	158	T	C	Locus_17170.0|BlastHit|gi|5921935|sp|P81575.1|CUPA1_CANPG
3100	515	A	G	Locus_17173.0|BlastHit|gi|121928|sp|P15870.1|H1D_STRPU
3109	727	A	C	Locus_17188.0|BlastHit|gi|132653|sp|P23358.1|RL12_RAT
3110	646	A	C	Locus_17188.0|BlastHit|gi|132653|sp|P23358.1|RL12_RAT
3111	168	G	A	Locus_17189.0|BlastHit|gi|51316652|sp|Q6PBI5.1|RS25_DANRE
3114	27	C	T	Locus_17195.1|BlastHit|gi|1352167|sp|P12075.2|COX5B_RAT
3127	160	C	T	Locus_17210.0|BlastHit|gi|6016083|sp|P56649.1|G3P_PALVE
3133	126	G	A	Locus_17225.0|BlastHit|gi|123582|sp|P22978.1|HS6B_DROME
3133	142	A	G	Locus_17225.0|BlastHit|gi|123582|sp|P22978.1|HS6B_DROME
3145	120	G	A	Locus_17240.0|BlastHit|gi|115502489|sp|Q0MQI0.1|NDUS7_PANTR
3145	207	C	A	Locus_17240.0|BlastHit|gi|115502489|sp|Q0MQI0.1|NDUS7_PANTR
3145	246	G	A	Locus_17240.0|BlastHit|gi|115502489|sp|Q0MQI0.1|NDUS7_PANTR
3145	258	T	A	Locus_17240.0|BlastHit|gi|115502489|sp|Q0MQI0.1|NDUS7_PANTR
3145	63	G	T	Locus_17240.0|BlastHit|gi|115502489|sp|Q0MQI0.1|NDUS7_PANTR
3145	948	T	A	Locus_17240.0|BlastHit|gi|115502489|sp|Q0MQI0.1|NDUS7_PANTR
3146	3953	G	C	Locus_17242.0|BlastHit|gi|48428375|sp|Q80XI3.2|IF4G3_MOUSE
3148	841	G	C	Locus_17247.0|BlastHit|gi|12229928|sp|Q9PTW9.1|PSA7_CARAU
3148	923	A	G	Locus_17247.0|BlastHit|gi|12229928|sp|Q9PTW9.1|PSA7_CARAU
3153	234	T	C	Locus_17258.0|BlastHit|gi|12644468|sp|Q94514.2|COX5A_DROME
3153	397	C	T	Locus_17258.0|BlastHit|gi|12644468|sp|Q94514.2|COX5A_DROME
3154	2864	G	A	Locus_17259.0|BlastHit|gi|1717853|sp|P52478.1|UBC1_CAEEL
3155	504	C	T	Locus_17270.0|BlastHit|gi|34582476|sp|Q9CQC9.1|SAR1B_MOUSE
3156	2010	C	T	Locus_17271.0|BlastHit|gi|54036166|sp|O62742.1|NLTP_RABIT
3156	2659	A	T	Locus_17271.0|BlastHit|gi|54036166|sp|O62742.1|NLTP_RABIT
3156	2762	A	G	Locus_17271.0|BlastHit|gi|54036166|sp|O62742.1|NLTP_RABIT
3162	270	A	G	Locus_17292.0|BlastHit|gi|215274192|sp|Q14590.3|ZN235_HUMAN
3165	344	A	G	Locus_17298.0|BlastHit|gi|229462993|sp|Q9VEG6.3|PERC_DROME
3170	1439	G	T	Locus_17351.0|BlastHit|gi|82187655|sp|Q7SXS2.1|YIPF5_XENLA
3170	1492	A	G	Locus_17351.0|BlastHit|gi|82187655|sp|Q7SXS2.1|YIPF5_XENLA
3170	1498	A	C	Locus_17351.0|BlastHit|gi|82187655|sp|Q7SXS2.1|YIPF5_XENLA
3170	584	C	T	Locus_17351.0|BlastHit|gi|82187655|sp|Q7SXS2.1|YIPF5_XENLA
3173	187	G	C	Locus_17361.0|BlastHit|gi|122138726|sp|Q32L83.1|BRI3_BOVIN
3182	279	T	C	Locus_17383.0|BlastHit|gi|82237524|sp|Q6P5M2.1|WDR61_DANRE
3183	110	C	T	Locus_17386.0|BlastHit|gi|20139649|sp|Q99N92.1|RM27_MOUSE
3199	1656	T	C	Locus_17399.0|BlastHit|gi|82181462|sp|Q66KC4.1|HSDL2_XENTR
3199	1933	G	A	Locus_17399.0|BlastHit|gi|82181462|sp|Q66KC4.1|HSDL2_XENTR
3204	223	A	G	Locus_17406.0|BlastHit|gi|29427664|sp|P91918.1|RSMB_CAEEL
3204	268	G	A	Locus_17406.0|BlastHit|gi|29427664|sp|P91918.1|RSMB_CAEEL
3204	289	A	G	Locus_17406.0|BlastHit|gi|29427664|sp|P91918.1|RSMB_CAEEL
3204	334	A	T	Locus_17406.0|BlastHit|gi|29427664|sp|P91918.1|RSMB_CAEEL
3204	346	T	A	Locus_17406.0|BlastHit|gi|29427664|sp|P91918.1|RSMB_CAEEL
3204	826	C	A	Locus_17406.0|BlastHit|gi|29427664|sp|P91918.1|RSMB_CAEEL
3207	2851	A	G	Locus_17409.0|BlastHit|gi|2498913|sp|Q24524.1|SING_DROME
3215	96	G	A	Locus_17425.0|BlastHit|gi|341940961|sp|O08789.2|MNT_MOUSE
3233	1523	C	A	Locus_17470.0|BlastHit|gi|82181998|sp|Q6AZI2.1|CCD47_XENLA
3253	1333	A	G	Locus_17509.0|BlastHit|gi|13633893|sp|P82650.1|RT22_HUMAN
3282	741	C	T	Locus_17616.0|BlastHit|gi|81883509|sp|Q5U2U7.1|MCES_RAT
3346	778	T	C	Locus_17794.0|BlastHit|gi|2493525|sp|Q98943.2|CASP2_CHICK
3366	457	C	T	Locus_17851.0|BlastHit|gi|172052453|sp|A6QP15.1|HOT_BOVIN
3397	85	T	C	Locus_17973.0|BlastHit|gi|1168338|sp|P45521.1|ACT_PROCL
3400	410	C	T	Locus_17984.1|BlastHit|gi|3287776|sp|P81388.1|CU04_HOMAM
3400	503	C	T	Locus_17984.1|BlastHit|gi|3287776|sp|P81388.1|CU04_HOMAM
3417	215	A	T	Locus_18037.0|BlastHit|gi|1168338|sp|P45521.1|ACT_PROCL
3425	635	A	G	Locus_18046.0|BlastHit|gi|55976403|sp|Q6GLM9.1|CSN5_XENLA
3452	1254	G	A	Locus_18091.0|BlastHit|gi|3915686|sp|P08836.2|FPPS_CHICK
3460	242	A	G	Locus_18102.0|BlastHit|gi|224493238|sp|A6QPQ5.1|RM01_BOVIN
3464	156	C	T	Locus_18105.0|BlastHit|gi|2495346|sp|Q91233.1|HSP70_ONCTS
3464	247	G	A	Locus_18105.0|BlastHit|gi|2495346|sp|Q91233.1|HSP70_ONCTS
3464	309	T	C	Locus_18105.0|BlastHit|gi|2495346|sp|Q91233.1|HSP70_ONCTS
3465	25	C	T	Locus_18108.0|BlastHit|gi|33112324|sp|Q8K0U4.1|HS12A_MOUSE
3466	3004	C	A	Locus_18110.0|BlastHit|gi|82180346|sp|Q5XGU5.1|DNJ6B_XENLA
3466	3006	A	C	Locus_18110.0|BlastHit|gi|82180346|sp|Q5XGU5.1|DNJ6B_XENLA
3468	1190	A	T	Locus_18113.0|BlastHit|gi|238064966|sp|Q0VBY7.2|DJC24_BOVIN
3473	671	T	C	Locus_18124.0|BlastHit|gi|134315|sp|P02635.1|SCPB_PENSP
3482	423	A	G	Locus_18149.0|BlastHit|gi|6831612|sp|Q9XYC2.3|RL15_ORCLI
3482	531	C	T	Locus_18149.0|BlastHit|gi|6831612|sp|Q9XYC2.3|RL15_ORCLI
3482	618	G	A	Locus_18149.0|BlastHit|gi|6831612|sp|Q9XYC2.3|RL15_ORCLI
3482	666	C	T	Locus_18149.0|BlastHit|gi|6831612|sp|Q9XYC2.3|RL15_ORCLI
3495	510	A	G	Locus_18189.0|BlastHit|gi|3287775|sp|P81387.1|CU03_HOMAM
3495	552	G	A	Locus_18189.0|BlastHit|gi|3287775|sp|P81387.1|CU03_HOMAM
3503	737	G	A	Locus_18209.0|BlastHit|gi|122119463|sp|Q1HPS0.1|MLR_BOMMO
3505	203	C	T	Locus_18214.0|BlastHit|gi|41712398|sp|P40798.2|STC_DROME
3507	1069	G	A	Locus_18220.0|BlastHit|gi|82233006|sp|Q5U4Y8.1|SEH1_XENTR
3507	706	G	T	Locus_18220.0|BlastHit|gi|82233006|sp|Q5U4Y8.1|SEH1_XENTR
3510	467	C	T	Locus_18224.0|BlastHit|gi|6094097|sp|O01802.1|RL7_CAEEL
3526	1304	A	G	Locus_18271.0|BlastHit|gi|44888996|sp|P28668.2|SYEP_DROME
3526	1778	A	G	Locus_18271.0|BlastHit|gi|44888996|sp|P28668.2|SYEP_DROME
3526	2066	T	C	Locus_18271.0|BlastHit|gi|44888996|sp|P28668.2|SYEP_DROME
3538	3152	C	G	Locus_18282.0|BlastHit|gi|13124351|sp|Q23978.1|MY31D_DROME
3547	2989	G	A	Locus_18293.0|BlastHit|gi|2493142|sp|Q26250.1|VATL_NEPNO
3548	700	C	T	Locus_18297.0|BlastHit|gi|20532410|sp|P46471.5|PRS7_MOUSE
3548	919	C	T	Locus_18297.0|BlastHit|gi|20532410|sp|P46471.5|PRS7_MOUSE
3548	946	C	T	Locus_18297.0|BlastHit|gi|20532410|sp|P46471.5|PRS7_MOUSE
3568	926	A	G	Locus_18331.0|BlastHit|gi|82180841|sp|Q640F2.1|SHCBB_XENLA
3570	450	C	T	Locus_18335.0|BlastHit|gi|6094438|sp|O77622.3|TCPZ_RABIT
3570	957	C	T	Locus_18335.0|BlastHit|gi|6094438|sp|O77622.3|TCPZ_RABIT
3571	974	G	A	Locus_18339.0|BlastHit|gi|122063579|sp|Q7JX57.1|U466_DROME
3574	765	A	T	Locus_18345.0|BlastHit|gi|172044540|sp|P0C6G6.1|MYP2_HORSE
3612	2088	A	T	Locus_18435.0|BlastHit|gi|74780873|sp|Q5TTG1.1|VATA_ANOGA
3615	753	G	T	Locus_18446.0|BlastHit|gi|85701378|sp|P48612.2|PELO_DROME
3629	668	A	G	Locus_18486.0|BlastHit|gi|82183152|sp|Q6DGZ3.1|THOC7_DANRE
3629	771	T	C	Locus_18486.0|BlastHit|gi|82183152|sp|Q6DGZ3.1|THOC7_DANRE
3632	599	G	A	Locus_18493.0|BlastHit|gi|25091539|sp|Q969T9.1|WBP2_HUMAN
3636	452	G	A	Locus_18500.0|BlastHit|gi|27805425|sp|O35623.1|BET1_MOUSE
3651	169	T	C	Locus_18534.0|BlastHit|gi|129688|sp|P21902.1|PCE_TACTR
3651	332	A	C	Locus_18534.0|BlastHit|gi|129688|sp|P21902.1|PCE_TACTR
3651	552	G	A	Locus_18534.0|BlastHit|gi|129688|sp|P21902.1|PCE_TACTR
3651	68	G	A	Locus_18534.0|BlastHit|gi|129688|sp|P21902.1|PCE_TACTR
3660	2011	C	G	Locus_18556.0|BlastHit|gi|12644106|sp|P08155.2|KRUH_DROME
3675	494	G	T	Locus_18605.0|BlastHit|gi|74868451|sp|Q9VD92.1|ARCH_DROME
3699	818	C	T	Locus_18659.0|BlastHit|gi|20138031|sp|Q9NPF5.1|DMAP1_HUMAN
3706	414	C	A	Locus_18676.0|BlastHit|gi|464524|sp|Q05974.1|RAB1A_LYMST
3706	417	A	G	Locus_18676.0|BlastHit|gi|464524|sp|Q05974.1|RAB1A_LYMST
3708	162	C	T	Locus_18681.0|BlastHit|gi|62900636|sp|Q8BZ09.1|ODC_MOUSE
3708	567	T	C	Locus_18681.0|BlastHit|gi|62900636|sp|Q8BZ09.1|ODC_MOUSE
3712	269	T	A	Locus_18695.0|BlastHit|gi|231502|sp|P30170.1|ACT10_SOLTU
3722	189	T	C	Locus_18720.0|BlastHit|gi|74676478|sp|Q08742.1|RDL2_YEAST
3722	403	G	C	Locus_18720.0|BlastHit|gi|74676478|sp|Q08742.1|RDL2_YEAST
3722	454	G	A	Locus_18720.0|BlastHit|gi|74676478|sp|Q08742.1|RDL2_YEAST
3728	1160	C	T	Locus_18733.0|BlastHit|gi|81883477|sp|Q5U2Q3.1|CK054_RAT
3729	330	A	G	Locus_18739.0|BlastHit|gi|33860139|sp|P41996.3|CPG2_CAEEL
3734	339	C	T	Locus_18761.0|BlastHit|gi|205777157|sp|Q19673.5|TYR3_CAEEL
3737	1538	T	C	Locus_18767.0|BlastHit|gi|112828|sp|P27091.1|60A_DROME
3738	893	A	G	Locus_18770.0|BlastHit|gi|81884505|sp|Q6AY04.1|CB047_RAT
3744	136	T	A	Locus_18779.0|BlastHit|gi|5902701|sp|O60232.1|SSA27_HUMAN
3744	256	C	T	Locus_18779.0|BlastHit|gi|5902701|sp|O60232.1|SSA27_HUMAN
3862	715	C	G	Locus_19105.0|BlastHit|gi|374095459|sp|Q96AJ9.2|VTI1A_HUMAN
3960	208	T	C	Locus_19405.0|BlastHit|gi|23396819|sp|Q9CQR4.1|ACO13_MOUSE
3960	216	G	A	Locus_19405.0|BlastHit|gi|23396819|sp|Q9CQR4.1|ACO13_MOUSE
3990	212	T	C	Locus_19462.0|BlastHit|gi|81174969|sp|Q53FV1.2|ORML2_HUMAN
3990	309	T	C	Locus_19462.0|BlastHit|gi|81174969|sp|Q53FV1.2|ORML2_HUMAN
3991	317	T	A	Locus_19465.0|BlastHit|gi|116242778|sp|Q6NW29.3|RWDD4_HUMAN
3996	282	G	A	Locus_19481.0|BlastHit|gi|74742178|sp|Q5JTJ3.1|CA031_HUMAN
4014	136	G	A	Locus_19525.0|BlastHit|gi|5921937|sp|P81577.1|CUPA3_CANPG
4014	220	T	C	Locus_19525.0|BlastHit|gi|5921937|sp|P81577.1|CUPA3_CANPG
4014	234	C	T	Locus_19525.0|BlastHit|gi|5921937|sp|P81577.1|CUPA3_CANPG
4032	3159	A	C	Locus_19555.0|BlastHit|gi|205371761|sp|P23588.2|IF4B_HUMAN
4037	1007	G	A	Locus_19576.0|BlastHit|gi|130353|sp|P15259.3|PGAM2_HUMAN
4037	1346	A	T	Locus_19576.0|BlastHit|gi|130353|sp|P15259.3|PGAM2_HUMAN
4038	155	T	G	Locus_19582.0|BlastHit|gi|399021|sp|P25304.2|AGRIN_RAT
4078	117	G	A	Locus_19655.0|BlastHit|gi|122106389|sp|Q17BB0.1|WDR12_AEDAE
4078	849	A	G	Locus_19655.0|BlastHit|gi|122106389|sp|Q17BB0.1|WDR12_AEDAE
4130	1024	A	G	Locus_19800.0|BlastHit|gi|82197810|sp|Q5ZKE7.1|KCY_CHICK
4152	240	A	G	Locus_19849.0|BlastHit|gi|122133598|sp|Q17Q97.1|CS060_BOVIN
4161	1113	A	G	Locus_19881.0|BlastHit|gi|82187641|sp|Q7SXP0.1|S22BB_DANRE
4181	371	C	A	Locus_19915.0|BlastHit|gi|75060495|sp|Q58DM4.1|ALKB2_BOVIN
4185	4230	T	G	Locus_19928.0|BlastHit|gi|158931161|sp|O00139.3|KIF2A_HUMAN
4189	456	A	G	Locus_19931.0|BlastHit|gi|114389|sp|P25169.1|AT1B1_ARTSF
4195	129	T	C	Locus_19941.0|BlastHit|gi|116242852|sp|Q8N567.2|ZCHC9_HUMAN
4197	257	A	G	Locus_19944.1|BlastHit|gi|3287772|sp|P81384.1|CU1A_HOMAM
4219	570	C	T	Locus_20011.0|BlastHit|gi|119361072|sp|Q08D64.1|ABCB6_XENTR
4230	378	A	G	Locus_20036.0|BlastHit|gi|82185895|sp|Q6NY89.1|LSG1_DANRE
4246	346	G	T	Locus_20087.0|BlastHit|gi|251764999|sp|A7RLE5.1|RCL_NEMVE
4246	787	C	T	Locus_20087.0|BlastHit|gi|251764999|sp|A7RLE5.1|RCL_NEMVE
4257	2207	T	C	Locus_20123.0|BlastHit|gi|17380352|sp|P13060.4|EF2_DROME
4257	926	G	A	Locus_20123.0|BlastHit|gi|17380352|sp|P13060.4|EF2_DROME
4295	58	C	T	Locus_20221.0|BlastHit|gi|134890|sp|P21262.2|SRP09_CANFA
4301	304	G	T	Locus_20246.0|BlastHit|gi|82209800|sp|Q7ZYC4.1|ACBG2_XENLA
4308	83	A	G	Locus_20251.0|BlastHit|gi|121671|sp|P21765.2|GPX5_MOUSE
4322	1706	A	G	Locus_20289.0|BlastHit|gi|81875183|sp|Q8BTV1.1|TUSC3_MOUSE
4322	363	G	A	Locus_20289.0|BlastHit|gi|81875183|sp|Q8BTV1.1|TUSC3_MOUSE
4348	1089	T	C	Locus_20326.0|BlastHit|gi|33112671|sp|Q99417.3|MYCBP_HUMAN
4348	274	T	C	Locus_20326.0|BlastHit|gi|33112671|sp|Q99417.3|MYCBP_HUMAN
4351	156	T	C	Locus_20335.0|BlastHit|gi|47605568|sp|Q7SYR1.1|OSGEP_XENLA
4351	333	T	C	Locus_20335.0|BlastHit|gi|47605568|sp|Q7SYR1.1|OSGEP_XENLA
4351	690	A	G	Locus_20335.0|BlastHit|gi|47605568|sp|Q7SYR1.1|OSGEP_XENLA
4351	822	A	T	Locus_20335.0|BlastHit|gi|47605568|sp|Q7SYR1.1|OSGEP_XENLA
4354	161	T	A	Locus_20343.0|BlastHit|gi|380876913|sp|E1BWM5.1|FUND1_CHICK
4354	470	G	A	Locus_20343.0|BlastHit|gi|380876913|sp|E1BWM5.1|FUND1_CHICK
4362	289	C	T	Locus_20353.0|BlastHit|gi|74752601|sp|Q9H2A2.1|AL8A1_HUMAN
4362	841	G	A	Locus_20353.0|BlastHit|gi|74752601|sp|Q9H2A2.1|AL8A1_HUMAN
4371	342	T	A	Locus_20371.0|BlastHit|gi|55976431|sp|Q6NUC2.1|CSN6_XENLA
4380	383	T	A	Locus_20388.0|BlastHit|gi|1709616|sp|P54399.1|PDI_DROME
4381	217	G	A	Locus_20389.0|BlastHit|gi|1708394|sp|P54106.1|ICLN_XENLA
4387	3207	C	T	Locus_20405.0|BlastHit|gi|215274166|sp|O95163.3|ELP1_HUMAN
4412	942	C	G	Locus_20456.0|BlastHit|gi|1709543|sp|P24666.3|PPAC_HUMAN
4428	285	G	A	Locus_20507.0|BlastHit|gi|71153689|sp|Q6QMZ4.3|RL6_CHILA
4428	729	A	T	Locus_20507.0|BlastHit|gi|71153689|sp|Q6QMZ4.3|RL6_CHILA
4455	822	T	C	Locus_20557.0|BlastHit|gi|257096650|sp|A7SE07.1|NUBP2_NEMVE
4461	1095	T	C	Locus_20569.0|BlastHit|gi|239977312|sp|B6RLX2.1|IVBIT_OPHHA
4477	163	A	T	Locus_20599.0|BlastHit|gi|170652912|sp|A8Y1P7.1|BRE4_CAEBR
4484	4305	G	A	Locus_20609.0|BlastHit|gi|82238124|sp|Q6TEN1.1|RAP1B_DANRE
4492	206	A	C	Locus_20621.0|BlastHit|gi|1351868|sp|P49055.1|ACTS_CARAU
4499	1516	G	C	Locus_20628.0|BlastHit|gi|75052112|sp|Q56P28.1|PRAF3_PIG
4499	1873	C	A	Locus_20628.0|BlastHit|gi|75052112|sp|Q56P28.1|PRAF3_PIG
4502	1745	T	C	Locus_20638.0|BlastHit|gi|62510603|sp|Q60HG3.1|DLDH_MACFA
4502	247	G	A	Locus_20638.0|BlastHit|gi|62510603|sp|Q60HG3.1|DLDH_MACFA
4546	1166	G	A	Locus_20708.0|BlastHit|gi|75075379|sp|Q4R3J0.1|RTC1_MACFA
4587	261	G	A	Locus_20780.0|BlastHit|gi|74732998|sp|Q9BSF4.2|CS052_HUMAN
4587	540	T	A	Locus_20780.0|BlastHit|gi|74732998|sp|Q9BSF4.2|CS052_HUMAN
4592	1214	G	A	Locus_20791.0|BlastHit|gi|74759034|sp|Q7RTN6.1|STRAA_HUMAN
4592	803	C	T	Locus_20791.0|BlastHit|gi|74759034|sp|Q7RTN6.1|STRAA_HUMAN
4603	629	C	T	Locus_20809.0|BlastHit|gi|74715446|sp|Q8NEZ2.1|VP37A_HUMAN
4603	638	A	G	Locus_20809.0|BlastHit|gi|74715446|sp|Q8NEZ2.1|VP37A_HUMAN
4605	869	G	A	Locus_20824.0|BlastHit|gi|82081893|sp|Q5ZK10.1|NSF1C_CHICK
4615	225	G	A	Locus_20852.0|BlastHit|gi|29428063|sp|Q9VLV5.1|RUXE_DROME
4615	339	G	A	Locus_20852.0|BlastHit|gi|29428063|sp|Q9VLV5.1|RUXE_DROME
4615	71	T	A	Locus_20852.0|BlastHit|gi|29428063|sp|Q9VLV5.1|RUXE_DROME
4617	313	C	T	Locus_20859.0|BlastHit|gi|123913997|sp|Q08CN9.1|ZNRF2_DANRE
4618	563	G	T	Locus_20861.0|BlastHit|gi|12643427|sp|P35134.2|UBC11_ARATH
4619	1106	C	T	Locus_20862.0|BlastHit|gi|52783454|sp|Q8BMS2.2|SPON2_MOUSE
4622	3472	T	A	Locus_20865.0|BlastHit|gi|160370000|sp|O94913.3|PCF11_HUMAN
4655	599	G	A	Locus_20904.0|BlastHit|gi|308153478|sp|Q9CX56.2|PSMD8_MOUSE
4655	713	T	C	Locus_20904.0|BlastHit|gi|308153478|sp|Q9CX56.2|PSMD8_MOUSE
4656	1049	G	C	Locus_20905.0|BlastHit|gi|76800653|sp|Q05319.2|STUB_DROME
4656	308	G	A	Locus_20905.0|BlastHit|gi|76800653|sp|Q05319.2|STUB_DROME
4663	1229	G	C	Locus_20910.0|BlastHit|gi|114034|sp|P05090.1|APOD_HUMAN
4663	562	C	T	Locus_20910.0|BlastHit|gi|114034|sp|P05090.1|APOD_HUMAN
4666	573	C	T	Locus_20913.0|BlastHit|gi|47117891|sp|Q24522.2|BUN1_DROME
4678	861	T	C	Locus_20938.0|BlastHit|gi|136429|sp|P00761.1|TRYP_PIG
4678	864	G	C	Locus_20938.0|BlastHit|gi|136429|sp|P00761.1|TRYP_PIG
4684	1164	A	G	Locus_20951.0|BlastHit|gi|90101415|sp|Q2L969.1|MTX2_PIG
4684	1188	T	C	Locus_20951.0|BlastHit|gi|90101415|sp|Q2L969.1|MTX2_PIG
4684	997	T	C	Locus_20951.0|BlastHit|gi|90101415|sp|Q2L969.1|MTX2_PIG
4688	1017	A	G	Locus_20959.1|BlastHit|gi|296439462|sp|Q99933.4|BAG1_HUMAN
4698	931	C	A	Locus_20976.0|BlastHit|gi|122119463|sp|Q1HPS0.1|MLR_BOMMO
4715	2315	G	A	Locus_20988.0|BlastHit|gi|3024541|sp|O42184.1|CLIP1_CHICK
4715	2316	C	A	Locus_20988.0|BlastHit|gi|3024541|sp|O42184.1|CLIP1_CHICK
4733	466	A	G	Locus_21025.0|BlastHit|gi|1706258|sp|P54985.1|PPIA_BLAGE
4734	1079	A	C	Locus_21027.0|BlastHit|gi|68565296|sp|Q9H3L0.2|MMAD_HUMAN
4734	839	A	G	Locus_21027.0|BlastHit|gi|68565296|sp|Q9H3L0.2|MMAD_HUMAN
4743	1907	A	G	Locus_21034.0|BlastHit|gi|215274240|sp|Q05086.4|UBE3A_HUMAN
4759	436	C	G	Locus_21064.0|BlastHit|gi|18202123|sp|O70378.1|CX4NB_MOUSE
4765	803	A	T	Locus_21076.0|BlastHit|gi|94730675|sp|Q499N3.1|WDR18_RAT
4771	1120	C	T	Locus_21094.0|BlastHit|gi|1705999|sp|P53619.1|COPD_BOVIN
4771	232	G	A	Locus_21094.0|BlastHit|gi|1705999|sp|P53619.1|COPD_BOVIN
4784	148	A	T	Locus_21113.0|BlastHit|gi|13633946|sp|Q9VY28.1|RT25_DROME
4784	166	A	G	Locus_21113.0|BlastHit|gi|13633946|sp|Q9VY28.1|RT25_DROME
4784	262	T	C	Locus_21113.0|BlastHit|gi|13633946|sp|Q9VY28.1|RT25_DROME
4784	561	G	A	Locus_21113.0|BlastHit|gi|13633946|sp|Q9VY28.1|RT25_DROME
4803	1309	G	A	Locus_21142.0|BlastHit|gi|20137671|sp|Q9UBX3.2|DIC_HUMAN
4803	2107	T	C	Locus_21142.0|BlastHit|gi|20137671|sp|Q9UBX3.2|DIC_HUMAN
4804	169	C	T	Locus_21143.0|BlastHit|gi|75070825|sp|Q5RC80.1|RBM39_PONAB
4804	472	C	T	Locus_21143.0|BlastHit|gi|75070825|sp|Q5RC80.1|RBM39_PONAB
4804	544	C	T	Locus_21143.0|BlastHit|gi|75070825|sp|Q5RC80.1|RBM39_PONAB
4845	173	A	G	Locus_21212.0|BlastHit|gi|121928|sp|P15870.1|H1D_STRPU
4845	175	C	G	Locus_21212.0|BlastHit|gi|121928|sp|P15870.1|H1D_STRPU
4854	157	G	C	Locus_21225.0|BlastHit|gi|108935910|sp|Q95108.2|THIOM_BOVIN
4854	736	C	A	Locus_21225.0|BlastHit|gi|108935910|sp|Q95108.2|THIOM_BOVIN
4854	861	C	T	Locus_21225.0|BlastHit|gi|108935910|sp|Q95108.2|THIOM_BOVIN
4856	299	C	G	Locus_21234.0|BlastHit|gi|729072|sp|P80363.1|CCB23_ORCLI
4863	739	T	C	Locus_21247.0|BlastHit|gi|11133618|sp|Q9VHD2.1|MAAI2_DROME
4864	1133	T	C	Locus_21250.0|BlastHit|gi|62510618|sp|Q6PBY3.1|EDF1_DANRE
4869	775	T	C	Locus_21257.0|BlastHit|gi|296439434|sp|Q96KQ4.3|ASPP1_HUMAN
4875	1281	G	A	Locus_21266.0|BlastHit|gi|51317410|sp|P62775.2|MTPN_RAT
4875	1445	G	A	Locus_21266.0|BlastHit|gi|51317410|sp|P62775.2|MTPN_RAT
4914	1367	A	G	Locus_21307.0|BlastHit|gi|82183924|sp|Q6GLV4.1|UBX1B_XENLA
4914	1672	A	T	Locus_21307.0|BlastHit|gi|82183924|sp|Q6GLV4.1|UBX1B_XENLA
4920	864	C	T	Locus_21322.0|BlastHit|gi|14548191|sp|O15162.1|PLS1_HUMAN
4934	63	A	G	Locus_21324.1|BlastHit|gi|302393813|sp|Q9SHE7.3|RUB1_ARATH
4936	398	A	G	Locus_21335.0|BlastHit|gi|50403762|sp|Q01083.2|SPITZ_DROME
4970	1848	A	G	Locus_21418.0|BlastHit|gi|18203660|sp|Q9Z2A0.2|PDPK1_MOUSE
4972	777	A	G	Locus_21421.0|BlastHit|gi|74732856|sp|Q9BRA2.1|TXD17_HUMAN
4997	1171	C	T	Locus_21454.0|BlastHit|gi|122069112|sp|P10076.2|ZFP26_MOUSE
4997	1264	C	T	Locus_21454.0|BlastHit|gi|122069112|sp|P10076.2|ZFP26_MOUSE
4997	1574	C	T	Locus_21454.0|BlastHit|gi|122069112|sp|P10076.2|ZFP26_MOUSE
5009	1036	A	T	Locus_21468.0|BlastHit|gi|82202300|sp|Q6P026.1|BAF_DANRE
5009	1373	G	A	Locus_21468.0|BlastHit|gi|82202300|sp|Q6P026.1|BAF_DANRE
5009	503	T	C	Locus_21468.0|BlastHit|gi|82202300|sp|Q6P026.1|BAF_DANRE
5009	673	G	A	Locus_21468.0|BlastHit|gi|82202300|sp|Q6P026.1|BAF_DANRE
5010	317	A	G	Locus_21469.0|BlastHit|gi|82202470|sp|Q6P877.1|ADRM1_XENTR
5010	977	C	T	Locus_21469.0|BlastHit|gi|82202470|sp|Q6P877.1|ADRM1_XENTR
5011	788	T	C	Locus_21470.0|BlastHit|gi|31076777|sp|Q9VKV5.1|LIN1_DROME
5018	1214	G	A	Locus_21476.0|BlastHit|gi|34921426|sp|O96790.2|DPGN_DIPMA
5018	290	T	A	Locus_21476.0|BlastHit|gi|34921426|sp|O96790.2|DPGN_DIPMA
5018	728	G	A	Locus_21476.0|BlastHit|gi|34921426|sp|O96790.2|DPGN_DIPMA
5021	202	C	A	Locus_21491.0|BlastHit|gi|1168338|sp|P45521.1|ACT_PROCL
5025	1135	G	A	Locus_21499.0|BlastHit|gi|82184175|sp|Q6GN98.1|N6MT2_XENLA
5028	100	C	T	Locus_21507.0|BlastHit|gi|136050|sp|P15159.1|TNNC_TACTR
5028	231	C	G	Locus_21507.0|BlastHit|gi|136050|sp|P15159.1|TNNC_TACTR
5028	234	A	G	Locus_21507.0|BlastHit|gi|136050|sp|P15159.1|TNNC_TACTR
5028	578	C	G	Locus_21507.0|BlastHit|gi|136050|sp|P15159.1|TNNC_TACTR
5028	89	T	C	Locus_21507.0|BlastHit|gi|136050|sp|P15159.1|TNNC_TACTR
5090	2001	A	G	Locus_21593.0|BlastHit|gi|10720060|sp|Q9XYN1.1|INX2_SCHAM
5125	26	C	T	Locus_21624.0|BlastHit|gi|21264423|sp|P21266.3|GSTM3_HUMAN
5125	488	T	C	Locus_21624.0|BlastHit|gi|21264423|sp|P21266.3|GSTM3_HUMAN
5135	1689	G	A	Locus_21632.0|BlastHit|gi|74751725|sp|Q969M7.1|UBE2F_HUMAN
5135	745	C	T	Locus_21632.0|BlastHit|gi|74751725|sp|Q969M7.1|UBE2F_HUMAN
5140	790	T	C	Locus_21650.0|BlastHit|gi|122117908|sp|Q178L7.1|SDHF2_AEDAE
5161	1719	C	G	Locus_21663.0|BlastHit|gi|82087410|sp|Q6PUR6.1|GPN2_DANRE
5161	1721	T	C	Locus_21663.0|BlastHit|gi|82087410|sp|Q6PUR6.1|GPN2_DANRE
5164	230	G	A	Locus_21673.0|BlastHit|gi|62510806|sp|Q8HXW6.1|PPT1_MACFA
5164	266	C	T	Locus_21673.0|BlastHit|gi|62510806|sp|Q8HXW6.1|PPT1_MACFA
5164	569	T	C	Locus_21673.0|BlastHit|gi|62510806|sp|Q8HXW6.1|PPT1_MACFA
5167	1433	G	A	Locus_21681.0|BlastHit|gi|74752124|sp|Q96S94.1|CCNL2_HUMAN
5167	1993	C	T	Locus_21681.0|BlastHit|gi|74752124|sp|Q96S94.1|CCNL2_HUMAN
5172	1901	A	G	Locus_21688.0|BlastHit|gi|11386676|sp|Q9VWR5.1|CP306_DROME
5177	1051	G	T	Locus_21697.0|BlastHit|gi|84029407|sp|Q9NWZ5.2|UCKL1_HUMAN
5177	1303	C	T	Locus_21697.0|BlastHit|gi|84029407|sp|Q9NWZ5.2|UCKL1_HUMAN
5177	1531	T	C	Locus_21697.0|BlastHit|gi|84029407|sp|Q9NWZ5.2|UCKL1_HUMAN
5178	167	G	A	Locus_21702.0|BlastHit|gi|464989|sp|Q05120.1|UBIL_NPVOP
5178	364	A	G	Locus_21702.0|BlastHit|gi|464989|sp|Q05120.1|UBIL_NPVOP
5178	550	C	T	Locus_21702.0|BlastHit|gi|464989|sp|Q05120.1|UBIL_NPVOP
5179	144	T	C	Locus_21706.0|BlastHit|gi|205786023|sp|Q28ID3.2|GLRX3_XENTR
5179	844	C	T	Locus_21706.0|BlastHit|gi|205786023|sp|Q28ID3.2|GLRX3_XENTR
5179	850	C	T	Locus_21706.0|BlastHit|gi|205786023|sp|Q28ID3.2|GLRX3_XENTR
5188	1123	T	C	Locus_21719.0|BlastHit|gi|55976430|sp|Q6NRT5.1|CSN1_XENLA
5200	2182	A	G	Locus_21730.0|BlastHit|gi|143811413|sp|Q58CV6.2|KLDC3_BOVIN
5203	225	T	A	Locus_21740.0|BlastHit|gi|401248|sp|P23004.2|QCR2_BOVIN
5203	977	C	T	Locus_21740.0|BlastHit|gi|401248|sp|P23004.2|QCR2_BOVIN
5251	1068	G	T	Locus_21815.0|BlastHit|gi|74967036|sp|Q24423.1|NOC_DROME
5251	1275	C	T	Locus_21815.0|BlastHit|gi|74967036|sp|Q24423.1|NOC_DROME
5286	4578	C	T	Locus_21849.0|BlastHit|gi|1346652|sp|Q01728.3|NAC1_RAT
5291	1040	G	A	Locus_21859.1|BlastHit|gi|2500907|sp|Q24143.1|HR96_DROME
5291	1057	G	A	Locus_21859.1|BlastHit|gi|2500907|sp|Q24143.1|HR96_DROME
5291	638	C	T	Locus_21859.1|BlastHit|gi|2500907|sp|Q24143.1|HR96_DROME
5374	2230	A	T	Locus_22007.0|BlastHit|gi|81878382|sp|Q8K0V2.1|DCNL3_MOUSE
5379	1356	T	A	Locus_22019.0|BlastHit|gi|75056123|sp|Q9GLE4.1|MMP14_BOVIN
5379	1359	A	T	Locus_22019.0|BlastHit|gi|75056123|sp|Q9GLE4.1|MMP14_BOVIN
5379	645	A	G	Locus_22019.0|BlastHit|gi|75056123|sp|Q9GLE4.1|MMP14_BOVIN
5379	77	C	T	Locus_22019.0|BlastHit|gi|75056123|sp|Q9GLE4.1|MMP14_BOVIN
5379	933	A	G	Locus_22019.0|BlastHit|gi|75056123|sp|Q9GLE4.1|MMP14_BOVIN
5380	540	T	A	Locus_22023.0|BlastHit|gi|81903615|sp|Q9CR41.2|HYPK_MOUSE
5381	1044	T	C	Locus_22026.0|BlastHit|gi|38258901|sp|P13582.3|EAST_DROME
5382	589	C	T	Locus_22035.0|BlastHit|gi|1705630|sp|P00787.2|CATB_RAT
5408	2055	A	T	Locus_22089.0|BlastHit|gi|124231|sp|P10160.2|IF5A1_RABIT
5408	2324	T	C	Locus_22089.0|BlastHit|gi|124231|sp|P10160.2|IF5A1_RABIT
5408	2665	C	T	Locus_22089.0|BlastHit|gi|124231|sp|P10160.2|IF5A1_RABIT
5408	2751	G	A	Locus_22089.0|BlastHit|gi|124231|sp|P10160.2|IF5A1_RABIT
5446	25	T	A	Locus_22165.0|BlastHit|gi|78099970|sp|Q8T4J9.1|CU27_MANSE
5446	27	A	G	Locus_22165.0|BlastHit|gi|78099970|sp|Q8T4J9.1|CU27_MANSE
5446	30	A	G	Locus_22165.0|BlastHit|gi|78099970|sp|Q8T4J9.1|CU27_MANSE
5446	34	A	G	Locus_22165.0|BlastHit|gi|78099970|sp|Q8T4J9.1|CU27_MANSE
5446	39	T	C	Locus_22165.0|BlastHit|gi|78099970|sp|Q8T4J9.1|CU27_MANSE
5446	45	G	A	Locus_22165.0|BlastHit|gi|78099970|sp|Q8T4J9.1|CU27_MANSE
5446	47	C	T	Locus_22165.0|BlastHit|gi|78099970|sp|Q8T4J9.1|CU27_MANSE
5465	319	G	A	Locus_22207.0|BlastHit|gi|115502310|sp|Q0MQC7.1|NDUB2_PONPY
5482	747	G	A	Locus_22250.0|BlastHit|gi|46397431|sp|Q9H4G4.3|GAPR1_HUMAN
5483	1304	C	T	Locus_22251.0|BlastHit|gi|71153228|sp|Q8HXM1.1|CSTF2_BOVIN
5490	107	T	G,A	Locus_22260.0|BlastHit|gi|547984|sp|Q05752.2|NDUA7_BOVIN
5532	154	C	T	Locus_22312.0|BlastHit|gi|10720063|sp|O46108.1|LIP3_DROME
5535	89	G	A	Locus_22319.0|BlastHit|gi|136614|sp|P07607.1|TYSY_MOUSE
5539	1112	C	T	Locus_22322.0|BlastHit|gi|730031|sp|P40423.1|SQH_DROME
5539	1113	G	A	Locus_22322.0|BlastHit|gi|730031|sp|P40423.1|SQH_DROME
5539	891	A	C	Locus_22322.0|BlastHit|gi|730031|sp|P40423.1|SQH_DROME
5557	561	C	T	Locus_22354.0|BlastHit|gi|1171862|sp|P42028.1|NDUS8_BOVIN
5557	81	G	A	Locus_22354.0|BlastHit|gi|1171862|sp|P42028.1|NDUS8_BOVIN
5575	772	G	A	Locus_22382.0|BlastHit|gi|190358744|sp|P0C7P0.1|CISD3_HUMAN
5593	753	C	T	Locus_22413.0|BlastHit|gi|68565951|sp|Q9V3U2.1|NHP2_DROME
5593	780	A	G	Locus_22413.0|BlastHit|gi|68565951|sp|Q9V3U2.1|NHP2_DROME
5595	498	A	G	Locus_22426.0|BlastHit|gi|75571440|sp|Q5ZM33.1|HP1B3_CHICK
5629	755	G	C	Locus_22468.0|BlastHit|gi|3914023|sp|O43772.1|MCAT_HUMAN
5643	344	C	T	Locus_22499.0|BlastHit|gi|52783086|sp|Q921Y2.1|IMP3_MOUSE
5654	245	T	A	Locus_22514.0|BlastHit|gi|82184989|sp|Q6IQE9.1|ALKB6_DANRE
5654	545	C	T	Locus_22514.0|BlastHit|gi|82184989|sp|Q6IQE9.1|ALKB6_DANRE
5666	228	C	T	Locus_22536.0|BlastHit|gi|24418650|sp|Q962T2.1|RL28_SPOFR
5666	474	G	A	Locus_22536.0|BlastHit|gi|24418650|sp|Q962T2.1|RL28_SPOFR
5689	968	T	C	Locus_22564.0|BlastHit|gi|118373|sp|P27117.1|DCOR_BOVIN
5701	287	C	T	Locus_22582.0|BlastHit|gi|55584057|sp|P29844.2|HSP7C_DROME
5710	1981	T	C	Locus_22592.0|BlastHit|gi|135628|sp|P29052.1|TF2B_DROME
5718	448	G	A	Locus_22605.0|BlastHit|gi|730564|sp|P39872.2|RL3_BOVIN
5718	593	A	G	Locus_22605.0|BlastHit|gi|730564|sp|P39872.2|RL3_BOVIN
5733	3502	A	C	Locus_22625.0|BlastHit|gi|74755121|sp|Q58EX7.1|PKHG4_HUMAN
5737	372	G	T	Locus_22632.0|BlastHit|gi|13959572|sp|Q9VZD5.1|RT06_DROME
5737	453	A	G	Locus_22632.0|BlastHit|gi|13959572|sp|Q9VZD5.1|RT06_DROME
5761	1248	C	T	Locus_22665.1|BlastHit|gi|82177041|sp|Q803G5.1|SAM5A_DANRE
5761	1550	G	A	Locus_22665.1|BlastHit|gi|82177041|sp|Q803G5.1|SAM5A_DANRE
5761	1820	C	T	Locus_22665.1|BlastHit|gi|82177041|sp|Q803G5.1|SAM5A_DANRE
5761	984	T	C	Locus_22665.1|BlastHit|gi|82177041|sp|Q803G5.1|SAM5A_DANRE
5773	1240	A	G	Locus_22684.0|BlastHit|gi|17369774|sp|Q9VMV6.1|SELT_DROME
5777	375	T	A	Locus_22689.0|BlastHit|gi|12230175|sp|Q9VYD7.1|TIM9_DROME
5779	776	A	C	Locus_22696.0|BlastHit|gi|82178683|sp|Q5BL56.1|HMGX4_XENTR
5789	1426	G	A	Locus_22707.0|BlastHit|gi|49066053|sp|Q9NFT7.4|HXK2_DROME
5789	934	G	A	Locus_22707.0|BlastHit|gi|49066053|sp|Q9NFT7.4|HXK2_DROME
5790	714	A	G	Locus_22708.0|BlastHit|gi|121958854|sp|Q1HPL8.1|NDUBA_BOMMO
5790	91	G	C	Locus_22708.0|BlastHit|gi|121958854|sp|Q1HPL8.1|NDUBA_BOMMO
5811	843	T	C	Locus_22728.0|BlastHit|gi|135051|sp|Q00492.1|SUM1_LYTVA
5826	1254	G	A	Locus_22745.0|BlastHit|gi|47606794|sp|Q9V3J1.2|VATH_DROME
5829	142	T	C	Locus_22749.0|BlastHit|gi|82181849|sp|Q68FI3.1|DOPDA_XENLA
5829	234	G	T	Locus_22749.0|BlastHit|gi|82181849|sp|Q68FI3.1|DOPDA_XENLA
5829	318	A	T	Locus_22749.0|BlastHit|gi|82181849|sp|Q68FI3.1|DOPDA_XENLA
5829	73	A	G	Locus_22749.0|BlastHit|gi|82181849|sp|Q68FI3.1|DOPDA_XENLA
5847	794	G	A	Locus_22779.0|BlastHit|gi|62298260|sp|P32234.2|128UP_DROME
5847	797	A	G	Locus_22779.0|BlastHit|gi|62298260|sp|P32234.2|128UP_DROME
5872	586	C	G	Locus_22798.0|BlastHit|gi|29839616|sp|Q9CRC3.1|CO040_MOUSE
5891	231	G	A	Locus_22822.0|BlastHit|gi|134095|sp|P08579.1|RU2B_HUMAN
5891	286	A	T	Locus_22822.0|BlastHit|gi|134095|sp|P08579.1|RU2B_HUMAN
5891	783	T	A	Locus_22822.0|BlastHit|gi|134095|sp|P08579.1|RU2B_HUMAN
5891	789	C	A	Locus_22822.0|BlastHit|gi|134095|sp|P08579.1|RU2B_HUMAN
5891	876	G	A	Locus_22822.0|BlastHit|gi|134095|sp|P08579.1|RU2B_HUMAN
5895	847	T	C	Locus_22832.0|BlastHit|gi|81866042|sp|Q80ZA4.1|PKHL1_MOUSE
5895	850	G	A	Locus_22832.0|BlastHit|gi|81866042|sp|Q80ZA4.1|PKHL1_MOUSE
5904	472	T	C	Locus_22851.0|BlastHit|gi|338817662|sp|C0KJQ4.2|ALPS_PORTR
5905	1011	G	T	Locus_22853.0|BlastHit|gi|129693|sp|P17917.2|PCNA_DROME
5905	1073	G	T	Locus_22853.0|BlastHit|gi|129693|sp|P17917.2|PCNA_DROME
5905	184	T	C	Locus_22853.0|BlastHit|gi|129693|sp|P17917.2|PCNA_DROME
5909	793	A	C	Locus_22869.0|BlastHit|gi|187668012|sp|B0BLT0.1|ZN593_XENTR
5915	3107	G	A	Locus_22886.0|BlastHit|gi|1703012|sp|P49902.1|5NTC_HUMAN
5920	302	G	A	Locus_22896.0|BlastHit|gi|82184223|sp|Q6GNI4.1|EIF3K_XENLA
5920	355	G	A	Locus_22896.0|BlastHit|gi|82184223|sp|Q6GNI4.1|EIF3K_XENLA
5920	635	T	G	Locus_22896.0|BlastHit|gi|82184223|sp|Q6GNI4.1|EIF3K_XENLA
5923	144	A	G	Locus_22900.0|BlastHit|gi|122140367|sp|Q3T0E1.1|EXOS3_BOVIN
5931	1393	G	C	Locus_22910.3|BlastHit|gi|3183518|sp|Q05397.2|FAK1_HUMAN
5957	479	A	T	Locus_22943.0|BlastHit|gi|24638220|sp|Q9CXL1.1|TM50A_MOUSE
5957	995	T	A	Locus_22943.0|BlastHit|gi|24638220|sp|Q9CXL1.1|TM50A_MOUSE
5965	1457	C	A	Locus_22951.0|BlastHit|gi|341940678|sp|Q91Y47.2|FA11_MOUSE
5965	1472	G	A	Locus_22951.0|BlastHit|gi|341940678|sp|Q91Y47.2|FA11_MOUSE
5966	81	C	A	Locus_22961.0|BlastHit|gi|82177183|sp|Q8AVH4.1|PNO1_XENLA
5967	2508	G	A	Locus_22964.0|BlastHit|gi|82183742|sp|Q6GL04.1|TERA_XENTR
5979	577	C	T	Locus_22982.0|BlastHit|gi|20140087|sp|Q90XD2.1|SPEB_CHICK
6006	4442	G	A	Locus_23019.1|BlastHit|gi|76363525|sp|P83501.2|MSTAB_DROME
6006	4448	A	G	Locus_23019.1|BlastHit|gi|76363525|sp|P83501.2|MSTAB_DROME
6018	321	A	T	Locus_23029.0|BlastHit|gi|74733402|sp|Q9BW72.1|HIG2A_HUMAN
6018	501	G	A	Locus_23029.0|BlastHit|gi|74733402|sp|Q9BW72.1|HIG2A_HUMAN
6021	492	A	T	Locus_23038.0|BlastHit|gi|3287776|sp|P81388.1|CU04_HOMAM
6021	494	C	G	Locus_23038.0|BlastHit|gi|3287776|sp|P81388.1|CU04_HOMAM
6021	587	A	G	Locus_23038.0|BlastHit|gi|3287776|sp|P81388.1|CU04_HOMAM
6022	443	T	C	Locus_23038.0|BlastHit|gi|3287776|sp|P81388.1|CU04_HOMAM
6022	497	T	G	Locus_23038.0|BlastHit|gi|3287776|sp|P81388.1|CU04_HOMAM
6022	565	A	T	Locus_23038.0|BlastHit|gi|3287776|sp|P81388.1|CU04_HOMAM
6022	98	G	A	Locus_23038.0|BlastHit|gi|3287776|sp|P81388.1|CU04_HOMAM
6024	199	A	G	Locus_23041.0|BlastHit|gi|81878771|sp|Q8R0J7.1|VP37B_MOUSE
6024	640	G	A	Locus_23041.0|BlastHit|gi|81878771|sp|Q8R0J7.1|VP37B_MOUSE
6024	670	G	A	Locus_23041.0|BlastHit|gi|81878771|sp|Q8R0J7.1|VP37B_MOUSE
6024	694	C	T	Locus_23041.0|BlastHit|gi|81878771|sp|Q8R0J7.1|VP37B_MOUSE
6043	568	C	A	Locus_23054.1|BlastHit|gi|1717869|sp|P45974.2|UBP5_HUMAN
6044	97	T	C	Locus_23055.0|BlastHit|gi|3122049|sp|Q14117.1|DPYS_HUMAN
6084	1054	T	A	Locus_23118.0|BlastHit|gi|26006755|sp|Q26061.1|FRI_PACLE
6084	1167	A	G	Locus_23118.0|BlastHit|gi|26006755|sp|Q26061.1|FRI_PACLE
6084	1192	C	T	Locus_23118.0|BlastHit|gi|26006755|sp|Q26061.1|FRI_PACLE
6084	1319	G	A	Locus_23118.0|BlastHit|gi|26006755|sp|Q26061.1|FRI_PACLE
6084	828	C	T	Locus_23118.0|BlastHit|gi|26006755|sp|Q26061.1|FRI_PACLE
6084	989	G	A	Locus_23118.0|BlastHit|gi|26006755|sp|Q26061.1|FRI_PACLE
6090	1143	T	C	Locus_23131.0|BlastHit|gi|3915086|sp|Q25008.1|TBA1_HOMAM
6100	1980	G	A	Locus_23147.0|BlastHit|gi|20140568|sp|Q13148.1|TADBP_HUMAN
6100	240	G	A	Locus_23147.0|BlastHit|gi|20140568|sp|Q13148.1|TADBP_HUMAN
6100	5508	A	G	Locus_23147.0|BlastHit|gi|20140568|sp|Q13148.1|TADBP_HUMAN
6101	1211	C	T	Locus_23148.0|BlastHit|gi|1168849|sp|P41731.2|CD63_MOUSE
6108	81	T	G	Locus_23157.0|BlastHit|gi|10720057|sp|Q9VAS7.1|INX3_DROME
6123	288	T	A	Locus_23175.0|BlastHit|gi|172048426|sp|A9ULE9.1|DJC22_XENTR
6128	482	T	C	Locus_23182.0|BlastHit|gi|83286899|sp|P69478.1|CHSTB_RAT
6151	258	C	A	Locus_23194.0|BlastHit|gi|113293|sp|P26183.1|ACT_CRYPV
6151	259	T	C	Locus_23194.0|BlastHit|gi|113293|sp|P26183.1|ACT_CRYPV
6151	261	G	A	Locus_23194.0|BlastHit|gi|113293|sp|P26183.1|ACT_CRYPV
6151	270	C	G	Locus_23194.0|BlastHit|gi|113293|sp|P26183.1|ACT_CRYPV
6151	273	G	A	Locus_23194.0|BlastHit|gi|113293|sp|P26183.1|ACT_CRYPV
6156	1729	T	A	Locus_23205.0|BlastHit|gi|145559516|sp|O15018.4|PDZD2_HUMAN
6158	833	G	A	Locus_23210.0|BlastHit|gi|55976220|sp|O88543.3|CSN3_MOUSE
6162	818	G	C	Locus_23214.1|BlastHit|gi|136032|sp|P06708.1|TNNC2_PONLE
6162	825	T	C	Locus_23214.1|BlastHit|gi|136032|sp|P06708.1|TNNC2_PONLE
6162	835	C	T	Locus_23214.1|BlastHit|gi|136032|sp|P06708.1|TNNC2_PONLE
6172	1041	G	C	Locus_23229.0|BlastHit|gi|112987|sp|P00507.2|AATM_RAT
6172	1050	G	A	Locus_23229.0|BlastHit|gi|112987|sp|P00507.2|AATM_RAT
6172	1424	C	G	Locus_23229.0|BlastHit|gi|112987|sp|P00507.2|AATM_RAT
6172	1427	A	G	Locus_23229.0|BlastHit|gi|112987|sp|P00507.2|AATM_RAT
6172	1549	C	A	Locus_23229.0|BlastHit|gi|112987|sp|P00507.2|AATM_RAT
6172	186	G	A	Locus_23229.0|BlastHit|gi|112987|sp|P00507.2|AATM_RAT
6172	939	C	T	Locus_23229.0|BlastHit|gi|112987|sp|P00507.2|AATM_RAT
6177	1035	C	T	Locus_23235.0|BlastHit|gi|110825729|sp|P05661.4|MYSA_DROME
6187	244	G	A	Locus_23255.0|BlastHit|gi|74868306|sp|Q9VCC3.1|RT24_DROME
6187	487	C	T	Locus_23255.0|BlastHit|gi|74868306|sp|Q9VCC3.1|RT24_DROME
6187	588	A	T	Locus_23255.0|BlastHit|gi|74868306|sp|Q9VCC3.1|RT24_DROME
6189	1944	A	T	Locus_23259.0|BlastHit|gi|9087114|sp|O08918.3|CCNG2_MOUSE
6189	3309	G	A	Locus_23259.0|BlastHit|gi|9087114|sp|O08918.3|CCNG2_MOUSE
6205	1091	G	A	Locus_23273.0|BlastHit|gi|62900887|sp|Q9W0T5.2|PYX_DROME
6206	1060	C	A	Locus_23276.0|BlastHit|gi|76800653|sp|Q05319.2|STUB_DROME
6206	1394	T	C	Locus_23276.0|BlastHit|gi|76800653|sp|Q05319.2|STUB_DROME
6206	571	C	G	Locus_23276.0|BlastHit|gi|76800653|sp|Q05319.2|STUB_DROME
6217	232	A	G	Locus_23288.0|BlastHit|gi|52000827|sp|Q8HXG6.3|NDUAB_BOVIN
6241	987	C	T	Locus_23296.0|BlastHit|gi|62906874|sp|Q13685.2|AAMP_HUMAN
6248	254	C	T	Locus_23307.0|BlastHit|gi|73920863|sp|P81139.1|LIPR2_CAVPO
6253	143	G	T,A	Locus_23315.0|BlastHit|gi|6919838|sp|Q9X248.1|FABG_THEMA
6257	5057	G	A	Locus_23327.0|BlastHit|gi|51701863|sp|Q9V3H2.1|PSDE_DROME
6257	5129	G	A	Locus_23327.0|BlastHit|gi|51701863|sp|Q9V3H2.1|PSDE_DROME
6258	132	T	A	Locus_23328.0|BlastHit|gi|47606778|sp|P80601.3|UK114_CAPHI
6258	698	T	G	Locus_23328.0|BlastHit|gi|47606778|sp|P80601.3|UK114_CAPHI
6258	702	C	T	Locus_23328.0|BlastHit|gi|47606778|sp|P80601.3|UK114_CAPHI
6261	1143	G	A	Locus_23334.0|BlastHit|gi|130859|sp|P25788.2|PSA3_HUMAN
6261	728	T	C	Locus_23334.0|BlastHit|gi|130859|sp|P25788.2|PSA3_HUMAN
6265	1258	A	G	Locus_23347.0|BlastHit|gi|116242812|sp|P29083.2|T2EA_HUMAN
6270	482	T	A	Locus_23361.0|BlastHit|gi|116248088|sp|Q32L93.1|GMPR2_BOVIN
6317	396	G	C	Locus_23424.0|BlastHit|gi|50401204|sp|Q9VCA2.1|ORCT_DROME
6345	1322	A	G	Locus_23454.0|BlastHit|gi|88909244|sp|P84173.1|PHB_CHICK
6349	157	T	C	Locus_23457.0|BlastHit|gi|1709879|sp|P50404.1|SFTPD_MOUSE
6349	511	T	C	Locus_23457.0|BlastHit|gi|1709879|sp|P50404.1|SFTPD_MOUSE
6364	1089	T	C	Locus_23475.0|BlastHit|gi|212288111|sp|B1H2T2.1|CC058_XENTR
6364	468	C	T	Locus_23475.0|BlastHit|gi|212288111|sp|B1H2T2.1|CC058_XENTR
6366	1213	T	C	Locus_23479.0|BlastHit|gi|45476845|sp|Q7TMF2.2|ERI1_MOUSE
6368	2571	A	G	Locus_23482.0|BlastHit|gi|229462993|sp|Q9VEG6.3|PERC_DROME
6368	631	G	C	Locus_23482.0|BlastHit|gi|229462993|sp|Q9VEG6.3|PERC_DROME
6371	229	G	T	Locus_23489.0|BlastHit|gi|74734684|sp|Q9NX20.1|RM16_HUMAN
6381	525	A	G	Locus_23494.0|BlastHit|gi|134312|sp|P02636.1|SCPA_PENSP
6382	1830	A	G	Locus_23495.0|BlastHit|gi|122125964|sp|Q4N4N8.1|TXND_THEPA
6382	1858	G	C	Locus_23495.0|BlastHit|gi|122125964|sp|Q4N4N8.1|TXND_THEPA
6404	672	C	A	Locus_23526.0|BlastHit|gi|81883151|sp|Q5M954.1|SEN2_RAT
6412	72	A	G	Locus_23543.0|BlastHit|gi|317373385|sp|O75581.2|LRP6_HUMAN
6412	73	T	C	Locus_23543.0|BlastHit|gi|317373385|sp|O75581.2|LRP6_HUMAN
6437	1140	A	G	Locus_23566.0|BlastHit|gi|224488019|sp|B5DGH9.1|EIF3E_SALSA
6437	1303	C	T	Locus_23566.0|BlastHit|gi|224488019|sp|B5DGH9.1|EIF3E_SALSA
6437	634	T	C	Locus_23566.0|BlastHit|gi|224488019|sp|B5DGH9.1|EIF3E_SALSA
6437	883	T	C	Locus_23566.0|BlastHit|gi|224488019|sp|B5DGH9.1|EIF3E_SALSA
6439	402	T	C	Locus_23568.0|BlastHit|gi|73917775|sp|Q503V0.3|CHMP6_DANRE
6439	769	G	A	Locus_23568.0|BlastHit|gi|73917775|sp|Q503V0.3|CHMP6_DANRE
6446	220	G	A	Locus_23575.0|BlastHit|gi|135400|sp|P18258.1|TBA1_PARLI
6453	152	G	A	Locus_23587.0|BlastHit|gi|123900566|sp|Q3KRG3.1|TSR2_DANRE
6453	590	T	C	Locus_23587.0|BlastHit|gi|123900566|sp|Q3KRG3.1|TSR2_DANRE
6487	397	G	A	Locus_23601.0|BlastHit|gi|12230174|sp|Q9VTN3.1|TIM13_DROME
6487	811	T	C	Locus_23601.0|BlastHit|gi|12230174|sp|Q9VTN3.1|TIM13_DROME
6494	289	C	T	Locus_23614.0|BlastHit|gi|76364210|sp|Q6AXX4.1|SAS10_RAT
6494	511	G	A	Locus_23614.0|BlastHit|gi|76364210|sp|Q6AXX4.1|SAS10_RAT
6495	759	A	T	Locus_23619.0|BlastHit|gi|146345383|sp|P00920.4|CAH2_MOUSE
6499	466	G	A	Locus_23628.0|BlastHit|gi|223635262|sp|A7GPY2.1|KYNB_BACCN
6509	1253	G	A	Locus_23652.0|BlastHit|gi|152031623|sp|P02515.4|HSP22_DROME
6509	1393	T	C	Locus_23652.0|BlastHit|gi|152031623|sp|P02515.4|HSP22_DROME
6509	348	C	G	Locus_23652.0|BlastHit|gi|152031623|sp|P02515.4|HSP22_DROME
6515	575	C	T	Locus_23657.0|BlastHit|gi|166225652|sp|A1L1C5.1|URAD_XENLA
6515	578	G	A	Locus_23657.0|BlastHit|gi|166225652|sp|A1L1C5.1|URAD_XENLA
6516	2771	T	C	Locus_23658.0|BlastHit|gi|119651|sp|P18756.1|ETS1B_XENLA
6520	1032	G	A	Locus_23665.0|BlastHit|gi|3024084|sp|Q26474.1|LACH_SCHAM
6520	1037	A	C	Locus_23665.0|BlastHit|gi|3024084|sp|Q26474.1|LACH_SCHAM
6520	1199	A	G	Locus_23665.0|BlastHit|gi|3024084|sp|Q26474.1|LACH_SCHAM
6520	935	G	A	Locus_23665.0|BlastHit|gi|3024084|sp|Q26474.1|LACH_SCHAM
6526	444	A	C	Locus_23680.0|BlastHit|gi|14285410|sp|Q9Y3B2.1|EXOS1_HUMAN
6530	1442	C	T	Locus_23689.0|BlastHit|gi|38372258|sp|Q9VCY8.2|ADRL_DROME
6530	1730	C	T	Locus_23689.0|BlastHit|gi|38372258|sp|Q9VCY8.2|ADRL_DROME
6530	178	T	C	Locus_23689.0|BlastHit|gi|38372258|sp|Q9VCY8.2|ADRL_DROME
6570	721	C	T	Locus_23738.0|BlastHit|gi|33301416|sp|Q9D0S4.1|NEUL2_MOUSE
6571	515	C	T	Locus_23740.0|BlastHit|gi|160409939|sp|A2ARV4.1|LRP2_MOUSE
6581	392	G	A	Locus_23749.0|BlastHit|gi|23822301|sp|Q9CY21.1|WBS22_MOUSE
6587	1064	G	A	Locus_23760.0|BlastHit|gi|62901121|sp|Q9JHB5.1|TSNAX_RAT
6587	1078	G	A	Locus_23760.0|BlastHit|gi|62901121|sp|Q9JHB5.1|TSNAX_RAT
6587	1124	C	T	Locus_23760.0|BlastHit|gi|62901121|sp|Q9JHB5.1|TSNAX_RAT
6588	2133	A	T	Locus_23761.0|BlastHit|gi|341942208|sp|Q8BZ20.3|PAR12_MOUSE
6596	2494	A	G	Locus_23775.0|BlastHit|gi|30580619|sp|P70191.1|TRAF5_MOUSE
6601	317	G	A	Locus_23784.0|BlastHit|gi|50401534|sp|Q7ZW41.1|RPB7_DANRE
6624	738	A	C	Locus_23826.0|BlastHit|gi|1351219|sp|P43025.2|TETN_MOUSE
6624	78	T	C	Locus_23826.0|BlastHit|gi|1351219|sp|P43025.2|TETN_MOUSE
6626	140	A	T	Locus_23831.0|BlastHit|gi|135232|sp|P29084.1|T2EB_HUMAN
6626	405	A	G	Locus_23831.0|BlastHit|gi|135232|sp|P29084.1|T2EB_HUMAN
6627	1134	C	T	Locus_23832.1|BlastHit|gi|20455166|sp|O08587.2|NUP50_RAT
6634	380	A	G	Locus_23855.0|BlastHit|gi|6226823|sp|P97576.2|GRPE1_RAT
6634	455	C	T	Locus_23855.0|BlastHit|gi|6226823|sp|P97576.2|GRPE1_RAT
6634	476	G	T	Locus_23855.0|BlastHit|gi|6226823|sp|P97576.2|GRPE1_RAT
6634	650	A	G	Locus_23855.0|BlastHit|gi|6226823|sp|P97576.2|GRPE1_RAT
6634	695	A	G	Locus_23855.0|BlastHit|gi|6226823|sp|P97576.2|GRPE1_RAT
6634	813	G	A	Locus_23855.0|BlastHit|gi|6226823|sp|P97576.2|GRPE1_RAT
6638	1832	G	T	Locus_23860.0|BlastHit|gi|59803098|sp|Q16851.5|UGPA_HUMAN
6638	2270	A	T	Locus_23860.0|BlastHit|gi|59803098|sp|Q16851.5|UGPA_HUMAN
6638	2317	A	T	Locus_23860.0|BlastHit|gi|59803098|sp|Q16851.5|UGPA_HUMAN
6640	678	C	T	Locus_23865.0|BlastHit|gi|122063429|sp|Q3T168.1|CYBP_BOVIN
6643	3782	T	C	Locus_23868.0|BlastHit|gi|18266783|sp|O55029.2|COPB2_MOUSE
6673	2613	A	T	Locus_23922.0|BlastHit|gi|46396017|sp|Q9NZN8.1|CNOT2_HUMAN
6674	1169	T	G	Locus_23926.0|BlastHit|gi|6166046|sp|Q63699.1|CDK2_RAT
6674	671	C	T	Locus_23926.0|BlastHit|gi|6166046|sp|Q63699.1|CDK2_RAT
6674	711	T	C	Locus_23926.0|BlastHit|gi|6166046|sp|Q63699.1|CDK2_RAT
6674	953	G	A	Locus_23926.0|BlastHit|gi|6166046|sp|Q63699.1|CDK2_RAT
6686	1192	T	C	Locus_23954.0|BlastHit|gi|7387725|sp|Q9WVK7.1|HCDH_RAT
6699	158	A	T	Locus_23975.0|BlastHit|gi|341940516|sp|Q9JLB4.3|CUBN_MOUSE
6699	186	T	C	Locus_23975.0|BlastHit|gi|341940516|sp|Q9JLB4.3|CUBN_MOUSE
6699	532	G	T	Locus_23975.0|BlastHit|gi|341940516|sp|Q9JLB4.3|CUBN_MOUSE
6699	820	A	G	Locus_23975.0|BlastHit|gi|341940516|sp|Q9JLB4.3|CUBN_MOUSE
6712	522	G	C	Locus_23997.0|BlastHit|gi|2851405|sp|P29294.2|MYLK_RABIT
6715	135	G	A	Locus_24000.0|BlastHit|gi|465731|sp|P34276.1|YKJ2_CAEEL
6715	302	C	T	Locus_24000.0|BlastHit|gi|465731|sp|P34276.1|YKJ2_CAEEL
6715	557	G	C	Locus_24000.0|BlastHit|gi|465731|sp|P34276.1|YKJ2_CAEEL
6715	876	T	C	Locus_24000.0|BlastHit|gi|465731|sp|P34276.1|YKJ2_CAEEL
6729	290	T	C	Locus_24022.0|BlastHit|gi|119370351|sp|Q9JLL0.2|CRIM1_MOUSE
6729	952	G	A	Locus_24022.0|BlastHit|gi|119370351|sp|Q9JLL0.2|CRIM1_MOUSE
6749	120	C	T	Locus_24041.0|BlastHit|gi|66774115|sp|Q38813.2|DNAJ1_ARATH
6749	208	T	A	Locus_24041.0|BlastHit|gi|66774115|sp|Q38813.2|DNAJ1_ARATH
6749	863	C	A	Locus_24041.0|BlastHit|gi|66774115|sp|Q38813.2|DNAJ1_ARATH
6771	1253	G	A	Locus_24070.0|BlastHit|gi|37999713|sp|Q8N806.2|UBR7_HUMAN
6771	1334	T	A	Locus_24070.0|BlastHit|gi|37999713|sp|Q8N806.2|UBR7_HUMAN
6771	1337	C	T	Locus_24070.0|BlastHit|gi|37999713|sp|Q8N806.2|UBR7_HUMAN
6771	479	A	T,C	Locus_24070.0|BlastHit|gi|37999713|sp|Q8N806.2|UBR7_HUMAN
6779	62	G	C,T	Locus_24090.0|BlastHit|gi|21263796|sp|Q9Z2Q5.2|RM40_MOUSE
6782	1002	C	T	Locus_24093.0|BlastHit|gi|13124084|sp|Q9QXK3.1|COPG2_MOUSE
6796	1114	C	T	Locus_24119.0|BlastHit|gi|74848914|sp|Q9GV27.1|EIF3H_BOMMO
6796	1265	A	T	Locus_24119.0|BlastHit|gi|74848914|sp|Q9GV27.1|EIF3H_BOMMO
6796	268	T	C	Locus_24119.0|BlastHit|gi|74848914|sp|Q9GV27.1|EIF3H_BOMMO
6796	394	C	T	Locus_24119.0|BlastHit|gi|74848914|sp|Q9GV27.1|EIF3H_BOMMO
6796	787	C	G	Locus_24119.0|BlastHit|gi|74848914|sp|Q9GV27.1|EIF3H_BOMMO
6796	997	G	A	Locus_24119.0|BlastHit|gi|74848914|sp|Q9GV27.1|EIF3H_BOMMO
6800	3004	C	T	Locus_24126.0|BlastHit|gi|251757329|sp|Q96T23.2|RSF1_HUMAN
6807	1323	C	T	Locus_24133.0|BlastHit|gi|30581054|sp|P48601.2|PRS4_DROME
6812	664	A	T	Locus_24141.0|BlastHit|gi|71152389|sp|Q9CQF4.1|CF203_MOUSE
6817	1478	C	G	Locus_24153.0|BlastHit|gi|11386857|sp|Q9W0P5.1|GALE_DROME
6817	1649	C	T	Locus_24153.0|BlastHit|gi|11386857|sp|Q9W0P5.1|GALE_DROME
6817	281	G	A	Locus_24153.0|BlastHit|gi|11386857|sp|Q9W0P5.1|GALE_DROME
6822	515	G	T	Locus_24158.0|BlastHit|gi|67461733|sp|Q68FW4.1|STX18_RAT
6823	119	A	G	Locus_24160.0|BlastHit|gi|23396475|sp|Q9VF08.1|TIM16_DROME
6823	124	C	T	Locus_24160.0|BlastHit|gi|23396475|sp|Q9VF08.1|TIM16_DROME
6823	643	C	T	Locus_24160.0|BlastHit|gi|23396475|sp|Q9VF08.1|TIM16_DROME
6823	794	G	A	Locus_24160.0|BlastHit|gi|23396475|sp|Q9VF08.1|TIM16_DROME
6824	291	C	T	Locus_24161.0|BlastHit|gi|52782766|sp|Q9Z336.1|DYLT1_RAT
6836	781	A	G	Locus_24178.0|BlastHit|gi|73621224|sp|P0C090.1|RC3H2_MOUSE
6837	120	G	A	Locus_24182.0|BlastHit|gi|57013083|sp|Q8JG30.1|ST1B1_CHICK
6853	8225	T	G	Locus_24194.0|BlastHit|gi|68844926|sp|P51592.3|HYD_DROME
6855	108	C	T	Locus_24196.0|BlastHit|gi|75027154|sp|Q9VLJ9.2|RM51_DROME
6855	643	A	G	Locus_24196.0|BlastHit|gi|75027154|sp|Q9VLJ9.2|RM51_DROME
6864	1046	C	T	Locus_24214.1|BlastHit|gi|75041948|sp|Q5RAX0.1|PAF1_PONAB
6870	2400	T	G	Locus_24222.0|BlastHit|gi|325530038|sp|P0CL18.1|EIF2D_RABIT
6870	2415	A	T	Locus_24222.0|BlastHit|gi|325530038|sp|P0CL18.1|EIF2D_RABIT
6870	477	T	G	Locus_24222.0|BlastHit|gi|325530038|sp|P0CL18.1|EIF2D_RABIT
6871	255	C	T	Locus_24229.0|BlastHit|gi|34395789|sp|Q8TC12.2|RDH11_HUMAN
6900	272	C	A	Locus_24258.0|BlastHit|gi|1703326|sp|P50583.3|AP4A_HUMAN
6902	597	T	A	Locus_24263.0|BlastHit|gi|132171|sp|P23800.1|RCC1_MESAU
6907	241	T	C	Locus_24276.0|BlastHit|gi|109892092|sp|Q5E9V6.2|COMD4_BOVIN
6907	250	C	T	Locus_24276.0|BlastHit|gi|109892092|sp|Q5E9V6.2|COMD4_BOVIN
6907	735	T	C	Locus_24276.0|BlastHit|gi|109892092|sp|Q5E9V6.2|COMD4_BOVIN
6908	260	G	C,A	Locus_24277.0|BlastHit|gi|22001929|sp|Q9VFJ2.1|RM11_DROME
6917	382	G	A	Locus_24286.0|BlastHit|gi|543797|sp|P07764.5|ALF_DROME
6921	1296	C	A	Locus_24299.0|BlastHit|gi|269849749|sp|P00637.4|F16P1_RABIT
6923	302	C	T	Locus_24301.0|BlastHit|gi|81884465|sp|Q6AXT0.1|RM37_RAT
6939	1042	A	G	Locus_24323.0|BlastHit|gi|50400598|sp|Q92624.2|APBP2_HUMAN
6940	700	A	T	Locus_24323.1|BlastHit|gi|41688588|sp|Q8VI75.1|IPO4_MOUSE
6952	458	G	C	Locus_24342.0|BlastHit|gi|126131|sp|P02707.1|LECH_CHICK
6954	1097	T	C	Locus_24345.0|BlastHit|gi|55584057|sp|P29844.2|HSP7C_DROME
6959	1005	C	T	Locus_24354.0|BlastHit|gi|122135715|sp|Q2HJ98.1|FAHD1_BOVIN
6971	1256	G	T	Locus_24379.0|BlastHit|gi|12229745|sp|O76071.1|CIAO1_HUMAN
6971	231	G	A	Locus_24379.0|BlastHit|gi|12229745|sp|O76071.1|CIAO1_HUMAN
6990	752	C	A	Locus_24401.0|BlastHit|gi|13124116|sp|Q9WTS8.2|FCN1_RAT
6994	527	T	C	Locus_24412.0|BlastHit|gi|122098012|sp|Q297A7.1|FA203_DROPS
6994	940	C	T	Locus_24412.0|BlastHit|gi|122098012|sp|Q297A7.1|FA203_DROPS
7004	1023	G	A	Locus_24428.0|BlastHit|gi|13124554|sp|O44437.1|SMD3_DROME
7004	285	A	C	Locus_24428.0|BlastHit|gi|13124554|sp|O44437.1|SMD3_DROME
7014	1055	C	T	Locus_24447.0|BlastHit|gi|14916636|sp|Q9XTL9.2|PYG_DROME
7014	443	G	T	Locus_24447.0|BlastHit|gi|14916636|sp|Q9XTL9.2|PYG_DROME
7014	521	C	A	Locus_24447.0|BlastHit|gi|14916636|sp|Q9XTL9.2|PYG_DROME
7014	974	C	T	Locus_24447.0|BlastHit|gi|14916636|sp|Q9XTL9.2|PYG_DROME
7017	1141	G	C	Locus_24454.0|BlastHit|gi|294862526|sp|Q2KJC9.4|AL7A1_BOVIN
7017	82	T	C	Locus_24454.0|BlastHit|gi|294862526|sp|Q2KJC9.4|AL7A1_BOVIN
7021	1871	C	T	Locus_24460.0|BlastHit|gi|28381357|sp|Q9UI10.2|EI2BD_HUMAN
7042	538	T	C	Locus_24472.0|BlastHit|gi|82229908|sp|Q561P5.1|MCM5_XENTR
7042	58	G	C	Locus_24472.0|BlastHit|gi|82229908|sp|Q561P5.1|MCM5_XENTR
7043	450	T	C	Locus_24473.0|BlastHit|gi|50401156|sp|Q9D1I5.1|MCEE_MOUSE
7046	741	G	A	Locus_24479.0|BlastHit|gi|12644471|sp|Q95078.2|CP18A_DROME
7047	1383	T	C	Locus_24486.0|BlastHit|gi|10720068|sp|Q9V447.1|KRH2_DROME
7050	337	C	T	Locus_24490.0|BlastHit|gi|41688711|sp|Q8MS27.1|RM35_DROME
7050	387	C	T	Locus_24490.0|BlastHit|gi|41688711|sp|Q8MS27.1|RM35_DROME
7050	635	A	C	Locus_24490.0|BlastHit|gi|41688711|sp|Q8MS27.1|RM35_DROME
7050	645	C	T	Locus_24490.0|BlastHit|gi|41688711|sp|Q8MS27.1|RM35_DROME
7050	83	T	A	Locus_24490.0|BlastHit|gi|41688711|sp|Q8MS27.1|RM35_DROME
7055	1553	C	T	Locus_24494.0|BlastHit|gi|73621181|sp|Q9EQZ5.1|PTGR1_CAVPO
7061	1077	G	A	Locus_24509.0|BlastHit|gi|73919440|sp|Q5M8Y1.1|SPCS2_XENTR
7071	923	C	T	Locus_24529.0|BlastHit|gi|170652901|sp|Q5TC12.1|ATPF1_HUMAN
7078	1059	T	G,A	Locus_24544.0|BlastHit|gi|24638035|sp|Q96EZ8.1|MCRS1_HUMAN
7080	1035	C	G	Locus_24550.0|BlastHit|gi|62901068|sp|O76021.3|RL1D1_HUMAN
7080	1148	G	A	Locus_24550.0|BlastHit|gi|62901068|sp|O76021.3|RL1D1_HUMAN
7080	1738	A	G	Locus_24550.0|BlastHit|gi|62901068|sp|O76021.3|RL1D1_HUMAN
7085	4507	G	C	Locus_24565.0|BlastHit|gi|548941|sp|P36975.1|SNP25_DROME
7103	1060	A	G	Locus_24578.0|BlastHit|gi|68565914|sp|Q8R2U6.1|NUDT4_MOUSE
7103	1195	C	G	Locus_24578.0|BlastHit|gi|68565914|sp|Q8R2U6.1|NUDT4_MOUSE
7103	1700	G	A	Locus_24578.0|BlastHit|gi|68565914|sp|Q8R2U6.1|NUDT4_MOUSE
7106	295	G	A	Locus_24581.0|BlastHit|gi|172048656|sp|A8YXY3.2|SEP15_BOVIN
7106	304	G	A	Locus_24581.0|BlastHit|gi|172048656|sp|A8YXY3.2|SEP15_BOVIN
7106	590	C	A	Locus_24581.0|BlastHit|gi|172048656|sp|A8YXY3.2|SEP15_BOVIN
7108	475	C	T	Locus_24583.0|BlastHit|gi|31340522|sp|P36241.2|RL19_DROME
7108	899	G	C	Locus_24583.0|BlastHit|gi|31340522|sp|P36241.2|RL19_DROME
7119	1773	A	C	Locus_24592.0|BlastHit|gi|73917752|sp|Q5XGW6.1|CHM4B_XENLA
7147	1067	C	T	Locus_24632.0|BlastHit|gi|74921277|sp|Q7QB13.2|CCNC_ANOGA
7147	469	C	T	Locus_24632.0|BlastHit|gi|74921277|sp|Q7QB13.2|CCNC_ANOGA
7163	205	T	C	Locus_24644.0|BlastHit|gi|129688|sp|P21902.1|PCE_TACTR
7166	368	C	T	Locus_24655.0|BlastHit|gi|75057940|sp|Q5EAC7.1|CPIN1_BOVIN
7168	1882	T	C	Locus_24658.0|BlastHit|gi|82179924|sp|Q5U3N5.1|PPTC7_DANRE
7168	82	A	C	Locus_24658.0|BlastHit|gi|82179924|sp|Q5U3N5.1|PPTC7_DANRE
7169	225	G	A	Locus_24659.0|BlastHit|gi|108884834|sp|Q13895.3|BYST_HUMAN
7173	712	C	T	Locus_24668.0|BlastHit|gi|46577123|sp|Q9GZU8.1|F192A_HUMAN
7180	1183	C	T	Locus_24681.0|BlastHit|gi|21542002|sp|Q24740.1|CDC37_DROVI
7180	1381	A	G	Locus_24681.0|BlastHit|gi|21542002|sp|Q24740.1|CDC37_DROVI
7181	837	A	T	Locus_24683.0|BlastHit|gi|32129447|sp|Q99LM2.1|CK5P3_MOUSE
7185	302	G	A	Locus_24689.0|BlastHit|gi|73921209|sp|Q9NV92.2|NFIP2_HUMAN
7185	894	G	A	Locus_24689.0|BlastHit|gi|73921209|sp|Q9NV92.2|NFIP2_HUMAN
7214	623	C	T	Locus_24734.0|BlastHit|gi|122079954|sp|Q3T7C9.1|DPH1_LITVA
7221	244	T	C	Locus_24750.0|BlastHit|gi|66773867|sp|Q5RA17.1|RRP7A_PONAB
7221	40	T	G	Locus_24750.0|BlastHit|gi|66773867|sp|Q5RA17.1|RRP7A_PONAB
7221	724	T	G	Locus_24750.0|BlastHit|gi|66773867|sp|Q5RA17.1|RRP7A_PONAB
7236	1199	T	C	Locus_24772.0|BlastHit|gi|585110|sp|P38117.3|ETFB_HUMAN
7236	891	G	A	Locus_24772.0|BlastHit|gi|585110|sp|P38117.3|ETFB_HUMAN
7236	959	C	T	Locus_24772.0|BlastHit|gi|585110|sp|P38117.3|ETFB_HUMAN
7237	919	T	C	Locus_24772.0|BlastHit|gi|585110|sp|P38117.3|ETFB_HUMAN
7238	464	T	C	Locus_24776.0|BlastHit|gi|117949806|sp|P05552.2|ADF1_DROME
7238	85	A	C	Locus_24776.0|BlastHit|gi|117949806|sp|P05552.2|ADF1_DROME
7242	112	C	T	Locus_24783.0|BlastHit|gi|82176771|sp|Q7ZYA2.1|TAF8_XENLA
7242	511	C	T	Locus_24783.0|BlastHit|gi|82176771|sp|Q7ZYA2.1|TAF8_XENLA
7242	514	G	A	Locus_24783.0|BlastHit|gi|82176771|sp|Q7ZYA2.1|TAF8_XENLA
7242	619	A	T	Locus_24783.0|BlastHit|gi|82176771|sp|Q7ZYA2.1|TAF8_XENLA
7242	82	A	C	Locus_24783.0|BlastHit|gi|82176771|sp|Q7ZYA2.1|TAF8_XENLA
7245	1129	C	A	Locus_24789.0|BlastHit|gi|18202518|sp|Q23983.1|SNAP_DROME
7246	1741	C	T	Locus_24789.0|BlastHit|gi|18202518|sp|Q23983.1|SNAP_DROME
7249	1194	A	T	Locus_24793.0|BlastHit|gi|37079587|sp|O65154.1|KIWI_ARATH
7249	1354	T	C	Locus_24793.0|BlastHit|gi|37079587|sp|O65154.1|KIWI_ARATH
7249	1355	G	A	Locus_24793.0|BlastHit|gi|37079587|sp|O65154.1|KIWI_ARATH
7264	925	T	C	Locus_24811.0|BlastHit|gi|74750895|sp|Q8N1G4.1|LRC47_HUMAN
7267	801	G	A	Locus_24823.0|BlastHit|gi|122102809|sp|Q7K0F0.1|CC130_DROME
7281	824	C	T	Locus_24851.0|BlastHit|gi|78100736|sp|Q6BEA2.1|PRS27_RAT
7292	209	G	C	Locus_24874.0|BlastHit|gi|62900713|sp|Q9VJQ5.1|NC2B_DROME
7293	1034	C	T	Locus_24877.0|BlastHit|gi|22653679|sp|Q26636.1|CATL_SARPE
7293	1201	T	G	Locus_24877.0|BlastHit|gi|22653679|sp|Q26636.1|CATL_SARPE
7293	1241	A	G	Locus_24877.0|BlastHit|gi|22653679|sp|Q26636.1|CATL_SARPE
7293	1319	A	G	Locus_24877.0|BlastHit|gi|22653679|sp|Q26636.1|CATL_SARPE
7293	1448	A	G	Locus_24877.0|BlastHit|gi|22653679|sp|Q26636.1|CATL_SARPE
7300	195	A	C	Locus_24896.0|BlastHit|gi|7676152|sp|P12310.2|DHG_BACSU
7300	486	G	C	Locus_24896.0|BlastHit|gi|7676152|sp|P12310.2|DHG_BACSU
7303	1906	T	C	Locus_24912.0|BlastHit|gi|74869864|sp|Q9VM71.2|XRN2_DROME
7312	389	G	T,A	Locus_24931.0|BlastHit|gi|123790899|sp|Q3U4H6.1|HEXDC_MOUSE
7322	2308	C	T	Locus_24953.0|BlastHit|gi|38258607|sp|Q8IH24.2|MED31_DROME
7349	1899	A	G	Locus_24981.0|BlastHit|gi|13629600|sp|Q9Y2U8.2|MAN1_HUMAN
7349	1948	C	G	Locus_24981.0|BlastHit|gi|13629600|sp|Q9Y2U8.2|MAN1_HUMAN
7351	667	C	T	Locus_24982.1|BlastHit|gi|232285|sp|P08108.2|HSP70_ONCMY
7377	3170	C	T	Locus_25002.0|BlastHit|gi|93141237|sp|P53569.2|CEBPZ_MOUSE
7378	255	C	T	Locus_25003.0|BlastHit|gi|2842718|sp|Q93113.1|GST1D_ANOGA
7378	474	G	A	Locus_25003.0|BlastHit|gi|2842718|sp|Q93113.1|GST1D_ANOGA
7378	847	G	C	Locus_25003.0|BlastHit|gi|2842718|sp|Q93113.1|GST1D_ANOGA
7390	249	G	A	Locus_25016.0|BlastHit|gi|25090912|sp|P82596.3|PLC_HALLA
7409	509	A	G	Locus_25044.0|BlastHit|gi|75041134|sp|Q5R5N4.1|MTL14_PONAB
7409	566	G	A	Locus_25044.0|BlastHit|gi|75041134|sp|Q5R5N4.1|MTL14_PONAB
7411	2701	A	T	Locus_25046.0|BlastHit|gi|341940993|sp|Q9Z2L6.3|MINP1_MOUSE
7461	1555	G	C	Locus_25069.0|BlastHit|gi|73621844|sp|Q9DBE9.1|RRMJ3_MOUSE
7504	906	T	C	Locus_25118.0|BlastHit|gi|74870900|sp|Q9VTU0.1|KRI1_DROME
7505	374	T	C	Locus_25120.0|BlastHit|gi|109917954|sp|Q2M2S8.1|ALKB7_BOVIN
7505	923	C	T	Locus_25120.0|BlastHit|gi|109917954|sp|Q2M2S8.1|ALKB7_BOVIN
7506	106	A	G	Locus_25122.0|BlastHit|gi|46576203|sp|Q9GLN5.1|BIRC5_PIG
7506	403	C	T	Locus_25122.0|BlastHit|gi|46576203|sp|Q9GLN5.1|BIRC5_PIG
7542	267	A	G	Locus_25143.0|BlastHit|gi|82182030|sp|Q6AZN4.1|RM15_XENLA
7542	357	A	T	Locus_25143.0|BlastHit|gi|82182030|sp|Q6AZN4.1|RM15_XENLA
7542	373	C	T	Locus_25143.0|BlastHit|gi|82182030|sp|Q6AZN4.1|RM15_XENLA
7542	57	C	G	Locus_25143.0|BlastHit|gi|82182030|sp|Q6AZN4.1|RM15_XENLA
7542	58	C	T	Locus_25143.0|BlastHit|gi|82182030|sp|Q6AZN4.1|RM15_XENLA
7550	5170	T	C	Locus_25161.0|BlastHit|gi|322518375|sp|E1C231.1|LTN1_CHICK
7555	2975	G	T	Locus_25169.0|BlastHit|gi|81175190|sp|P40797.2|PNUT_DROME
7556	1352	A	G	Locus_25170.0|BlastHit|gi|73620960|sp|Q24324.2|DSOR1_DROME
7556	2268	C	T	Locus_25170.0|BlastHit|gi|73620960|sp|Q24324.2|DSOR1_DROME
7556	811	T	C	Locus_25170.0|BlastHit|gi|73620960|sp|Q24324.2|DSOR1_DROME
7557	421	T	C	Locus_25172.0|BlastHit|gi|30580379|sp|Q9NP79.1|VTA1_HUMAN
7572	830	A	G	Locus_25193.0|BlastHit|gi|10720057|sp|Q9VAS7.1|INX3_DROME
7576	2128	G	A	Locus_25200.0|BlastHit|gi|187471142|sp|A7RT29.1|HBXIP_NEMVE
7577	58	A	G	Locus_25204.0|BlastHit|gi|23396477|sp|O95563.1|BR44_HUMAN
7577	88	T	G	Locus_25204.0|BlastHit|gi|23396477|sp|O95563.1|BR44_HUMAN
7581	293	T	C	Locus_25215.0|BlastHit|gi|82178178|sp|Q567Z6.1|CRIPT_DANRE
7581	704	T	C	Locus_25215.0|BlastHit|gi|82178178|sp|Q567Z6.1|CRIPT_DANRE
7581	911	G	A	Locus_25215.0|BlastHit|gi|82178178|sp|Q567Z6.1|CRIPT_DANRE
7583	174	T	C	Locus_25219.0|BlastHit|gi|30316295|sp|Q9PLI5.2|Y114_CHLMU
7586	965	T	G	Locus_25222.0|BlastHit|gi|182649418|sp|A7RX26.1|HUTI_NEMVE
7607	1049	A	G	Locus_25253.0|BlastHit|gi|81900425|sp|Q8CHP8.1|PGP_MOUSE
7619	420	A	G	Locus_25270.0|BlastHit|gi|27923994|sp|Q9VUJ0.2|RM39_DROME
7619	591	A	G	Locus_25270.0|BlastHit|gi|27923994|sp|Q9VUJ0.2|RM39_DROME
7619	987	T	C	Locus_25270.0|BlastHit|gi|27923994|sp|Q9VUJ0.2|RM39_DROME
7627	4317	C	A	Locus_25291.0|BlastHit|gi|17365948|sp|P58365.1|CAD23_RAT
7630	694	T	C	Locus_25295.0|BlastHit|gi|123905166|sp|Q6P0I8.2|EXOS6_DANRE
7635	686	C	G	Locus_25301.0|BlastHit|gi|122056017|sp|Q3SZZ0.1|BRX1_BOVIN
7635	896	A	G	Locus_25301.0|BlastHit|gi|122056017|sp|Q3SZZ0.1|BRX1_BOVIN
7647	598	A	T	Locus_25316.0|BlastHit|gi|121993358|sp|Q29GB8.1|NAAT1_DROPS
7649	1082	C	T	Locus_25319.0|BlastHit|gi|1709799|sp|P54814.1|PRS8_MANSE
7649	746	G	A	Locus_25319.0|BlastHit|gi|1709799|sp|P54814.1|PRS8_MANSE
7649	761	C	T	Locus_25319.0|BlastHit|gi|1709799|sp|P54814.1|PRS8_MANSE
7649	773	C	T	Locus_25319.0|BlastHit|gi|1709799|sp|P54814.1|PRS8_MANSE
7649	797	T	C	Locus_25319.0|BlastHit|gi|1709799|sp|P54814.1|PRS8_MANSE
7649	884	T	C	Locus_25319.0|BlastHit|gi|1709799|sp|P54814.1|PRS8_MANSE
7651	494	T	C	Locus_25321.0|BlastHit|gi|75075675|sp|Q4R4E1.1|PIGM_MACFA
7651	555	T	A	Locus_25321.0|BlastHit|gi|75075675|sp|Q4R4E1.1|PIGM_MACFA
7667	510	G	A	Locus_25343.0|BlastHit|gi|34395915|sp|Q9VBV3.1|TAKT_DROME
7667	735	T	C	Locus_25343.0|BlastHit|gi|34395915|sp|Q9VBV3.1|TAKT_DROME
7669	311	C	T	Locus_25346.0|BlastHit|gi|17368331|sp|P82968.1|MCPI_MELCP
7669	68	C	T	Locus_25346.0|BlastHit|gi|17368331|sp|P82968.1|MCPI_MELCP
7669	73	C	A	Locus_25346.0|BlastHit|gi|17368331|sp|P82968.1|MCPI_MELCP
7669	99	A	G	Locus_25346.0|BlastHit|gi|17368331|sp|P82968.1|MCPI_MELCP
7670	268	G	C	Locus_25348.0|BlastHit|gi|24212202|sp|Q9Y3D5.1|RT18C_HUMAN
7670	463	G	A	Locus_25348.0|BlastHit|gi|24212202|sp|Q9Y3D5.1|RT18C_HUMAN
7670	525	T	A	Locus_25348.0|BlastHit|gi|24212202|sp|Q9Y3D5.1|RT18C_HUMAN
7671	647	G	A	Locus_25349.0|BlastHit|gi|1706870|sp|P30043.3|BLVRB_HUMAN
7671	664	G	A	Locus_25349.0|BlastHit|gi|1706870|sp|P30043.3|BLVRB_HUMAN
7671	731	C	T	Locus_25349.0|BlastHit|gi|1706870|sp|P30043.3|BLVRB_HUMAN
7671	879	G	A	Locus_25349.0|BlastHit|gi|1706870|sp|P30043.3|BLVRB_HUMAN
7672	1242	C	T	Locus_25350.0|BlastHit|gi|32363159|sp|Q99L13.1|3HIDH_MOUSE
7674	1350	G	A	Locus_25354.0|BlastHit|gi|82225271|sp|Q9YGD2.1|SUCA_COLLI
7674	1413	A	G	Locus_25354.0|BlastHit|gi|82225271|sp|Q9YGD2.1|SUCA_COLLI
7674	1530	G	A	Locus_25354.0|BlastHit|gi|82225271|sp|Q9YGD2.1|SUCA_COLLI
7674	286	T	A	Locus_25354.0|BlastHit|gi|82225271|sp|Q9YGD2.1|SUCA_COLLI
7674	573	C	T	Locus_25354.0|BlastHit|gi|82225271|sp|Q9YGD2.1|SUCA_COLLI
7684	731	T	C	Locus_25373.0|BlastHit|gi|1352723|sp|P49024.1|PAXI_CHICK
7685	2052	C	G	Locus_25373.0|BlastHit|gi|1352723|sp|P49024.1|PAXI_CHICK
7693	2170	T	G	Locus_25384.1|BlastHit|gi|239977639|sp|A4QNN3.1|UBP30_XENTR
7701	1177	G	A	Locus_25398.0|BlastHit|gi|187608833|sp|Q99MD6.2|TRXR3_MOUSE
7701	2307	A	G	Locus_25398.0|BlastHit|gi|187608833|sp|Q99MD6.2|TRXR3_MOUSE
7701	2783	T	C	Locus_25398.0|BlastHit|gi|187608833|sp|Q99MD6.2|TRXR3_MOUSE
7703	2396	A	T	Locus_25400.0|BlastHit|gi|1350593|sp|P48148.1|RHO1_DROME
7703	2747	G	A	Locus_25400.0|BlastHit|gi|1350593|sp|P48148.1|RHO1_DROME
7703	2964	C	T	Locus_25400.0|BlastHit|gi|1350593|sp|P48148.1|RHO1_DROME
7703	671	C	T	Locus_25400.0|BlastHit|gi|1350593|sp|P48148.1|RHO1_DROME
7719	380	T	C	Locus_25413.0|BlastHit|gi|71153351|sp|Q5F359.1|TPPC5_CHICK
7719	632	T	G	Locus_25413.0|BlastHit|gi|71153351|sp|Q5F359.1|TPPC5_CHICK
7719	737	G	A	Locus_25413.0|BlastHit|gi|71153351|sp|Q5F359.1|TPPC5_CHICK
7719	816	G	T	Locus_25413.0|BlastHit|gi|71153351|sp|Q5F359.1|TPPC5_CHICK
7719	886	G	T	Locus_25413.0|BlastHit|gi|71153351|sp|Q5F359.1|TPPC5_CHICK
7722	750	T	C	Locus_25418.0|BlastHit|gi|74870877|sp|Q9VTJ8.2|TIM14_DROME
7722	805	T	C	Locus_25418.0|BlastHit|gi|74870877|sp|Q9VTJ8.2|TIM14_DROME
7722	837	A	G	Locus_25418.0|BlastHit|gi|74870877|sp|Q9VTJ8.2|TIM14_DROME
7722	987	G	A	Locus_25418.0|BlastHit|gi|74870877|sp|Q9VTJ8.2|TIM14_DROME
7723	120	G	A	Locus_25419.0|BlastHit|gi|81901321|sp|Q8QZZ7.1|TPRKB_MOUSE
7723	224	T	C	Locus_25419.0|BlastHit|gi|81901321|sp|Q8QZZ7.1|TPRKB_MOUSE
7723	231	C	G	Locus_25419.0|BlastHit|gi|81901321|sp|Q8QZZ7.1|TPRKB_MOUSE
7723	261	G	A	Locus_25419.0|BlastHit|gi|81901321|sp|Q8QZZ7.1|TPRKB_MOUSE
7723	546	A	G	Locus_25419.0|BlastHit|gi|81901321|sp|Q8QZZ7.1|TPRKB_MOUSE
7723	555	C	A	Locus_25419.0|BlastHit|gi|81901321|sp|Q8QZZ7.1|TPRKB_MOUSE
7748	2150	A	C	Locus_25433.1|BlastHit|gi|19863257|sp|Q13616.2|CUL1_HUMAN
7748	2255	G	A	Locus_25433.1|BlastHit|gi|19863257|sp|Q13616.2|CUL1_HUMAN
7753	848	A	G	Locus_25436.0|BlastHit|gi|81905342|sp|Q9D5L7.1|SPSB1_MOUSE
7753	851	G	A	Locus_25436.0|BlastHit|gi|81905342|sp|Q9D5L7.1|SPSB1_MOUSE
7755	478	A	G	Locus_25439.0|BlastHit|gi|74811717|sp|Q7Z0Q2.1|RNKB_CERCA
7784	1356	A	T	Locus_25489.0|BlastHit|gi|182676462|sp|A9UMS3.1|PHB2_XENTR
7784	342	T	G	Locus_25489.0|BlastHit|gi|182676462|sp|A9UMS3.1|PHB2_XENTR
7784	786	T	C	Locus_25489.0|BlastHit|gi|182676462|sp|A9UMS3.1|PHB2_XENTR
7787	1390	A	G	Locus_25494.0|BlastHit|gi|125950361|sp|Q86U28.2|ISCA2_HUMAN
7787	627	G	A	Locus_25494.0|BlastHit|gi|125950361|sp|Q86U28.2|ISCA2_HUMAN
7787	776	G	C	Locus_25494.0|BlastHit|gi|125950361|sp|Q86U28.2|ISCA2_HUMAN
7787	790	A	G	Locus_25494.0|BlastHit|gi|125950361|sp|Q86U28.2|ISCA2_HUMAN
7787	911	C	T	Locus_25494.0|BlastHit|gi|125950361|sp|Q86U28.2|ISCA2_HUMAN
7787	982	T	C	Locus_25494.0|BlastHit|gi|125950361|sp|Q86U28.2|ISCA2_HUMAN
7807	2701	T	C	Locus_25505.0|BlastHit|gi|81883392|sp|Q5RKH6.1|OS9_RAT
7811	188	T	C	Locus_25519.0|BlastHit|gi|338817662|sp|C0KJQ4.2|ALPS_PORTR
7811	201	G	A	Locus_25519.0|BlastHit|gi|338817662|sp|C0KJQ4.2|ALPS_PORTR
7811	455	G	A	Locus_25519.0|BlastHit|gi|338817662|sp|C0KJQ4.2|ALPS_PORTR
7853	1534	A	C	Locus_25543.0|BlastHit|gi|45644943|sp|P08761.2|MSRA_DROME
7853	2045	C	T	Locus_25543.0|BlastHit|gi|45644943|sp|P08761.2|MSRA_DROME
7853	2400	A	G	Locus_25543.0|BlastHit|gi|45644943|sp|P08761.2|MSRA_DROME
7853	379	C	T	Locus_25543.0|BlastHit|gi|45644943|sp|P08761.2|MSRA_DROME
7853	569	C	A	Locus_25543.0|BlastHit|gi|45644943|sp|P08761.2|MSRA_DROME
7853	640	G	A	Locus_25543.0|BlastHit|gi|45644943|sp|P08761.2|MSRA_DROME
7869	520	G	A	Locus_25551.0|BlastHit|gi|82237168|sp|Q6NTR1.1|MTL13_XENLA
7870	1505	C	G	Locus_25552.0|BlastHit|gi|17369766|sp|Q9VCA9.1|SPCS3_DROME
7870	378	G	C	Locus_25552.0|BlastHit|gi|17369766|sp|Q9VCA9.1|SPCS3_DROME
7870	509	T	C	Locus_25552.0|BlastHit|gi|17369766|sp|Q9VCA9.1|SPCS3_DROME
7870	542	A	G,C	Locus_25552.0|BlastHit|gi|17369766|sp|Q9VCA9.1|SPCS3_DROME
7870	808	G	A	Locus_25552.0|BlastHit|gi|17369766|sp|Q9VCA9.1|SPCS3_DROME
7876	2991	G	A	Locus_25562.0|BlastHit|gi|81900078|sp|Q8CEF1.1|FEM1C_MOUSE
7876	760	G	A	Locus_25562.0|BlastHit|gi|81900078|sp|Q8CEF1.1|FEM1C_MOUSE
7880	1118	C	T	Locus_25571.0|BlastHit|gi|91208328|sp|Q3T904.1|ATG9A_BOVIN
7880	1184	G	A	Locus_25571.0|BlastHit|gi|91208328|sp|Q3T904.1|ATG9A_BOVIN
7880	1187	T	C	Locus_25571.0|BlastHit|gi|91208328|sp|Q3T904.1|ATG9A_BOVIN
7880	406	C	A	Locus_25571.0|BlastHit|gi|91208328|sp|Q3T904.1|ATG9A_BOVIN
7883	533	A	C	Locus_25575.0|BlastHit|gi|48428688|sp|Q9NRA2.2|S17A5_HUMAN
7883	997	G	A	Locus_25575.0|BlastHit|gi|48428688|sp|Q9NRA2.2|S17A5_HUMAN
7886	1637	G	A	Locus_25577.1|BlastHit|gi|48428484|sp|Q9BXM7.1|PINK1_HUMAN
7886	392	G	A	Locus_25577.1|BlastHit|gi|48428484|sp|Q9BXM7.1|PINK1_HUMAN
7886	745	G	A	Locus_25577.1|BlastHit|gi|48428484|sp|Q9BXM7.1|PINK1_HUMAN
7888	167	A	G	Locus_25583.0|BlastHit|gi|1174432|sp|P41689.1|SPYA_FELCA
7888	173	T	C	Locus_25583.0|BlastHit|gi|1174432|sp|P41689.1|SPYA_FELCA
7888	319	T	C	Locus_25583.0|BlastHit|gi|1174432|sp|P41689.1|SPYA_FELCA
7892	790	C	T	Locus_25595.0|BlastHit|gi|67460968|sp|Q9CYK2.2|QPCT_MOUSE
7892	850	G	A	Locus_25595.0|BlastHit|gi|67460968|sp|Q9CYK2.2|QPCT_MOUSE
7927	2428	T	C	Locus_25616.0|BlastHit|gi|1171772|sp|P46461.1|NSF1_DROME
7928	1050	T	C	Locus_25620.0|BlastHit|gi|73917780|sp|Q6PBQ2.1|CHMP7_DANRE
7928	873	A	T	Locus_25620.0|BlastHit|gi|73917780|sp|Q6PBQ2.1|CHMP7_DANRE
7941	1411	A	C	Locus_25637.0|BlastHit|gi|25453309|sp|Q8MQI6.1|ELOF1_DROME
7941	1563	A	G	Locus_25637.0|BlastHit|gi|25453309|sp|Q8MQI6.1|ELOF1_DROME
7942	637	C	T	Locus_25638.0|BlastHit|gi|62900285|sp|Q8BH95.1|ECHM_MOUSE
7955	610	A	G	Locus_25642.0|BlastHit|gi|115866|sp|P19222.1|CBPA2_RAT
7967	154	T	C	Locus_25658.0|BlastHit|gi|2493263|sp|Q27433.1|MEC2_CAEEL
7968	227	G	A	Locus_25660.0|BlastHit|gi|82082907|sp|Q5ZMB2.1|HEBP1_CHICK
7968	329	A	G	Locus_25660.0|BlastHit|gi|82082907|sp|Q5ZMB2.1|HEBP1_CHICK
7968	731	G	T	Locus_25660.0|BlastHit|gi|82082907|sp|Q5ZMB2.1|HEBP1_CHICK
7976	182	C	T	Locus_25670.0|BlastHit|gi|17380252|sp|P70195.1|PSB7_MOUSE
7976	280	G	A	Locus_25670.0|BlastHit|gi|17380252|sp|P70195.1|PSB7_MOUSE
7976	954	C	T	Locus_25670.0|BlastHit|gi|17380252|sp|P70195.1|PSB7_MOUSE
7978	1057	A	G	Locus_25673.0|BlastHit|gi|20137699|sp|O70152.1|DPM1_MOUSE
7996	1066	A	G	Locus_25689.0|BlastHit|gi|32172424|sp|P11584.3|ITBX_DROME
8010	136	A	G	Locus_25702.0|BlastHit|gi|10720056|sp|Q9V427.1|INX2_DROME
8028	2070	G	A	Locus_25708.0|BlastHit|gi|46397879|sp|Q99615.2|DNJC7_HUMAN
8031	2781	T	C	Locus_25712.0|BlastHit|gi|59803097|sp|Q00537.2|CDK17_HUMAN
8031	4365	A	T	Locus_25712.0|BlastHit|gi|59803097|sp|Q00537.2|CDK17_HUMAN
8038	162	T	C	Locus_25720.0|BlastHit|gi|74733325|sp|Q9BVG4.1|CX026_HUMAN
8038	354	G	A	Locus_25720.0|BlastHit|gi|74733325|sp|Q9BVG4.1|CX026_HUMAN
8038	362	A	G	Locus_25720.0|BlastHit|gi|74733325|sp|Q9BVG4.1|CX026_HUMAN
8038	666	A	G	Locus_25720.0|BlastHit|gi|74733325|sp|Q9BVG4.1|CX026_HUMAN
8038	870	G	A	Locus_25720.0|BlastHit|gi|74733325|sp|Q9BVG4.1|CX026_HUMAN
8040	233	A	G	Locus_25722.0|BlastHit|gi|78099970|sp|Q8T4J9.1|CU27_MANSE
8040	236	G	A	Locus_25722.0|BlastHit|gi|78099970|sp|Q8T4J9.1|CU27_MANSE
8042	412	G	A	Locus_25724.0|BlastHit|gi|21264423|sp|P21266.3|GSTM3_HUMAN
8042	577	T	C	Locus_25724.0|BlastHit|gi|21264423|sp|P21266.3|GSTM3_HUMAN
8042	784	G	C	Locus_25724.0|BlastHit|gi|21264423|sp|P21266.3|GSTM3_HUMAN
8047	226	C	T	Locus_25735.0|BlastHit|gi|74734693|sp|Q9NXE8.1|CWC25_HUMAN
8047	579	G	A	Locus_25735.0|BlastHit|gi|74734693|sp|Q9NXE8.1|CWC25_HUMAN
8047	889	C	G	Locus_25735.0|BlastHit|gi|74734693|sp|Q9NXE8.1|CWC25_HUMAN
8060	1075	G	A	Locus_25752.0|BlastHit|gi|81541067|sp|Q9I234.1|KYNB_PSEAE
8060	545	A	G	Locus_25752.0|BlastHit|gi|81541067|sp|Q9I234.1|KYNB_PSEAE
8065	123	G	A	Locus_25760.0|BlastHit|gi|75027647|sp|Q9VWU1.1|PSH_DROME
8068	2296	C	T	Locus_25764.0|BlastHit|gi|123900395|sp|Q3KPV4.1|TMUB1_XENLA
8068	2552	A	T	Locus_25764.0|BlastHit|gi|123900395|sp|Q3KPV4.1|TMUB1_XENLA
8068	773	G	T	Locus_25764.0|BlastHit|gi|123900395|sp|Q3KPV4.1|TMUB1_XENLA
8076	1037	G	A	Locus_25782.0|BlastHit|gi|136032|sp|P06708.1|TNNC2_PONLE
8076	1066	A	G	Locus_25782.0|BlastHit|gi|136032|sp|P06708.1|TNNC2_PONLE
8076	1343	A	T	Locus_25782.0|BlastHit|gi|136032|sp|P06708.1|TNNC2_PONLE
8080	255	G	A	Locus_25785.0|BlastHit|gi|74866395|sp|Q94521.1|DNAT_DROME
8080	62	C	T	Locus_25785.0|BlastHit|gi|74866395|sp|Q94521.1|DNAT_DROME
8096	1801	C	T	Locus_25809.0|BlastHit|gi|62296810|sp|Q63081.2|PDIA6_RAT
8096	854	C	T	Locus_25809.0|BlastHit|gi|62296810|sp|Q63081.2|PDIA6_RAT
8097	449	C	G	Locus_25810.0|BlastHit|gi|29428061|sp|Q9V7S5.1|PICO_DROME
8097	521	C	G	Locus_25810.0|BlastHit|gi|29428061|sp|Q9V7S5.1|PICO_DROME
8099	378	A	G	Locus_25813.0|BlastHit|gi|9297057|sp|Q9VND8.1|RHEB_DROME
8113	1047	G	A	Locus_25839.0|BlastHit|gi|296439468|sp|Q13620.4|CUL4B_HUMAN
8129	1188	A	G	Locus_25860.0|BlastHit|gi|12229574|sp|Q15389.2|ANGP1_HUMAN
8154	1007	T	C	Locus_25872.0|BlastHit|gi|17369753|sp|Q9V411.1|NOG1_DROME
8154	1016	C	A	Locus_25872.0|BlastHit|gi|17369753|sp|Q9V411.1|NOG1_DROME
8154	1154	T	C	Locus_25872.0|BlastHit|gi|17369753|sp|Q9V411.1|NOG1_DROME
8154	1212	C	A	Locus_25872.0|BlastHit|gi|17369753|sp|Q9V411.1|NOG1_DROME
8154	1322	T	C	Locus_25872.0|BlastHit|gi|17369753|sp|Q9V411.1|NOG1_DROME
8154	1538	C	A	Locus_25872.0|BlastHit|gi|17369753|sp|Q9V411.1|NOG1_DROME
8172	1178	T	A	Locus_25894.2|BlastHit|gi|20455506|sp|Q60715.2|P4HA1_MOUSE
8172	1641	A	T	Locus_25894.2|BlastHit|gi|20455506|sp|Q60715.2|P4HA1_MOUSE
8172	208	C	T	Locus_25894.2|BlastHit|gi|20455506|sp|Q60715.2|P4HA1_MOUSE
8172	445	T	C	Locus_25894.2|BlastHit|gi|20455506|sp|Q60715.2|P4HA1_MOUSE
8173	234	G	A	Locus_25895.0|BlastHit|gi|25090702|sp|O46040.3|MSTAA_DROME
8175	150	T	C	Locus_25900.0|BlastHit|gi|115311242|sp|Q5YW75.1|ECTD_NOCFA
8180	1627	T	C	Locus_25916.0|BlastHit|gi|322967577|sp|Q32N92.2|PATL1_XENLA
8180	1805	C	T	Locus_25916.0|BlastHit|gi|322967577|sp|Q32N92.2|PATL1_XENLA
8180	1957	G	A	Locus_25916.0|BlastHit|gi|322967577|sp|Q32N92.2|PATL1_XENLA
8180	640	T	C	Locus_25916.0|BlastHit|gi|322967577|sp|Q32N92.2|PATL1_XENLA
8180	787	G	T	Locus_25916.0|BlastHit|gi|322967577|sp|Q32N92.2|PATL1_XENLA
8180	959	C	A	Locus_25916.0|BlastHit|gi|322967577|sp|Q32N92.2|PATL1_XENLA
8185	419	T	C	Locus_25922.0|BlastHit|gi|5921940|sp|P81580.1|CUPC1_CANPG
8185	426	T	C	Locus_25922.0|BlastHit|gi|5921940|sp|P81580.1|CUPC1_CANPG
8193	1047	T	C	Locus_25932.0|BlastHit|gi|110808226|sp|Q29S14.1|F18B1_BOVIN
8193	1164	T	C	Locus_25932.0|BlastHit|gi|110808226|sp|Q29S14.1|F18B1_BOVIN
8193	1517	T	C	Locus_25932.0|BlastHit|gi|110808226|sp|Q29S14.1|F18B1_BOVIN
8193	482	C	G	Locus_25932.0|BlastHit|gi|110808226|sp|Q29S14.1|F18B1_BOVIN
8193	554	C	T	Locus_25932.0|BlastHit|gi|110808226|sp|Q29S14.1|F18B1_BOVIN
8193	712	C	T	Locus_25932.0|BlastHit|gi|110808226|sp|Q29S14.1|F18B1_BOVIN
8196	1686	G	A	Locus_25934.0|BlastHit|gi|25090702|sp|O46040.3|MSTAA_DROME
8196	357	C	A	Locus_25934.0|BlastHit|gi|25090702|sp|O46040.3|MSTAA_DROME
8196	390	T	A	Locus_25934.0|BlastHit|gi|25090702|sp|O46040.3|MSTAA_DROME
8210	324	C	A	Locus_25947.0|BlastHit|gi|123893574|sp|Q29R99.1|LIPT2_DANRE
8211	155	G	T	Locus_25948.0|BlastHit|gi|2497498|sp|Q16774.2|KGUA_HUMAN
8221	1316	T	C	Locus_25961.0|BlastHit|gi|205831220|sp|A2VDQ7.1|ZN420_BOVIN
8241	1021	T	A	Locus_25971.0|BlastHit|gi|75076029|sp|Q4R5G7.1|DHB12_MACFA
8241	124	C	G	Locus_25971.0|BlastHit|gi|75076029|sp|Q4R5G7.1|DHB12_MACFA
8241	266	A	G	Locus_25971.0|BlastHit|gi|75076029|sp|Q4R5G7.1|DHB12_MACFA
8241	511	T	C	Locus_25971.0|BlastHit|gi|75076029|sp|Q4R5G7.1|DHB12_MACFA
8241	606	T	C	Locus_25971.0|BlastHit|gi|75076029|sp|Q4R5G7.1|DHB12_MACFA
8241	667	A	G	Locus_25971.0|BlastHit|gi|75076029|sp|Q4R5G7.1|DHB12_MACFA
8244	299	T	C	Locus_25976.0|BlastHit|gi|75052246|sp|O46640.1|ST3A1_RABIT
8293	721	C	T	Locus_26016.0|BlastHit|gi|17367081|sp|Q9SF85.1|ADK1_ARATH
8297	2275	A	T	Locus_26020.0|BlastHit|gi|257096251|sp|B0W3L6.1|CARM1_CULQU
8304	1213	C	T	Locus_26023.0|BlastHit|gi|38503351|sp|Q8N1M1.1|BEST3_HUMAN
8304	1756	G	A	Locus_26023.0|BlastHit|gi|38503351|sp|Q8N1M1.1|BEST3_HUMAN
8304	1990	T	C	Locus_26023.0|BlastHit|gi|38503351|sp|Q8N1M1.1|BEST3_HUMAN
8304	521	G	C	Locus_26023.0|BlastHit|gi|38503351|sp|Q8N1M1.1|BEST3_HUMAN
8350	600	G	A	Locus_26062.0|BlastHit|gi|1706299|sp|P51398.1|RT29_HUMAN
8350	696	T	C	Locus_26062.0|BlastHit|gi|1706299|sp|P51398.1|RT29_HUMAN
8350	783	G	A	Locus_26062.0|BlastHit|gi|1706299|sp|P51398.1|RT29_HUMAN
8362	1426	C	T,G	Locus_26067.0|BlastHit|gi|129688|sp|P21902.1|PCE_TACTR
8362	1450	G	T	Locus_26067.0|BlastHit|gi|129688|sp|P21902.1|PCE_TACTR
8364	2552	G	A	Locus_26072.0|BlastHit|gi|14424439|sp|P12024.2|CHAO_DROME
8364	2741	T	C	Locus_26072.0|BlastHit|gi|14424439|sp|P12024.2|CHAO_DROME
8364	2924	C	G	Locus_26072.0|BlastHit|gi|14424439|sp|P12024.2|CHAO_DROME
8364	3315	T	C	Locus_26072.0|BlastHit|gi|14424439|sp|P12024.2|CHAO_DROME
8364	3467	G	C	Locus_26072.0|BlastHit|gi|14424439|sp|P12024.2|CHAO_DROME
8367	1061	C	T	Locus_26085.0|BlastHit|gi|3041732|sp|P09671.3|SODM_MOUSE
8367	1122	A	T	Locus_26085.0|BlastHit|gi|3041732|sp|P09671.3|SODM_MOUSE
8367	590	G	A	Locus_26085.0|BlastHit|gi|3041732|sp|P09671.3|SODM_MOUSE
8367	977	C	T	Locus_26085.0|BlastHit|gi|3041732|sp|P09671.3|SODM_MOUSE
8374	308	T	C	Locus_26091.0|BlastHit|gi|141663|sp|P18737.1|ZG8_XENLA
8375	408	A	G	Locus_26093.0|BlastHit|gi|66774003|sp|Q7TNC8.1|GLRA2_MOUSE
8375	491	G	A	Locus_26093.0|BlastHit|gi|66774003|sp|Q7TNC8.1|GLRA2_MOUSE
8375	611	T	C	Locus_26093.0|BlastHit|gi|66774003|sp|Q7TNC8.1|GLRA2_MOUSE
8375	649	G	A	Locus_26093.0|BlastHit|gi|66774003|sp|Q7TNC8.1|GLRA2_MOUSE
8376	251	A	G	Locus_26094.0|BlastHit|gi|75013065|sp|Q7Z269.1|SP4_POLDO
8376	279	T	C	Locus_26094.0|BlastHit|gi|75013065|sp|Q7Z269.1|SP4_POLDO
8376	518	T	C	Locus_26094.0|BlastHit|gi|75013065|sp|Q7Z269.1|SP4_POLDO
8380	293	C	T	Locus_26101.0|BlastHit|gi|224471853|sp|Q2M146.2|ST7_DROPS
8386	596	T	C	Locus_26112.0|BlastHit|gi|290463172|sp|B4HZ81.1|CISD2_DROSE
8386	672	C	G	Locus_26112.0|BlastHit|gi|290463172|sp|B4HZ81.1|CISD2_DROSE
8386	745	T	A	Locus_26112.0|BlastHit|gi|290463172|sp|B4HZ81.1|CISD2_DROSE
8387	1329	G	A	Locus_26113.0|BlastHit|gi|50402181|sp|Q7T2P6.1|TIM23_DANRE
8389	1017	C	T	Locus_26121.0|BlastHit|gi|17865553|sp|Q99N95.1|RM03_MOUSE
8389	642	A	C	Locus_26121.0|BlastHit|gi|17865553|sp|Q99N95.1|RM03_MOUSE
8389	660	T	C	Locus_26121.0|BlastHit|gi|17865553|sp|Q99N95.1|RM03_MOUSE
8389	747	T	C	Locus_26121.0|BlastHit|gi|17865553|sp|Q99N95.1|RM03_MOUSE
8389	756	T	C	Locus_26121.0|BlastHit|gi|17865553|sp|Q99N95.1|RM03_MOUSE
8389	828	C	T	Locus_26121.0|BlastHit|gi|17865553|sp|Q99N95.1|RM03_MOUSE
8393	887	T	C	Locus_26128.0|BlastHit|gi|73921524|sp|Q5T2D3.1|OTUD3_HUMAN
8411	625	A	G	Locus_26134.0|BlastHit|gi|110825729|sp|P05661.4|MYSA_DROME
8412	292	T	C	Locus_26134.0|BlastHit|gi|110825729|sp|P05661.4|MYSA_DROME
8422	3168	G	A	Locus_26146.0|BlastHit|gi|143811452|sp|Q13905.3|RPGF1_HUMAN
8422	4317	G	T	Locus_26146.0|BlastHit|gi|143811452|sp|Q13905.3|RPGF1_HUMAN
8422	776	T	A	Locus_26146.0|BlastHit|gi|143811452|sp|Q13905.3|RPGF1_HUMAN
8439	3134	G	A	Locus_26164.1|BlastHit|gi|73621175|sp|Q52KR2.1|LRIG2_MOUSE
8445	936	C	T	Locus_26170.0|BlastHit|gi|48427955|sp|P61799.1|APTX_DANRE
8460	192	C	A	Locus_26191.0|BlastHit|gi|122064577|sp|P81926.2|SODC_HALRO
8460	249	G	A	Locus_26191.0|BlastHit|gi|122064577|sp|P81926.2|SODC_HALRO
8460	384	T	C	Locus_26191.0|BlastHit|gi|122064577|sp|P81926.2|SODC_HALRO
8461	328	C	T	Locus_26193.0|BlastHit|gi|223590061|sp|Q29IK4.2|RM22_DROPS
8474	1395	C	G,A	Locus_26205.0|BlastHit|gi|75009676|sp|Q7JQ07.1|MOS1T_DROMA
8474	1463	T	A	Locus_26205.0|BlastHit|gi|75009676|sp|Q7JQ07.1|MOS1T_DROMA
8488	223	T	A	Locus_26228.0|BlastHit|gi|31340424|sp|Q8WTC1.2|RT15_DROME
8488	423	T	C	Locus_26228.0|BlastHit|gi|31340424|sp|Q8WTC1.2|RT15_DROME
8489	443	T	C	Locus_26233.0|BlastHit|gi|81904744|sp|Q9D1I6.1|RM14_MOUSE
8489	467	C	T,A	Locus_26233.0|BlastHit|gi|81904744|sp|Q9D1I6.1|RM14_MOUSE
8489	90	A	G	Locus_26233.0|BlastHit|gi|81904744|sp|Q9D1I6.1|RM14_MOUSE
8491	2800	G	T	Locus_26237.0|BlastHit|gi|74734348|sp|Q9NUJ3.1|T11L1_HUMAN
8517	1372	C	T	Locus_26245.0|BlastHit|gi|67461064|sp|Q90744.1|NAGAB_CHICK
8517	306	T	C	Locus_26245.0|BlastHit|gi|67461064|sp|Q90744.1|NAGAB_CHICK
8534	1108	T	A	Locus_26275.0|BlastHit|gi|18203123|sp|Q9JJ80.2|RPF2_MOUSE
8534	87	T	C	Locus_26275.0|BlastHit|gi|18203123|sp|Q9JJ80.2|RPF2_MOUSE
8534	904	A	G	Locus_26275.0|BlastHit|gi|18203123|sp|Q9JJ80.2|RPF2_MOUSE
8534	996	A	G	Locus_26275.0|BlastHit|gi|18203123|sp|Q9JJ80.2|RPF2_MOUSE
8535	1012	C	T	Locus_26278.0|BlastHit|gi|67460545|sp|Q8AWW5.1|CRIM1_CHICK
8539	696	C	A	Locus_26284.0|BlastHit|gi|129330|sp|P23636.1|PP2A2_SCHPO
8539	741	C	G	Locus_26284.0|BlastHit|gi|129330|sp|P23636.1|PP2A2_SCHPO
8540	109	G	A	Locus_26285.0|BlastHit|gi|62901525|sp|Q94900.2|GLUCL_DROME
8541	240	A	C	Locus_26285.1|BlastHit|gi|62901525|sp|Q94900.2|GLUCL_DROME
8541	651	C	T	Locus_26285.1|BlastHit|gi|62901525|sp|Q94900.2|GLUCL_DROME
8555	332	A	G	Locus_26296.0|BlastHit|gi|62510511|sp|Q9D1L0.1|CHCH2_MOUSE
8555	383	C	T	Locus_26296.0|BlastHit|gi|62510511|sp|Q9D1L0.1|CHCH2_MOUSE
8555	605	A	G	Locus_26296.0|BlastHit|gi|62510511|sp|Q9D1L0.1|CHCH2_MOUSE
8555	632	A	C	Locus_26296.0|BlastHit|gi|62510511|sp|Q9D1L0.1|CHCH2_MOUSE
8594	303	A	G	Locus_26319.0|BlastHit|gi|74737109|sp|Q6P161.1|RM54_HUMAN
8594	372	T	A	Locus_26319.0|BlastHit|gi|74737109|sp|Q6P161.1|RM54_HUMAN
8594	399	T	A	Locus_26319.0|BlastHit|gi|74737109|sp|Q6P161.1|RM54_HUMAN
8594	543	C	A	Locus_26319.0|BlastHit|gi|74737109|sp|Q6P161.1|RM54_HUMAN
8596	1402	A	G	Locus_26321.0|BlastHit|gi|74764641|sp|O77457.1|T23O_ANOGA
8596	1414	C	T	Locus_26321.0|BlastHit|gi|74764641|sp|O77457.1|T23O_ANOGA
8596	1471	T	C	Locus_26321.0|BlastHit|gi|74764641|sp|O77457.1|T23O_ANOGA
8596	1636	C	G	Locus_26321.0|BlastHit|gi|74764641|sp|O77457.1|T23O_ANOGA
8596	1831	T	C	Locus_26321.0|BlastHit|gi|74764641|sp|O77457.1|T23O_ANOGA
8596	1915	C	G	Locus_26321.0|BlastHit|gi|74764641|sp|O77457.1|T23O_ANOGA
8604	756	T	A	Locus_26332.0|BlastHit|gi|82188721|sp|Q7ZVX6.1|UBA3_DANRE
8618	153	A	T	Locus_26351.0|BlastHit|gi|23396498|sp|Q96KP4.2|CNDP2_HUMAN
8618	472	C	G	Locus_26351.0|BlastHit|gi|23396498|sp|Q96KP4.2|CNDP2_HUMAN
8618	93	C	T	Locus_26351.0|BlastHit|gi|23396498|sp|Q96KP4.2|CNDP2_HUMAN
8622	89	G	A	Locus_26355.0|BlastHit|gi|48474943|sp|Q99NF1.1|BCDO2_MOUSE
8622	931	G	A	Locus_26355.0|BlastHit|gi|48474943|sp|Q99NF1.1|BCDO2_MOUSE
8642	124	A	C	Locus_26366.0|BlastHit|gi|1730035|sp|Q03958.1|PFD6_MOUSE
8642	361	G	A	Locus_26366.0|BlastHit|gi|1730035|sp|Q03958.1|PFD6_MOUSE
8642	417	G	A	Locus_26366.0|BlastHit|gi|1730035|sp|Q03958.1|PFD6_MOUSE
8642	529	C	T	Locus_26366.0|BlastHit|gi|1730035|sp|Q03958.1|PFD6_MOUSE
8642	559	T	C	Locus_26366.0|BlastHit|gi|1730035|sp|Q03958.1|PFD6_MOUSE
8642	796	G	C	Locus_26366.0|BlastHit|gi|1730035|sp|Q03958.1|PFD6_MOUSE
8645	1282	C	T	Locus_26368.0|BlastHit|gi|75075258|sp|Q4R367.1|UFL1_MACFA
8645	1363	C	T	Locus_26368.0|BlastHit|gi|75075258|sp|Q4R367.1|UFL1_MACFA
8645	901	C	T	Locus_26368.0|BlastHit|gi|75075258|sp|Q4R367.1|UFL1_MACFA
8670	1586	C	A	Locus_26384.0|BlastHit|gi|62510647|sp|Q8HXY0.1|ETFA_MACFA
8670	358	A	G	Locus_26384.0|BlastHit|gi|62510647|sp|Q8HXY0.1|ETFA_MACFA
8677	194	T	A	Locus_26396.0|BlastHit|gi|82182892|sp|Q6DFI2.1|TM147_XENLA
8677	402	A	G	Locus_26396.0|BlastHit|gi|82182892|sp|Q6DFI2.1|TM147_XENLA
8677	511	A	T	Locus_26396.0|BlastHit|gi|82182892|sp|Q6DFI2.1|TM147_XENLA
8682	1035	G	A	Locus_26401.0|BlastHit|gi|24418661|sp|O00471.1|EXOC5_HUMAN
8682	870	G	A	Locus_26401.0|BlastHit|gi|24418661|sp|O00471.1|EXOC5_HUMAN
8685	235	G	A	Locus_26404.0|BlastHit|gi|68565154|sp|Q5ZJH7.1|CNPD1_CHICK
8685	2504	A	G	Locus_26404.0|BlastHit|gi|68565154|sp|Q5ZJH7.1|CNPD1_CHICK
8685	580	A	G	Locus_26404.0|BlastHit|gi|68565154|sp|Q5ZJH7.1|CNPD1_CHICK
8685	79	A	G	Locus_26404.0|BlastHit|gi|68565154|sp|Q5ZJH7.1|CNPD1_CHICK
8685	952	C	A	Locus_26404.0|BlastHit|gi|68565154|sp|Q5ZJH7.1|CNPD1_CHICK
8693	1673	A	G	Locus_26409.0|BlastHit|gi|82185993|sp|Q6NYU7.1|UPP_DANRE
8693	1819	A	G	Locus_26409.0|BlastHit|gi|82185993|sp|Q6NYU7.1|UPP_DANRE
8695	2676	T	A	Locus_26414.0|BlastHit|gi|78099250|sp|Q5ZLF0.1|F10A1_CHICK
8695	2894	A	G	Locus_26414.0|BlastHit|gi|78099250|sp|Q5ZLF0.1|F10A1_CHICK
8695	3107	A	T	Locus_26414.0|BlastHit|gi|78099250|sp|Q5ZLF0.1|F10A1_CHICK
8722	2085	G	A	Locus_26445.0|BlastHit|gi|238689907|sp|B4USW8.1|KATL1_OTOGA
8723	538	A	T	Locus_26447.0|BlastHit|gi|158564000|sp|Q9UHW5.2|GPN3_HUMAN
8723	738	G	A	Locus_26447.0|BlastHit|gi|158564000|sp|Q9UHW5.2|GPN3_HUMAN
8723	775	G	A	Locus_26447.0|BlastHit|gi|158564000|sp|Q9UHW5.2|GPN3_HUMAN
8737	182	T	C	Locus_26468.0|BlastHit|gi|82178883|sp|Q5EAR6.1|CC115_DANRE
8737	751	A	G	Locus_26468.0|BlastHit|gi|82178883|sp|Q5EAR6.1|CC115_DANRE
8737	979	A	T	Locus_26468.0|BlastHit|gi|82178883|sp|Q5EAR6.1|CC115_DANRE
8744	1028	G	C	Locus_26474.0|BlastHit|gi|82237360|sp|Q6NZ13.1|NBL1_DANRE
8744	1066	G	T	Locus_26474.0|BlastHit|gi|82237360|sp|Q6NZ13.1|NBL1_DANRE
8744	1221	A	G	Locus_26474.0|BlastHit|gi|82237360|sp|Q6NZ13.1|NBL1_DANRE
8744	1369	A	C	Locus_26474.0|BlastHit|gi|82237360|sp|Q6NZ13.1|NBL1_DANRE
8744	1373	G	A	Locus_26474.0|BlastHit|gi|82237360|sp|Q6NZ13.1|NBL1_DANRE
8744	1648	T	C	Locus_26474.0|BlastHit|gi|82237360|sp|Q6NZ13.1|NBL1_DANRE
8744	422	C	T	Locus_26474.0|BlastHit|gi|82237360|sp|Q6NZ13.1|NBL1_DANRE
8744	982	C	T	Locus_26474.0|BlastHit|gi|82237360|sp|Q6NZ13.1|NBL1_DANRE
8746	1015	C	T	Locus_26479.1|BlastHit|gi|73920458|sp|Q6NWF4.2|VPS25_DANRE
8746	1095	T	C	Locus_26479.1|BlastHit|gi|73920458|sp|Q6NWF4.2|VPS25_DANRE
8746	1710	T	A	Locus_26479.1|BlastHit|gi|73920458|sp|Q6NWF4.2|VPS25_DANRE
8746	2003	G	A	Locus_26479.1|BlastHit|gi|73920458|sp|Q6NWF4.2|VPS25_DANRE
8746	777	T	C	Locus_26479.1|BlastHit|gi|73920458|sp|Q6NWF4.2|VPS25_DANRE
8746	787	G	A	Locus_26479.1|BlastHit|gi|73920458|sp|Q6NWF4.2|VPS25_DANRE
8746	926	T	A	Locus_26479.1|BlastHit|gi|73920458|sp|Q6NWF4.2|VPS25_DANRE
8748	1194	A	T	Locus_26482.0|BlastHit|gi|73622264|sp|P14576.2|SRP54_MOUSE
8749	617	C	T	Locus_26483.0|BlastHit|gi|88941977|sp|Q2YDF6.1|RT35_BOVIN
8749	900	A	G	Locus_26483.0|BlastHit|gi|88941977|sp|Q2YDF6.1|RT35_BOVIN
8757	973	A	T	Locus_26496.0|BlastHit|gi|8134713|sp|P97355.1|SPSY_MOUSE
8761	1901	G	C	Locus_26501.0|BlastHit|gi|37999493|sp|Q13231.1|CHIT1_HUMAN
8761	1961	A	G	Locus_26501.0|BlastHit|gi|37999493|sp|Q13231.1|CHIT1_HUMAN
8761	554	A	G	Locus_26501.0|BlastHit|gi|37999493|sp|Q13231.1|CHIT1_HUMAN
8761	739	G	T	Locus_26501.0|BlastHit|gi|37999493|sp|Q13231.1|CHIT1_HUMAN
8761	898	T	C	Locus_26501.0|BlastHit|gi|37999493|sp|Q13231.1|CHIT1_HUMAN
8761	917	C	T	Locus_26501.0|BlastHit|gi|37999493|sp|Q13231.1|CHIT1_HUMAN
8768	1166	G	A	Locus_26507.0|BlastHit|gi|21431847|sp|Q15050.2|RRS1_HUMAN
8768	358	G	A	Locus_26507.0|BlastHit|gi|21431847|sp|Q15050.2|RRS1_HUMAN
8783	1080	C	T	Locus_26524.0|BlastHit|gi|68565605|sp|Q96I82.1|KAZD1_HUMAN
8783	978	G	A	Locus_26524.0|BlastHit|gi|68565605|sp|Q96I82.1|KAZD1_HUMAN
8795	171	T	C	Locus_26537.0|BlastHit|gi|152125829|sp|Q5T013.2|HYI_HUMAN
8795	200	A	G	Locus_26537.0|BlastHit|gi|152125829|sp|Q5T013.2|HYI_HUMAN
8795	423	G	A	Locus_26537.0|BlastHit|gi|152125829|sp|Q5T013.2|HYI_HUMAN
8795	486	A	G	Locus_26537.0|BlastHit|gi|152125829|sp|Q5T013.2|HYI_HUMAN
8795	798	T	C	Locus_26537.0|BlastHit|gi|152125829|sp|Q5T013.2|HYI_HUMAN
8795	98	A	T	Locus_26537.0|BlastHit|gi|152125829|sp|Q5T013.2|HYI_HUMAN
8809	1138	C	T	Locus_26546.0|BlastHit|gi|29839593|sp|Q91W90.2|TXND5_MOUSE
8809	150	A	G	Locus_26546.0|BlastHit|gi|29839593|sp|Q91W90.2|TXND5_MOUSE
8809	200	A	G	Locus_26546.0|BlastHit|gi|29839593|sp|Q91W90.2|TXND5_MOUSE
8809	409	C	T	Locus_26546.0|BlastHit|gi|29839593|sp|Q91W90.2|TXND5_MOUSE
8821	1108	C	T	Locus_26560.0|BlastHit|gi|74751821|sp|Q96DW6.1|S2538_HUMAN
8821	1489	T	A	Locus_26560.0|BlastHit|gi|74751821|sp|Q96DW6.1|S2538_HUMAN
8821	2409	T	A	Locus_26560.0|BlastHit|gi|74751821|sp|Q96DW6.1|S2538_HUMAN
8821	2471	C	T	Locus_26560.0|BlastHit|gi|74751821|sp|Q96DW6.1|S2538_HUMAN
8854	1523	A	G	Locus_26571.0|BlastHit|gi|2497623|sp|Q95028.1|LDH_DROME
8854	1574	G	A	Locus_26571.0|BlastHit|gi|2497623|sp|Q95028.1|LDH_DROME
8860	826	T	G	Locus_26585.0|BlastHit|gi|82121035|sp|Q9YH58.1|FTCD_CHICK
8862	1027	G	A	Locus_26587.0|BlastHit|gi|296452908|sp|Q13435.2|SF3B2_HUMAN
8862	1411	G	A	Locus_26587.0|BlastHit|gi|296452908|sp|Q13435.2|SF3B2_HUMAN
8862	145	G	A	Locus_26587.0|BlastHit|gi|296452908|sp|Q13435.2|SF3B2_HUMAN
8862	1501	A	T	Locus_26587.0|BlastHit|gi|296452908|sp|Q13435.2|SF3B2_HUMAN
8862	1549	C	A	Locus_26587.0|BlastHit|gi|296452908|sp|Q13435.2|SF3B2_HUMAN
8862	1558	C	G	Locus_26587.0|BlastHit|gi|296452908|sp|Q13435.2|SF3B2_HUMAN
8862	190	A	T	Locus_26587.0|BlastHit|gi|296452908|sp|Q13435.2|SF3B2_HUMAN
8886	1075	A	C	Locus_26613.0|BlastHit|gi|313104226|sp|Q3SXM5.3|HSDL1_HUMAN
8899	139	C	A	Locus_26629.0|BlastHit|gi|75060492|sp|Q58DK5.1|HEM2_BOVIN
8899	210	A	G	Locus_26629.0|BlastHit|gi|75060492|sp|Q58DK5.1|HEM2_BOVIN
8899	366	T	A	Locus_26629.0|BlastHit|gi|75060492|sp|Q58DK5.1|HEM2_BOVIN
8899	413	T	G	Locus_26629.0|BlastHit|gi|75060492|sp|Q58DK5.1|HEM2_BOVIN
8899	418	A	G	Locus_26629.0|BlastHit|gi|75060492|sp|Q58DK5.1|HEM2_BOVIN
8916	444	A	G	Locus_26649.0|BlastHit|gi|67460396|sp|Q8BFR5.1|EFTU_MOUSE
8916	759	T	C	Locus_26649.0|BlastHit|gi|67460396|sp|Q8BFR5.1|EFTU_MOUSE
8922	1557	C	T	Locus_26652.0|BlastHit|gi|62510811|sp|Q8HXX2.3|MPI_MACFA
8922	1643	T	C	Locus_26652.0|BlastHit|gi|62510811|sp|Q8HXX2.3|MPI_MACFA
8922	358	C	T	Locus_26652.0|BlastHit|gi|62510811|sp|Q8HXX2.3|MPI_MACFA
8922	556	T	A	Locus_26652.0|BlastHit|gi|62510811|sp|Q8HXX2.3|MPI_MACFA
8927	1455	G	A	Locus_26656.0|BlastHit|gi|8928355|sp|Q9VAN0.1|SERC_DROME
8927	1497	A	T	Locus_26656.0|BlastHit|gi|8928355|sp|Q9VAN0.1|SERC_DROME
8934	1098	C	T	Locus_26665.0|BlastHit|gi|20178134|sp|Q99MN1.1|SYK_MOUSE
8934	2931	C	T	Locus_26665.0|BlastHit|gi|20178134|sp|Q99MN1.1|SYK_MOUSE
8934	3031	A	G	Locus_26665.0|BlastHit|gi|20178134|sp|Q99MN1.1|SYK_MOUSE
8934	570	T	G	Locus_26665.0|BlastHit|gi|20178134|sp|Q99MN1.1|SYK_MOUSE
8937	2092	C	T	Locus_26669.0|BlastHit|gi|5921197|sp|O43852.2|CALU_HUMAN
8942	1699	G	A	Locus_26674.0|BlastHit|gi|5921205|sp|P35381.2|ATPA_DROME
8942	1834	A	C	Locus_26674.0|BlastHit|gi|5921205|sp|P35381.2|ATPA_DROME
8942	2494	G	A	Locus_26674.0|BlastHit|gi|5921205|sp|P35381.2|ATPA_DROME
8942	2578	C	T	Locus_26674.0|BlastHit|gi|5921205|sp|P35381.2|ATPA_DROME
8942	462	T	A	Locus_26674.0|BlastHit|gi|5921205|sp|P35381.2|ATPA_DROME
8942	572	G	A	Locus_26674.0|BlastHit|gi|5921205|sp|P35381.2|ATPA_DROME
8962	1457	C	T	Locus_26698.0|BlastHit|gi|205831554|sp|Q7ZVF3.2|DHSA_DANRE
8962	2538	G	A	Locus_26698.0|BlastHit|gi|205831554|sp|Q7ZVF3.2|DHSA_DANRE
8962	551	A	T	Locus_26698.0|BlastHit|gi|205831554|sp|Q7ZVF3.2|DHSA_DANRE
8973	44	T	C	Locus_26720.0|BlastHit|gi|29336625|sp|Q24799.1|MYPH_ECHGR
8973	720	A	G	Locus_26720.0|BlastHit|gi|29336625|sp|Q24799.1|MYPH_ECHGR
8973	733	G	A	Locus_26720.0|BlastHit|gi|29336625|sp|Q24799.1|MYPH_ECHGR
8973	778	A	G	Locus_26720.0|BlastHit|gi|29336625|sp|Q24799.1|MYPH_ECHGR
8973	783	T	C	Locus_26720.0|BlastHit|gi|29336625|sp|Q24799.1|MYPH_ECHGR
8976	1847	A	C	Locus_26724.0|BlastHit|gi|34922660|sp|Q9U1N0.1|HRP65_CHITE
8985	132	A	C	Locus_26735.1|BlastHit|gi|20532206|sp|O75832.1|PSD10_HUMAN
8985	423	G	A	Locus_26735.1|BlastHit|gi|20532206|sp|O75832.1|PSD10_HUMAN
8988	548	T	C	Locus_26738.0|BlastHit|gi|62510508|sp|Q9CQA6.1|CHCH1_MOUSE
9012	222	T	C	Locus_26760.0|BlastHit|gi|1176952|sp|P45862.1|YWJB_BACSU
9023	1724	A	G	Locus_26778.0|BlastHit|gi|212286044|sp|Q3TV65.2|MPND_MOUSE
9028	2613	A	T	Locus_26787.0|BlastHit|gi|2501094|sp|Q63635.1|STX6_RAT
9053	1495	C	G	Locus_26812.0|BlastHit|gi|81898403|sp|Q8C165.1|P20D1_MOUSE
9067	218	A	C	Locus_26822.0|BlastHit|gi|74750974|sp|Q8N3Y7.2|RDHE2_HUMAN
9067	855	G	A	Locus_26822.0|BlastHit|gi|74750974|sp|Q8N3Y7.2|RDHE2_HUMAN
9074	2958	A	T	Locus_26829.0|BlastHit|gi|52000667|sp|P81900.2|KAPR2_DROME
9076	1279	G	A	Locus_26830.0|BlastHit|gi|2506252|sp|P12815.2|PDCD6_MOUSE
9076	1781	C	T	Locus_26830.0|BlastHit|gi|2506252|sp|P12815.2|PDCD6_MOUSE
9093	190	C	A	Locus_26845.0|BlastHit|gi|74828242|sp|Q9U8W8.1|TL5A_TACTR
9095	764	C	T	Locus_26847.0|BlastHit|gi|121990043|sp|Q295Y7.1|GMPPB_DROPS
9104	658	C	A	Locus_26856.0|BlastHit|gi|6016128|sp|Q62867.1|GGH_RAT
9120	290	A	T	Locus_26871.0|BlastHit|gi|78099120|sp|Q6PCT5.1|PQBP1_RAT
9121	1173	T	C	Locus_26875.0|BlastHit|gi|48428798|sp|Q9I993.1|BCDO1_CHICK
9121	300	A	G	Locus_26875.0|BlastHit|gi|48428798|sp|Q9I993.1|BCDO1_CHICK
9137	625	G	A	Locus_26903.0|BlastHit|gi|341940518|sp|Q8VHK1.3|CSKI2_MOUSE
9138	2709	G	C	Locus_26905.0|BlastHit|gi|1171633|sp|P46441.1|N2B_HAEIR
9145	277	A	G	Locus_26907.1|BlastHit|gi|5921940|sp|P81580.1|CUPC1_CANPG
9152	551	T	C	Locus_26922.0|BlastHit|gi|20141460|sp|P34275.2|IVD_CAEEL
9152	608	C	T	Locus_26922.0|BlastHit|gi|20141460|sp|P34275.2|IVD_CAEEL
9152	788	C	T	Locus_26922.0|BlastHit|gi|20141460|sp|P34275.2|IVD_CAEEL
9153	4311	C	T	Locus_26923.0|BlastHit|gi|90110024|sp|Q02874.4|H2AY_RAT
9154	244	C	A	Locus_26924.0|BlastHit|gi|55976632|sp|Q9XYF4.1|ICENC_DROME
9154	321	C	G,T	Locus_26924.0|BlastHit|gi|55976632|sp|Q9XYF4.1|ICENC_DROME
9154	372	G	A	Locus_26924.0|BlastHit|gi|55976632|sp|Q9XYF4.1|ICENC_DROME
9154	375	A	G	Locus_26924.0|BlastHit|gi|55976632|sp|Q9XYF4.1|ICENC_DROME
9154	834	C	A	Locus_26924.0|BlastHit|gi|55976632|sp|Q9XYF4.1|ICENC_DROME
9155	194	A	T	Locus_26926.0|BlastHit|gi|32469796|sp|Q9YIB9.2|HIF1A_CHICK
9155	771	C	T	Locus_26926.0|BlastHit|gi|32469796|sp|Q9YIB9.2|HIF1A_CHICK
9160	54	T	C	Locus_26930.1|BlastHit|gi|114150027|sp|Q3SZM1.1|MK67I_BOVIN
9165	1236	A	G	Locus_26936.0|BlastHit|gi|83286949|sp|Q8CFY5.1|COX10_MOUSE
9165	1722	T	C	Locus_26936.0|BlastHit|gi|83286949|sp|Q8CFY5.1|COX10_MOUSE
9165	1784	T	C	Locus_26936.0|BlastHit|gi|83286949|sp|Q8CFY5.1|COX10_MOUSE
9165	1884	A	G	Locus_26936.0|BlastHit|gi|83286949|sp|Q8CFY5.1|COX10_MOUSE
9165	582	T	C	Locus_26936.0|BlastHit|gi|83286949|sp|Q8CFY5.1|COX10_MOUSE
9168	289	C	T	Locus_26939.0|BlastHit|gi|82179443|sp|Q5M8F7.1|NEPR1_XENTR
9168	709	T	C	Locus_26939.0|BlastHit|gi|82179443|sp|Q5M8F7.1|NEPR1_XENTR
9171	1558	C	G	Locus_26944.0|BlastHit|gi|1703235|sp|P15122.3|ALDR_RABIT
9171	1723	G	C	Locus_26944.0|BlastHit|gi|1703235|sp|P15122.3|ALDR_RABIT
9171	1740	C	A	Locus_26944.0|BlastHit|gi|1703235|sp|P15122.3|ALDR_RABIT
9171	1815	A	G	Locus_26944.0|BlastHit|gi|1703235|sp|P15122.3|ALDR_RABIT
9171	1990	G	C	Locus_26944.0|BlastHit|gi|1703235|sp|P15122.3|ALDR_RABIT
9171	1993	T	A	Locus_26944.0|BlastHit|gi|1703235|sp|P15122.3|ALDR_RABIT
9193	133	G	A	Locus_26971.0|BlastHit|gi|171769797|sp|A7MCB7.1|TMA16_DANRE
9193	163	G	A	Locus_26971.0|BlastHit|gi|171769797|sp|A7MCB7.1|TMA16_DANRE
9193	232	G	A	Locus_26971.0|BlastHit|gi|171769797|sp|A7MCB7.1|TMA16_DANRE
9193	819	T	A	Locus_26971.0|BlastHit|gi|171769797|sp|A7MCB7.1|TMA16_DANRE
9220	323	G	A	Locus_26998.0|BlastHit|gi|81908014|sp|Q4VAA7.1|SNX33_MOUSE
9221	1766	A	G	Locus_26999.0|BlastHit|gi|82241516|sp|Q7ZX22.1|WDR24_XENLA
9244	5248	C	T	Locus_27014.0|BlastHit|gi|117949389|sp|Q6YHK3.2|CD109_HUMAN
9248	1194	C	T	Locus_27022.0|BlastHit|gi|24212381|sp|Q9D0G0.1|RT30_MOUSE
9248	1239	C	G,T	Locus_27022.0|BlastHit|gi|24212381|sp|Q9D0G0.1|RT30_MOUSE
9252	408	G	A	Locus_27031.0|BlastHit|gi|71153818|sp|Q6AYK5.1|LYAR_RAT
9252	748	G	A	Locus_27031.0|BlastHit|gi|71153818|sp|Q6AYK5.1|LYAR_RAT
9274	1310	T	C	Locus_27053.0|BlastHit|gi|189038855|sp|P24155.4|THOP1_RAT
9274	653	C	T	Locus_27053.0|BlastHit|gi|189038855|sp|P24155.4|THOP1_RAT
9275	566	C	T	Locus_27055.0|BlastHit|gi|18202857|sp|Q9DC48.1|PRP17_MOUSE
9335	184	G	A	Locus_27072.0|BlastHit|gi|46395722|sp|Q7TSG2.1|CTDP1_MOUSE
9349	1975	A	G	Locus_27088.0|BlastHit|gi|172046804|sp|Q4QRK0.2|AMPM1_DANRE
9349	2200	C	T	Locus_27088.0|BlastHit|gi|172046804|sp|Q4QRK0.2|AMPM1_DANRE
9349	2517	A	T	Locus_27088.0|BlastHit|gi|172046804|sp|Q4QRK0.2|AMPM1_DANRE
9355	216	T	C	Locus_27097.0|BlastHit|gi|218526911|sp|Q29GR8.3|MOEH_DROPS
9355	489	C	T	Locus_27097.0|BlastHit|gi|218526911|sp|Q29GR8.3|MOEH_DROPS
9389	630	T	C	Locus_27118.0|BlastHit|gi|384950749|sp|G4WAW9.1|SELM_ERISI
9394	338	T	C	Locus_27127.0|BlastHit|gi|51701458|sp|Q9VCI5.1|DHSD_DROME
9396	304	C	T	Locus_27131.0|BlastHit|gi|74866395|sp|Q94521.1|DNAT_DROME
9416	1211	G	A	Locus_27147.0|BlastHit|gi|296439404|sp|Q8IWX8.3|CHERP_HUMAN
9417	69	G	A	Locus_27148.0|BlastHit|gi|296439445|sp|Q07075.3|AMPE_HUMAN
9421	1786	C	T	Locus_27152.0|BlastHit|gi|112971|sp|P00504.3|AATC_CHICK
9421	1929	A	T	Locus_27152.0|BlastHit|gi|112971|sp|P00504.3|AATC_CHICK
9421	2604	A	G	Locus_27152.0|BlastHit|gi|112971|sp|P00504.3|AATC_CHICK
9421	3133	A	T	Locus_27152.0|BlastHit|gi|112971|sp|P00504.3|AATC_CHICK
9422	881	G	A	Locus_27153.0|BlastHit|gi|6016257|sp|O13224.1|HSPB1_POELU
9422	884	G	C	Locus_27153.0|BlastHit|gi|6016257|sp|O13224.1|HSPB1_POELU
9427	121	C	T	Locus_27160.0|BlastHit|gi|1708509|sp|P10184.2|IOV7_CHICK
9427	763	G	A	Locus_27160.0|BlastHit|gi|1708509|sp|P10184.2|IOV7_CHICK
9427	769	G	A	Locus_27160.0|BlastHit|gi|1708509|sp|P10184.2|IOV7_CHICK
9431	1087	A	C	Locus_27163.0|BlastHit|gi|158514279|sp|A5D8M6.1|SBDS_XENLA
9431	131	T	A	Locus_27163.0|BlastHit|gi|158514279|sp|A5D8M6.1|SBDS_XENLA
9431	143	T	A	Locus_27163.0|BlastHit|gi|158514279|sp|A5D8M6.1|SBDS_XENLA
9431	621	G	A	Locus_27163.0|BlastHit|gi|158514279|sp|A5D8M6.1|SBDS_XENLA
9446	1623	A	G	Locus_27176.0|BlastHit|gi|85701351|sp|P49614.2|HEXB_FELCA
9446	318	C	T	Locus_27176.0|BlastHit|gi|85701351|sp|P49614.2|HEXB_FELCA
9446	786	C	T	Locus_27176.0|BlastHit|gi|85701351|sp|P49614.2|HEXB_FELCA
9449	1612	C	T	Locus_27181.0|BlastHit|gi|75041577|sp|Q5R8J8.1|DNJB4_PONAB
9449	1743	T	A	Locus_27181.0|BlastHit|gi|75041577|sp|Q5R8J8.1|DNJB4_PONAB
9449	996	C	A	Locus_27181.0|BlastHit|gi|75041577|sp|Q5R8J8.1|DNJB4_PONAB
9450	144	G	T	Locus_27182.0|BlastHit|gi|123781627|sp|Q499P8.1|CP058_RAT
9458	934	A	T	Locus_27193.0|BlastHit|gi|123913127|sp|Q28IE5.1|NIT2_XENTR
9467	638	T	A	Locus_27198.0|BlastHit|gi|110825729|sp|P05661.4|MYSA_DROME
9472	226	C	G	Locus_27198.0|BlastHit|gi|110825729|sp|P05661.4|MYSA_DROME
9472	235	T	G	Locus_27198.0|BlastHit|gi|110825729|sp|P05661.4|MYSA_DROME
9482	4068	A	G	Locus_27204.0|BlastHit|gi|51316938|sp|Q9W1A4.1|TAMO_DROME
9485	3097	T	C	Locus_27210.0|BlastHit|gi|21363044|sp|Q9R1R2.1|TRIM3_MOUSE
9500	534	T	A	Locus_27224.0|BlastHit|gi|73920223|sp|P16621.2|LAR_DROME
9504	469	A	G	Locus_27231.0|BlastHit|gi|284433486|sp|A2BE28.1|LAS1L_MOUSE
9505	1268	A	G	Locus_27232.0|BlastHit|gi|59798478|sp|Q9W1V6.1|PRPD3_DROME
9505	1385	A	G	Locus_27232.0|BlastHit|gi|59798478|sp|Q9W1V6.1|PRPD3_DROME
9505	1604	G	A	Locus_27232.0|BlastHit|gi|59798478|sp|Q9W1V6.1|PRPD3_DROME
9505	1829	T	C	Locus_27232.0|BlastHit|gi|59798478|sp|Q9W1V6.1|PRPD3_DROME
9505	626	T	G	Locus_27232.0|BlastHit|gi|59798478|sp|Q9W1V6.1|PRPD3_DROME
9518	130	A	G	Locus_27245.0|BlastHit|gi|81914533|sp|Q8K039.1|K1143_MOUSE
9518	311	G	A	Locus_27245.0|BlastHit|gi|81914533|sp|Q8K039.1|K1143_MOUSE
9518	422	C	T	Locus_27245.0|BlastHit|gi|81914533|sp|Q8K039.1|K1143_MOUSE
9518	461	G	T	Locus_27245.0|BlastHit|gi|81914533|sp|Q8K039.1|K1143_MOUSE
9520	604	G	A	Locus_27248.0|BlastHit|gi|68564977|sp|Q5ZJZ5.1|BDH_CHICK
9520	607	T	C	Locus_27248.0|BlastHit|gi|68564977|sp|Q5ZJZ5.1|BDH_CHICK
9546	2392	T	C	Locus_27255.0|BlastHit|gi|117949609|sp|O00567.4|NOP56_HUMAN
9546	3810	T	A	Locus_27255.0|BlastHit|gi|117949609|sp|O00567.4|NOP56_HUMAN
9550	2060	T	C	Locus_27258.0|BlastHit|gi|81898164|sp|Q8BZA9.1|TIGAR_MOUSE
9555	645	T	G	Locus_27260.0|BlastHit|gi|1709057|sp|P53777.1|MLP1_DROME
9557	1152	A	G	Locus_27261.0|BlastHit|gi|115503757|sp|Q7YQK3.2|4F2_RABIT
9557	144	A	T	Locus_27261.0|BlastHit|gi|115503757|sp|Q7YQK3.2|4F2_RABIT
9557	707	A	G	Locus_27261.0|BlastHit|gi|115503757|sp|Q7YQK3.2|4F2_RABIT
9557	71	C	T	Locus_27261.0|BlastHit|gi|115503757|sp|Q7YQK3.2|4F2_RABIT
9557	906	G	A	Locus_27261.0|BlastHit|gi|115503757|sp|Q7YQK3.2|4F2_RABIT
9557	988	C	T	Locus_27261.0|BlastHit|gi|115503757|sp|Q7YQK3.2|4F2_RABIT
9575	251	C	T	Locus_27275.0|BlastHit|gi|51701612|sp|Q9BX68.1|HINT2_HUMAN
9577	190	T	A	Locus_27276.0|BlastHit|gi|12644364|sp|P91929.2|NDUAA_DROME
9586	445	T	C	Locus_27279.0|BlastHit|gi|73920467|sp|Q6DDF4.1|VPS36_XENLA
9604	1073	T	C	Locus_27301.0|BlastHit|gi|313471772|sp|A1ZA47.2|ZASP_DROME
9604	32	C	T	Locus_27301.0|BlastHit|gi|313471772|sp|A1ZA47.2|ZASP_DROME
9612	912	C	T	Locus_27308.0|BlastHit|gi|6094290|sp|O42260.1|GEMI2_XENLA
9615	1035	G	A	Locus_27310.0|BlastHit|gi|81912107|sp|Q7TQ20.1|DNJC2_RAT
9615	1494	A	G	Locus_27310.0|BlastHit|gi|81912107|sp|Q7TQ20.1|DNJC2_RAT
9615	441	C	T	Locus_27310.0|BlastHit|gi|81912107|sp|Q7TQ20.1|DNJC2_RAT
9618	1503	C	G	Locus_27319.0|BlastHit|gi|3913352|sp|Q27712.1|CP2L1_PANAR
9618	626	C	T	Locus_27319.0|BlastHit|gi|3913352|sp|Q27712.1|CP2L1_PANAR
9624	140	T	A	Locus_27326.0|BlastHit|gi|13123993|sp|Q9VCE1.1|BECN1_DROME
9624	242	C	T	Locus_27326.0|BlastHit|gi|13123993|sp|Q9VCE1.1|BECN1_DROME
9629	1839	G	C	Locus_27333.0|BlastHit|gi|585180|sp|P38040.1|GBG1_DROME
9629	2054	T	C	Locus_27333.0|BlastHit|gi|585180|sp|P38040.1|GBG1_DROME
9643	1197	G	A	Locus_27341.0|BlastHit|gi|215273924|sp|Q5QJ74.2|TBCEL_HUMAN
9643	2514	G	A	Locus_27341.0|BlastHit|gi|215273924|sp|Q5QJ74.2|TBCEL_HUMAN
9643	3495	C	A	Locus_27341.0|BlastHit|gi|215273924|sp|Q5QJ74.2|TBCEL_HUMAN
9652	677	A	G	Locus_27349.0|BlastHit|gi|75040807|sp|Q5NVR2.1|MDHM_PONAB
9652	947	T	C	Locus_27349.0|BlastHit|gi|75040807|sp|Q5NVR2.1|MDHM_PONAB
9659	1376	T	C	Locus_27365.0|BlastHit|gi|118573678|sp|Q3ZBF3.2|RM38_BOVIN
9659	254	G	A	Locus_27365.0|BlastHit|gi|118573678|sp|Q3ZBF3.2|RM38_BOVIN
9659	419	G	A	Locus_27365.0|BlastHit|gi|118573678|sp|Q3ZBF3.2|RM38_BOVIN
9659	425	G	A	Locus_27365.0|BlastHit|gi|118573678|sp|Q3ZBF3.2|RM38_BOVIN
9659	914	G	A	Locus_27365.0|BlastHit|gi|118573678|sp|Q3ZBF3.2|RM38_BOVIN
9662	1208	G	T	Locus_27368.0|BlastHit|gi|81896112|sp|Q8BHG2.1|CA123_MOUSE
9662	1357	T	C	Locus_27368.0|BlastHit|gi|81896112|sp|Q8BHG2.1|CA123_MOUSE
9666	3800	T	C	Locus_27374.0|BlastHit|gi|92090643|sp|Q9EQS0.2|TALDO_RAT
9666	3839	C	A	Locus_27374.0|BlastHit|gi|92090643|sp|Q9EQS0.2|TALDO_RAT
9666	4210	C	A	Locus_27374.0|BlastHit|gi|92090643|sp|Q9EQS0.2|TALDO_RAT
9672	813	T	C	Locus_27383.0|BlastHit|gi|300669687|sp|Q9ULR0.3|ISY1_HUMAN
9675	1107	A	T	Locus_27388.0|BlastHit|gi|146322303|sp|Q9UKU0.4|ACSL6_HUMAN
9675	1821	G	T	Locus_27388.0|BlastHit|gi|146322303|sp|Q9UKU0.4|ACSL6_HUMAN
9677	4012	A	G	Locus_27391.0|BlastHit|gi|97180308|sp|P97868.5|RBBP6_MOUSE
9687	1106	T	C	Locus_27398.1|BlastHit|gi|311033537|sp|A5PLL7.3|TM189_HUMAN
9689	1193	C	G	Locus_27401.0|BlastHit|gi|122132289|sp|Q08DK7.1|MCATL_BOVIN
9689	1702	T	C	Locus_27401.0|BlastHit|gi|122132289|sp|Q08DK7.1|MCATL_BOVIN
9689	1974	T	C	Locus_27401.0|BlastHit|gi|122132289|sp|Q08DK7.1|MCATL_BOVIN
9691	3485	C	T	Locus_27403.0|BlastHit|gi|1730896|sp|P48053.2|YPD1_CAEEL
9691	4019	A	G	Locus_27403.0|BlastHit|gi|1730896|sp|P48053.2|YPD1_CAEEL
9692	240	C	T,A	Locus_27404.0|BlastHit|gi|73622102|sp|Q8TCF1.1|ZFAN1_HUMAN
9692	242	A	G	Locus_27404.0|BlastHit|gi|73622102|sp|Q8TCF1.1|ZFAN1_HUMAN
9692	869	T	C	Locus_27404.0|BlastHit|gi|73622102|sp|Q8TCF1.1|ZFAN1_HUMAN
9692	870	A	T	Locus_27404.0|BlastHit|gi|73622102|sp|Q8TCF1.1|ZFAN1_HUMAN
9716	856	C	T	Locus_27423.0|BlastHit|gi|110808207|sp|Q2KI83.1|DJC17_BOVIN
9725	2883	A	G	Locus_27436.0|BlastHit|gi|296439471|sp|Q8IYB7.4|DI3L2_HUMAN
9725	3027	G	A	Locus_27436.0|BlastHit|gi|296439471|sp|Q8IYB7.4|DI3L2_HUMAN
9725	3589	A	T	Locus_27436.0|BlastHit|gi|296439471|sp|Q8IYB7.4|DI3L2_HUMAN
9725	3882	C	A	Locus_27436.0|BlastHit|gi|296439471|sp|Q8IYB7.4|DI3L2_HUMAN
9725	4161	T	C	Locus_27436.0|BlastHit|gi|296439471|sp|Q8IYB7.4|DI3L2_HUMAN
9725	5496	C	A	Locus_27436.0|BlastHit|gi|296439471|sp|Q8IYB7.4|DI3L2_HUMAN
9726	399	C	T	Locus_27440.0|BlastHit|gi|172045566|sp|P11024.3|NNTM_BOVIN
9733	457	C	T	Locus_27445.3|BlastHit|gi|82185931|sp|Q6NYI0.1|HERP2_DANRE
9746	448	G	A	Locus_27458.0|BlastHit|gi|62901059|sp|Q9VFB2.2|RT10_DROME
9746	571	C	T	Locus_27458.0|BlastHit|gi|62901059|sp|Q9VFB2.2|RT10_DROME
9750	258	C	T	Locus_27462.0|BlastHit|gi|73919326|sp|Q5RJU0.1|SNF8_XENTR
9757	1508	T	C	Locus_27466.0|BlastHit|gi|6919994|sp|Q27245.1|YH24_CAEEL
9757	515	G	C	Locus_27466.0|BlastHit|gi|6919994|sp|Q27245.1|YH24_CAEEL
9798	1556	A	T	Locus_27495.0|BlastHit|gi|82182198|sp|Q6DCC6.1|GTPB6_XENLA
9798	2236	T	C	Locus_27495.0|BlastHit|gi|82182198|sp|Q6DCC6.1|GTPB6_XENLA
9798	659	A	C	Locus_27495.0|BlastHit|gi|82182198|sp|Q6DCC6.1|GTPB6_XENLA
9802	502	G	T	Locus_27499.0|BlastHit|gi|378405194|sp|Q10215.2|RDL_SCHPO
9802	668	G	A	Locus_27499.0|BlastHit|gi|378405194|sp|Q10215.2|RDL_SCHPO
9829	1125	G	A	Locus_27509.0|BlastHit|gi|76364093|sp|P82198.1|BGH3_MOUSE
9829	1635	C	T	Locus_27509.0|BlastHit|gi|76364093|sp|P82198.1|BGH3_MOUSE
9829	1725	C	T	Locus_27509.0|BlastHit|gi|76364093|sp|P82198.1|BGH3_MOUSE
9853	178	A	G	Locus_27524.0|BlastHit|gi|82203611|sp|Q6TGW5.1|OSTF1_DANRE
9853	191	A	G	Locus_27524.0|BlastHit|gi|82203611|sp|Q6TGW5.1|OSTF1_DANRE
9853	226	A	G	Locus_27524.0|BlastHit|gi|82203611|sp|Q6TGW5.1|OSTF1_DANRE
9856	1426	T	C	Locus_27528.0|BlastHit|gi|728991|sp|P39736.1|BX42_DROME
9856	799	C	T	Locus_27528.0|BlastHit|gi|728991|sp|P39736.1|BX42_DROME
9856	940	T	A	Locus_27528.0|BlastHit|gi|728991|sp|P39736.1|BX42_DROME
9856	949	A	C	Locus_27528.0|BlastHit|gi|728991|sp|P39736.1|BX42_DROME
9865	2951	G	T	Locus_27537.0|BlastHit|gi|82186503|sp|Q6P6Z0.1|DDB1_XENLA
9865	3155	C	T	Locus_27537.0|BlastHit|gi|82186503|sp|Q6P6Z0.1|DDB1_XENLA
9870	2263	T	A	Locus_27541.0|BlastHit|gi|118110|sp|P14832.3|CYPH_YEAST
9879	1378	C	T	Locus_27552.0|BlastHit|gi|32699625|sp|Q9VN93.2|CPR1_DROME
9879	1519	C	T	Locus_27552.0|BlastHit|gi|32699625|sp|Q9VN93.2|CPR1_DROME
9879	2343	A	C	Locus_27552.0|BlastHit|gi|32699625|sp|Q9VN93.2|CPR1_DROME
9894	558	G	A	Locus_27577.0|BlastHit|gi|363548515|sp|Q8BP78.3|F10C1_MOUSE
9895	7234	T	C	Locus_27580.5|BlastHit|gi|585173|sp|P38404.1|GNAO_LOCMI
9902	353	C	T	Locus_27587.2|BlastHit|gi|160017861|sp|Q99NH0.2|ANR17_MOUSE
9902	729	T	C	Locus_27587.2|BlastHit|gi|160017861|sp|Q99NH0.2|ANR17_MOUSE
9913	1438	T	C	Locus_27609.0|BlastHit|gi|47115836|sp|Q8IXF9.1|AQ12A_HUMAN
9913	1450	C	A	Locus_27609.0|BlastHit|gi|47115836|sp|Q8IXF9.1|AQ12A_HUMAN
9913	167	G	A	Locus_27609.0|BlastHit|gi|47115836|sp|Q8IXF9.1|AQ12A_HUMAN
9913	278	T	C	Locus_27609.0|BlastHit|gi|47115836|sp|Q8IXF9.1|AQ12A_HUMAN
9928	1113	G	A	Locus_27642.0|BlastHit|gi|81870483|sp|O70244.2|CUBN_RAT
9928	1322	C	T	Locus_27642.0|BlastHit|gi|81870483|sp|O70244.2|CUBN_RAT
9928	1337	T	C	Locus_27642.0|BlastHit|gi|81870483|sp|O70244.2|CUBN_RAT
9928	1345	C	T	Locus_27642.0|BlastHit|gi|81870483|sp|O70244.2|CUBN_RAT
9928	1536	T	G	Locus_27642.0|BlastHit|gi|81870483|sp|O70244.2|CUBN_RAT
9928	1553	C	T	Locus_27642.0|BlastHit|gi|81870483|sp|O70244.2|CUBN_RAT
9928	298	G	A	Locus_27642.0|BlastHit|gi|81870483|sp|O70244.2|CUBN_RAT
9928	313	A	T	Locus_27642.0|BlastHit|gi|81870483|sp|O70244.2|CUBN_RAT
9928	433	T	C	Locus_27642.0|BlastHit|gi|81870483|sp|O70244.2|CUBN_RAT
9934	902	T	C	Locus_27647.0|BlastHit|gi|62286967|sp|Q5I0H9.1|PDIA5_RAT
9935	2202	A	G	Locus_27648.0|BlastHit|gi|341941976|sp|P07742.2|RIR1_MOUSE
9940	1612	T	G	Locus_27653.0|BlastHit|gi|30580490|sp|Q9EPA7.2|NMNA1_MOUSE
9940	404	A	G	Locus_27653.0|BlastHit|gi|30580490|sp|Q9EPA7.2|NMNA1_MOUSE
9940	464	T	C	Locus_27653.0|BlastHit|gi|30580490|sp|Q9EPA7.2|NMNA1_MOUSE
9940	664	A	T	Locus_27653.0|BlastHit|gi|30580490|sp|Q9EPA7.2|NMNA1_MOUSE
9941	203	C	T	Locus_27654.0|BlastHit|gi|55583896|sp|Q6P268.1|PDCL3_DANRE
9944	1119	A	G	Locus_27663.0|BlastHit|gi|75571184|sp|Q5ZHS1.1|ELP3_CHICK
9944	444	A	T	Locus_27663.0|BlastHit|gi|75571184|sp|Q5ZHS1.1|ELP3_CHICK
9945	468	A	G	Locus_27664.0|BlastHit|gi|124076972|sp|P00031.2|CYC_MACMA
9945	533	C	T	Locus_27664.0|BlastHit|gi|124076972|sp|P00031.2|CYC_MACMA
9946	430	A	C	Locus_27664.0|BlastHit|gi|124076983|sp|P00040.2|CYC_SCHGR
9946	785	A	T	Locus_27664.0|BlastHit|gi|124076983|sp|P00040.2|CYC_SCHGR
9946	793	G	T	Locus_27664.0|BlastHit|gi|124076983|sp|P00040.2|CYC_SCHGR
9967	1470	T	C	Locus_27678.0|BlastHit|gi|81883800|sp|Q5XIL3.1|RPC3_RAT
9971	695	T	C	Locus_27686.0|BlastHit|gi|182702124|sp|O42412.3|IOD3_CHICK
9980	689	C	T	Locus_27697.0|BlastHit|gi|38372481|sp|Q8BGA9.1|OXA1L_MOUSE
10000	1276	C	T	Locus_27720.0|BlastHit|gi|68067543|sp|P07192.2|MAL3_DROME
10000	1585	C	T	Locus_27720.0|BlastHit|gi|68067543|sp|P07192.2|MAL3_DROME
10002	383	C	A	Locus_27724.0|BlastHit|gi|73621177|sp|Q6P1C6.1|LRIG3_MOUSE
10009	2211	G	T	Locus_27729.0|BlastHit|gi|10720326|sp|O57429.1|UBP2_CHICK
10012	438	G	A	Locus_27731.0|BlastHit|gi|82182166|sp|Q6DC58.1|TM223_DANRE
10012	672	C	T	Locus_27731.0|BlastHit|gi|82182166|sp|Q6DC58.1|TM223_DANRE
10012	734	G	A	Locus_27731.0|BlastHit|gi|82182166|sp|Q6DC58.1|TM223_DANRE
10027	500	A	G	Locus_27750.1|BlastHit|gi|308153402|sp|P46952.2|3HAO_HUMAN
10027	528	A	G	Locus_27750.1|BlastHit|gi|308153402|sp|P46952.2|3HAO_HUMAN
10027	611	T	C	Locus_27750.1|BlastHit|gi|308153402|sp|P46952.2|3HAO_HUMAN
10028	526	A	T	Locus_27751.0|BlastHit|gi|121717|sp|P04905.2|GSTM1_RAT
10029	1327	A	G	Locus_27752.0|BlastHit|gi|341942246|sp|Q9EQ80.4|NIF3L_MOUSE
10029	470	C	T	Locus_27752.0|BlastHit|gi|341942246|sp|Q9EQ80.4|NIF3L_MOUSE
10029	556	T	G	Locus_27752.0|BlastHit|gi|341942246|sp|Q9EQ80.4|NIF3L_MOUSE
10029	577	G	A	Locus_27752.0|BlastHit|gi|341942246|sp|Q9EQ80.4|NIF3L_MOUSE
10030	1558	C	G	Locus_27753.0|BlastHit|gi|56404954|sp|Q9CQS5.1|RIOK2_MOUSE
10030	511	C	T	Locus_27753.0|BlastHit|gi|56404954|sp|Q9CQS5.1|RIOK2_MOUSE
10038	102	T	C	Locus_27764.0|BlastHit|gi|21541962|sp|Q9QZU7.1|BODG_RAT
10038	525	G	C	Locus_27764.0|BlastHit|gi|21541962|sp|Q9QZU7.1|BODG_RAT
10061	1521	T	A	Locus_27771.0|BlastHit|gi|74947746|sp|Q9VCC0.1|CHRD1_DROME
10061	2415	T	C	Locus_27771.0|BlastHit|gi|74947746|sp|Q9VCC0.1|CHRD1_DROME
10061	542	A	G	Locus_27771.0|BlastHit|gi|74947746|sp|Q9VCC0.1|CHRD1_DROME
10061	579	C	A	Locus_27771.0|BlastHit|gi|74947746|sp|Q9VCC0.1|CHRD1_DROME
10061	593	A	G	Locus_27771.0|BlastHit|gi|74947746|sp|Q9VCC0.1|CHRD1_DROME
10062	102	A	G	Locus_27772.0|BlastHit|gi|123928|sp|P07687.1|HYEP_RAT
10062	1111	G	C	Locus_27772.0|BlastHit|gi|123928|sp|P07687.1|HYEP_RAT
10062	769	A	T	Locus_27772.0|BlastHit|gi|123928|sp|P07687.1|HYEP_RAT
10067	1843	T	C	Locus_27778.0|BlastHit|gi|114713|sp|P17735.1|ATTY_HUMAN
10077	1085	A	T	Locus_27783.0|BlastHit|gi|20139021|sp|Q91642.1|PEPE_XENLA
10077	366	G	A	Locus_27783.0|BlastHit|gi|20139021|sp|Q91642.1|PEPE_XENLA
10077	943	C	T	Locus_27783.0|BlastHit|gi|20139021|sp|Q91642.1|PEPE_XENLA
10077	973	G	A	Locus_27783.0|BlastHit|gi|20139021|sp|Q91642.1|PEPE_XENLA
10079	1541	T	A	Locus_27785.1|BlastHit|gi|6015057|sp|Q92005.1|EF1A_DANRE
10079	2790	C	G	Locus_27785.1|BlastHit|gi|6015057|sp|Q92005.1|EF1A_DANRE
10079	761	A	G	Locus_27785.1|BlastHit|gi|6015057|sp|Q92005.1|EF1A_DANRE
10084	2380	A	T	Locus_27792.0|BlastHit|gi|92090990|sp|Q9H1I8.3|ASCC2_HUMAN
10085	2078	C	T	Locus_27793.0|BlastHit|gi|38502957|sp|Q863A4.1|DYXC1_PONPY
10087	1274	A	C	Locus_27796.0|BlastHit|gi|263504738|sp|A6QLE5.1|NALP3_BOVIN
10104	3600	G	A	Locus_27811.0|BlastHit|gi|46396380|sp|Q86W26.1|NAL10_HUMAN
10114	419	C	G	Locus_27819.0|BlastHit|gi|81906067|sp|Q9DB60.1|PGFS_MOUSE
10123	1249	T	G	Locus_27823.0|BlastHit|gi|122143481|sp|Q0VCA9.1|TMED6_BOVIN
10123	845	G	T	Locus_27823.0|BlastHit|gi|122143481|sp|Q0VCA9.1|TMED6_BOVIN
10130	508	C	G	Locus_27829.0|BlastHit|gi|10720060|sp|Q9XYN1.1|INX2_SCHAM
10131	1304	G	A	Locus_27830.0|BlastHit|gi|20138067|sp|Q9UHB6.1|LIMA1_HUMAN
10131	1483	T	A	Locus_27830.0|BlastHit|gi|20138067|sp|Q9UHB6.1|LIMA1_HUMAN
10131	1485	A	T	Locus_27830.0|BlastHit|gi|20138067|sp|Q9UHB6.1|LIMA1_HUMAN
10131	1734	A	T	Locus_27830.0|BlastHit|gi|20138067|sp|Q9UHB6.1|LIMA1_HUMAN
10131	2138	T	C	Locus_27830.0|BlastHit|gi|20138067|sp|Q9UHB6.1|LIMA1_HUMAN
10131	2931	G	A	Locus_27830.0|BlastHit|gi|20138067|sp|Q9UHB6.1|LIMA1_HUMAN
10131	3317	G	A	Locus_27830.0|BlastHit|gi|20138067|sp|Q9UHB6.1|LIMA1_HUMAN
10149	961	G	A	Locus_27840.0|BlastHit|gi|52782794|sp|Q9NUQ9.1|FA49B_HUMAN
10155	810	G	T	Locus_27847.0|BlastHit|gi|75536771|sp|Q4UMH6.1|Y381_RICFE
10171	1872	T	C	Locus_27868.0|BlastHit|gi|6685604|sp|Q9Y259.3|CHKB_HUMAN
10171	2254	C	T	Locus_27868.0|BlastHit|gi|6685604|sp|Q9Y259.3|CHKB_HUMAN
10189	662	A	G	Locus_27886.0|BlastHit|gi|22256976|sp|Q96I34.1|PP16A_HUMAN
10209	1123	G	A	Locus_27909.0|BlastHit|gi|122140235|sp|Q3SZJ4.1|PTGR1_BOVIN
10213	1000	C	G	Locus_27912.0|BlastHit|gi|464320|sp|P34714.1|SPRC_CAEEL
10213	1006	G	A	Locus_27912.0|BlastHit|gi|464320|sp|P34714.1|SPRC_CAEEL
10213	481	A	G	Locus_27912.0|BlastHit|gi|464320|sp|P34714.1|SPRC_CAEEL
10213	574	G	A	Locus_27912.0|BlastHit|gi|464320|sp|P34714.1|SPRC_CAEEL
10221	235	G	C	Locus_27922.0|BlastHit|gi|61211707|sp|O93403.1|CHST3_TORCA
10222	474	C	A	Locus_27923.0|BlastHit|gi|20141376|sp|P40939.2|ECHA_HUMAN
10222	957	G	A	Locus_27923.0|BlastHit|gi|20141376|sp|P40939.2|ECHA_HUMAN
10230	1114	G	T	Locus_27929.0|BlastHit|gi|110278902|sp|Q99MB4.2|CBWD1_RAT
10238	1699	G	C	Locus_27939.0|BlastHit|gi|81884709|sp|Q6DFW4.1|NOP58_MOUSE
10254	1071	T	C	Locus_27960.0|BlastHit|gi|74748828|sp|Q6IQ49.1|CA055_HUMAN
10254	1510	C	T	Locus_27960.0|BlastHit|gi|74748828|sp|Q6IQ49.1|CA055_HUMAN
10254	376	T	A	Locus_27960.0|BlastHit|gi|74748828|sp|Q6IQ49.1|CA055_HUMAN
10254	503	A	T	Locus_27960.0|BlastHit|gi|74748828|sp|Q6IQ49.1|CA055_HUMAN
10254	830	A	T	Locus_27960.0|BlastHit|gi|74748828|sp|Q6IQ49.1|CA055_HUMAN
10259	802	T	G	Locus_27965.0|BlastHit|gi|122140411|sp|Q3T0V9.1|DEOC_BOVIN
10261	425	G	A	Locus_27968.0|BlastHit|gi|21362539|sp|Q9V9Z9.1|EBP2_DROME
10261	464	T	C	Locus_27968.0|BlastHit|gi|21362539|sp|Q9V9Z9.1|EBP2_DROME
10268	327	C	A	Locus_27978.1|BlastHit|gi|134047806|sp|Q99828.4|CIB1_HUMAN
10268	642	G	A	Locus_27978.1|BlastHit|gi|134047806|sp|Q99828.4|CIB1_HUMAN
10268	811	T	A	Locus_27978.1|BlastHit|gi|134047806|sp|Q99828.4|CIB1_HUMAN
10290	1644	G	A	Locus_27989.0|BlastHit|gi|34223744|sp|Q9VCR7.2|CTNS_DROME
10290	282	T	C	Locus_27989.0|BlastHit|gi|34223744|sp|Q9VCR7.2|CTNS_DROME
10290	299	T	A	Locus_27989.0|BlastHit|gi|34223744|sp|Q9VCR7.2|CTNS_DROME
10307	1649	T	C	Locus_28017.3|BlastHit|gi|341940613|sp|P28271.3|ACOC_MOUSE
10307	64	A	T	Locus_28017.3|BlastHit|gi|341940613|sp|P28271.3|ACOC_MOUSE
10311	248	T	C	Locus_28021.0|BlastHit|gi|51316507|sp|Q924Z4.1|CERS2_MOUSE
10316	1277	G	T	Locus_28027.0|BlastHit|gi|29839592|sp|Q90673.1|PRLD1_CHICK
10316	1754	C	T	Locus_28027.0|BlastHit|gi|29839592|sp|Q90673.1|PRLD1_CHICK
10316	1766	C	T	Locus_28027.0|BlastHit|gi|29839592|sp|Q90673.1|PRLD1_CHICK
10316	2236	T	C	Locus_28027.0|BlastHit|gi|29839592|sp|Q90673.1|PRLD1_CHICK
10316	2261	C	T	Locus_28027.0|BlastHit|gi|29839592|sp|Q90673.1|PRLD1_CHICK
10316	3062	C	T	Locus_28027.0|BlastHit|gi|29839592|sp|Q90673.1|PRLD1_CHICK
10325	1260	A	G	Locus_28039.0|BlastHit|gi|141653|sp|P18729.1|ZG57_XENLA
10326	634	C	T	Locus_28040.0|BlastHit|gi|57015283|sp|O55102.2|BL1S1_MOUSE
10326	676	C	T	Locus_28040.0|BlastHit|gi|57015283|sp|O55102.2|BL1S1_MOUSE
10326	766	A	T	Locus_28040.0|BlastHit|gi|57015283|sp|O55102.2|BL1S1_MOUSE
10364	1542	G	A	Locus_28047.0|BlastHit|gi|1352712|sp|P05120.2|PAI2_HUMAN
10367	1607	G	A	Locus_28053.0|BlastHit|gi|6136677|sp|O02485.1|YDJ1_CAEEL
10367	2168	C	G	Locus_28053.0|BlastHit|gi|6136677|sp|O02485.1|YDJ1_CAEEL
10367	220	T	G	Locus_28053.0|BlastHit|gi|6136677|sp|O02485.1|YDJ1_CAEEL
10367	2429	T	A	Locus_28053.0|BlastHit|gi|6136677|sp|O02485.1|YDJ1_CAEEL
10367	2798	A	G	Locus_28053.0|BlastHit|gi|6136677|sp|O02485.1|YDJ1_CAEEL
10368	182	C	T	Locus_28055.0|BlastHit|gi|123910179|sp|Q28C74.1|LPPRC_XENTR
10369	8745	G	T	Locus_28056.0|BlastHit|gi|73920223|sp|P16621.2|LAR_DROME
10369	8884	G	A	Locus_28056.0|BlastHit|gi|73920223|sp|P16621.2|LAR_DROME
10369	8969	C	A	Locus_28056.0|BlastHit|gi|73920223|sp|P16621.2|LAR_DROME
10375	1333	G	C	Locus_28062.0|BlastHit|gi|20981679|sp|P52209.3|6PGD_HUMAN
10375	1429	T	A	Locus_28062.0|BlastHit|gi|20981679|sp|P52209.3|6PGD_HUMAN
10375	1660	T	C	Locus_28062.0|BlastHit|gi|20981679|sp|P52209.3|6PGD_HUMAN
10375	292	A	T	Locus_28062.0|BlastHit|gi|20981679|sp|P52209.3|6PGD_HUMAN
10377	218	G	A	Locus_28065.0|BlastHit|gi|131863|sp|P04388.2|RAS2_DROME
10378	311	C	A,T	Locus_28067.0|BlastHit|gi|20141712|sp|P29508.2|SPB3_HUMAN
10378	365	G	C	Locus_28067.0|BlastHit|gi|20141712|sp|P29508.2|SPB3_HUMAN
10379	1020	A	G	Locus_28067.1|BlastHit|gi|462410|sp|P05619.3|ILEU_HORSE
10385	2852	C	T	Locus_28069.0|BlastHit|gi|51316655|sp|Q6PFT6.1|TMM47_DANRE
10409	560	C	T	Locus_28086.0|BlastHit|gi|338817662|sp|C0KJQ4.2|ALPS_PORTR
10409	649	A	T	Locus_28086.0|BlastHit|gi|338817662|sp|C0KJQ4.2|ALPS_PORTR
10416	1197	A	G	Locus_28095.0|BlastHit|gi|20139178|sp|Q9HBI1.1|PARVB_HUMAN
10416	1248	C	T	Locus_28095.0|BlastHit|gi|20139178|sp|Q9HBI1.1|PARVB_HUMAN
10416	483	C	A	Locus_28095.0|BlastHit|gi|20139178|sp|Q9HBI1.1|PARVB_HUMAN
10416	645	C	T	Locus_28095.0|BlastHit|gi|20139178|sp|Q9HBI1.1|PARVB_HUMAN
10418	345	C	T	Locus_28098.0|BlastHit|gi|135584|sp|P10039.2|TENA_CHICK
10418	423	A	G	Locus_28098.0|BlastHit|gi|135584|sp|P10039.2|TENA_CHICK
10436	1235	T	C	Locus_28117.0|BlastHit|gi|82183203|sp|Q6DH69.1|FAH2A_DANRE
10446	1807	C	T	Locus_28125.0|BlastHit|gi|121328|sp|P13255.2|GNMT_RAT
10446	1867	T	C	Locus_28125.0|BlastHit|gi|121328|sp|P13255.2|GNMT_RAT
10446	544	C	G	Locus_28125.0|BlastHit|gi|121328|sp|P13255.2|GNMT_RAT
10446	566	G	A	Locus_28125.0|BlastHit|gi|121328|sp|P13255.2|GNMT_RAT
10446	90	A	C	Locus_28125.0|BlastHit|gi|121328|sp|P13255.2|GNMT_RAT
10447	857	A	G	Locus_28126.0|BlastHit|gi|2493535|sp|P89116.1|CASP1_SPOFR
10454	1365	C	T	Locus_28133.0|BlastHit|gi|119359|sp|P08110.1|ENPL_CHICK
10454	705	A	G	Locus_28133.0|BlastHit|gi|119359|sp|P08110.1|ENPL_CHICK
10456	918	G	A	Locus_28133.1|BlastHit|gi|190359360|sp|Q4AEH7.2|GPX2_CEBAP
10457	676	G	T	Locus_28135.0|BlastHit|gi|82115038|sp|Q9I923.1|RGN_CHICK
10458	161	A	T	Locus_28136.0|BlastHit|gi|68052427|sp|Q5DUB2.1|NK2R_CANFA
10458	194	G	T	Locus_28136.0|BlastHit|gi|68052427|sp|Q5DUB2.1|NK2R_CANFA
10488	1200	C	T	Locus_28154.0|BlastHit|gi|20139238|sp|Q9NY93.1|DDX56_HUMAN
10488	1380	T	C	Locus_28154.0|BlastHit|gi|20139238|sp|Q9NY93.1|DDX56_HUMAN
10488	471	T	C	Locus_28154.0|BlastHit|gi|20139238|sp|Q9NY93.1|DDX56_HUMAN
10488	513	G	A	Locus_28154.0|BlastHit|gi|20139238|sp|Q9NY93.1|DDX56_HUMAN
10488	533	A	G	Locus_28154.0|BlastHit|gi|20139238|sp|Q9NY93.1|DDX56_HUMAN
10488	861	C	T	Locus_28154.0|BlastHit|gi|20139238|sp|Q9NY93.1|DDX56_HUMAN
10490	2261	A	G	Locus_28156.0|BlastHit|gi|123884466|sp|Q08CX5.1|TBC24_XENTR
10491	1238	T	C	Locus_28159.0|BlastHit|gi|166219770|sp|P0C606.1|SGF29_RAT
10491	1345	G	T	Locus_28159.0|BlastHit|gi|166219770|sp|P0C606.1|SGF29_RAT
10495	992	C	T	Locus_28164.0|BlastHit|gi|33302633|sp|Q9VLS1.2|KPBB_DROME
10502	1249	G	A	Locus_28170.0|BlastHit|gi|729072|sp|P80363.1|CCB23_ORCLI
10509	1993	G	A	Locus_28175.0|BlastHit|gi|81875546|sp|Q8BWQ4.1|FTSJ1_MOUSE
10509	2068	G	C	Locus_28175.0|BlastHit|gi|81875546|sp|Q8BWQ4.1|FTSJ1_MOUSE
10510	1343	C	G	Locus_28176.1|BlastHit|gi|311033473|sp|P30838.3|AL3A1_HUMAN
10510	1721	A	G	Locus_28176.1|BlastHit|gi|311033473|sp|P30838.3|AL3A1_HUMAN
10510	860	T	G	Locus_28176.1|BlastHit|gi|311033473|sp|P30838.3|AL3A1_HUMAN
10514	255	G	A	Locus_28183.0|BlastHit|gi|75042696|sp|Q5RFT1.1|CB018_PONAB
10514	399	G	T	Locus_28183.0|BlastHit|gi|75042696|sp|Q5RFT1.1|CB018_PONAB
10517	462	T	C	Locus_28185.0|BlastHit|gi|121949074|sp|Q496Y0.1|LONF3_HUMAN
10529	3016	C	T	Locus_28194.1|BlastHit|gi|281312187|sp|A2A6Q5.1|CDC27_MOUSE
10532	189	G	A	Locus_28199.0|BlastHit|gi|134053|sp|P10735.1|RT12_DROME
10532	765	A	G	Locus_28199.0|BlastHit|gi|134053|sp|P10735.1|RT12_DROME
10548	1434	C	T	Locus_28211.1|BlastHit|gi|20141580|sp|Q02978.3|M2OM_HUMAN
10548	1449	T	A	Locus_28211.1|BlastHit|gi|20141580|sp|Q02978.3|M2OM_HUMAN
10548	2257	T	C	Locus_28211.1|BlastHit|gi|20141580|sp|Q02978.3|M2OM_HUMAN
10552	1055	T	C	Locus_28216.0|BlastHit|gi|145559525|sp|P82925.3|RT31_BOVIN
10552	869	T	C	Locus_28216.0|BlastHit|gi|145559525|sp|P82925.3|RT31_BOVIN
10554	1955	C	T	Locus_28221.0|BlastHit|gi|118572819|sp|Q2KJI7.1|AFG32_BOVIN
10563	280	C	A	Locus_28229.0|BlastHit|gi|21542476|sp|P34298.2|DUOXA_CAEEL
10564	1063	G	A	Locus_28231.0|BlastHit|gi|108860959|sp|Q2KID9.1|RT05_BOVIN
10564	1197	A	G	Locus_28231.0|BlastHit|gi|108860959|sp|Q2KID9.1|RT05_BOVIN
10565	1530	C	T	Locus_28234.0|BlastHit|gi|3913391|sp|O02387.1|CU17_BOMMO
10565	1685	G	A	Locus_28234.0|BlastHit|gi|3913391|sp|O02387.1|CU17_BOMMO
10565	1917	C	T	Locus_28234.0|BlastHit|gi|3913391|sp|O02387.1|CU17_BOMMO
10565	448	G	T	Locus_28234.0|BlastHit|gi|3913391|sp|O02387.1|CU17_BOMMO
10565	695	T	C	Locus_28234.0|BlastHit|gi|3913391|sp|O02387.1|CU17_BOMMO
10565	718	G	T	Locus_28234.0|BlastHit|gi|3913391|sp|O02387.1|CU17_BOMMO
10580	1951	G	A	Locus_28246.0|BlastHit|gi|122145942|sp|Q2F7Z7.1|TMM59_PIG
10580	2077	G	A	Locus_28246.0|BlastHit|gi|122145942|sp|Q2F7Z7.1|TMM59_PIG
10580	272	C	T	Locus_28246.0|BlastHit|gi|122145942|sp|Q2F7Z7.1|TMM59_PIG
10582	181	T	A	Locus_28248.0|BlastHit|gi|115502344|sp|Q0MQG7.1|NDUS3_GORGO
10582	184	A	G	Locus_28248.0|BlastHit|gi|115502344|sp|Q0MQG7.1|NDUS3_GORGO
10595	271	A	G	Locus_28265.0|BlastHit|gi|1172740|sp|P42556.1|PTR1_LEITA
10601	851	G	A	Locus_28268.0|BlastHit|gi|115311862|sp|Q1XHY1.1|RT18B_PANTR
10602	1317	T	C	Locus_28269.0|BlastHit|gi|110825795|sp|P07031.2|ACYP2_CHICK
10602	1338	C	T	Locus_28269.0|BlastHit|gi|110825795|sp|P07031.2|ACYP2_CHICK
10602	1457	T	G	Locus_28269.0|BlastHit|gi|110825795|sp|P07031.2|ACYP2_CHICK
10602	2465	A	G	Locus_28269.0|BlastHit|gi|110825795|sp|P07031.2|ACYP2_CHICK
10602	2741	T	C	Locus_28269.0|BlastHit|gi|110825795|sp|P07031.2|ACYP2_CHICK
10602	2794	T	A	Locus_28269.0|BlastHit|gi|110825795|sp|P07031.2|ACYP2_CHICK
10604	685	T	C	Locus_28272.0|BlastHit|gi|74897764|sp|Q56R10.1|ASTA_PENMO
10606	1785	C	T	Locus_28281.0|BlastHit|gi|6685412|sp|O76767.1|ERD2_DROME
10612	2063	G	A	Locus_28287.0|BlastHit|gi|313118235|sp|B2D0J5.1|EST6_APIME
10623	779	G	A	Locus_28296.0|BlastHit|gi|5915892|sp|P81589.1|CUC11_CANPG
10623	796	A	G	Locus_28296.0|BlastHit|gi|5915892|sp|P81589.1|CUC11_CANPG
10624	852	T	C	Locus_28296.0|BlastHit|gi|5915892|sp|P81589.1|CUC11_CANPG
10634	1167	G	A	Locus_28306.0|BlastHit|gi|127717|sp|P29218.1|IMPA1_HUMAN
10634	267	C	A	Locus_28306.0|BlastHit|gi|127717|sp|P29218.1|IMPA1_HUMAN
10635	714	A	G	Locus_28307.0|BlastHit|gi|47116230|sp|Q91Z53.1|GRHPR_MOUSE
10641	1652	G	A	Locus_28311.0|BlastHit|gi|259016214|sp|Q6PEE2.2|CTIF_MOUSE
10641	3270	C	G	Locus_28311.0|BlastHit|gi|259016214|sp|Q6PEE2.2|CTIF_MOUSE
10641	828	A	G	Locus_28311.0|BlastHit|gi|259016214|sp|Q6PEE2.2|CTIF_MOUSE
10647	398	C	A	Locus_28323.0|BlastHit|gi|75041803|sp|Q5R9Y3.1|ABT1_PONAB
10647	476	T	C	Locus_28323.0|BlastHit|gi|75041803|sp|Q5R9Y3.1|ABT1_PONAB
10647	664	A	G	Locus_28323.0|BlastHit|gi|75041803|sp|Q5R9Y3.1|ABT1_PONAB
10647	83	G	A	Locus_28323.0|BlastHit|gi|75041803|sp|Q5R9Y3.1|ABT1_PONAB
10648	1122	G	T	Locus_28324.0|BlastHit|gi|74724707|sp|Q6IMI6.1|ST1C3_HUMAN
10650	1098	A	G	Locus_28328.0|BlastHit|gi|122140310|sp|Q3T001.1|H17B6_BOVIN
10650	289	G	T	Locus_28328.0|BlastHit|gi|122140310|sp|Q3T001.1|H17B6_BOVIN
10650	409	A	G	Locus_28328.0|BlastHit|gi|122140310|sp|Q3T001.1|H17B6_BOVIN
10652	271	C	A	Locus_28330.0|BlastHit|gi|118921|sp|P21704.1|DNAS1_RAT
10653	2959	C	T	Locus_28331.0|BlastHit|gi|48474224|sp|Q8SQC1.1|SCRB1_PIG
10657	807	A	G	Locus_28338.0|BlastHit|gi|75024694|sp|Q9TXJ0.1|CMK1_CAEEL
10657	963	C	A	Locus_28338.0|BlastHit|gi|75024694|sp|Q9TXJ0.1|CMK1_CAEEL
10665	1018	T	C	Locus_28349.0|BlastHit|gi|81914299|sp|Q8CDF7.1|EXD1_MOUSE
10665	1453	C	G	Locus_28349.0|BlastHit|gi|81914299|sp|Q8CDF7.1|EXD1_MOUSE
10666	1014	T	A	Locus_28353.0|BlastHit|gi|13124123|sp|Q13630.1|FCL_HUMAN
10666	623	T	C	Locus_28353.0|BlastHit|gi|13124123|sp|Q13630.1|FCL_HUMAN
10674	1375	G	A	Locus_28361.0|BlastHit|gi|74753513|sp|Q9Y5Z4.1|HEBP2_HUMAN
10674	1541	A	C	Locus_28361.0|BlastHit|gi|74753513|sp|Q9Y5Z4.1|HEBP2_HUMAN
10674	1845	T	C	Locus_28361.0|BlastHit|gi|74753513|sp|Q9Y5Z4.1|HEBP2_HUMAN
10675	608	C	T	Locus_28365.0|BlastHit|gi|73622220|sp|Q5FW48.1|ASPD_XENTR
10675	936	A	G	Locus_28365.0|BlastHit|gi|73622220|sp|Q5FW48.1|ASPD_XENTR
10680	1255	C	T	Locus_28371.0|BlastHit|gi|122140334|sp|Q3T062.1|RRP15_BOVIN
10680	283	T	C	Locus_28371.0|BlastHit|gi|122140334|sp|Q3T062.1|RRP15_BOVIN
10680	604	C	T	Locus_28371.0|BlastHit|gi|122140334|sp|Q3T062.1|RRP15_BOVIN
10680	694	A	C	Locus_28371.0|BlastHit|gi|122140334|sp|Q3T062.1|RRP15_BOVIN
10682	197	A	C	Locus_28373.0|BlastHit|gi|119367393|sp|Q4H0T5.1|TFAM_PRECR
10683	560	T	C	Locus_28374.0|BlastHit|gi|74948615|sp|Q9VVI9.2|CHMP5_DROME
10683	839	G	A	Locus_28374.0|BlastHit|gi|74948615|sp|Q9VVI9.2|CHMP5_DROME
10683	899	G	A	Locus_28374.0|BlastHit|gi|74948615|sp|Q9VVI9.2|CHMP5_DROME
10690	1177	G	T,A	Locus_28381.0|BlastHit|gi|30580455|sp|Q9D0T2.1|DUS12_MOUSE
10695	1405	A	G	Locus_28387.0|BlastHit|gi|229463041|sp|O14681.4|EI24_HUMAN
10695	1538	G	A,C	Locus_28387.0|BlastHit|gi|229463041|sp|O14681.4|EI24_HUMAN
10699	612	T	C	Locus_28391.0|BlastHit|gi|81906595|sp|Q9JHS9.1|CWC15_MOUSE
10699	695	T	A	Locus_28391.0|BlastHit|gi|81906595|sp|Q9JHS9.1|CWC15_MOUSE
10718	441	C	T	Locus_28417.0|BlastHit|gi|29611875|sp|Q8R5K5.1|UTP11_RAT
10718	645	G	A	Locus_28417.0|BlastHit|gi|29611875|sp|Q8R5K5.1|UTP11_RAT
10728	2512	G	C	Locus_28428.1|BlastHit|gi|317373385|sp|O75581.2|LRP6_HUMAN
10730	1022	A	G	Locus_28430.0|BlastHit|gi|60415944|sp|Q9UJZ1.1|STML2_HUMAN
10731	1201	C	T	Locus_28431.0|BlastHit|gi|121956694|sp|Q3T0R7.1|THIM_BOVIN
10731	232	G	A	Locus_28431.0|BlastHit|gi|121956694|sp|Q3T0R7.1|THIM_BOVIN
10732	80	T	C	Locus_28432.0|BlastHit|gi|6016103|sp|O73819.1|GNA14_XENLA
10739	10	T	G	Locus_28440.0|BlastHit|gi|18201959|sp|O13035.1|SAP_CHICK
10743	1099	C	T	Locus_28449.0|BlastHit|gi|12644153|sp|P20007.2|PPCK_DROME
10750	1286	A	G	Locus_28461.0|BlastHit|gi|81889014|sp|Q5I0D7.1|PEPD_RAT
10750	1298	G	A	Locus_28461.0|BlastHit|gi|81889014|sp|Q5I0D7.1|PEPD_RAT
10750	1763	G	T	Locus_28461.0|BlastHit|gi|81889014|sp|Q5I0D7.1|PEPD_RAT
10758	546	C	T	Locus_28474.0|BlastHit|gi|81886959|sp|P70684.1|PGDH_CAVPO
10758	558	A	G	Locus_28474.0|BlastHit|gi|81886959|sp|P70684.1|PGDH_CAVPO
10758	561	G	C	Locus_28474.0|BlastHit|gi|81886959|sp|P70684.1|PGDH_CAVPO
10758	603	G	A	Locus_28474.0|BlastHit|gi|81886959|sp|P70684.1|PGDH_CAVPO
10772	1039	C	T	Locus_28493.0|BlastHit|gi|75027588|sp|Q9VVA0.1|Y9705_DROME
10772	1083	A	G	Locus_28493.0|BlastHit|gi|75027588|sp|Q9VVA0.1|Y9705_DROME
10772	2503	A	T	Locus_28493.0|BlastHit|gi|75027588|sp|Q9VVA0.1|Y9705_DROME
10772	2870	G	T	Locus_28493.0|BlastHit|gi|75027588|sp|Q9VVA0.1|Y9705_DROME
10772	2921	G	T	Locus_28493.0|BlastHit|gi|75027588|sp|Q9VVA0.1|Y9705_DROME
10772	2948	G	T	Locus_28493.0|BlastHit|gi|75027588|sp|Q9VVA0.1|Y9705_DROME
10772	3012	G	A	Locus_28493.0|BlastHit|gi|75027588|sp|Q9VVA0.1|Y9705_DROME
10772	396	A	G	Locus_28493.0|BlastHit|gi|75027588|sp|Q9VVA0.1|Y9705_DROME
10774	642	C	A	Locus_28498.0|BlastHit|gi|29428062|sp|Q9VDE5.1|PPAN_DROME
10802	1066	A	G	Locus_28514.0|BlastHit|gi|74748975|sp|Q6NT16.1|S18B1_HUMAN
10802	1501	C	G	Locus_28514.0|BlastHit|gi|74748975|sp|Q6NT16.1|S18B1_HUMAN
10815	4404	C	A	Locus_28523.0|BlastHit|gi|81878506|sp|Q8K2A1.1|GULP1_MOUSE
10826	1511	T	A	Locus_28533.0|BlastHit|gi|108860789|sp|Q2KIZ8.1|MCM6_BOVIN
10826	725	T	C	Locus_28533.0|BlastHit|gi|108860789|sp|Q2KIZ8.1|MCM6_BOVIN
10826	797	A	C	Locus_28533.0|BlastHit|gi|108860789|sp|Q2KIZ8.1|MCM6_BOVIN
10837	1455	G	A	Locus_28541.0|BlastHit|gi|82178433|sp|Q58EJ9.1|MOSC1_DANRE
10837	1558	G	A	Locus_28541.0|BlastHit|gi|82178433|sp|Q58EJ9.1|MOSC1_DANRE
10837	1567	T	A	Locus_28541.0|BlastHit|gi|82178433|sp|Q58EJ9.1|MOSC1_DANRE
10837	1803	T	C	Locus_28541.0|BlastHit|gi|82178433|sp|Q58EJ9.1|MOSC1_DANRE
10837	742	T	C	Locus_28541.0|BlastHit|gi|82178433|sp|Q58EJ9.1|MOSC1_DANRE
10837	772	T	C	Locus_28541.0|BlastHit|gi|82178433|sp|Q58EJ9.1|MOSC1_DANRE
10844	1042	T	A	Locus_28549.0|BlastHit|gi|33518622|sp|Q9VHR8.2|DPP3_DROME
10844	2053	C	T	Locus_28549.0|BlastHit|gi|33518622|sp|Q9VHR8.2|DPP3_DROME
10845	29	C	T	Locus_28551.0|BlastHit|gi|5921943|sp|P81583.1|CUPC4_CANPG
10845	89	C	T	Locus_28551.0|BlastHit|gi|5921943|sp|P81583.1|CUPC4_CANPG
10857	220	G	A	Locus_28563.0|BlastHit|gi|296439475|sp|Q9NRY5.4|F1142_HUMAN
10861	1085	A	G	Locus_28568.0|BlastHit|gi|75050397|sp|Q9MYY0.2|HPSE_BOVIN
10861	306	C	T	Locus_28568.0|BlastHit|gi|75050397|sp|Q9MYY0.2|HPSE_BOVIN
10861	884	G	A	Locus_28568.0|BlastHit|gi|75050397|sp|Q9MYY0.2|HPSE_BOVIN
10861	896	T	C	Locus_28568.0|BlastHit|gi|75050397|sp|Q9MYY0.2|HPSE_BOVIN
10865	1044	A	T	Locus_28574.0|BlastHit|gi|13124177|sp|O61491.1|FLOT1_DROME
10865	1524	T	G	Locus_28574.0|BlastHit|gi|13124177|sp|O61491.1|FLOT1_DROME
10865	369	T	C	Locus_28574.0|BlastHit|gi|13124177|sp|O61491.1|FLOT1_DROME
10865	57	G	A	Locus_28574.0|BlastHit|gi|13124177|sp|O61491.1|FLOT1_DROME
10865	702	C	G	Locus_28574.0|BlastHit|gi|13124177|sp|O61491.1|FLOT1_DROME
10866	40	C	T	Locus_28575.0|BlastHit|gi|417289|sp|Q00719.1|MDMC_STRMY
10867	504	T	A	Locus_28575.1|BlastHit|gi|75014084|sp|Q86IC8.1|CAMT2_DICDI
10871	2202	A	T	Locus_28579.0|BlastHit|gi|82125466|sp|Q5F4B8.1|S46A3_CHICK
10873	1059	A	G	Locus_28586.0|BlastHit|gi|59797902|sp|O75629.1|CREG1_HUMAN
10873	2706	G	A	Locus_28586.0|BlastHit|gi|59797902|sp|O75629.1|CREG1_HUMAN
10874	337	G	A	Locus_28587.0|BlastHit|gi|26006706|sp|Q8R1S0.2|COQ6_MOUSE
10875	624	C	T	Locus_28587.1|BlastHit|gi|26006706|sp|Q8R1S0.2|COQ6_MOUSE
10882	1014	G	A	Locus_28595.0|BlastHit|gi|14286157|sp|Q01604.2|PGK_DROME
10882	1215	A	G	Locus_28595.0|BlastHit|gi|14286157|sp|Q01604.2|PGK_DROME
10882	1461	C	T	Locus_28595.0|BlastHit|gi|14286157|sp|Q01604.2|PGK_DROME
10907	1099	T	G	Locus_28615.0|BlastHit|gi|20455192|sp|Q9UKK9.1|NUDT5_HUMAN
10907	1100	G	T	Locus_28615.0|BlastHit|gi|20455192|sp|Q9UKK9.1|NUDT5_HUMAN
10907	1124	A	G	Locus_28615.0|BlastHit|gi|20455192|sp|Q9UKK9.1|NUDT5_HUMAN
10907	1707	A	C	Locus_28615.0|BlastHit|gi|20455192|sp|Q9UKK9.1|NUDT5_HUMAN
10907	1749	T	G	Locus_28615.0|BlastHit|gi|20455192|sp|Q9UKK9.1|NUDT5_HUMAN
10907	1861	A	T	Locus_28615.0|BlastHit|gi|20455192|sp|Q9UKK9.1|NUDT5_HUMAN
10908	2528	C	T	Locus_28616.0|BlastHit|gi|114162|sp|P18824.1|ARM_DROME
10909	216	C	T	Locus_28617.0|BlastHit|gi|156630951|sp|A2BIG9.1|LSMD1_DANRE
10909	659	T	G	Locus_28617.0|BlastHit|gi|156630951|sp|A2BIG9.1|LSMD1_DANRE
10909	735	T	C	Locus_28617.0|BlastHit|gi|156630951|sp|A2BIG9.1|LSMD1_DANRE
10923	1215	A	G	Locus_28627.0|BlastHit|gi|52788305|sp|Q9Z2I9.2|SUCB1_MOUSE
10923	1292	A	G	Locus_28627.0|BlastHit|gi|52788305|sp|Q9Z2I9.2|SUCB1_MOUSE
10923	236	G	A	Locus_28627.0|BlastHit|gi|52788305|sp|Q9Z2I9.2|SUCB1_MOUSE
10923	528	A	T	Locus_28627.0|BlastHit|gi|52788305|sp|Q9Z2I9.2|SUCB1_MOUSE
10938	162	G	A	Locus_28640.4|BlastHit|gi|3287776|sp|P81388.1|CU04_HOMAM
10939	192	C	T	Locus_28640.4|BlastHit|gi|3287776|sp|P81388.1|CU04_HOMAM
10942	276	T	A	Locus_28640.4|BlastHit|gi|3287772|sp|P81384.1|CU1A_HOMAM
10942	295	G	T	Locus_28640.4|BlastHit|gi|3287772|sp|P81384.1|CU1A_HOMAM
10947	317	G	C	Locus_28640.4|BlastHit|gi|3287772|sp|P81384.1|CU1A_HOMAM
10947	337	G	T	Locus_28640.4|BlastHit|gi|3287772|sp|P81384.1|CU1A_HOMAM
10948	468	C	G	Locus_28640.4|BlastHit|gi|5921936|sp|P81576.1|CUPA2_CANPG
10948	487	G	T	Locus_28640.4|BlastHit|gi|5921936|sp|P81576.1|CUPA2_CANPG
10950	323	G	T	Locus_28640.4|BlastHit|gi|3287772|sp|P81384.1|CU1A_HOMAM
10950	53	A	T	Locus_28640.4|BlastHit|gi|3287772|sp|P81384.1|CU1A_HOMAM
10966	119	C	A	Locus_28659.0|BlastHit|gi|121940968|sp|Q24JQ0.1|TM241_HUMAN
10966	433	A	G	Locus_28659.0|BlastHit|gi|121940968|sp|Q24JQ0.1|TM241_HUMAN
10979	1444	G	T	Locus_28666.0|BlastHit|gi|82184085|sp|Q6GMK6.1|TSN9_DANRE
10981	1751	G	A	Locus_28670.0|BlastHit|gi|189081212|sp|A6QLU7.1|F115C_BOVIN
10981	1764	C	T	Locus_28670.0|BlastHit|gi|189081212|sp|A6QLU7.1|F115C_BOVIN
10981	1783	A	G	Locus_28670.0|BlastHit|gi|189081212|sp|A6QLU7.1|F115C_BOVIN
10982	867	G	A	Locus_28671.0|BlastHit|gi|81885455|sp|Q6P9U1.1|NUD22_RAT
10983	517	T	C	Locus_28672.0|BlastHit|gi|34395789|sp|Q8TC12.2|RDH11_HUMAN
10991	1144	C	T	Locus_28684.0|BlastHit|gi|187609599|sp|A7SMW7.1|L2HDH_NEMVE
10991	1801	C	T	Locus_28684.0|BlastHit|gi|187609599|sp|A7SMW7.1|L2HDH_NEMVE
10991	530	A	C	Locus_28684.0|BlastHit|gi|187609599|sp|A7SMW7.1|L2HDH_NEMVE
10991	59	A	G	Locus_28684.0|BlastHit|gi|187609599|sp|A7SMW7.1|L2HDH_NEMVE
10991	759	T	C	Locus_28684.0|BlastHit|gi|187609599|sp|A7SMW7.1|L2HDH_NEMVE
10991	997	A	G	Locus_28684.0|BlastHit|gi|187609599|sp|A7SMW7.1|L2HDH_NEMVE
10996	4022	A	T	Locus_28689.0|BlastHit|gi|81873757|sp|Q8BH24.1|TM9S4_MOUSE
11008	1131	G	A	Locus_28703.1|BlastHit|gi|110282935|sp|P20004.4|ACON_BOVIN
11008	1302	A	C	Locus_28703.1|BlastHit|gi|110282935|sp|P20004.4|ACON_BOVIN
11008	627	G	C	Locus_28703.1|BlastHit|gi|110282935|sp|P20004.4|ACON_BOVIN
11008	638	C	T	Locus_28703.1|BlastHit|gi|110282935|sp|P20004.4|ACON_BOVIN
11008	735	A	G	Locus_28703.1|BlastHit|gi|110282935|sp|P20004.4|ACON_BOVIN
11009	1132	C	T	Locus_28704.0|BlastHit|gi|82237531|sp|Q6P616.1|RBM22_XENTR
11009	1744	G	T	Locus_28704.0|BlastHit|gi|82237531|sp|Q6P616.1|RBM22_XENTR
11010	125	C	G	Locus_28705.0|BlastHit|gi|317412185|sp|C1BXU5.1|UBL4A_ESOLU
11012	8673	A	C	Locus_28707.0|BlastHit|gi|2851461|sp|Q03755.2|CUT1_CAEEL
11018	148	T	A	Locus_28713.0|BlastHit|gi|20177939|sp|Q9NZ01.1|TECR_HUMAN
11018	189	T	C	Locus_28713.0|BlastHit|gi|20177939|sp|Q9NZ01.1|TECR_HUMAN
11018	314	A	T	Locus_28713.0|BlastHit|gi|20177939|sp|Q9NZ01.1|TECR_HUMAN
11028	3497	A	T	Locus_28723.0|BlastHit|gi|6094466|sp|Q28864.1|TFPI1_MACMU
11028	3619	G	A	Locus_28723.0|BlastHit|gi|6094466|sp|Q28864.1|TFPI1_MACMU
11028	4232	A	G	Locus_28723.0|BlastHit|gi|6094466|sp|Q28864.1|TFPI1_MACMU
11057	1500	G	C	Locus_28734.0|BlastHit|gi|51316882|sp|Q8WVM8.4|SCFD1_HUMAN
11057	911	G	A	Locus_28734.0|BlastHit|gi|51316882|sp|Q8WVM8.4|SCFD1_HUMAN
11068	388	A	G	Locus_28743.0|BlastHit|gi|296452899|sp|Q99884.2|SC6A7_HUMAN
11093	1417	C	T	Locus_28745.0|BlastHit|gi|136643|sp|P25867.1|UBCD1_DROME
11096	1222	A	G	Locus_28745.3|BlastHit|gi|73919224|sp|Q6PH85.1|DCNL2_HUMAN
11110	735	C	G	Locus_28752.0|BlastHit|gi|73921653|sp|Q9GLN7.1|ACE_PANTR
11114	375	T	A	Locus_28755.0|BlastHit|gi|10720057|sp|Q9VAS7.1|INX3_DROME
11114	388	G	A	Locus_28755.0|BlastHit|gi|10720057|sp|Q9VAS7.1|INX3_DROME
11115	155	T	A	Locus_28757.0|BlastHit|gi|238065895|sp|B5SNZ6.1|ABRA_PIG
11116	562	G	A	Locus_28758.1|BlastHit|gi|75070497|sp|Q5R5V4.1|ILK_PONAB
11126	287	T	C	Locus_28772.0|BlastHit|gi|182701417|sp|Q5EA11.2|TTC4_BOVIN
11129	640	T	C	Locus_28778.0|BlastHit|gi|121755|sp|P11167.1|GTR1_RAT
11129	908	C	T	Locus_28778.0|BlastHit|gi|121755|sp|P11167.1|GTR1_RAT
11131	344	C	A	Locus_28780.0|BlastHit|gi|74872350|sp|Q9W2D6.1|TIM10_DROME
11131	376	C	A	Locus_28780.0|BlastHit|gi|74872350|sp|Q9W2D6.1|TIM10_DROME
11131	536	C	G	Locus_28780.0|BlastHit|gi|74872350|sp|Q9W2D6.1|TIM10_DROME
11132	287	A	T	Locus_28781.0|BlastHit|gi|82228534|sp|Q4V842.1|GPTC4_XENLA
11132	974	C	A	Locus_28781.0|BlastHit|gi|82228534|sp|Q4V842.1|GPTC4_XENLA
11132	995	C	G	Locus_28781.0|BlastHit|gi|82228534|sp|Q4V842.1|GPTC4_XENLA
11140	591	G	A	Locus_28784.0|BlastHit|gi|221222504|sp|Q293F6.2|SSRP1_DROPS
11143	108	T	C	Locus_28791.0|BlastHit|gi|85681897|sp|Q9Z2I8.3|SUCB2_MOUSE
11143	89	C	A	Locus_28791.0|BlastHit|gi|85681897|sp|Q9Z2I8.3|SUCB2_MOUSE
11144	611	T	A	Locus_28792.0|BlastHit|gi|82178112|sp|Q567E6.1|CQ10B_DANRE
11152	1201	A	G	Locus_28797.0|BlastHit|gi|122142874|sp|Q2TU62.1|CLCA1_HORSE
11152	805	A	T	Locus_28797.0|BlastHit|gi|122142874|sp|Q2TU62.1|CLCA1_HORSE
11152	944	A	G	Locus_28797.0|BlastHit|gi|122142874|sp|Q2TU62.1|CLCA1_HORSE
11153	195	T	C	Locus_28798.0|BlastHit|gi|1706098|sp|P51590.1|CP2J3_RAT
11153	2018	A	G	Locus_28798.0|BlastHit|gi|1706098|sp|P51590.1|CP2J3_RAT
11153	2041	A	T	Locus_28798.0|BlastHit|gi|1706098|sp|P51590.1|CP2J3_RAT
11153	2062	T	A	Locus_28798.0|BlastHit|gi|1706098|sp|P51590.1|CP2J3_RAT
11153	929	T	G	Locus_28798.0|BlastHit|gi|1706098|sp|P51590.1|CP2J3_RAT
11155	384	C	G	Locus_28800.0|BlastHit|gi|205371857|sp|P90850.3|YCF2E_CAEEL
11155	387	G	C	Locus_28800.0|BlastHit|gi|205371857|sp|P90850.3|YCF2E_CAEEL
11155	436	T	C	Locus_28800.0|BlastHit|gi|205371857|sp|P90850.3|YCF2E_CAEEL
11155	828	C	T	Locus_28800.0|BlastHit|gi|205371857|sp|P90850.3|YCF2E_CAEEL
11156	363	C	G	Locus_28801.0|BlastHit|gi|68566025|sp|Q5TUE9.1|RM23_ANOGA
11156	535	A	C	Locus_28801.0|BlastHit|gi|68566025|sp|Q5TUE9.1|RM23_ANOGA
11162	793	T	C	Locus_28810.0|BlastHit|gi|81880060|sp|Q99JW2.1|ACY1_MOUSE
11162	976	G	A	Locus_28810.0|BlastHit|gi|81880060|sp|Q99JW2.1|ACY1_MOUSE
11162	997	C	A	Locus_28810.0|BlastHit|gi|81880060|sp|Q99JW2.1|ACY1_MOUSE
11172	4129	G	A	Locus_28816.0|BlastHit|gi|20139135|sp|Q9C5Y0.2|PLDD1_ARATH
11172	4292	A	G	Locus_28816.0|BlastHit|gi|20139135|sp|Q9C5Y0.2|PLDD1_ARATH
11172	4293	A	T,C	Locus_28816.0|BlastHit|gi|20139135|sp|Q9C5Y0.2|PLDD1_ARATH
11172	4440	C	T	Locus_28816.0|BlastHit|gi|20139135|sp|Q9C5Y0.2|PLDD1_ARATH
11172	4545	A	G	Locus_28816.0|BlastHit|gi|20139135|sp|Q9C5Y0.2|PLDD1_ARATH
11174	1441	G	A	Locus_28819.0|BlastHit|gi|3913352|sp|Q27712.1|CP2L1_PANAR
11175	1097	C	A	Locus_28820.0|BlastHit|gi|74746390|sp|Q5TFE4.1|NT5D1_HUMAN
11175	1112	G	A	Locus_28820.0|BlastHit|gi|74746390|sp|Q5TFE4.1|NT5D1_HUMAN
11175	1214	C	A	Locus_28820.0|BlastHit|gi|74746390|sp|Q5TFE4.1|NT5D1_HUMAN
11175	1694	C	T	Locus_28820.0|BlastHit|gi|74746390|sp|Q5TFE4.1|NT5D1_HUMAN
11175	2078	C	T	Locus_28820.0|BlastHit|gi|74746390|sp|Q5TFE4.1|NT5D1_HUMAN
11175	2404	C	A	Locus_28820.0|BlastHit|gi|74746390|sp|Q5TFE4.1|NT5D1_HUMAN
11175	2874	A	G	Locus_28820.0|BlastHit|gi|74746390|sp|Q5TFE4.1|NT5D1_HUMAN
11175	2920	C	T	Locus_28820.0|BlastHit|gi|74746390|sp|Q5TFE4.1|NT5D1_HUMAN
11175	308	T	C	Locus_28820.0|BlastHit|gi|74746390|sp|Q5TFE4.1|NT5D1_HUMAN
11175	3366	G	C	Locus_28820.0|BlastHit|gi|74746390|sp|Q5TFE4.1|NT5D1_HUMAN
11175	3599	T	C	Locus_28820.0|BlastHit|gi|74746390|sp|Q5TFE4.1|NT5D1_HUMAN
11178	5509	T	C	Locus_28824.0|BlastHit|gi|114791|sp|P13808.1|B3A2_MOUSE
11190	1006	A	T	Locus_28840.0|BlastHit|gi|27151704|sp|Q9Y6N5.1|SQRD_HUMAN
11190	1471	A	G	Locus_28840.0|BlastHit|gi|27151704|sp|Q9Y6N5.1|SQRD_HUMAN
11190	724	G	A	Locus_28840.0|BlastHit|gi|27151704|sp|Q9Y6N5.1|SQRD_HUMAN
11190	925	T	G	Locus_28840.0|BlastHit|gi|27151704|sp|Q9Y6N5.1|SQRD_HUMAN
11204	94	T	C	Locus_28852.0|BlastHit|gi|6647560|sp|Q24368.1|ISWI_DROME
11207	437	C	T	Locus_28852.6|BlastHit|gi|85718625|sp|Q5EB97.2|ZCH10_RAT
11218	1229	G	T	Locus_28862.0|BlastHit|gi|51316109|sp|Q9QZN4.1|FBX6_MOUSE
11218	1439	C	T	Locus_28862.0|BlastHit|gi|51316109|sp|Q9QZN4.1|FBX6_MOUSE
11235	1006	A	G	Locus_28871.0|BlastHit|gi|67460945|sp|Q86BJ3.1|PIPE_DROME
11235	1124	T	C	Locus_28871.0|BlastHit|gi|67460945|sp|Q86BJ3.1|PIPE_DROME
11235	1573	G	A	Locus_28871.0|BlastHit|gi|67460945|sp|Q86BJ3.1|PIPE_DROME
11257	2042	A	T	Locus_28875.0|BlastHit|gi|122135053|sp|Q24K02.1|IDE_BOVIN
11258	1486	G	T	Locus_28877.0|BlastHit|gi|76363312|sp|Q5M9F1.1|RBM34_RAT
11263	985	G	A	Locus_28884.0|BlastHit|gi|215273952|sp|Q9W5U2.2|CHIT3_DROME
11263	992	G	A	Locus_28884.0|BlastHit|gi|215273952|sp|Q9W5U2.2|CHIT3_DROME
11266	1025	C	T	Locus_28885.0|BlastHit|gi|75029576|sp|Q9Y140.1|DHRS7_DROME
11266	1063	T	C	Locus_28885.0|BlastHit|gi|75029576|sp|Q9Y140.1|DHRS7_DROME
11266	1271	A	T	Locus_28885.0|BlastHit|gi|75029576|sp|Q9Y140.1|DHRS7_DROME
11266	1692	C	T	Locus_28885.0|BlastHit|gi|75029576|sp|Q9Y140.1|DHRS7_DROME
11266	1983	T	C	Locus_28885.0|BlastHit|gi|75029576|sp|Q9Y140.1|DHRS7_DROME
11266	422	C	T	Locus_28885.0|BlastHit|gi|75029576|sp|Q9Y140.1|DHRS7_DROME
11266	423	T	C	Locus_28885.0|BlastHit|gi|75029576|sp|Q9Y140.1|DHRS7_DROME
11266	692	C	A,T	Locus_28885.0|BlastHit|gi|75029576|sp|Q9Y140.1|DHRS7_DROME
11266	960	C	A	Locus_28885.0|BlastHit|gi|75029576|sp|Q9Y140.1|DHRS7_DROME
11285	2902	A	T	Locus_28894.0|BlastHit|gi|81917524|sp|Q9JK24.2|P2R3C_MOUSE
11311	613	T	A	Locus_28905.0|BlastHit|gi|57012693|sp|Q8BMS4.1|COQ3_MOUSE
11311	916	C	T	Locus_28905.0|BlastHit|gi|57012693|sp|Q8BMS4.1|COQ3_MOUSE
11321	2394	C	T	Locus_28918.0|BlastHit|gi|74731379|sp|Q96CT7.1|CC124_HUMAN
11321	2699	G	T	Locus_28918.0|BlastHit|gi|74731379|sp|Q96CT7.1|CC124_HUMAN
11321	2763	C	T	Locus_28918.0|BlastHit|gi|74731379|sp|Q96CT7.1|CC124_HUMAN
11321	2956	A	C	Locus_28918.0|BlastHit|gi|74731379|sp|Q96CT7.1|CC124_HUMAN
11323	165	C	T	Locus_28919.0|BlastHit|gi|9910617|sp|Q9W6S5.1|ALLC_XENLA
11340	468	T	G	Locus_28930.0|BlastHit|gi|81884339|sp|Q68FP5.1|SPN1_RAT
11359	1573	A	G	Locus_28950.0|BlastHit|gi|123908244|sp|Q08BL7.1|GLCTK_DANRE
11360	635	G	A	Locus_28951.0|BlastHit|gi|3913373|sp|Q90497.1|CRYAA_EUDEL
11360	662	A	G	Locus_28951.0|BlastHit|gi|3913373|sp|Q90497.1|CRYAA_EUDEL
11369	423	A	T,C	Locus_28962.0|BlastHit|gi|75076495|sp|Q4R6U7.1|RM30_MACFA
11369	553	C	T	Locus_28962.0|BlastHit|gi|75076495|sp|Q4R6U7.1|RM30_MACFA
11369	605	A	G	Locus_28962.0|BlastHit|gi|75076495|sp|Q4R6U7.1|RM30_MACFA
11369	710	C	T	Locus_28962.0|BlastHit|gi|75076495|sp|Q4R6U7.1|RM30_MACFA
11369	761	A	G	Locus_28962.0|BlastHit|gi|75076495|sp|Q4R6U7.1|RM30_MACFA
11369	860	C	T	Locus_28962.0|BlastHit|gi|75076495|sp|Q4R6U7.1|RM30_MACFA
11369	863	A	G	Locus_28962.0|BlastHit|gi|75076495|sp|Q4R6U7.1|RM30_MACFA
11382	181	G	A	Locus_28980.0|BlastHit|gi|21542021|sp|Q9VAI1.1|CIA30_DROME
11383	1014	A	G	Locus_28980.0|BlastHit|gi|21542021|sp|Q9VAI1.1|CIA30_DROME
11383	531	A	T	Locus_28980.0|BlastHit|gi|21542021|sp|Q9VAI1.1|CIA30_DROME
11384	198	C	A	Locus_28982.1|BlastHit|gi|74584400|sp|Q59P03.1|NCB5R_CANAL
11388	399	A	G	Locus_28988.0|BlastHit|gi|3183086|sp|Q90935.1|NEUS_CHICK
11429	1023	G	A	Locus_29030.0|BlastHit|gi|77416574|sp|O08623.1|SQSTM_RAT
11429	936	C	T	Locus_29030.0|BlastHit|gi|77416574|sp|O08623.1|SQSTM_RAT
11434	3306	G	A	Locus_29034.0|BlastHit|gi|17380291|sp|Q92900.2|RENT1_HUMAN
11434	3866	G	A	Locus_29034.0|BlastHit|gi|17380291|sp|Q92900.2|RENT1_HUMAN
11436	1815	A	C	Locus_29036.0|BlastHit|gi|12230398|sp|Q9JJK4.1|PEX3_RAT
11436	1915	C	T	Locus_29036.0|BlastHit|gi|12230398|sp|Q9JJK4.1|PEX3_RAT
11437	688	C	T	Locus_29037.0|BlastHit|gi|75054780|sp|Q5R5X9.1|SMYD4_PONAB
11437	961	C	A	Locus_29037.0|BlastHit|gi|75054780|sp|Q5R5X9.1|SMYD4_PONAB
11480	5248	G	A	Locus_29057.0|BlastHit|gi|67461073|sp|Q9CWP6.2|MSPD2_MOUSE
11491	875	A	G	Locus_29066.0|BlastHit|gi|60390624|sp|Q66S03.1|NATTE_THANI
11491	89	T	A	Locus_29066.0|BlastHit|gi|60390624|sp|Q66S03.1|NATTE_THANI
11510	1723	T	C	Locus_29072.0|BlastHit|gi|82081935|sp|Q5ZK33.1|LETM1_CHICK
11510	767	A	T	Locus_29072.0|BlastHit|gi|82081935|sp|Q5ZK33.1|LETM1_CHICK
11521	81	T	A	Locus_29085.1|BlastHit|gi|82173834|sp|Q5TZ07.1|PPAC2_DANRE
11530	1812	A	G	Locus_29088.2|BlastHit|gi|60390624|sp|Q66S03.1|NATTE_THANI
11533	434	G	A	Locus_29089.0|BlastHit|gi|82237294|sp|Q6NX31.1|MCM7_XENTR
11533	488	T	C	Locus_29089.0|BlastHit|gi|82237294|sp|Q6NX31.1|MCM7_XENTR
11533	884	G	A	Locus_29089.0|BlastHit|gi|82237294|sp|Q6NX31.1|MCM7_XENTR
11535	1486	C	T	Locus_29092.0|BlastHit|gi|74738645|sp|Q7RTX9.1|MOT14_HUMAN
11536	414	C	A	Locus_29093.0|BlastHit|gi|38372289|sp|Q24134.2|NELFD_DROME
11539	920	A	C	Locus_29096.0|BlastHit|gi|341940173|sp|Q9R0W9.2|ACHA6_MOUSE
11550	374	T	C	Locus_29105.0|BlastHit|gi|108861919|sp|Q2TBG8.1|UCHL3_BOVIN
11552	518	T	C	Locus_29109.0|BlastHit|gi|1352330|sp|P47823.1|EI2BE_RABIT
11552	92	G	A	Locus_29109.0|BlastHit|gi|1352330|sp|P47823.1|EI2BE_RABIT
11553	1457	G	A	Locus_29109.0|BlastHit|gi|82187285|sp|Q6PGY5.1|DJC21_DANRE
11553	1505	G	T	Locus_29109.0|BlastHit|gi|82187285|sp|Q6PGY5.1|DJC21_DANRE
11553	1568	G	A	Locus_29109.0|BlastHit|gi|82187285|sp|Q6PGY5.1|DJC21_DANRE
11553	1612	G	A	Locus_29109.0|BlastHit|gi|82187285|sp|Q6PGY5.1|DJC21_DANRE
11555	1224	G	A	Locus_29110.0|BlastHit|gi|135981|sp|P08953.1|TOLL_DROME
11555	1723	C	T	Locus_29110.0|BlastHit|gi|135981|sp|P08953.1|TOLL_DROME
11555	909	G	A	Locus_29110.0|BlastHit|gi|135981|sp|P08953.1|TOLL_DROME
11571	1133	C	T	Locus_29128.0|BlastHit|gi|66774173|sp|Q62703.2|RCN2_RAT
11571	608	C	T	Locus_29128.0|BlastHit|gi|66774173|sp|Q62703.2|RCN2_RAT
11571	786	G	T	Locus_29128.0|BlastHit|gi|66774173|sp|Q62703.2|RCN2_RAT
11572	1049	G	A	Locus_29131.0|BlastHit|gi|152031592|sp|P27867.4|DHSO_RAT
11572	1118	G	A	Locus_29131.0|BlastHit|gi|152031592|sp|P27867.4|DHSO_RAT
11572	1124	A	G	Locus_29131.0|BlastHit|gi|152031592|sp|P27867.4|DHSO_RAT
11572	188	C	T	Locus_29131.0|BlastHit|gi|152031592|sp|P27867.4|DHSO_RAT
11572	206	G	A	Locus_29131.0|BlastHit|gi|152031592|sp|P27867.4|DHSO_RAT
11572	509	G	A	Locus_29131.0|BlastHit|gi|152031592|sp|P27867.4|DHSO_RAT
11572	536	C	A	Locus_29131.0|BlastHit|gi|152031592|sp|P27867.4|DHSO_RAT
11572	596	G	A	Locus_29131.0|BlastHit|gi|152031592|sp|P27867.4|DHSO_RAT
11572	653	G	T	Locus_29131.0|BlastHit|gi|152031592|sp|P27867.4|DHSO_RAT
11572	716	A	G	Locus_29131.0|BlastHit|gi|152031592|sp|P27867.4|DHSO_RAT
11572	761	A	C	Locus_29131.0|BlastHit|gi|152031592|sp|P27867.4|DHSO_RAT
11572	950	C	T	Locus_29131.0|BlastHit|gi|152031592|sp|P27867.4|DHSO_RAT
11572	989	C	T	Locus_29131.0|BlastHit|gi|152031592|sp|P27867.4|DHSO_RAT
11581	3864	A	T	Locus_29138.0|BlastHit|gi|75042795|sp|Q5TJF0.1|VPS52_CANFA
11588	284	A	G	Locus_29147.0|BlastHit|gi|50401564|sp|Q8C2A2.2|SEN54_MOUSE
11588	329	G	C	Locus_29147.0|BlastHit|gi|50401564|sp|Q8C2A2.2|SEN54_MOUSE
11590	32	A	G	Locus_29153.0|BlastHit|gi|20455034|sp|Q20140.1|KAD1_CAEEL
11599	1132	G	T	Locus_29164.1|BlastHit|gi|148887465|sp|P24399.2|ZN239_MOUSE
11611	1615	T	A	Locus_29172.0|BlastHit|gi|117949833|sp|P50143.2|TCPG_XENLA
11613	1267	T	G	Locus_29174.0|BlastHit|gi|81917204|sp|Q9DC33.1|HM20A_MOUSE
11613	1346	G	C	Locus_29174.0|BlastHit|gi|81917204|sp|Q9DC33.1|HM20A_MOUSE
11613	555	T	A	Locus_29174.0|BlastHit|gi|81917204|sp|Q9DC33.1|HM20A_MOUSE
11614	1581	C	T	Locus_29175.0|BlastHit|gi|48428181|sp|Q9VGY6.2|SKEL1_DROME
11614	347	C	G	Locus_29175.0|BlastHit|gi|48428181|sp|Q9VGY6.2|SKEL1_DROME
11618	1604	G	A	Locus_29177.0|BlastHit|gi|25009458|sp|Q8VCT9.1|TESK2_MOUSE
11618	2016	G	A	Locus_29177.0|BlastHit|gi|25009458|sp|Q8VCT9.1|TESK2_MOUSE
[truncated: 1,913 more rows]

## Sheet: ALL SNP HEALTHY
#Unigene	POS	REF	ALT	Loco_id
10000	111	T	C	Locus_27720.0|BlastHit|gi|68067543|sp|P07192.2|MAL3_DROME
10002	2758	A	G	Locus_27724.0|BlastHit|gi|73621177|sp|Q6P1C6.1|LRIG3_MOUSE
10002	5101	A	G	Locus_27724.0|BlastHit|gi|73621177|sp|Q6P1C6.1|LRIG3_MOUSE
10012	109	G	A	Locus_27731.0|BlastHit|gi|82182166|sp|Q6DC58.1|TM223_DANRE
10012	291	T	C	Locus_27731.0|BlastHit|gi|82182166|sp|Q6DC58.1|TM223_DANRE
10012	30	T	A	Locus_27731.0|BlastHit|gi|82182166|sp|Q6DC58.1|TM223_DANRE
10012	338	A	G	Locus_27731.0|BlastHit|gi|82182166|sp|Q6DC58.1|TM223_DANRE
10012	39	C	T	Locus_27731.0|BlastHit|gi|82182166|sp|Q6DC58.1|TM223_DANRE
10012	5	A	G	Locus_27731.0|BlastHit|gi|82182166|sp|Q6DC58.1|TM223_DANRE
10024	525	G	A	Locus_27746.0|BlastHit|gi|78103352|sp|Q9CQ56.1|USE1_MOUSE
10024	81	C	G	Locus_27746.0|BlastHit|gi|78103352|sp|Q9CQ56.1|USE1_MOUSE
10025	459	C	T	Locus_27747.0|BlastHit|gi|73921751|sp|O35691.4|PININ_MOUSE
10026	3167	G	T	Locus_27747.1|BlastHit|gi|269849764|sp|O60524.4|NEMF_HUMAN
10026	3560	A	G	Locus_27747.1|BlastHit|gi|269849764|sp|O60524.4|NEMF_HUMAN
10028	285	T	C	Locus_27751.0|BlastHit|gi|121717|sp|P04905.2|GSTM1_RAT
10028	371	T	C	Locus_27751.0|BlastHit|gi|121717|sp|P04905.2|GSTM1_RAT
10028	812	A	G	Locus_27751.0|BlastHit|gi|121717|sp|P04905.2|GSTM1_RAT
10028	820	G	A	Locus_27751.0|BlastHit|gi|121717|sp|P04905.2|GSTM1_RAT
10029	186	G	A	Locus_27752.0|BlastHit|gi|341942246|sp|Q9EQ80.4|NIF3L_MOUSE
10030	247	T	A	Locus_27753.0|BlastHit|gi|56404954|sp|Q9CQS5.1|RIOK2_MOUSE
10030	979	G	T	Locus_27753.0|BlastHit|gi|56404954|sp|Q9CQS5.1|RIOK2_MOUSE
10037	240	T	A	Locus_27762.0|BlastHit|gi|14916936|sp|Q9HYH5.1|Y3430_PSEAE
10038	102	T	C	Locus_27764.0|BlastHit|gi|21541962|sp|Q9QZU7.1|BODG_RAT
10038	1236	T	C	Locus_27764.0|BlastHit|gi|21541962|sp|Q9QZU7.1|BODG_RAT
10038	124	G	A	Locus_27764.0|BlastHit|gi|21541962|sp|Q9QZU7.1|BODG_RAT
10038	1281	C	T	Locus_27764.0|BlastHit|gi|21541962|sp|Q9QZU7.1|BODG_RAT
10038	1326	C	T	Locus_27764.0|BlastHit|gi|21541962|sp|Q9QZU7.1|BODG_RAT
10038	414	C	G	Locus_27764.0|BlastHit|gi|21541962|sp|Q9QZU7.1|BODG_RAT
10038	525	G	C	Locus_27764.0|BlastHit|gi|21541962|sp|Q9QZU7.1|BODG_RAT
10038	625	C	T	Locus_27764.0|BlastHit|gi|21541962|sp|Q9QZU7.1|BODG_RAT
10038	834	T	G	Locus_27764.0|BlastHit|gi|21541962|sp|Q9QZU7.1|BODG_RAT
10038	954	T	C	Locus_27764.0|BlastHit|gi|21541962|sp|Q9QZU7.1|BODG_RAT
10042	5647	G	A	Locus_27766.8|BlastHit|gi|166233516|sp|A6QM06.1|SCAP_BOVIN
10059	1375	A	G	Locus_27767.0|BlastHit|gi|1346566|sp|P47811.3|MK14_MOUSE
10059	1658	T	A	Locus_27767.0|BlastHit|gi|1346566|sp|P47811.3|MK14_MOUSE
10059	3446	T	C	Locus_27767.0|BlastHit|gi|1346566|sp|P47811.3|MK14_MOUSE
10059	3911	A	T	Locus_27767.0|BlastHit|gi|1346566|sp|P47811.3|MK14_MOUSE
10059	521	A	T	Locus_27767.0|BlastHit|gi|1346566|sp|P47811.3|MK14_MOUSE
10059	982	A	G	Locus_27767.0|BlastHit|gi|1346566|sp|P47811.3|MK14_MOUSE
10060	1230	A	T	Locus_27769.0|BlastHit|gi|2493525|sp|Q98943.2|CASP2_CHICK
10061	1297	T	C	Locus_27771.0|BlastHit|gi|74947746|sp|Q9VCC0.1|CHRD1_DROME
10061	1521	T	A	Locus_27771.0|BlastHit|gi|74947746|sp|Q9VCC0.1|CHRD1_DROME
10061	2106	A	G	Locus_27771.0|BlastHit|gi|74947746|sp|Q9VCC0.1|CHRD1_DROME
10061	2415	T	C	Locus_27771.0|BlastHit|gi|74947746|sp|Q9VCC0.1|CHRD1_DROME
10061	593	A	G	Locus_27771.0|BlastHit|gi|74947746|sp|Q9VCC0.1|CHRD1_DROME
10062	340	C	G	Locus_27772.0|BlastHit|gi|123928|sp|P07687.1|HYEP_RAT
10062	393	C	T	Locus_27772.0|BlastHit|gi|123928|sp|P07687.1|HYEP_RAT
10062	967	T	C	Locus_27772.0|BlastHit|gi|123928|sp|P07687.1|HYEP_RAT
10062	993	T	C	Locus_27772.0|BlastHit|gi|123928|sp|P07687.1|HYEP_RAT
10077	1066	T	C	Locus_27783.0|BlastHit|gi|20139021|sp|Q91642.1|PEPE_XENLA
10077	351	T	C	Locus_27783.0|BlastHit|gi|20139021|sp|Q91642.1|PEPE_XENLA
10077	366	G	A	Locus_27783.0|BlastHit|gi|20139021|sp|Q91642.1|PEPE_XENLA
10077	654	A	T	Locus_27783.0|BlastHit|gi|20139021|sp|Q91642.1|PEPE_XENLA
10077	785	C	G	Locus_27783.0|BlastHit|gi|20139021|sp|Q91642.1|PEPE_XENLA
10077	798	A	C,T	Locus_27783.0|BlastHit|gi|20139021|sp|Q91642.1|PEPE_XENLA
10077	838	A	T	Locus_27783.0|BlastHit|gi|20139021|sp|Q91642.1|PEPE_XENLA
10079	1004	C	T	Locus_27785.1|BlastHit|gi|6015057|sp|Q92005.1|EF1A_DANRE
10079	1019	C	T	Locus_27785.1|BlastHit|gi|6015057|sp|Q92005.1|EF1A_DANRE
10079	454	C	T	Locus_27785.1|BlastHit|gi|6015057|sp|Q92005.1|EF1A_DANRE
10079	455	T	C	Locus_27785.1|BlastHit|gi|6015057|sp|Q92005.1|EF1A_DANRE
10079	461	C	T	Locus_27785.1|BlastHit|gi|6015057|sp|Q92005.1|EF1A_DANRE
10079	462	A	T	Locus_27785.1|BlastHit|gi|6015057|sp|Q92005.1|EF1A_DANRE
10079	463	A	C	Locus_27785.1|BlastHit|gi|6015057|sp|Q92005.1|EF1A_DANRE
10079	647	C	T	Locus_27785.1|BlastHit|gi|6015057|sp|Q92005.1|EF1A_DANRE
10081	118	C	T	Locus_27788.0|BlastHit|gi|122138726|sp|Q32L83.1|BRI3_BOVIN
10081	496	C	T	Locus_27788.0|BlastHit|gi|122138726|sp|Q32L83.1|BRI3_BOVIN
10081	729	G	A	Locus_27788.0|BlastHit|gi|122138726|sp|Q32L83.1|BRI3_BOVIN
10082	1273	C	T	Locus_27789.0|BlastHit|gi|74744614|sp|Q5T2E6.1|CJ076_HUMAN
10084	2390	G	T	Locus_27792.0|BlastHit|gi|92090990|sp|Q9H1I8.3|ASCC2_HUMAN
10084	385	C	T	Locus_27792.0|BlastHit|gi|92090990|sp|Q9H1I8.3|ASCC2_HUMAN
10086	269	C	T	Locus_27795.0|BlastHit|gi|74866454|sp|Q95SS8.1|TMM70_DROME
10086	527	C	T	Locus_27795.0|BlastHit|gi|74866454|sp|Q95SS8.1|TMM70_DROME
10086	539	G	A	Locus_27795.0|BlastHit|gi|74866454|sp|Q95SS8.1|TMM70_DROME
10086	548	C	T	Locus_27795.0|BlastHit|gi|74866454|sp|Q95SS8.1|TMM70_DROME
10086	779	G	A	Locus_27795.0|BlastHit|gi|74866454|sp|Q95SS8.1|TMM70_DROME
10086	790	C	A	Locus_27795.0|BlastHit|gi|74866454|sp|Q95SS8.1|TMM70_DROME
10086	932	G	T	Locus_27795.0|BlastHit|gi|74866454|sp|Q95SS8.1|TMM70_DROME
10087	109	C	T,A	Locus_27796.0|BlastHit|gi|263504738|sp|A6QLE5.1|NALP3_BOVIN
10087	205	G	T	Locus_27796.0|BlastHit|gi|263504738|sp|A6QLE5.1|NALP3_BOVIN
10087	324	A	G	Locus_27796.0|BlastHit|gi|263504738|sp|A6QLE5.1|NALP3_BOVIN
10087	391	G	A	Locus_27796.0|BlastHit|gi|263504738|sp|A6QLE5.1|NALP3_BOVIN
10087	403	T	C	Locus_27796.0|BlastHit|gi|263504738|sp|A6QLE5.1|NALP3_BOVIN
10087	628	C	T	Locus_27796.0|BlastHit|gi|263504738|sp|A6QLE5.1|NALP3_BOVIN
10090	1135	T	G	Locus_27800.1|BlastHit|gi|215275614|sp|Q63625.2|PHRF1_RAT
10097	309	G	T	Locus_27803.0|BlastHit|gi|158563899|sp|Q5U201.2|AMN1_RAT
10098	2264	C	G	Locus_27804.0|BlastHit|gi|81899710|sp|Q8CBH5.1|MFSD6_MOUSE
10098	2315	G	C	Locus_27804.0|BlastHit|gi|81899710|sp|Q8CBH5.1|MFSD6_MOUSE
10098	2414	G	A	Locus_27804.0|BlastHit|gi|81899710|sp|Q8CBH5.1|MFSD6_MOUSE
10098	2813	C	T	Locus_27804.0|BlastHit|gi|81899710|sp|Q8CBH5.1|MFSD6_MOUSE
10098	933	G	A	Locus_27804.0|BlastHit|gi|81899710|sp|Q8CBH5.1|MFSD6_MOUSE
10099	464	C	T	Locus_27805.0|BlastHit|gi|136424|sp|P00765.1|TRYP_ASTFL
10099	541	A	T	Locus_27805.0|BlastHit|gi|136424|sp|P00765.1|TRYP_ASTFL
10103	1028	G	A	Locus_27809.0|BlastHit|gi|75070594|sp|Q5R7N3.1|CLPX_PONAB
10103	1593	A	G	Locus_27809.0|BlastHit|gi|75070594|sp|Q5R7N3.1|CLPX_PONAB
10103	1605	C	T	Locus_27809.0|BlastHit|gi|75070594|sp|Q5R7N3.1|CLPX_PONAB
10106	1074	T	C	Locus_27812.0|BlastHit|gi|302393789|sp|P62972.2|UBIQP_XENLA
10106	652	G	A	Locus_27812.0|BlastHit|gi|302393789|sp|P62972.2|UBIQP_XENLA
10106	716	T	A	Locus_27812.0|BlastHit|gi|302393789|sp|P62972.2|UBIQP_XENLA
10114	107	G	A	Locus_27819.0|BlastHit|gi|81906067|sp|Q9DB60.1|PGFS_MOUSE
10114	1681	T	C	Locus_27819.0|BlastHit|gi|81906067|sp|Q9DB60.1|PGFS_MOUSE
10114	187	A	C	Locus_27819.0|BlastHit|gi|81906067|sp|Q9DB60.1|PGFS_MOUSE
10114	296	A	T	Locus_27819.0|BlastHit|gi|81906067|sp|Q9DB60.1|PGFS_MOUSE
10114	341	T	C	Locus_27819.0|BlastHit|gi|81906067|sp|Q9DB60.1|PGFS_MOUSE
10114	401	G	A	Locus_27819.0|BlastHit|gi|81906067|sp|Q9DB60.1|PGFS_MOUSE
10114	476	C	T	Locus_27819.0|BlastHit|gi|81906067|sp|Q9DB60.1|PGFS_MOUSE
10114	508	C	G	Locus_27819.0|BlastHit|gi|81906067|sp|Q9DB60.1|PGFS_MOUSE
10114	524	C	T	Locus_27819.0|BlastHit|gi|81906067|sp|Q9DB60.1|PGFS_MOUSE
10124	1044	C	T	Locus_27824.0|BlastHit|gi|47117211|sp|Q86Y82.1|STX12_HUMAN
10124	230	A	G	Locus_27824.0|BlastHit|gi|47117211|sp|Q86Y82.1|STX12_HUMAN
10124	2409	G	A	Locus_27824.0|BlastHit|gi|47117211|sp|Q86Y82.1|STX12_HUMAN
10124	598	C	A	Locus_27824.0|BlastHit|gi|47117211|sp|Q86Y82.1|STX12_HUMAN
10124	607	T	C	Locus_27824.0|BlastHit|gi|47117211|sp|Q86Y82.1|STX12_HUMAN
10130	1012	C	T	Locus_27829.0|BlastHit|gi|10720060|sp|Q9XYN1.1|INX2_SCHAM
10131	1304	G	A	Locus_27830.0|BlastHit|gi|20138067|sp|Q9UHB6.1|LIMA1_HUMAN
10131	2138	T	C	Locus_27830.0|BlastHit|gi|20138067|sp|Q9UHB6.1|LIMA1_HUMAN
10131	3099	T	A	Locus_27830.0|BlastHit|gi|20138067|sp|Q9UHB6.1|LIMA1_HUMAN
10131	561	C	T	Locus_27830.0|BlastHit|gi|20138067|sp|Q9UHB6.1|LIMA1_HUMAN
10132	1436	C	T	Locus_27831.0|BlastHit|gi|81170644|sp|Q6DCX5.1|PCFT_XENLA
10144	553	C	T	Locus_27833.0|BlastHit|gi|136424|sp|P00765.1|TRYP_ASTFL
10144	556	G	C	Locus_27833.0|BlastHit|gi|136424|sp|P00765.1|TRYP_ASTFL
10144	916	C	T	Locus_27833.0|BlastHit|gi|136424|sp|P00765.1|TRYP_ASTFL
10146	1624	T	A	Locus_27837.0|BlastHit|gi|109825481|sp|Q29S22.1|DDX47_BOVIN
10147	814	T	C	Locus_27838.0|BlastHit|gi|3182992|sp|P79345.1|NPC2_BOVIN
10149	3176	T	A	Locus_27840.0|BlastHit|gi|52782794|sp|Q9NUQ9.1|FA49B_HUMAN
10149	3842	G	A	Locus_27840.0|BlastHit|gi|52782794|sp|Q9NUQ9.1|FA49B_HUMAN
10154	1916	A	G	Locus_27844.0|BlastHit|gi|294862502|sp|Q96QE2.3|MYCT_HUMAN
10154	1926	A	T	Locus_27844.0|BlastHit|gi|294862502|sp|Q96QE2.3|MYCT_HUMAN
10154	211	T	A	Locus_27844.0|BlastHit|gi|294862502|sp|Q96QE2.3|MYCT_HUMAN
10154	477	G	A	Locus_27844.0|BlastHit|gi|294862502|sp|Q96QE2.3|MYCT_HUMAN
10154	492	T	C	Locus_27844.0|BlastHit|gi|294862502|sp|Q96QE2.3|MYCT_HUMAN
10155	1111	A	G	Locus_27847.0|BlastHit|gi|75536771|sp|Q4UMH6.1|Y381_RICFE
10155	1298	G	A	Locus_27847.0|BlastHit|gi|75536771|sp|Q4UMH6.1|Y381_RICFE
10155	460	A	G	Locus_27847.0|BlastHit|gi|75536771|sp|Q4UMH6.1|Y381_RICFE
10156	1569	G	A	Locus_27848.0|BlastHit|gi|81916424|sp|Q924S5.1|LONM_RAT
10156	2517	T	C	Locus_27848.0|BlastHit|gi|81916424|sp|Q924S5.1|LONM_RAT
10156	852	C	T	Locus_27848.0|BlastHit|gi|81916424|sp|Q924S5.1|LONM_RAT
10156	858	C	T	Locus_27848.0|BlastHit|gi|81916424|sp|Q924S5.1|LONM_RAT
10156	969	T	G	Locus_27848.0|BlastHit|gi|81916424|sp|Q924S5.1|LONM_RAT
10166	2333	A	G	Locus_27856.0|BlastHit|gi|82120124|sp|Q9W704.1|RIPA_XENLA
10167	501	A	T	Locus_27859.0|BlastHit|gi|306531055|sp|D4A1J4.2|BDH2_RAT
10167	792	T	C	Locus_27859.0|BlastHit|gi|306531055|sp|D4A1J4.2|BDH2_RAT
10167	858	C	A	Locus_27859.0|BlastHit|gi|306531055|sp|D4A1J4.2|BDH2_RAT
10168	1001	G	C	Locus_27864.0|BlastHit|gi|387942487|sp|F7E235.1|FAXC_XENTR
10168	164	T	G	Locus_27864.0|BlastHit|gi|387942487|sp|F7E235.1|FAXC_XENTR
10169	59	C	A	Locus_27866.1|BlastHit|gi|28380062|sp|Q9VXK6.1|IF5_DROME
10170	1173	A	G	Locus_27867.0|BlastHit|gi|55584077|sp|O02776.1|PARG_BOVIN
10170	1565	A	G	Locus_27867.0|BlastHit|gi|55584077|sp|O02776.1|PARG_BOVIN
10170	1595	A	G	Locus_27867.0|BlastHit|gi|55584077|sp|O02776.1|PARG_BOVIN
10170	680	A	G	Locus_27867.0|BlastHit|gi|55584077|sp|O02776.1|PARG_BOVIN
10172	600	G	A	Locus_27869.0|BlastHit|gi|229891120|sp|B6MUN4.1|MYSM1_BRAFL
10173	416	T	A,C	Locus_27870.0|BlastHit|gi|74942758|sp|Q9I7S8.2|PUR6_DROME
10173	764	A	C	Locus_27870.0|BlastHit|gi|74942758|sp|Q9I7S8.2|PUR6_DROME
10173	932	T	G	Locus_27870.0|BlastHit|gi|74942758|sp|Q9I7S8.2|PUR6_DROME
10173	953	C	T	Locus_27870.0|BlastHit|gi|74942758|sp|Q9I7S8.2|PUR6_DROME
10174	1522	A	T	Locus_27873.0|BlastHit|gi|81910905|sp|Q6AYY8.1|ACATN_RAT
10176	1486	G	A	Locus_27874.0|BlastHit|gi|341942023|sp|Q9JHW4.2|SELB_MOUSE
10179	104	T	C	Locus_27878.0|BlastHit|gi|2506384|sp|P26221.2|GUN4_THEFU
10179	1753	G	A,C	Locus_27878.0|BlastHit|gi|2506384|sp|P26221.2|GUN4_THEFU
10179	1791	G	A	Locus_27878.0|BlastHit|gi|2506384|sp|P26221.2|GUN4_THEFU
10179	1833	A	G	Locus_27878.0|BlastHit|gi|2506384|sp|P26221.2|GUN4_THEFU
10179	19	T	C	Locus_27878.0|BlastHit|gi|2506384|sp|P26221.2|GUN4_THEFU
10179	421	T	C	Locus_27878.0|BlastHit|gi|2506384|sp|P26221.2|GUN4_THEFU
10179	763	A	T,G	Locus_27878.0|BlastHit|gi|2506384|sp|P26221.2|GUN4_THEFU
10183	12	G	A	Locus_27885.0|BlastHit|gi|93141310|sp|Q12981.3|SEC20_HUMAN
10183	2254	G	T	Locus_27885.0|BlastHit|gi|93141310|sp|Q12981.3|SEC20_HUMAN
10183	2300	G	A	Locus_27885.0|BlastHit|gi|93141310|sp|Q12981.3|SEC20_HUMAN
10183	2423	A	T	Locus_27885.0|BlastHit|gi|93141310|sp|Q12981.3|SEC20_HUMAN
10183	3166	G	A	Locus_27885.0|BlastHit|gi|93141310|sp|Q12981.3|SEC20_HUMAN
10183	3273	T	A	Locus_27885.0|BlastHit|gi|93141310|sp|Q12981.3|SEC20_HUMAN
10183	3274	G	A	Locus_27885.0|BlastHit|gi|93141310|sp|Q12981.3|SEC20_HUMAN
10183	8	A	G	Locus_27885.0|BlastHit|gi|93141310|sp|Q12981.3|SEC20_HUMAN
10189	1057	C	G	Locus_27886.0|BlastHit|gi|22256976|sp|Q96I34.1|PP16A_HUMAN
10189	117	T	C	Locus_27886.0|BlastHit|gi|22256976|sp|Q96I34.1|PP16A_HUMAN
10189	1335	C	T	Locus_27886.0|BlastHit|gi|22256976|sp|Q96I34.1|PP16A_HUMAN
10189	140	A	G	Locus_27886.0|BlastHit|gi|22256976|sp|Q96I34.1|PP16A_HUMAN
10189	1568	T	C	Locus_27886.0|BlastHit|gi|22256976|sp|Q96I34.1|PP16A_HUMAN
10189	1896	T	C	Locus_27886.0|BlastHit|gi|22256976|sp|Q96I34.1|PP16A_HUMAN
10189	224	G	A	Locus_27886.0|BlastHit|gi|22256976|sp|Q96I34.1|PP16A_HUMAN
10189	2244	T	C	Locus_27886.0|BlastHit|gi|22256976|sp|Q96I34.1|PP16A_HUMAN
10189	226	A	G	Locus_27886.0|BlastHit|gi|22256976|sp|Q96I34.1|PP16A_HUMAN
10190	3228	A	C	Locus_27888.0|BlastHit|gi|342187160|sp|Q6P5E4.4|UGGG1_MOUSE
10190	3474	T	C	Locus_27888.0|BlastHit|gi|342187160|sp|Q6P5E4.4|UGGG1_MOUSE
10190	4106	C	T	Locus_27888.0|BlastHit|gi|342187160|sp|Q6P5E4.4|UGGG1_MOUSE
10193	898	T	C	Locus_27892.0|BlastHit|gi|24418715|sp|Q8WYN3.1|CSRN3_HUMAN
10194	1199	C	G	Locus_27893.0|BlastHit|gi|544256|sp|P35502.1|ESTF_MYZPE
10196	3334	A	G	Locus_27898.0|BlastHit|gi|205829471|sp|A5PJ93.1|PERP1_BOVIN
10204	2678	A	G	Locus_27903.0|BlastHit|gi|2495109|sp|Q64471.3|GSTT1_MOUSE
10204	2879	G	A	Locus_27903.0|BlastHit|gi|2495109|sp|Q64471.3|GSTT1_MOUSE
10204	3065	G	A	Locus_27903.0|BlastHit|gi|2495109|sp|Q64471.3|GSTT1_MOUSE
10204	3356	A	C	Locus_27903.0|BlastHit|gi|2495109|sp|Q64471.3|GSTT1_MOUSE
10208	722	G	A	Locus_27906.0|BlastHit|gi|229470204|sp|B0W2W6.1|MAEL_CULQU
10209	1126	G	A	Locus_27909.0|BlastHit|gi|122140235|sp|Q3SZJ4.1|PTGR1_BOVIN
10209	1276	C	A	Locus_27909.0|BlastHit|gi|122140235|sp|Q3SZJ4.1|PTGR1_BOVIN
10213	291	T	A	Locus_27912.0|BlastHit|gi|464320|sp|P34714.1|SPRC_CAEEL
10213	339	G	T	Locus_27912.0|BlastHit|gi|464320|sp|P34714.1|SPRC_CAEEL
10213	946	C	T	Locus_27912.0|BlastHit|gi|464320|sp|P34714.1|SPRC_CAEEL
1021	1096	C	T	Locus_7597.0|BlastHit|gi|119368343|sp|Q2TBJ0.1|CL045_BOVIN
10222	1205	G	A	Locus_27923.0|BlastHit|gi|20141376|sp|P40939.2|ECHA_HUMAN
10222	2476	A	G	Locus_27923.0|BlastHit|gi|20141376|sp|P40939.2|ECHA_HUMAN
10222	369	G	A	Locus_27923.0|BlastHit|gi|20141376|sp|P40939.2|ECHA_HUMAN
10222	469	A	T	Locus_27923.0|BlastHit|gi|20141376|sp|P40939.2|ECHA_HUMAN
10222	571	C	T	Locus_27923.0|BlastHit|gi|20141376|sp|P40939.2|ECHA_HUMAN
10222	857	G	T	Locus_27923.0|BlastHit|gi|20141376|sp|P40939.2|ECHA_HUMAN
10224	1407	C	T	Locus_27924.0|BlastHit|gi|82081646|sp|Q5ZJI9.1|UBAC1_CHICK
10224	2742	A	T	Locus_27924.0|BlastHit|gi|82081646|sp|Q5ZJI9.1|UBAC1_CHICK
10229	220	G	A	Locus_27928.0|BlastHit|gi|75027992|sp|Q9W534.2|MOODY_DROME
10230	106	A	G	Locus_27929.0|BlastHit|gi|110278902|sp|Q99MB4.2|CBWD1_RAT
10230	1129	C	A	Locus_27929.0|BlastHit|gi|110278902|sp|Q99MB4.2|CBWD1_RAT
10230	1135	G	A	Locus_27929.0|BlastHit|gi|110278902|sp|Q99MB4.2|CBWD1_RAT
10230	121	T	C	Locus_27929.0|BlastHit|gi|110278902|sp|Q99MB4.2|CBWD1_RAT
10230	96	A	G	Locus_27929.0|BlastHit|gi|110278902|sp|Q99MB4.2|CBWD1_RAT
10235	1323	G	A	Locus_27932.0|BlastHit|gi|84029495|sp|Q6ZPY2.2|SMG5_MOUSE
10235	1689	C	T	Locus_27932.0|BlastHit|gi|84029495|sp|Q6ZPY2.2|SMG5_MOUSE
10235	1998	G	A	Locus_27932.0|BlastHit|gi|84029495|sp|Q6ZPY2.2|SMG5_MOUSE
10235	2292	C	T	Locus_27932.0|BlastHit|gi|84029495|sp|Q6ZPY2.2|SMG5_MOUSE
10235	252	G	A	Locus_27932.0|BlastHit|gi|84029495|sp|Q6ZPY2.2|SMG5_MOUSE
10235	2568	A	G	Locus_27932.0|BlastHit|gi|84029495|sp|Q6ZPY2.2|SMG5_MOUSE
10235	2841	A	G	Locus_27932.0|BlastHit|gi|84029495|sp|Q6ZPY2.2|SMG5_MOUSE
10235	3222	A	G	Locus_27932.0|BlastHit|gi|84029495|sp|Q6ZPY2.2|SMG5_MOUSE
10235	3645	A	G	Locus_27932.0|BlastHit|gi|84029495|sp|Q6ZPY2.2|SMG5_MOUSE
10235	892	G	A	Locus_27932.0|BlastHit|gi|84029495|sp|Q6ZPY2.2|SMG5_MOUSE
10239	1441	C	T	Locus_27940.0|BlastHit|gi|13431578|sp|Q9Y573.1|IPP_HUMAN
10241	1014	A	G	Locus_27944.0|BlastHit|gi|1351430|sp|P49338.1|WNT4_XENLA
10241	2198	A	G	Locus_27944.0|BlastHit|gi|1351430|sp|P49338.1|WNT4_XENLA
10242	60	A	T	Locus_27945.0|BlastHit|gi|75045923|sp|Q7YRA3.3|EXOS4_BOVIN
10242	66	G	A	Locus_27945.0|BlastHit|gi|75045923|sp|Q7YRA3.3|EXOS4_BOVIN
10242	721	C	T	Locus_27945.0|BlastHit|gi|75045923|sp|Q7YRA3.3|EXOS4_BOVIN
10248	1178	A	C	Locus_27952.0|BlastHit|gi|82188244|sp|Q7T3C6.1|CPSF5_DANRE
10248	1424	A	G	Locus_27952.0|BlastHit|gi|82188244|sp|Q7T3C6.1|CPSF5_DANRE
10254	1071	T	C	Locus_27960.0|BlastHit|gi|74748828|sp|Q6IQ49.1|CA055_HUMAN
10254	1510	C	T	Locus_27960.0|BlastHit|gi|74748828|sp|Q6IQ49.1|CA055_HUMAN
10254	854	C	T	Locus_27960.0|BlastHit|gi|74748828|sp|Q6IQ49.1|CA055_HUMAN
10259	100	A	T	Locus_27965.0|BlastHit|gi|122140411|sp|Q3T0V9.1|DEOC_BOVIN
10259	1006	G	A	Locus_27965.0|BlastHit|gi|122140411|sp|Q3T0V9.1|DEOC_BOVIN
10259	244	A	G	Locus_27965.0|BlastHit|gi|122140411|sp|Q3T0V9.1|DEOC_BOVIN
10259	283	C	T	Locus_27965.0|BlastHit|gi|122140411|sp|Q3T0V9.1|DEOC_BOVIN
10259	532	C	T	Locus_27965.0|BlastHit|gi|122140411|sp|Q3T0V9.1|DEOC_BOVIN
10259	559	A	T	Locus_27965.0|BlastHit|gi|122140411|sp|Q3T0V9.1|DEOC_BOVIN
10259	687	G	T	Locus_27965.0|BlastHit|gi|122140411|sp|Q3T0V9.1|DEOC_BOVIN
10259	715	C	T	Locus_27965.0|BlastHit|gi|122140411|sp|Q3T0V9.1|DEOC_BOVIN
10259	721	C	G	Locus_27965.0|BlastHit|gi|122140411|sp|Q3T0V9.1|DEOC_BOVIN
10259	802	T	G	Locus_27965.0|BlastHit|gi|122140411|sp|Q3T0V9.1|DEOC_BOVIN
10259	889	C	G	Locus_27965.0|BlastHit|gi|122140411|sp|Q3T0V9.1|DEOC_BOVIN
10259	958	A	G	Locus_27965.0|BlastHit|gi|122140411|sp|Q3T0V9.1|DEOC_BOVIN
10261	116	C	T	Locus_27968.0|BlastHit|gi|21362539|sp|Q9V9Z9.1|EBP2_DROME
10261	434	G	A	Locus_27968.0|BlastHit|gi|21362539|sp|Q9V9Z9.1|EBP2_DROME
10261	650	A	T	Locus_27968.0|BlastHit|gi|21362539|sp|Q9V9Z9.1|EBP2_DROME
10261	716	T	C	Locus_27968.0|BlastHit|gi|21362539|sp|Q9V9Z9.1|EBP2_DROME
10262	914	C	T	Locus_27969.0|BlastHit|gi|109919868|sp|P79098.4|AMPN_BOVIN
10267	983	C	T	Locus_27978.0|BlastHit|gi|82179586|sp|Q5PPS7.1|TM53A_XENLA
10268	107	C	A	Locus_27978.1|BlastHit|gi|134047806|sp|Q99828.4|CIB1_HUMAN
10268	139	C	A	Locus_27978.1|BlastHit|gi|134047806|sp|Q99828.4|CIB1_HUMAN
10268	167	G	C	Locus_27978.1|BlastHit|gi|134047806|sp|Q99828.4|CIB1_HUMAN
10268	327	C	A	Locus_27978.1|BlastHit|gi|134047806|sp|Q99828.4|CIB1_HUMAN
10268	642	G	A	Locus_27978.1|BlastHit|gi|134047806|sp|Q99828.4|CIB1_HUMAN
10268	791	A	G	Locus_27978.1|BlastHit|gi|134047806|sp|Q99828.4|CIB1_HUMAN
10268	811	T	A	Locus_27978.1|BlastHit|gi|134047806|sp|Q99828.4|CIB1_HUMAN
10268	93	A	G	Locus_27978.1|BlastHit|gi|134047806|sp|Q99828.4|CIB1_HUMAN
10271	2082	G	A	Locus_27981.0|BlastHit|gi|189046187|sp|Q1EHB4.2|SC5AC_HUMAN
10271	2330	G	C	Locus_27981.0|BlastHit|gi|189046187|sp|Q1EHB4.2|SC5AC_HUMAN
10271	543	G	A	Locus_27981.0|BlastHit|gi|189046187|sp|Q1EHB4.2|SC5AC_HUMAN
10271	595	G	C	Locus_27981.0|BlastHit|gi|189046187|sp|Q1EHB4.2|SC5AC_HUMAN
10290	1045	A	G	Locus_27989.0|BlastHit|gi|34223744|sp|Q9VCR7.2|CTNS_DROME
10290	333	A	C	Locus_27989.0|BlastHit|gi|34223744|sp|Q9VCR7.2|CTNS_DROME
10292	3112	C	T	Locus_27992.0|BlastHit|gi|20141021|sp|Q99JY4.1|TRABD_MOUSE
10292	3396	C	T	Locus_27992.0|BlastHit|gi|20141021|sp|Q99JY4.1|TRABD_MOUSE
10295	1420	T	C	Locus_27997.0|BlastHit|gi|82239825|sp|Q75WS4.1|CRYD_XENLA
10297	66	T	C	Locus_28006.0|BlastHit|gi|123668|sp|P11501.3|HS90A_CHICK
10297	758	T	G	Locus_28006.0|BlastHit|gi|123668|sp|P11501.3|HS90A_CHICK
10297	769	C	T	Locus_28006.0|BlastHit|gi|123668|sp|P11501.3|HS90A_CHICK
1029	889	T	C	Locus_7633.0|BlastHit|gi|2506888|sp|P50538.2|MAD1_MOUSE
10304	1079	C	T	Locus_28014.0|BlastHit|gi|109892506|sp|Q3ZBF8.1|CERS2_BOVIN
10304	290	G	A	Locus_28014.0|BlastHit|gi|109892506|sp|Q3ZBF8.1|CERS2_BOVIN
10304	686	C	A	Locus_28014.0|BlastHit|gi|109892506|sp|Q3ZBF8.1|CERS2_BOVIN
10304	926	A	G	Locus_28014.0|BlastHit|gi|109892506|sp|Q3ZBF8.1|CERS2_BOVIN
10306	1134	T	G	Locus_28017.0|BlastHit|gi|114150035|sp|Q28C88.1|MOGT1_XENTR
10306	1485	A	G	Locus_28017.0|BlastHit|gi|114150035|sp|Q28C88.1|MOGT1_XENTR
10307	1649	T	C	Locus_28017.3|BlastHit|gi|341940613|sp|P28271.3|ACOC_MOUSE
10307	175	C	T	Locus_28017.3|BlastHit|gi|341940613|sp|P28271.3|ACOC_MOUSE
10307	2109	C	T	Locus_28017.3|BlastHit|gi|341940613|sp|P28271.3|ACOC_MOUSE
10307	2201	C	T,A	Locus_28017.3|BlastHit|gi|341940613|sp|P28271.3|ACOC_MOUSE
10307	3354	G	A	Locus_28017.3|BlastHit|gi|341940613|sp|P28271.3|ACOC_MOUSE
10308	1815	A	G	Locus_28018.0|BlastHit|gi|37999779|sp|Q9CZE3.3|RAB32_MOUSE
10311	1305	T	C	Locus_28021.0|BlastHit|gi|51316507|sp|Q924Z4.1|CERS2_MOUSE
10311	1388	A	G	Locus_28021.0|BlastHit|gi|51316507|sp|Q924Z4.1|CERS2_MOUSE
10311	1480	C	A	Locus_28021.0|BlastHit|gi|51316507|sp|Q924Z4.1|CERS2_MOUSE
10311	360	G	A	Locus_28021.0|BlastHit|gi|51316507|sp|Q924Z4.1|CERS2_MOUSE
10316	1269	C	T	Locus_28027.0|BlastHit|gi|29839592|sp|Q90673.1|PRLD1_CHICK
10316	134	A	T	Locus_28027.0|BlastHit|gi|29839592|sp|Q90673.1|PRLD1_CHICK
10316	1552	G	A	Locus_28027.0|BlastHit|gi|29839592|sp|Q90673.1|PRLD1_CHICK
10316	1932	G	T	Locus_28027.0|BlastHit|gi|29839592|sp|Q90673.1|PRLD1_CHICK
10316	2031	C	T	Locus_28027.0|BlastHit|gi|29839592|sp|Q90673.1|PRLD1_CHICK
10316	2088	T	G	Locus_28027.0|BlastHit|gi|29839592|sp|Q90673.1|PRLD1_CHICK
10316	2888	T	C	Locus_28027.0|BlastHit|gi|29839592|sp|Q90673.1|PRLD1_CHICK
10316	3308	A	G	Locus_28027.0|BlastHit|gi|29839592|sp|Q90673.1|PRLD1_CHICK
10316	3448	G	A	Locus_28027.0|BlastHit|gi|29839592|sp|Q90673.1|PRLD1_CHICK
10316	3514	A	C	Locus_28027.0|BlastHit|gi|29839592|sp|Q90673.1|PRLD1_CHICK
10316	3528	A	G	Locus_28027.0|BlastHit|gi|29839592|sp|Q90673.1|PRLD1_CHICK
10319	1486	C	A,T	Locus_28032.0|BlastHit|gi|62901525|sp|Q94900.2|GLUCL_DROME
10322	4172	T	A	Locus_28036.0|BlastHit|gi|88909230|sp|Q7Z401.2|MYCPP_HUMAN
10325	35	A	G	Locus_28039.0|BlastHit|gi|141653|sp|P18729.1|ZG57_XENLA
10325	49	A	T	Locus_28039.0|BlastHit|gi|141653|sp|P18729.1|ZG57_XENLA
10326	727	G	A	Locus_28040.0|BlastHit|gi|57015283|sp|O55102.2|BL1S1_MOUSE
10355	84	G	T	Locus_28042.0|BlastHit|gi|85701141|sp|Q3THS6.2|METK2_MOUSE
10357	248	T	G	Locus_28045.0|BlastHit|gi|85542188|sp|Q7SY23.1|AL4A1_DANRE
10357	3183	C	T	Locus_28045.0|BlastHit|gi|85542188|sp|Q7SY23.1|AL4A1_DANRE
10367	1150	T	C	Locus_28053.0|BlastHit|gi|6136677|sp|O02485.1|YDJ1_CAEEL
10367	1331	G	A	Locus_28053.0|BlastHit|gi|6136677|sp|O02485.1|YDJ1_CAEEL
10367	1607	G	A	Locus_28053.0|BlastHit|gi|6136677|sp|O02485.1|YDJ1_CAEEL
10367	215	T	G	Locus_28053.0|BlastHit|gi|6136677|sp|O02485.1|YDJ1_CAEEL
10367	2168	C	G	Locus_28053.0|BlastHit|gi|6136677|sp|O02485.1|YDJ1_CAEEL
10367	220	T	G	Locus_28053.0|BlastHit|gi|6136677|sp|O02485.1|YDJ1_CAEEL
10367	221	T	G,C	Locus_28053.0|BlastHit|gi|6136677|sp|O02485.1|YDJ1_CAEEL
10367	2429	T	A	Locus_28053.0|BlastHit|gi|6136677|sp|O02485.1|YDJ1_CAEEL
10367	2516	G	C	Locus_28053.0|BlastHit|gi|6136677|sp|O02485.1|YDJ1_CAEEL
10367	2798	A	G	Locus_28053.0|BlastHit|gi|6136677|sp|O02485.1|YDJ1_CAEEL
10367	2801	A	G	Locus_28053.0|BlastHit|gi|6136677|sp|O02485.1|YDJ1_CAEEL
10367	573	C	A	Locus_28053.0|BlastHit|gi|6136677|sp|O02485.1|YDJ1_CAEEL
10368	1292	G	A	Locus_28055.0|BlastHit|gi|123910179|sp|Q28C74.1|LPPRC_XENTR
10368	640	T	C	Locus_28055.0|BlastHit|gi|123910179|sp|Q28C74.1|LPPRC_XENTR
10368	766	T	C	Locus_28055.0|BlastHit|gi|123910179|sp|Q28C74.1|LPPRC_XENTR
10369	9621	C	T	Locus_28056.0|BlastHit|gi|73920223|sp|P16621.2|LAR_DROME
10372	1698	A	C	Locus_28058.0|BlastHit|gi|378548406|sp|G5E8K6.1|MOT6_MOUSE
10372	1842	T	C	Locus_28058.0|BlastHit|gi|378548406|sp|G5E8K6.1|MOT6_MOUSE
10375	1414	A	G,C	Locus_28062.0|BlastHit|gi|20981679|sp|P52209.3|6PGD_HUMAN
10375	1459	G	T	Locus_28062.0|BlastHit|gi|20981679|sp|P52209.3|6PGD_HUMAN
10375	1660	T	C	Locus_28062.0|BlastHit|gi|20981679|sp|P52209.3|6PGD_HUMAN
10375	1741	G	A	Locus_28062.0|BlastHit|gi|20981679|sp|P52209.3|6PGD_HUMAN
10375	321	C	A	Locus_28062.0|BlastHit|gi|20981679|sp|P52209.3|6PGD_HUMAN
10375	717	C	T	Locus_28062.0|BlastHit|gi|20981679|sp|P52209.3|6PGD_HUMAN
10377	218	G	A,C	Locus_28065.0|BlastHit|gi|131863|sp|P04388.2|RAS2_DROME
10377	2336	G	T	Locus_28065.0|BlastHit|gi|131863|sp|P04388.2|RAS2_DROME
1037	22	C	G	Locus_7671.0|BlastHit|gi|113228|sp|P04751.1|ACTC_XENLA
1037	30	T	G	Locus_7671.0|BlastHit|gi|113228|sp|P04751.1|ACTC_XENLA
1037	31	T	C,A	Locus_7671.0|BlastHit|gi|113228|sp|P04751.1|ACTC_XENLA
1038	540	T	A	Locus_7672.0|BlastHit|gi|22001928|sp|Q9V9Z1.1|RM32_DROME
10407	2032	C	T	Locus_28082.0|BlastHit|gi|12230773|sp|Q9UNX4.1|WDR3_HUMAN
10408	358	T	A,C	Locus_28083.0|BlastHit|gi|6225842|sp|O73888.3|HPGDS_CHICK
10408	605	C	T	Locus_28083.0|BlastHit|gi|6225842|sp|O73888.3|HPGDS_CHICK
10408	938	C	A	Locus_28083.0|BlastHit|gi|6225842|sp|O73888.3|HPGDS_CHICK
10409	105	G	C	Locus_28086.0|BlastHit|gi|338817662|sp|C0KJQ4.2|ALPS_PORTR
10409	24	T	G	Locus_28086.0|BlastHit|gi|338817662|sp|C0KJQ4.2|ALPS_PORTR
10410	2011	C	T	Locus_28088.0|BlastHit|gi|2851658|sp|P32138.3|YIHQ_ECOLI
10410	585	C	G	Locus_28088.0|BlastHit|gi|2851658|sp|P32138.3|YIHQ_ECOLI
10410	723	C	T	Locus_28088.0|BlastHit|gi|2851658|sp|P32138.3|YIHQ_ECOLI
10415	654	G	C	Locus_28094.0|BlastHit|gi|13124102|sp|Q9VA73.1|CMC_DROME
10416	177	C	T	Locus_28095.0|BlastHit|gi|20139178|sp|Q9HBI1.1|PARVB_HUMAN
10416	22	A	T	Locus_28095.0|BlastHit|gi|20139178|sp|Q9HBI1.1|PARVB_HUMAN
10416	225	C	T	Locus_28095.0|BlastHit|gi|20139178|sp|Q9HBI1.1|PARVB_HUMAN
10416	367	G	C	Locus_28095.0|BlastHit|gi|20139178|sp|Q9HBI1.1|PARVB_HUMAN
10416	483	C	A	Locus_28095.0|BlastHit|gi|20139178|sp|Q9HBI1.1|PARVB_HUMAN
10416	489	A	T	Locus_28095.0|BlastHit|gi|20139178|sp|Q9HBI1.1|PARVB_HUMAN
10416	546	A	G	Locus_28095.0|BlastHit|gi|20139178|sp|Q9HBI1.1|PARVB_HUMAN
10416	876	A	G	Locus_28095.0|BlastHit|gi|20139178|sp|Q9HBI1.1|PARVB_HUMAN
10417	1009	A	G	Locus_28097.0|BlastHit|gi|108935870|sp|P54319.3|PLAP_RAT
10417	1066	T	C	Locus_28097.0|BlastHit|gi|108935870|sp|P54319.3|PLAP_RAT
10417	1660	A	C	Locus_28097.0|BlastHit|gi|108935870|sp|P54319.3|PLAP_RAT
10417	2194	A	T	Locus_28097.0|BlastHit|gi|108935870|sp|P54319.3|PLAP_RAT
10417	2347	A	G	Locus_28097.0|BlastHit|gi|108935870|sp|P54319.3|PLAP_RAT
10431	101	A	T	Locus_28112.0|BlastHit|gi|41016924|sp|Q9DC53.2|CPNE8_MOUSE
10431	1421	T	C	Locus_28112.0|BlastHit|gi|41016924|sp|Q9DC53.2|CPNE8_MOUSE
10431	1451	T	C	Locus_28112.0|BlastHit|gi|41016924|sp|Q9DC53.2|CPNE8_MOUSE
10431	1505	C	T	Locus_28112.0|BlastHit|gi|41016924|sp|Q9DC53.2|CPNE8_MOUSE
10432	1048	A	G	Locus_28113.0|BlastHit|gi|123906249|sp|Q0VFE3.1|PGAP3_XENTR
10432	1729	G	A	Locus_28113.0|BlastHit|gi|123906249|sp|Q0VFE3.1|PGAP3_XENTR
10444	1012	C	T	Locus_28123.0|BlastHit|gi|300681185|sp|B0WC46.1|TRET1_CULQU
10444	679	C	T	Locus_28123.0|BlastHit|gi|300681185|sp|B0WC46.1|TRET1_CULQU
10444	709	C	T,A	Locus_28123.0|BlastHit|gi|300681185|sp|B0WC46.1|TRET1_CULQU
10445	1514	G	A	Locus_28124.0|BlastHit|gi|125951933|sp|Q6ZQ89.2|MARH6_MOUSE
10445	839	G	A	Locus_28124.0|BlastHit|gi|125951933|sp|Q6ZQ89.2|MARH6_MOUSE
10445	935	G	A	Locus_28124.0|BlastHit|gi|125951933|sp|Q6ZQ89.2|MARH6_MOUSE
10446	1807	C	T	Locus_28125.0|BlastHit|gi|121328|sp|P13255.2|GNMT_RAT
10446	1867	T	C	Locus_28125.0|BlastHit|gi|121328|sp|P13255.2|GNMT_RAT
10446	544	C	G	Locus_28125.0|BlastHit|gi|121328|sp|P13255.2|GNMT_RAT
10446	566	G	A	Locus_28125.0|BlastHit|gi|121328|sp|P13255.2|GNMT_RAT
10447	1292	T	G	Locus_28126.0|BlastHit|gi|2493535|sp|P89116.1|CASP1_SPOFR
10447	1989	C	G	Locus_28126.0|BlastHit|gi|2493535|sp|P89116.1|CASP1_SPOFR
10447	2037	C	T	Locus_28126.0|BlastHit|gi|2493535|sp|P89116.1|CASP1_SPOFR
10447	932	A	G	Locus_28126.0|BlastHit|gi|2493535|sp|P89116.1|CASP1_SPOFR
10447	956	A	T	Locus_28126.0|BlastHit|gi|2493535|sp|P89116.1|CASP1_SPOFR
10454	1761	A	G	Locus_28133.0|BlastHit|gi|119359|sp|P08110.1|ENPL_CHICK
10455	640	C	T	Locus_28133.1|BlastHit|gi|190359360|sp|Q4AEH7.2|GPX2_CEBAP
10457	676	G	T	Locus_28135.0|BlastHit|gi|82115038|sp|Q9I923.1|RGN_CHICK
10457	769	T	C	Locus_28135.0|BlastHit|gi|82115038|sp|Q9I923.1|RGN_CHICK
10458	617	T	G	Locus_28136.0|BlastHit|gi|68052427|sp|Q5DUB2.1|NK2R_CANFA
10463	1201	C	T	Locus_28142.0|BlastHit|gi|81906588|sp|Q9JHG1.1|PIGP_MOUSE
10463	580	A	T	Locus_28142.0|BlastHit|gi|81906588|sp|Q9JHG1.1|PIGP_MOUSE
10463	758	T	C	Locus_28142.0|BlastHit|gi|81906588|sp|Q9JHG1.1|PIGP_MOUSE
1046	584	C	A	Locus_7745.0|BlastHit|gi|417719|sp|P23396.2|RS3_HUMAN
10484	276	T	C	Locus_28153.0|BlastHit|gi|172045934|sp|Q9I7U4.3|TITIN_DROME
10484	766	C	T	Locus_28153.0|BlastHit|gi|172045934|sp|Q9I7U4.3|TITIN_DROME
10488	1074	A	G	Locus_28154.0|BlastHit|gi|20139238|sp|Q9NY93.1|DDX56_HUMAN
10488	1097	G	A	Locus_28154.0|BlastHit|gi|20139238|sp|Q9NY93.1|DDX56_HUMAN
10488	1437	G	A	Locus_28154.0|BlastHit|gi|20139238|sp|Q9NY93.1|DDX56_HUMAN
10488	1441	T	G	Locus_28154.0|BlastHit|gi|20139238|sp|Q9NY93.1|DDX56_HUMAN
10488	921	T	G	Locus_28154.0|BlastHit|gi|20139238|sp|Q9NY93.1|DDX56_HUMAN
10489	1150	G	A	Locus_28155.0|BlastHit|gi|134034993|sp|Q14997.2|PSME4_HUMAN
10489	2454	G	A	Locus_28155.0|BlastHit|gi|134034993|sp|Q14997.2|PSME4_HUMAN
10489	3652	C	T	Locus_28155.0|BlastHit|gi|134034993|sp|Q14997.2|PSME4_HUMAN
10489	3961	C	T	Locus_28155.0|BlastHit|gi|134034993|sp|Q14997.2|PSME4_HUMAN
10489	5083	A	T	Locus_28155.0|BlastHit|gi|134034993|sp|Q14997.2|PSME4_HUMAN
10490	1466	C	T,G	Locus_28156.0|BlastHit|gi|123884466|sp|Q08CX5.1|TBC24_XENTR
10490	2261	A	G	Locus_28156.0|BlastHit|gi|123884466|sp|Q08CX5.1|TBC24_XENTR
10491	1080	C	A	Locus_28159.0|BlastHit|gi|166219770|sp|P0C606.1|SGF29_RAT
10491	1345	G	T	Locus_28159.0|BlastHit|gi|166219770|sp|P0C606.1|SGF29_RAT
10491	419	G	A	Locus_28159.0|BlastHit|gi|166219770|sp|P0C606.1|SGF29_RAT
10495	1067	C	T	Locus_28164.0|BlastHit|gi|33302633|sp|Q9VLS1.2|KPBB_DROME
10495	1175	C	T	Locus_28164.0|BlastHit|gi|33302633|sp|Q9VLS1.2|KPBB_DROME
10495	1406	C	T	Locus_28164.0|BlastHit|gi|33302633|sp|Q9VLS1.2|KPBB_DROME
10495	1454	C	A	Locus_28164.0|BlastHit|gi|33302633|sp|Q9VLS1.2|KPBB_DROME
10495	173	C	T	Locus_28164.0|BlastHit|gi|33302633|sp|Q9VLS1.2|KPBB_DROME
10495	185	C	T	Locus_28164.0|BlastHit|gi|33302633|sp|Q9VLS1.2|KPBB_DROME
10495	2048	T	C	Locus_28164.0|BlastHit|gi|33302633|sp|Q9VLS1.2|KPBB_DROME
10495	404	T	C	Locus_28164.0|BlastHit|gi|33302633|sp|Q9VLS1.2|KPBB_DROME
10495	416	T	C	Locus_28164.0|BlastHit|gi|33302633|sp|Q9VLS1.2|KPBB_DROME
10495	524	A	T	Locus_28164.0|BlastHit|gi|33302633|sp|Q9VLS1.2|KPBB_DROME
10495	582	C	T	Locus_28164.0|BlastHit|gi|33302633|sp|Q9VLS1.2|KPBB_DROME
10496	1688	T	A	Locus_28165.0|BlastHit|gi|82178902|sp|Q5EAU9.1|RMD3_XENLA
10500	2586	T	C	Locus_28168.0|BlastHit|gi|108860896|sp|Q3T0W4.1|PP1R7_BOVIN
10500	2599	T	C	Locus_28168.0|BlastHit|gi|108860896|sp|Q3T0W4.1|PP1R7_BOVIN
10500	2645	A	G	Locus_28168.0|BlastHit|gi|108860896|sp|Q3T0W4.1|PP1R7_BOVIN
10500	75	G	A	Locus_28168.0|BlastHit|gi|108860896|sp|Q3T0W4.1|PP1R7_BOVIN
10500	754	T	C	Locus_28168.0|BlastHit|gi|108860896|sp|Q3T0W4.1|PP1R7_BOVIN
10500	897	A	G	Locus_28168.0|BlastHit|gi|108860896|sp|Q3T0W4.1|PP1R7_BOVIN
10501	1126	C	T	Locus_28169.0|BlastHit|gi|34921813|sp|Q8IZR5.1|CKLF4_HUMAN
10501	2008	C	T	Locus_28169.0|BlastHit|gi|34921813|sp|Q8IZR5.1|CKLF4_HUMAN
10504	912	G	A	Locus_28171.0|BlastHit|gi|81590232|sp|Q8FIT1.1|GHRA_ECOL6
10504	917	C	G	Locus_28171.0|BlastHit|gi|81590232|sp|Q8FIT1.1|GHRA_ECOL6
10509	2635	G	A	Locus_28175.0|BlastHit|gi|81875546|sp|Q8BWQ4.1|FTSJ1_MOUSE
10509	3014	C	T	Locus_28175.0|BlastHit|gi|81875546|sp|Q8BWQ4.1|FTSJ1_MOUSE
10509	3186	T	C	Locus_28175.0|BlastHit|gi|81875546|sp|Q8BWQ4.1|FTSJ1_MOUSE
10509	3218	T	C	Locus_28175.0|BlastHit|gi|81875546|sp|Q8BWQ4.1|FTSJ1_MOUSE
10509	3402	G	A	Locus_28175.0|BlastHit|gi|81875546|sp|Q8BWQ4.1|FTSJ1_MOUSE
10509	551	T	C	Locus_28175.0|BlastHit|gi|81875546|sp|Q8BWQ4.1|FTSJ1_MOUSE
10510	1187	C	T	Locus_28176.1|BlastHit|gi|311033473|sp|P30838.3|AL3A1_HUMAN
10510	1238	C	T	Locus_28176.1|BlastHit|gi|311033473|sp|P30838.3|AL3A1_HUMAN
10513	1908	T	C	Locus_28182.0|BlastHit|gi|226709091|sp|P10586.2|PTPRF_HUMAN
10514	295	C	A	Locus_28183.0|BlastHit|gi|75042696|sp|Q5RFT1.1|CB018_PONAB
10517	189	C	T	Locus_28185.0|BlastHit|gi|121949074|sp|Q496Y0.1|LONF3_HUMAN
10517	2254	T	C	Locus_28185.0|BlastHit|gi|121949074|sp|Q496Y0.1|LONF3_HUMAN
10517	2280	T	A	Locus_28185.0|BlastHit|gi|121949074|sp|Q496Y0.1|LONF3_HUMAN
10517	2734	C	T	Locus_28185.0|BlastHit|gi|121949074|sp|Q496Y0.1|LONF3_HUMAN
10517	499	A	G	Locus_28185.0|BlastHit|gi|121949074|sp|Q496Y0.1|LONF3_HUMAN
10517	537	T	C	Locus_28185.0|BlastHit|gi|121949074|sp|Q496Y0.1|LONF3_HUMAN
10522	599	C	A	Locus_28191.0|BlastHit|gi|119367813|sp|Q1LZ96.1|ATPF2_BOVIN
1052	238	T	A	Locus_7768.0|BlastHit|gi|14286156|sp|P50882.2|RL9_DROME
10532	123	C	A	Locus_28199.0|BlastHit|gi|134053|sp|P10735.1|RT12_DROME
10532	144	T	C	Locus_28199.0|BlastHit|gi|134053|sp|P10735.1|RT12_DROME
10537	257	G	A	Locus_28202.0|BlastHit|gi|56748615|sp|Q9NVV5.2|AIG1_HUMAN
10537	261	C	T	Locus_28202.0|BlastHit|gi|56748615|sp|Q9NVV5.2|AIG1_HUMAN
10537	811	A	G	Locus_28202.0|BlastHit|gi|56748615|sp|Q9NVV5.2|AIG1_HUMAN
10537	814	A	G	Locus_28202.0|BlastHit|gi|56748615|sp|Q9NVV5.2|AIG1_HUMAN
10548	570	G	A	Locus_28211.1|BlastHit|gi|20141580|sp|Q02978.3|M2OM_HUMAN
10548	582	G	A	Locus_28211.1|BlastHit|gi|20141580|sp|Q02978.3|M2OM_HUMAN
10548	585	T	C	Locus_28211.1|BlastHit|gi|20141580|sp|Q02978.3|M2OM_HUMAN
10549	1186	A	T	Locus_28212.0|BlastHit|gi|78103330|sp|Q5I043.1|UBP28_MOUSE
10549	1825	G	A	Locus_28212.0|BlastHit|gi|78103330|sp|Q5I043.1|UBP28_MOUSE
10549	2059	T	A	Locus_28212.0|BlastHit|gi|78103330|sp|Q5I043.1|UBP28_MOUSE
10549	2656	A	G	Locus_28212.0|BlastHit|gi|78103330|sp|Q5I043.1|UBP28_MOUSE
10549	2923	T	C	Locus_28212.0|BlastHit|gi|78103330|sp|Q5I043.1|UBP28_MOUSE
10549	3085	C	T	Locus_28212.0|BlastHit|gi|78103330|sp|Q5I043.1|UBP28_MOUSE
10549	4086	A	G	Locus_28212.0|BlastHit|gi|78103330|sp|Q5I043.1|UBP28_MOUSE
10550	259	G	A	Locus_28214.0|BlastHit|gi|62298570|sp|Q8NBN7.2|RDH13_HUMAN
10550	439	G	A	Locus_28214.0|BlastHit|gi|62298570|sp|Q8NBN7.2|RDH13_HUMAN
10550	814	C	T	Locus_28214.0|BlastHit|gi|62298570|sp|Q8NBN7.2|RDH13_HUMAN
10550	97	A	G	Locus_28214.0|BlastHit|gi|62298570|sp|Q8NBN7.2|RDH13_HUMAN
10551	798	C	A	Locus_28215.0|BlastHit|gi|2498124|sp|P70389.1|ALS_MOUSE
10552	584	C	T	Locus_28216.0|BlastHit|gi|145559525|sp|P82925.3|RT31_BOVIN
10552	593	C	T	Locus_28216.0|BlastHit|gi|145559525|sp|P82925.3|RT31_BOVIN
10554	1226	C	A,T	Locus_28221.0|BlastHit|gi|118572819|sp|Q2KJI7.1|AFG32_BOVIN
10554	127	T	C,G	Locus_28221.0|BlastHit|gi|118572819|sp|Q2KJI7.1|AFG32_BOVIN
10554	2349	G	C	Locus_28221.0|BlastHit|gi|118572819|sp|Q2KJI7.1|AFG32_BOVIN
10554	2378	C	T	Locus_28221.0|BlastHit|gi|118572819|sp|Q2KJI7.1|AFG32_BOVIN
10557	321	G	C	Locus_28224.0|BlastHit|gi|281312154|sp|P0CC10.1|LRC4B_RAT
10557	337	A	G	Locus_28224.0|BlastHit|gi|281312154|sp|P0CC10.1|LRC4B_RAT
10564	1027	G	A	Locus_28231.0|BlastHit|gi|108860959|sp|Q2KID9.1|RT05_BOVIN
10564	218	C	T	Locus_28231.0|BlastHit|gi|108860959|sp|Q2KID9.1|RT05_BOVIN
10564	232	T	A	Locus_28231.0|BlastHit|gi|108860959|sp|Q2KID9.1|RT05_BOVIN
10564	631	T	A	Locus_28231.0|BlastHit|gi|108860959|sp|Q2KID9.1|RT05_BOVIN
10566	3206	G	A	Locus_28236.0|BlastHit|gi|166225158|sp|A2BGA0.1|RFX4_DANRE
10567	242	G	A	Locus_28237.0|BlastHit|gi|122140255|sp|Q3SZM3.1|CQ062_BOVIN
10567	276	G	A	Locus_28237.0|BlastHit|gi|122140255|sp|Q3SZM3.1|CQ062_BOVIN
10567	2981	C	A	Locus_28237.0|BlastHit|gi|122140255|sp|Q3SZM3.1|CQ062_BOVIN
10580	2012	G	A	Locus_28246.0|BlastHit|gi|122145942|sp|Q2F7Z7.1|TMM59_PIG
10580	2092	G	A	Locus_28246.0|BlastHit|gi|122145942|sp|Q2F7Z7.1|TMM59_PIG
10580	2229	G	T	Locus_28246.0|BlastHit|gi|122145942|sp|Q2F7Z7.1|TMM59_PIG
10580	2257	G	A	Locus_28246.0|BlastHit|gi|122145942|sp|Q2F7Z7.1|TMM59_PIG
10580	448	A	G	Locus_28246.0|BlastHit|gi|122145942|sp|Q2F7Z7.1|TMM59_PIG
10580	449	A	C	Locus_28246.0|BlastHit|gi|122145942|sp|Q2F7Z7.1|TMM59_PIG
10582	234	G	C	Locus_28248.0|BlastHit|gi|115502344|sp|Q0MQG7.1|NDUS3_GORGO
10582	357	G	A	Locus_28248.0|BlastHit|gi|115502344|sp|Q0MQG7.1|NDUS3_GORGO
10582	615	A	G	Locus_28248.0|BlastHit|gi|115502344|sp|Q0MQG7.1|NDUS3_GORGO
10582	894	C	T	Locus_28248.0|BlastHit|gi|115502344|sp|Q0MQG7.1|NDUS3_GORGO
10582	900	A	C	Locus_28248.0|BlastHit|gi|115502344|sp|Q0MQG7.1|NDUS3_GORGO
10582	906	C	G	Locus_28248.0|BlastHit|gi|115502344|sp|Q0MQG7.1|NDUS3_GORGO
10582	951	G	A	Locus_28248.0|BlastHit|gi|115502344|sp|Q0MQG7.1|NDUS3_GORGO
1058	236	A	G	Locus_7789.0|BlastHit|gi|14286121|sp|O18640.2|GBLP_DROME
10591	389	T	A,C	Locus_28259.0|BlastHit|gi|74758577|sp|Q6UXK2.1|ISLR2_HUMAN
10595	210	C	G	Locus_28265.0|BlastHit|gi|1172740|sp|P42556.1|PTR1_LEITA
10595	262	A	G	Locus_28265.0|BlastHit|gi|1172740|sp|P42556.1|PTR1_LEITA
10595	382	G	A	Locus_28265.0|BlastHit|gi|1172740|sp|P42556.1|PTR1_LEITA
10595	490	A	G	Locus_28265.0|BlastHit|gi|1172740|sp|P42556.1|PTR1_LEITA
10595	57	C	T	Locus_28265.0|BlastHit|gi|1172740|sp|P42556.1|PTR1_LEITA
10595	658	G	A	Locus_28265.0|BlastHit|gi|1172740|sp|P42556.1|PTR1_LEITA
10595	67	A	C	Locus_28265.0|BlastHit|gi|1172740|sp|P42556.1|PTR1_LEITA
10601	1001	G	T	Locus_28268.0|BlastHit|gi|115311862|sp|Q1XHY1.1|RT18B_PANTR
10601	1002	C	A	Locus_28268.0|BlastHit|gi|115311862|sp|Q1XHY1.1|RT18B_PANTR
10601	1060	C	T	Locus_28268.0|BlastHit|gi|115311862|sp|Q1XHY1.1|RT18B_PANTR
10601	701	G	A	Locus_28268.0|BlastHit|gi|115311862|sp|Q1XHY1.1|RT18B_PANTR
10601	728	T	C	Locus_28268.0|BlastHit|gi|115311862|sp|Q1XHY1.1|RT18B_PANTR
10602	1775	A	G	Locus_28269.0|BlastHit|gi|110825795|sp|P07031.2|ACYP2_CHICK
10602	308	C	T	Locus_28269.0|BlastHit|gi|110825795|sp|P07031.2|ACYP2_CHICK
10602	587	C	A	Locus_28269.0|BlastHit|gi|110825795|sp|P07031.2|ACYP2_CHICK
10602	588	T	C	Locus_28269.0|BlastHit|gi|110825795|sp|P07031.2|ACYP2_CHICK
10602	677	A	G	Locus_28269.0|BlastHit|gi|110825795|sp|P07031.2|ACYP2_CHICK
10602	900	G	A	Locus_28269.0|BlastHit|gi|110825795|sp|P07031.2|ACYP2_CHICK
10609	1379	G	C	Locus_28284.0|BlastHit|gi|67461040|sp|Q7T2H2.1|FGRL1_CHICK
10613	4574	T	G	Locus_28288.0|BlastHit|gi|76803554|sp|Q13206.2|DDX10_HUMAN
10613	4722	C	T	Locus_28288.0|BlastHit|gi|76803554|sp|Q13206.2|DDX10_HUMAN
10627	2106	A	G	Locus_28300.0|BlastHit|gi|115502368|sp|O75976.2|CBPD_HUMAN
10631	123	A	G	Locus_28305.0|BlastHit|gi|190358720|sp|A7RNG8.1|CCD22_NEMVE
10634	1443	C	T	Locus_28306.0|BlastHit|gi|127717|sp|P29218.1|IMPA1_HUMAN
10635	1050	A	G	Locus_28307.0|BlastHit|gi|47116230|sp|Q91Z53.1|GRHPR_MOUSE
10635	1059	A	T	Locus_28307.0|BlastHit|gi|47116230|sp|Q91Z53.1|GRHPR_MOUSE
10635	1104	G	A	Locus_28307.0|BlastHit|gi|47116230|sp|Q91Z53.1|GRHPR_MOUSE
10635	1114	T	C	Locus_28307.0|BlastHit|gi|47116230|sp|Q91Z53.1|GRHPR_MOUSE
10635	114	A	T	Locus_28307.0|BlastHit|gi|47116230|sp|Q91Z53.1|GRHPR_MOUSE
10635	342	C	T	Locus_28307.0|BlastHit|gi|47116230|sp|Q91Z53.1|GRHPR_MOUSE
10635	411	G	A	Locus_28307.0|BlastHit|gi|47116230|sp|Q91Z53.1|GRHPR_MOUSE
10635	549	A	G	Locus_28307.0|BlastHit|gi|47116230|sp|Q91Z53.1|GRHPR_MOUSE
10635	714	A	G	Locus_28307.0|BlastHit|gi|47116230|sp|Q91Z53.1|GRHPR_MOUSE
10635	771	T	A	Locus_28307.0|BlastHit|gi|47116230|sp|Q91Z53.1|GRHPR_MOUSE
10635	840	A	G	Locus_28307.0|BlastHit|gi|47116230|sp|Q91Z53.1|GRHPR_MOUSE
10635	933	C	A,T	Locus_28307.0|BlastHit|gi|47116230|sp|Q91Z53.1|GRHPR_MOUSE
10636	1001	A	G	Locus_28308.0|BlastHit|gi|6685712|sp|O60733.2|PA2G6_HUMAN
10636	1131	T	A	Locus_28308.0|BlastHit|gi|6685712|sp|O60733.2|PA2G6_HUMAN
10636	2505	T	G	Locus_28308.0|BlastHit|gi|6685712|sp|O60733.2|PA2G6_HUMAN
10642	104	G	T	Locus_28314.0|BlastHit|gi|81911277|sp|Q6P5P3.1|TTC9C_RAT
10642	409	T	C	Locus_28314.0|BlastHit|gi|81911277|sp|Q6P5P3.1|TTC9C_RAT
10642	424	G	A	Locus_28314.0|BlastHit|gi|81911277|sp|Q6P5P3.1|TTC9C_RAT
10642	673	A	G	Locus_28314.0|BlastHit|gi|81911277|sp|Q6P5P3.1|TTC9C_RAT
10643	746	C	T	Locus_28315.0|BlastHit|gi|62286592|sp|O95352.1|ATG7_HUMAN
10643	778	C	A	Locus_28315.0|BlastHit|gi|62286592|sp|O95352.1|ATG7_HUMAN
10644	1587	G	A	Locus_28318.0|BlastHit|gi|82249463|sp|Q4QRJ7.1|EIF2A_DANRE
10644	1803	T	G	Locus_28318.0|BlastHit|gi|82249463|sp|Q4QRJ7.1|EIF2A_DANRE
10644	2235	C	T	Locus_28318.0|BlastHit|gi|82249463|sp|Q4QRJ7.1|EIF2A_DANRE
10644	2478	C	T	Locus_28318.0|BlastHit|gi|82249463|sp|Q4QRJ7.1|EIF2A_DANRE
10644	2640	T	C,A	Locus_28318.0|BlastHit|gi|82249463|sp|Q4QRJ7.1|EIF2A_DANRE
10644	2763	T	C	Locus_28318.0|BlastHit|gi|82249463|sp|Q4QRJ7.1|EIF2A_DANRE
10644	2787	G	A	Locus_28318.0|BlastHit|gi|82249463|sp|Q4QRJ7.1|EIF2A_DANRE
10644	2973	C	T	Locus_28318.0|BlastHit|gi|82249463|sp|Q4QRJ7.1|EIF2A_DANRE
10644	851	A	G	Locus_28318.0|BlastHit|gi|82249463|sp|Q4QRJ7.1|EIF2A_DANRE
10647	173	G	T	Locus_28323.0|BlastHit|gi|75041803|sp|Q5R9Y3.1|ABT1_PONAB
10647	275	G	A	Locus_28323.0|BlastHit|gi|75041803|sp|Q5R9Y3.1|ABT1_PONAB
10649	490	T	A	Locus_28326.0|BlastHit|gi|134035378|sp|Q8IUS5.2|EPHX4_HUMAN
10649	593	A	T	Locus_28326.0|BlastHit|gi|134035378|sp|Q8IUS5.2|EPHX4_HUMAN
10649	658	T	C	Locus_28326.0|BlastHit|gi|134035378|sp|Q8IUS5.2|EPHX4_HUMAN
10650	833	T	C	Locus_28328.0|BlastHit|gi|122140310|sp|Q3T001.1|H17B6_BOVIN
10653	331	A	T	Locus_28331.0|BlastHit|gi|48474224|sp|Q8SQC1.1|SCRB1_PIG
10654	3555	C	A	Locus_28333.0|BlastHit|gi|59797970|sp|Q9NVF7.1|FBX28_HUMAN
10654	3730	T	C	Locus_28333.0|BlastHit|gi|59797970|sp|Q9NVF7.1|FBX28_HUMAN
10654	5332	G	A	Locus_28333.0|BlastHit|gi|59797970|sp|Q9NVF7.1|FBX28_HUMAN
10657	374	A	T	Locus_28338.0|BlastHit|gi|75024694|sp|Q9TXJ0.1|CMK1_CAEEL
10657	382	C	T	Locus_28338.0|BlastHit|gi|75024694|sp|Q9TXJ0.1|CMK1_CAEEL
10657	3837	C	T	Locus_28338.0|BlastHit|gi|75024694|sp|Q9TXJ0.1|CMK1_CAEEL
10665	1030	T	A	Locus_28349.0|BlastHit|gi|81914299|sp|Q8CDF7.1|EXD1_MOUSE
10665	1228	A	G	Locus_28349.0|BlastHit|gi|81914299|sp|Q8CDF7.1|EXD1_MOUSE
10665	1258	C	T	Locus_28349.0|BlastHit|gi|81914299|sp|Q8CDF7.1|EXD1_MOUSE
10666	1014	T	A	Locus_28353.0|BlastHit|gi|13124123|sp|Q13630.1|FCL_HUMAN
10668	1468	C	T	Locus_28353.1|BlastHit|gi|166215069|sp|Q9V6L0.3|KDM4B_DROME
10668	1819	C	G	Locus_28353.1|BlastHit|gi|166215069|sp|Q9V6L0.3|KDM4B_DROME
1066	226	G	C	Locus_7812.0|BlastHit|gi|400515|sp|Q02370.2|NDUA2_BOVIN
10670	1360	C	T	Locus_28357.0|BlastHit|gi|341940214|sp|P00687.2|AMY1_MOUSE
10670	1657	T	C	Locus_28357.0|BlastHit|gi|341940214|sp|P00687.2|AMY1_MOUSE
10670	1766	A	T	Locus_28357.0|BlastHit|gi|341940214|sp|P00687.2|AMY1_MOUSE
10670	649	G	A	Locus_28357.0|BlastHit|gi|341940214|sp|P00687.2|AMY1_MOUSE
10671	70	A	C	Locus_28357.0|BlastHit|gi|33860120|sp|P00690.3|AMYP_PIG
10672	1319	A	T	Locus_28358.0|BlastHit|gi|82237116|sp|Q6NRH1.1|DCAF8_XENLA
10672	2816	A	G	Locus_28358.0|BlastHit|gi|82237116|sp|Q6NRH1.1|DCAF8_XENLA
10672	548	T	G	Locus_28358.0|BlastHit|gi|82237116|sp|Q6NRH1.1|DCAF8_XENLA
10672	573	A	T	Locus_28358.0|BlastHit|gi|82237116|sp|Q6NRH1.1|DCAF8_XENLA
10672	997	C	T	Locus_28358.0|BlastHit|gi|82237116|sp|Q6NRH1.1|DCAF8_XENLA
10674	148	A	T,C	Locus_28361.0|BlastHit|gi|74753513|sp|Q9Y5Z4.1|HEBP2_HUMAN
10674	1514	C	A	Locus_28361.0|BlastHit|gi|74753513|sp|Q9Y5Z4.1|HEBP2_HUMAN
10674	518	C	A,T	Locus_28361.0|BlastHit|gi|74753513|sp|Q9Y5Z4.1|HEBP2_HUMAN
10674	653	A	G	Locus_28361.0|BlastHit|gi|74753513|sp|Q9Y5Z4.1|HEBP2_HUMAN
10680	1051	G	A	Locus_28371.0|BlastHit|gi|122140334|sp|Q3T062.1|RRP15_BOVIN
10680	1168	A	C	Locus_28371.0|BlastHit|gi|122140334|sp|Q3T062.1|RRP15_BOVIN
10680	604	C	T	Locus_28371.0|BlastHit|gi|122140334|sp|Q3T062.1|RRP15_BOVIN
10680	670	C	T	Locus_28371.0|BlastHit|gi|122140334|sp|Q3T062.1|RRP15_BOVIN
10680	844	A	G	Locus_28371.0|BlastHit|gi|122140334|sp|Q3T062.1|RRP15_BOVIN
10683	1154	A	G	Locus_28374.0|BlastHit|gi|74948615|sp|Q9VVI9.2|CHMP5_DROME
10686	3547	T	C	Locus_28377.0|BlastHit|gi|59802978|sp|O14841.3|OPLA_HUMAN
10686	3586	G	C	Locus_28377.0|BlastHit|gi|59802978|sp|O14841.3|OPLA_HUMAN
10686	3640	C	T	Locus_28377.0|BlastHit|gi|59802978|sp|O14841.3|OPLA_HUMAN
10686	4316	T	C	Locus_28377.0|BlastHit|gi|59802978|sp|O14841.3|OPLA_HUMAN
10687	1008	G	A	Locus_28378.0|BlastHit|gi|82241376|sp|Q7ZV22.2|MTAP_DANRE
10687	1278	T	A	Locus_28378.0|BlastHit|gi|82241376|sp|Q7ZV22.2|MTAP_DANRE
10687	218	C	G	Locus_28378.0|BlastHit|gi|82241376|sp|Q7ZV22.2|MTAP_DANRE
10687	402	T	C	Locus_28378.0|BlastHit|gi|82241376|sp|Q7ZV22.2|MTAP_DANRE
10687	459	C	T	Locus_28378.0|BlastHit|gi|82241376|sp|Q7ZV22.2|MTAP_DANRE
10687	590	T	C	Locus_28378.0|BlastHit|gi|82241376|sp|Q7ZV22.2|MTAP_DANRE
10687	591	G	A	Locus_28378.0|BlastHit|gi|82241376|sp|Q7ZV22.2|MTAP_DANRE
10687	679	T	C	Locus_28378.0|BlastHit|gi|82241376|sp|Q7ZV22.2|MTAP_DANRE
10687	960	A	G	Locus_28378.0|BlastHit|gi|82241376|sp|Q7ZV22.2|MTAP_DANRE
10694	1360	G	A	Locus_28386.0|BlastHit|gi|55584180|sp|Q61753.3|SERA_MOUSE
10694	1643	A	G	Locus_28386.0|BlastHit|gi|55584180|sp|Q61753.3|SERA_MOUSE
10694	1825	C	G	Locus_28386.0|BlastHit|gi|55584180|sp|Q61753.3|SERA_MOUSE
10695	1538	G	A	Locus_28387.0|BlastHit|gi|229463041|sp|O14681.4|EI24_HUMAN
10695	1786	C	T	Locus_28387.0|BlastHit|gi|229463041|sp|O14681.4|EI24_HUMAN
10695	244	T	A	Locus_28387.0|BlastHit|gi|229463041|sp|O14681.4|EI24_HUMAN
10695	338	C	T	Locus_28387.0|BlastHit|gi|229463041|sp|O14681.4|EI24_HUMAN
10695	787	G	A	Locus_28387.0|BlastHit|gi|229463041|sp|O14681.4|EI24_HUMAN
10696	648	A	G	Locus_28388.0|BlastHit|gi|82181143|sp|Q66IB8.1|CB076_DANRE
10699	1458	G	A	Locus_28391.0|BlastHit|gi|81906595|sp|Q9JHS9.1|CWC15_MOUSE
10699	1546	A	C,G	Locus_28391.0|BlastHit|gi|81906595|sp|Q9JHS9.1|CWC15_MOUSE
10699	766	G	A	Locus_28391.0|BlastHit|gi|81906595|sp|Q9JHS9.1|CWC15_MOUSE
10699	961	C	T	Locus_28391.0|BlastHit|gi|81906595|sp|Q9JHS9.1|CWC15_MOUSE
10705	1161	C	T	Locus_28399.0|BlastHit|gi|110816407|sp|Q1RMT7.1|RIOK3_BOVIN
10705	1256	A	G	Locus_28399.0|BlastHit|gi|110816407|sp|Q1RMT7.1|RIOK3_BOVIN
10705	145	G	A	Locus_28399.0|BlastHit|gi|110816407|sp|Q1RMT7.1|RIOK3_BOVIN
10705	479	C	T	Locus_28399.0|BlastHit|gi|110816407|sp|Q1RMT7.1|RIOK3_BOVIN
10706	1501	T	C	Locus_28400.0|BlastHit|gi|74718904|sp|Q9HD15.1|SRA1_HUMAN
1070	326	C	T	Locus_7823.0|BlastHit|gi|122049032|sp|Q4GXG7.1|RL18_TIMBA
10711	1391	G	A	Locus_28408.0|BlastHit|gi|298351695|sp|B5X1G3.1|GPHR_SALSA
10713	1151	G	A	Locus_28411.0|BlastHit|gi|59803098|sp|Q16851.5|UGPA_HUMAN
10713	1302	T	G	Locus_28411.0|BlastHit|gi|59803098|sp|Q16851.5|UGPA_HUMAN
10716	2469	C	T	Locus_28414.0|BlastHit|gi|81914354|sp|Q8CFE4.1|SCYL2_MOUSE
10716	623	C	T	Locus_28414.0|BlastHit|gi|81914354|sp|Q8CFE4.1|SCYL2_MOUSE
10717	1463	G	C	Locus_28415.0|BlastHit|gi|122129633|sp|Q7K237.1|C1GLT_DROME
10720	2181	T	G,A	Locus_28419.0|BlastHit|gi|147742924|sp|A0JNH9.1|APLF_BOVIN
10720	887	T	C	Locus_28419.0|BlastHit|gi|147742924|sp|A0JNH9.1|APLF_BOVIN
10720	967	T	C	Locus_28419.0|BlastHit|gi|147742924|sp|A0JNH9.1|APLF_BOVIN
10720	993	A	G	Locus_28419.0|BlastHit|gi|147742924|sp|A0JNH9.1|APLF_BOVIN
10721	1956	T	C	Locus_28420.0|BlastHit|gi|209572761|sp|Q8TF62.3|AT8B4_HUMAN
10721	2058	G	A	Locus_28420.0|BlastHit|gi|209572761|sp|Q8TF62.3|AT8B4_HUMAN
10722	1156	A	G	Locus_28421.0|BlastHit|gi|81907944|sp|Q4V8J4.1|GPAT3_RAT
10722	802	C	G,A	Locus_28421.0|BlastHit|gi|81907944|sp|Q4V8J4.1|GPAT3_RAT
10728	331	C	T	Locus_28428.1|BlastHit|gi|317373385|sp|O75581.2|LRP6_HUMAN
10728	334	C	G	Locus_28428.1|BlastHit|gi|317373385|sp|O75581.2|LRP6_HUMAN
10728	574	G	A	Locus_28428.1|BlastHit|gi|317373385|sp|O75581.2|LRP6_HUMAN
10728	646	G	A	Locus_28428.1|BlastHit|gi|317373385|sp|O75581.2|LRP6_HUMAN
1072	619	T	A	Locus_7828.0|BlastHit|gi|85701142|sp|Q3SZ71.1|MPPB_BOVIN
10731	1069	T	C	Locus_28431.0|BlastHit|gi|121956694|sp|Q3T0R7.1|THIM_BOVIN
10731	39	A	G	Locus_28431.0|BlastHit|gi|121956694|sp|Q3T0R7.1|THIM_BOVIN
10731	664	T	A	Locus_28431.0|BlastHit|gi|121956694|sp|Q3T0R7.1|THIM_BOVIN
10731	754	A	G	Locus_28431.0|BlastHit|gi|121956694|sp|Q3T0R7.1|THIM_BOVIN
10731	841	T	G	Locus_28431.0|BlastHit|gi|121956694|sp|Q3T0R7.1|THIM_BOVIN
10731	892	C	T	Locus_28431.0|BlastHit|gi|121956694|sp|Q3T0R7.1|THIM_BOVIN
10738	2525	A	C	Locus_28437.0|BlastHit|gi|73921665|sp|Q5R7A2.1|ALG1_PONAB
10739	10	T	G	Locus_28440.0|BlastHit|gi|18201959|sp|O13035.1|SAP_CHICK
10739	145	A	T	Locus_28440.0|BlastHit|gi|18201959|sp|O13035.1|SAP_CHICK
10739	1817	C	T	Locus_28440.0|BlastHit|gi|18201959|sp|O13035.1|SAP_CHICK
10739	1940	C	T	Locus_28440.0|BlastHit|gi|18201959|sp|O13035.1|SAP_CHICK
10739	2864	T	G	Locus_28440.0|BlastHit|gi|18201959|sp|O13035.1|SAP_CHICK
10739	3026	A	G	Locus_28440.0|BlastHit|gi|18201959|sp|O13035.1|SAP_CHICK
10739	3218	C	T	Locus_28440.0|BlastHit|gi|18201959|sp|O13035.1|SAP_CHICK
10739	3230	C	T	Locus_28440.0|BlastHit|gi|18201959|sp|O13035.1|SAP_CHICK
10739	3407	C	T	Locus_28440.0|BlastHit|gi|18201959|sp|O13035.1|SAP_CHICK
10739	3789	A	G	Locus_28440.0|BlastHit|gi|18201959|sp|O13035.1|SAP_CHICK
10739	383	G	A	Locus_28440.0|BlastHit|gi|18201959|sp|O13035.1|SAP_CHICK
10739	651	T	A	Locus_28440.0|BlastHit|gi|18201959|sp|O13035.1|SAP_CHICK
10739	992	C	T	Locus_28440.0|BlastHit|gi|18201959|sp|O13035.1|SAP_CHICK
10742	103	G	A	Locus_28449.0|BlastHit|gi|12644153|sp|P20007.2|PPCK_DROME
10742	310	G	A	Locus_28449.0|BlastHit|gi|12644153|sp|P20007.2|PPCK_DROME
10742	98	C	T	Locus_28449.0|BlastHit|gi|12644153|sp|P20007.2|PPCK_DROME
10743	1099	C	T	Locus_28449.0|BlastHit|gi|12644153|sp|P20007.2|PPCK_DROME
10750	1763	G	T	Locus_28461.0|BlastHit|gi|81889014|sp|Q5I0D7.1|PEPD_RAT
10755	2768	A	T	Locus_28469.0|BlastHit|gi|218526580|sp|A9C3P0.1|MLEC_DANRE
10755	2788	A	T	Locus_28469.0|BlastHit|gi|218526580|sp|A9C3P0.1|MLEC_DANRE
10758	93	T	A	Locus_28474.0|BlastHit|gi|81886959|sp|P70684.1|PGDH_CAVPO
10758	97	C	A	Locus_28474.0|BlastHit|gi|81886959|sp|P70684.1|PGDH_CAVPO
10759	550	C	T	Locus_28475.0|BlastHit|gi|62287016|sp|Q5ZIN1.1|NUDC_CHICK
10759	601	G	A	Locus_28475.0|BlastHit|gi|62287016|sp|Q5ZIN1.1|NUDC_CHICK
10759	799	C	A	Locus_28475.0|BlastHit|gi|62287016|sp|Q5ZIN1.1|NUDC_CHICK
10759	940	C	A	Locus_28475.0|BlastHit|gi|62287016|sp|Q5ZIN1.1|NUDC_CHICK
10760	1237	A	C	Locus_28480.0|BlastHit|gi|341940628|sp|O09174.4|AMACR_MOUSE
10760	132	C	T	Locus_28480.0|BlastHit|gi|341940628|sp|O09174.4|AMACR_MOUSE
10760	1336	G	A	Locus_28480.0|BlastHit|gi|341940628|sp|O09174.4|AMACR_MOUSE
10760	1357	T	C	Locus_28480.0|BlastHit|gi|341940628|sp|O09174.4|AMACR_MOUSE
10760	153	C	A	Locus_28480.0|BlastHit|gi|341940628|sp|O09174.4|AMACR_MOUSE
10760	472	T	C	Locus_28480.0|BlastHit|gi|341940628|sp|O09174.4|AMACR_MOUSE
10760	685	G	A	Locus_28480.0|BlastHit|gi|341940628|sp|O09174.4|AMACR_MOUSE
10760	874	G	A	Locus_28480.0|BlastHit|gi|341940628|sp|O09174.4|AMACR_MOUSE
10761	2116	C	T	Locus_28481.0|BlastHit|gi|81912790|sp|Q80VC6.2|TSAP1_MOUSE
10761	2275	G	A	Locus_28481.0|BlastHit|gi|81912790|sp|Q80VC6.2|TSAP1_MOUSE
10762	1185	C	A	Locus_28482.0|BlastHit|gi|586459|sp|P38166.1|SFT2_YEAST
10762	1746	T	G	Locus_28482.0|BlastHit|gi|586459|sp|P38166.1|SFT2_YEAST
10762	1910	T	C	Locus_28482.0|BlastHit|gi|586459|sp|P38166.1|SFT2_YEAST
10762	404	T	C	Locus_28482.0|BlastHit|gi|586459|sp|P38166.1|SFT2_YEAST
10762	485	C	G	Locus_28482.0|BlastHit|gi|586459|sp|P38166.1|SFT2_YEAST
10769	201	A	G	Locus_28488.0|BlastHit|gi|82200969|sp|Q6GLK6.1|ACSF3_XENLA
10769	2492	T	C	Locus_28488.0|BlastHit|gi|82200969|sp|Q6GLK6.1|ACSF3_XENLA
10771	638	C	T	Locus_28491.0|BlastHit|gi|585279|sp|Q08169.1|HUGA_APIME
10771	698	T	C	Locus_28491.0|BlastHit|gi|585279|sp|Q08169.1|HUGA_APIME
10771	87	G	C	Locus_28491.0|BlastHit|gi|585279|sp|Q08169.1|HUGA_APIME
10772	1381	C	T	Locus_28493.0|BlastHit|gi|75027588|sp|Q9VVA0.1|Y9705_DROME
10772	2503	A	T	Locus_28493.0|BlastHit|gi|75027588|sp|Q9VVA0.1|Y9705_DROME
10774	1164	T	C	Locus_28498.0|BlastHit|gi|29428062|sp|Q9VDE5.1|PPAN_DROME
10774	480	C	T	Locus_28498.0|BlastHit|gi|29428062|sp|Q9VDE5.1|PPAN_DROME
10774	630	A	G	Locus_28498.0|BlastHit|gi|29428062|sp|Q9VDE5.1|PPAN_DROME
10794	352	A	T	Locus_28506.0|BlastHit|gi|12585261|sp|Q9U639.1|HSP7D_MANSE
10795	163	T	C	Locus_28506.0|BlastHit|gi|12585261|sp|Q9U639.1|HSP7D_MANSE
10795	440	G	T	Locus_28506.0|BlastHit|gi|12585261|sp|Q9U639.1|HSP7D_MANSE
10795	51	G	A	Locus_28506.0|BlastHit|gi|12585261|sp|Q9U639.1|HSP7D_MANSE
10796	1936	G	C	Locus_28506.0|BlastHit|gi|12585261|sp|Q9U639.1|HSP7D_MANSE
10799	1274	C	T	Locus_28510.0|BlastHit|gi|71153569|sp|Q80X82.1|SYMPK_MOUSE
10799	1984	A	G	Locus_28510.0|BlastHit|gi|71153569|sp|Q80X82.1|SYMPK_MOUSE
10802	775	G	C	Locus_28514.0|BlastHit|gi|74748975|sp|Q6NT16.1|S18B1_HUMAN
10805	435	C	A	Locus_28516.1|BlastHit|gi|82179784|sp|Q5RGV1.1|IMDH3_DANRE
10807	5244	C	T	Locus_28517.1|BlastHit|gi|12643510|sp|Q61315.1|APC_MOUSE
10807	5247	G	A	Locus_28517.1|BlastHit|gi|12643510|sp|Q61315.1|APC_MOUSE
1080	840	G	A	Locus_7874.0|BlastHit|gi|29839346|sp|Q8HYW0.1|FA13A_BOVIN
10814	1706	G	C	Locus_28522.0|BlastHit|gi|82192787|sp|Q503M4.1|MT12B_DANRE
10814	2176	A	T	Locus_28522.0|BlastHit|gi|82192787|sp|Q503M4.1|MT12B_DANRE
10814	2221	C	T	Locus_28522.0|BlastHit|gi|82192787|sp|Q503M4.1|MT12B_DANRE
10814	233	G	A	Locus_28522.0|BlastHit|gi|82192787|sp|Q503M4.1|MT12B_DANRE
10815	3921	T	A	Locus_28523.0|BlastHit|gi|81878506|sp|Q8K2A1.1|GULP1_MOUSE
10817	1164	C	T	Locus_28525.0|BlastHit|gi|75026930|sp|Q9VGW6.1|MCM5_DROME
10817	795	T	C	Locus_28525.0|BlastHit|gi|75026930|sp|Q9VGW6.1|MCM5_DROME
10817	807	T	C	Locus_28525.0|BlastHit|gi|75026930|sp|Q9VGW6.1|MCM5_DROME
10819	918	T	A	Locus_28529.0|BlastHit|gi|82184061|sp|Q6GMG6.1|RFT2B_DANRE
10826	797	A	C	Locus_28533.0|BlastHit|gi|108860789|sp|Q2KIZ8.1|MCM6_BOVIN
10826	950	C	T	Locus_28533.0|BlastHit|gi|108860789|sp|Q2KIZ8.1|MCM6_BOVIN
10826	960	T	C	Locus_28533.0|BlastHit|gi|108860789|sp|Q2KIZ8.1|MCM6_BOVIN
10835	1255	A	C	Locus_28537.0|BlastHit|gi|82108178|sp|Q90X38.2|GPKOW_DANRE
10836	142	G	A	Locus_28538.0|BlastHit|gi|81873637|sp|Q8BFR4.1|GNS_MOUSE
10836	430	C	T	Locus_28538.0|BlastHit|gi|81873637|sp|Q8BFR4.1|GNS_MOUSE
10836	445	G	A	Locus_28538.0|BlastHit|gi|81873637|sp|Q8BFR4.1|GNS_MOUSE
10836	508	G	C	Locus_28538.0|BlastHit|gi|81873637|sp|Q8BFR4.1|GNS_MOUSE
10836	640	C	T	Locus_28538.0|BlastHit|gi|81873637|sp|Q8BFR4.1|GNS_MOUSE
10836	680	A	G	Locus_28538.0|BlastHit|gi|81873637|sp|Q8BFR4.1|GNS_MOUSE
10836	817	C	T	Locus_28538.0|BlastHit|gi|81873637|sp|Q8BFR4.1|GNS_MOUSE
10836	862	G	A	Locus_28538.0|BlastHit|gi|81873637|sp|Q8BFR4.1|GNS_MOUSE
10837	1181	A	G	Locus_28541.0|BlastHit|gi|82178433|sp|Q58EJ9.1|MOSC1_DANRE
10837	1455	G	A	Locus_28541.0|BlastHit|gi|82178433|sp|Q58EJ9.1|MOSC1_DANRE
10837	1596	T	A	Locus_28541.0|BlastHit|gi|82178433|sp|Q58EJ9.1|MOSC1_DANRE
10837	1748	G	A	Locus_28541.0|BlastHit|gi|82178433|sp|Q58EJ9.1|MOSC1_DANRE
10837	1820	G	C	Locus_28541.0|BlastHit|gi|82178433|sp|Q58EJ9.1|MOSC1_DANRE
10837	2041	A	T	Locus_28541.0|BlastHit|gi|82178433|sp|Q58EJ9.1|MOSC1_DANRE
10837	619	G	A	Locus_28541.0|BlastHit|gi|82178433|sp|Q58EJ9.1|MOSC1_DANRE
10837	742	T	C	Locus_28541.0|BlastHit|gi|82178433|sp|Q58EJ9.1|MOSC1_DANRE
10837	772	T	C	Locus_28541.0|BlastHit|gi|82178433|sp|Q58EJ9.1|MOSC1_DANRE
10837	799	C	A	Locus_28541.0|BlastHit|gi|82178433|sp|Q58EJ9.1|MOSC1_DANRE
10842	1315	T	C	Locus_28547.1|BlastHit|gi|123899020|sp|Q32NW2.1|LENG8_XENLA
10842	2996	A	G	Locus_28547.1|BlastHit|gi|123899020|sp|Q32NW2.1|LENG8_XENLA
10842	3666	T	G	Locus_28547.1|BlastHit|gi|123899020|sp|Q32NW2.1|LENG8_XENLA
10842	3668	A	T	Locus_28547.1|BlastHit|gi|123899020|sp|Q32NW2.1|LENG8_XENLA
10843	1267	T	C	Locus_28548.0|BlastHit|gi|7531124|sp|Q9WVF8.3|TUSC2_MOUSE
10844	1264	A	G	Locus_28549.0|BlastHit|gi|33518622|sp|Q9VHR8.2|DPP3_DROME
10844	1375	T	C	Locus_28549.0|BlastHit|gi|33518622|sp|Q9VHR8.2|DPP3_DROME
10844	2176	A	G	Locus_28549.0|BlastHit|gi|33518622|sp|Q9VHR8.2|DPP3_DROME
10844	388	A	T	Locus_28549.0|BlastHit|gi|33518622|sp|Q9VHR8.2|DPP3_DROME
10844	817	A	T	Locus_28549.0|BlastHit|gi|33518622|sp|Q9VHR8.2|DPP3_DROME
10844	919	T	G	Locus_28549.0|BlastHit|gi|33518622|sp|Q9VHR8.2|DPP3_DROME
10844	960	A	G	Locus_28549.0|BlastHit|gi|33518622|sp|Q9VHR8.2|DPP3_DROME
10850	304	G	C	Locus_28557.0|BlastHit|gi|342165388|sp|B0S5N4.2|PLXA3_DANRE
10850	307	C	T	Locus_28557.0|BlastHit|gi|342165388|sp|B0S5N4.2|PLXA3_DANRE
10852	1079	C	T	Locus_28559.0|BlastHit|gi|341941154|sp|P58058.2|NADK_MOUSE
10852	3663	A	G	Locus_28559.0|BlastHit|gi|341941154|sp|P58058.2|NADK_MOUSE
10853	1042	T	C	Locus_28560.0|BlastHit|gi|85540610|sp|Q8N187.2|AL2S8_HUMAN
10853	1090	T	C	Locus_28560.0|BlastHit|gi|85540610|sp|Q8N187.2|AL2S8_HUMAN
10857	552	C	T	Locus_28563.0|BlastHit|gi|296439475|sp|Q9NRY5.4|F1142_HUMAN
10857	744	C	T	Locus_28563.0|BlastHit|gi|296439475|sp|Q9NRY5.4|F1142_HUMAN
10859	1254	A	T	Locus_28565.0|BlastHit|gi|400239|sp|P31429.1|DPEP1_RABIT
10859	582	A	G	Locus_28565.0|BlastHit|gi|400239|sp|P31429.1|DPEP1_RABIT
10859	999	G	A	Locus_28565.0|BlastHit|gi|400239|sp|P31429.1|DPEP1_RABIT
10860	1554	A	G	Locus_28567.0|BlastHit|gi|8928549|sp|O75027.2|ABCB7_HUMAN
10860	1680	T	C	Locus_28567.0|BlastHit|gi|8928549|sp|O75027.2|ABCB7_HUMAN
10860	2049	C	T	Locus_28567.0|BlastHit|gi|8928549|sp|O75027.2|ABCB7_HUMAN
10860	2148	A	T	Locus_28567.0|BlastHit|gi|8928549|sp|O75027.2|ABCB7_HUMAN
10860	2149	T	G	Locus_28567.0|BlastHit|gi|8928549|sp|O75027.2|ABCB7_HUMAN
10861	306	C	T	Locus_28568.0|BlastHit|gi|75050397|sp|Q9MYY0.2|HPSE_BOVIN
10865	1368	C	A	Locus_28574.0|BlastHit|gi|13124177|sp|O61491.1|FLOT1_DROME
10865	183	C	G	Locus_28574.0|BlastHit|gi|13124177|sp|O61491.1|FLOT1_DROME
10865	369	T	C	Locus_28574.0|BlastHit|gi|13124177|sp|O61491.1|FLOT1_DROME
10865	435	A	G	Locus_28574.0|BlastHit|gi|13124177|sp|O61491.1|FLOT1_DROME
10865	795	C	T	Locus_28574.0|BlastHit|gi|13124177|sp|O61491.1|FLOT1_DROME
10866	178	G	C	Locus_28575.0|BlastHit|gi|417289|sp|Q00719.1|MDMC_STRMY
10866	181	C	G	Locus_28575.0|BlastHit|gi|417289|sp|Q00719.1|MDMC_STRMY
10867	166	G	T	Locus_28575.1|BlastHit|gi|75014084|sp|Q86IC8.1|CAMT2_DICDI
10867	241	A	C,G	Locus_28575.1|BlastHit|gi|75014084|sp|Q86IC8.1|CAMT2_DICDI
10867	310	A	G	Locus_28575.1|BlastHit|gi|75014084|sp|Q86IC8.1|CAMT2_DICDI
10867	313	T	C	Locus_28575.1|BlastHit|gi|75014084|sp|Q86IC8.1|CAMT2_DICDI
10869	1858	A	G	Locus_28577.0|BlastHit|gi|12643426|sp|O60779.2|S19A2_HUMAN
10870	315	C	T	Locus_28578.0|BlastHit|gi|13124624|sp|Q9V359.1|VPS28_DROME
10870	472	T	A	Locus_28578.0|BlastHit|gi|13124624|sp|Q9V359.1|VPS28_DROME
10870	885	A	T	Locus_28578.0|BlastHit|gi|13124624|sp|Q9V359.1|VPS28_DROME
10870	924	T	A	Locus_28578.0|BlastHit|gi|13124624|sp|Q9V359.1|VPS28_DROME
10870	987	C	T	Locus_28578.0|BlastHit|gi|13124624|sp|Q9V359.1|VPS28_DROME
10873	1059	A	G	Locus_28586.0|BlastHit|gi|59797902|sp|O75629.1|CREG1_HUMAN
10874	154	T	C	Locus_28587.0|BlastHit|gi|26006706|sp|Q8R1S0.2|COQ6_MOUSE
10874	289	C	T	Locus_28587.0|BlastHit|gi|26006706|sp|Q8R1S0.2|COQ6_MOUSE
10875	306	G	C	Locus_28587.1|BlastHit|gi|26006706|sp|Q8R1S0.2|COQ6_MOUSE
10875	341	C	A	Locus_28587.1|BlastHit|gi|26006706|sp|Q8R1S0.2|COQ6_MOUSE
10875	422	T	C	Locus_28587.1|BlastHit|gi|26006706|sp|Q8R1S0.2|COQ6_MOUSE
10875	860	G	A	Locus_28587.1|BlastHit|gi|26006706|sp|Q8R1S0.2|COQ6_MOUSE
10878	1001	A	G	Locus_28592.0|BlastHit|gi|123905256|sp|Q05B17.1|WDR48_XENTR
10878	554	A	G	Locus_28592.0|BlastHit|gi|123905256|sp|Q05B17.1|WDR48_XENTR
10878	983	A	G	Locus_28592.0|BlastHit|gi|123905256|sp|Q05B17.1|WDR48_XENTR
10882	1509	G	A	Locus_28595.0|BlastHit|gi|14286157|sp|Q01604.2|PGK_DROME
10883	3673	G	A	Locus_28597.0|BlastHit|gi|166214992|sp|Q6ZT12.2|UBR3_HUMAN
10884	154	T	C	Locus_28598.1|BlastHit|gi|547681|sp|Q06248.1|HSP74_PARLI
10884	16	G	A	Locus_28598.1|BlastHit|gi|547681|sp|Q06248.1|HSP74_PARLI
10884	203	C	T	Locus_28598.1|BlastHit|gi|547681|sp|Q06248.1|HSP74_PARLI
10884	252	T	C	Locus_28598.1|BlastHit|gi|547681|sp|Q06248.1|HSP74_PARLI
10884	303	G	C,A	Locus_28598.1|BlastHit|gi|547681|sp|Q06248.1|HSP74_PARLI
10893	25	T	C	Locus_28604.0|BlastHit|gi|38257780|sp|Q9NXK8.1|FXL12_HUMAN
10893	263	A	G	Locus_28604.0|BlastHit|gi|38257780|sp|Q9NXK8.1|FXL12_HUMAN
10893	32	A	G	Locus_28604.0|BlastHit|gi|38257780|sp|Q9NXK8.1|FXL12_HUMAN
10893	37	T	A	Locus_28604.0|BlastHit|gi|38257780|sp|Q9NXK8.1|FXL12_HUMAN
10893	40	A	G	Locus_28604.0|BlastHit|gi|38257780|sp|Q9NXK8.1|FXL12_HUMAN
10900	1677	A	G	Locus_28606.0|BlastHit|gi|12643739|sp|Q27597.2|NCPR_DROME
10900	1707	G	A	Locus_28606.0|BlastHit|gi|12643739|sp|Q27597.2|NCPR_DROME
10900	939	T	C	Locus_28606.0|BlastHit|gi|12643739|sp|Q27597.2|NCPR_DROME
10904	976	G	A	Locus_28613.0|BlastHit|gi|82081101|sp|Q5ZID2.1|PDD2L_CHICK
10907	1563	G	T,A	Locus_28615.0|BlastHit|gi|20455192|sp|Q9UKK9.1|NUDT5_HUMAN
10907	1749	T	G	Locus_28615.0|BlastHit|gi|20455192|sp|Q9UKK9.1|NUDT5_HUMAN
10908	899	T	G	Locus_28616.0|BlastHit|gi|114162|sp|P18824.1|ARM_DROME
10909	125	T	A,G	Locus_28617.0|BlastHit|gi|156630951|sp|A2BIG9.1|LSMD1_DANRE
10909	146	C	T	Locus_28617.0|BlastHit|gi|156630951|sp|A2BIG9.1|LSMD1_DANRE
10909	216	C	T	Locus_28617.0|BlastHit|gi|156630951|sp|A2BIG9.1|LSMD1_DANRE
10909	345	C	T	Locus_28617.0|BlastHit|gi|156630951|sp|A2BIG9.1|LSMD1_DANRE
10909	384	T	C	Locus_28617.0|BlastHit|gi|156630951|sp|A2BIG9.1|LSMD1_DANRE
10909	659	T	G	Locus_28617.0|BlastHit|gi|156630951|sp|A2BIG9.1|LSMD1_DANRE
10911	1112	C	T	Locus_28619.0|BlastHit|gi|1731402|sp|P50464.1|UNC97_CAEEL
10918	1024	A	G	Locus_28621.0|BlastHit|gi|38258618|sp|Q8VDQ8.2|SIR2_MOUSE
10918	1832	T	C	Locus_28621.0|BlastHit|gi|38258618|sp|Q8VDQ8.2|SIR2_MOUSE
10918	514	C	T	Locus_28621.0|BlastHit|gi|38258618|sp|Q8VDQ8.2|SIR2_MOUSE
10919	3285	C	T	Locus_28622.0|BlastHit|gi|121957111|sp|Q28EW0.1|TM87A_XENTR
10919	4608	A	G	Locus_28622.0|BlastHit|gi|121957111|sp|Q28EW0.1|TM87A_XENTR
10919	559	G	A	Locus_28622.0|BlastHit|gi|121957111|sp|Q28EW0.1|TM87A_XENTR
10921	824	G	A	Locus_28624.0|BlastHit|gi|83288219|sp|Q8R322.2|GLE1_MOUSE
10923	1271	G	T	Locus_28627.0|BlastHit|gi|52788305|sp|Q9Z2I9.2|SUCB1_MOUSE
10923	328	C	T	Locus_28627.0|BlastHit|gi|52788305|sp|Q9Z2I9.2|SUCB1_MOUSE
10923	651	C	T	Locus_28627.0|BlastHit|gi|52788305|sp|Q9Z2I9.2|SUCB1_MOUSE
10925	438	A	G	Locus_28629.0|BlastHit|gi|12231007|sp|P31944.2|CASPE_HUMAN
10931	1672	A	G	Locus_28639.0|BlastHit|gi|341940432|sp|Q9CWT6.2|DDX28_MOUSE
10951	1590	C	T	Locus_28641.0|BlastHit|gi|81917204|sp|Q9DC33.1|HM20A_MOUSE
10951	2049	G	C	Locus_28641.0|BlastHit|gi|81917204|sp|Q9DC33.1|HM20A_MOUSE
10952	1603	G	A	Locus_28644.0|BlastHit|gi|205831550|sp|Q03168.2|ASPP_AEDAE
10952	1922	G	A	Locus_28644.0|BlastHit|gi|205831550|sp|Q03168.2|ASPP_AEDAE
10952	390	T	C	Locus_28644.0|BlastHit|gi|205831550|sp|Q03168.2|ASPP_AEDAE
10952	528	C	G	Locus_28644.0|BlastHit|gi|205831550|sp|Q03168.2|ASPP_AEDAE
10955	1047	T	A	Locus_28648.1|BlastHit|gi|114150022|sp|Q7Z3D4.2|LYSM3_HUMAN
10955	1106	C	T	Locus_28648.1|BlastHit|gi|114150022|sp|Q7Z3D4.2|LYSM3_HUMAN
10955	506	T	G	Locus_28648.1|BlastHit|gi|114150022|sp|Q7Z3D4.2|LYSM3_HUMAN
10955	565	G	A	Locus_28648.1|BlastHit|gi|114150022|sp|Q7Z3D4.2|LYSM3_HUMAN
10955	990	C	T	Locus_28648.1|BlastHit|gi|114150022|sp|Q7Z3D4.2|LYSM3_HUMAN
10956	34	A	G	Locus_28650.0|BlastHit|gi|82582284|sp|Q6CQE5.2|TAR1_KLULA
10957	192	C	T	Locus_28650.0|BlastHit|gi|74644329|sp|Q8TGM6.1|TAR1_YEAST
10961	995	T	G	Locus_28651.0|BlastHit|gi|92087007|sp|O75897.2|ST1C4_HUMAN
10963	1236	C	T	Locus_28654.0|BlastHit|gi|20532206|sp|O75832.1|PSD10_HUMAN
10966	433	A	G	Locus_28659.0|BlastHit|gi|121940968|sp|Q24JQ0.1|TM241_HUMAN
10968	119	A	C	Locus_28661.0|BlastHit|gi|190358876|sp|Q7SXP2.2|ULA1_DANRE
10968	292	C	T	Locus_28661.0|BlastHit|gi|190358876|sp|Q7SXP2.2|ULA1_DANRE
10968	406	C	T	Locus_28661.0|BlastHit|gi|190358876|sp|Q7SXP2.2|ULA1_DANRE
10968	445	C	T	Locus_28661.0|BlastHit|gi|190358876|sp|Q7SXP2.2|ULA1_DANRE
10969	107	A	G	Locus_28662.0|BlastHit|gi|82000231|sp|Q5UQN4.1|YL432_MIMIV
10969	123	G	A	Locus_28662.0|BlastHit|gi|82000231|sp|Q5UQN4.1|YL432_MIMIV
10969	242	T	C	Locus_28662.0|BlastHit|gi|82000231|sp|Q5UQN4.1|YL432_MIMIV
1097	485	C	T	Locus_7939.0|BlastHit|gi|400525|sp|Q02372.1|NDUB8_BOVIN
1097	509	C	T,G	Locus_7939.0|BlastHit|gi|400525|sp|Q02372.1|NDUB8_BOVIN
1097	594	G	A	Locus_7939.0|BlastHit|gi|400525|sp|Q02372.1|NDUB8_BOVIN
10981	422	C	G	Locus_28670.0|BlastHit|gi|189081212|sp|A6QLU7.1|F115C_BOVIN
10981	752	C	T	Locus_28670.0|BlastHit|gi|189081212|sp|A6QLU7.1|F115C_BOVIN
10981	803	T	C	Locus_28670.0|BlastHit|gi|189081212|sp|A6QLU7.1|F115C_BOVIN
10983	2436	A	G	Locus_28672.0|BlastHit|gi|34395789|sp|Q8TC12.2|RDH11_HUMAN
10983	250	C	A	Locus_28672.0|BlastHit|gi|34395789|sp|Q8TC12.2|RDH11_HUMAN
10983	965	G	A	Locus_28672.0|BlastHit|gi|34395789|sp|Q8TC12.2|RDH11_HUMAN
10989	1579	A	G	Locus_28680.0|BlastHit|gi|23396778|sp|Q9GZU5.1|NYX_HUMAN
1098	148	A	G	Locus_7943.0|BlastHit|gi|6093786|sp|O73817.1|PSB3_ONCMY
10990	1166	G	T	Locus_28680.0|BlastHit|gi|23396778|sp|Q9GZU5.1|NYX_HUMAN
10991	1384	A	G	Locus_28684.0|BlastHit|gi|187609599|sp|A7SMW7.1|L2HDH_NEMVE
10991	1999	C	G,T	Locus_28684.0|BlastHit|gi|187609599|sp|A7SMW7.1|L2HDH_NEMVE
10991	59	A	G	Locus_28684.0|BlastHit|gi|187609599|sp|A7SMW7.1|L2HDH_NEMVE
10991	759	T	C	Locus_28684.0|BlastHit|gi|187609599|sp|A7SMW7.1|L2HDH_NEMVE
10994	1073	C	G	Locus_28687.0|BlastHit|gi|62900602|sp|Q9V6U9.2|MECR_DROME
10994	464	G	A	Locus_28687.0|BlastHit|gi|62900602|sp|Q9V6U9.2|MECR_DROME
10994	650	A	C	Locus_28687.0|BlastHit|gi|62900602|sp|Q9V6U9.2|MECR_DROME
10994	665	G	A	Locus_28687.0|BlastHit|gi|62900602|sp|Q9V6U9.2|MECR_DROME
10994	986	T	C	Locus_28687.0|BlastHit|gi|62900602|sp|Q9V6U9.2|MECR_DROME
10996	2271	G	A	Locus_28689.0|BlastHit|gi|81873757|sp|Q8BH24.1|TM9S4_MOUSE
10996	661	T	C	Locus_28689.0|BlastHit|gi|81873757|sp|Q8BH24.1|TM9S4_MOUSE
10999	1065	T	C	Locus_28692.0|BlastHit|gi|296434442|sp|Q16880.2|CGT_HUMAN
10999	1209	G	A	Locus_28692.0|BlastHit|gi|296434442|sp|Q16880.2|CGT_HUMAN
10999	1225	T	C	Locus_28692.0|BlastHit|gi|296434442|sp|Q16880.2|CGT_HUMAN
10999	1412	G	A	Locus_28692.0|BlastHit|gi|296434442|sp|Q16880.2|CGT_HUMAN
10999	896	G	A	Locus_28692.0|BlastHit|gi|296434442|sp|Q16880.2|CGT_HUMAN
11001	523	A	G	Locus_28693.0|BlastHit|gi|6016127|sp|Q92820.2|GGH_HUMAN
11005	682	T	C	Locus_28700.0|BlastHit|gi|32699688|sp|Q9VF89.1|RM09_DROME
11005	76	T	A	Locus_28700.0|BlastHit|gi|32699688|sp|Q9VF89.1|RM09_DROME
11006	1086	A	G	Locus_28701.0|BlastHit|gi|122135265|sp|Q29RI9.1|MAT2B_BOVIN
11006	1130	T	G	Locus_28701.0|BlastHit|gi|122135265|sp|Q29RI9.1|MAT2B_BOVIN
11006	1344	C	A	Locus_28701.0|BlastHit|gi|122135265|sp|Q29RI9.1|MAT2B_BOVIN
11006	1639	T	A	Locus_28701.0|BlastHit|gi|122135265|sp|Q29RI9.1|MAT2B_BOVIN
11006	664	C	T	Locus_28701.0|BlastHit|gi|122135265|sp|Q29RI9.1|MAT2B_BOVIN
11006	783	T	G	Locus_28701.0|BlastHit|gi|122135265|sp|Q29RI9.1|MAT2B_BOVIN
11006	786	C	T	Locus_28701.0|BlastHit|gi|122135265|sp|Q29RI9.1|MAT2B_BOVIN
11006	798	G	A	Locus_28701.0|BlastHit|gi|122135265|sp|Q29RI9.1|MAT2B_BOVIN
11006	897	G	A	Locus_28701.0|BlastHit|gi|122135265|sp|Q29RI9.1|MAT2B_BOVIN
11007	526	A	C	Locus_28702.0|BlastHit|gi|114160|sp|P20673.1|ARLY_RAT
11008	1005	A	G	Locus_28703.1|BlastHit|gi|110282935|sp|P20004.4|ACON_BOVIN
11008	1131	G	A	Locus_28703.1|BlastHit|gi|110282935|sp|P20004.4|ACON_BOVIN
11008	1302	A	C	Locus_28703.1|BlastHit|gi|110282935|sp|P20004.4|ACON_BOVIN
11008	138	G	A	Locus_28703.1|BlastHit|gi|110282935|sp|P20004.4|ACON_BOVIN
11008	2169	T	C	Locus_28703.1|BlastHit|gi|110282935|sp|P20004.4|ACON_BOVIN
11008	627	G	C	Locus_28703.1|BlastHit|gi|110282935|sp|P20004.4|ACON_BOVIN
11008	638	C	T	Locus_28703.1|BlastHit|gi|110282935|sp|P20004.4|ACON_BOVIN
11008	735	A	G	Locus_28703.1|BlastHit|gi|110282935|sp|P20004.4|ACON_BOVIN
11008	79	C	T	Locus_28703.1|BlastHit|gi|110282935|sp|P20004.4|ACON_BOVIN
11011	140	T	A	Locus_28706.0|BlastHit|gi|51316457|sp|Q8C0L6.3|PAOX_MOUSE
11015	821	T	C	Locus_28710.0|BlastHit|gi|121284|sp|P17439.1|GLCM_MOUSE
11016	123	G	A	Locus_28710.0|BlastHit|gi|75041551|sp|Q5R8E3.1|GLCM_PONAB
11018	1050	G	A	Locus_28713.0|BlastHit|gi|20177939|sp|Q9NZ01.1|TECR_HUMAN
11018	1404	G	A	Locus_28713.0|BlastHit|gi|20177939|sp|Q9NZ01.1|TECR_HUMAN
11018	335	A	C	Locus_28713.0|BlastHit|gi|20177939|sp|Q9NZ01.1|TECR_HUMAN
11018	886	G	A	Locus_28713.0|BlastHit|gi|20177939|sp|Q9NZ01.1|TECR_HUMAN
11018	896	A	G	Locus_28713.0|BlastHit|gi|20177939|sp|Q9NZ01.1|TECR_HUMAN
11019	853	C	T	Locus_28714.0|BlastHit|gi|182676601|sp|A5PJ65.2|RER1_BOVIN
11019	94	T	C	Locus_28714.0|BlastHit|gi|182676601|sp|A5PJ65.2|RER1_BOVIN
11021	381	C	T	Locus_28718.0|BlastHit|gi|77416569|sp|Q7T3C7.2|RT4I1_DANRE
11021	390	T	C	Locus_28718.0|BlastHit|gi|77416569|sp|Q7T3C7.2|RT4I1_DANRE
11021	441	T	G	Locus_28718.0|BlastHit|gi|77416569|sp|Q7T3C7.2|RT4I1_DANRE
11021	86	G	T	Locus_28718.0|BlastHit|gi|77416569|sp|Q7T3C7.2|RT4I1_DANRE
11028	3497	A	T	Locus_28723.0|BlastHit|gi|6094466|sp|Q28864.1|TFPI1_MACMU
11028	3715	T	C	Locus_28723.0|BlastHit|gi|6094466|sp|Q28864.1|TFPI1_MACMU
11037	1580	T	A	Locus_28728.0|BlastHit|gi|82178135|sp|Q567I4.1|PLCX1_DANRE
11056	2565	C	A	Locus_28733.0|BlastHit|gi|82082163|sp|Q5ZKJ4.1|FGOP2_CHICK
11056	3001	C	T	Locus_28733.0|BlastHit|gi|82082163|sp|Q5ZKJ4.1|FGOP2_CHICK
11057	1389	T	C	Locus_28734.0|BlastHit|gi|51316882|sp|Q8WVM8.4|SCFD1_HUMAN
11057	1437	C	T	Locus_28734.0|BlastHit|gi|51316882|sp|Q8WVM8.4|SCFD1_HUMAN
11057	1722	T	C	Locus_28734.0|BlastHit|gi|51316882|sp|Q8WVM8.4|SCFD1_HUMAN
11057	2354	T	C	Locus_28734.0|BlastHit|gi|51316882|sp|Q8WVM8.4|SCFD1_HUMAN
11057	747	G	A	Locus_28734.0|BlastHit|gi|51316882|sp|Q8WVM8.4|SCFD1_HUMAN
11057	911	G	A	Locus_28734.0|BlastHit|gi|51316882|sp|Q8WVM8.4|SCFD1_HUMAN
11067	1040	T	C	Locus_28742.0|BlastHit|gi|74705530|sp|O15504.1|NUPL2_HUMAN
11092	585	C	A	Locus_28745.0|BlastHit|gi|136643|sp|P25867.1|UBCD1_DROME
11094	1339	T	C	Locus_28745.1|BlastHit|gi|1703039|sp|P53001.1|AAT1_BACSU
11094	1510	T	C	Locus_28745.1|BlastHit|gi|1703039|sp|P53001.1|AAT1_BACSU
11096	1808	C	A	Locus_28745.3|BlastHit|gi|73919224|sp|Q6PH85.1|DCNL2_HUMAN
11108	156	G	A	Locus_28751.0|BlastHit|gi|212276422|sp|P51689.2|ARSD_HUMAN
11108	73	G	C	Locus_28751.0|BlastHit|gi|212276422|sp|P51689.2|ARSD_HUMAN
11110	1416	G	C	Locus_28752.0|BlastHit|gi|73921653|sp|Q9GLN7.1|ACE_PANTR
11110	1525	C	T	Locus_28752.0|BlastHit|gi|73921653|sp|Q9GLN7.1|ACE_PANTR
11110	267	T	A	Locus_28752.0|BlastHit|gi|73921653|sp|Q9GLN7.1|ACE_PANTR
11110	292	C	T	Locus_28752.0|BlastHit|gi|73921653|sp|Q9GLN7.1|ACE_PANTR
11110	3027	A	C	Locus_28752.0|BlastHit|gi|73921653|sp|Q9GLN7.1|ACE_PANTR
11110	3978	G	A	Locus_28752.0|BlastHit|gi|73921653|sp|Q9GLN7.1|ACE_PANTR
11110	4110	G	A	Locus_28752.0|BlastHit|gi|73921653|sp|Q9GLN7.1|ACE_PANTR
11110	4572	C	T	Locus_28752.0|BlastHit|gi|73921653|sp|Q9GLN7.1|ACE_PANTR
11110	4827	C	T	Locus_28752.0|BlastHit|gi|73921653|sp|Q9GLN7.1|ACE_PANTR
11110	4952	T	C	Locus_28752.0|BlastHit|gi|73921653|sp|Q9GLN7.1|ACE_PANTR
11110	5043	C	G	Locus_28752.0|BlastHit|gi|73921653|sp|Q9GLN7.1|ACE_PANTR
11110	574	T	C	Locus_28752.0|BlastHit|gi|73921653|sp|Q9GLN7.1|ACE_PANTR
11115	1066	C	G	Locus_28757.0|BlastHit|gi|238065895|sp|B5SNZ6.1|ABRA_PIG
11115	1199	T	C	Locus_28757.0|BlastHit|gi|238065895|sp|B5SNZ6.1|ABRA_PIG
11115	155	T	A	Locus_28757.0|BlastHit|gi|238065895|sp|B5SNZ6.1|ABRA_PIG
11115	311	A	G	Locus_28757.0|BlastHit|gi|238065895|sp|B5SNZ6.1|ABRA_PIG
11115	404	T	A	Locus_28757.0|BlastHit|gi|238065895|sp|B5SNZ6.1|ABRA_PIG
11115	445	C	T	Locus_28757.0|BlastHit|gi|238065895|sp|B5SNZ6.1|ABRA_PIG
11115	484	G	A	Locus_28757.0|BlastHit|gi|238065895|sp|B5SNZ6.1|ABRA_PIG
11115	886	T	A	Locus_28757.0|BlastHit|gi|238065895|sp|B5SNZ6.1|ABRA_PIG
11116	3186	C	T	Locus_28758.1|BlastHit|gi|75070497|sp|Q5R5V4.1|ILK_PONAB
11116	3207	T	A	Locus_28758.1|BlastHit|gi|75070497|sp|Q5R5V4.1|ILK_PONAB
11116	3597	G	A	Locus_28758.1|BlastHit|gi|75070497|sp|Q5R5V4.1|ILK_PONAB
11116	3621	C	T	Locus_28758.1|BlastHit|gi|75070497|sp|Q5R5V4.1|ILK_PONAB
11119	1333	C	T	Locus_28764.0|BlastHit|gi|74948427|sp|Q9VRP9.2|BRE1_DROME
11119	1351	A	G	Locus_28764.0|BlastHit|gi|74948427|sp|Q9VRP9.2|BRE1_DROME
11119	559	C	T	Locus_28764.0|BlastHit|gi|74948427|sp|Q9VRP9.2|BRE1_DROME
11124	1740	C	A	Locus_28769.0|BlastHit|gi|129688|sp|P21902.1|PCE_TACTR
11126	384	A	G	Locus_28772.0|BlastHit|gi|182701417|sp|Q5EA11.2|TTC4_BOVIN
11126	723	A	G	Locus_28772.0|BlastHit|gi|182701417|sp|Q5EA11.2|TTC4_BOVIN
11126	804	A	G	Locus_28772.0|BlastHit|gi|182701417|sp|Q5EA11.2|TTC4_BOVIN
11128	2038	C	T	Locus_28776.0|BlastHit|gi|85681028|sp|Q13948.2|CASP_HUMAN
11128	2092	A	G	Locus_28776.0|BlastHit|gi|85681028|sp|Q13948.2|CASP_HUMAN
11128	766	G	A	Locus_28776.0|BlastHit|gi|85681028|sp|Q13948.2|CASP_HUMAN
11129	1124	C	T,G	Locus_28778.0|BlastHit|gi|121755|sp|P11167.1|GTR1_RAT
11129	1500	T	C	Locus_28778.0|BlastHit|gi|121755|sp|P11167.1|GTR1_RAT
11129	275	A	G	Locus_28778.0|BlastHit|gi|121755|sp|P11167.1|GTR1_RAT
11129	634	C	T	Locus_28778.0|BlastHit|gi|121755|sp|P11167.1|GTR1_RAT
11130	190	G	T	Locus_28779.1|BlastHit|gi|158564054|sp|Q8C341.3|OSPT_MOUSE
11131	344	C	A	Locus_28780.0|BlastHit|gi|74872350|sp|Q9W2D6.1|TIM10_DROME
11131	376	C	A	Locus_28780.0|BlastHit|gi|74872350|sp|Q9W2D6.1|TIM10_DROME
11131	536	C	G	Locus_28780.0|BlastHit|gi|74872350|sp|Q9W2D6.1|TIM10_DROME
11131	838	T	A	Locus_28780.0|BlastHit|gi|74872350|sp|Q9W2D6.1|TIM10_DROME
11131	871	G	A	Locus_28780.0|BlastHit|gi|74872350|sp|Q9W2D6.1|TIM10_DROME
11132	1395	A	G	Locus_28781.0|BlastHit|gi|82228534|sp|Q4V842.1|GPTC4_XENLA
11132	379	T	A	Locus_28781.0|BlastHit|gi|82228534|sp|Q4V842.1|GPTC4_XENLA
11132	653	C	T	Locus_28781.0|BlastHit|gi|82228534|sp|Q4V842.1|GPTC4_XENLA
11132	825	C	T	Locus_28781.0|BlastHit|gi|82228534|sp|Q4V842.1|GPTC4_XENLA
11140	591	G	A	Locus_28784.0|BlastHit|gi|221222504|sp|Q293F6.2|SSRP1_DROPS
11140	732	A	G	Locus_28784.0|BlastHit|gi|221222504|sp|Q293F6.2|SSRP1_DROPS
11142	1869	G	T	Locus_28790.0|BlastHit|gi|296452981|sp|Q8N392.3|RHG18_HUMAN
11143	1398	T	C	Locus_28791.0|BlastHit|gi|85681897|sp|Q9Z2I8.3|SUCB2_MOUSE
11143	1581	G	A	Locus_28791.0|BlastHit|gi|85681897|sp|Q9Z2I8.3|SUCB2_MOUSE
11143	1980	T	C	Locus_28791.0|BlastHit|gi|85681897|sp|Q9Z2I8.3|SUCB2_MOUSE
11143	415	T	C	Locus_28791.0|BlastHit|gi|85681897|sp|Q9Z2I8.3|SUCB2_MOUSE
11149	1118	G	A	Locus_28796.0|BlastHit|gi|110287795|sp|Q2HJ56.1|PWP1_BOVIN
11149	1119	T	C	Locus_28796.0|BlastHit|gi|110287795|sp|Q2HJ56.1|PWP1_BOVIN
11149	1717	G	A	Locus_28796.0|BlastHit|gi|110287795|sp|Q2HJ56.1|PWP1_BOVIN
11149	984	G	A	Locus_28796.0|BlastHit|gi|110287795|sp|Q2HJ56.1|PWP1_BOVIN
11152	165	G	A	Locus_28797.0|BlastHit|gi|122142874|sp|Q2TU62.1|CLCA1_HORSE
11152	725	A	G	Locus_28797.0|BlastHit|gi|122142874|sp|Q2TU62.1|CLCA1_HORSE
11155	432	T	C	Locus_28800.0|BlastHit|gi|205371857|sp|P90850.3|YCF2E_CAEEL
11156	150	G	A	Locus_28801.0|BlastHit|gi|68566025|sp|Q5TUE9.1|RM23_ANOGA
11156	241	C	T	Locus_28801.0|BlastHit|gi|68566025|sp|Q5TUE9.1|RM23_ANOGA
11156	258	T	C	Locus_28801.0|BlastHit|gi|68566025|sp|Q5TUE9.1|RM23_ANOGA
11156	343	A	G	Locus_28801.0|BlastHit|gi|68566025|sp|Q5TUE9.1|RM23_ANOGA
11156	363	C	G	Locus_28801.0|BlastHit|gi|68566025|sp|Q5TUE9.1|RM23_ANOGA
11156	507	T	A	Locus_28801.0|BlastHit|gi|68566025|sp|Q5TUE9.1|RM23_ANOGA
11156	515	G	T	Locus_28801.0|BlastHit|gi|68566025|sp|Q5TUE9.1|RM23_ANOGA
11156	813	G	C	Locus_28801.0|BlastHit|gi|68566025|sp|Q5TUE9.1|RM23_ANOGA
11156	839	G	A	Locus_28801.0|BlastHit|gi|68566025|sp|Q5TUE9.1|RM23_ANOGA
11157	1560	T	G	Locus_28803.0|BlastHit|gi|19859536|sp|P42573.2|CED3_CAEEL
11157	178	T	G	Locus_28803.0|BlastHit|gi|19859536|sp|P42573.2|CED3_CAEEL
11157	903	T	C	Locus_28803.0|BlastHit|gi|19859536|sp|P42573.2|CED3_CAEEL
11157	966	C	G	Locus_28803.0|BlastHit|gi|19859536|sp|P42573.2|CED3_CAEEL
11159	1201	C	T	Locus_28806.0|BlastHit|gi|166977631|sp|A5A761.1|SFXN1_PIG
11159	130	C	G	Locus_28806.0|BlastHit|gi|166977631|sp|A5A761.1|SFXN1_PIG
11159	360	C	T	Locus_28806.0|BlastHit|gi|166977631|sp|A5A761.1|SFXN1_PIG
11159	931	A	G	Locus_28806.0|BlastHit|gi|166977631|sp|A5A761.1|SFXN1_PIG
11160	1177	T	A	Locus_28808.0|BlastHit|gi|162416065|sp|A4IHG1.1|LRC58_XENTR
11160	1288	T	G	Locus_28808.0|BlastHit|gi|162416065|sp|A4IHG1.1|LRC58_XENTR
11160	1306	T	C	Locus_28808.0|BlastHit|gi|162416065|sp|A4IHG1.1|LRC58_XENTR
11160	1432	C	T	Locus_28808.0|BlastHit|gi|162416065|sp|A4IHG1.1|LRC58_XENTR
11160	1450	T	G	Locus_28808.0|BlastHit|gi|162416065|sp|A4IHG1.1|LRC58_XENTR
11160	1838	G	A	Locus_28808.0|BlastHit|gi|162416065|sp|A4IHG1.1|LRC58_XENTR
11160	221	T	A	Locus_28808.0|BlastHit|gi|162416065|sp|A4IHG1.1|LRC58_XENTR
11160	371	A	T	Locus_28808.0|BlastHit|gi|162416065|sp|A4IHG1.1|LRC58_XENTR
11160	477	C	T	Locus_28808.0|BlastHit|gi|162416065|sp|A4IHG1.1|LRC58_XENTR
11160	481	C	G	Locus_28808.0|BlastHit|gi|162416065|sp|A4IHG1.1|LRC58_XENTR
11160	521	G	A	Locus_28808.0|BlastHit|gi|162416065|sp|A4IHG1.1|LRC58_XENTR
11160	648	T	C	Locus_28808.0|BlastHit|gi|162416065|sp|A4IHG1.1|LRC58_XENTR
11160	677	G	A	Locus_28808.0|BlastHit|gi|162416065|sp|A4IHG1.1|LRC58_XENTR
11160	744	A	T	Locus_28808.0|BlastHit|gi|162416065|sp|A4IHG1.1|LRC58_XENTR
11160	754	C	T	Locus_28808.0|BlastHit|gi|162416065|sp|A4IHG1.1|LRC58_XENTR
11160	915	C	A	Locus_28808.0|BlastHit|gi|162416065|sp|A4IHG1.1|LRC58_XENTR
11160	98	T	A	Locus_28808.0|BlastHit|gi|162416065|sp|A4IHG1.1|LRC58_XENTR
11160	99	A	C	Locus_28808.0|BlastHit|gi|162416065|sp|A4IHG1.1|LRC58_XENTR
11161	1092	T	A	Locus_28809.0|BlastHit|gi|62298570|sp|Q8NBN7.2|RDH13_HUMAN
11161	1638	T	A	Locus_28809.0|BlastHit|gi|62298570|sp|Q8NBN7.2|RDH13_HUMAN
11162	203	G	T	Locus_28810.0|BlastHit|gi|81880060|sp|Q99JW2.1|ACY1_MOUSE
11162	406	A	C	Locus_28810.0|BlastHit|gi|81880060|sp|Q99JW2.1|ACY1_MOUSE
11162	505	G	A	Locus_28810.0|BlastHit|gi|81880060|sp|Q99JW2.1|ACY1_MOUSE
11162	799	C	T	Locus_28810.0|BlastHit|gi|81880060|sp|Q99JW2.1|ACY1_MOUSE
11163	312	C	T	Locus_28810.1|BlastHit|gi|74858755|sp|Q55DP8.1|ACY1_DICDI
11169	3077	C	T	Locus_28814.0|BlastHit|gi|73915340|sp|Q8N0W3.2|FUK_HUMAN
11172	2341	T	C	Locus_28816.0|BlastHit|gi|20139135|sp|Q9C5Y0.2|PLDD1_ARATH
11172	2386	T	C	Locus_28816.0|BlastHit|gi|20139135|sp|Q9C5Y0.2|PLDD1_ARATH
11172	3947	G	C	Locus_28816.0|BlastHit|gi|20139135|sp|Q9C5Y0.2|PLDD1_ARATH
11172	4129	G	A	Locus_28816.0|BlastHit|gi|20139135|sp|Q9C5Y0.2|PLDD1_ARATH
11172	4142	C	T	Locus_28816.0|BlastHit|gi|20139135|sp|Q9C5Y0.2|PLDD1_ARATH
11176	1226	A	G	Locus_28821.0|BlastHit|gi|1711604|sp|P49888.1|ST1E1_HUMAN
11176	483	C	A,T	Locus_28821.0|BlastHit|gi|1711604|sp|P49888.1|ST1E1_HUMAN
11176	594	G	A	Locus_28821.0|BlastHit|gi|1711604|sp|P49888.1|ST1E1_HUMAN
11178	1031	C	T	Locus_28824.0|BlastHit|gi|114791|sp|P13808.1|B3A2_MOUSE
11178	1050	C	T	Locus_28824.0|BlastHit|gi|114791|sp|P13808.1|B3A2_MOUSE
11178	1395	A	T	Locus_28824.0|BlastHit|gi|114791|sp|P13808.1|B3A2_MOUSE
11178	2175	G	A	Locus_28824.0|BlastHit|gi|114791|sp|P13808.1|B3A2_MOUSE
11178	2865	T	C	Locus_28824.0|BlastHit|gi|114791|sp|P13808.1|B3A2_MOUSE
11179	1840	C	T	Locus_28825.0|BlastHit|gi|296434442|sp|Q16880.2|CGT_HUMAN
11179	618	T	C	Locus_28825.0|BlastHit|gi|296434442|sp|Q16880.2|CGT_HUMAN
11180	455	A	C	Locus_28829.0|BlastHit|gi|81905645|sp|Q9D8F1.1|ALKB4_MOUSE
11184	1978	T	C	Locus_28832.0|BlastHit|gi|221222448|sp|A6QM00.2|GADL1_BOVIN
11184	630	A	T	Locus_28832.0|BlastHit|gi|221222448|sp|A6QM00.2|GADL1_BOVIN
11190	1066	A	G	Locus_28840.0|BlastHit|gi|27151704|sp|Q9Y6N5.1|SQRD_HUMAN
11190	1096	C	T	Locus_28840.0|BlastHit|gi|27151704|sp|Q9Y6N5.1|SQRD_HUMAN
11190	1219	G	A	Locus_28840.0|BlastHit|gi|27151704|sp|Q9Y6N5.1|SQRD_HUMAN
11190	1306	C	T	Locus_28840.0|BlastHit|gi|27151704|sp|Q9Y6N5.1|SQRD_HUMAN
11190	158	C	T	Locus_28840.0|BlastHit|gi|27151704|sp|Q9Y6N5.1|SQRD_HUMAN
11190	1655	T	C	Locus_28840.0|BlastHit|gi|27151704|sp|Q9Y6N5.1|SQRD_HUMAN
11190	1750	T	A	Locus_28840.0|BlastHit|gi|27151704|sp|Q9Y6N5.1|SQRD_HUMAN
11190	1759	C	T	Locus_28840.0|BlastHit|gi|27151704|sp|Q9Y6N5.1|SQRD_HUMAN
11190	1839	C	T	Locus_28840.0|BlastHit|gi|27151704|sp|Q9Y6N5.1|SQRD_HUMAN
11190	751	G	A	Locus_28840.0|BlastHit|gi|27151704|sp|Q9Y6N5.1|SQRD_HUMAN
11190	969	T	C	Locus_28840.0|BlastHit|gi|27151704|sp|Q9Y6N5.1|SQRD_HUMAN
11197	1033	T	C	Locus_28843.0|BlastHit|gi|93138713|sp|Q3V1U8.2|ELMD1_MOUSE
11197	712	G	A	Locus_28843.0|BlastHit|gi|93138713|sp|Q3V1U8.2|ELMD1_MOUSE
11199	1198	C	T	Locus_28845.0|BlastHit|gi|73620030|sp|Q5T6V5.1|CI064_HUMAN
11199	2389	A	G	Locus_28845.0|BlastHit|gi|73620030|sp|Q5T6V5.1|CI064_HUMAN
11199	397	C	T	Locus_28845.0|BlastHit|gi|73620030|sp|Q5T6V5.1|CI064_HUMAN
11202	2384	A	G	Locus_28851.0|BlastHit|gi|71153763|sp|Q9CZU3.1|SK2L2_MOUSE
11202	2909	A	G	Locus_28851.0|BlastHit|gi|71153763|sp|Q9CZU3.1|SK2L2_MOUSE
11202	3506	T	C	Locus_28851.0|BlastHit|gi|71153763|sp|Q9CZU3.1|SK2L2_MOUSE
11209	91	G	A	Locus_28853.0|BlastHit|gi|300681185|sp|B0WC46.1|TRET1_CULQU
11212	1550	T	C	Locus_28857.1|BlastHit|gi|296439506|sp|Q92616.6|GCN1L_HUMAN
11212	2042	T	C	Locus_28857.1|BlastHit|gi|296439506|sp|Q92616.6|GCN1L_HUMAN
11212	2978	C	A	Locus_28857.1|BlastHit|gi|296439506|sp|Q92616.6|GCN1L_HUMAN
11212	4298	T	C	Locus_28857.1|BlastHit|gi|296439506|sp|Q92616.6|GCN1L_HUMAN
11212	5465	A	G	Locus_28857.1|BlastHit|gi|296439506|sp|Q92616.6|GCN1L_HUMAN
11212	5815	T	A	Locus_28857.1|BlastHit|gi|296439506|sp|Q92616.6|GCN1L_HUMAN
11216	1012	G	A	Locus_28860.1|BlastHit|gi|74947739|sp|Q9VC61.2|CRERF_DROME
11216	1780	A	G	Locus_28860.1|BlastHit|gi|74947739|sp|Q9VC61.2|CRERF_DROME
11216	292	A	G	Locus_28860.1|BlastHit|gi|74947739|sp|Q9VC61.2|CRERF_DROME
11216	3723	G	A	Locus_28860.1|BlastHit|gi|74947739|sp|Q9VC61.2|CRERF_DROME
11216	3982	A	C,T	Locus_28860.1|BlastHit|gi|74947739|sp|Q9VC61.2|CRERF_DROME
11216	4037	C	T	Locus_28860.1|BlastHit|gi|74947739|sp|Q9VC61.2|CRERF_DROME
11216	4918	A	G	Locus_28860.1|BlastHit|gi|74947739|sp|Q9VC61.2|CRERF_DROME
11217	1325	T	A	Locus_28861.0|BlastHit|gi|46396416|sp|Q8CCN1.1|NAL10_MOUSE
11217	2105	T	C	Locus_28861.0|BlastHit|gi|46396416|sp|Q8CCN1.1|NAL10_MOUSE
11217	2110	C	T	Locus_28861.0|BlastHit|gi|46396416|sp|Q8CCN1.1|NAL10_MOUSE
11217	2133	A	T	Locus_28861.0|BlastHit|gi|46396416|sp|Q8CCN1.1|NAL10_MOUSE
11217	2494	T	C	Locus_28861.0|BlastHit|gi|46396416|sp|Q8CCN1.1|NAL10_MOUSE
11218	1406	C	T	Locus_28862.0|BlastHit|gi|51316109|sp|Q9QZN4.1|FBX6_MOUSE
11218	842	T	C	Locus_28862.0|BlastHit|gi|51316109|sp|Q9QZN4.1|FBX6_MOUSE
11232	1491	G	A	Locus_28869.0|BlastHit|gi|123898938|sp|Q32NG4.1|PDDC1_XENLA
11257	1595	A	C	Locus_28875.0|BlastHit|gi|122135053|sp|Q24K02.1|IDE_BOVIN
11257	2447	C	T	Locus_28875.0|BlastHit|gi|122135053|sp|Q24K02.1|IDE_BOVIN
11257	2623	C	T	Locus_28875.0|BlastHit|gi|122135053|sp|Q24K02.1|IDE_BOVIN
11257	2963	A	T	Locus_28875.0|BlastHit|gi|122135053|sp|Q24K02.1|IDE_BOVIN
11262	1435	G	A	Locus_28881.0|BlastHit|gi|66774221|sp|Q9CZR2.2|NALD2_MOUSE
11262	2292	C	T	Locus_28881.0|BlastHit|gi|66774221|sp|Q9CZR2.2|NALD2_MOUSE
11262	384	T	G	Locus_28881.0|BlastHit|gi|66774221|sp|Q9CZR2.2|NALD2_MOUSE
11266	1063	T	C	Locus_28885.0|BlastHit|gi|75029576|sp|Q9Y140.1|DHRS7_DROME
11266	1097	A	C	Locus_28885.0|BlastHit|gi|75029576|sp|Q9Y140.1|DHRS7_DROME
11266	1983	T	C	Locus_28885.0|BlastHit|gi|75029576|sp|Q9Y140.1|DHRS7_DROME
11266	251	T	A	Locus_28885.0|BlastHit|gi|75029576|sp|Q9Y140.1|DHRS7_DROME
11266	286	C	A	Locus_28885.0|BlastHit|gi|75029576|sp|Q9Y140.1|DHRS7_DROME
11266	422	C	T	Locus_28885.0|BlastHit|gi|75029576|sp|Q9Y140.1|DHRS7_DROME
11266	423	T	C	Locus_28885.0|BlastHit|gi|75029576|sp|Q9Y140.1|DHRS7_DROME
11266	692	C	A	Locus_28885.0|BlastHit|gi|75029576|sp|Q9Y140.1|DHRS7_DROME
11266	713	C	T	Locus_28885.0|BlastHit|gi|75029576|sp|Q9Y140.1|DHRS7_DROME
11266	851	C	T	Locus_28885.0|BlastHit|gi|75029576|sp|Q9Y140.1|DHRS7_DROME
11284	1387	T	C	Locus_28893.0|BlastHit|gi|73921240|sp|Q5RB52.1|NOL11_PONAB
11285	2000	A	T	Locus_28894.0|BlastHit|gi|81917524|sp|Q9JK24.2|P2R3C_MOUSE
11285	2341	A	T	Locus_28894.0|BlastHit|gi|81917524|sp|Q9JK24.2|P2R3C_MOUSE
11311	433	T	C	Locus_28905.0|BlastHit|gi|57012693|sp|Q8BMS4.1|COQ3_MOUSE
11311	649	T	C	Locus_28905.0|BlastHit|gi|57012693|sp|Q8BMS4.1|COQ3_MOUSE
11311	802	A	T	Locus_28905.0|BlastHit|gi|57012693|sp|Q8BMS4.1|COQ3_MOUSE
11311	985	C	T	Locus_28905.0|BlastHit|gi|57012693|sp|Q8BMS4.1|COQ3_MOUSE
11312	330	T	C	Locus_28908.0|BlastHit|gi|121993358|sp|Q29GB8.1|NAAT1_DROPS
11313	1030	T	G	Locus_28909.0|BlastHit|gi|27923758|sp|Q9V498.2|CSTN1_DROME
11313	1934	T	G	Locus_28909.0|BlastHit|gi|27923758|sp|Q9V498.2|CSTN1_DROME
11321	1711	T	A	Locus_28918.0|BlastHit|gi|74731379|sp|Q96CT7.1|CC124_HUMAN
11321	2481	T	C	Locus_28918.0|BlastHit|gi|74731379|sp|Q96CT7.1|CC124_HUMAN
11321	867	C	G	Locus_28918.0|BlastHit|gi|74731379|sp|Q96CT7.1|CC124_HUMAN
11323	381	C	G	Locus_28919.0|BlastHit|gi|9910617|sp|Q9W6S5.1|ALLC_XENLA
11339	1649	T	C	Locus_28928.0|BlastHit|gi|82180006|sp|Q5U4K5.1|TM41B_XENLA
11339	821	T	C	Locus_28928.0|BlastHit|gi|82180006|sp|Q5U4K5.1|TM41B_XENLA
11340	387	G	T	Locus_28930.0|BlastHit|gi|81884339|sp|Q68FP5.1|SPN1_RAT
11346	1607	A	C	Locus_28938.0|BlastHit|gi|59798478|sp|Q9W1V6.1|PRPD3_DROME
11346	2011	A	G	Locus_28938.0|BlastHit|gi|59798478|sp|Q9W1V6.1|PRPD3_DROME
11346	278	G	A	Locus_28938.0|BlastHit|gi|59798478|sp|Q9W1V6.1|PRPD3_DROME
11350	1005	C	T	Locus_28943.0|BlastHit|gi|76363478|sp|Q8VEH8.1|ERLEC_MOUSE
11353	3694	T	C	Locus_28947.0|BlastHit|gi|229891202|sp|Q1LXK4.2|M10B1_DANRE
11353	3802	T	G	Locus_28947.0|BlastHit|gi|229891202|sp|Q1LXK4.2|M10B1_DANRE
11353	3803	G	A	Locus_28947.0|BlastHit|gi|229891202|sp|Q1LXK4.2|M10B1_DANRE
11353	5210	G	A	Locus_28947.0|BlastHit|gi|229891202|sp|Q1LXK4.2|M10B1_DANRE
11356	259	G	A	Locus_28948.0|BlastHit|gi|158517792|sp|P0C5E4.1|PTPRQ_MOUSE
11356	533	G	C,A	Locus_28948.0|BlastHit|gi|158517792|sp|P0C5E4.1|PTPRQ_MOUSE
11362	2320	A	G	Locus_28953.0|BlastHit|gi|81906126|sp|Q9DC37.1|MFSD1_MOUSE
11362	2539	T	A	Locus_28953.0|BlastHit|gi|81906126|sp|Q9DC37.1|MFSD1_MOUSE
11362	2554	A	G	Locus_28953.0|BlastHit|gi|81906126|sp|Q9DC37.1|MFSD1_MOUSE
11362	290	C	T	Locus_28953.0|BlastHit|gi|81906126|sp|Q9DC37.1|MFSD1_MOUSE
11362	3350	A	G	Locus_28953.0|BlastHit|gi|81906126|sp|Q9DC37.1|MFSD1_MOUSE
11362	3374	G	A	Locus_28953.0|BlastHit|gi|81906126|sp|Q9DC37.1|MFSD1_MOUSE
11363	1144	G	A	Locus_28956.0|BlastHit|gi|218511774|sp|O95487.2|SC24B_HUMAN
11363	1837	C	T	Locus_28956.0|BlastHit|gi|218511774|sp|O95487.2|SC24B_HUMAN
11363	2073	A	G	Locus_28956.0|BlastHit|gi|218511774|sp|O95487.2|SC24B_HUMAN
11363	2284	A	G	Locus_28956.0|BlastHit|gi|218511774|sp|O95487.2|SC24B_HUMAN
11363	471	T	C	Locus_28956.0|BlastHit|gi|218511774|sp|O95487.2|SC24B_HUMAN
11369	174	C	G	Locus_28962.0|BlastHit|gi|75076495|sp|Q4R6U7.1|RM30_MACFA
11369	175	A	G	Locus_28962.0|BlastHit|gi|75076495|sp|Q4R6U7.1|RM30_MACFA
11369	605	A	G	Locus_28962.0|BlastHit|gi|75076495|sp|Q4R6U7.1|RM30_MACFA
1136	892	G	A	Locus_8133.0|BlastHit|gi|20139848|sp|Q9U3U0.1|RLA0_CERCA
11373	1099	T	G	Locus_28965.0|BlastHit|gi|75054845|sp|Q5R774.1|KEAP1_PONAB
11373	1933	C	T	Locus_28965.0|BlastHit|gi|75054845|sp|Q5R774.1|KEAP1_PONAB
11373	2539	T	C	Locus_28965.0|BlastHit|gi|75054845|sp|Q5R774.1|KEAP1_PONAB
11374	1805	C	A	Locus_28966.0|BlastHit|gi|108860901|sp|Q29RZ2.1|PPWD1_BOVIN
11374	473	A	G	Locus_28966.0|BlastHit|gi|108860901|sp|Q29RZ2.1|PPWD1_BOVIN
11375	250	G	A	Locus_28967.0|BlastHit|gi|51315873|sp|Q6WV16.2|GALT6_DROME
11380	1061	G	A	Locus_28972.0|BlastHit|gi|19856508|sp|P17210.2|KINH_DROME
11380	1406	G	A	Locus_28972.0|BlastHit|gi|19856508|sp|P17210.2|KINH_DROME
11380	1547	G	A	Locus_28972.0|BlastHit|gi|19856508|sp|P17210.2|KINH_DROME
11380	1577	G	A	Locus_28972.0|BlastHit|gi|19856508|sp|P17210.2|KINH_DROME
11380	1751	G	A	Locus_28972.0|BlastHit|gi|19856508|sp|P17210.2|KINH_DROME
11380	1919	C	T	Locus_28972.0|BlastHit|gi|19856508|sp|P17210.2|KINH_DROME
11380	259	C	T	Locus_28972.0|BlastHit|gi|19856508|sp|P17210.2|KINH_DROME
11380	30	G	C	Locus_28972.0|BlastHit|gi|19856508|sp|P17210.2|KINH_DROME
11381	1707	C	T	Locus_28978.0|BlastHit|gi|52000767|sp|O76463.1|NFT1_CAEEL
11381	1714	C	G	Locus_28978.0|BlastHit|gi|52000767|sp|O76463.1|NFT1_CAEEL
11381	423	A	T	Locus_28978.0|BlastHit|gi|52000767|sp|O76463.1|NFT1_CAEEL
11381	429	T	A	Locus_28978.0|BlastHit|gi|52000767|sp|O76463.1|NFT1_CAEEL
11382	335	C	T	Locus_28980.0|BlastHit|gi|21542021|sp|Q9VAI1.1|CIA30_DROME
11383	1314	C	G	Locus_28980.0|BlastHit|gi|21542021|sp|Q9VAI1.1|CIA30_DROME
11383	272	G	A	Locus_28980.0|BlastHit|gi|21542021|sp|Q9VAI1.1|CIA30_DROME
11383	653	G	T	Locus_28980.0|BlastHit|gi|21542021|sp|Q9VAI1.1|CIA30_DROME
11383	870	T	C	Locus_28980.0|BlastHit|gi|21542021|sp|Q9VAI1.1|CIA30_DROME
11383	88	A	C	Locus_28980.0|BlastHit|gi|21542021|sp|Q9VAI1.1|CIA30_DROME
11384	2529	T	C	Locus_28982.1|BlastHit|gi|74584400|sp|Q59P03.1|NCB5R_CANAL
11387	1000	T	G	Locus_28986.0|BlastHit|gi|187470638|sp|A4IGF3.1|ATP23_DANRE
11389	1033	A	T	Locus_28991.0|BlastHit|gi|12643524|sp|Q9Y105.1|SYQ_DROME
11389	1517	A	G	Locus_28991.0|BlastHit|gi|12643524|sp|Q9Y105.1|SYQ_DROME
11389	2597	A	G	Locus_28991.0|BlastHit|gi|12643524|sp|Q9Y105.1|SYQ_DROME
11389	2720	T	C	Locus_28991.0|BlastHit|gi|12643524|sp|Q9Y105.1|SYQ_DROME
11389	2836	T	C	Locus_28991.0|BlastHit|gi|12643524|sp|Q9Y105.1|SYQ_DROME
11389	3002	C	T	Locus_28991.0|BlastHit|gi|12643524|sp|Q9Y105.1|SYQ_DROME
11389	723	A	C	Locus_28991.0|BlastHit|gi|12643524|sp|Q9Y105.1|SYQ_DROME
11389	896	C	A	Locus_28991.0|BlastHit|gi|12643524|sp|Q9Y105.1|SYQ_DROME
11398	2947	G	A	Locus_29000.0|BlastHit|gi|224493288|sp|A7MB10.1|RRP5_BOVIN
11398	2953	C	G	Locus_29000.0|BlastHit|gi|224493288|sp|A7MB10.1|RRP5_BOVIN
11398	3120	C	G	Locus_29000.0|BlastHit|gi|224493288|sp|A7MB10.1|RRP5_BOVIN
11398	3370	T	G	Locus_29000.0|BlastHit|gi|224493288|sp|A7MB10.1|RRP5_BOVIN
11398	3476	T	C	Locus_29000.0|BlastHit|gi|224493288|sp|A7MB10.1|RRP5_BOVIN
11413	1068	T	C	Locus_29016.0|BlastHit|gi|123795940|sp|Q0VBB0.1|PRLD2_MOUSE
11413	1223	A	G	Locus_29016.0|BlastHit|gi|123795940|sp|Q0VBB0.1|PRLD2_MOUSE
11413	698	G	A	Locus_29016.0|BlastHit|gi|123795940|sp|Q0VBB0.1|PRLD2_MOUSE
11413	722	G	A	Locus_29016.0|BlastHit|gi|123795940|sp|Q0VBB0.1|PRLD2_MOUSE
11414	1125	A	G	Locus_29019.1|BlastHit|gi|158564324|sp|Q69ZQ1.2|K1161_MOUSE
11414	1527	G	A,C	Locus_29019.1|BlastHit|gi|158564324|sp|Q69ZQ1.2|K1161_MOUSE
11414	1602	C	A	Locus_29019.1|BlastHit|gi|158564324|sp|Q69ZQ1.2|K1161_MOUSE
11414	1605	A	C,T	Locus_29019.1|BlastHit|gi|158564324|sp|Q69ZQ1.2|K1161_MOUSE
11414	863	T	G	Locus_29019.1|BlastHit|gi|158564324|sp|Q69ZQ1.2|K1161_MOUSE
11424	1847	T	A	Locus_29024.0|BlastHit|gi|193806337|sp|Q14318.2|FKBP8_HUMAN
11424	2125	T	G	Locus_29024.0|BlastHit|gi|193806337|sp|Q14318.2|FKBP8_HUMAN
11424	2450	T	C	Locus_29024.0|BlastHit|gi|193806337|sp|Q14318.2|FKBP8_HUMAN
11424	929	G	A	Locus_29024.0|BlastHit|gi|193806337|sp|Q14318.2|FKBP8_HUMAN
11425	1627	T	C	Locus_29024.0|BlastHit|gi|82136235|sp|Q90577.1|SRCA_CHICK
11428	338	A	G	Locus_29028.0|BlastHit|gi|61211706|sp|O88199.1|CHST3_MOUSE
11428	796	G	A	Locus_29028.0|BlastHit|gi|61211706|sp|O88199.1|CHST3_MOUSE
11428	797	G	A	Locus_29028.0|BlastHit|gi|61211706|sp|O88199.1|CHST3_MOUSE
11433	1301	G	A	Locus_29032.0|BlastHit|gi|68067880|sp|Q86UW9.3|DTX2_HUMAN
11433	1310	C	T	Locus_29032.0|BlastHit|gi|68067880|sp|Q86UW9.3|DTX2_HUMAN
11434	1011	C	T	Locus_29034.0|BlastHit|gi|17380291|sp|Q92900.2|RENT1_HUMAN
11434	1137	T	C	Locus_29034.0|BlastHit|gi|17380291|sp|Q92900.2|RENT1_HUMAN
11434	1368	C	T	Locus_29034.0|BlastHit|gi|17380291|sp|Q92900.2|RENT1_HUMAN
11434	1782	G	A	Locus_29034.0|BlastHit|gi|17380291|sp|Q92900.2|RENT1_HUMAN
11434	1785	C	A	Locus_29034.0|BlastHit|gi|17380291|sp|Q92900.2|RENT1_HUMAN
11434	1851	A	G	Locus_29034.0|BlastHit|gi|17380291|sp|Q92900.2|RENT1_HUMAN
11434	2127	T	G	Locus_29034.0|BlastHit|gi|17380291|sp|Q92900.2|RENT1_HUMAN
11434	2418	C	T	Locus_29034.0|BlastHit|gi|17380291|sp|Q92900.2|RENT1_HUMAN
11434	3061	C	T	Locus_29034.0|BlastHit|gi|17380291|sp|Q92900.2|RENT1_HUMAN
11434	3941	C	T	Locus_29034.0|BlastHit|gi|17380291|sp|Q92900.2|RENT1_HUMAN
11434	786	T	C	Locus_29034.0|BlastHit|gi|17380291|sp|Q92900.2|RENT1_HUMAN
11434	885	G	A	Locus_29034.0|BlastHit|gi|17380291|sp|Q92900.2|RENT1_HUMAN
11435	1773	T	C	Locus_29036.0|BlastHit|gi|123910245|sp|Q28G87.1|LARP7_XENTR
11436	1139	A	T	Locus_29036.0|BlastHit|gi|12230398|sp|Q9JJK4.1|PEX3_RAT
11436	1331	G	A	Locus_29036.0|BlastHit|gi|12230398|sp|Q9JJK4.1|PEX3_RAT
11436	1658	T	C	Locus_29036.0|BlastHit|gi|12230398|sp|Q9JJK4.1|PEX3_RAT
11436	1925	G	C	Locus_29036.0|BlastHit|gi|12230398|sp|Q9JJK4.1|PEX3_RAT
11436	2047	A	G	Locus_29036.0|BlastHit|gi|12230398|sp|Q9JJK4.1|PEX3_RAT
11436	707	G	A	Locus_29036.0|BlastHit|gi|12230398|sp|Q9JJK4.1|PEX3_RAT
11436	848	T	C	Locus_29036.0|BlastHit|gi|12230398|sp|Q9JJK4.1|PEX3_RAT
11437	712	G	A	Locus_29037.0|BlastHit|gi|75054780|sp|Q5R5X9.1|SMYD4_PONAB
11437	961	C	A	Locus_29037.0|BlastHit|gi|75054780|sp|Q5R5X9.1|SMYD4_PONAB
11438	1268	C	A	Locus_29038.0|BlastHit|gi|71152391|sp|Q7TNE1.1|CG010_MOUSE
11438	184	G	C	Locus_29038.0|BlastHit|gi|71152391|sp|Q7TNE1.1|CG010_MOUSE
11439	3265	T	C	Locus_29040.0|BlastHit|gi|122142173|sp|Q0P5B1.1|PEX13_BOVIN
11439	3283	G	T	Locus_29040.0|BlastHit|gi|122142173|sp|Q0P5B1.1|PEX13_BOVIN
11439	3329	G	C	Locus_29040.0|BlastHit|gi|122142173|sp|Q0P5B1.1|PEX13_BOVIN
1143	269	C	T	Locus_8166.0|BlastHit|gi|75060399|sp|Q56K03.3|RL27A_BOVIN
1143	329	G	A	Locus_8166.0|BlastHit|gi|75060399|sp|Q56K03.3|RL27A_BOVIN
11440	976	T	A	Locus_29041.0|BlastHit|gi|229463034|sp|Q9VFS5.4|PP4R3_DROME
11461	860	T	C	Locus_29042.0|BlastHit|gi|342187150|sp|Q920Q4.3|VPS16_MOUSE
11462	1332	A	G	Locus_29044.0|BlastHit|gi|60416378|sp|Q9Y6N1.3|COX11_HUMAN
11462	820	G	C	Locus_29044.0|BlastHit|gi|60416378|sp|Q9Y6N1.3|COX11_HUMAN
11465	286	G	A	Locus_29048.0|BlastHit|gi|3183011|sp|O08770.1|GPV_RAT
11468	162	A	C	Locus_29049.0|BlastHit|gi|122102783|sp|Q7JUR6.1|GDAP2_DROME
11476	1676	G	A	Locus_29050.0|BlastHit|gi|74762612|sp|Q8TCA0.1|LRC20_HUMAN
11476	1701	A	G	Locus_29050.0|BlastHit|gi|74762612|sp|Q8TCA0.1|LRC20_HUMAN
11476	2165	T	A	Locus_29050.0|BlastHit|gi|74762612|sp|Q8TCA0.1|LRC20_HUMAN
11480	3980	T	G	Locus_29057.0|BlastHit|gi|67461073|sp|Q9CWP6.2|MSPD2_MOUSE
11486	42	C	T	Locus_29061.0|BlastHit|gi|121671|sp|P21765.2|GPX5_MOUSE
11487	329	T	C	Locus_29061.0|BlastHit|gi|6016164|sp|O75715.1|GPX5_HUMAN
11487	330	A	C	Locus_29061.0|BlastHit|gi|6016164|sp|O75715.1|GPX5_HUMAN
11487	338	T	C	Locus_29061.0|BlastHit|gi|6016164|sp|O75715.1|GPX5_HUMAN
11490	470	T	C	Locus_29065.0|BlastHit|gi|6016234|sp|P79926.1|HNF4B_XENLA
11491	595	T	A	Locus_29066.0|BlastHit|gi|60390624|sp|Q66S03.1|NATTE_THANI
11509	285	T	C	Locus_29071.0|BlastHit|gi|67460619|sp|Q5M823.1|NUDC2_RAT
11510	1279	T	C	Locus_29072.0|BlastHit|gi|82081935|sp|Q5ZK33.1|LETM1_CHICK
11510	1280	T	A	Locus_29072.0|BlastHit|gi|82081935|sp|Q5ZK33.1|LETM1_CHICK
11510	1609	T	C	Locus_29072.0|BlastHit|gi|82081935|sp|Q5ZK33.1|LETM1_CHICK
11510	1708	G	A	Locus_29072.0|BlastHit|gi|82081935|sp|Q5ZK33.1|LETM1_CHICK
11510	1741	T	C	Locus_29072.0|BlastHit|gi|82081935|sp|Q5ZK33.1|LETM1_CHICK
11510	1759	C	A	Locus_29072.0|BlastHit|gi|82081935|sp|Q5ZK33.1|LETM1_CHICK
11510	1822	G	A	Locus_29072.0|BlastHit|gi|82081935|sp|Q5ZK33.1|LETM1_CHICK
11510	1843	C	T	Locus_29072.0|BlastHit|gi|82081935|sp|Q5ZK33.1|LETM1_CHICK
11510	1876	G	A	Locus_29072.0|BlastHit|gi|82081935|sp|Q5ZK33.1|LETM1_CHICK
11510	1879	C	T	Locus_29072.0|BlastHit|gi|82081935|sp|Q5ZK33.1|LETM1_CHICK
11510	1903	T	C	Locus_29072.0|BlastHit|gi|82081935|sp|Q5ZK33.1|LETM1_CHICK
11510	1960	C	T	Locus_29072.0|BlastHit|gi|82081935|sp|Q5ZK33.1|LETM1_CHICK
11510	1984	C	A,T	Locus_29072.0|BlastHit|gi|82081935|sp|Q5ZK33.1|LETM1_CHICK
11510	2131	A	T	Locus_29072.0|BlastHit|gi|82081935|sp|Q5ZK33.1|LETM1_CHICK
11510	2143	G	A	Locus_29072.0|BlastHit|gi|82081935|sp|Q5ZK33.1|LETM1_CHICK
11510	2602	C	G	Locus_29072.0|BlastHit|gi|82081935|sp|Q5ZK33.1|LETM1_CHICK
11510	2902	T	A	Locus_29072.0|BlastHit|gi|82081935|sp|Q5ZK33.1|LETM1_CHICK
11510	3385	A	G	Locus_29072.0|BlastHit|gi|82081935|sp|Q5ZK33.1|LETM1_CHICK
11511	155	T	A	Locus_29074.0|BlastHit|gi|1351982|sp|Q04519.2|ASM_MOUSE
11511	38	A	C	Locus_29074.0|BlastHit|gi|1351982|sp|Q04519.2|ASM_MOUSE
11511	721	A	G	Locus_29074.0|BlastHit|gi|1351982|sp|Q04519.2|ASM_MOUSE
11513	1020	G	A,C	Locus_29075.0|BlastHit|gi|21541962|sp|Q9QZU7.1|BODG_RAT
11513	429	T	C	Locus_29075.0|BlastHit|gi|21541962|sp|Q9QZU7.1|BODG_RAT
11513	627	G	A	Locus_29075.0|BlastHit|gi|21541962|sp|Q9QZU7.1|BODG_RAT
11513	86	T	G	Locus_29075.0|BlastHit|gi|21541962|sp|Q9QZU7.1|BODG_RAT
11521	1330	A	G	Locus_29085.1|BlastHit|gi|82173834|sp|Q5TZ07.1|PPAC2_DANRE
11521	1556	A	G,C	Locus_29085.1|BlastHit|gi|82173834|sp|Q5TZ07.1|PPAC2_DANRE
11521	1599	T	G	Locus_29085.1|BlastHit|gi|82173834|sp|Q5TZ07.1|PPAC2_DANRE
11521	1795	G	T	Locus_29085.1|BlastHit|gi|82173834|sp|Q5TZ07.1|PPAC2_DANRE
11530	1266	T	A	Locus_29088.2|BlastHit|gi|60390624|sp|Q66S03.1|NATTE_THANI
11533	1463	A	T	Locus_29089.0|BlastHit|gi|82237294|sp|Q6NX31.1|MCM7_XENTR
11533	230	C	T	Locus_29089.0|BlastHit|gi|82237294|sp|Q6NX31.1|MCM7_XENTR
11533	503	G	C	Locus_29089.0|BlastHit|gi|82237294|sp|Q6NX31.1|MCM7_XENTR
11533	524	A	G	Locus_29089.0|BlastHit|gi|82237294|sp|Q6NX31.1|MCM7_XENTR
11533	647	A	C	Locus_29089.0|BlastHit|gi|82237294|sp|Q6NX31.1|MCM7_XENTR
11533	884	G	A	Locus_29089.0|BlastHit|gi|82237294|sp|Q6NX31.1|MCM7_XENTR
11534	1324	A	G	Locus_29090.0|BlastHit|gi|125987581|sp|Q3SZ27.1|APOOL_BOVIN
11534	176	G	A	Locus_29090.0|BlastHit|gi|125987581|sp|Q3SZ27.1|APOOL_BOVIN
11535	1486	C	T	Locus_29092.0|BlastHit|gi|74738645|sp|Q7RTX9.1|MOT14_HUMAN
11535	250	G	A	Locus_29092.0|BlastHit|gi|74738645|sp|Q7RTX9.1|MOT14_HUMAN
11535	253	A	G	Locus_29092.0|BlastHit|gi|74738645|sp|Q7RTX9.1|MOT14_HUMAN
11535	721	G	C	Locus_29092.0|BlastHit|gi|74738645|sp|Q7RTX9.1|MOT14_HUMAN
11535	814	T	C	Locus_29092.0|BlastHit|gi|74738645|sp|Q7RTX9.1|MOT14_HUMAN
11535	93	C	G	Locus_29092.0|BlastHit|gi|74738645|sp|Q7RTX9.1|MOT14_HUMAN
11536	1422	A	T	Locus_29093.0|BlastHit|gi|38372289|sp|Q24134.2|NELFD_DROME
11550	1460	T	C	Locus_29105.0|BlastHit|gi|108861919|sp|Q2TBG8.1|UCHL3_BOVIN
11550	2280	A	G	Locus_29105.0|BlastHit|gi|108861919|sp|Q2TBG8.1|UCHL3_BOVIN
11550	623	C	T	Locus_29105.0|BlastHit|gi|108861919|sp|Q2TBG8.1|UCHL3_BOVIN
11550	638	T	G	Locus_29105.0|BlastHit|gi|108861919|sp|Q2TBG8.1|UCHL3_BOVIN
11550	914	G	T	Locus_29105.0|BlastHit|gi|108861919|sp|Q2TBG8.1|UCHL3_BOVIN
11552	527	C	T	Locus_29109.0|BlastHit|gi|1352330|sp|P47823.1|EI2BE_RABIT
11552	620	C	T	Locus_29109.0|BlastHit|gi|1352330|sp|P47823.1|EI2BE_RABIT
11552	629	T	G	Locus_29109.0|BlastHit|gi|1352330|sp|P47823.1|EI2BE_RABIT
11552	86	A	G	Locus_29109.0|BlastHit|gi|1352330|sp|P47823.1|EI2BE_RABIT
11553	1295	A	T	Locus_29109.0|BlastHit|gi|82187285|sp|Q6PGY5.1|DJC21_DANRE
11553	1457	G	A	Locus_29109.0|BlastHit|gi|82187285|sp|Q6PGY5.1|DJC21_DANRE
11553	1601	C	T	Locus_29109.0|BlastHit|gi|82187285|sp|Q6PGY5.1|DJC21_DANRE
11555	690	G	A	Locus_29110.0|BlastHit|gi|135981|sp|P08953.1|TOLL_DROME
11556	265	G	A	Locus_29112.0|BlastHit|gi|384872699|sp|P83088.4|FUCTC_DROME
11557	1073	T	G	Locus_29112.0|BlastHit|gi|384872699|sp|P83088.4|FUCTC_DROME
11557	1161	C	T	Locus_29112.0|BlastHit|gi|384872699|sp|P83088.4|FUCTC_DROME
11561	1030	T	C	Locus_29117.1|BlastHit|gi|1346658|sp|P48763.1|SL9A2_RAT
11561	2281	C	T	Locus_29117.1|BlastHit|gi|1346658|sp|P48763.1|SL9A2_RAT
11561	3031	T	C	Locus_29117.1|BlastHit|gi|1346658|sp|P48763.1|SL9A2_RAT
11561	3940	T	G	Locus_29117.1|BlastHit|gi|1346658|sp|P48763.1|SL9A2_RAT
11568	1242	A	G	Locus_29122.0|BlastHit|gi|51338793|sp|P70699.2|LYAG_MOUSE
11568	1299	T	C	Locus_29122.0|BlastHit|gi|51338793|sp|P70699.2|LYAG_MOUSE
11568	2385	C	T	Locus_29122.0|BlastHit|gi|51338793|sp|P70699.2|LYAG_MOUSE
11569	4343	G	T	Locus_29125.0|BlastHit|gi|156630939|sp|A1L0Y2.1|NEUL4_XENTR
11571	2265	T	G	Locus_29128.0|BlastHit|gi|66774173|sp|Q62703.2|RCN2_RAT
11571	254	G	C	Locus_29128.0|BlastHit|gi|66774173|sp|Q62703.2|RCN2_RAT
11571	605	T	C	Locus_29128.0|BlastHit|gi|66774173|sp|Q62703.2|RCN2_RAT
11571	725	C	T	Locus_29128.0|BlastHit|gi|66774173|sp|Q62703.2|RCN2_RAT
11572	1124	A	G	Locus_29131.0|BlastHit|gi|152031592|sp|P27867.4|DHSO_RAT
11572	26	C	G,A	Locus_29131.0|BlastHit|gi|152031592|sp|P27867.4|DHSO_RAT
11581	3505	G	A	Locus_29138.0|BlastHit|gi|75042795|sp|Q5TJF0.1|VPS52_CANFA
11587	1242	C	G	Locus_29144.0|BlastHit|gi|123779975|sp|Q32KI9.1|ARSI_MOUSE
11587	367	C	A	Locus_29144.0|BlastHit|gi|123779975|sp|Q32KI9.1|ARSI_MOUSE
11587	640	C	A	Locus_29144.0|BlastHit|gi|123779975|sp|Q32KI9.1|ARSI_MOUSE
11587	782	A	G	Locus_29144.0|BlastHit|gi|123779975|sp|Q32KI9.1|ARSI_MOUSE
11589	1856	T	G	Locus_29149.0|BlastHit|gi|74996732|sp|Q54KA7.1|SECG_DICDI
11589	1882	A	T	Locus_29149.0|BlastHit|gi|74996732|sp|Q54KA7.1|SECG_DICDI
11589	376	C	T	Locus_29149.0|BlastHit|gi|74996732|sp|Q54KA7.1|SECG_DICDI
11590	176	A	T	Locus_29153.0|BlastHit|gi|20455034|sp|Q20140.1|KAD1_CAEEL
11590	307	A	G	Locus_29153.0|BlastHit|gi|20455034|sp|Q20140.1|KAD1_CAEEL
11590	316	G	A	Locus_29153.0|BlastHit|gi|20455034|sp|Q20140.1|KAD1_CAEEL
11590	332	A	G	Locus_29153.0|BlastHit|gi|20455034|sp|Q20140.1|KAD1_CAEEL
11590	872	A	G	Locus_29153.0|BlastHit|gi|20455034|sp|Q20140.1|KAD1_CAEEL
11594	1880	A	G	Locus_29158.0|BlastHit|gi|74872784|sp|Q9W517.1|WAPL_DROME
11597	1145	A	G,T	Locus_29163.0|BlastHit|gi|387942486|sp|D3ZAT9.1|FAXC_RAT
11597	450	G	C	Locus_29163.0|BlastHit|gi|387942486|sp|D3ZAT9.1|FAXC_RAT
11602	2013	A	T	Locus_29164.1|BlastHit|gi|259710468|sp|P0CB33.1|ZN735_HUMAN
11604	1063	C	G	Locus_29164.1|BlastHit|gi|11136107|sp|Q61116.1|ZN235_MOUSE
11604	3013	A	T	Locus_29164.1|BlastHit|gi|11136107|sp|Q61116.1|ZN235_MOUSE
11604	3570	T	C	Locus_29164.1|BlastHit|gi|11136107|sp|Q61116.1|ZN235_MOUSE
11605	2727	A	G	Locus_29165.0|BlastHit|gi|74852969|sp|Q54K57.1|TPSA_DICDI
11605	2730	A	T	Locus_29165.0|BlastHit|gi|74852969|sp|Q54K57.1|TPSA_DICDI
11611	472	G	A	Locus_29172.0|BlastHit|gi|117949833|sp|P50143.2|TCPG_XENLA
11613	555	T	A	Locus_29174.0|BlastHit|gi|81917204|sp|Q9DC33.1|HM20A_MOUSE
11613	630	G	A	Locus_29174.0|BlastHit|gi|81917204|sp|Q9DC33.1|HM20A_MOUSE
11613	675	C	A,T	Locus_29174.0|BlastHit|gi|81917204|sp|Q9DC33.1|HM20A_MOUSE
11618	1113	G	A	Locus_29177.0|BlastHit|gi|25009458|sp|Q8VCT9.1|TESK2_MOUSE
11618	1556	C	G	Locus_29177.0|BlastHit|gi|25009458|sp|Q8VCT9.1|TESK2_MOUSE
11618	1821	G	T,A	Locus_29177.0|BlastHit|gi|25009458|sp|Q8VCT9.1|TESK2_MOUSE
11618	1893	A	T	Locus_29177.0|BlastHit|gi|25009458|sp|Q8VCT9.1|TESK2_MOUSE
11618	2016	G	A	Locus_29177.0|BlastHit|gi|25009458|sp|Q8VCT9.1|TESK2_MOUSE
11618	2091	G	C	Locus_29177.0|BlastHit|gi|25009458|sp|Q8VCT9.1|TESK2_MOUSE
11618	900	G	C	Locus_29177.0|BlastHit|gi|25009458|sp|Q8VCT9.1|TESK2_MOUSE
11621	921	G	T	Locus_29179.0|BlastHit|gi|71153786|sp|Q5ZKD5.1|RRP12_CHICK
11625	2555	C	A	Locus_29182.1|BlastHit|gi|82239979|sp|Q76LC6.1|RBM24_DANRE
11625	2828	T	C	Locus_29182.1|BlastHit|gi|82239979|sp|Q76LC6.1|RBM24_DANRE
11625	3659	T	C	Locus_29182.1|BlastHit|gi|82239979|sp|Q76LC6.1|RBM24_DANRE
11625	4685	A	C	Locus_29182.1|BlastHit|gi|82239979|sp|Q76LC6.1|RBM24_DANRE
11625	675	C	T	Locus_29182.1|BlastHit|gi|82239979|sp|Q76LC6.1|RBM24_DANRE
[truncated: 7,954 more rows]

## Sheet: ALL UNHEALTHY SNP
#Unigene	POS	REF	ALT	Loco_id
[truncated: 7,008 more rows]

## Sheet: #SNP_LOCO_High
Grand Total	3125
[truncated: 1,422 more rows]

## Sheet: #SNP_ LOCO_LOW
Grand Total	3912
[truncated: 1,690 more rows]

## Sheet: #SNP_LOCO_HEALTHY
Grand Total	9338
[truncated: 2,945 more rows]

[truncated: 1 more sheets: #SNP_LOCO_UNHEALTHY]
