# Supplementary material for: Identification of SNPs potentially related to immune responses and growth performance in Litopenaeus vannamei by RNA-seq analyses
Source: PeerJ. 2018 Jul 4;6:e5154. doi: 10.7717/peerj.5154 (PMC6035726; doi:10.7717/peerj.5154)
Supplement: Table S2 — BlastX hits for unigenes containing SNPs in GO for higher growth group. Biological Process, Molecular Function and Cellular Component annotation is shown at level 2. [file peerj-06-5154-s002.xlsx]

## Sheet: All_High_GO_contigs
Locus_id	#Unigene	GO_annotation
Locus_10212.0|BlastHit|gi|1709616|sp|P54399.1|PDI_DROME	1435	GO:0060187:cellular_component:cell pole	GO:0005737:cellular_component:cytoplasm	GO:0012505:cellular_component:endomembrane system	GO:0005783:cellular_component:endoplasmic reticulum	GO:0005788:cellular_component:endoplasmic reticulum lumen	GO:0005615:cellular_component:extracellular space	GO:0045169:cellular_component:fusome	GO:0005811:cellular_component:lipid particle	GO:0043025:cellular_component:neuronal cell body	GO:0005635:cellular_component:nuclear envelope	GO:0048471:cellular_component:perinuclear region of cytoplasm	GO:0005791:cellular_component:rough endoplasmic reticulum	GO:0070732:cellular_component:spindle envelope	GO:0003756:molecular_function:protein disulfide isomerase activity	GO:0045454:biological_process:cell redox homeostasis	GO:0019511:biological_process:peptidyl-proline hydroxylation	GO:0006457:biological_process:protein folding	GO:1902175:biological_process:regulation of oxidative stress-induced intrinsic apoptotic signaling pathway	GO:0034976:biological_process:response to endoplasmic reticulum stress
Locus_10547.0|BlastHit|gi|81904578|sp|Q9CZX9.1|TMM85_MOUSE	1492	GO:0072546:cellular_component:ER membrane protein complex	GO:0016021:cellular_component:integral component of membrane	GO:0006915:biological_process:apoptotic process
Locus_11343.0|BlastHit|gi|317373564|sp|Q8NHP7.4|EXD1_HUMAN	1635	GO:0008408:molecular_function:3'-5' exonuclease activity	GO:0003676:molecular_function:nucleic acid binding
Locus_11356.0|BlastHit|gi|82178079|sp|Q566Y8.1|MGN_DANRE	1640	GO:0005737:cellular_component:cytoplasm	GO:0016607:cellular_component:nuclear speck	GO:0003723:molecular_function:RNA binding	GO:0006397:biological_process:mRNA processing	GO:0051028:biological_process:mRNA transport	GO:0000184:biological_process:nuclear-transcribed mRNA catabolic process, nonsense-mediated decay	GO:0000381:biological_process:regulation of alternative mRNA splicing, via spliceosome	GO:0006417:biological_process:regulation of translation	GO:0008380:biological_process:RNA splicing
Locus_11471.0|BlastHit|gi|75060961|sp|Q5EA68.3|S61A1_BOVIN	1679	GO:0030176:cellular_component:integral component of endoplasmic reticulum membrane	GO:0043022:molecular_function:ribosome binding	GO:0016049:biological_process:cell growth	GO:0007029:biological_process:endoplasmic reticulum organization	GO:0006620:biological_process:posttranslational protein targeting to membrane	GO:0045047:biological_process:protein targeting to ER	GO:0006614:biological_process:SRP-dependent cotranslational protein targeting to membrane
Locus_11562.0|BlastHit|gi|1709447|sp|P52899.1|ODPA_CAEEL	1716	GO:0005759:cellular_component:mitochondrial matrix	GO:0005739:cellular_component:mitochondrion	GO:0004739:molecular_function:pyruvate dehydrogenase (acetyl-transferring) activity	GO:0006096:biological_process:glycolytic process
Locus_11596.0|BlastHit|gi|51701872|sp|Q7M767.3|UB2V2_RAT	1729	GO:0070062:cellular_component:extracellular vesicular exosome	GO:0005634:cellular_component:nucleus	GO:0031372:cellular_component:UBC13-MMS2 complex	GO:0016881:molecular_function:acid-amino acid ligase activity	GO:0000729:biological_process:DNA double-strand break processing	GO:0042275:biological_process:error-free postreplication DNA repair	GO:0043524:biological_process:negative regulation of neuron apoptotic process	GO:0045739:biological_process:positive regulation of DNA repair	GO:0010976:biological_process:positive regulation of neuron projection development	GO:0032436:biological_process:positive regulation of proteasomal ubiquitin-dependent protein catabolic process	GO:0051965:biological_process:positive regulation of synapse assembly
Locus_11653.0|BlastHit|gi|47117653|sp|P61165.1|CK010_HUMAN	1749	GO:0016021:cellular_component:integral component of membrane
Locus_11762.0|BlastHit|gi|729704|sp|Q04832.1|HEXP_LEIMA	1786	GO:0005634:cellular_component:nucleus	GO:0003677:molecular_function:DNA binding	GO:0008270:molecular_function:zinc ion binding
Locus_11908.0|BlastHit|gi|384950755|sp|G3V9R3.1|ST1D1_RAT	1840	GO:0005737:cellular_component:cytoplasm	GO:0008146:molecular_function:sulfotransferase activity	GO:0006584:biological_process:catecholamine metabolic process	GO:0006629:biological_process:lipid metabolic process
Locus_11908.0|BlastHit|gi|384950755|sp|G3V9R3.1|ST1D1_RAT	1841	GO:0005737:cellular_component:cytoplasm	GO:0008146:molecular_function:sulfotransferase activity	GO:0006584:biological_process:catecholamine metabolic process	GO:0006629:biological_process:lipid metabolic process
Locus_11923.0|BlastHit|gi|81900250|sp|Q8CFE2.1|CD027_MOUSE	1847	GO:0005634:cellular_component:nucleus
Locus_11965.0|BlastHit|gi|74739637|sp|O75935.1|DCTN3_HUMAN	1863	GO:0005813:cellular_component:centrosome	GO:0032154:cellular_component:cleavage furrow	GO:0000777:cellular_component:condensed chromosome kinetochore	GO:0005829:cellular_component:cytosol	GO:0005869:cellular_component:dynactin complex	GO:0030496:cellular_component:midbody	GO:0048471:cellular_component:perinuclear region of cytoplasm	GO:0005819:cellular_component:spindle	GO:0005198:molecular_function:structural molecule activity	GO:0019886:biological_process:antigen processing and presentation of exogenous peptide antigen via MHC class II	GO:0000910:biological_process:cytokinesis	GO:0000086:biological_process:G2/M transition of mitotic cell cycle	GO:0007017:biological_process:microtubule-based process	GO:0000278:biological_process:mitotic cell cycle	GO:0007067:biological_process:mitotic nuclear division
Locus_11992.0|BlastHit|gi|41688549|sp|Q8WQA4.2|EXC4_CAEEL	1876	GO:0043296:cellular_component:apical junction complex	GO:0016324:cellular_component:apical plasma membrane	GO:0034707:cellular_component:chloride channel complex	GO:0005887:cellular_component:integral component of plasma membrane	GO:0005764:cellular_component:lysosome	GO:0005254:molecular_function:chloride channel activity	GO:0005244:molecular_function:voltage-gated ion channel activity	GO:0002064:biological_process:epithelial cell development	GO:0035150:biological_process:regulation of tube size
Locus_12003.0|BlastHit|gi|218511884|sp|Q00341.2|VIGLN_HUMAN	1878	GO:0005737:cellular_component:cytoplasm	GO:0034364:cellular_component:high-density lipoprotein particle	GO:0005634:cellular_component:nucleus	GO:0005886:cellular_component:plasma membrane	GO:0008289:molecular_function:lipid binding	GO:0044822:molecular_function:poly(A) RNA binding	GO:0008203:biological_process:cholesterol metabolic process	GO:0006869:biological_process:lipid transport
Locus_14631.0|BlastHit|gi|18202731|sp|Q9BQ67.1|GRWD1_HUMAN	2304	GO:0005737:cellular_component:cytoplasm	GO:0005730:cellular_component:nucleolus	GO:0005634:cellular_component:nucleus	GO:0044822:molecular_function:poly(A) RNA binding
Locus_14937.0|BlastHit|gi|74949008|sp|Q9W3T5.1|U640_DROME	2379	GO:0005576:cellular_component:extracellular region
Locus_14937.0|BlastHit|gi|74949008|sp|Q9W3T5.1|U640_DROME	2379	GO:0016021:cellular_component:integral component of membrane
Locus_14955.0|BlastHit|gi|5921936|sp|P81576.1|CUPA2_CANPG	2388	GO:0042302:molecular_function:structural constituent of cuticle
Locus_14987.0|BlastHit|gi|124106304|sp|P05166.3|PCCB_HUMAN	2405	GO:0005829:cellular_component:cytosol	GO:0005759:cellular_component:mitochondrial matrix	GO:0005739:cellular_component:mitochondrion	GO:0005524:molecular_function:ATP binding	GO:0004658:molecular_function:propionyl-CoA carboxylase activity	GO:0006768:biological_process:biotin metabolic process	GO:0044255:biological_process:cellular lipid metabolic process	GO:0006635:biological_process:fatty acid beta-oxidation	GO:0019626:biological_process:short-chain fatty acid catabolic process	GO:0044281:biological_process:small molecule metabolic process	GO:0006766:biological_process:vitamin metabolic process	GO:0006767:biological_process:water-soluble vitamin metabolic process
Locus_15033.0|BlastHit|gi|82082505|sp|Q5ZLC1.1|RM50_CHICK	2421	GO:0005739:cellular_component:mitochondrion	GO:0005840:cellular_component:ribosome
Locus_15035.0|BlastHit|gi|6016407|sp|O77049.1|JTB_BRUMA	2422	GO:0005737:cellular_component:cytoplasm	GO:0016021:cellular_component:integral component of membrane	GO:0005815:cellular_component:microtubule organizing center	GO:0030496:cellular_component:midbody	GO:0005739:cellular_component:mitochondrion	GO:0005819:cellular_component:spindle	GO:0019901:molecular_function:protein kinase binding	GO:0000910:biological_process:cytokinesis	GO:0007067:biological_process:mitotic nuclear division	GO:0045860:biological_process:positive regulation of protein kinase activity
Locus_15231.0|BlastHit|gi|108860942|sp|Q3SZ12.1|RLP24_BOVIN	2478	GO:0005730:cellular_component:nucleolus	GO:0042254:biological_process:ribosome biogenesis
Locus_15262.0|BlastHit|gi|50400799|sp|Q9VZ23.1|RAN_DROME	2496	GO:0005938:cellular_component:cell cortex	GO:0005737:cellular_component:cytoplasm	GO:0005811:cellular_component:lipid particle	GO:0005875:cellular_component:microtubule associated complex	GO:0072686:cellular_component:mitotic spindle	GO:0005880:cellular_component:nuclear microtubule	GO:0005634:cellular_component:nucleus	GO:0005525:molecular_function:GTP binding	GO:0003924:molecular_function:GTPase activity	GO:0007015:biological_process:actin filament organization	GO:0007155:biological_process:cell adhesion	GO:0007049:biological_process:cell cycle	GO:0000132:biological_process:establishment of mitotic spindle orientation	GO:0006886:biological_process:intracellular protein transport	GO:0000212:biological_process:meiotic spindle organization	GO:0007067:biological_process:mitotic nuclear division	GO:0048812:biological_process:neuron projection morphogenesis	GO:0006913:biological_process:nucleocytoplasmic transport	GO:0008360:biological_process:regulation of cell shape	GO:0032880:biological_process:regulation of protein localization	GO:0007264:biological_process:small GTPase mediated signal transduction
Locus_15268.0|BlastHit|gi|115502331|sp|Q0MQJ4.1|NDUBB_GORGO	2498	GO:0016021:cellular_component:integral component of membrane	GO:0005747:cellular_component:mitochondrial respiratory chain complex I	GO:0055114:biological_process:oxidation-reduction process
Locus_15291.0|BlastHit|gi|17366497|sp|Q24537.1|HMG2_DROME	2508	GO:0005634:cellular_component:nucleus	GO:0005700:cellular_component:polytene chromosome	GO:0003677:molecular_function:DNA binding	GO:0008301:molecular_function:DNA binding, bending	GO:0003697:molecular_function:single-stranded DNA binding	GO:0017025:molecular_function:TBP-class protein binding	GO:0008134:molecular_function:transcription factor binding	GO:0006338:biological_process:chromatin remodeling	GO:0032502:biological_process:developmental process	GO:0006268:biological_process:DNA unwinding involved in DNA replication	GO:0035218:biological_process:leg disc development	GO:0008348:biological_process:negative regulation of antimicrobial humoral response	GO:0017055:biological_process:negative regulation of RNA polymerase II transcriptional preinitiation complex assembly	GO:0000122:biological_process:negative regulation of transcription from RNA polymerase II promoter	GO:0045892:biological_process:negative regulation of transcription, DNA-templated	GO:0043388:biological_process:positive regulation of DNA binding	GO:0007379:biological_process:segment specification
Locus_15303.0|BlastHit|gi|75055245|sp|Q5REU4.1|SND1_PONAB	2513	GO:0042470:cellular_component:melanosome	GO:0005634:cellular_component:nucleus	GO:0016442:cellular_component:RISC complex	GO:0004518:molecular_function:nuclease activity	GO:0003676:molecular_function:nucleic acid binding	GO:0031047:biological_process:gene silencing by RNA	GO:0006355:biological_process:regulation of transcription, DNA-templated	GO:0006351:biological_process:transcription, DNA-templated
Locus_15311.0|BlastHit|gi|1703324|sp|P54864.1|JUN_SERCA	2516	GO:0005634:cellular_component:nucleus	GO:0043565:molecular_function:sequence-specific DNA binding	GO:0003700:molecular_function:sequence-specific DNA binding transcription factor activity	GO:0006351:biological_process:transcription, DNA-templated
Locus_15367.0|BlastHit|gi|74762123|sp|O95238.1|SPDEF_HUMAN	2538	GO:0005634:cellular_component:nucleus	GO:0043565:molecular_function:sequence-specific DNA binding	GO:0000981:molecular_function:sequence-specific DNA binding RNA polymerase II transcription factor activity	GO:0030154:biological_process:cell differentiation	GO:0060576:biological_process:intestinal epithelial cell development	GO:0060480:biological_process:lung goblet cell differentiation	GO:0007275:biological_process:multicellular organismal development	GO:0010454:biological_process:negative regulation of cell fate commitment	GO:0000122:biological_process:negative regulation of transcription from RNA polymerase II promoter	GO:0043065:biological_process:positive regulation of apoptotic process	GO:0010455:biological_process:positive regulation of cell fate commitment	GO:0045944:biological_process:positive regulation of transcription from RNA polymerase II promoter	GO:0006366:biological_process:transcription from RNA polymerase II promoter
Locus_15375.0|BlastHit|gi|6094094|sp|O57592.3|RL7A_FUGRU	2542	GO:0022625:cellular_component:cytosolic large ribosomal subunit	GO:0070062:cellular_component:extracellular vesicular exosome	GO:0016020:cellular_component:membrane	GO:0005634:cellular_component:nucleus	GO:0042788:cellular_component:polysomal ribosome	GO:0044822:molecular_function:poly(A) RNA binding	GO:0042254:biological_process:ribosome biogenesis
Locus_15375.0|BlastHit|gi|6094094|sp|O57592.3|RL7A_FUGRU	2542	GO:0005840:cellular_component:ribosome	GO:0003735:molecular_function:structural constituent of ribosome	GO:0051298:biological_process:centrosome duplication	GO:0051297:biological_process:centrosome organization	GO:0000022:biological_process:mitotic spindle elongation	GO:0007052:biological_process:mitotic spindle organization	GO:0042254:biological_process:ribosome biogenesis
Locus_15393.0|BlastHit|gi|52783446|sp|Q6XHI1.1|THIO2_DROYA	2555	GO:0015035:molecular_function:protein disulfide oxidoreductase activity	GO:0045454:biological_process:cell redox homeostasis	GO:0006662:biological_process:glycerol ether metabolic process
Locus_15409.0|BlastHit|gi|82245450|sp|Q90XG0.1|TPISB_DANRE	2561	GO:0004807:molecular_function:triose-phosphate isomerase activity	GO:0006094:biological_process:gluconeogenesis	GO:0006096:biological_process:glycolytic process	GO:0006098:biological_process:pentose-phosphate shunt
Locus_15433.0|BlastHit|gi|2500371|sp|Q24154.1|RL29_DROME	2569	GO:0005840:cellular_component:ribosome	GO:0003682:molecular_function:chromatin binding	GO:0003735:molecular_function:structural constituent of ribosome	GO:0006412:biological_process:translation
Locus_15436.0|BlastHit|gi|81175197|sp|P18489.3|SYB_DROME	2571	GO:0030054:cellular_component:cell junction	GO:0016021:cellular_component:integral component of membrane	GO:0043005:cellular_component:neuron projection	GO:0005886:cellular_component:plasma membrane	GO:0008021:cellular_component:synaptic vesicle	GO:0030672:cellular_component:synaptic vesicle membrane	GO:0005484:molecular_function:SNAP receptor activity	GO:0035149:biological_process:lumen formation, open tracheal system	GO:0007269:biological_process:neurotransmitter secretion	GO:0016081:biological_process:synaptic vesicle docking	GO:0016192:biological_process:vesicle-mediated transport
Locus_15552.0|BlastHit|gi|134516|sp|P17863.1|SKI_AVIES	2611	GO:0042025:cellular_component:host cell nucleus	GO:0006351:biological_process:transcription, DNA-templated
Locus_15627.0|BlastHit|gi|1172773|sp|P42669.1|PURA_MOUSE	2644	GO:0005737:cellular_component:cytoplasm	GO:0030425:cellular_component:dendrite	GO:0005662:cellular_component:DNA replication factor A complex	GO:0043025:cellular_component:neuronal cell body	GO:0005634:cellular_component:nucleus	GO:0003677:molecular_function:DNA binding	GO:0003690:molecular_function:double-stranded DNA binding	GO:0003691:molecular_function:double-stranded telomeric DNA binding	GO:0044822:molecular_function:poly(A) RNA binding	GO:0032422:molecular_function:purine-rich negative regulatory element binding	GO:0003700:molecular_function:sequence-specific DNA binding transcription factor activity	GO:0003697:molecular_function:single-stranded DNA binding	GO:0046332:molecular_function:SMAD binding	GO:0008134:molecular_function:transcription factor binding	GO:0000900:molecular_function:translation repressor activity, nucleic acid binding	GO:0006915:biological_process:apoptotic process	GO:0030154:biological_process:cell differentiation	GO:0008283:biological_process:cell proliferation	GO:0006268:biological_process:DNA unwinding involved in DNA replication	GO:0007093:biological_process:mitotic cell cycle checkpoint	GO:0045892:biological_process:negative regulation of transcription, DNA-templated	GO:0017148:biological_process:negative regulation of translation	GO:0007399:biological_process:nervous system development	GO:0008284:biological_process:positive regulation of cell proliferation	GO:0006351:biological_process:transcription, DNA-templated
Locus_15717.0|BlastHit|gi|296434394|sp|Q96Q42.2|ALS2_HUMAN	2657	GO:0005813:cellular_component:centrosome	GO:0005829:cellular_component:cytosol	GO:0030425:cellular_component:dendrite	GO:0043197:cellular_component:dendritic spine	GO:0005769:cellular_component:early endosome	GO:0030426:cellular_component:growth cone	GO:0030027:cellular_component:lamellipodium	GO:0014069:cellular_component:postsynaptic density	GO:0043234:cellular_component:protein complex	GO:0001726:cellular_component:ruffle	GO:0031982:cellular_component:vesicle	GO:0042803:molecular_function:protein homodimerization activity	GO:0043539:molecular_function:protein serine/threonine kinase activator activity	GO:0017137:molecular_function:Rab GTPase binding	GO:0017112:molecular_function:Rab guanyl-nucleotide exchange factor activity	GO:0030676:molecular_function:Rac guanyl-nucleotide exchange factor activity	GO:0005087:molecular_function:Ran guanyl-nucleotide exchange factor activity	GO:0001662:biological_process:behavioral fear response	GO:0016197:biological_process:endosomal transport	GO:0007032:biological_process:endosome organization	GO:0007626:biological_process:locomotory behavior	GO:0007528:biological_process:neuromuscular junction development	GO:0048812:biological_process:neuron projection morphogenesis	GO:0045860:biological_process:positive regulation of protein kinase activity	GO:0071902:biological_process:positive regulation of protein serine/threonine kinase activity	GO:0032851:biological_process:positive regulation of Rab GTPase activity	GO:0032855:biological_process:positive regulation of Rac GTPase activity	GO:0035022:biological_process:positive regulation of Rac protein signal transduction	GO:0032853:biological_process:positive regulation of Ran GTPase activity	GO:0008104:biological_process:protein localization	GO:0001881:biological_process:receptor recycling	GO:0051036:biological_process:regulation of endosome size	GO:0006979:biological_process:response to oxidative stress	GO:0035249:biological_process:synaptic transmission, glutamatergic	GO:0016050:biological_process:vesicle organization
Locus_16076.0|BlastHit|gi|44888286|sp|Q96FW1.2|OTUB1_HUMAN	2751	GO:0005737:cellular_component:cytoplasm	GO:0070062:cellular_component:extracellular vesicular exosome	GO:0019784:molecular_function:NEDD8-specific protease activity	GO:0008242:molecular_function:omega peptidase activity	GO:0043130:molecular_function:ubiquitin binding	GO:0031625:molecular_function:ubiquitin protein ligase binding	GO:0004843:molecular_function:ubiquitin-specific protease activity	GO:0006974:biological_process:cellular response to DNA damage stimulus	GO:0006281:biological_process:DNA repair	GO:0002376:biological_process:immune system process	GO:2000780:biological_process:negative regulation of double-strand break repair	GO:1901315:biological_process:negative regulation of histone H2A K63-linked ubiquitination	GO:0071108:biological_process:protein K48-linked deubiquitination
Locus_16256.0|BlastHit|gi|33302635|sp|Q9VMW9.2|GMDS_DROME	2801	GO:0050662:molecular_function:coenzyme binding	GO:0008446:molecular_function:GDP-mannose 4,6-dehydratase activity	GO:0042351:biological_process:'de novo' GDP-L-fucose biosynthetic process	GO:0042350:biological_process:GDP-L-fucose biosynthetic process	GO:0019673:biological_process:GDP-mannose metabolic process	GO:0007219:biological_process:Notch signaling pathway	GO:0048477:biological_process:oogenesis	GO:2000035:biological_process:regulation of stem cell division
Locus_16298.0|BlastHit|gi|55584091|sp|P49415.2|SDC_DROME	2813	GO:0005925:cellular_component:focal adhesion	GO:0016021:cellular_component:integral component of membrane	GO:0031594:cellular_component:neuromuscular junction	GO:0045202:cellular_component:synapse	GO:0007411:biological_process:axon guidance	GO:0050908:biological_process:detection of light stimulus involved in visual perception	GO:0097009:biological_process:energy homeostasis	GO:0007427:biological_process:epithelial cell migration, open tracheal system	GO:0008045:biological_process:motor neuron axon guidance	GO:0007517:biological_process:muscle organ development	GO:2000637:biological_process:positive regulation of gene silencing by miRNA	GO:0045887:biological_process:positive regulation of synaptic growth at neuromuscular junction	GO:0044246:biological_process:regulation of multicellular organismal metabolic process
Locus_16329.0|BlastHit|gi|119370654|sp|Q28C98.1|MESH1_XENTR	2825	GO:0008893:molecular_function:guanosine-3',5'-bis(diphosphate) 3'-diphosphatase activity	GO:0046872:molecular_function:metal ion binding
Locus_16454.0|BlastHit|gi|52782788|sp|Q91WN1.2|DNJC9_MOUSE	2860	GO:0005634:cellular_component:nucleus	GO:0035176:biological_process:social behavior
Locus_16571.0|BlastHit|gi|1703454|sp|P07584.2|ASTA_ASTFL	2892	GO:0060473:cellular_component:cortical granule	GO:0005737:cellular_component:cytoplasm	GO:0005886:cellular_component:plasma membrane	GO:0070001:molecular_function:aspartic-type peptidase activity	GO:0070002:molecular_function:glutamic-type peptidase activity	GO:0004222:molecular_function:metalloendopeptidase activity	GO:0008233:molecular_function:peptidase activity	GO:0008270:molecular_function:zinc ion binding	GO:0007155:biological_process:cell adhesion	GO:0009566:biological_process:fertilization	GO:2000360:biological_process:negative regulation of binding of sperm to zona pellucida	GO:0010954:biological_process:positive regulation of protein processing	GO:0060468:biological_process:prevention of polyspermy
Locus_16764.0|BlastHit|gi|296434488|sp|Q66K89.2|E4F1_HUMAN	2941	GO:0005737:cellular_component:cytoplasm	GO:0005654:cellular_component:nucleoplasm	GO:0005634:cellular_component:nucleus	GO:0005819:cellular_component:spindle	GO:0035497:molecular_function:cAMP response element binding	GO:0003677:molecular_function:DNA binding	GO:0016874:molecular_function:ligase activity	GO:0046872:molecular_function:metal ion binding	GO:0000977:molecular_function:RNA polymerase II regulatory region sequence-specific DNA binding	GO:0001227:molecular_function:RNA polymerase II transcription regulatory region sequence-specific DNA binding transcription factor activity involved in negative regulation of transcription	GO:0003700:molecular_function:sequence-specific DNA binding transcription factor activity	GO:0003713:molecular_function:transcription coactivator activity	GO:0003714:molecular_function:transcription corepressor activity	GO:0008283:biological_process:cell proliferation	GO:0006260:biological_process:DNA replication	GO:0071850:biological_process:mitotic cell cycle arrest	GO:0007067:biological_process:mitotic nuclear division	GO:0000122:biological_process:negative regulation of transcription from RNA polymerase II promoter	GO:0016567:biological_process:protein ubiquitination	GO:0010564:biological_process:regulation of cell cycle process	GO:0040008:biological_process:regulation of growth	GO:0009794:biological_process:regulation of mitotic cell cycle, embryonic	GO:0016032:biological_process:viral process
Locus_16772.0|BlastHit|gi|122135200|sp|Q27HK4.1|MTX1_PIG	2948	GO:0016021:cellular_component:integral component of membrane	GO:0005743:cellular_component:mitochondrial inner membrane	GO:0005741:cellular_component:mitochondrial outer membrane	GO:0006626:biological_process:protein targeting to mitochondrion
Locus_16820.0|BlastHit|gi|46577638|sp|P61026.1|RAB10_HUMAN	2958	GO:0005789:cellular_component:endoplasmic reticulum membrane	GO:0071782:cellular_component:endoplasmic reticulum tubular network	GO:0005768:cellular_component:endosome	GO:0070062:cellular_component:extracellular vesicular exosome	GO:0005794:cellular_component:Golgi apparatus	GO:0032593:cellular_component:insulin-responsive compartment	GO:0030670:cellular_component:phagocytic vesicle membrane	GO:0005886:cellular_component:plasma membrane	GO:0072372:cellular_component:primary cilium	GO:0055037:cellular_component:recycling endosome	GO:0055038:cellular_component:recycling endosome membrane	GO:0005802:cellular_component:trans-Golgi network	GO:0019003:molecular_function:GDP binding	GO:0005525:molecular_function:GTP binding	GO:0019882:biological_process:antigen processing and presentation	GO:0007409:biological_process:axonogenesis	GO:0061467:biological_process:basolateral protein localization	GO:0032869:biological_process:cellular response to insulin stimulus	GO:0071786:biological_process:endoplasmic reticulum tubular network organization	GO:0016197:biological_process:endosomal transport	GO:0045200:biological_process:establishment of neuroblast polarity	GO:0097051:biological_process:establishment of protein localization to endoplasmic reticulum membrane	GO:0043001:biological_process:Golgi to plasma membrane protein transport	GO:0006893:biological_process:Golgi to plasma membrane transport	GO:0030859:biological_process:polarized epithelial cell differentiation	GO:0072659:biological_process:protein localization to plasma membrane	GO:0007264:biological_process:small GTPase mediated signal transduction	GO:0016192:biological_process:vesicle-mediated transport
Locus_17134.0|BlastHit|gi|82243463|sp|Q8JG64.1|PDIA3_CHICK	3079	GO:0005783:cellular_component:endoplasmic reticulum	GO:0005788:cellular_component:endoplasmic reticulum lumen	GO:0042470:cellular_component:melanosome	GO:0003756:molecular_function:protein disulfide isomerase activity	GO:0045454:biological_process:cell redox homeostasis	GO:0043065:biological_process:positive regulation of apoptotic process
Locus_17150.0|BlastHit|gi|172048427|sp|A9UMU8.1|CG059_XENTR	3087	GO:0005764:cellular_component:lysosome	GO:0071986:cellular_component:Ragulator complex	GO:0071230:biological_process:cellular response to amino acid stimulus	GO:0043547:biological_process:positive regulation of GTPase activity	GO:0032008:biological_process:positive regulation of TOR signaling	GO:0061462:biological_process:protein localization to lysosome	GO:0008361:biological_process:regulation of cell size
Locus_17185.0|BlastHit|gi|30316286|sp|Q9C285.1|RL12_NEUCR	3107	GO:0016021:cellular_component:integral component of membrane
Locus_17185.0|BlastHit|gi|30316286|sp|Q9C285.1|RL12_NEUCR	3107	GO:0016021:cellular_component:integral component of membrane
Locus_17185.0|BlastHit|gi|30316286|sp|Q9C285.1|RL12_NEUCR	3107	GO:0005840:cellular_component:ribosome	GO:0003723:molecular_function:RNA binding	GO:0003735:molecular_function:structural constituent of ribosome	GO:0006412:biological_process:translation
Locus_17188.0|BlastHit|gi|132653|sp|P23358.1|RL12_RAT	3109	GO:0005840:cellular_component:ribosome	GO:0003723:molecular_function:RNA binding	GO:0003735:molecular_function:structural constituent of ribosome	GO:0006412:biological_process:translation
Locus_17188.0|BlastHit|gi|132653|sp|P23358.1|RL12_RAT	3110	GO:0005840:cellular_component:ribosome	GO:0003723:molecular_function:RNA binding	GO:0003735:molecular_function:structural constituent of ribosome	GO:0006412:biological_process:translation
Locus_17189.0|BlastHit|gi|51316652|sp|Q6PBI5.1|RS25_DANRE	3111	GO:0005840:cellular_component:ribosome
Locus_17224.0|BlastHit|gi|3023703|sp|P56252.1|ENO_HOMGA	3132	GO:0000015:cellular_component:phosphopyruvate hydratase complex	GO:0000287:molecular_function:magnesium ion binding	GO:0004634:molecular_function:phosphopyruvate hydratase activity	GO:0006096:biological_process:glycolytic process
Locus_17245.0|BlastHit|gi|110825729|sp|P05661.4|MYSA_DROME	3147	GO:0031672:cellular_component:A band	GO:0016459:cellular_component:myosin complex	GO:0032982:cellular_component:myosin filament	GO:0005703:cellular_component:polytene chromosome puff	GO:0030017:cellular_component:sarcomere	GO:0030898:molecular_function:actin-dependent ATPase activity	GO:0005524:molecular_function:ATP binding	GO:0042623:molecular_function:ATPase activity, coupled	GO:0003774:molecular_function:motor activity	GO:0042803:molecular_function:protein homodimerization activity	GO:0008307:molecular_function:structural constituent of muscle	GO:0007527:biological_process:adult somatic muscle development	GO:0006200:biological_process:ATP catabolic process	GO:0007298:biological_process:border follicle cell migration	GO:0007427:biological_process:epithelial cell migration, open tracheal system	GO:0060361:biological_process:flight	GO:0040011:biological_process:locomotion	GO:0042692:biological_process:muscle cell differentiation	GO:0006936:biological_process:muscle contraction	GO:0007517:biological_process:muscle organ development	GO:0030239:biological_process:myofibril assembly	GO:0031033:biological_process:myosin filament organization	GO:0050821:biological_process:protein stabilization	GO:0045214:biological_process:sarcomere organization	GO:0030241:biological_process:skeletal muscle myosin thick filament assembly
Locus_17256.0|BlastHit|gi|73920250|sp|P61759.2|PFD3_MOUSE	3151	GO:0005737:cellular_component:cytoplasm	GO:0005634:cellular_component:nucleus	GO:0016272:cellular_component:prefoldin complex	GO:0006457:biological_process:protein folding
Locus_17258.0|BlastHit|gi|12644468|sp|Q94514.2|COX5A_DROME	3153	GO:0005811:cellular_component:lipid particle	GO:0005743:cellular_component:mitochondrial inner membrane	GO:0005739:cellular_component:mitochondrion	GO:0004129:molecular_function:cytochrome-c oxidase activity	GO:0046872:molecular_function:metal ion binding	GO:0045787:biological_process:positive regulation of cell cycle
Locus_17275.0|BlastHit|gi|224487926|sp|B4NJR8.1|EI3F1_DROWI	3158	GO:0016282:cellular_component:eukaryotic 43S preinitiation complex	GO:0033290:cellular_component:eukaryotic 48S preinitiation complex	GO:0005852:cellular_component:eukaryotic translation initiation factor 3 complex	GO:0003743:molecular_function:translation initiation factor activity	GO:0001731:biological_process:formation of translation preinitiation complex	GO:0006446:biological_process:regulation of translational initiation
Locus_17320.0|BlastHit|gi|122145286|sp|Q0IIF2.1|EI2BA_BOVIN	3166	GO:0005737:cellular_component:cytoplasm	GO:0005851:cellular_component:eukaryotic translation initiation factor 2B complex	GO:0005886:cellular_component:plasma membrane	GO:0005085:molecular_function:guanyl-nucleotide exchange factor activity	GO:0003743:molecular_function:translation initiation factor activity	GO:0051716:biological_process:cellular response to stimulus	GO:0014003:biological_process:oligodendrocyte development	GO:0006446:biological_process:regulation of translational initiation
Locus_17331.0|BlastHit|gi|231502|sp|P30170.1|ACT10_SOLTU	3167	GO:0005737:cellular_component:cytoplasm	GO:0005856:cellular_component:cytoskeleton	GO:0005524:molecular_function:ATP binding
Locus_17386.0|BlastHit|gi|20139649|sp|Q99N92.1|RM27_MOUSE	3183	GO:0005739:cellular_component:mitochondrion	GO:0005840:cellular_component:ribosome	GO:0044822:molecular_function:poly(A) RNA binding	GO:0003735:molecular_function:structural constituent of ribosome	GO:0006412:biological_process:translation
Locus_17399.0|BlastHit|gi|82181462|sp|Q66KC4.1|HSDL2_XENTR	3199	GO:0005634:cellular_component:nucleus	GO:0003700:molecular_function:sequence-specific DNA binding transcription factor activity	GO:0048511:biological_process:rhythmic process	GO:0006351:biological_process:transcription, DNA-templated
Locus_17399.0|BlastHit|gi|82181462|sp|Q66KC4.1|HSDL2_XENTR	3199	GO:0005777:cellular_component:peroxisome	GO:0016491:molecular_function:oxidoreductase activity
Locus_17403.0|BlastHit|gi|462690|sp|Q05982.1|NDKA_RAT	3202	GO:0005853:cellular_component:eukaryotic translation elongation factor 1 complex	GO:0003746:molecular_function:translation elongation factor activity
Locus_17403.0|BlastHit|gi|462690|sp|Q05982.1|NDKA_RAT	3202	GO:0071944:cellular_component:cell periphery	GO:0005813:cellular_component:centrosome	GO:0005829:cellular_component:cytosol	GO:0070062:cellular_component:extracellular vesicular exosome	GO:0030027:cellular_component:lamellipodium	GO:0016020:cellular_component:membrane	GO:0005634:cellular_component:nucleus	GO:0048471:cellular_component:perinuclear region of cytoplasm	GO:0001726:cellular_component:ruffle	GO:0005524:molecular_function:ATP binding	GO:0019899:molecular_function:enzyme binding	GO:0043015:molecular_function:gamma-tubulin binding	GO:0019215:molecular_function:intermediate filament binding	GO:0046872:molecular_function:metal ion binding	GO:0004550:molecular_function:nucleoside diphosphate kinase activity	GO:0019901:molecular_function:protein kinase binding	GO:0000977:molecular_function:RNA polymerase II regulatory region sequence-specific DNA binding	GO:0003697:molecular_function:single-stranded DNA binding	GO:0035690:biological_process:cellular response to drug	GO:0071398:biological_process:cellular response to fatty acid	GO:0071333:biological_process:cellular response to glucose stimulus	GO:0006241:biological_process:CTP biosynthetic process	GO:0006897:biological_process:endocytosis	GO:0006183:biological_process:GTP biosynthetic process	GO:0021766:biological_process:hippocampus development	GO:0007229:biological_process:integrin-mediated signaling pathway	GO:0043066:biological_process:negative regulation of apoptotic process	GO:0010629:biological_process:negative regulation of gene expression	GO:0002762:biological_process:negative regulation of myeloid leukocyte differentiation	GO:0006165:biological_process:nucleoside diphosphate phosphorylation	GO:0050679:biological_process:positive regulation of epithelial cell proliferation	GO:0045618:biological_process:positive regulation of keratinocyte differentiation	GO:0010976:biological_process:positive regulation of neuron projection development	GO:0045944:biological_process:positive regulation of transcription from RNA polymerase II promoter	GO:0014075:biological_process:response to amine	GO:0051591:biological_process:response to cAMP
Locus_17406.0|BlastHit|gi|29427664|sp|P91918.1|RSMB_CAEEL	3204	GO:0015030:cellular_component:Cajal body	GO:0071013:cellular_component:catalytic step 2 spliceosome	GO:0005634:cellular_component:nucleus	GO:0045495:cellular_component:pole plasm	GO:0071011:cellular_component:precatalytic spliceosome	GO:0030532:cellular_component:small nuclear ribonucleoprotein complex	GO:0005681:cellular_component:spliceosomal complex	GO:0003723:molecular_function:RNA binding	GO:0007281:biological_process:germ cell development	GO:0008406:biological_process:gonad development	GO:0007052:biological_process:mitotic spindle organization	GO:0000398:biological_process:mRNA splicing, via spliceosome
Locus_17409.0|BlastHit|gi|2498913|sp|Q24524.1|SING_DROME	3207	GO:0015629:cellular_component:actin cytoskeleton	GO:0005737:cellular_component:cytoplasm	GO:0043005:cellular_component:neuron projection	GO:0043025:cellular_component:neuronal cell body	GO:0003779:molecular_function:actin binding	GO:0051015:molecular_function:actin filament binding	GO:0030036:biological_process:actin cytoskeleton organization	GO:0051017:biological_process:actin filament bundle assembly	GO:0007015:biological_process:actin filament organization	GO:0048800:biological_process:antennal morphogenesis	GO:0008407:biological_process:chaeta morphogenesis	GO:0035017:biological_process:cuticle pattern formation	GO:0016358:biological_process:dendrite development	GO:0009913:biological_process:epidermal cell differentiation	GO:0007163:biological_process:establishment or maintenance of cell polarity	GO:0046847:biological_process:filopodium assembly	GO:0035099:biological_process:hemocyte migration	GO:0035317:biological_process:imaginal disc-derived wing hair organization	GO:0030034:biological_process:microvillar actin bundle assembly	GO:0048812:biological_process:neuron projection morphogenesis	GO:0048477:biological_process:oogenesis	GO:0042060:biological_process:wound healing
Locus_17411.0|BlastHit|gi|109894874|sp|Q3T134.1|SPCS1_BOVIN	3208	GO:0016021:cellular_component:integral component of membrane	GO:0005787:cellular_component:signal peptidase complex	GO:0008233:molecular_function:peptidase activity	GO:0006465:biological_process:signal peptide processing
Locus_17431.0|BlastHit|gi|57013091|sp|Q924S7.1|SPRE2_MOUSE	3218	GO:0030658:cellular_component:transport vesicle membrane	GO:0007275:biological_process:multicellular organismal development	GO:0009966:biological_process:regulation of signal transduction
Locus_17643.0|BlastHit|gi|22001886|sp|Q963B6.1|RL10A_SPOFR	3299	GO:0015934:cellular_component:large ribosomal subunit	GO:0003723:molecular_function:RNA binding	GO:0003735:molecular_function:structural constituent of ribosome	GO:0006412:biological_process:translation
Locus_17643.0|BlastHit|gi|22001886|sp|Q963B6.1|RL10A_SPOFR	3300	GO:0015934:cellular_component:large ribosomal subunit	GO:0003723:molecular_function:RNA binding	GO:0003735:molecular_function:structural constituent of ribosome	GO:0006412:biological_process:translation
Locus_17663.0|BlastHit|gi|728796|sp|P41339.1|ACTA_LIMPO	3310	GO:0005737:cellular_component:cytoplasm	GO:0005856:cellular_component:cytoskeleton	GO:0005524:molecular_function:ATP binding
Locus_17984.1|BlastHit|gi|3287776|sp|P81388.1|CU04_HOMAM	3400	GO:0042302:molecular_function:structural constituent of cuticle
Locus_18026.0|BlastHit|gi|82179806|sp|Q5RJX8.1|SU41B_XENLA	3413	GO:0005720:cellular_component:nuclear heterochromatin	GO:0005634:cellular_component:nucleus	GO:0005700:cellular_component:polytene chromosome	GO:0042799:molecular_function:histone methyltransferase activity (H4-K20 specific)	GO:0006342:biological_process:chromatin silencing	GO:0034772:biological_process:histone H4-K20 dimethylation	GO:0034770:biological_process:histone H4-K20 methylation	GO:0034773:biological_process:histone H4-K20 trimethylation	GO:0016571:biological_process:histone methylation	GO:0040029:biological_process:regulation of gene expression, epigenetic	GO:0006351:biological_process:transcription, DNA-templated
Locus_18046.0|BlastHit|gi|55976403|sp|Q6GLM9.1|CSN5_XENLA	3425	GO:0008180:cellular_component:COP9 signalosome	GO:0048471:cellular_component:perinuclear region of cytoplasm	GO:0046872:molecular_function:metal ion binding	GO:0008237:molecular_function:metallopeptidase activity
Locus_18077.0|BlastHit|gi|14285503|sp|Q61249.1|IGBP1_MOUSE	3442	GO:0005737:cellular_component:cytoplasm	GO:0019208:molecular_function:phosphatase regulator activity	GO:0042113:biological_process:B cell activation	GO:0050790:biological_process:regulation of catalytic activity	GO:0009966:biological_process:regulation of signal transduction	GO:0007165:biological_process:signal transduction
Locus_18105.0|BlastHit|gi|2495346|sp|Q91233.1|HSP70_ONCTS	3464	GO:0005524:molecular_function:ATP binding
Locus_18124.0|BlastHit|gi|134315|sp|P02635.1|SCPB_PENSP	3473	GO:0005509:molecular_function:calcium ion binding
Locus_18156.0|BlastHit|gi|51701837|sp|Q962T1.1|RL32_SPOFR	3484	GO:0005840:cellular_component:ribosome	GO:0003735:molecular_function:structural constituent of ribosome	GO:0006412:biological_process:translation
Locus_18170.0|BlastHit|gi|14286117|sp|Q24251.2|ATP5H_DROME	3488	GO:0005811:cellular_component:lipid particle	GO:0005875:cellular_component:microtubule associated complex	GO:0000276:cellular_component:mitochondrial proton-transporting ATP synthase complex, coupling factor F(o)	GO:0005739:cellular_component:mitochondrion	GO:0015078:molecular_function:hydrogen ion transmembrane transporter activity	GO:0015986:biological_process:ATP synthesis coupled proton transport
Locus_18189.0|BlastHit|gi|3287775|sp|P81387.1|CU03_HOMAM	3495	GO:0042302:molecular_function:structural constituent of cuticle
Locus_18214.0|BlastHit|gi|41712398|sp|P40798.2|STC_DROME	3505	GO:0005634:cellular_component:nucleus	GO:0003677:molecular_function:DNA binding	GO:0003723:molecular_function:RNA binding	GO:0003700:molecular_function:sequence-specific DNA binding transcription factor activity	GO:0008270:molecular_function:zinc ion binding	GO:0006355:biological_process:regulation of transcription, DNA-templated	GO:0006351:biological_process:transcription, DNA-templated
Locus_18268.0|BlastHit|gi|83302472|sp|P56571.2|ES1_RAT	3524	GO:0005739:cellular_component:mitochondrion
Locus_18275.0|BlastHit|gi|122137121|sp|Q2TFN9.1|HSP74_CANFA	3529	GO:0005737:cellular_component:cytoplasm	GO:0005829:cellular_component:cytosol	GO:0005634:cellular_component:nucleus	GO:0005524:molecular_function:ATP binding	GO:0006457:biological_process:protein folding	GO:0006986:biological_process:response to unfolded protein
Locus_18288.0|BlastHit|gi|75067975|sp|Q9N1Q4.1|LAT2_RABIT	3541	GO:0016323:cellular_component:basolateral plasma membrane	GO:0016021:cellular_component:integral component of membrane	GO:0015171:molecular_function:amino acid transmembrane transporter activity	GO:0015297:molecular_function:antiporter activity
Locus_18315.0|BlastHit|gi|82241885|sp|Q803V5.1|LST8_DANRE	3561	GO:0005737:cellular_component:cytoplasm
Locus_18330.0|BlastHit|gi|82182278|sp|Q6DCP6.1|DYM_XENLA	3567	GO:0005737:cellular_component:cytoplasm	GO:0005794:cellular_component:Golgi apparatus	GO:0060348:biological_process:bone development	GO:0007030:biological_process:Golgi organization
Locus_18345.0|BlastHit|gi|172044540|sp|P0C6G6.1|MYP2_HORSE	3574	GO:0005737:cellular_component:cytoplasm	GO:0008289:molecular_function:lipid binding	GO:0005215:molecular_function:transporter activity
Locus_18398.0|BlastHit|gi|82181735|sp|Q68EU8.1|TMM93_XENLA	3594	GO:0072546:cellular_component:ER membrane protein complex	GO:0016021:cellular_component:integral component of membrane
Locus_18421.0|BlastHit|gi|12229871|sp|Q9VMW8.2|MPU1_DROME	3606	GO:0016021:cellular_component:integral component of membrane	GO:0006810:biological_process:transport
Locus_18430.0|BlastHit|gi|110825729|sp|P05661.4|MYSA_DROME	3608	GO:0031672:cellular_component:A band	GO:0016459:cellular_component:myosin complex	GO:0032982:cellular_component:myosin filament	GO:0005703:cellular_component:polytene chromosome puff	GO:0030017:cellular_component:sarcomere	GO:0030898:molecular_function:actin-dependent ATPase activity	GO:0005524:molecular_function:ATP binding	GO:0042623:molecular_function:ATPase activity, coupled	GO:0003774:molecular_function:motor activity	GO:0042803:molecular_function:protein homodimerization activity	GO:0008307:molecular_function:structural constituent of muscle	GO:0007527:biological_process:adult somatic muscle development	GO:0006200:biological_process:ATP catabolic process	GO:0007298:biological_process:border follicle cell migration	GO:0007427:biological_process:epithelial cell migration, open tracheal system	GO:0060361:biological_process:flight	GO:0040011:biological_process:locomotion	GO:0042692:biological_process:muscle cell differentiation	GO:0006936:biological_process:muscle contraction	GO:0007517:biological_process:muscle organ development	GO:0030239:biological_process:myofibril assembly	GO:0031033:biological_process:myosin filament organization	GO:0050821:biological_process:protein stabilization	GO:0045214:biological_process:sarcomere organization	GO:0030241:biological_process:skeletal muscle myosin thick filament assembly
Locus_18439.0|BlastHit|gi|122064257|sp|Q0VD01.1|IMP4_BOVIN	3613	GO:0005730:cellular_component:nucleolus	GO:0030529:cellular_component:ribonucleoprotein complex	GO:0006364:biological_process:rRNA processing
Locus_18446.0|BlastHit|gi|85701378|sp|P48612.2|PELO_DROME	3615	GO:0005737:cellular_component:cytoplasm	GO:0005634:cellular_component:nucleus	GO:0004519:molecular_function:endonuclease activity	GO:0046872:molecular_function:metal ion binding	GO:0001745:biological_process:compound eye morphogenesis	GO:0048132:biological_process:female germ-line stem cell asymmetric division	GO:0030718:biological_process:germ-line stem cell maintenance	GO:0007140:biological_process:male meiosis	GO:0007141:biological_process:male meiosis I	GO:0008315:biological_process:meiotic G2/MI transition	GO:0007126:biological_process:meiotic nuclear division	GO:0051078:biological_process:meiotic nuclear envelope disassembly	GO:0000212:biological_process:meiotic spindle organization	GO:0007067:biological_process:mitotic nuclear division	GO:0070966:biological_process:nuclear-transcribed mRNA catabolic process, no-go decay	GO:0070481:biological_process:nuclear-transcribed mRNA catabolic process, non-stop decay	GO:0071025:biological_process:RNA surveillance	GO:0048137:biological_process:spermatocyte division	GO:0007283:biological_process:spermatogenesis
Locus_18449.0|BlastHit|gi|74947368|sp|Q9V439.1|MED22_DROME	3616	GO:0016592:cellular_component:mediator complex	GO:0005634:cellular_component:nucleus	GO:0001104:molecular_function:RNA polymerase II transcription cofactor activity	GO:0007067:biological_process:mitotic nuclear division	GO:0006357:biological_process:regulation of transcription from RNA polymerase II promoter	GO:0006366:biological_process:transcription from RNA polymerase II promoter
Locus_18493.0|BlastHit|gi|25091539|sp|Q969T9.1|WBP2_HUMAN	3632	GO:0000790:cellular_component:nuclear chromatin	GO:0031490:molecular_function:chromatin DNA binding	GO:0000979:molecular_function:RNA polymerase II core promoter sequence-specific DNA binding	GO:0001105:molecular_function:RNA polymerase II transcription coactivator activity	GO:0071391:biological_process:cellular response to estrogen stimulus	GO:0045184:biological_process:establishment of protein localization	GO:0045815:biological_process:positive regulation of gene expression, epigenetic	GO:0071442:biological_process:positive regulation of histone H3-K14 acetylation	GO:0045944:biological_process:positive regulation of transcription from RNA polymerase II promoter
Locus_18497.0|BlastHit|gi|82081744|sp|Q5ZJQ7.1|SSU72_CHICK	3635	GO:0005737:cellular_component:cytoplasm	GO:0005634:cellular_component:nucleus	GO:0008420:molecular_function:CTD phosphatase activity	GO:0070940:biological_process:dephosphorylation of RNA polymerase II C-terminal domain	GO:0006378:biological_process:mRNA polyadenylation
Locus_18556.0|BlastHit|gi|12644106|sp|P08155.2|KRUH_DROME	3660	GO:0005634:cellular_component:nucleus	GO:0003677:molecular_function:DNA binding	GO:0046872:molecular_function:metal ion binding	GO:0003700:molecular_function:sequence-specific DNA binding transcription factor activity	GO:0007552:biological_process:metamorphosis	GO:0045316:biological_process:negative regulation of compound eye photoreceptor development	GO:0010977:biological_process:negative regulation of neuron projection development	GO:0006355:biological_process:regulation of transcription, DNA-templated	GO:0035075:biological_process:response to ecdysone
Locus_18605.0|BlastHit|gi|74868451|sp|Q9VD92.1|ARCH_DROME	3675	GO:0046872:molecular_function:metal ion binding	GO:0022008:biological_process:neurogenesis	GO:0008033:biological_process:tRNA processing
Locus_18659.0|BlastHit|gi|20138031|sp|Q9NPF5.1|DMAP1_HUMAN	3699	GO:0005737:cellular_component:cytoplasm	GO:0035267:cellular_component:NuA4 histone acetyltransferase complex	GO:0005654:cellular_component:nucleoplasm	GO:0005634:cellular_component:nucleus	GO:0005657:cellular_component:replication fork	GO:0003682:molecular_function:chromatin binding	GO:0001103:molecular_function:RNA polymerase II repressing transcription factor binding	GO:0003714:molecular_function:transcription corepressor activity	GO:0006325:biological_process:chromatin organization	GO:0006338:biological_process:chromatin remodeling	GO:0006306:biological_process:DNA methylation	GO:0006281:biological_process:DNA repair	GO:0043968:biological_process:histone H2A acetylation	GO:0043967:biological_process:histone H4 acetylation	GO:0000122:biological_process:negative regulation of transcription from RNA polymerase II promoter	GO:0045892:biological_process:negative regulation of transcription, DNA-templated	GO:0042993:biological_process:positive regulation of transcription factor import into nucleus	GO:0040008:biological_process:regulation of growth	GO:0006351:biological_process:transcription, DNA-templated
Locus_18676.0|BlastHit|gi|464524|sp|Q05974.1|RAB1A_LYMST	3705	GO:0005783:cellular_component:endoplasmic reticulum	GO:0005794:cellular_component:Golgi apparatus	GO:0005525:molecular_function:GTP binding	GO:0015031:biological_process:protein transport	GO:0007264:biological_process:small GTPase mediated signal transduction	GO:0016192:biological_process:vesicle-mediated transport
Locus_18676.0|BlastHit|gi|464524|sp|Q05974.1|RAB1A_LYMST	3706	GO:0005783:cellular_component:endoplasmic reticulum	GO:0005794:cellular_component:Golgi apparatus	GO:0005525:molecular_function:GTP binding	GO:0015031:biological_process:protein transport	GO:0007264:biological_process:small GTPase mediated signal transduction	GO:0016192:biological_process:vesicle-mediated transport
Locus_18761.0|BlastHit|gi|205777157|sp|Q19673.5|TYR3_CAEEL	3734	GO:0046872:molecular_function:metal ion binding	GO:0004497:molecular_function:monooxygenase activity
Locus_18770.0|BlastHit|gi|81884505|sp|Q6AY04.1|CB047_RAT	3738	GO:0005739:cellular_component:mitochondrion
Locus_18779.0|BlastHit|gi|5902701|sp|O60232.1|SSA27_HUMAN	3744	GO:0007067:biological_process:mitotic nuclear division
Locus_18953.0|BlastHit|gi|75057666|sp|Q58DA6.1|S35A2_BOVIN	3813	GO:0000139:cellular_component:Golgi membrane	GO:0016021:cellular_component:integral component of membrane	GO:0005338:molecular_function:nucleotide-sugar transmembrane transporter activity	GO:0005351:molecular_function:sugar:proton symporter activity	GO:0015780:biological_process:nucleotide-sugar transport
Locus_19294.1|BlastHit|gi|115881|sp|P04069.1|CBPB_ASTFL	3921	GO:0005576:cellular_component:extracellular region	GO:0004181:molecular_function:metallocarboxypeptidase activity	GO:0008270:molecular_function:zinc ion binding
Locus_19498.0|BlastHit|gi|52783203|sp|Q8BH04.1|PPCKM_MOUSE	4006	GO:0070062:cellular_component:extracellular vesicular exosome	GO:0005739:cellular_component:mitochondrion	GO:0005525:molecular_function:GTP binding	GO:0046872:molecular_function:metal ion binding	GO:0004613:molecular_function:phosphoenolpyruvate carboxykinase (GTP) activity	GO:0071333:biological_process:cellular response to glucose stimulus	GO:0006094:biological_process:gluconeogenesis	GO:0006116:biological_process:NADH oxidation	GO:0006107:biological_process:oxaloacetate metabolic process	GO:0032024:biological_process:positive regulation of insulin secretion	GO:0006090:biological_process:pyruvate metabolic process	GO:0051384:biological_process:response to glucocorticoid
Locus_19550.0|BlastHit|gi|115502564|sp|Q3SZ19.1|PSMD9_BOVIN	4025	GO:0005634:cellular_component:nucleus	GO:0043425:molecular_function:bHLH transcription factor binding	GO:0008022:molecular_function:protein C-terminus binding	GO:0003713:molecular_function:transcription coactivator activity	GO:0046676:biological_process:negative regulation of insulin secretion	GO:0032024:biological_process:positive regulation of insulin secretion	GO:0045944:biological_process:positive regulation of transcription from RNA polymerase II promoter	GO:0045893:biological_process:positive regulation of transcription, DNA-templated	GO:0070682:biological_process:proteasome regulatory particle assembly	GO:0097050:biological_process:type B pancreatic cell apoptotic process
Locus_19554.0|BlastHit|gi|32363402|sp|Q9DCJ5.3|NDUA8_MOUSE	4031	GO:0005743:cellular_component:mitochondrial inner membrane	GO:0005758:cellular_component:mitochondrial intermembrane space	GO:0005747:cellular_component:mitochondrial respiratory chain complex I	GO:0005739:cellular_component:mitochondrion	GO:0032403:molecular_function:protein complex binding	GO:0055114:biological_process:oxidation-reduction process
Locus_19555.0|BlastHit|gi|205371761|sp|P23588.2|IF4B_HUMAN	4032	GO:0005829:cellular_component:cytosol	GO:0016281:cellular_component:eukaryotic translation initiation factor 4F complex	GO:0000166:molecular_function:nucleotide binding	GO:0044822:molecular_function:poly(A) RNA binding	GO:0003723:molecular_function:RNA binding	GO:0003743:molecular_function:translation initiation factor activity	GO:0044267:biological_process:cellular protein metabolic process	GO:0010467:biological_process:gene expression	GO:0008286:biological_process:insulin receptor signaling pathway	GO:0016071:biological_process:mRNA metabolic process	GO:0000288:biological_process:nuclear-transcribed mRNA catabolic process, deadenylation-dependent decay	GO:0000289:biological_process:nuclear-transcribed mRNA poly(A) tail shortening	GO:0006446:biological_process:regulation of translational initiation	GO:0016070:biological_process:RNA metabolic process	GO:0006412:biological_process:translation	GO:0006413:biological_process:translational initiation
Locus_19564.0|BlastHit|gi|1168274|sp|P45883.2|ACBP_RANRI	4035	GO:0005783:cellular_component:endoplasmic reticulum	GO:0005794:cellular_component:Golgi apparatus	GO:0000062:molecular_function:fatty-acyl-CoA binding	GO:0008289:molecular_function:lipid binding	GO:0006810:biological_process:transport
Locus_19576.0|BlastHit|gi|130353|sp|P15259.3|PGAM2_HUMAN	4037	GO:0005829:cellular_component:cytosol	GO:0070062:cellular_component:extracellular vesicular exosome	GO:0005634:cellular_component:nucleus	GO:0046538:molecular_function:2,3-bisphosphoglycerate-dependent phosphoglycerate mutase activity	GO:0004083:molecular_function:bisphosphoglycerate 2-phosphatase activity	GO:0004082:molecular_function:bisphosphoglycerate mutase activity	GO:0048037:molecular_function:cofactor binding	GO:0004619:molecular_function:phosphoglycerate mutase activity	GO:0005975:biological_process:carbohydrate metabolic process	GO:0006094:biological_process:gluconeogenesis	GO:0006006:biological_process:glucose metabolic process	GO:0006096:biological_process:glycolytic process	GO:0046689:biological_process:response to mercury ion	GO:0044281:biological_process:small molecule metabolic process	GO:0007283:biological_process:spermatogenesis	GO:0006941:biological_process:striated muscle contraction
Locus_19582.0|BlastHit|gi|399021|sp|P25304.2|AGRIN_RAT	4038	GO:0044295:cellular_component:axonal growth cone	GO:0005605:cellular_component:basal lamina	GO:0005604:cellular_component:basement membrane	GO:0030054:cellular_component:cell junction	GO:0005576:cellular_component:extracellular region	GO:0016021:cellular_component:integral component of membrane	GO:0005886:cellular_component:plasma membrane	GO:0005578:cellular_component:proteinaceous extracellular matrix	GO:0045202:cellular_component:synapse	GO:0036122:molecular_function:BMP binding	GO:0005509:molecular_function:calcium ion binding	GO:0035374:molecular_function:chondroitin sulfate binding	GO:0002162:molecular_function:dystroglycan binding	GO:0043395:molecular_function:heparan sulfate proteoglycan binding	GO:0033691:molecular_function:sialic acid binding	GO:0050431:molecular_function:transforming growth factor beta binding	GO:0007528:biological_process:neuromuscular junction development	GO:0051491:biological_process:positive regulation of filopodium assembly	GO:0001934:biological_process:positive regulation of protein phosphorylation	GO:0032321:biological_process:positive regulation of Rho GTPase activity	GO:0045887:biological_process:positive regulation of synaptic growth at neuromuscular junction	GO:0045944:biological_process:positive regulation of transcription from RNA polymerase II promoter	GO:0051290:biological_process:protein heterotetramerization	GO:0043113:biological_process:receptor clustering	GO:1902667:biological_process:regulation of axon guidance	GO:0070507:biological_process:regulation of microtubule cytoskeleton organization	GO:0001932:biological_process:regulation of protein phosphorylation	GO:0007416:biological_process:synapse assembly	GO:0007268:biological_process:synaptic transmission
Locus_19609.0|BlastHit|gi|75061972|sp|Q5RDL2.1|DDX24_PONAB	4061	GO:0016020:cellular_component:membrane	GO:0005730:cellular_component:nucleolus	GO:0005524:molecular_function:ATP binding	GO:0008026:molecular_function:ATP-dependent helicase activity	GO:0044822:molecular_function:poly(A) RNA binding	GO:0003724:molecular_function:RNA helicase activity	GO:0016070:biological_process:RNA metabolic process
Locus_19610.0|BlastHit|gi|82082375|sp|Q5ZL13.1|NUD19_CHICK	4062	GO:0005739:cellular_component:mitochondrion	GO:0005777:cellular_component:peroxisome	GO:0016787:molecular_function:hydrolase activity	GO:0046872:molecular_function:metal ion binding
Locus_19732.0|BlastHit|gi|115143|sp|P20290.1|BTF3_HUMAN	4106	GO:0005737:cellular_component:cytoplasm	GO:0005634:cellular_component:nucleus	GO:0044822:molecular_function:poly(A) RNA binding	GO:0001701:biological_process:in utero embryonic development	GO:0015031:biological_process:protein transport	GO:0006355:biological_process:regulation of transcription, DNA-templated	GO:0006366:biological_process:transcription from RNA polymerase II promoter
Locus_19739.0|BlastHit|gi|47606749|sp|Q05825.3|ATPB_DROME	4109	GO:0009986:cellular_component:cell surface	GO:0070062:cellular_component:extracellular vesicular exosome	GO:0042645:cellular_component:mitochondrial nucleoid	GO:0005753:cellular_component:mitochondrial proton-transporting ATP synthase complex	GO:0005634:cellular_component:nucleus	GO:0005886:cellular_component:plasma membrane	GO:0045261:cellular_component:proton-transporting ATP synthase complex, catalytic core F(1)	GO:0005524:molecular_function:ATP binding	GO:0046933:molecular_function:proton-transporting ATP synthase activity, rotational mechanism	GO:0046961:molecular_function:proton-transporting ATPase activity, rotational mechanism	GO:0001525:biological_process:angiogenesis	GO:0006200:biological_process:ATP catabolic process	GO:0015991:biological_process:ATP hydrolysis coupled proton transport	GO:0015986:biological_process:ATP synthesis coupled proton transport	GO:0006629:biological_process:lipid metabolic process	GO:0006933:biological_process:negative regulation of cell adhesion involved in substrate-bound cell migration	GO:0001649:biological_process:osteoblast differentiation	GO:0051453:biological_process:regulation of intracellular pH
Locus_19759.0|BlastHit|gi|52783213|sp|Q9CY58.2|PAIRB_MOUSE	4117	GO:0070062:cellular_component:extracellular vesicular exosome	GO:0005634:cellular_component:nucleus	GO:0048471:cellular_component:perinuclear region of cytoplasm	GO:0005886:cellular_component:plasma membrane	GO:0003730:molecular_function:mRNA 3'-UTR binding	GO:0042981:biological_process:regulation of apoptotic process
Locus_19861.0|BlastHit|gi|82237247|sp|Q6NVS5.1|DCA13_XENTR	4155	GO:0080008:cellular_component:Cul4-RING E3 ubiquitin ligase complex	GO:0005730:cellular_component:nucleolus	GO:0030529:cellular_component:ribonucleoprotein complex	GO:0016567:biological_process:protein ubiquitination	GO:0006364:biological_process:rRNA processing
Locus_19963.0|BlastHit|gi|83305931|sp|Q8K4K3.2|TRIB2_MOUSE	4199	GO:0005737:cellular_component:cytoplasm	GO:0005856:cellular_component:cytoskeleton	GO:0004860:molecular_function:protein kinase inhibitor activity	GO:0008134:molecular_function:transcription factor binding	GO:0016772:molecular_function:transferase activity, transferring phosphorus-containing groups	GO:0031625:molecular_function:ubiquitin protein ligase binding	GO:0055106:molecular_function:ubiquitin-protein transferase regulator activity	GO:0045599:biological_process:negative regulation of fat cell differentiation	GO:0045081:biological_process:negative regulation of interleukin-10 biosynthetic process	GO:0043433:biological_process:negative regulation of sequence-specific DNA binding transcription factor activity	GO:0032436:biological_process:positive regulation of proteasomal ubiquitin-dependent protein catabolic process	GO:0051443:biological_process:positive regulation of ubiquitin-protein transferase activity	GO:0043405:biological_process:regulation of MAP kinase activity
Locus_19986.0|BlastHit|gi|172045842|sp|P37141.2|GPX3_BOVIN	4210	GO:0004602:molecular_function:glutathione peroxidase activity	GO:0006979:biological_process:response to oxidative stress
Locus_20013.0|BlastHit|gi|81917202|sp|Q9DC22.1|DCAF6_MOUSE	4220	GO:0080008:cellular_component:Cul4-RING E3 ubiquitin ligase complex	GO:0005634:cellular_component:nucleus	GO:0030374:molecular_function:ligand-dependent nuclear receptor transcription coactivator activity	GO:0045944:biological_process:positive regulation of transcription from RNA polymerase II promoter	GO:0016567:biological_process:protein ubiquitination
Locus_20123.0|BlastHit|gi|17380352|sp|P13060.4|EF2_DROME	4257	GO:0005829:cellular_component:cytosol	GO:0005811:cellular_component:lipid particle	GO:0005875:cellular_component:microtubule associated complex	GO:0005525:molecular_function:GTP binding	GO:0003924:molecular_function:GTPase activity	GO:0003746:molecular_function:translation elongation factor activity	GO:0000022:biological_process:mitotic spindle elongation	GO:0007052:biological_process:mitotic spindle organization	GO:0006414:biological_process:translational elongation
Locus_20157.0|BlastHit|gi|11134791|sp|Q9VC49.1|RPAB5_DROME	4274	GO:0005736:cellular_component:DNA-directed RNA polymerase I complex	GO:0005665:cellular_component:DNA-directed RNA polymerase II, core complex	GO:0005666:cellular_component:DNA-directed RNA polymerase III complex	GO:0003677:molecular_function:DNA binding	GO:0003899:molecular_function:DNA-directed RNA polymerase activity	GO:0008270:molecular_function:zinc ion binding	GO:0006360:biological_process:transcription from RNA polymerase I promoter	GO:0006366:biological_process:transcription from RNA polymerase II promoter	GO:0006383:biological_process:transcription from RNA polymerase III promoter
Locus_20246.0|BlastHit|gi|82209800|sp|Q7ZYC4.1|ACBG2_XENLA	4301	GO:0005737:cellular_component:cytoplasm	GO:0005524:molecular_function:ATP binding	GO:0004467:molecular_function:long-chain fatty acid-CoA ligase activity
Locus_20289.0|BlastHit|gi|81875183|sp|Q8BTV1.1|TUSC3_MOUSE	4322	GO:0005789:cellular_component:endoplasmic reticulum membrane	GO:0016021:cellular_component:integral component of membrane	GO:0005886:cellular_component:plasma membrane	GO:0045454:biological_process:cell redox homeostasis	GO:0006810:biological_process:transport
Locus_20326.0|BlastHit|gi|33112671|sp|Q99417.3|MYCBP_HUMAN	4348	GO:0005737:cellular_component:cytoplasm	GO:0005634:cellular_component:nucleus	GO:0003713:molecular_function:transcription coactivator activity	GO:0006355:biological_process:regulation of transcription, DNA-templated	GO:0006351:biological_process:transcription, DNA-templated
Locus_20369.0|BlastHit|gi|74947836|sp|Q9VEJ2.2|NOP14_DROME	4370	GO:0005730:cellular_component:nucleolus	GO:0032040:cellular_component:small-subunit processome	GO:0030515:molecular_function:snoRNA binding	GO:0042274:biological_process:ribosomal small subunit biogenesis	GO:0006364:biological_process:rRNA processing
Locus_20388.0|BlastHit|gi|1709616|sp|P54399.1|PDI_DROME	4380	GO:0060187:cellular_component:cell pole	GO:0005737:cellular_component:cytoplasm	GO:0012505:cellular_component:endomembrane system	GO:0005783:cellular_component:endoplasmic reticulum	GO:0005788:cellular_component:endoplasmic reticulum lumen	GO:0005615:cellular_component:extracellular space	GO:0045169:cellular_component:fusome	GO:0005811:cellular_component:lipid particle	GO:0043025:cellular_component:neuronal cell body	GO:0005635:cellular_component:nuclear envelope	GO:0048471:cellular_component:perinuclear region of cytoplasm	GO:0005791:cellular_component:rough endoplasmic reticulum	GO:0070732:cellular_component:spindle envelope	GO:0003756:molecular_function:protein disulfide isomerase activity	GO:0045454:biological_process:cell redox homeostasis	GO:0019511:biological_process:peptidyl-proline hydroxylation	GO:0006457:biological_process:protein folding	GO:1902175:biological_process:regulation of oxidative stress-induced intrinsic apoptotic signaling pathway	GO:0034976:biological_process:response to endoplasmic reticulum stress
Locus_20557.0|BlastHit|gi|257096650|sp|A7SE07.1|NUBP2_NEMVE	4455	GO:0005737:cellular_component:cytoplasm	GO:0051539:molecular_function:4 iron, 4 sulfur cluster binding	GO:0005524:molecular_function:ATP binding	GO:0046872:molecular_function:metal ion binding	GO:0016226:biological_process:iron-sulfur cluster assembly
Locus_20609.0|BlastHit|gi|82238124|sp|Q6TEN1.1|RAP1B_DANRE	4484	GO:0030054:cellular_component:cell junction	GO:0005829:cellular_component:cytosol	GO:0005886:cellular_component:plasma membrane	GO:0005525:molecular_function:GTP binding	GO:0006184:biological_process:GTP catabolic process	GO:0007264:biological_process:small GTPase mediated signal transduction
Locus_20611.0|BlastHit|gi|13432136|sp|O75844.2|FACE1_HUMAN	4485	GO:0005789:cellular_component:endoplasmic reticulum membrane	GO:0070062:cellular_component:extracellular vesicular exosome	GO:0016021:cellular_component:integral component of membrane	GO:0016020:cellular_component:membrane	GO:0005637:cellular_component:nuclear inner membrane	GO:0046872:molecular_function:metal ion binding	GO:0004222:molecular_function:metalloendopeptidase activity	GO:0008235:molecular_function:metalloexopeptidase activity	GO:0071586:biological_process:CAAX-box protein processing	GO:0006998:biological_process:nuclear envelope organization	GO:0030327:biological_process:prenylated protein catabolic process	GO:0006508:biological_process:proteolysis
Locus_20637.0|BlastHit|gi|166227173|sp|A7MB12.1|UTP15_BOVIN	4501	GO:0005737:cellular_component:cytoplasm	GO:0005730:cellular_component:nucleolus	GO:0044822:molecular_function:poly(A) RNA binding	GO:0006364:biological_process:rRNA processing
Locus_20658.0|BlastHit|gi|12644469|sp|Q94516.2|AT5F1_DROME	4520	GO:0005811:cellular_component:lipid particle	GO:0000276:cellular_component:mitochondrial proton-transporting ATP synthase complex, coupling factor F(o)	GO:0005739:cellular_component:mitochondrion	GO:0015078:molecular_function:hydrogen ion transmembrane transporter activity	GO:0015986:biological_process:ATP synthesis coupled proton transport	GO:0006909:biological_process:phagocytosis
Locus_20658.0|BlastHit|gi|27734441|sp|Q9V3P0.1|PRDX1_DROME	4519	GO:0005829:cellular_component:cytosol	GO:0005875:cellular_component:microtubule associated complex	GO:0008379:molecular_function:thioredoxin peroxidase activity	GO:0007155:biological_process:cell adhesion	GO:0045454:biological_process:cell redox homeostasis	GO:0006974:biological_process:cellular response to DNA damage stimulus	GO:0008340:biological_process:determination of adult lifespan	GO:0007281:biological_process:germ cell development	GO:0008354:biological_process:germ cell migration	GO:0042744:biological_process:hydrogen peroxide catabolic process	GO:0006979:biological_process:response to oxidative stress	GO:0042594:biological_process:response to starvation
Locus_20766.0|BlastHit|gi|17368331|sp|P82968.1|MCPI_MELCP	4581	GO:0004867:molecular_function:serine-type endopeptidase inhibitor activity
Locus_20766.0|BlastHit|gi|17368331|sp|P82968.1|MCPI_MELCP	4582	GO:0004867:molecular_function:serine-type endopeptidase inhibitor activity
Locus_20791.0|BlastHit|gi|74759034|sp|Q7RTN6.1|STRAA_HUMAN	4592	GO:0005737:cellular_component:cytoplasm	GO:0005634:cellular_component:nucleus	GO:0005524:molecular_function:ATP binding	GO:0030295:molecular_function:protein kinase activator activity	GO:0004674:molecular_function:protein serine/threonine kinase activity	GO:0032147:biological_process:activation of protein kinase activity	GO:0007049:biological_process:cell cycle	GO:0006611:biological_process:protein export from nucleus
Locus_20796.0|BlastHit|gi|82085819|sp|Q6EE31.3|TCPQ_CHICK	4596	GO:0005737:cellular_component:cytoplasm	GO:0005815:cellular_component:microtubule organizing center	GO:0005524:molecular_function:ATP binding	GO:0006457:biological_process:protein folding
Locus_20798.0|BlastHit|gi|21759257|sp|Q8VEM8.1|MPCP_MOUSE	4598	GO:0070062:cellular_component:extracellular vesicular exosome	GO:0016021:cellular_component:integral component of membrane	GO:0005743:cellular_component:mitochondrial inner membrane	GO:0005739:cellular_component:mitochondrion	GO:0032403:molecular_function:protein complex binding	GO:0015293:molecular_function:symporter activity
Locus_20824.0|BlastHit|gi|82081893|sp|Q5ZK10.1|NSF1C_CHICK	4605	GO:0005795:cellular_component:Golgi stack	GO:0005634:cellular_component:nucleus	GO:0008289:molecular_function:lipid binding	GO:0007030:biological_process:Golgi organization	GO:0061025:biological_process:membrane fusion
Locus_20905.0|BlastHit|gi|76800653|sp|Q05319.2|STUB_DROME	4656	GO:0016021:cellular_component:integral component of membrane	GO:0005886:cellular_component:plasma membrane	GO:0004252:molecular_function:serine-type endopeptidase activity	GO:0051017:biological_process:actin filament bundle assembly	GO:0007010:biological_process:cytoskeleton organization	GO:0006508:biological_process:proteolysis	GO:0035220:biological_process:wing disc development
Locus_20940.0|BlastHit|gi|263406173|sp|B0WEV5.1|ASNA_CULQU	4679	GO:0005783:cellular_component:endoplasmic reticulum	GO:0005524:molecular_function:ATP binding	GO:0016887:molecular_function:ATPase activity	GO:0046872:molecular_function:metal ion binding	GO:0045048:biological_process:protein insertion into ER membrane	GO:0006810:biological_process:transport
Locus_20951.0|BlastHit|gi|90101415|sp|Q2L969.1|MTX2_PIG	4684	GO:0005741:cellular_component:mitochondrial outer membrane	GO:0006626:biological_process:protein targeting to mitochondrion
Locus_20952.0|BlastHit|gi|33860128|sp|P25160.5|ARL1_DROME	4685	GO:0005794:cellular_component:Golgi apparatus	GO:0005802:cellular_component:trans-Golgi network	GO:0005525:molecular_function:GTP binding	GO:0019904:molecular_function:protein domain specific binding	GO:0033227:biological_process:dsRNA transport	GO:0090158:biological_process:endoplasmic reticulum membrane organization	GO:0016197:biological_process:endosomal transport	GO:0007030:biological_process:Golgi organization	GO:0007269:biological_process:neurotransmitter secretion	GO:0000042:biological_process:protein targeting to Golgi	GO:0030334:biological_process:regulation of cell migration	GO:0060628:biological_process:regulation of ER to Golgi vesicle-mediated transport	GO:0070861:biological_process:regulation of protein exit from endoplasmic reticulum	GO:0007264:biological_process:small GTPase mediated signal transduction	GO:0048488:biological_process:synaptic vesicle endocytosis
Locus_20976.0|BlastHit|gi|122119463|sp|Q1HPS0.1|MLR_BOMMO	4698	GO:0016459:cellular_component:myosin complex	GO:0005509:molecular_function:calcium ion binding
Locus_21003.0|BlastHit|gi|81175192|sp|P36958.2|RPB9_DROME	4721	GO:0005665:cellular_component:DNA-directed RNA polymerase II, core complex	GO:0005634:cellular_component:nucleus	GO:0003677:molecular_function:DNA binding	GO:0003899:molecular_function:DNA-directed RNA polymerase activity	GO:0008270:molecular_function:zinc ion binding	GO:0001193:biological_process:maintenance of transcriptional fidelity during DNA-templated transcription elongation from RNA polymerase II promoter	GO:0007095:biological_process:mitotic G2 DNA damage checkpoint	GO:0007067:biological_process:mitotic nuclear division	GO:0022008:biological_process:neurogenesis	GO:0006366:biological_process:transcription from RNA polymerase II promoter	GO:0006367:biological_process:transcription initiation from RNA polymerase II promoter	GO:0006283:biological_process:transcription-coupled nucleotide-excision repair
Locus_21025.0|BlastHit|gi|1706258|sp|P54985.1|PPIA_BLAGE	4733	GO:0005737:cellular_component:cytoplasm	GO:0005829:cellular_component:cytosol	GO:0005875:cellular_component:microtubule associated complex	GO:0005634:cellular_component:nucleus	GO:0042277:molecular_function:peptide binding	GO:0003755:molecular_function:peptidyl-prolyl cis-trans isomerase activity	GO:0048102:biological_process:autophagic cell death	GO:0006457:biological_process:protein folding	GO:0035071:biological_process:salivary gland cell autophagic cell death
Locus_21027.0|BlastHit|gi|68565296|sp|Q9H3L0.2|MMAD_HUMAN	4734	GO:0005829:cellular_component:cytosol	GO:0005739:cellular_component:mitochondrion	GO:0009235:biological_process:cobalamin metabolic process	GO:0044281:biological_process:small molecule metabolic process	GO:0006766:biological_process:vitamin metabolic process	GO:0006767:biological_process:water-soluble vitamin metabolic process
Locus_21034.0|BlastHit|gi|215274240|sp|Q05086.4|UBE3A_HUMAN	4743	GO:0005737:cellular_component:cytoplasm	GO:0005829:cellular_component:cytosol	GO:0005634:cellular_component:nucleus	GO:0000502:cellular_component:proteasome complex	GO:0016874:molecular_function:ligase activity	GO:0003713:molecular_function:transcription coactivator activity	GO:0004842:molecular_function:ubiquitin-protein transferase activity	GO:0030521:biological_process:androgen receptor signaling pathway	GO:0007420:biological_process:brain development	GO:0001541:biological_process:ovarian follicle development	GO:0014068:biological_process:positive regulation of phosphatidylinositol 3-kinase signaling	GO:0045944:biological_process:positive regulation of transcription from RNA polymerase II promoter	GO:0060736:biological_process:prostate gland growth	GO:0051865:biological_process:protein autoubiquitination	GO:0070936:biological_process:protein K48-linked ubiquitination	GO:0042787:biological_process:protein ubiquitination involved in ubiquitin-dependent protein catabolic process	GO:0006508:biological_process:proteolysis	GO:0035037:biological_process:sperm entry	GO:0006511:biological_process:ubiquitin-dependent protein catabolic process	GO:0016032:biological_process:viral process
Locus_21038.0|BlastHit|gi|62899895|sp|Q9TT99.1|ATOX1_CANFA	4746	GO:0016531:molecular_function:copper chaperone activity	GO:0006878:biological_process:cellular copper ion homeostasis	GO:0006825:biological_process:copper ion transport
Locus_21047.0|BlastHit|gi|122132362|sp|Q08DT6.1|RM47_BOVIN	4747	GO:0005761:cellular_component:mitochondrial ribosome	GO:0005739:cellular_component:mitochondrion	GO:0003735:molecular_function:structural constituent of ribosome	GO:0006412:biological_process:translation
Locus_21064.0|BlastHit|gi|18202123|sp|O70378.1|CX4NB_MOUSE	4759	GO:0005737:cellular_component:cytoplasm	GO:0072546:cellular_component:ER membrane protein complex	GO:0005739:cellular_component:mitochondrion
Locus_21094.0|BlastHit|gi|1705999|sp|P53619.1|COPD_BOVIN	4771	GO:0030131:cellular_component:clathrin adaptor complex	GO:0030126:cellular_component:COPI vesicle coat	GO:0005737:cellular_component:cytoplasm	GO:0005829:cellular_component:cytosol	GO:0005783:cellular_component:endoplasmic reticulum	GO:0005794:cellular_component:Golgi apparatus	GO:0043231:cellular_component:intracellular membrane-bounded organelle	GO:0016020:cellular_component:membrane	GO:0044822:molecular_function:poly(A) RNA binding	GO:0008344:biological_process:adult locomotory behavior	GO:0021691:biological_process:cerebellar Purkinje cell layer maturation	GO:0048205:biological_process:COPI coating of Golgi vesicle	GO:0006886:biological_process:intracellular protein transport	GO:0061024:biological_process:membrane organization	GO:0043473:biological_process:pigmentation	GO:0006890:biological_process:retrograde vesicle-mediated transport, Golgi to ER
Locus_21106.0|BlastHit|gi|190360167|sp|A1L1L2.1|TM214_RAT	4778	GO:0005881:cellular_component:cytoplasmic microtubule	GO:0005789:cellular_component:endoplasmic reticulum membrane	GO:0016021:cellular_component:integral component of membrane	GO:0006915:biological_process:apoptotic process
Locus_21212.0|BlastHit|gi|121928|sp|P15870.1|H1D_STRPU	4844	GO:0000786:cellular_component:nucleosome	GO:0005634:cellular_component:nucleus	GO:0003677:molecular_function:DNA binding	GO:0006334:biological_process:nucleosome assembly
Locus_21226.1|BlastHit|gi|341942237|sp|P57716.3|NICA_MOUSE	4855	GO:0005783:cellular_component:endoplasmic reticulum	GO:0070062:cellular_component:extracellular vesicular exosome	GO:0005794:cellular_component:Golgi apparatus	GO:0005887:cellular_component:integral component of plasma membrane	GO:0005765:cellular_component:lysosomal membrane	GO:0042470:cellular_component:melanosome	GO:0016020:cellular_component:membrane	GO:0005886:cellular_component:plasma membrane	GO:0004175:molecular_function:endopeptidase activity	GO:0050435:biological_process:beta-amyloid metabolic process	GO:0050673:biological_process:epithelial cell proliferation	GO:0006509:biological_process:membrane protein ectodomain proteolysis	GO:0002262:biological_process:myeloid cell homeostasis	GO:0007219:biological_process:Notch signaling pathway	GO:0043085:biological_process:positive regulation of catalytic activity	GO:0016485:biological_process:protein processing	GO:0042098:biological_process:T cell proliferation
Locus_21234.0|BlastHit|gi|729072|sp|P80363.1|CCB23_ORCLI	4856	GO:0005509:molecular_function:calcium ion binding
Locus_21242.0|BlastHit|gi|117423|sp|P80029.1|CRC1_HOMGA	4862	GO:0005615:cellular_component:extracellular space	GO:0031409:molecular_function:pigment binding	GO:0036094:molecular_function:small molecule binding	GO:0006810:biological_process:transport
Locus_21291.0|BlastHit|gi|76800653|sp|Q05319.2|STUB_DROME	4892	GO:0016021:cellular_component:integral component of membrane	GO:0005886:cellular_component:plasma membrane	GO:0004252:molecular_function:serine-type endopeptidase activity	GO:0051017:biological_process:actin filament bundle assembly	GO:0007010:biological_process:cytoskeleton organization	GO:0006508:biological_process:proteolysis	GO:0035220:biological_process:wing disc development
Locus_21307.0|BlastHit|gi|82183924|sp|Q6GLV4.1|UBX1B_XENLA	4914	GO:0005737:cellular_component:cytoplasm	GO:0071796:molecular_function:K6-linked polyubiquitin binding	GO:0032435:biological_process:negative regulation of proteasomal ubiquitin-dependent protein catabolic process	GO:0031397:biological_process:negative regulation of protein ubiquitination
Locus_21403.0|BlastHit|gi|18202945|sp|Q9H4M9.2|EHD1_HUMAN	4954	GO:0031901:cellular_component:early endosome membrane	GO:0030139:cellular_component:endocytic vesicle	GO:0010008:cellular_component:endosome membrane	GO:0070062:cellular_component:extracellular vesicular exosome	GO:0005811:cellular_component:lipid particle	GO:0048471:cellular_component:perinuclear region of cytoplasm	GO:0005886:cellular_component:plasma membrane	GO:0031095:cellular_component:platelet dense tubular network membrane	GO:0055038:cellular_component:recycling endosome membrane	GO:0005524:molecular_function:ATP binding	GO:0005509:molecular_function:calcium ion binding	GO:0005525:molecular_function:GTP binding	GO:0003924:molecular_function:GTPase activity	GO:1990090:biological_process:cellular response to nerve growth factor stimulus	GO:0042632:biological_process:cholesterol homeostasis	GO:0032456:biological_process:endocytic recycling	GO:0006897:biological_process:endocytosis	GO:0006886:biological_process:intracellular protein transport	GO:0034383:biological_process:low-density lipoprotein particle clearance	GO:0031175:biological_process:neuron projection development	GO:0010886:biological_process:positive regulation of cholesterol storage	GO:2001137:biological_process:positive regulation of endocytic recycling	GO:1901741:biological_process:positive regulation of myoblast fusion	GO:0051260:biological_process:protein homooligomerization
Locus_21403.0|BlastHit|gi|18202945|sp|Q9H4M9.2|EHD1_HUMAN	4956	GO:0031901:cellular_component:early endosome membrane	GO:0030139:cellular_component:endocytic vesicle	GO:0010008:cellular_component:endosome membrane	GO:0070062:cellular_component:extracellular vesicular exosome	GO:0005811:cellular_component:lipid particle	GO:0048471:cellular_component:perinuclear region of cytoplasm	GO:0005886:cellular_component:plasma membrane	GO:0031095:cellular_component:platelet dense tubular network membrane	GO:0055038:cellular_component:recycling endosome membrane	GO:0005524:molecular_function:ATP binding	GO:0005509:molecular_function:calcium ion binding	GO:0005525:molecular_function:GTP binding	GO:0003924:molecular_function:GTPase activity	GO:1990090:biological_process:cellular response to nerve growth factor stimulus	GO:0042632:biological_process:cholesterol homeostasis	GO:0032456:biological_process:endocytic recycling	GO:0006897:biological_process:endocytosis	GO:0006886:biological_process:intracellular protein transport	GO:0034383:biological_process:low-density lipoprotein particle clearance	GO:0031175:biological_process:neuron projection development	GO:0010886:biological_process:positive regulation of cholesterol storage	GO:2001137:biological_process:positive regulation of endocytic recycling	GO:1901741:biological_process:positive regulation of myoblast fusion	GO:0051260:biological_process:protein homooligomerization
Locus_21410.0|BlastHit|gi|6685545|sp|O75600.1|KBL_HUMAN	4959	GO:0005739:cellular_component:mitochondrion	GO:0005634:cellular_component:nucleus	GO:0008890:molecular_function:glycine C-acetyltransferase activity	GO:0030170:molecular_function:pyridoxal phosphate binding	GO:0009058:biological_process:biosynthetic process	GO:0006520:biological_process:cellular amino acid metabolic process	GO:0019518:biological_process:L-threonine catabolic process to glycine
Locus_21416.0|BlastHit|gi|118574370|sp|Q0VCR6.1|TMM68_BOVIN	4964	GO:0016021:cellular_component:integral component of membrane	GO:0016746:molecular_function:transferase activity, transferring acyl groups
Locus_21418.0|BlastHit|gi|18203660|sp|Q9Z2A0.2|PDPK1_MOUSE	4970	GO:0005737:cellular_component:cytoplasm	GO:0016023:cellular_component:cytoplasmic membrane-bounded vesicle	GO:0005829:cellular_component:cytosol	GO:0005925:cellular_component:focal adhesion	GO:0097481:cellular_component:neuronal postsynaptic density	GO:0005634:cellular_component:nucleus	GO:0005886:cellular_component:plasma membrane	GO:0004676:molecular_function:3-phosphoinositide-dependent protein kinase activity	GO:0005524:molecular_function:ATP binding	GO:0016004:molecular_function:phospholipase activator activity	GO:0032148:biological_process:activation of protein kinase B activity	GO:0019722:biological_process:calcium-mediated signaling	GO:0016477:biological_process:cell migration	GO:0071364:biological_process:cellular response to epidermal growth factor stimulus	GO:0032869:biological_process:cellular response to insulin stimulus	GO:0007173:biological_process:epidermal growth factor receptor signaling pathway	GO:0097191:biological_process:extrinsic apoptotic signaling pathway	GO:0048041:biological_process:focal adhesion assembly	GO:0006972:biological_process:hyperosmotic response	GO:0010667:biological_process:negative regulation of cardiac muscle cell apoptotic process	GO:0006469:biological_process:negative regulation of protein kinase activity	GO:0034122:biological_process:negative regulation of toll-like receptor signaling pathway	GO:0030512:biological_process:negative regulation of transforming growth factor beta receptor signaling pathway	GO:0018107:biological_process:peptidyl-threonine phosphorylation	GO:0090004:biological_process:positive regulation of establishment of protein localization to plasma membrane	GO:0010518:biological_process:positive regulation of phospholipase activity	GO:0051281:biological_process:positive regulation of release of sequestered calcium ion into cytosol	GO:0010594:biological_process:regulation of endothelial cell migration	GO:0043122:biological_process:regulation of I-kappaB kinase/NF-kappaB signaling	GO:0043304:biological_process:regulation of mast cell degranulation	GO:0006355:biological_process:regulation of transcription, DNA-templated	GO:0007165:biological_process:signal transduction	GO:0006351:biological_process:transcription, DNA-templated	GO:0003323:biological_process:type B pancreatic cell development
Locus_21421.0|BlastHit|gi|74732856|sp|Q9BRA2.1|TXD17_HUMAN	4972	GO:0005829:cellular_component:cytosol	GO:0070062:cellular_component:extracellular vesicular exosome	GO:0009055:molecular_function:electron carrier activity	GO:0004601:molecular_function:peroxidase activity	GO:0047134:molecular_function:protein-disulfide reductase activity	GO:0055114:biological_process:oxidation-reduction process	GO:0033209:biological_process:tumor necrosis factor-mediated signaling pathway
Locus_21423.0|BlastHit|gi|205428140|sp|B2KI79.1|DOPP1_RHIFE	4974	GO:0005789:cellular_component:endoplasmic reticulum membrane	GO:0016021:cellular_component:integral component of membrane	GO:0047874:molecular_function:dolichyldiphosphatase activity	GO:0006486:biological_process:protein glycosylation
Locus_21468.0|BlastHit|gi|82202300|sp|Q6P026.1|BAF_DANRE	5009	GO:0005758:cellular_component:mitochondrial intermembrane space	GO:0016531:molecular_function:copper chaperone activity	GO:0006825:biological_process:copper ion transport
Locus_21468.0|BlastHit|gi|82202300|sp|Q6P026.1|BAF_DANRE	5009	GO:0005794:cellular_component:Golgi apparatus	GO:0016021:cellular_component:integral component of membrane	GO:0005886:cellular_component:plasma membrane	GO:0030154:biological_process:cell differentiation
Locus_21468.0|BlastHit|gi|82202300|sp|Q6P026.1|BAF_DANRE	5009	GO:0016592:cellular_component:mediator complex	GO:0001104:molecular_function:RNA polymerase II transcription cofactor activity	GO:0006366:biological_process:transcription from RNA polymerase II promoter
Locus_21468.0|BlastHit|gi|82202300|sp|Q6P026.1|BAF_DANRE	5009	GO:0005694:cellular_component:chromosome	GO:0005634:cellular_component:nucleus	GO:0003677:molecular_function:DNA binding
Locus_21470.0|BlastHit|gi|31076777|sp|Q9VKV5.1|LIN1_DROME	5011	GO:0005634:cellular_component:nucleus	GO:0022416:biological_process:chaeta development	GO:0048749:biological_process:compound eye development	GO:0006909:biological_process:phagocytosis	GO:0045742:biological_process:positive regulation of epidermal growth factor receptor signaling pathway	GO:0090303:biological_process:positive regulation of wound healing	GO:0035220:biological_process:wing disc development	GO:0042060:biological_process:wound healing
Locus_21476.0|BlastHit|gi|34921426|sp|O96790.2|DPGN_DIPMA	5018	GO:0005576:cellular_component:extracellular region	GO:0004867:molecular_function:serine-type endopeptidase inhibitor activity	GO:0050819:biological_process:negative regulation of coagulation	GO:0010951:biological_process:negative regulation of endopeptidase activity
Locus_21507.0|BlastHit|gi|136050|sp|P15159.1|TNNC_TACTR	5030	GO:0005509:molecular_function:calcium ion binding
Locus_21521.0|BlastHit|gi|82179561|sp|Q5M9B7.1|OSACB_XENLA	5039	GO:0016021:cellular_component:integral component of membrane	GO:0008250:cellular_component:oligosaccharyltransferase complex
Locus_21562.0|BlastHit|gi|75041144|sp|Q5R5R4.1|RUFY2_PONAB	5067	GO:0005634:cellular_component:nucleus	GO:0046872:molecular_function:metal ion binding
Locus_21573.0|BlastHit|gi|74762761|sp|Q9NZC4.1|EHF_HUMAN	5074	GO:0005634:cellular_component:nucleus	GO:0003677:molecular_function:DNA binding	GO:0000978:molecular_function:RNA polymerase II core promoter proximal region sequence-specific DNA binding	GO:0001077:molecular_function:RNA polymerase II core promoter proximal region sequence-specific DNA binding transcription factor activity involved in positive regulation of transcription	GO:0000981:molecular_function:sequence-specific DNA binding RNA polymerase II transcription factor activity	GO:0003700:molecular_function:sequence-specific DNA binding transcription factor activity	GO:0008283:biological_process:cell proliferation	GO:0030855:biological_process:epithelial cell differentiation	GO:0007275:biological_process:multicellular organismal development	GO:0045944:biological_process:positive regulation of transcription from RNA polymerase II promoter	GO:0045893:biological_process:positive regulation of transcription, DNA-templated	GO:0006357:biological_process:regulation of transcription from RNA polymerase II promoter	GO:0006366:biological_process:transcription from RNA polymerase II promoter
Locus_21595.0|BlastHit|gi|29337191|sp|Q24297.2|RUXF_DROME	5091	GO:0071013:cellular_component:catalytic step 2 spliceosome	GO:0071011:cellular_component:precatalytic spliceosome	GO:0030532:cellular_component:small nuclear ribonucleoprotein complex	GO:0005681:cellular_component:spliceosomal complex	GO:0003723:molecular_function:RNA binding	GO:0007052:biological_process:mitotic spindle organization	GO:0000398:biological_process:mRNA splicing, via spliceosome
Locus_21624.0|BlastHit|gi|21264423|sp|P21266.3|GSTM3_HUMAN	5125	GO:0005737:cellular_component:cytoplasm	GO:0005829:cellular_component:cytosol	GO:0070062:cellular_component:extracellular vesicular exosome	GO:0005634:cellular_component:nucleus	GO:0035686:cellular_component:sperm fibrous sheath	GO:0019899:molecular_function:enzyme binding	GO:0043295:molecular_function:glutathione binding	GO:0004364:molecular_function:glutathione transferase activity	GO:0042802:molecular_function:identical protein binding	GO:0042803:molecular_function:protein homodimerization activity	GO:0070458:biological_process:cellular detoxification of nitrogen compound	GO:0008065:biological_process:establishment of blood-nerve barrier	GO:1901687:biological_process:glutathione derivative biosynthetic process	GO:0006749:biological_process:glutathione metabolic process	GO:0018916:biological_process:nitrobenzene metabolic process	GO:0043627:biological_process:response to estrogen	GO:0044281:biological_process:small molecule metabolic process	GO:0042178:biological_process:xenobiotic catabolic process	GO:0006805:biological_process:xenobiotic metabolic process
Locus_21690.0|BlastHit|gi|347602416|sp|D2XV59.1|GTPB1_RAT	5174	GO:0000177:cellular_component:cytoplasmic exosome (RNase complex)	GO:0005829:cellular_component:cytosol	GO:0016020:cellular_component:membrane	GO:0005525:molecular_function:GTP binding	GO:0003924:molecular_function:GTPase activity	GO:0044822:molecular_function:poly(A) RNA binding	GO:0006184:biological_process:GTP catabolic process	GO:0061014:biological_process:positive regulation of mRNA catabolic process
Locus_21706.0|BlastHit|gi|205786023|sp|Q28ID3.2|GLRX3_XENTR	5179	GO:0005938:cellular_component:cell cortex	GO:0009055:molecular_function:electron carrier activity	GO:0051536:molecular_function:iron-sulfur cluster binding	GO:0046872:molecular_function:metal ion binding	GO:0015035:molecular_function:protein disulfide oxidoreductase activity	GO:0045454:biological_process:cell redox homeostasis
Locus_21707.0|BlastHit|gi|47605558|sp|Q9PTY0.1|ATPB_CYPCA	5180	GO:0005743:cellular_component:mitochondrial inner membrane	GO:0045261:cellular_component:proton-transporting ATP synthase complex, catalytic core F(1)	GO:0005524:molecular_function:ATP binding	GO:0046933:molecular_function:proton-transporting ATP synthase activity, rotational mechanism	GO:0015991:biological_process:ATP hydrolysis coupled proton transport	GO:0015986:biological_process:ATP synthesis coupled proton transport
Locus_21748.0|BlastHit|gi|38258418|sp|Q15637.4|SF01_HUMAN	5209	GO:0005634:cellular_component:nucleus	GO:0005840:cellular_component:ribosome	GO:0005681:cellular_component:spliceosomal complex	GO:0044822:molecular_function:poly(A) RNA binding	GO:0003723:molecular_function:RNA binding	GO:0003714:molecular_function:transcription corepressor activity	GO:0008270:molecular_function:zinc ion binding	GO:0033327:biological_process:Leydig cell differentiation	GO:0030238:biological_process:male sex determination	GO:0000389:biological_process:mRNA 3'-splice site recognition	GO:0000398:biological_process:mRNA splicing, via spliceosome	GO:1903507:biological_process:negative regulation of nucleic acid-templated transcription	GO:0048662:biological_process:negative regulation of smooth muscle cell proliferation	GO:0050810:biological_process:regulation of steroid biosynthetic process	GO:0006355:biological_process:regulation of transcription, DNA-templated	GO:0000245:biological_process:spliceosomal complex assembly	GO:0006351:biological_process:transcription, DNA-templated
Locus_21756.0|BlastHit|gi|60390658|sp|Q9R1S4.1|XBP1_RAT	5218	GO:0005737:cellular_component:cytoplasm	GO:0005634:cellular_component:nucleus	GO:0003677:molecular_function:DNA binding	GO:0001158:molecular_function:enhancer sequence-specific DNA binding	GO:0046982:molecular_function:protein heterodimerization activity	GO:0000977:molecular_function:RNA polymerase II regulatory region sequence-specific DNA binding	GO:0043565:molecular_function:sequence-specific DNA binding	GO:0000981:molecular_function:sequence-specific DNA binding RNA polymerase II transcription factor activity	GO:0003700:molecular_function:sequence-specific DNA binding transcription factor activity	GO:0060612:biological_process:adipose tissue development	GO:0071236:biological_process:cellular response to antibiotic	GO:0071353:biological_process:cellular response to interleukin-4	GO:0071222:biological_process:cellular response to lipopolysaccharide	GO:0071375:biological_process:cellular response to peptide hormone stimulus	GO:0030968:biological_process:endoplasmic reticulum unfolded protein response	GO:0060691:biological_process:epithelial cell maturation involved in salivary gland development	GO:0031017:biological_process:exocrine pancreas development	GO:0042593:biological_process:glucose homeostasis	GO:0001889:biological_process:liver development	GO:0043066:biological_process:negative regulation of apoptotic process	GO:0045579:biological_process:positive regulation of B cell differentiation	GO:1900103:biological_process:positive regulation of endoplasmic reticulum unfolded protein response	GO:0045600:biological_process:positive regulation of fat cell differentiation	GO:2000347:biological_process:positive regulation of hepatocyte proliferation	GO:0002639:biological_process:positive regulation of immunoglobulin production	GO:1903489:biological_process:positive regulation of lactation	GO:0045348:biological_process:positive regulation of MHC class II biosynthetic process	GO:1900100:biological_process:positive regulation of plasma cell differentiation	GO:1901800:biological_process:positive regulation of proteasomal protein catabolic process	GO:0045582:biological_process:positive regulation of T cell differentiation	GO:0045944:biological_process:positive regulation of transcription from RNA polymerase II promoter	GO:0006990:biological_process:positive regulation of transcription from RNA polymerase II promoter involved in unfolded protein response	GO:0006355:biological_process:regulation of transcription, DNA-templated	GO:0042493:biological_process:response to drug	GO:0051602:biological_process:response to electrical stimulus	GO:0060096:biological_process:serotonin secretion, neurotransmission
Locus_21777.0|BlastHit|gi|122146150|sp|Q3SZ22.1|RM46_BOVIN	5226	GO:0005739:cellular_component:mitochondrion	GO:0005840:cellular_component:ribosome	GO:0016787:molecular_function:hydrolase activity
Locus_21781.0|BlastHit|gi|2499773|sp|Q26486.1|FKBP4_SPOFR	5227	GO:0005730:cellular_component:nucleolus	GO:0003677:molecular_function:DNA binding	GO:0005528:molecular_function:FK506 binding	GO:0003755:molecular_function:peptidyl-prolyl cis-trans isomerase activity	GO:0000412:biological_process:histone peptidyl-prolyl isomerization	GO:0006457:biological_process:protein folding
Locus_21801.0|BlastHit|gi|3334458|sp|P53348.2|BTG1_BOVIN	5239	GO:0005737:cellular_component:cytoplasm	GO:0005634:cellular_component:nucleus	GO:0019899:molecular_function:enzyme binding	GO:0008285:biological_process:negative regulation of cell proliferation	GO:0045766:biological_process:positive regulation of angiogenesis	GO:0045603:biological_process:positive regulation of endothelial cell differentiation	GO:2000271:biological_process:positive regulation of fibroblast apoptotic process	GO:0045663:biological_process:positive regulation of myoblast differentiation	GO:0006479:biological_process:protein methylation	GO:0006979:biological_process:response to oxidative stress	GO:0043434:biological_process:response to peptide hormone	GO:0007286:biological_process:spermatid development	GO:0007283:biological_process:spermatogenesis
Locus_21815.0|BlastHit|gi|74967036|sp|Q24423.1|NOC_DROME	5251	GO:0005634:cellular_component:nucleus	GO:0003677:molecular_function:DNA binding	GO:0046872:molecular_function:metal ion binding	GO:0007420:biological_process:brain development	GO:0008283:biological_process:cell proliferation	GO:0001752:biological_process:compound eye photoreceptor fate commitment	GO:0035214:biological_process:eye-antennal disc development	GO:0002121:biological_process:inter-male aggressive behavior	GO:0035218:biological_process:leg disc development	GO:0010629:biological_process:negative regulation of gene expression	GO:0007219:biological_process:Notch signaling pathway	GO:0008056:biological_process:ocellus development	GO:0007424:biological_process:open tracheal system development	GO:0006357:biological_process:regulation of transcription from RNA polymerase II promoter	GO:0007430:biological_process:terminal branching, open tracheal system	GO:0035220:biological_process:wing disc development
Locus_21849.0|BlastHit|gi|1346652|sp|Q01728.3|NAC1_RAT	5286	GO:0042995:cellular_component:cell projection	GO:0043198:cellular_component:dendritic shaft	GO:0043197:cellular_component:dendritic spine	GO:0016021:cellular_component:integral component of membrane	GO:0014704:cellular_component:intercalated disc	GO:0005874:cellular_component:microtubule	GO:0005739:cellular_component:mitochondrion	GO:0005886:cellular_component:plasma membrane	GO:0042383:cellular_component:sarcolemma	GO:0030315:cellular_component:T-tubule	GO:0030018:cellular_component:Z disc	GO:0005432:molecular_function:calcium:sodium antiporter activity	GO:0046872:molecular_function:metal ion binding	GO:1901660:biological_process:calcium ion export	GO:0070509:biological_process:calcium ion import	GO:0070588:biological_process:calcium ion transmembrane transport	GO:0006816:biological_process:calcium ion transport	GO:0060402:biological_process:calcium ion transport into cytosol	GO:0086064:biological_process:cell communication by electrical coupling involved in cardiac conduction	GO:0006874:biological_process:cellular calcium ion homeostasis	GO:0071320:biological_process:cellular response to cAMP	GO:0071456:biological_process:cellular response to hypoxia	GO:0034614:biological_process:cellular response to reactive oxygen species	GO:0007204:biological_process:positive regulation of cytosolic calcium ion concentration	GO:0010763:biological_process:positive regulation of fibroblast migration	GO:0051924:biological_process:regulation of calcium ion transport	GO:0010881:biological_process:regulation of cardiac muscle contraction by regulation of the release of sequestered calcium ion	GO:0002028:biological_process:regulation of sodium ion transport	GO:0033198:biological_process:response to ATP	GO:0042493:biological_process:response to drug	GO:0009749:biological_process:response to glucose	GO:0042542:biological_process:response to hydrogen peroxide	GO:0001666:biological_process:response to hypoxia	GO:0035902:biological_process:response to immobilization stress	GO:0007584:biological_process:response to nutrient	GO:0071436:biological_process:sodium ion export
Locus_21859.1|BlastHit|gi|2500907|sp|Q24143.1|HR96_DROME	5291	GO:0005634:cellular_component:nucleus	GO:0004879:molecular_function:ligand-activated sequence-specific DNA binding RNA polymerase II transcription factor activity	GO:0000977:molecular_function:RNA polymerase II regulatory region sequence-specific DNA binding	GO:0003707:molecular_function:steroid hormone receptor activity	GO:0008270:molecular_function:zinc ion binding	GO:0042632:biological_process:cholesterol homeostasis	GO:0030522:biological_process:intracellular receptor signaling pathway	GO:0070873:biological_process:regulation of glycogen metabolic process	GO:0042594:biological_process:response to starvation	GO:0070328:biological_process:triglyceride homeostasis
Locus_21860.0|BlastHit|gi|21759413|sp|Q9CRA8.1|EXOS5_MOUSE	5292	GO:0005737:cellular_component:cytoplasm	GO:0005829:cellular_component:cytosol	GO:0000178:cellular_component:exosome (RNase complex)	GO:0005730:cellular_component:nucleolus	GO:0035327:cellular_component:transcriptionally active chromatin	GO:0000175:molecular_function:3'-5'-exoribonuclease activity	GO:0003723:molecular_function:RNA binding	GO:0051607:biological_process:defense response to virus	GO:0045006:biological_process:DNA deamination	GO:0043928:biological_process:exonucleolytic nuclear-transcribed mRNA catabolic process involved in deadenylation-dependent decay	GO:0010467:biological_process:gene expression	GO:0016071:biological_process:mRNA metabolic process	GO:0000288:biological_process:nuclear-transcribed mRNA catabolic process, deadenylation-dependent decay	GO:0016070:biological_process:RNA metabolic process	GO:0090503:biological_process:RNA phosphodiester bond hydrolysis, exonucleolytic	GO:0006364:biological_process:rRNA processing
Locus_21872.0|BlastHit|gi|215275262|sp|Q5DC69.2|CH10_SCHJA	5303	GO:0005759:cellular_component:mitochondrial matrix	GO:0005524:molecular_function:ATP binding	GO:0006457:biological_process:protein folding
Locus_21940.0|BlastHit|gi|122134262|sp|Q1LZ78.1|NTPCR_BOVIN	5345	GO:0005524:molecular_function:ATP binding	GO:0017111:molecular_function:nucleoside-triphosphatase activity	GO:0098519:molecular_function:nucleotide phosphatase activity, acting on free nucleotides
Locus_22013.0|BlastHit|gi|114389|sp|P25169.1|AT1B1_ARTSF	5376	GO:0005890:cellular_component:sodium:potassium-exchanging ATPase complex	GO:0006813:biological_process:potassium ion transport	GO:0006814:biological_process:sodium ion transport
Locus_22014.0|BlastHit|gi|23821818|sp|O46419.1|LIPT_BOVIN	5377	GO:0005739:cellular_component:mitochondrion	GO:0016746:molecular_function:transferase activity, transferring acyl groups	GO:0009249:biological_process:protein lipoylation
Locus_22026.0|BlastHit|gi|38258901|sp|P13582.3|EAST_DROME	5381	GO:0005576:cellular_component:extracellular region	GO:0008233:molecular_function:peptidase activity	GO:0004252:molecular_function:serine-type endopeptidase activity	GO:0008236:molecular_function:serine-type peptidase activity	GO:0009950:biological_process:dorsal/ventral axis specification	GO:0007311:biological_process:maternal specification of dorsal/ventral axis, oocyte, germ-line encoded	GO:0006508:biological_process:proteolysis	GO:0008063:biological_process:Toll signaling pathway	GO:0031638:biological_process:zymogen activation
Locus_22035.0|BlastHit|gi|1705630|sp|P00787.2|CATB_RAT	5382	GO:0005615:cellular_component:extracellular space	GO:0070062:cellular_component:extracellular vesicular exosome	GO:0005764:cellular_component:lysosome	GO:0042470:cellular_component:melanosome	GO:0005739:cellular_component:mitochondrion	GO:0005730:cellular_component:nucleolus	GO:0048471:cellular_component:perinuclear region of cytoplasm	GO:0004197:molecular_function:cysteine-type endopeptidase activity	GO:0097067:biological_process:cellular response to thyroid hormone stimulus	GO:0030574:biological_process:collagen catabolic process	GO:0046697:biological_process:decidualization	GO:0030855:biological_process:epithelial cell differentiation	GO:0051603:biological_process:proteolysis involved in cellular protein catabolic process	GO:0050790:biological_process:regulation of catalytic activity
Locus_22121.0|BlastHit|gi|82192798|sp|Q503P2.1|NIP7_DANRE	5424	GO:0005730:cellular_component:nucleolus	GO:0003723:molecular_function:RNA binding	GO:0042255:biological_process:ribosome assembly
Locus_22207.0|BlastHit|gi|115502310|sp|Q0MQC7.1|NDUB2_PONPY	5465	GO:0005747:cellular_component:mitochondrial respiratory chain complex I	GO:0055114:biological_process:oxidation-reduction process
Locus_22251.0|BlastHit|gi|71153228|sp|Q8HXM1.1|CSTF2_BOVIN	5483	GO:0071920:cellular_component:cleavage body	GO:0005847:cellular_component:mRNA cleavage and polyadenylation specificity factor complex	GO:0000166:molecular_function:nucleotide binding	GO:0044822:molecular_function:poly(A) RNA binding	GO:0006397:biological_process:mRNA processing
Locus_22260.0|BlastHit|gi|547984|sp|Q05752.2|NDUA7_BOVIN	5490	GO:0005743:cellular_component:mitochondrial inner membrane	GO:0005739:cellular_component:mitochondrion	GO:0070469:cellular_component:respiratory chain	GO:0008137:molecular_function:NADH dehydrogenase (ubiquinone) activity	GO:0042773:biological_process:ATP synthesis coupled electron transport
Locus_22296.0|BlastHit|gi|3121830|sp|Q24572.1|CAF1_DROME	5505	GO:0033186:cellular_component:CAF-1 complex	GO:0035098:cellular_component:ESC/E(Z) complex	GO:0035097:cellular_component:histone methyltransferase complex	GO:0031523:cellular_component:Myb complex	GO:0005634:cellular_component:nucleus	GO:0016581:cellular_component:NuRD complex	GO:0016589:cellular_component:NURF complex	GO:0005700:cellular_component:polytene chromosome	GO:0070822:cellular_component:Sin3-type complex	GO:0005667:cellular_component:transcription factor complex	GO:0035035:molecular_function:histone acetyltransferase binding	GO:0042393:molecular_function:histone binding	GO:0042826:molecular_function:histone deacetylase binding	GO:0042803:molecular_function:protein homodimerization activity	GO:0031497:biological_process:chromatin assembly	GO:0006342:biological_process:chromatin silencing	GO:0048813:biological_process:dendrite morphogenesis	GO:0006281:biological_process:DNA repair	GO:0007307:biological_process:eggshell chorion gene amplification	GO:0016573:biological_process:histone acetylation	GO:0070734:biological_process:histone H3-K27 methylation	GO:0051567:biological_process:histone H3-K9 methylation	GO:0016571:biological_process:histone methylation	GO:0000281:biological_process:mitotic cytokinesis	GO:0007517:biological_process:muscle organ development	GO:0000122:biological_process:negative regulation of transcription from RNA polymerase II promoter	GO:0048666:biological_process:neuron development	GO:0048812:biological_process:neuron projection morphogenesis	GO:0006334:biological_process:nucleosome assembly	GO:0042766:biological_process:nucleosome mobilization	GO:0016584:biological_process:nucleosome positioning	GO:0008284:biological_process:positive regulation of cell proliferation	GO:0007346:biological_process:regulation of mitotic cell cycle	GO:0007379:biological_process:segment specification	GO:0006351:biological_process:transcription, DNA-templated
Locus_22322.0|BlastHit|gi|730031|sp|P40423.1|SQH_DROME	5539	GO:0005912:cellular_component:adherens junction	GO:0016324:cellular_component:apical plasma membrane	GO:0005938:cellular_component:cell cortex	GO:0032154:cellular_component:cleavage furrow	GO:0005737:cellular_component:cytoplasm	GO:0035183:cellular_component:female germline ring canal inner rim	GO:0030496:cellular_component:midbody	GO:0016460:cellular_component:myosin II complex	GO:0005886:cellular_component:plasma membrane	GO:0051233:cellular_component:spindle midzone	GO:0005509:molecular_function:calcium ion binding	GO:0032036:molecular_function:myosin heavy chain binding	GO:0030048:biological_process:actin filament-based movement	GO:0007298:biological_process:border follicle cell migration	GO:0090254:biological_process:cell elongation involved in imaginal disc-derived wing morphogenesis	GO:0019749:biological_process:cytoskeleton-dependent cytoplasmic transport, nurse cell to oocyte	GO:0001736:biological_process:establishment of planar polarity	GO:0060288:biological_process:formation of a compartment boundary	GO:0035317:biological_process:imaginal disc-derived wing hair organization	GO:0000281:biological_process:mitotic cytokinesis	GO:0022008:biological_process:neurogenesis	GO:0035191:biological_process:nuclear axial expansion	GO:0030707:biological_process:ovarian follicle cell development	GO:0007300:biological_process:ovarian nurse cell to oocyte transport	GO:0032956:biological_process:regulation of actin cytoskeleton organization	GO:0035159:biological_process:regulation of tube length, open tracheal system	GO:0035277:biological_process:spiracle morphogenesis, open tracheal system	GO:0042060:biological_process:wound healing
Locus_22338.0|BlastHit|gi|327478539|sp|O14562.2|UBFD1_HUMAN	5548	GO:0044822:molecular_function:poly(A) RNA binding
Locus_22353.0|BlastHit|gi|347662469|sp|D3ZVF4.1|TPPC2_RAT	5556	GO:0005783:cellular_component:endoplasmic reticulum	GO:0005794:cellular_component:Golgi apparatus	GO:0005634:cellular_component:nucleus	GO:0048471:cellular_component:perinuclear region of cytoplasm	GO:0006888:biological_process:ER to Golgi vesicle-mediated transport	GO:0006351:biological_process:transcription, DNA-templated
Locus_22356.0|BlastHit|gi|728798|sp|P41341.1|ACTY_LIMPO	5561	GO:0005737:cellular_component:cytoplasm	GO:0005856:cellular_component:cytoskeleton	GO:0005524:molecular_function:ATP binding
Locus_22367.0|BlastHit|gi|55584008|sp|Q9W1V3.1|FBRL_DROME	5569	GO:0015030:cellular_component:Cajal body	GO:0001651:cellular_component:dense fibrillar component	GO:0005730:cellular_component:nucleolus	GO:0030532:cellular_component:small nuclear ribonucleoprotein complex	GO:0005732:cellular_component:small nucleolar ribonucleoprotein complex	GO:0008168:molecular_function:methyltransferase activity	GO:0003723:molecular_function:RNA binding	GO:0051297:biological_process:centrosome organization	GO:0006396:biological_process:RNA processing	GO:0006364:biological_process:rRNA processing	GO:0008033:biological_process:tRNA processing
Locus_22374.0|BlastHit|gi|6093528|sp|P10776.3|NPAB_LOCMI	5573	GO:0007218:biological_process:neuropeptide signaling pathway
Locus_22385.0|BlastHit|gi|93140520|sp|Q3SZE2.1|PFD1_BOVIN	5579	GO:0005829:cellular_component:cytosol	GO:0016272:cellular_component:prefoldin complex	GO:0030036:biological_process:actin cytoskeleton organization	GO:0042113:biological_process:B cell activation	GO:0021549:biological_process:cerebellum development	GO:0051086:biological_process:chaperone mediated protein folding independent of cofactor	GO:0006457:biological_process:protein folding	GO:0021537:biological_process:telencephalon development
Locus_22403.0|BlastHit|gi|122144044|sp|Q3SZB4.1|ACADM_BOVIN	5586	GO:0005759:cellular_component:mitochondrial matrix	GO:0003995:molecular_function:acyl-CoA dehydrogenase activity	GO:0050660:molecular_function:flavin adenine dinucleotide binding	GO:0070991:molecular_function:medium-chain-acyl-CoA dehydrogenase activity	GO:0055007:biological_process:cardiac muscle cell differentiation	GO:0019254:biological_process:carnitine metabolic process, CoA-linked	GO:0006635:biological_process:fatty acid beta-oxidation	GO:0033539:biological_process:fatty acid beta-oxidation using acyl-CoA dehydrogenase	GO:0005978:biological_process:glycogen biosynthetic process	GO:0001889:biological_process:liver development	GO:0051791:biological_process:medium-chain fatty acid metabolic process	GO:0009791:biological_process:post-embryonic development	GO:0006111:biological_process:regulation of gluconeogenesis	GO:0009409:biological_process:response to cold	GO:0042594:biological_process:response to starvation
Locus_22412.0|BlastHit|gi|1171668|sp|P42325.2|NCAH_DROME	5592	GO:0005509:molecular_function:calcium ion binding
Locus_22413.0|BlastHit|gi|68565951|sp|Q9V3U2.1|NHP2_DROME	5593	GO:0005730:cellular_component:nucleolus	GO:0005732:cellular_component:small nucleolar ribonucleoprotein complex	GO:0030515:molecular_function:snoRNA binding	GO:0031118:biological_process:rRNA pseudouridine synthesis
Locus_22468.0|BlastHit|gi|3914023|sp|O43772.1|MCAT_HUMAN	5629	GO:0016021:cellular_component:integral component of membrane	GO:0005743:cellular_component:mitochondrial inner membrane	GO:0005739:cellular_component:mitochondrion	GO:0006853:biological_process:carnitine shuttle	GO:0044255:biological_process:cellular lipid metabolic process	GO:0044281:biological_process:small molecule metabolic process
Locus_22479.0|BlastHit|gi|38258901|sp|P13582.3|EAST_DROME	5632	GO:0005576:cellular_component:extracellular region	GO:0008233:molecular_function:peptidase activity	GO:0004252:molecular_function:serine-type endopeptidase activity	GO:0008236:molecular_function:serine-type peptidase activity	GO:0009950:biological_process:dorsal/ventral axis specification	GO:0007311:biological_process:maternal specification of dorsal/ventral axis, oocyte, germ-line encoded	GO:0006508:biological_process:proteolysis	GO:0008063:biological_process:Toll signaling pathway	GO:0031638:biological_process:zymogen activation
Locus_22499.0|BlastHit|gi|52783086|sp|Q921Y2.1|IMP3_MOUSE	5643	GO:0005730:cellular_component:nucleolus	GO:0030529:cellular_component:ribonucleoprotein complex	GO:0044822:molecular_function:poly(A) RNA binding	GO:0019843:molecular_function:rRNA binding	GO:0030519:molecular_function:snoRNP binding	GO:0006364:biological_process:rRNA processing
Locus_22501.0|BlastHit|gi|20141793|sp|Q15428.2|SF3A2_HUMAN	5646	GO:0071013:cellular_component:catalytic step 2 spliceosome	GO:0005654:cellular_component:nucleoplasm	GO:0030532:cellular_component:small nuclear ribonucleoprotein complex	GO:0005681:cellular_component:spliceosomal complex	GO:0044822:molecular_function:poly(A) RNA binding	GO:0008270:molecular_function:zinc ion binding	GO:0010467:biological_process:gene expression	GO:0000389:biological_process:mRNA 3'-splice site recognition	GO:0006397:biological_process:mRNA processing	GO:0000398:biological_process:mRNA splicing, via spliceosome	GO:0008380:biological_process:RNA splicing
Locus_22516.0|BlastHit|gi|82180250|sp|Q5XGC5.1|PSMG2_XENTR	5655	GO:0005634:cellular_component:nucleus	GO:0043248:biological_process:proteasome assembly
Locus_22528.1|BlastHit|gi|25008165|sp|Q61335.3|BAP31_MOUSE	5660	GO:0030136:cellular_component:clathrin-coated vesicle	GO:0005789:cellular_component:endoplasmic reticulum membrane	GO:0033116:cellular_component:endoplasmic reticulum-Golgi intermediate compartment membrane	GO:0032580:cellular_component:Golgi cisterna membrane	GO:0000139:cellular_component:Golgi membrane	GO:0005887:cellular_component:integral component of plasma membrane	GO:0005811:cellular_component:lipid particle	GO:0042288:molecular_function:MHC class I protein binding	GO:0032403:molecular_function:protein complex binding	GO:0035584:biological_process:calcium-mediated signaling using intracellular calcium source	GO:0006888:biological_process:ER to Golgi vesicle-mediated transport	GO:0006886:biological_process:intracellular protein transport	GO:0032471:biological_process:negative regulation of endoplasmic reticulum calcium ion concentration	GO:0043280:biological_process:positive regulation of cysteine-type endopeptidase activity involved in apoptotic process	GO:0007204:biological_process:positive regulation of cytosolic calcium ion concentration	GO:2001244:biological_process:positive regulation of intrinsic apoptotic signaling pathway	GO:0051561:biological_process:positive regulation of mitochondrial calcium ion concentration	GO:0070973:biological_process:protein localization to endoplasmic reticulum exit site	GO:0007283:biological_process:spermatogenesis
Locus_22564.0|BlastHit|gi|118373|sp|P27117.1|DCOR_BOVIN	5689	GO:0005737:cellular_component:cytoplasm	GO:0005829:cellular_component:cytosol	GO:0004586:molecular_function:ornithine decarboxylase activity	GO:0042803:molecular_function:protein homodimerization activity	GO:0001822:biological_process:kidney development	GO:0008284:biological_process:positive regulation of cell proliferation	GO:0033387:biological_process:putrescine biosynthetic process from ornithine	GO:0042176:biological_process:regulation of protein catabolic process
Locus_22605.0|BlastHit|gi|730564|sp|P39872.2|RL3_BOVIN	5718	GO:0005730:cellular_component:nucleolus	GO:0005840:cellular_component:ribosome	GO:0003735:molecular_function:structural constituent of ribosome	GO:0006412:biological_process:translation
Locus_22605.0|BlastHit|gi|730564|sp|P39872.2|RL3_BOVIN	5718	GO:0005840:cellular_component:ribosome	GO:0003735:molecular_function:structural constituent of ribosome	GO:0051298:biological_process:centrosome duplication	GO:0051297:biological_process:centrosome organization	GO:0000022:biological_process:mitotic spindle elongation	GO:0007052:biological_process:mitotic spindle organization	GO:0006412:biological_process:translation
Locus_22605.0|BlastHit|gi|730564|sp|P39872.2|RL3_BOVIN	5719	GO:0005730:cellular_component:nucleolus	GO:0005840:cellular_component:ribosome	GO:0003735:molecular_function:structural constituent of ribosome	GO:0006412:biological_process:translation
Locus_22605.0|BlastHit|gi|730564|sp|P39872.2|RL3_BOVIN	5719	GO:0005840:cellular_component:ribosome	GO:0003735:molecular_function:structural constituent of ribosome	GO:0051298:biological_process:centrosome duplication	GO:0051297:biological_process:centrosome organization	GO:0000022:biological_process:mitotic spindle elongation	GO:0007052:biological_process:mitotic spindle organization	GO:0006412:biological_process:translation
Locus_22620.0|BlastHit|gi|110825729|sp|P05661.4|MYSA_DROME	5723	GO:0031672:cellular_component:A band	GO:0016459:cellular_component:myosin complex	GO:0032982:cellular_component:myosin filament	GO:0005703:cellular_component:polytene chromosome puff	GO:0030017:cellular_component:sarcomere	GO:0030898:molecular_function:actin-dependent ATPase activity	GO:0005524:molecular_function:ATP binding	GO:0042623:molecular_function:ATPase activity, coupled	GO:0003774:molecular_function:motor activity	GO:0042803:molecular_function:protein homodimerization activity	GO:0008307:molecular_function:structural constituent of muscle	GO:0007527:biological_process:adult somatic muscle development	GO:0006200:biological_process:ATP catabolic process	GO:0007298:biological_process:border follicle cell migration	GO:0007427:biological_process:epithelial cell migration, open tracheal system	GO:0060361:biological_process:flight	GO:0040011:biological_process:locomotion	GO:0042692:biological_process:muscle cell differentiation	GO:0006936:biological_process:muscle contraction	GO:0007517:biological_process:muscle organ development	GO:0030239:biological_process:myofibril assembly	GO:0031033:biological_process:myosin filament organization	GO:0050821:biological_process:protein stabilization	GO:0045214:biological_process:sarcomere organization	GO:0030241:biological_process:skeletal muscle myosin thick filament assembly
Locus_22620.0|BlastHit|gi|110825729|sp|P05661.4|MYSA_DROME	5727	GO:0031672:cellular_component:A band	GO:0016459:cellular_component:myosin complex	GO:0032982:cellular_component:myosin filament	GO:0005703:cellular_component:polytene chromosome puff	GO:0030017:cellular_component:sarcomere	GO:0030898:molecular_function:actin-dependent ATPase activity	GO:0005524:molecular_function:ATP binding	GO:0042623:molecular_function:ATPase activity, coupled	GO:0003774:molecular_function:motor activity	GO:0042803:molecular_function:protein homodimerization activity	GO:0008307:molecular_function:structural constituent of muscle	GO:0007527:biological_process:adult somatic muscle development	GO:0006200:biological_process:ATP catabolic process	GO:0007298:biological_process:border follicle cell migration	GO:0007427:biological_process:epithelial cell migration, open tracheal system	GO:0060361:biological_process:flight	GO:0040011:biological_process:locomotion	GO:0042692:biological_process:muscle cell differentiation	GO:0006936:biological_process:muscle contraction	GO:0007517:biological_process:muscle organ development	GO:0030239:biological_process:myofibril assembly	GO:0031033:biological_process:myosin filament organization	GO:0050821:biological_process:protein stabilization	GO:0045214:biological_process:sarcomere organization	GO:0030241:biological_process:skeletal muscle myosin thick filament assembly
Locus_22632.0|BlastHit|gi|13959572|sp|Q9VZD5.1|RT06_DROME	5737	GO:0005763:cellular_component:mitochondrial small ribosomal subunit	GO:0019843:molecular_function:rRNA binding	GO:0003735:molecular_function:structural constituent of ribosome	GO:0006412:biological_process:translation
Locus_22663.0|BlastHit|gi|1709054|sp|P54357.1|MLC2_DROME	5756	GO:0016459:cellular_component:myosin complex	GO:0016460:cellular_component:myosin II complex	GO:0031475:cellular_component:myosin V complex	GO:0031476:cellular_component:myosin VI complex	GO:0031477:cellular_component:myosin VII complex	GO:0005509:molecular_function:calcium ion binding	GO:0017022:molecular_function:myosin binding	GO:0032036:molecular_function:myosin heavy chain binding	GO:0030048:biological_process:actin filament-based movement
Locus_22689.0|BlastHit|gi|12230175|sp|Q9VYD7.1|TIM9_DROME	5777	GO:0005743:cellular_component:mitochondrial inner membrane	GO:0046872:molecular_function:metal ion binding	GO:0015031:biological_process:protein transport
Locus_22696.0|BlastHit|gi|82178683|sp|Q5BL56.1|HMGX4_XENTR	5779	GO:0005634:cellular_component:nucleus	GO:0003677:molecular_function:DNA binding	GO:0019901:molecular_function:protein kinase binding	GO:0007275:biological_process:multicellular organismal development	GO:0030178:biological_process:negative regulation of Wnt signaling pathway	GO:0016055:biological_process:Wnt signaling pathway
Locus_22779.0|BlastHit|gi|62298260|sp|P32234.2|128UP_DROME	5847	GO:0005525:molecular_function:GTP binding
Locus_22783.0|BlastHit|gi|729315|sp|P39675.1|DERP3_DERPT	5849	GO:0005576:cellular_component:extracellular region	GO:0004252:molecular_function:serine-type endopeptidase activity
Locus_22836.0|BlastHit|gi|62901051|sp|Q9DCF9.1|SSRG_MOUSE	5896	GO:0030176:cellular_component:integral component of endoplasmic reticulum membrane	GO:0005784:cellular_component:Sec61 translocon complex	GO:0006613:biological_process:cotranslational protein targeting to membrane
Locus_22839.0|BlastHit|gi|1346058|sp|P47805.1|M1I1A_DANRE	5899	GO:0005737:cellular_component:cytoplasm	GO:0005874:cellular_component:microtubule	GO:0005634:cellular_component:nucleus
Locus_22866.0|BlastHit|gi|353558873|sp|B6VQA1.1|DIMM_DROME	5907	GO:0005737:cellular_component:cytoplasm	GO:0005634:cellular_component:nucleus	GO:0003677:molecular_function:DNA binding	GO:0030154:biological_process:cell differentiation	GO:0007275:biological_process:multicellular organismal development	GO:0046887:biological_process:positive regulation of hormone secretion	GO:0002793:biological_process:positive regulation of peptide secretion	GO:0045944:biological_process:positive regulation of transcription from RNA polymerase II promoter	GO:0006355:biological_process:regulation of transcription, DNA-templated	GO:0006351:biological_process:transcription, DNA-templated
Locus_22868.0|BlastHit|gi|1174470|sp|P46978.1|STT3A_MOUSE	5908	GO:0016021:cellular_component:integral component of membrane	GO:0016020:cellular_component:membrane	GO:0008250:cellular_component:oligosaccharyltransferase complex	GO:0004579:molecular_function:dolichyl-diphosphooligosaccharide-protein glycotransferase activity	GO:0043686:biological_process:co-translational protein modification	GO:0018279:biological_process:protein N-linked glycosylation via asparagine
Locus_22900.0|BlastHit|gi|122140367|sp|Q3T0E1.1|EXOS3_BOVIN	5923	GO:0000177:cellular_component:cytoplasmic exosome (RNase complex)	GO:0000178:cellular_component:exosome (RNase complex)	GO:0000176:cellular_component:nuclear exosome (RNase complex)	GO:0005730:cellular_component:nucleolus	GO:0035327:cellular_component:transcriptionally active chromatin	GO:0003723:molecular_function:RNA binding	GO:0071034:biological_process:CUT catabolic process	GO:0045006:biological_process:DNA deamination	GO:0043928:biological_process:exonucleolytic nuclear-transcribed mRNA catabolic process involved in deadenylation-dependent decay	GO:0045190:biological_process:isotype switching	GO:0045830:biological_process:positive regulation of isotype switching	GO:0006364:biological_process:rRNA processing
Locus_22941.0|BlastHit|gi|121941741|sp|Q2TAA2.1|IAH1_HUMAN	5951	GO:0070062:cellular_component:extracellular vesicular exosome	GO:0016788:molecular_function:hydrolase activity, acting on ester bonds	GO:0016042:biological_process:lipid catabolic process
Locus_22982.0|BlastHit|gi|20140087|sp|Q90XD2.1|SPEB_CHICK	5979	GO:0070062:cellular_component:extracellular vesicular exosome	GO:0005739:cellular_component:mitochondrion	GO:0008783:molecular_function:agmatinase activity	GO:0046872:molecular_function:metal ion binding	GO:0033388:biological_process:putrescine biosynthetic process from arginine	GO:0008295:biological_process:spermidine biosynthetic process
Locus_23023.0|BlastHit|gi|52783378|sp|Q761V0.1|SC6A5_MOUSE	6008	GO:0016021:cellular_component:integral component of membrane	GO:0005328:molecular_function:neurotransmitter:sodium symporter activity
Locus_23041.0|BlastHit|gi|81878771|sp|Q8R0J7.1|VP37B_MOUSE	6024	GO:0010008:cellular_component:endosome membrane	GO:0000813:cellular_component:ESCRT I complex	GO:0070062:cellular_component:extracellular vesicular exosome	GO:0031902:cellular_component:late endosome membrane	GO:0030496:cellular_component:midbody	GO:0016197:biological_process:endosomal transport	GO:0075733:biological_process:intracellular transport of virus	GO:0061024:biological_process:membrane organization	GO:0015031:biological_process:protein transport	GO:0019058:biological_process:viral life cycle	GO:0016032:biological_process:viral process	GO:0019082:biological_process:viral protein processing	GO:0019068:biological_process:virion assembly
Locus_23049.0|BlastHit|gi|160016019|sp|A4IIY1.1|R144A_XENTR	6039	GO:0016021:cellular_component:integral component of membrane	GO:0016874:molecular_function:ligase activity	GO:0008270:molecular_function:zinc ion binding	GO:0016567:biological_process:protein ubiquitination
Locus_23054.1|BlastHit|gi|1717869|sp|P45974.2|UBP5_HUMAN	6043	GO:0005764:cellular_component:lysosome	GO:0004197:molecular_function:cysteine-type endopeptidase activity	GO:0008242:molecular_function:omega peptidase activity	GO:0004221:molecular_function:ubiquitin thiolesterase activity	GO:0008270:molecular_function:zinc ion binding	GO:0032436:biological_process:positive regulation of proteasomal ubiquitin-dependent protein catabolic process	GO:0071108:biological_process:protein K48-linked deubiquitination	GO:0006511:biological_process:ubiquitin-dependent protein catabolic process
Locus_23059.0|BlastHit|gi|82112105|sp|Q98TX3.1|PDCD4_CHICK	6046	GO:0005737:cellular_component:cytoplasm	GO:0005829:cellular_component:cytosol	GO:0005634:cellular_component:nucleus	GO:0003723:molecular_function:RNA binding	GO:0007569:biological_process:cell aging	GO:0043508:biological_process:negative regulation of JUN kinase activity	GO:0045892:biological_process:negative regulation of transcription, DNA-templated
Locus_23118.0|BlastHit|gi|26006755|sp|Q26061.1|FRI_PACLE	6084	GO:0005737:cellular_component:cytoplasm	GO:0008199:molecular_function:ferric iron binding	GO:0004322:molecular_function:ferroxidase activity	GO:0006879:biological_process:cellular iron ion homeostasis	GO:0006826:biological_process:iron ion transport
Locus_23131.0|BlastHit|gi|3915086|sp|Q25008.1|TBA1_HOMAM	6090	GO:0005737:cellular_component:cytoplasm	GO:0005874:cellular_component:microtubule	GO:0005525:molecular_function:GTP binding	GO:0003924:molecular_function:GTPase activity	GO:0005200:molecular_function:structural constituent of cytoskeleton	GO:0007017:biological_process:microtubule-based process	GO:0051258:biological_process:protein polymerization
Locus_23147.0|BlastHit|gi|20140568|sp|Q13148.1|TADBP_HUMAN	6100	GO:0005634:cellular_component:nucleus	GO:0003690:molecular_function:double-stranded DNA binding	GO:0042802:molecular_function:identical protein binding	GO:0003730:molecular_function:mRNA 3'-UTR binding	GO:0000166:molecular_function:nucleotide binding	GO:0044822:molecular_function:poly(A) RNA binding	GO:0003723:molecular_function:RNA binding	GO:0001205:molecular_function:RNA polymerase II distal enhancer sequence-specific DNA binding transcription factor activity involved in positive regulation of transcription	GO:0003700:molecular_function:sequence-specific DNA binding transcription factor activity	GO:0070935:biological_process:3'-UTR-mediated mRNA stabilization	GO:0006397:biological_process:mRNA processing	GO:0043922:biological_process:negative regulation by host of viral transcription	GO:0008380:biological_process:RNA splicing	GO:0006366:biological_process:transcription from RNA polymerase II promoter
Locus_23157.0|BlastHit|gi|10720057|sp|Q9VAS7.1|INX3_DROME	6108	GO:0016327:cellular_component:apicolateral plasma membrane	GO:0005737:cellular_component:cytoplasm	GO:0005921:cellular_component:gap junction	GO:0016021:cellular_component:integral component of membrane	GO:0016328:cellular_component:lateral plasma membrane	GO:0005886:cellular_component:plasma membrane	GO:0005243:molecular_function:gap junction channel activity	GO:0007391:biological_process:dorsal closure	GO:0010496:biological_process:intercellular transport	GO:0006811:biological_process:ion transport	GO:0055085:biological_process:transmembrane transport
Locus_23160.0|BlastHit|gi|54036435|sp|O35814.1|STIP1_RAT	6109	GO:0005737:cellular_component:cytoplasm	GO:0005634:cellular_component:nucleus	GO:0043234:cellular_component:protein complex	GO:0051087:molecular_function:chaperone binding	GO:0030544:molecular_function:Hsp70 protein binding	GO:0008022:molecular_function:protein C-terminus binding
Locus_23175.0|BlastHit|gi|172048426|sp|A9ULE9.1|DJC22_XENTR	6123	GO:0016021:cellular_component:integral component of membrane
Locus_23181.0|BlastHit|gi|205831550|sp|Q03168.2|ASPP_AEDAE	6127	GO:0005764:cellular_component:lysosome	GO:0004190:molecular_function:aspartic-type endopeptidase activity
Locus_23182.0|BlastHit|gi|83286899|sp|P69478.1|CHSTB_RAT	6128	GO:0000139:cellular_component:Golgi membrane	GO:0016021:cellular_component:integral component of membrane	GO:0047756:molecular_function:chondroitin 4-sulfotransferase activity	GO:0001537:molecular_function:N-acetylgalactosamine 4-O-sulfotransferase activity	GO:0050659:molecular_function:N-acetylgalactosamine 4-sulfate 6-O-sulfotransferase activity	GO:0016051:biological_process:carbohydrate biosynthetic process	GO:0002063:biological_process:chondrocyte development	GO:0030206:biological_process:chondroitin sulfate biosynthetic process	GO:0048589:biological_process:developmental growth	GO:0042733:biological_process:embryonic digit morphogenesis	GO:0048703:biological_process:embryonic viscerocranium morphogenesis	GO:0043066:biological_process:negative regulation of apoptotic process	GO:0030512:biological_process:negative regulation of transforming growth factor beta receptor signaling pathway	GO:0033037:biological_process:polysaccharide localization	GO:0036342:biological_process:post-anal tail morphogenesis	GO:0009791:biological_process:post-embryonic development	GO:0042127:biological_process:regulation of cell proliferation	GO:0007585:biological_process:respiratory gaseous exchange
Locus_23185.0|BlastHit|gi|82201095|sp|Q6GPD0.1|RHG32_XENLA	6133	GO:0005737:cellular_component:cytoplasm	GO:0005886:cellular_component:plasma membrane	GO:0005096:molecular_function:GTPase activator activity	GO:0035091:molecular_function:phosphatidylinositol binding	GO:0007165:biological_process:signal transduction
Locus_23210.0|BlastHit|gi|55976220|sp|O88543.3|CSN3_MOUSE	6158	GO:0008180:cellular_component:COP9 signalosome	GO:0005737:cellular_component:cytoplasm	GO:0010388:biological_process:cullin deneddylation	GO:0001701:biological_process:in utero embryonic development
Locus_23212.1|BlastHit|gi|82186165|sp|Q6P112.1|RGL1_DANRE	6159	GO:0005829:cellular_component:cytosol	GO:0008321:molecular_function:Ral guanyl-nucleotide exchange factor activity	GO:0044255:biological_process:cellular lipid metabolic process	GO:0032852:biological_process:positive regulation of Ral GTPase activity	GO:0007264:biological_process:small GTPase mediated signal transduction	GO:0044281:biological_process:small molecule metabolic process
Locus_23213.0|BlastHit|gi|34395570|sp|Q9D9I4.1|TBC20_MOUSE	6160	GO:0016021:cellular_component:integral component of membrane	GO:0005097:molecular_function:Rab GTPase activator activity	GO:0001675:biological_process:acrosome assembly	GO:0043010:biological_process:camera-type eye development	GO:0007030:biological_process:Golgi organization	GO:0002088:biological_process:lens development in camera-type eye	GO:0070309:biological_process:lens fiber cell morphogenesis	GO:0034389:biological_process:lipid particle organization	GO:0008584:biological_process:male gonad development	GO:0072520:biological_process:seminiferous tubule development	GO:0007283:biological_process:spermatogenesis
Locus_23214.1|BlastHit|gi|136032|sp|P06708.1|TNNC2_PONLE	6162	GO:0005509:molecular_function:calcium ion binding
Locus_23220.0|BlastHit|gi|73620981|sp|P12252.4|PDE4B_DROME	6169	GO:0004114:molecular_function:3',5'-cyclic-nucleotide phosphodiesterase activity	GO:0046872:molecular_function:metal ion binding	GO:0008306:biological_process:associative learning	GO:0048675:biological_process:axon extension	GO:0048149:biological_process:behavioral response to ethanol	GO:0006198:biological_process:cAMP catabolic process	GO:0019933:biological_process:cAMP-mediated signaling	GO:0007623:biological_process:circadian rhythm	GO:0001661:biological_process:conditioned taste aversion	GO:0007619:biological_process:courtship behavior	GO:0046331:biological_process:lateral inhibition	GO:0007612:biological_process:learning	GO:0007611:biological_process:learning or memory	GO:0045475:biological_process:locomotor rhythm	GO:0007617:biological_process:mating behavior	GO:0007613:biological_process:memory	GO:0046958:biological_process:nonassociative learning	GO:0008355:biological_process:olfactory learning	GO:0048477:biological_process:oogenesis	GO:0010738:biological_process:regulation of protein kinase A signaling	GO:0000003:biological_process:reproduction	GO:0007614:biological_process:short-term memory	GO:0007268:biological_process:synaptic transmission	GO:0040040:biological_process:thermosensory behavior
Locus_23229.0|BlastHit|gi|112987|sp|P00507.2|AATM_RAT	6172	GO:0009986:cellular_component:cell surface	GO:0005743:cellular_component:mitochondrial inner membrane	GO:0005759:cellular_component:mitochondrial matrix	GO:0005739:cellular_component:mitochondrion	GO:0043204:cellular_component:perikaryon	GO:0005886:cellular_component:plasma membrane	GO:0043234:cellular_component:protein complex	GO:0016597:molecular_function:amino acid binding	GO:0031406:molecular_function:carboxylic acid binding	GO:0019899:molecular_function:enzyme binding	GO:0016212:molecular_function:kynurenine-oxoglutarate transaminase activity	GO:0004069:molecular_function:L-aspartate:2-oxoglutarate aminotransferase activity	GO:0080130:molecular_function:L-phenylalanine:2-oxoglutarate aminotransferase activity	GO:0005543:molecular_function:phospholipid binding	GO:0042803:molecular_function:protein homodimerization activity	GO:0030170:molecular_function:pyridoxal phosphate binding	GO:0006103:biological_process:2-oxoglutarate metabolic process	GO:0006531:biological_process:aspartate metabolic process	GO:0009058:biological_process:biosynthetic process	GO:0006520:biological_process:cellular amino acid metabolic process	GO:0043648:biological_process:dicarboxylic acid metabolic process	GO:0015908:biological_process:fatty acid transport	GO:0006536:biological_process:glutamate metabolic process
Locus_23232.0|BlastHit|gi|75042307|sp|Q5RDB5.1|CNIH_PONAB	6173	GO:0005789:cellular_component:endoplasmic reticulum membrane	GO:0016021:cellular_component:integral component of membrane	GO:0009952:biological_process:anterior/posterior pattern specification	GO:0045450:biological_process:bicoid mRNA localization	GO:0007350:biological_process:blastoderm segmentation	GO:0046843:biological_process:dorsal appendage formation	GO:0009953:biological_process:dorsal/ventral pattern formation	GO:0006888:biological_process:ER to Golgi vesicle-mediated transport	GO:0030722:biological_process:establishment of oocyte nucleus localization involved in oocyte dorsal/ventral axis specification	GO:0008314:biological_process:gurken signaling pathway	GO:0008298:biological_process:intracellular mRNA localization	GO:0035556:biological_process:intracellular signal transduction	GO:0007314:biological_process:oocyte anterior/posterior axis specification	GO:0007310:biological_process:oocyte dorsal/ventral axis specification	GO:0045451:biological_process:pole plasm oskar mRNA localization	GO:0015031:biological_process:protein transport	GO:0016192:biological_process:vesicle-mediated transport
Locus_23235.0|BlastHit|gi|110825729|sp|P05661.4|MYSA_DROME	6177	GO:0031672:cellular_component:A band	GO:0016459:cellular_component:myosin complex	GO:0032982:cellular_component:myosin filament	GO:0005703:cellular_component:polytene chromosome puff	GO:0030017:cellular_component:sarcomere	GO:0030898:molecular_function:actin-dependent ATPase activity	GO:0005524:molecular_function:ATP binding	GO:0042623:molecular_function:ATPase activity, coupled	GO:0003774:molecular_function:motor activity	GO:0042803:molecular_function:protein homodimerization activity	GO:0008307:molecular_function:structural constituent of muscle	GO:0007527:biological_process:adult somatic muscle development	GO:0006200:biological_process:ATP catabolic process	GO:0007298:biological_process:border follicle cell migration	GO:0007427:biological_process:epithelial cell migration, open tracheal system	GO:0060361:biological_process:flight	GO:0040011:biological_process:locomotion	GO:0042692:biological_process:muscle cell differentiation	GO:0006936:biological_process:muscle contraction	GO:0007517:biological_process:muscle organ development	GO:0030239:biological_process:myofibril assembly	GO:0031033:biological_process:myosin filament organization	GO:0050821:biological_process:protein stabilization	GO:0045214:biological_process:sarcomere organization	GO:0030241:biological_process:skeletal muscle myosin thick filament assembly
Locus_23254.0|BlastHit|gi|81904267|sp|Q9CX11.1|UTP23_MOUSE	6186	GO:0005730:cellular_component:nucleolus	GO:0032040:cellular_component:small-subunit processome	GO:0044822:molecular_function:poly(A) RNA binding	GO:0006364:biological_process:rRNA processing
Locus_23259.0|BlastHit|gi|9087114|sp|O08918.3|CCNG2_MOUSE	6189	GO:0005737:cellular_component:cytoplasm	GO:0005634:cellular_component:nucleus	GO:0007067:biological_process:mitotic nuclear division	GO:0051726:biological_process:regulation of cell cycle
Locus_23276.0|BlastHit|gi|76800653|sp|Q05319.2|STUB_DROME	6206	GO:0005576:cellular_component:extracellular region	GO:0008201:molecular_function:heparin binding	GO:0008233:molecular_function:peptidase activity	GO:0004252:molecular_function:serine-type endopeptidase activity	GO:0006954:biological_process:inflammatory response
Locus_23288.0|BlastHit|gi|52000827|sp|Q8HXG6.3|NDUAB_BOVIN	6217	GO:0016021:cellular_component:integral component of membrane	GO:0005743:cellular_component:mitochondrial inner membrane	GO:0005739:cellular_component:mitochondrion	GO:0070469:cellular_component:respiratory chain	GO:0055114:biological_process:oxidation-reduction process
Locus_23296.0|BlastHit|gi|62906874|sp|Q13685.2|AAMP_HUMAN	6241	GO:0009986:cellular_component:cell surface	GO:0005737:cellular_component:cytoplasm	GO:0005886:cellular_component:plasma membrane	GO:0008201:molecular_function:heparin binding	GO:0001525:biological_process:angiogenesis	GO:0030154:biological_process:cell differentiation	GO:0010595:biological_process:positive regulation of endothelial cell migration	GO:0014909:biological_process:smooth muscle cell migration
Locus_23317.0|BlastHit|gi|47117852|sp|P46718.2|PDCD2_MOUSE	6254	GO:0005737:cellular_component:cytoplasm	GO:0070062:cellular_component:extracellular vesicular exosome	GO:0005634:cellular_component:nucleus	GO:0003677:molecular_function:DNA binding	GO:0046872:molecular_function:metal ion binding	GO:0006915:biological_process:apoptotic process
Locus_23327.0|BlastHit|gi|51701863|sp|Q9V3H2.1|PSDE_DROME	6257	GO:0005875:cellular_component:microtubule associated complex	GO:0005838:cellular_component:proteasome regulatory particle	GO:0008541:cellular_component:proteasome regulatory particle, lid subcomplex	GO:0046872:molecular_function:metal ion binding	GO:0008237:molecular_function:metallopeptidase activity	GO:0009987:biological_process:cellular process	GO:0032436:biological_process:positive regulation of proteasomal ubiquitin-dependent protein catabolic process	GO:0043161:biological_process:proteasome-mediated ubiquitin-dependent protein catabolic process	GO:0006508:biological_process:proteolysis
Locus_23327.0|BlastHit|gi|51701863|sp|Q9V3H2.1|PSDE_DROME	6257	GO:0034451:cellular_component:centriolar satellite	GO:0005814:cellular_component:centriole	GO:0005929:cellular_component:cilium	GO:0061511:biological_process:centriole elongation	GO:0035058:biological_process:nonmotile primary cilium assembly	GO:0071539:biological_process:protein localization to centrosome
Locus_23334.0|BlastHit|gi|130859|sp|P25788.2|PSA3_HUMAN	6261	GO:0005737:cellular_component:cytoplasm	GO:0005829:cellular_component:cytosol	GO:0070062:cellular_component:extracellular vesicular exosome	GO:0005654:cellular_component:nucleoplasm	GO:0005634:cellular_component:nucleus	GO:0000502:cellular_component:proteasome complex	GO:0005839:cellular_component:proteasome core complex	GO:0019773:cellular_component:proteasome core complex, alpha-subunit complex	GO:0004298:molecular_function:threonine-type endopeptidase activity	GO:0031145:biological_process:anaphase-promoting complex-dependent proteasomal ubiquitin-dependent protein catabolic process	GO:0042590:biological_process:antigen processing and presentation of exogenous peptide antigen via MHC class I	GO:0002479:biological_process:antigen processing and presentation of exogenous peptide antigen via MHC class I, TAP-dependent	GO:0002474:biological_process:antigen processing and presentation of peptide antigen via MHC class I	GO:0006915:biological_process:apoptotic process	GO:0034641:biological_process:cellular nitrogen compound metabolic process	GO:0006977:biological_process:DNA damage response, signal transduction by p53 class mediator resulting in cell cycle arrest	GO:0000082:biological_process:G1/S transition of mitotic cell cycle	GO:0010467:biological_process:gene expression	GO:0000278:biological_process:mitotic cell cycle	GO:0016071:biological_process:mRNA metabolic process	GO:0043066:biological_process:negative regulation of apoptotic process	GO:0051436:biological_process:negative regulation of ubiquitin-protein ligase activity involved in mitotic cell cycle	GO:0051437:biological_process:positive regulation of ubiquitin-protein ligase activity involved in regulation of mitotic cell cycle transition	GO:0000209:biological_process:protein polyubiquitination	GO:0042981:biological_process:regulation of apoptotic process	GO:0006521:biological_process:regulation of cellular amino acid metabolic process	GO:0051439:biological_process:regulation of ubiquitin-protein ligase activity involved in mitotic cell cycle	GO:0016070:biological_process:RNA metabolic process	GO:0044281:biological_process:small molecule metabolic process	GO:0016032:biological_process:viral process
Locus_23347.0|BlastHit|gi|116242812|sp|P29083.2|T2EA_HUMAN	6265	GO:0045111:cellular_component:intermediate filament cytoskeleton	GO:0005654:cellular_component:nucleoplasm	GO:0005634:cellular_component:nucleus	GO:0046872:molecular_function:metal ion binding	GO:0043565:molecular_function:sequence-specific DNA binding	GO:0010467:biological_process:gene expression	GO:0006355:biological_process:regulation of transcription, DNA-templated	GO:0006368:biological_process:transcription elongation from RNA polymerase II promoter	GO:0006366:biological_process:transcription from RNA polymerase II promoter	GO:0006367:biological_process:transcription initiation from RNA polymerase II promoter	GO:0016032:biological_process:viral process
Locus_23361.0|BlastHit|gi|116248088|sp|Q32L93.1|GMPR2_BOVIN	6270	GO:1902560:cellular_component:GMP reductase complex	GO:0003920:molecular_function:GMP reductase activity	GO:0046872:molecular_function:metal ion binding	GO:0046037:biological_process:GMP metabolic process	GO:0006144:biological_process:purine nucleobase metabolic process
Locus_23367.0|BlastHit|gi|13431855|sp|P97281.1|SGCD_MESAU	6274	GO:0005737:cellular_component:cytoplasm	GO:0005856:cellular_component:cytoskeleton	GO:0016021:cellular_component:integral component of membrane	GO:0016012:cellular_component:sarcoglycan complex	GO:0042383:cellular_component:sarcolemma
Locus_23468.0|BlastHit|gi|82084052|sp|Q66XS7.1|NDUS4_GECJA	6361	GO:0005743:cellular_component:mitochondrial inner membrane	GO:0005747:cellular_component:mitochondrial respiratory chain complex I	GO:0005739:cellular_component:mitochondrion	GO:0008137:molecular_function:NADH dehydrogenase (ubiquinone) activity	GO:0007420:biological_process:brain development	GO:0019933:biological_process:cAMP-mediated signaling	GO:0044237:biological_process:cellular metabolic process	GO:0045333:biological_process:cellular respiration	GO:0006120:biological_process:mitochondrial electron transport, NADH to ubiquinone	GO:0032981:biological_process:mitochondrial respiratory chain complex I assembly	GO:0048146:biological_process:positive regulation of fibroblast proliferation	GO:0072593:biological_process:reactive oxygen species metabolic process	GO:0001932:biological_process:regulation of protein phosphorylation	GO:0022904:biological_process:respiratory electron transport chain	GO:0051591:biological_process:response to cAMP	GO:0044281:biological_process:small molecule metabolic process
Locus_23480.0|BlastHit|gi|148886601|sp|Q502L2.2|PGAM5_DANRE	6367	GO:0016021:cellular_component:integral component of membrane	GO:0005741:cellular_component:mitochondrial outer membrane	GO:0005096:molecular_function:GTPase activator activity	GO:0016791:molecular_function:phosphatase activity	GO:0004721:molecular_function:phosphoprotein phosphatase activity	GO:0016311:biological_process:dephosphorylation	GO:0070266:biological_process:necroptotic process	GO:0043547:biological_process:positive regulation of GTPase activity
Locus_23483.0|BlastHit|gi|122069625|sp|Q2TBS2.1|RM21_BOVIN	6369	GO:0005739:cellular_component:mitochondrion	GO:0005840:cellular_component:ribosome
Locus_23489.0|BlastHit|gi|74734684|sp|Q9NX20.1|RM16_HUMAN	6371	GO:0005739:cellular_component:mitochondrion	GO:0005840:cellular_component:ribosome	GO:0019843:molecular_function:rRNA binding	GO:0003735:molecular_function:structural constituent of ribosome	GO:0006412:biological_process:translation
Locus_23494.0|BlastHit|gi|134312|sp|P02636.1|SCPA_PENSP	6379	GO:0005509:molecular_function:calcium ion binding
Locus_23494.0|BlastHit|gi|134312|sp|P02636.1|SCPA_PENSP	6379	GO:0005634:cellular_component:nucleus	GO:0005674:cellular_component:transcription factor TFIIF complex	GO:0003677:molecular_function:DNA binding	GO:0001096:molecular_function:TFIIF-class transcription factor binding	GO:0016740:molecular_function:transferase activity	GO:0022008:biological_process:neurogenesis	GO:0032968:biological_process:positive regulation of transcription elongation from RNA polymerase II promoter	GO:0045944:biological_process:positive regulation of transcription from RNA polymerase II promoter	GO:0060261:biological_process:positive regulation of transcription initiation from RNA polymerase II promoter	GO:0006367:biological_process:transcription initiation from RNA polymerase II promoter
Locus_23494.0|BlastHit|gi|134312|sp|P02636.1|SCPA_PENSP	6381	GO:0005509:molecular_function:calcium ion binding
Locus_23494.0|BlastHit|gi|134312|sp|P02636.1|SCPA_PENSP	6381	GO:0005634:cellular_component:nucleus	GO:0005674:cellular_component:transcription factor TFIIF complex	GO:0003677:molecular_function:DNA binding	GO:0001096:molecular_function:TFIIF-class transcription factor binding	GO:0016740:molecular_function:transferase activity	GO:0022008:biological_process:neurogenesis	GO:0032968:biological_process:positive regulation of transcription elongation from RNA polymerase II promoter	GO:0045944:biological_process:positive regulation of transcription from RNA polymerase II promoter	GO:0060261:biological_process:positive regulation of transcription initiation from RNA polymerase II promoter	GO:0006367:biological_process:transcription initiation from RNA polymerase II promoter
Locus_23495.0|BlastHit|gi|122125964|sp|Q4N4N8.1|TXND_THEPA	6382	GO:0005789:cellular_component:endoplasmic reticulum membrane	GO:0016021:cellular_component:integral component of membrane	GO:0045454:biological_process:cell redox homeostasis
Locus_23547.0|BlastHit|gi|75058087|sp|Q7YR75.1|RM12_BOVIN	6417	GO:0005762:cellular_component:mitochondrial large ribosomal subunit	GO:0003735:molecular_function:structural constituent of ribosome	GO:0006412:biological_process:translation
Locus_23556.0|BlastHit|gi|1703454|sp|P07584.2|ASTA_ASTFL	6426	GO:0060473:cellular_component:cortical granule	GO:0005737:cellular_component:cytoplasm	GO:0005886:cellular_component:plasma membrane	GO:0070001:molecular_function:aspartic-type peptidase activity	GO:0070002:molecular_function:glutamic-type peptidase activity	GO:0004222:molecular_function:metalloendopeptidase activity	GO:0008233:molecular_function:peptidase activity	GO:0008270:molecular_function:zinc ion binding	GO:0007155:biological_process:cell adhesion	GO:0009566:biological_process:fertilization	GO:2000360:biological_process:negative regulation of binding of sperm to zona pellucida	GO:0010954:biological_process:positive regulation of protein processing	GO:0060468:biological_process:prevention of polyspermy
Locus_23556.0|BlastHit|gi|1703454|sp|P07584.2|ASTA_ASTFL	6430	GO:0060473:cellular_component:cortical granule	GO:0005737:cellular_component:cytoplasm	GO:0005886:cellular_component:plasma membrane	GO:0070001:molecular_function:aspartic-type peptidase activity	GO:0070002:molecular_function:glutamic-type peptidase activity	GO:0004222:molecular_function:metalloendopeptidase activity	GO:0008233:molecular_function:peptidase activity	GO:0008270:molecular_function:zinc ion binding	GO:0007155:biological_process:cell adhesion	GO:0009566:biological_process:fertilization	GO:2000360:biological_process:negative regulation of binding of sperm to zona pellucida	GO:0010954:biological_process:positive regulation of protein processing	GO:0060468:biological_process:prevention of polyspermy
Locus_23568.0|BlastHit|gi|73917775|sp|Q503V0.3|CHMP6_DANRE	6439	GO:0070062:cellular_component:extracellular vesicular exosome	GO:0031902:cellular_component:late endosome membrane	GO:0015031:biological_process:protein transport
Locus_23575.0|BlastHit|gi|135400|sp|P18258.1|TBA1_PARLI	6446	GO:0005737:cellular_component:cytoplasm	GO:0005874:cellular_component:microtubule	GO:0005525:molecular_function:GTP binding	GO:0003924:molecular_function:GTPase activity	GO:0005200:molecular_function:structural constituent of cytoskeleton	GO:0007017:biological_process:microtubule-based process	GO:0051258:biological_process:protein polymerization
Locus_23587.0|BlastHit|gi|123900566|sp|Q3KRG3.1|TSR2_DANRE	6453	GO:0006364:biological_process:rRNA processing
Locus_23589.0|BlastHit|gi|148877250|sp|Q9FKK7.2|XYLA_ARATH	6454	GO:0005783:cellular_component:endoplasmic reticulum	GO:0005794:cellular_component:Golgi apparatus	GO:0005774:cellular_component:vacuolar membrane	GO:0005773:cellular_component:vacuole	GO:0046872:molecular_function:metal ion binding	GO:0009045:molecular_function:xylose isomerase activity	GO:0042732:biological_process:D-xylose metabolic process	GO:0006098:biological_process:pentose-phosphate shunt
Locus_23601.0|BlastHit|gi|12230174|sp|Q9VTN3.1|TIM13_DROME	6487	GO:0005743:cellular_component:mitochondrial inner membrane	GO:0046872:molecular_function:metal ion binding	GO:0015031:biological_process:protein transport
Locus_23614.0|BlastHit|gi|76364210|sp|Q6AXX4.1|SAS10_RAT	6494	GO:0005634:cellular_component:nucleus	GO:0003723:molecular_function:RNA binding	GO:0016568:biological_process:chromatin modification	GO:0022008:biological_process:neurogenesis
Locus_23637.0|BlastHit|gi|68068004|sp|P47948.2|TNNC2_DROME	6504	GO:0005509:molecular_function:calcium ion binding
Locus_23680.0|BlastHit|gi|14285410|sp|Q9Y3B2.1|EXOS1_HUMAN	6526	GO:0005829:cellular_component:cytosol	GO:0000178:cellular_component:exosome (RNase complex)	GO:0005730:cellular_component:nucleolus	GO:0005634:cellular_component:nucleus	GO:0003723:molecular_function:RNA binding	GO:0043928:biological_process:exonucleolytic nuclear-transcribed mRNA catabolic process involved in deadenylation-dependent decay	GO:0010467:biological_process:gene expression	GO:0016071:biological_process:mRNA metabolic process	GO:0000288:biological_process:nuclear-transcribed mRNA catabolic process, deadenylation-dependent decay	GO:0016070:biological_process:RNA metabolic process	GO:0006364:biological_process:rRNA processing
Locus_23689.0|BlastHit|gi|38372258|sp|Q9VCY8.2|ADRL_DROME	6530	GO:0016021:cellular_component:integral component of membrane	GO:0005886:cellular_component:plasma membrane	GO:0042562:molecular_function:hormone binding	GO:0004872:molecular_function:receptor activity	GO:0033211:biological_process:adiponectin-activated signaling pathway	GO:0019395:biological_process:fatty acid oxidation	GO:0042593:biological_process:glucose homeostasis	GO:0009755:biological_process:hormone-mediated signaling pathway	GO:0032024:biological_process:positive regulation of insulin secretion	GO:0070328:biological_process:triglyceride homeostasis
Locus_23714.0|BlastHit|gi|75041488|sp|Q5R802.1|KANL2_PONAB	6560	GO:0000123:cellular_component:histone acetyltransferase complex	GO:0046972:molecular_function:histone acetyltransferase activity (H4-K16 specific)	GO:0043995:molecular_function:histone acetyltransferase activity (H4-K5 specific)	GO:0043996:molecular_function:histone acetyltransferase activity (H4-K8 specific)	GO:0043984:biological_process:histone H4-K16 acetylation	GO:0043981:biological_process:histone H4-K5 acetylation	GO:0043982:biological_process:histone H4-K8 acetylation
Locus_23717.0|BlastHit|gi|221222478|sp|Q290P4.2|RM52_DROPS	6561	GO:0005762:cellular_component:mitochondrial large ribosomal subunit	GO:0003735:molecular_function:structural constituent of ribosome	GO:0006412:biological_process:translation
Locus_23732.0|BlastHit|gi|5902742|sp|P79896.1|ADHX_SPAAU	6566	GO:0005737:cellular_component:cytoplasm	GO:0004022:molecular_function:alcohol dehydrogenase (NAD) activity	GO:0051903:molecular_function:S-(hydroxymethyl)glutathione dehydrogenase activity	GO:0008270:molecular_function:zinc ion binding	GO:0006069:biological_process:ethanol oxidation
Locus_23732.0|BlastHit|gi|5902742|sp|P79896.1|ADHX_SPAAU	6567	GO:0005737:cellular_component:cytoplasm	GO:0004022:molecular_function:alcohol dehydrogenase (NAD) activity	GO:0051903:molecular_function:S-(hydroxymethyl)glutathione dehydrogenase activity	GO:0008270:molecular_function:zinc ion binding	GO:0006069:biological_process:ethanol oxidation
Locus_23744.0|BlastHit|gi|62510825|sp|Q94901.1|LARK_DROME	6575	GO:0071013:cellular_component:catalytic step 2 spliceosome	GO:0005737:cellular_component:cytoplasm	GO:0005634:cellular_component:nucleus	GO:0071011:cellular_component:precatalytic spliceosome	GO:0003729:molecular_function:mRNA binding	GO:0000166:molecular_function:nucleotide binding	GO:0003723:molecular_function:RNA binding	GO:0008270:molecular_function:zinc ion binding	GO:0030036:biological_process:actin cytoskeleton organization	GO:0007623:biological_process:circadian rhythm	GO:0007303:biological_process:cytoplasmic transport, nurse cell to oocyte	GO:0007562:biological_process:eclosion	GO:0008062:biological_process:eclosion rhythm	GO:0009790:biological_process:embryo development	GO:0045475:biological_process:locomotor rhythm	GO:0007067:biological_process:mitotic nuclear division	GO:0000398:biological_process:mRNA splicing, via spliceosome	GO:0045804:biological_process:negative regulation of eclosion	GO:0008104:biological_process:protein localization
Locus_23744.1|BlastHit|gi|62510825|sp|Q94901.1|LARK_DROME	6576	GO:0071013:cellular_component:catalytic step 2 spliceosome	GO:0005737:cellular_component:cytoplasm	GO:0005634:cellular_component:nucleus	GO:0071011:cellular_component:precatalytic spliceosome	GO:0003729:molecular_function:mRNA binding	GO:0000166:molecular_function:nucleotide binding	GO:0003723:molecular_function:RNA binding	GO:0008270:molecular_function:zinc ion binding	GO:0030036:biological_process:actin cytoskeleton organization	GO:0007623:biological_process:circadian rhythm	GO:0007303:biological_process:cytoplasmic transport, nurse cell to oocyte	GO:0007562:biological_process:eclosion	GO:0008062:biological_process:eclosion rhythm	GO:0009790:biological_process:embryo development	GO:0045475:biological_process:locomotor rhythm	GO:0007067:biological_process:mitotic nuclear division	GO:0000398:biological_process:mRNA splicing, via spliceosome	GO:0045804:biological_process:negative regulation of eclosion	GO:0008104:biological_process:protein localization
Locus_23749.0|BlastHit|gi|23822301|sp|Q9CY21.1|WBS22_MOUSE	6581	GO:0005737:cellular_component:cytoplasm	GO:0005634:cellular_component:nucleus	GO:0008168:molecular_function:methyltransferase activity	GO:0044822:molecular_function:poly(A) RNA binding	GO:0016568:biological_process:chromatin modification	GO:0006355:biological_process:regulation of transcription, DNA-templated	GO:0006364:biological_process:rRNA processing	GO:0006351:biological_process:transcription, DNA-templated
Locus_23783.0|BlastHit|gi|341940223|sp|Q8CJF9.2|AGO3_MOUSE	6600	GO:0000932:cellular_component:cytoplasmic mRNA processing body	GO:0016020:cellular_component:membrane	GO:0035068:cellular_component:micro-ribonucleoprotein complex	GO:0016442:cellular_component:RISC complex	GO:0035198:molecular_function:miRNA binding	GO:0044822:molecular_function:poly(A) RNA binding	GO:0003723:molecular_function:RNA binding	GO:0006402:biological_process:mRNA catabolic process	GO:0035278:biological_process:negative regulation of translation involved in gene silencing by miRNA	GO:0072091:biological_process:regulation of stem cell proliferation
Locus_23784.0|BlastHit|gi|50401534|sp|Q7ZW41.1|RPB7_DANRE	6601	GO:0000932:cellular_component:cytoplasmic mRNA processing body	GO:0005665:cellular_component:DNA-directed RNA polymerase II, core complex	GO:0005634:cellular_component:nucleus	GO:0003899:molecular_function:DNA-directed RNA polymerase activity	GO:0003697:molecular_function:single-stranded DNA binding	GO:0003727:molecular_function:single-stranded RNA binding	GO:0031369:molecular_function:translation initiation factor binding	GO:0000291:biological_process:nuclear-transcribed mRNA catabolic process, exonucleolytic	GO:0060213:biological_process:positive regulation of nuclear-transcribed mRNA poly(A) tail shortening	GO:0045948:biological_process:positive regulation of translational initiation	GO:0006366:biological_process:transcription from RNA polymerase II promoter	GO:0006367:biological_process:transcription initiation from RNA polymerase II promoter
Locus_23830.0|BlastHit|gi|119367489|sp|Q28GH3.1|SAE2_XENTR	6625	GO:0005737:cellular_component:cytoplasm	GO:0005634:cellular_component:nucleus	GO:0005524:molecular_function:ATP binding	GO:0016874:molecular_function:ligase activity	GO:0046872:molecular_function:metal ion binding	GO:0019948:molecular_function:SUMO activating enzyme activity	GO:0016925:biological_process:protein sumoylation
Locus_23855.0|BlastHit|gi|6226823|sp|P97576.2|GRPE1_RAT	6634	GO:0005759:cellular_component:mitochondrial matrix	GO:0000774:molecular_function:adenyl-nucleotide exchange factor activity	GO:0006457:biological_process:protein folding
Locus_23860.0|BlastHit|gi|59803098|sp|Q16851.5|UGPA_HUMAN	6638	GO:0005885:cellular_component:Arp2/3 protein complex	GO:0005737:cellular_component:cytoplasm	GO:0030027:cellular_component:lamellipodium	GO:0030833:biological_process:regulation of actin filament polymerization
Locus_23860.0|BlastHit|gi|59803098|sp|Q16851.5|UGPA_HUMAN	6638	GO:0005829:cellular_component:cytosol	GO:0070062:cellular_component:extracellular vesicular exosome	GO:0005634:cellular_component:nucleus	GO:0005536:molecular_function:glucose binding	GO:0046872:molecular_function:metal ion binding	GO:0032557:molecular_function:pyrimidine ribonucleotide binding	GO:0003983:molecular_function:UTP:glucose-1-phosphate uridylyltransferase activity	GO:0005975:biological_process:carbohydrate metabolic process	GO:0052695:biological_process:cellular glucuronidation	GO:0019255:biological_process:glucose 1-phosphate metabolic process	GO:0006006:biological_process:glucose metabolic process	GO:0005978:biological_process:glycogen biosynthetic process	GO:0044281:biological_process:small molecule metabolic process	GO:0006011:biological_process:UDP-glucose metabolic process	GO:0006065:biological_process:UDP-glucuronate biosynthetic process	GO:0006805:biological_process:xenobiotic metabolic process
Locus_23868.0|BlastHit|gi|18266783|sp|O55029.2|COPB2_MOUSE	6643	GO:0030126:cellular_component:COPI vesicle coat	GO:0005829:cellular_component:cytosol	GO:0005794:cellular_component:Golgi apparatus	GO:0000139:cellular_component:Golgi membrane	GO:0005080:molecular_function:protein kinase C binding	GO:0005198:molecular_function:structural molecule activity	GO:0006891:biological_process:intra-Golgi vesicle-mediated transport	GO:0006886:biological_process:intracellular protein transport	GO:0006890:biological_process:retrograde vesicle-mediated transport, Golgi to ER
Locus_23951.0|BlastHit|gi|30913033|sp|Q8WSF3.1|FDL_DROME	6684	GO:0005770:cellular_component:late endosome	GO:0005886:cellular_component:plasma membrane	GO:0016231:molecular_function:beta-N-acetylglucosaminidase activity	GO:0004563:molecular_function:beta-N-acetylhexosaminidase activity	GO:0007420:biological_process:brain development	GO:0006491:biological_process:N-glycan processing
Locus_23992.0|BlastHit|gi|41018011|sp|Q8BJU0.2|SGTA_MOUSE	6707	GO:0005737:cellular_component:cytoplasm	GO:0016032:biological_process:viral process
Locus_24022.0|BlastHit|gi|119370351|sp|Q9JLL0.2|CRIM1_MOUSE	6729	GO:0005576:cellular_component:extracellular region	GO:0045087:biological_process:innate immune response	GO:0001558:biological_process:regulation of cell growth
Locus_24029.0|BlastHit|gi|160395584|sp|Q7Q021.4|GLT25_ANOGA	6734	GO:0005788:cellular_component:endoplasmic reticulum lumen	GO:0016757:molecular_function:transferase activity, transferring glycosyl groups	GO:0009103:biological_process:lipopolysaccharide biosynthetic process
Locus_24090.0|BlastHit|gi|21263796|sp|Q9Z2Q5.2|RM40_MOUSE	6779	GO:0005761:cellular_component:mitochondrial ribosome	GO:0005739:cellular_component:mitochondrion	GO:0005730:cellular_component:nucleolus	GO:0044822:molecular_function:poly(A) RNA binding
Locus_24098.0|BlastHit|gi|2501006|sp|P70076.1|SYHC_TAKRU	6783	GO:0005737:cellular_component:cytoplasm	GO:0005524:molecular_function:ATP binding	GO:0004821:molecular_function:histidine-tRNA ligase activity	GO:0006427:biological_process:histidyl-tRNA aminoacylation
Locus_24119.0|BlastHit|gi|74848914|sp|Q9GV27.1|EIF3H_BOMMO	6796	GO:0016282:cellular_component:eukaryotic 43S preinitiation complex	GO:0033290:cellular_component:eukaryotic 48S preinitiation complex	GO:0005852:cellular_component:eukaryotic translation initiation factor 3 complex	GO:0003743:molecular_function:translation initiation factor activity	GO:0001731:biological_process:formation of translation preinitiation complex
Locus_24126.0|BlastHit|gi|251757329|sp|Q96T23.2|RSF1_HUMAN	6800	GO:0005654:cellular_component:nucleoplasm	GO:0005634:cellular_component:nucleus	GO:0031213:cellular_component:RSF complex	GO:0042393:molecular_function:histone binding	GO:0008270:molecular_function:zinc ion binding	GO:0034080:biological_process:CENP-A containing nucleosome assembly	GO:0006338:biological_process:chromatin remodeling	GO:0006352:biological_process:DNA-templated transcription, initiation	GO:0043392:biological_process:negative regulation of DNA binding	GO:0045892:biological_process:negative regulation of transcription, DNA-templated	GO:0006334:biological_process:nucleosome assembly	GO:0016584:biological_process:nucleosome positioning	GO:0045893:biological_process:positive regulation of transcription, DNA-templated	GO:0050434:biological_process:positive regulation of viral transcription
Locus_24133.0|BlastHit|gi|30581054|sp|P48601.2|PRS4_DROME	6807	GO:0005737:cellular_component:cytoplasm	GO:0005634:cellular_component:nucleus	GO:0005838:cellular_component:proteasome regulatory particle	GO:0008540:cellular_component:proteasome regulatory particle, base subcomplex	GO:0005524:molecular_function:ATP binding	GO:0016787:molecular_function:hydrolase activity	GO:0008283:biological_process:cell proliferation	GO:0009987:biological_process:cellular process	GO:0006974:biological_process:cellular response to DNA damage stimulus	GO:0000022:biological_process:mitotic spindle elongation	GO:0007052:biological_process:mitotic spindle organization	GO:0043161:biological_process:proteasome-mediated ubiquitin-dependent protein catabolic process	GO:0006508:biological_process:proteolysis	GO:0090307:biological_process:mitotic spindle assembly
Locus_24141.0|BlastHit|gi|71152389|sp|Q9CQF4.1|CF203_MOUSE	6812	GO:0005739:cellular_component:mitochondrion
Locus_24161.0|BlastHit|gi|52782766|sp|Q9Z336.1|DYLT1_RAT	6824	GO:0005868:cellular_component:cytoplasmic dynein complex	GO:0005794:cellular_component:Golgi apparatus	GO:0005874:cellular_component:microtubule	GO:0005819:cellular_component:spindle	GO:0003774:molecular_function:motor activity	GO:0000132:biological_process:establishment of mitotic spindle orientation	GO:0006886:biological_process:intracellular protein transport	GO:0019060:biological_process:intracellular transport of viral protein in host cell	GO:0007067:biological_process:mitotic nuclear division	GO:0050768:biological_process:negative regulation of neurogenesis	GO:0048812:biological_process:neuron projection morphogenesis	GO:0051493:biological_process:regulation of cytoskeleton organization	GO:0008277:biological_process:regulation of G-protein coupled receptor protein signaling pathway	GO:0032314:biological_process:regulation of Rac GTPase activity
Locus_24222.0|BlastHit|gi|325530038|sp|P0CL18.1|EIF2D_RABIT	6870	GO:0022627:cellular_component:cytosolic small ribosomal subunit	GO:0005634:cellular_component:nucleus	GO:0003743:molecular_function:translation initiation factor activity	GO:0001731:biological_process:formation of translation preinitiation complex	GO:0002192:biological_process:IRES-dependent translational initiation	GO:0032790:biological_process:ribosome disassembly
Locus_24244.0|BlastHit|gi|10720193|sp|Q92143.2|P53_XIPMA	6878	GO:0005737:cellular_component:cytoplasm	GO:0005634:cellular_component:nucleus	GO:0046872:molecular_function:metal ion binding	GO:0003700:molecular_function:sequence-specific DNA binding transcription factor activity	GO:0044212:molecular_function:transcription regulatory region DNA binding	GO:0006915:biological_process:apoptotic process	GO:0007049:biological_process:cell cycle	GO:0051262:biological_process:protein tetramerization	GO:0006351:biological_process:transcription, DNA-templated
Locus_24252.0|BlastHit|gi|399496|sp|Q01543.1|FLI1_HUMAN	6890	GO:0005634:cellular_component:nucleus	GO:0003682:molecular_function:chromatin binding	GO:0003677:molecular_function:DNA binding	GO:0000978:molecular_function:RNA polymerase II core promoter proximal region sequence-specific DNA binding	GO:0001077:molecular_function:RNA polymerase II core promoter proximal region sequence-specific DNA binding transcription factor activity involved in positive regulation of transcription	GO:0000980:molecular_function:RNA polymerase II distal enhancer sequence-specific DNA binding	GO:0000981:molecular_function:sequence-specific DNA binding RNA polymerase II transcription factor activity	GO:0003700:molecular_function:sequence-specific DNA binding transcription factor activity	GO:0008015:biological_process:blood circulation	GO:0030154:biological_process:cell differentiation	GO:0007599:biological_process:hemostasis	GO:0035855:biological_process:megakaryocyte development	GO:0009887:biological_process:organ morphogenesis	GO:0006357:biological_process:regulation of transcription from RNA polymerase II promoter	GO:0006366:biological_process:transcription from RNA polymerase II promoter
Locus_24263.0|BlastHit|gi|132171|sp|P23800.1|RCC1_MESAU	6902	GO:0005737:cellular_component:cytoplasm	GO:0005634:cellular_component:nucleus	GO:0005085:molecular_function:guanyl-nucleotide exchange factor activity	GO:0031492:molecular_function:nucleosomal DNA binding	GO:0007059:biological_process:chromosome segregation	GO:0007067:biological_process:mitotic nuclear division	GO:0051225:biological_process:spindle assembly
Locus_24273.0|BlastHit|gi|24211597|sp|Q9CQT9.1|CT024_MOUSE	6905	GO:0005739:cellular_component:mitochondrion
Locus_24286.0|BlastHit|gi|543797|sp|P07764.5|ALF_DROME	6917	GO:0031430:cellular_component:M band	GO:0030018:cellular_component:Z disc	GO:0004332:molecular_function:fructose-bisphosphate aldolase activity	GO:0006096:biological_process:glycolytic process	GO:0007498:biological_process:mesoderm development	GO:0007095:biological_process:mitotic G2 DNA damage checkpoint
Locus_24299.0|BlastHit|gi|269849749|sp|P00637.4|F16P1_RABIT	6921	GO:0005737:cellular_component:cytoplasm	GO:0005829:cellular_component:cytosol	GO:0016208:molecular_function:AMP binding	GO:0042132:molecular_function:fructose 1,6-bisphosphate 1-phosphatase activity	GO:0046872:molecular_function:metal ion binding	GO:0048029:molecular_function:monosaccharide binding	GO:0035690:biological_process:cellular response to drug	GO:0071286:biological_process:cellular response to magnesium ion	GO:0016311:biological_process:dephosphorylation	GO:0006002:biological_process:fructose 6-phosphate metabolic process	GO:0006094:biological_process:gluconeogenesis	GO:0030308:biological_process:negative regulation of cell growth	GO:0045820:biological_process:negative regulation of glycolytic process	GO:0046580:biological_process:negative regulation of Ras protein signal transduction	GO:0051289:biological_process:protein homotetramerization	GO:0006111:biological_process:regulation of gluconeogenesis
Locus_24299.0|BlastHit|gi|269849749|sp|P00637.4|F16P1_RABIT	6922	GO:0005737:cellular_component:cytoplasm	GO:0005829:cellular_component:cytosol	GO:0016208:molecular_function:AMP binding	GO:0042132:molecular_function:fructose 1,6-bisphosphate 1-phosphatase activity	GO:0046872:molecular_function:metal ion binding	GO:0048029:molecular_function:monosaccharide binding	GO:0035690:biological_process:cellular response to drug	GO:0071286:biological_process:cellular response to magnesium ion	GO:0016311:biological_process:dephosphorylation	GO:0006002:biological_process:fructose 6-phosphate metabolic process	GO:0006094:biological_process:gluconeogenesis	GO:0030308:biological_process:negative regulation of cell growth	GO:0045820:biological_process:negative regulation of glycolytic process	GO:0046580:biological_process:negative regulation of Ras protein signal transduction	GO:0051289:biological_process:protein homotetramerization	GO:0006111:biological_process:regulation of gluconeogenesis
Locus_24323.1|BlastHit|gi|41688588|sp|Q8VI75.1|IPO4_MOUSE	6940	GO:0005737:cellular_component:cytoplasm	GO:0016020:cellular_component:membrane	GO:0000790:cellular_component:nuclear chromatin	GO:0043234:cellular_component:protein complex	GO:0006335:biological_process:DNA replication-dependent nucleosome assembly	GO:0006336:biological_process:DNA replication-independent nucleosome assembly	GO:0006886:biological_process:intracellular protein transport	GO:0015031:biological_process:protein transport
Locus_24323.1|BlastHit|gi|41688588|sp|Q8VI75.1|IPO4_MOUSE	6941	GO:0005737:cellular_component:cytoplasm	GO:0016020:cellular_component:membrane	GO:0000790:cellular_component:nuclear chromatin	GO:0043234:cellular_component:protein complex	GO:0006335:biological_process:DNA replication-dependent nucleosome assembly	GO:0006336:biological_process:DNA replication-independent nucleosome assembly	GO:0006886:biological_process:intracellular protein transport	GO:0015031:biological_process:protein transport
Locus_24352.1|BlastHit|gi|193806339|sp|P41822.2|FRI_AEDAE	6955	GO:0005576:cellular_component:extracellular region	GO:0008199:molecular_function:ferric iron binding	GO:0004322:molecular_function:ferroxidase activity	GO:0006879:biological_process:cellular iron ion homeostasis	GO:0006826:biological_process:iron ion transport
Locus_24352.1|BlastHit|gi|193806339|sp|P41822.2|FRI_AEDAE	6956	GO:0005576:cellular_component:extracellular region	GO:0008199:molecular_function:ferric iron binding	GO:0004322:molecular_function:ferroxidase activity	GO:0006879:biological_process:cellular iron ion homeostasis	GO:0006826:biological_process:iron ion transport
Locus_24354.0|BlastHit|gi|122135715|sp|Q2HJ98.1|FAHD1_BOVIN	6959	GO:0005829:cellular_component:cytosol	GO:0005743:cellular_component:mitochondrial inner membrane	GO:0005739:cellular_component:mitochondrion	GO:0005634:cellular_component:nucleus	GO:0018773:molecular_function:acetylpyruvate hydrolase activity	GO:0047621:molecular_function:acylpyruvate hydrolase activity	GO:0034545:molecular_function:fumarylpyruvate hydrolase activity	GO:0046872:molecular_function:metal ion binding
Locus_24362.0|BlastHit|gi|172045785|sp|Q9N2J2.2|GPX4_BOVIN	6966	GO:0005737:cellular_component:cytoplasm	GO:0004602:molecular_function:glutathione peroxidase activity	GO:0047066:molecular_function:phospholipid-hydroperoxide glutathione peroxidase activity	GO:0006979:biological_process:response to oxidative stress
Locus_24362.0|BlastHit|gi|172045785|sp|Q9N2J2.2|GPX4_BOVIN	6966	GO:0009507:cellular_component:chloroplast	GO:0004602:molecular_function:glutathione peroxidase activity	GO:0080167:biological_process:response to karrikin	GO:0006979:biological_process:response to oxidative stress
Locus_24370.0|BlastHit|gi|116242689|sp|P11966.2|ODPB_BOVIN	6967	GO:0070062:cellular_component:extracellular vesicular exosome	GO:0005759:cellular_component:mitochondrial matrix	GO:0005634:cellular_component:nucleus	GO:0045254:cellular_component:pyruvate dehydrogenase complex	GO:0004739:molecular_function:pyruvate dehydrogenase (acetyl-transferring) activity	GO:0004738:molecular_function:pyruvate dehydrogenase activity	GO:0006086:biological_process:acetyl-CoA biosynthetic process from pyruvate	GO:0006006:biological_process:glucose metabolic process	GO:0006099:biological_process:tricarboxylic acid cycle
Locus_24379.0|BlastHit|gi|12229745|sp|O76071.1|CIAO1_HUMAN	6971	GO:0097361:cellular_component:CIA complex	GO:0071817:cellular_component:MMXD complex	GO:0007059:biological_process:chromosome segregation	GO:0016226:biological_process:iron-sulfur cluster assembly	GO:0008284:biological_process:positive regulation of cell proliferation	GO:0006357:biological_process:regulation of transcription from RNA polymerase II promoter	GO:0044281:biological_process:small molecule metabolic process
Locus_24398.0|BlastHit|gi|121993808|sp|Q29HY3.1|CDC42_DROPS	6988	GO:0005912:cellular_component:adherens junction	GO:0005622:cellular_component:intracellular	GO:0005886:cellular_component:plasma membrane	GO:0005525:molecular_function:GTP binding	GO:0045185:biological_process:maintenance of protein location	GO:0007275:biological_process:multicellular organismal development	GO:0045860:biological_process:positive regulation of protein kinase activity	GO:0007264:biological_process:small GTPase mediated signal transduction
Locus_24401.0|BlastHit|gi|13124116|sp|Q9WTS8.2|FCN1_RAT	6990	GO:0005581:cellular_component:collagen trimer	GO:0005576:cellular_component:extracellular region	GO:0031232:cellular_component:extrinsic component of external side of plasma membrane	GO:0030246:molecular_function:carbohydrate binding	GO:0046872:molecular_function:metal ion binding	GO:0008329:molecular_function:signaling pattern recognition receptor activity	GO:0002752:biological_process:cell surface pattern recognition receptor signaling pathway	GO:0007186:biological_process:G-protein coupled receptor signaling pathway	GO:0045087:biological_process:innate immune response	GO:2000484:biological_process:positive regulation of interleukin-8 secretion
Locus_24409.0|BlastHit|gi|209574317|sp|Q1MTN8.2|YGC1_SCHPO	6993	GO:0005730:cellular_component:nucleolus	GO:0005634:cellular_component:nucleus	GO:0043234:cellular_component:protein complex
Locus_24417.0|BlastHit|gi|18202162|sp|O76924.1|ARI2_DROME	6999	GO:0005634:cellular_component:nucleus	GO:0003676:molecular_function:nucleic acid binding	GO:0008270:molecular_function:zinc ion binding
Locus_24421.0|BlastHit|gi|166227295|sp|Q6P1N9.2|TATD1_HUMAN	7001	GO:0043229:cellular_component:intracellular organelle	GO:0005634:cellular_component:nucleus	GO:0004536:molecular_function:deoxyribonuclease activity	GO:0016888:molecular_function:endodeoxyribonuclease activity, producing 5'-phosphomonoesters	GO:0046872:molecular_function:metal ion binding	GO:0006308:biological_process:DNA catabolic process
Locus_24428.0|BlastHit|gi|13124554|sp|O44437.1|SMD3_DROME	7004	GO:0071013:cellular_component:catalytic step 2 spliceosome	GO:0045495:cellular_component:pole plasm	GO:0071011:cellular_component:precatalytic spliceosome	GO:0030532:cellular_component:small nuclear ribonucleoprotein complex	GO:0005681:cellular_component:spliceosomal complex	GO:0007417:biological_process:central nervous system development	GO:0048542:biological_process:lymph gland development	GO:0007067:biological_process:mitotic nuclear division	GO:0007052:biological_process:mitotic spindle organization	GO:0000398:biological_process:mRNA splicing, via spliceosome	GO:0007517:biological_process:muscle organ development	GO:0030182:biological_process:neuron differentiation	GO:0007422:biological_process:peripheral nervous system development	GO:0045451:biological_process:pole plasm oskar mRNA localization
Locus_24449.0|BlastHit|gi|50403748|sp|P55735.3|SEC13_HUMAN	7015	GO:0005829:cellular_component:cytosol	GO:0005789:cellular_component:endoplasmic reticulum membrane	GO:0012507:cellular_component:ER to Golgi transport vesicle membrane	GO:0070062:cellular_component:extracellular vesicular exosome	GO:0000139:cellular_component:Golgi membrane	GO:0005635:cellular_component:nuclear envelope	GO:0031080:cellular_component:nuclear pore outer ring	GO:0019886:biological_process:antigen processing and presentation of exogenous peptide antigen via MHC class II	GO:0002474:biological_process:antigen processing and presentation of peptide antigen via MHC class I	GO:0044267:biological_process:cellular protein metabolic process	GO:0048208:biological_process:COPII vesicle coating	GO:0006888:biological_process:ER to Golgi vesicle-mediated transport	GO:0006886:biological_process:intracellular protein transport	GO:0061024:biological_process:membrane organization	GO:0000278:biological_process:mitotic cell cycle	GO:0051028:biological_process:mRNA transport	GO:0043687:biological_process:post-translational protein modification	GO:0018279:biological_process:protein N-linked glycosylation via asparagine
Locus_24452.0|BlastHit|gi|110278814|sp|Q3ZC89.1|AMPM2_BOVIN	7016	GO:0005737:cellular_component:cytoplasm	GO:0005886:cellular_component:plasma membrane	GO:0004177:molecular_function:aminopeptidase activity	GO:0046872:molecular_function:metal ion binding	GO:0070006:molecular_function:metalloaminopeptidase activity	GO:0008235:molecular_function:metalloexopeptidase activity	GO:0044822:molecular_function:poly(A) RNA binding	GO:0031365:biological_process:N-terminal protein amino acid modification	GO:0018206:biological_process:peptidyl-methionine modification	GO:0070084:biological_process:protein initiator methionine removal	GO:0016485:biological_process:protein processing
Locus_24454.0|BlastHit|gi|294862526|sp|Q2KJC9.4|AL7A1_BOVIN	7017	GO:0005829:cellular_component:cytosol	GO:0005739:cellular_component:mitochondrion	GO:0005634:cellular_component:nucleus	GO:0008802:molecular_function:betaine-aldehyde dehydrogenase activity	GO:0004043:molecular_function:L-aminoadipate-semialdehyde dehydrogenase activity	GO:0019285:biological_process:glycine betaine biosynthetic process from choline
Locus_24456.0|BlastHit|gi|71153717|sp|Q9VKB4.1|RPF1_DROME	7018	GO:0005730:cellular_component:nucleolus	GO:0003723:molecular_function:RNA binding	GO:0019843:molecular_function:rRNA binding	GO:0006364:biological_process:rRNA processing
Locus_24471.0|BlastHit|gi|75075711|sp|Q4R4I6.3|CAP1_MACFA	7041	GO:0030864:cellular_component:cortical actin cytoskeleton	GO:0070062:cellular_component:extracellular vesicular exosome	GO:0005925:cellular_component:focal adhesion	GO:0005886:cellular_component:plasma membrane	GO:0030036:biological_process:actin cytoskeleton organization	GO:0007190:biological_process:activation of adenylate cyclase activity	GO:0001667:biological_process:ameboidal-type cell migration	GO:0007411:biological_process:axon guidance	GO:0007596:biological_process:blood coagulation	GO:0007163:biological_process:establishment or maintenance of cell polarity	GO:0030168:biological_process:platelet activation	GO:0002576:biological_process:platelet degranulation	GO:0006898:biological_process:receptor-mediated endocytosis	GO:0007165:biological_process:signal transduction
Locus_24473.0|BlastHit|gi|50401156|sp|Q9D1I5.1|MCEE_MOUSE	7043	GO:0005739:cellular_component:mitochondrion	GO:0046872:molecular_function:metal ion binding	GO:0004493:molecular_function:methylmalonyl-CoA epimerase activity	GO:0046491:biological_process:L-methylmalonyl-CoA metabolic process
Locus_24486.0|BlastHit|gi|10720068|sp|Q9V447.1|KRH2_DROME	7047	GO:0012505:cellular_component:endomembrane system	GO:0016021:cellular_component:integral component of membrane
Locus_24489.0|BlastHit|gi|81910895|sp|Q6AYL5.1|SF3B4_RAT	7049	GO:0005689:cellular_component:U12-type spliceosomal complex	GO:0000166:molecular_function:nucleotide binding	GO:0044822:molecular_function:poly(A) RNA binding	GO:0006397:biological_process:mRNA processing	GO:0008380:biological_process:RNA splicing
Locus_24490.0|BlastHit|gi|41688711|sp|Q8MS27.1|RM35_DROME	7050	GO:0005762:cellular_component:mitochondrial large ribosomal subunit	GO:0003735:molecular_function:structural constituent of ribosome	GO:0060429:biological_process:epithelium development	GO:0030727:biological_process:germarium-derived female germ-line cyst formation	GO:0006412:biological_process:translation
Locus_24494.0|BlastHit|gi|73621181|sp|Q9EQZ5.1|PTGR1_CAVPO	7055	GO:0005737:cellular_component:cytoplasm	GO:0036132:molecular_function:13-prostaglandin reductase activity	GO:0047522:molecular_function:15-oxoprostaglandin 13-oxidase activity	GO:0032440:molecular_function:2-alkenal reductase [NAD(P)] activity	GO:0008270:molecular_function:zinc ion binding
Locus_24509.0|BlastHit|gi|73919440|sp|Q5M8Y1.1|SPCS2_XENTR	7061	GO:0016021:cellular_component:integral component of membrane	GO:0005787:cellular_component:signal peptidase complex	GO:0008233:molecular_function:peptidase activity	GO:0006465:biological_process:signal peptide processing
Locus_24529.0|BlastHit|gi|170652901|sp|Q5TC12.1|ATPF1_HUMAN	7071	GO:0005739:cellular_component:mitochondrion	GO:0006461:biological_process:protein complex assembly
Locus_24578.0|BlastHit|gi|68565914|sp|Q8R2U6.1|NUDT4_MOUSE	7103	GO:0005737:cellular_component:cytoplasm	GO:0008486:molecular_function:diphosphoinositol-polyphosphate diphosphatase activity	GO:0052840:molecular_function:inositol diphosphate tetrakisphosphate diphosphatase activity	GO:0052846:molecular_function:inositol-1,5-bisdiphosphate-2,3,4,6-tetrakisphosphate 1-diphosphatase activity	GO:0052847:molecular_function:inositol-1,5-bisdiphosphate-2,3,4,6-tetrakisphosphate 5-diphosphatase activity	GO:0052843:molecular_function:inositol-1-diphosphate-2,3,4,5,6-pentakisphosphate diphosphatase activity	GO:0052848:molecular_function:inositol-3,5-bisdiphosphate-2,3,4,6-tetrakisphosphate 5-diphosphatase activity	GO:0052844:molecular_function:inositol-3-diphosphate-1,2,4,5,6-pentakisphosphate diphosphatase activity	GO:0052845:molecular_function:inositol-5-diphosphate-1,2,3,4,6-pentakisphosphate diphosphatase activity	GO:0046872:molecular_function:metal ion binding	GO:0030515:molecular_function:snoRNA binding
Locus_24581.0|BlastHit|gi|172048656|sp|A8YXY3.2|SEP15_BOVIN	7106	GO:0005788:cellular_component:endoplasmic reticulum lumen
Locus_24583.0|BlastHit|gi|31340522|sp|P36241.2|RL19_DROME	7108	GO:0005840:cellular_component:ribosome	GO:0003735:molecular_function:structural constituent of ribosome	GO:0051298:biological_process:centrosome duplication	GO:0000022:biological_process:mitotic spindle elongation	GO:0006412:biological_process:translation
Locus_24592.0|BlastHit|gi|73917752|sp|Q5XGW6.1|CHM4B_XENLA	7119	GO:0005829:cellular_component:cytosol	GO:0031902:cellular_component:late endosome membrane	GO:0015031:biological_process:protein transport
Locus_24630.0|BlastHit|gi|12585496|sp|Q9U516.1|ASTER_MANSE	7146	GO:0016021:cellular_component:integral component of membrane
Locus_24632.0|BlastHit|gi|74921277|sp|Q7QB13.2|CCNC_ANOGA	7147	GO:0016591:cellular_component:DNA-directed RNA polymerase II, holoenzyme	GO:0000079:biological_process:regulation of cyclin-dependent protein serine/threonine kinase activity	GO:0006355:biological_process:regulation of transcription, DNA-templated	GO:0006351:biological_process:transcription, DNA-templated
Locus_24639.0|BlastHit|gi|75026432|sp|Q9V7U0.1|RESIL_DROME	7156	GO:0031012:cellular_component:extracellular matrix	GO:0005576:cellular_component:extracellular region	GO:0032992:cellular_component:protein-carbohydrate complex	GO:0008061:molecular_function:chitin binding	GO:0030023:molecular_function:extracellular matrix constituent conferring elasticity	GO:0008010:molecular_function:structural constituent of chitin-based larval cuticle	GO:0042302:molecular_function:structural constituent of cuticle	GO:0040003:biological_process:chitin-based cuticle development
Locus_24639.0|BlastHit|gi|75026432|sp|Q9V7U0.1|RESIL_DROME	7157	GO:0031012:cellular_component:extracellular matrix	GO:0005576:cellular_component:extracellular region	GO:0032992:cellular_component:protein-carbohydrate complex	GO:0008061:molecular_function:chitin binding	GO:0030023:molecular_function:extracellular matrix constituent conferring elasticity	GO:0008010:molecular_function:structural constituent of chitin-based larval cuticle	GO:0042302:molecular_function:structural constituent of cuticle	GO:0040003:biological_process:chitin-based cuticle development
Locus_24659.0|BlastHit|gi|108884834|sp|Q13895.3|BYST_HUMAN	7169	GO:0045177:cellular_component:apical part of cell	GO:0005737:cellular_component:cytoplasm	GO:0016020:cellular_component:membrane	GO:0005730:cellular_component:nucleolus	GO:0044822:molecular_function:poly(A) RNA binding	GO:0008283:biological_process:cell proliferation	GO:0000462:biological_process:maturation of SSU-rRNA from tricistronic rRNA transcript (SSU-rRNA, 5.8S rRNA, LSU-rRNA)	GO:0001829:biological_process:trophectodermal cell differentiation
Locus_24663.0|BlastHit|gi|74872369|sp|Q9W2H1.1|TM2D1_DROME	7172	GO:0016021:cellular_component:integral component of membrane
Locus_24668.0|BlastHit|gi|46577123|sp|Q9GZU8.1|F192A_HUMAN	7173	GO:0005634:cellular_component:nucleus
Locus_24681.0|BlastHit|gi|21542002|sp|Q24740.1|CDC37_DROVI	7180	GO:0005737:cellular_component:cytoplasm
Locus_24683.0|BlastHit|gi|32129447|sp|Q99LM2.1|CK5P3_MOUSE	7181	GO:0045944:biological_process:positive regulation of transcription from RNA polymerase II promoter	GO:0071569:biological_process:protein ufmylation	GO:0000079:biological_process:regulation of cyclin-dependent protein serine/threonine kinase activity
Locus_24749.1|BlastHit|gi|78099248|sp|Q4V8Y6.1|ERGI1_DANRE	7220	GO:0005789:cellular_component:endoplasmic reticulum membrane	GO:0033116:cellular_component:endoplasmic reticulum-Golgi intermediate compartment membrane	GO:0000139:cellular_component:Golgi membrane	GO:0016021:cellular_component:integral component of membrane	GO:0016192:biological_process:vesicle-mediated transport
Locus_24783.0|BlastHit|gi|82176771|sp|Q7ZYA2.1|TAF8_XENLA	7242	GO:0005737:cellular_component:cytoplasm	GO:0005634:cellular_component:nucleus	GO:0030154:biological_process:cell differentiation	GO:0007275:biological_process:multicellular organismal development	GO:0006355:biological_process:regulation of transcription, DNA-templated	GO:0006351:biological_process:transcription, DNA-templated
Locus_24789.0|BlastHit|gi|18202518|sp|Q23983.1|SNAP_DROME	7245	GO:0043679:cellular_component:axon terminus	GO:0005737:cellular_component:cytoplasm	GO:0016023:cellular_component:cytoplasmic membrane-bounded vesicle	GO:0031410:cellular_component:cytoplasmic vesicle	GO:0016020:cellular_component:membrane	GO:0043195:cellular_component:terminal bouton	GO:0000149:molecular_function:SNARE binding	GO:0005483:molecular_function:soluble NSF attachment protein activity	GO:0001745:biological_process:compound eye morphogenesis	GO:0048526:biological_process:imaginal disc-derived wing expansion	GO:0006891:biological_process:intra-Golgi vesicle-mediated transport	GO:0006886:biological_process:intracellular protein transport	GO:0000281:biological_process:mitotic cytokinesis	GO:0007274:biological_process:neuromuscular synaptic transmission	GO:0048812:biological_process:neuron projection morphogenesis	GO:0007269:biological_process:neurotransmitter secretion	GO:0006909:biological_process:phagocytosis	GO:0035540:biological_process:positive regulation of SNARE complex disassembly	GO:0007268:biological_process:synaptic transmission	GO:0031629:biological_process:synaptic vesicle fusion to presynaptic membrane	GO:0016082:biological_process:synaptic vesicle priming
Locus_24789.0|BlastHit|gi|18202518|sp|Q23983.1|SNAP_DROME	7246	GO:0043679:cellular_component:axon terminus	GO:0005737:cellular_component:cytoplasm	GO:0016023:cellular_component:cytoplasmic membrane-bounded vesicle	GO:0031410:cellular_component:cytoplasmic vesicle	GO:0016020:cellular_component:membrane	GO:0043195:cellular_component:terminal bouton	GO:0000149:molecular_function:SNARE binding	GO:0005483:molecular_function:soluble NSF attachment protein activity	GO:0001745:biological_process:compound eye morphogenesis	GO:0048526:biological_process:imaginal disc-derived wing expansion	GO:0006891:biological_process:intra-Golgi vesicle-mediated transport	GO:0006886:biological_process:intracellular protein transport	GO:0000281:biological_process:mitotic cytokinesis	GO:0007274:biological_process:neuromuscular synaptic transmission	GO:0048812:biological_process:neuron projection morphogenesis	GO:0007269:biological_process:neurotransmitter secretion	GO:0006909:biological_process:phagocytosis	GO:0035540:biological_process:positive regulation of SNARE complex disassembly	GO:0007268:biological_process:synaptic transmission	GO:0031629:biological_process:synaptic vesicle fusion to presynaptic membrane	GO:0016082:biological_process:synaptic vesicle priming
Locus_24798.0|BlastHit|gi|126986|sp|P20108.1|PRDX3_MOUSE	7252	GO:0005769:cellular_component:early endosome	GO:0070062:cellular_component:extracellular vesicular exosome	GO:0008385:cellular_component:IkappaB kinase complex	GO:0005739:cellular_component:mitochondrion	GO:0043027:molecular_function:cysteine-type endopeptidase inhibitor activity involved in apoptotic process	GO:0042802:molecular_function:identical protein binding	GO:0008379:molecular_function:thioredoxin peroxidase activity	GO:0042744:biological_process:hydrogen peroxide catabolic process	GO:0001893:biological_process:maternal placenta development	GO:0007005:biological_process:mitochondrion organization	GO:0030099:biological_process:myeloid cell differentiation	GO:0033673:biological_process:negative regulation of kinase activity	GO:0018171:biological_process:peptidyl-cysteine oxidation	GO:0008284:biological_process:positive regulation of cell proliferation	GO:0051092:biological_process:positive regulation of NF-kappaB transcription factor activity	GO:0051881:biological_process:regulation of mitochondrial membrane potential	GO:0032496:biological_process:response to lipopolysaccharide	GO:0006979:biological_process:response to oxidative stress
Locus_24811.0|BlastHit|gi|74750895|sp|Q8N1G4.1|LRC47_HUMAN	7264	GO:0004826:molecular_function:phenylalanine-tRNA ligase activity	GO:0003723:molecular_function:RNA binding
Locus_24812.0|BlastHit|gi|62287121|sp|Q99MZ7.1|PECR_MOUSE	7265	GO:0043231:cellular_component:intracellular membrane-bounded organelle	GO:0005739:cellular_component:mitochondrion	GO:0005778:cellular_component:peroxisomal membrane	GO:0005777:cellular_component:peroxisome	GO:0005102:molecular_function:receptor binding	GO:0019166:molecular_function:trans-2-enoyl-CoA reductase (NADPH) activity	GO:0006633:biological_process:fatty acid biosynthetic process	GO:0055114:biological_process:oxidation-reduction process	GO:0033306:biological_process:phytol metabolic process
Locus_24853.0|BlastHit|gi|38372288|sp|P92204.1|NELFE_DROME	7282	GO:0005694:cellular_component:chromosome	GO:0032021:cellular_component:NELF complex	GO:0005634:cellular_component:nucleus	GO:0008023:cellular_component:transcription elongation factor complex	GO:0017053:cellular_component:transcriptional repressor complex	GO:0003729:molecular_function:mRNA binding	GO:0000166:molecular_function:nucleotide binding	GO:0003723:molecular_function:RNA binding	GO:0032785:biological_process:negative regulation of DNA-templated transcription, elongation	GO:0034244:biological_process:negative regulation of transcription elongation from RNA polymerase II promoter	GO:0000122:biological_process:negative regulation of transcription from RNA polymerase II promoter	GO:0007070:biological_process:negative regulation of transcription from RNA polymerase II promoter during mitosis	GO:0022008:biological_process:neurogenesis	GO:0045944:biological_process:positive regulation of transcription from RNA polymerase II promoter	GO:0006368:biological_process:transcription elongation from RNA polymerase II promoter
Locus_24874.0|BlastHit|gi|62900713|sp|Q9VJQ5.1|NC2B_DROME	7292	GO:0005671:cellular_component:Ada2/Gcn5/Ada3 transcription activator complex	GO:0005634:cellular_component:nucleus	GO:0043565:molecular_function:sequence-specific DNA binding	GO:0008134:molecular_function:transcription factor binding	GO:0006338:biological_process:chromatin remodeling	GO:0016573:biological_process:histone acetylation	GO:0000122:biological_process:negative regulation of transcription from RNA polymerase II promoter	GO:0045892:biological_process:negative regulation of transcription, DNA-templated	GO:0042766:biological_process:nucleosome mobilization	GO:0045944:biological_process:positive regulation of transcription from RNA polymerase II promoter	GO:0045893:biological_process:positive regulation of transcription, DNA-templated	GO:0051123:biological_process:RNA polymerase II transcriptional preinitiation complex assembly
Locus_24896.0|BlastHit|gi|7676152|sp|P12310.2|DHG_BACSU	7300	GO:0047936:molecular_function:glucose 1-dehydrogenase [NAD(P)] activity	GO:0030435:biological_process:sporulation resulting in formation of a cellular spore
Locus_24899.0|BlastHit|gi|47117660|sp|P61209.2|ARF1_DROME	7301	GO:0005794:cellular_component:Golgi apparatus	GO:0005525:molecular_function:GTP binding	GO:0015031:biological_process:protein transport	GO:0007264:biological_process:small GTPase mediated signal transduction	GO:0016192:biological_process:vesicle-mediated transport
Locus_24936.0|BlastHit|gi|2498392|sp|Q62632.1|FSTL1_RAT	7316	GO:0005576:cellular_component:extracellular region	GO:0005509:molecular_function:calcium ion binding	GO:0008201:molecular_function:heparin binding
Locus_24953.0|BlastHit|gi|38258607|sp|Q8IH24.2|MED31_DROME	7322	GO:0008234:molecular_function:cysteine-type peptidase activity
Locus_24953.0|BlastHit|gi|38258607|sp|Q8IH24.2|MED31_DROME	7322	GO:0016592:cellular_component:mediator complex	GO:0005634:cellular_component:nucleus	GO:0001104:molecular_function:RNA polymerase II transcription cofactor activity	GO:0008595:biological_process:anterior/posterior axis specification, embryo	GO:0006357:biological_process:regulation of transcription from RNA polymerase II promoter	GO:0006367:biological_process:transcription initiation from RNA polymerase II promoter
Locus_24958.0|BlastHit|gi|62511114|sp|Q7TNE3.1|SPAG7_MOUSE	7325	GO:0005634:cellular_component:nucleus	GO:0003676:molecular_function:nucleic acid binding
Locus_24982.1|BlastHit|gi|232285|sp|P08108.2|HSP70_ONCMY	7351	GO:0004352:molecular_function:glutamate dehydrogenase (NAD+) activity
Locus_24982.1|BlastHit|gi|232285|sp|P08108.2|HSP70_ONCMY	7351	GO:0005524:molecular_function:ATP binding
Locus_25004.1|BlastHit|gi|91207411|sp|Q3TXS7.1|PSMD1_MOUSE	7379	GO:0005839:cellular_component:proteasome core complex	GO:0005838:cellular_component:proteasome regulatory particle	GO:0008540:cellular_component:proteasome regulatory particle, base subcomplex	GO:0030234:molecular_function:enzyme regulator activity	GO:0006974:biological_process:cellular response to DNA damage stimulus	GO:0043161:biological_process:proteasome-mediated ubiquitin-dependent protein catabolic process	GO:0006508:biological_process:proteolysis	GO:0042176:biological_process:regulation of protein catabolic process
Locus_25004.1|BlastHit|gi|91207411|sp|Q3TXS7.1|PSMD1_MOUSE	7379	GO:0016787:molecular_function:hydrolase activity	GO:0046872:molecular_function:metal ion binding
Locus_25036.0|BlastHit|gi|82181398|sp|Q66JG5.1|TADA3_XENTR	7402	GO:0005634:cellular_component:nucleus	GO:0006355:biological_process:regulation of transcription, DNA-templated	GO:0006351:biological_process:transcription, DNA-templated
Locus_25051.0|BlastHit|gi|3024356|sp|P81057.1|PEN2A_LITVA	7421	GO:0005737:cellular_component:cytoplasm	GO:0008061:molecular_function:chitin binding	GO:0042742:biological_process:defense response to bacterium	GO:0050832:biological_process:defense response to fungus	GO:0031640:biological_process:killing of cells of other organism
Locus_25051.0|BlastHit|gi|3024418|sp|P81060.1|PEN3C_LITVA	7418	GO:0005737:cellular_component:cytoplasm	GO:0008061:molecular_function:chitin binding	GO:0042742:biological_process:defense response to bacterium	GO:0050832:biological_process:defense response to fungus	GO:0031640:biological_process:killing of cells of other organism
Locus_25067.0|BlastHit|gi|464608|sp|P35244.1|RFA3_HUMAN	7459	GO:0005662:cellular_component:DNA replication factor A complex	GO:0005654:cellular_component:nucleoplasm	GO:0003684:molecular_function:damaged DNA binding	GO:0003697:molecular_function:single-stranded DNA binding	GO:0006284:biological_process:base-excision repair	GO:0000730:biological_process:DNA recombinase assembly	GO:0006281:biological_process:DNA repair	GO:0006260:biological_process:DNA replication	GO:0006271:biological_process:DNA strand elongation involved in DNA replication	GO:0006302:biological_process:double-strand break repair	GO:0000724:biological_process:double-strand break repair via homologous recombination	GO:0000082:biological_process:G1/S transition of mitotic cell cycle	GO:0006298:biological_process:mismatch repair	GO:0000278:biological_process:mitotic cell cycle	GO:0006289:biological_process:nucleotide-excision repair	GO:0000718:biological_process:nucleotide-excision repair, DNA damage removal	GO:0006297:biological_process:nucleotide-excision repair, DNA gap filling	GO:0042127:biological_process:regulation of cell proliferation	GO:0007346:biological_process:regulation of mitotic cell cycle	GO:0000723:biological_process:telomere maintenance	GO:0000722:biological_process:telomere maintenance via recombination	GO:0032201:biological_process:telomere maintenance via semi-conservative replication	GO:0006283:biological_process:transcription-coupled nucleotide-excision repair
Locus_25069.0|BlastHit|gi|73621844|sp|Q9DBE9.1|RRMJ3_MOUSE	7461	GO:0005730:cellular_component:nucleolus	GO:0030688:cellular_component:preribosome, small subunit precursor	GO:0044822:molecular_function:poly(A) RNA binding	GO:0008649:molecular_function:rRNA methyltransferase activity	GO:0000453:biological_process:enzyme-directed rRNA 2'-O-methylation
Locus_25120.0|BlastHit|gi|109917954|sp|Q2M2S8.1|ALKB7_BOVIN	7505	GO:0005759:cellular_component:mitochondrial matrix	GO:0051213:molecular_function:dioxygenase activity	GO:0046872:molecular_function:metal ion binding	GO:0006974:biological_process:cellular response to DNA damage stimulus	GO:0006631:biological_process:fatty acid metabolic process	GO:0010883:biological_process:regulation of lipid storage	GO:1902445:biological_process:regulation of mitochondrial membrane permeability involved in programmed necrotic cell death
Locus_25143.0|BlastHit|gi|82182030|sp|Q6AZN4.1|RM15_XENLA	7542	GO:0015934:cellular_component:large ribosomal subunit	GO:0005739:cellular_component:mitochondrion	GO:0003735:molecular_function:structural constituent of ribosome	GO:0006412:biological_process:translation
Locus_25170.0|BlastHit|gi|73620960|sp|Q24324.2|DSOR1_DROME	7556	GO:0005524:molecular_function:ATP binding	GO:0004708:molecular_function:MAP kinase kinase activity	GO:0004713:molecular_function:protein tyrosine kinase activity	GO:0004702:molecular_function:receptor signaling protein serine/threonine kinase activity	GO:0000187:biological_process:activation of MAPK activity	GO:0008595:biological_process:anterior/posterior axis specification, embryo	GO:0007298:biological_process:border follicle cell migration	GO:0042386:biological_process:hemocyte differentiation	GO:0000165:biological_process:MAPK cascade	GO:0070374:biological_process:positive regulation of ERK1 and ERK2 cascade	GO:0046579:biological_process:positive regulation of Ras protein signal transduction	GO:0006468:biological_process:protein phosphorylation	GO:0007165:biological_process:signal transduction	GO:0007362:biological_process:terminal region determination
Locus_25172.0|BlastHit|gi|30580379|sp|Q9NP79.1|VTA1_HUMAN	7557	GO:0010008:cellular_component:endosome membrane	GO:0015031:biological_process:protein transport
Locus_25193.0|BlastHit|gi|10720057|sp|Q9VAS7.1|INX3_DROME	7572	GO:0016327:cellular_component:apicolateral plasma membrane	GO:0005737:cellular_component:cytoplasm	GO:0005921:cellular_component:gap junction	GO:0016021:cellular_component:integral component of membrane	GO:0016328:cellular_component:lateral plasma membrane	GO:0005886:cellular_component:plasma membrane	GO:0005243:molecular_function:gap junction channel activity	GO:0007391:biological_process:dorsal closure	GO:0010496:biological_process:intercellular transport	GO:0006811:biological_process:ion transport	GO:0055085:biological_process:transmembrane transport
Locus_25200.0|BlastHit|gi|187471142|sp|A7RT29.1|HBXIP_NEMVE	7576	GO:0005764:cellular_component:lysosome	GO:0071986:cellular_component:Ragulator complex	GO:0071230:biological_process:cellular response to amino acid stimulus	GO:0043154:biological_process:negative regulation of cysteine-type endopeptidase activity involved in apoptotic process	GO:0043547:biological_process:positive regulation of GTPase activity	GO:0032008:biological_process:positive regulation of TOR signaling	GO:0061462:biological_process:protein localization to lysosome	GO:0008361:biological_process:regulation of cell size	GO:0019079:biological_process:viral genome replication
Locus_25205.1|BlastHit|gi|166223489|sp|Q5ZL33.2|STRAP_CHICK	7578	GO:0030054:cellular_component:cell junction	GO:0005829:cellular_component:cytosol	GO:0005634:cellular_component:nucleus	GO:0005886:cellular_component:plasma membrane	GO:0032797:cellular_component:SMN complex	GO:0034719:cellular_component:SMN-Sm protein complex	GO:0044822:molecular_function:poly(A) RNA binding	GO:0005102:molecular_function:receptor binding	GO:0030277:biological_process:maintenance of gastrointestinal epithelium	GO:0010633:biological_process:negative regulation of epithelial cell migration	GO:0050680:biological_process:negative regulation of epithelial cell proliferation	GO:0010719:biological_process:negative regulation of epithelial to mesenchymal transition	GO:0060394:biological_process:negative regulation of pathway-restricted SMAD protein phosphorylation	GO:0000122:biological_process:negative regulation of transcription from RNA polymerase II promoter	GO:0030512:biological_process:negative regulation of transforming growth factor beta receptor signaling pathway	GO:0000387:biological_process:spliceosomal snRNP assembly
Locus_25239.0|BlastHit|gi|82181458|sp|Q66KB9.1|BL1S2_XENTR	7599	GO:0031083:cellular_component:BLOC-1 complex	GO:0042803:molecular_function:protein homodimerization activity
Locus_25253.0|BlastHit|gi|81900425|sp|Q8CHP8.1|PGP_MOUSE	7607	GO:0000287:molecular_function:magnesium ion binding	GO:0098519:molecular_function:nucleotide phosphatase activity, acting on free nucleotides	GO:0008967:molecular_function:phosphoglycolate phosphatase activity	GO:0004725:molecular_function:protein tyrosine phosphatase activity	GO:0005975:biological_process:carbohydrate metabolic process	GO:0016311:biological_process:dephosphorylation	GO:0035335:biological_process:peptidyl-tyrosine dephosphorylation
Locus_25296.0|BlastHit|gi|1703311|sp|P52183.1|ANNU_SCHAM	7631	GO:0005886:cellular_component:plasma membrane	GO:0046872:molecular_function:metal ion binding	GO:0003810:molecular_function:protein-glutamine gamma-glutamyltransferase activity	GO:0018149:biological_process:peptide cross-linking
Locus_25299.0|BlastHit|gi|74868572|sp|Q9VE04.1|RM55_DROME	7634	GO:0005762:cellular_component:mitochondrial large ribosomal subunit	GO:0005739:cellular_component:mitochondrion	GO:0003735:molecular_function:structural constituent of ribosome	GO:0007275:biological_process:multicellular organismal development	GO:0006412:biological_process:translation
Locus_25301.0|BlastHit|gi|122056017|sp|Q3SZZ0.1|BRX1_BOVIN	7635	GO:0005730:cellular_component:nucleolus	GO:0044822:molecular_function:poly(A) RNA binding	GO:0042254:biological_process:ribosome biogenesis
Locus_25316.0|BlastHit|gi|121993358|sp|Q29GB8.1|NAAT1_DROPS	7647	GO:0005887:cellular_component:integral component of plasma membrane	GO:0042943:molecular_function:D-amino acid transmembrane transporter activity	GO:0005328:molecular_function:neurotransmitter:sodium symporter activity	GO:0015175:molecular_function:neutral amino acid transmembrane transporter activity	GO:0005283:molecular_function:sodium:amino acid symporter activity	GO:0003333:biological_process:amino acid transmembrane transport	GO:0042940:biological_process:D-amino acid transport	GO:0015804:biological_process:neutral amino acid transport	GO:0006814:biological_process:sodium ion transport
Locus_25321.0|BlastHit|gi|75075675|sp|Q4R4E1.1|PIGM_MACFA	7651	GO:0005789:cellular_component:endoplasmic reticulum membrane	GO:0016021:cellular_component:integral component of membrane	GO:0000030:molecular_function:mannosyltransferase activity	GO:0006506:biological_process:GPI anchor biosynthetic process	GO:0097502:biological_process:mannosylation
Locus_25321.0|BlastHit|gi|75075675|sp|Q4R4E1.1|PIGM_MACFA	7651	GO:0005739:cellular_component:mitochondrion	GO:0008283:biological_process:cell proliferation
Locus_25323.0|BlastHit|gi|341941234|sp|Q99PJ1.2|PCD15_MOUSE	7653	GO:0005737:cellular_component:cytoplasm	GO:0005576:cellular_component:extracellular region	GO:0016021:cellular_component:integral component of membrane	GO:0001750:cellular_component:photoreceptor outer segment	GO:0005886:cellular_component:plasma membrane	GO:0032420:cellular_component:stereocilium	GO:0005509:molecular_function:calcium ion binding	GO:0007015:biological_process:actin filament organization	GO:0007628:biological_process:adult walking behavior	GO:0042491:biological_process:auditory receptor cell differentiation	GO:0060088:biological_process:auditory receptor cell stereocilium organization	GO:0050973:biological_process:detection of mechanical stimulus involved in equilibrioception	GO:0050910:biological_process:detection of mechanical stimulus involved in sensory perception of sound	GO:0007156:biological_process:homophilic cell adhesion via plasma membrane adhesion molecules	GO:0048839:biological_process:inner ear development	GO:0007626:biological_process:locomotory behavior	GO:0002009:biological_process:morphogenesis of an epithelium	GO:0035264:biological_process:multicellular organism growth	GO:0035058:biological_process:nonmotile primary cilium assembly	GO:0060013:biological_process:righting reflex	GO:0007605:biological_process:sensory perception of sound	GO:0001964:biological_process:startle response	GO:0007601:biological_process:visual perception
Locus_25327.0|BlastHit|gi|81883542|sp|Q5U317.1|FIP1_RAT	7654	GO:0005847:cellular_component:mRNA cleavage and polyadenylation specificity factor complex	GO:0044822:molecular_function:poly(A) RNA binding	GO:0006397:biological_process:mRNA processing
Locus_25345.0|BlastHit|gi|166215193|sp|Q3TAS6.2|INM02_MOUSE	7668	GO:0072546:cellular_component:ER membrane protein complex	GO:0005576:cellular_component:extracellular region	GO:0016021:cellular_component:integral component of membrane
Locus_25346.0|BlastHit|gi|17368331|sp|P82968.1|MCPI_MELCP	7669	GO:0004867:molecular_function:serine-type endopeptidase inhibitor activity
Locus_25398.0|BlastHit|gi|187608833|sp|Q99MD6.2|TRXR3_MOUSE	7701	GO:0005783:cellular_component:endoplasmic reticulum	GO:0005634:cellular_component:nucleus	GO:0009055:molecular_function:electron carrier activity	GO:0050660:molecular_function:flavin adenine dinucleotide binding	GO:0050661:molecular_function:NADP binding	GO:0015035:molecular_function:protein disulfide oxidoreductase activity	GO:0004791:molecular_function:thioredoxin-disulfide reductase activity	GO:0030154:biological_process:cell differentiation	GO:0045454:biological_process:cell redox homeostasis	GO:0006749:biological_process:glutathione metabolic process	GO:0007275:biological_process:multicellular organismal development	GO:0007283:biological_process:spermatogenesis
Locus_25400.0|BlastHit|gi|1350593|sp|P48148.1|RHO1_DROME	7703	GO:0045179:cellular_component:apical cortex	GO:0005938:cellular_component:cell cortex	GO:0070451:cellular_component:cell hair	GO:0005737:cellular_component:cytoplasm	GO:0005856:cellular_component:cytoskeleton	GO:0005886:cellular_component:plasma membrane	GO:0005525:molecular_function:GTP binding	GO:0003924:molecular_function:GTPase activity	GO:0019900:molecular_function:kinase binding	GO:0030036:biological_process:actin cytoskeleton organization	GO:0031532:biological_process:actin cytoskeleton reorganization	GO:0051017:biological_process:actin filament bundle assembly	GO:0007015:biological_process:actin filament organization	GO:0070252:biological_process:actin-mediated cell contraction	GO:0007411:biological_process:axon guidance	GO:0007298:biological_process:border follicle cell migration	GO:0035147:biological_process:branch fusion, open tracheal system	GO:0090254:biological_process:cell elongation involved in imaginal disc-derived wing morphogenesis	GO:0034613:biological_process:cellular protein localization	GO:0006974:biological_process:cellular response to DNA damage stimulus	GO:0007349:biological_process:cellularization	GO:0001745:biological_process:compound eye morphogenesis	GO:0030866:biological_process:cortical actin cytoskeleton organization	GO:0007010:biological_process:cytoskeleton organization	GO:0048813:biological_process:dendrite morphogenesis	GO:0070593:biological_process:dendrite self-avoidance	GO:0007368:biological_process:determination of left/right symmetry	GO:0007391:biological_process:dorsal closure	GO:0046663:biological_process:dorsal closure, leading edge cell differentiation	GO:0007395:biological_process:dorsal closure, spreading of leading edge cells	GO:0006897:biological_process:endocytosis	GO:0007173:biological_process:epidermal growth factor receptor signaling pathway	GO:0001737:biological_process:establishment of imaginal disc-derived wing hair orientation	GO:0001736:biological_process:establishment of planar polarity	GO:0042249:biological_process:establishment of planar polarity of embryonic epithelium	GO:0045184:biological_process:establishment of protein localization
Locus_25413.0|BlastHit|gi|71153351|sp|Q5F359.1|TPPC5_CHICK	7719	GO:0005783:cellular_component:endoplasmic reticulum	GO:0005794:cellular_component:Golgi apparatus	GO:0030008:cellular_component:TRAPP complex	GO:0016192:biological_process:vesicle-mediated transport
Locus_25414.0|BlastHit|gi|123885924|sp|Q0V9J0.1|TMM69_XENTR	7720	GO:0016021:cellular_component:integral component of membrane
Locus_25418.0|BlastHit|gi|74870877|sp|Q9VTJ8.2|TIM14_DROME	7722	GO:0016021:cellular_component:integral component of membrane	GO:0005744:cellular_component:mitochondrial inner membrane presequence translocase complex	GO:0001405:cellular_component:presequence translocase-associated import motor	GO:0001671:molecular_function:ATPase activator activity	GO:0022008:biological_process:neurogenesis	GO:0032781:biological_process:positive regulation of ATPase activity	GO:0030150:biological_process:protein import into mitochondrial matrix
Locus_25453.1|BlastHit|gi|75069845|sp|Q58D31.3|DHSO_BOVIN	7763	GO:0070062:cellular_component:extracellular vesicular exosome	GO:0031966:cellular_component:mitochondrial membrane	GO:0031514:cellular_component:motile cilium	GO:0003939:molecular_function:L-iditol 2-dehydrogenase activity	GO:0051287:molecular_function:NAD binding	GO:0008270:molecular_function:zinc ion binding	GO:0046370:biological_process:fructose biosynthetic process	GO:0051160:biological_process:L-xylitol catabolic process	GO:0006062:biological_process:sorbitol catabolic process	GO:0030317:biological_process:sperm motility
Locus_25453.1|BlastHit|gi|75069845|sp|Q58D31.3|DHSO_BOVIN	7764	GO:0070062:cellular_component:extracellular vesicular exosome	GO:0031966:cellular_component:mitochondrial membrane	GO:0031514:cellular_component:motile cilium	GO:0003939:molecular_function:L-iditol 2-dehydrogenase activity	GO:0051287:molecular_function:NAD binding	GO:0008270:molecular_function:zinc ion binding	GO:0046370:biological_process:fructose biosynthetic process	GO:0051160:biological_process:L-xylitol catabolic process	GO:0006062:biological_process:sorbitol catabolic process	GO:0030317:biological_process:sperm motility
Locus_25462.0|BlastHit|gi|212288177|sp|Q7LKY2.1|ADDH_SCHPO	7771	GO:0005856:cellular_component:cytoskeleton
Locus_25462.0|BlastHit|gi|212288177|sp|Q7LKY2.1|ADDH_SCHPO	7772	GO:0005856:cellular_component:cytoskeleton
Locus_25489.0|BlastHit|gi|182676462|sp|A9UMS3.1|PHB2_XENTR	7784	GO:0070062:cellular_component:extracellular vesicular exosome	GO:0005743:cellular_component:mitochondrial inner membrane	GO:0016363:cellular_component:nuclear matrix	GO:0043234:cellular_component:protein complex	GO:0060749:biological_process:mammary gland alveolus development	GO:0060744:biological_process:mammary gland branching involved in thelarche	GO:0033147:biological_process:negative regulation of intracellular estrogen receptor signaling pathway	GO:0033600:biological_process:negative regulation of mammary gland epithelial cell proliferation	GO:0045892:biological_process:negative regulation of transcription, DNA-templated	GO:0060762:biological_process:regulation of branching involved in mammary gland duct morphogenesis	GO:0006351:biological_process:transcription, DNA-templated
Locus_25494.0|BlastHit|gi|125950361|sp|Q86U28.2|ISCA2_HUMAN	7787	GO:0005739:cellular_component:mitochondrion	GO:0051536:molecular_function:iron-sulfur cluster binding	GO:0046872:molecular_function:metal ion binding	GO:0005198:molecular_function:structural molecule activity	GO:0016226:biological_process:iron-sulfur cluster assembly
Locus_25531.0|BlastHit|gi|81885679|sp|Q6PEC1.1|TBCA_RAT	7835	GO:0005689:cellular_component:U12-type spliceosomal complex	GO:0006915:biological_process:apoptotic process	GO:2001235:biological_process:positive regulation of apoptotic signaling pathway	GO:0070234:biological_process:positive regulation of T cell apoptotic process	GO:0051384:biological_process:response to glucocorticoid
Locus_25531.0|BlastHit|gi|81885679|sp|Q6PEC1.1|TBCA_RAT	7835	GO:0005737:cellular_component:cytoplasm	GO:0005874:cellular_component:microtubule	GO:0007021:biological_process:tubulin complex assembly
Locus_25562.0|BlastHit|gi|81900078|sp|Q8CEF1.1|FEM1C_MOUSE	7876	GO:0005737:cellular_component:cytoplasm	GO:0016567:biological_process:protein ubiquitination
Locus_25571.0|BlastHit|gi|91208328|sp|Q3T904.1|ATG9A_BOVIN	7880	GO:0005776:cellular_component:autophagic vacuole	GO:0000421:cellular_component:autophagic vacuole membrane	GO:0031410:cellular_component:cytoplasmic vesicle	GO:0016021:cellular_component:integral component of membrane	GO:0031902:cellular_component:late endosome membrane	GO:0000407:cellular_component:pre-autophagosomal structure	GO:0005802:cellular_component:trans-Golgi network	GO:0000045:biological_process:autophagic vacuole assembly	GO:0044805:biological_process:late nucleophagy	GO:0000422:biological_process:mitochondrion degradation	GO:0034727:biological_process:piecemeal microautophagy of nucleus	GO:0034497:biological_process:protein localization to pre-autophagosomal structure	GO:0015031:biological_process:protein transport
Locus_25577.1|BlastHit|gi|48428484|sp|Q9BXM7.1|PINK1_HUMAN	7886	GO:0097449:cellular_component:astrocyte projection	GO:0030424:cellular_component:axon	GO:0044297:cellular_component:cell body	GO:0000785:cellular_component:chromatin	GO:0005737:cellular_component:cytoplasm	GO:0005856:cellular_component:cytoskeleton	GO:0005829:cellular_component:cytosol	GO:0031307:cellular_component:integral component of mitochondrial outer membrane	GO:0097413:cellular_component:Lewy body	GO:0016020:cellular_component:membrane	GO:0005743:cellular_component:mitochondrial inner membrane	GO:0005758:cellular_component:mitochondrial intermembrane space	GO:0005741:cellular_component:mitochondrial outer membrane	GO:0005739:cellular_component:mitochondrion	GO:0005634:cellular_component:nucleus	GO:0048471:cellular_component:perinuclear region of cytoplasm	GO:0005524:molecular_function:ATP binding	GO:0055131:molecular_function:C3HC4-type RING finger domain binding	GO:0010857:molecular_function:calcium-dependent protein kinase activity	GO:0016301:molecular_function:kinase activity	GO:0000287:molecular_function:magnesium ion binding	GO:0016504:molecular_function:peptidase activator activity	GO:0002020:molecular_function:protease binding	GO:0043422:molecular_function:protein kinase B binding	GO:0004674:molecular_function:protein serine/threonine kinase activity	GO:0031625:molecular_function:ubiquitin protein ligase binding	GO:0032148:biological_process:activation of protein kinase B activity	GO:0071456:biological_process:cellular response to hypoxia	GO:0097237:biological_process:cellular response to toxic substance	GO:0035556:biological_process:intracellular signal transduction	GO:0000422:biological_process:mitochondrion degradation	GO:0007005:biological_process:mitochondrion organization	GO:0010629:biological_process:negative regulation of gene expression	GO:1903384:biological_process:negative regulation of hydrogen peroxide-induced neuron intrinsic apoptotic signaling pathway	GO:0046329:biological_process:negative regulation of JNK cascade	GO:0043524:biological_process:negative regulation of neuron apoptotic process
Locus_25620.0|BlastHit|gi|73917780|sp|Q6PBQ2.1|CHMP7_DANRE	7928	GO:0000815:cellular_component:ESCRT III complex	GO:0008565:molecular_function:protein transporter activity	GO:0045324:biological_process:late endosome to vacuole transport
Locus_25638.0|BlastHit|gi|62900285|sp|Q8BH95.1|ECHM_MOUSE	7942	GO:0070062:cellular_component:extracellular vesicular exosome	GO:0005759:cellular_component:mitochondrial matrix	GO:0005739:cellular_component:mitochondrion	GO:0004300:molecular_function:enoyl-CoA hydratase activity	GO:0006635:biological_process:fatty acid beta-oxidation
Locus_25642.0|BlastHit|gi|115866|sp|P19222.1|CBPA2_RAT	7955	GO:0005576:cellular_component:extracellular region	GO:0004181:molecular_function:metallocarboxypeptidase activity	GO:0008270:molecular_function:zinc ion binding
Locus_25660.0|BlastHit|gi|82082907|sp|Q5ZMB2.1|HEBP1_CHICK	7968	GO:0005737:cellular_component:cytoplasm	GO:0020037:molecular_function:heme binding
Locus_25670.0|BlastHit|gi|17380252|sp|P70195.1|PSB7_MOUSE	7976	GO:0005829:cellular_component:cytosol	GO:0070062:cellular_component:extracellular vesicular exosome	GO:0015630:cellular_component:microtubule cytoskeleton	GO:0005634:cellular_component:nucleus	GO:0005839:cellular_component:proteasome core complex	GO:0004298:molecular_function:threonine-type endopeptidase activity	GO:0051603:biological_process:proteolysis involved in cellular protein catabolic process
Locus_25673.0|BlastHit|gi|20137699|sp|O70152.1|DPM1_MOUSE	7978	GO:0005789:cellular_component:endoplasmic reticulum membrane	GO:0004582:molecular_function:dolichyl-phosphate beta-D-mannosyltransferase activity	GO:0004169:molecular_function:dolichyl-phosphate-mannose-protein mannosyltransferase activity	GO:0006506:biological_process:GPI anchor biosynthetic process	GO:0035268:biological_process:protein mannosylation	GO:0035269:biological_process:protein O-linked mannosylation
Locus_25689.0|BlastHit|gi|32172424|sp|P11584.3|ITBX_DROME	7996	GO:0016324:cellular_component:apical plasma membrane	GO:0009925:cellular_component:basal plasma membrane	GO:0031252:cellular_component:cell leading edge	GO:0043034:cellular_component:costamere	GO:0005925:cellular_component:focal adhesion	GO:0008305:cellular_component:integrin complex	GO:0016328:cellular_component:lateral plasma membrane	GO:0005927:cellular_component:muscle tendon junction	GO:0005886:cellular_component:plasma membrane	GO:0050839:molecular_function:cell adhesion molecule binding	GO:0005178:molecular_function:integrin binding	GO:0046982:molecular_function:protein heterodimerization activity	GO:0004872:molecular_function:receptor activity	GO:0007015:biological_process:actin filament organization	GO:0007475:biological_process:apposition of dorsal and ventral imaginal disc-derived wing surfaces	GO:0007411:biological_process:axon guidance	GO:0007298:biological_process:border follicle cell migration	GO:0016339:biological_process:calcium-dependent cell-cell adhesion via plasma membrane cell adhesion molecules	GO:0016340:biological_process:calcium-dependent cell-matrix adhesion	GO:0007155:biological_process:cell adhesion	GO:0016477:biological_process:cell migration	GO:0007160:biological_process:cell-matrix adhesion	GO:0031589:biological_process:cell-substrate adhesion	GO:0007417:biological_process:central nervous system development	GO:0008340:biological_process:determination of adult lifespan	GO:0007391:biological_process:dorsal closure	GO:0035001:biological_process:dorsal trunk growth, open tracheal system	GO:0007427:biological_process:epithelial cell migration, open tracheal system	GO:0007629:biological_process:flight behavior	GO:0007377:biological_process:germ-band extension	GO:0030718:biological_process:germ-line stem cell maintenance	GO:0035099:biological_process:hemocyte migration	GO:0007157:biological_process:heterophilic cell-cell adhesion via plasma membrane cell adhesion molecules	GO:0048803:biological_process:imaginal disc-derived male genitalia morphogenesis	GO:0007229:biological_process:integrin-mediated signaling pathway	GO:0007508:biological_process:larval heart development
Locus_25700.0|BlastHit|gi|74871763|sp|Q9VYY9.3|Y1727_DROME	8009	GO:0005737:cellular_component:cytoplasm	GO:0005768:cellular_component:endosome	GO:0031982:cellular_component:vesicle	GO:0005097:molecular_function:Rab GTPase activator activity	GO:0017137:molecular_function:Rab GTPase binding	GO:0007298:biological_process:border follicle cell migration	GO:0032851:biological_process:positive regulation of Rab GTPase activity	GO:0030334:biological_process:regulation of cell migration	GO:0032880:biological_process:regulation of protein localization	GO:0032313:biological_process:regulation of Rab GTPase activity
Locus_25712.0|BlastHit|gi|59803097|sp|Q00537.2|CDK17_HUMAN	8031	GO:0005524:molecular_function:ATP binding	GO:0004693:molecular_function:cyclin-dependent protein serine/threonine kinase activity	GO:0004672:molecular_function:protein kinase activity	GO:0006468:biological_process:protein phosphorylation
Locus_25724.0|BlastHit|gi|21264423|sp|P21266.3|GSTM3_HUMAN	8042	GO:0005737:cellular_component:cytoplasm	GO:0005829:cellular_component:cytosol	GO:0070062:cellular_component:extracellular vesicular exosome	GO:0005634:cellular_component:nucleus	GO:0035686:cellular_component:sperm fibrous sheath	GO:0019899:molecular_function:enzyme binding	GO:0043295:molecular_function:glutathione binding	GO:0004364:molecular_function:glutathione transferase activity	GO:0042802:molecular_function:identical protein binding	GO:0042803:molecular_function:protein homodimerization activity	GO:0070458:biological_process:cellular detoxification of nitrogen compound	GO:0008065:biological_process:establishment of blood-nerve barrier	GO:1901687:biological_process:glutathione derivative biosynthetic process	GO:0006749:biological_process:glutathione metabolic process	GO:0018916:biological_process:nitrobenzene metabolic process	GO:0043627:biological_process:response to estrogen	GO:0044281:biological_process:small molecule metabolic process	GO:0042178:biological_process:xenobiotic catabolic process	GO:0006805:biological_process:xenobiotic metabolic process
Locus_25731.0|BlastHit|gi|74731102|sp|Q96AA3.1|RFT1_HUMAN	8044	GO:0016021:cellular_component:integral component of membrane	GO:0005319:molecular_function:lipid transporter activity	GO:0008643:biological_process:carbohydrate transport
Locus_25731.0|BlastHit|gi|74731102|sp|Q96AA3.1|RFT1_HUMAN	8044	GO:0016021:cellular_component:integral component of membrane	GO:0005319:molecular_function:lipid transporter activity	GO:0008643:biological_process:carbohydrate transport	GO:0044267:biological_process:cellular protein metabolic process	GO:0006488:biological_process:dolichol-linked oligosaccharide biosynthetic process	GO:0043687:biological_process:post-translational protein modification	GO:0018279:biological_process:protein N-linked glycosylation via asparagine
Locus_25742.0|BlastHit|gi|257051070|sp|P53992.3|SC24C_HUMAN	8050	GO:0030127:cellular_component:COPII vesicle coat	GO:0005829:cellular_component:cytosol	GO:0005789:cellular_component:endoplasmic reticulum membrane	GO:0012507:cellular_component:ER to Golgi transport vesicle membrane	GO:0000139:cellular_component:Golgi membrane	GO:0048471:cellular_component:perinuclear region of cytoplasm	GO:0008270:molecular_function:zinc ion binding	GO:0019886:biological_process:antigen processing and presentation of exogenous peptide antigen via MHC class II	GO:0002474:biological_process:antigen processing and presentation of peptide antigen via MHC class I	GO:0044267:biological_process:cellular protein metabolic process	GO:0048208:biological_process:COPII vesicle coating	GO:0006888:biological_process:ER to Golgi vesicle-mediated transport	GO:0006886:biological_process:intracellular protein transport	GO:0061024:biological_process:membrane organization	GO:0043687:biological_process:post-translational protein modification	GO:0018279:biological_process:protein N-linked glycosylation via asparagine	GO:0044281:biological_process:small molecule metabolic process
Locus_25785.0|BlastHit|gi|74866395|sp|Q94521.1|DNAT_DROME	8080	GO:0005737:cellular_component:cytoplasm	GO:0004059:molecular_function:aralkylamine N-acetyltransferase activity	GO:0004060:molecular_function:arylamine N-acetyltransferase activity	GO:0008080:molecular_function:N-acetyltransferase activity	GO:0006584:biological_process:catecholamine metabolic process	GO:0048066:biological_process:developmental pigmentation	GO:0042420:biological_process:dopamine catabolic process	GO:0030187:biological_process:melatonin biosynthetic process	GO:0046334:biological_process:octopamine catabolic process	GO:0045187:biological_process:regulation of circadian sleep/wake cycle, sleep	GO:0042429:biological_process:serotonin catabolic process	GO:0030431:biological_process:sleep
Locus_25810.0|BlastHit|gi|29428061|sp|Q9V7S5.1|PICO_DROME	8097	GO:0016021:cellular_component:integral component of membrane	GO:0015114:molecular_function:phosphate ion transmembrane transporter activity	GO:0015293:molecular_function:symporter activity	GO:0006814:biological_process:sodium ion transport
Locus_25813.0|BlastHit|gi|9297057|sp|Q9VND8.1|RHEB_DROME	8099	GO:0005886:cellular_component:plasma membrane	GO:0005525:molecular_function:GTP binding	GO:0003924:molecular_function:GTPase activity	GO:0007411:biological_process:axon guidance	GO:0005975:biological_process:carbohydrate metabolic process	GO:0016049:biological_process:cell growth	GO:0000082:biological_process:G1/S transition of mitotic cell cycle	GO:0006629:biological_process:lipid metabolic process	GO:0035264:biological_process:multicellular organism growth	GO:0010507:biological_process:negative regulation of autophagy	GO:0042331:biological_process:phototaxis	GO:0030307:biological_process:positive regulation of cell growth	GO:0045793:biological_process:positive regulation of cell size	GO:0090070:biological_process:positive regulation of ribosome biogenesis	GO:0032008:biological_process:positive regulation of TOR signaling	GO:0045727:biological_process:positive regulation of translation	GO:0010506:biological_process:regulation of autophagy	GO:2000377:biological_process:regulation of reactive oxygen species metabolic process	GO:0042594:biological_process:response to starvation	GO:0042254:biological_process:ribosome biogenesis	GO:0007264:biological_process:small GTPase mediated signal transduction	GO:0051124:biological_process:synaptic growth at neuromuscular junction
Locus_25831.0|BlastHit|gi|18203496|sp|Q9UBS3.1|DNJB9_HUMAN	8107	GO:0005737:cellular_component:cytoplasm	GO:0005783:cellular_component:endoplasmic reticulum	GO:0005788:cellular_component:endoplasmic reticulum lumen	GO:0070062:cellular_component:extracellular vesicular exosome	GO:0005730:cellular_component:nucleolus	GO:0030433:biological_process:ER-associated ubiquitin-dependent protein catabolic process
Locus_25843.0|BlastHit|gi|81861262|sp|O54836.1|ZMAT3_MOUSE	8116	GO:0005730:cellular_component:nucleolus	GO:0003723:molecular_function:RNA binding	GO:0008270:molecular_function:zinc ion binding	GO:0006915:biological_process:apoptotic process	GO:0006974:biological_process:cellular response to DNA damage stimulus	GO:0030308:biological_process:negative regulation of cell growth	GO:0015031:biological_process:protein transport
Locus_25894.2|BlastHit|gi|20455506|sp|Q60715.2|P4HA1_MOUSE	8172	GO:0005788:cellular_component:endoplasmic reticulum lumen	GO:0016020:cellular_component:membrane	GO:0005739:cellular_component:mitochondrion	GO:0016222:cellular_component:procollagen-proline 4-dioxygenase complex	GO:0005506:molecular_function:iron ion binding	GO:0031418:molecular_function:L-ascorbic acid binding	GO:0016702:molecular_function:oxidoreductase activity, acting on single donors with incorporation of molecular oxygen, incorporation of two atoms of oxygen	GO:0004656:molecular_function:procollagen-proline 4-dioxygenase activity	GO:0030199:biological_process:collagen fibril organization	GO:0018401:biological_process:peptidyl-proline hydroxylation to 4-hydroxy-L-proline
Locus_25895.0|BlastHit|gi|25090702|sp|O46040.3|MSTAA_DROME	8173	GO:0042826:molecular_function:histone deacetylase binding	GO:0008168:molecular_function:methyltransferase activity	GO:0010629:biological_process:negative regulation of gene expression
Locus_25900.0|BlastHit|gi|115311242|sp|Q5YW75.1|ECTD_NOCFA	8175	GO:0005886:cellular_component:plasma membrane	GO:0031418:molecular_function:L-ascorbic acid binding	GO:0046872:molecular_function:metal ion binding	GO:0048244:molecular_function:phytanoyl-CoA dioxygenase activity	GO:0006631:biological_process:fatty acid metabolic process
Locus_25922.0|BlastHit|gi|5921940|sp|P81580.1|CUPC1_CANPG	8185	GO:0042302:molecular_function:structural constituent of cuticle
Locus_25932.0|BlastHit|gi|110808226|sp|Q29S14.1|F18B1_BOVIN	8193	GO:0016021:cellular_component:integral component of membrane
Locus_25934.0|BlastHit|gi|25090702|sp|O46040.3|MSTAA_DROME	8196	GO:0042826:molecular_function:histone deacetylase binding	GO:0008168:molecular_function:methyltransferase activity	GO:0010629:biological_process:negative regulation of gene expression
Locus_25946.0|BlastHit|gi|12231038|sp|Q99471.2|PFD5_HUMAN	8209	GO:0005737:cellular_component:cytoplasm	GO:0005634:cellular_component:nucleus	GO:0016272:cellular_component:prefoldin complex	GO:0003714:molecular_function:transcription corepressor activity	GO:0051084:biological_process:'de novo' posttranslational protein folding	GO:0044267:biological_process:cellular protein metabolic process	GO:0090090:biological_process:negative regulation of canonical Wnt signaling pathway	GO:0045892:biological_process:negative regulation of transcription, DNA-templated	GO:0006457:biological_process:protein folding	GO:0006355:biological_process:regulation of transcription, DNA-templated	GO:0060041:biological_process:retina development in camera-type eye
Locus_25947.0|BlastHit|gi|123893574|sp|Q29R99.1|LIPT2_DANRE	8210	GO:0005759:cellular_component:mitochondrial matrix	GO:0005739:cellular_component:mitochondrion	GO:0034553:biological_process:mitochondrial respiratory chain complex II assembly
Locus_25947.0|BlastHit|gi|123893574|sp|Q29R99.1|LIPT2_DANRE	8210	GO:0005739:cellular_component:mitochondrion	GO:0016874:molecular_function:ligase activity	GO:0033819:molecular_function:lipoyl(octanoyl) transferase activity	GO:0016415:molecular_function:octanoyltransferase activity	GO:0006464:biological_process:cellular protein modification process	GO:0009107:biological_process:lipoate biosynthetic process
Locus_25955.1|BlastHit|gi|82186176|sp|Q6P1S4.1|SYRC_XENTR	8218	GO:0005737:cellular_component:cytoplasm	GO:0004814:molecular_function:arginine-tRNA ligase activity	GO:0005524:molecular_function:ATP binding	GO:0006420:biological_process:arginyl-tRNA aminoacylation
Locus_25961.0|BlastHit|gi|205831220|sp|A2VDQ7.1|ZN420_BOVIN	8221	GO:0005634:cellular_component:nucleus	GO:0003677:molecular_function:DNA binding	GO:0046872:molecular_function:metal ion binding	GO:0006355:biological_process:regulation of transcription, DNA-templated	GO:0006351:biological_process:transcription, DNA-templated
Locus_25971.0|BlastHit|gi|75076029|sp|Q4R5G7.1|DHB12_MACFA	8241	GO:0005789:cellular_component:endoplasmic reticulum membrane	GO:0016021:cellular_component:integral component of membrane	GO:0004303:molecular_function:estradiol 17-beta-dehydrogenase activity	GO:0006703:biological_process:estrogen biosynthetic process	GO:0006633:biological_process:fatty acid biosynthetic process
Locus_25998.0|BlastHit|gi|13431851|sp|P82347.1|SGCD_MOUSE	8276	GO:0005737:cellular_component:cytoplasm	GO:0005856:cellular_component:cytoskeleton	GO:0016011:cellular_component:dystroglycan complex	GO:0005887:cellular_component:integral component of plasma membrane	GO:0016012:cellular_component:sarcoglycan complex	GO:0042383:cellular_component:sarcolemma	GO:0061024:biological_process:membrane organization
Locus_26016.0|BlastHit|gi|17367081|sp|Q9SF85.1|ADK1_ARATH	8293	GO:0048046:cellular_component:apoplast	GO:0009507:cellular_component:chloroplast	GO:0005829:cellular_component:cytosol	GO:0016020:cellular_component:membrane	GO:0005886:cellular_component:plasma membrane	GO:0009506:cellular_component:plasmodesma	GO:0004001:molecular_function:adenosine kinase activity	GO:0005524:molecular_function:ATP binding	GO:0005507:molecular_function:copper ion binding	GO:0016773:molecular_function:phosphotransferase activity, alcohol group as acceptor	GO:0006169:biological_process:adenosine salvage	GO:0044209:biological_process:AMP salvage	GO:0046686:biological_process:response to cadmium ion	GO:0080094:biological_process:response to trehalose-6-phosphate	GO:0016032:biological_process:viral process
Locus_26018.0|BlastHit|gi|10720082|sp|Q9Y4Z0.1|LSM4_HUMAN	8294	GO:0005829:cellular_component:cytosol	GO:0030532:cellular_component:small nuclear ribonucleoprotein complex	GO:0005681:cellular_component:spliceosomal complex	GO:0005688:cellular_component:U6 snRNP	GO:0044822:molecular_function:poly(A) RNA binding	GO:0043928:biological_process:exonucleolytic nuclear-transcribed mRNA catabolic process involved in deadenylation-dependent decay	GO:0010467:biological_process:gene expression	GO:0016071:biological_process:mRNA metabolic process	GO:0006397:biological_process:mRNA processing	GO:0000288:biological_process:nuclear-transcribed mRNA catabolic process, deadenylation-dependent decay	GO:0016070:biological_process:RNA metabolic process	GO:0008380:biological_process:RNA splicing
Locus_26020.0|BlastHit|gi|257096251|sp|B0W3L6.1|CARM1_CULQU	8296	GO:0005737:cellular_component:cytoplasm	GO:0005634:cellular_component:nucleus	GO:0042054:molecular_function:histone methyltransferase activity	GO:0008469:molecular_function:histone-arginine N-methyltransferase activity	GO:0035242:molecular_function:protein-arginine omega-N asymmetric methyltransferase activity	GO:0035241:molecular_function:protein-arginine omega-N monomethyltransferase activity	GO:0006338:biological_process:chromatin remodeling	GO:0034969:biological_process:histone arginine methylation	GO:0019919:biological_process:peptidyl-arginine methylation, to asymmetrical-dimethyl arginine	GO:0006355:biological_process:regulation of transcription, DNA-templated	GO:0006351:biological_process:transcription, DNA-templated
Locus_26020.0|BlastHit|gi|257096251|sp|B0W3L6.1|CARM1_CULQU	8297	GO:0005737:cellular_component:cytoplasm	GO:0005634:cellular_component:nucleus	GO:0042054:molecular_function:histone methyltransferase activity	GO:0008469:molecular_function:histone-arginine N-methyltransferase activity	GO:0035242:molecular_function:protein-arginine omega-N asymmetric methyltransferase activity	GO:0035241:molecular_function:protein-arginine omega-N monomethyltransferase activity	GO:0006338:biological_process:chromatin remodeling	GO:0034969:biological_process:histone arginine methylation	GO:0019919:biological_process:peptidyl-arginine methylation, to asymmetrical-dimethyl arginine	GO:0006355:biological_process:regulation of transcription, DNA-templated	GO:0006351:biological_process:transcription, DNA-templated
Locus_26023.0|BlastHit|gi|38503351|sp|Q8N1M1.1|BEST3_HUMAN	8304	GO:0034707:cellular_component:chloride channel complex	GO:0005886:cellular_component:plasma membrane	GO:0005254:molecular_function:chloride channel activity	GO:0043271:biological_process:negative regulation of ion transport
Locus_26040.0|BlastHit|gi|18202839|sp|Q9CXN7.1|PBLD2_MOUSE	8329	GO:0005737:cellular_component:cytoplasm	GO:0070062:cellular_component:extracellular vesicular exosome	GO:0016853:molecular_function:isomerase activity	GO:0009058:biological_process:biosynthetic process	GO:0030277:biological_process:maintenance of gastrointestinal epithelium	GO:0010633:biological_process:negative regulation of epithelial cell migration	GO:0050680:biological_process:negative regulation of epithelial cell proliferation	GO:0010719:biological_process:negative regulation of epithelial to mesenchymal transition	GO:0060394:biological_process:negative regulation of pathway-restricted SMAD protein phosphorylation	GO:0060392:biological_process:negative regulation of SMAD protein import into nucleus	GO:0030512:biological_process:negative regulation of transforming growth factor beta receptor signaling pathway
Locus_26042.1|BlastHit|gi|60390935|sp|Q7Z5L0.1|VMO1_HUMAN	8331	GO:0070062:cellular_component:extracellular vesicular exosome
Locus_26042.1|BlastHit|gi|60390935|sp|Q7Z5L0.1|VMO1_HUMAN	8333	GO:0070062:cellular_component:extracellular vesicular exosome
Locus_26046.0|BlastHit|gi|25090065|sp|Q9VNV3.1|DDX1_DROME	8336	GO:0005634:cellular_component:nucleus	GO:0005524:molecular_function:ATP binding	GO:0008026:molecular_function:ATP-dependent helicase activity	GO:0003682:molecular_function:chromatin binding	GO:0033677:molecular_function:DNA/RNA helicase activity	GO:0004527:molecular_function:exonuclease activity	GO:0004386:molecular_function:helicase activity	GO:0004518:molecular_function:nuclease activity	GO:0008143:molecular_function:poly(A) binding	GO:0003712:molecular_function:transcription cofactor activity	GO:0006200:biological_process:ATP catabolic process	GO:0032508:biological_process:DNA duplex unwinding	GO:0006302:biological_process:double-strand break repair	GO:0001700:biological_process:embryonic development via the syncytial blastoderm	GO:0090305:biological_process:nucleic acid phosphodiester bond hydrolysis	GO:1903506:biological_process:regulation of nucleic acid-templated transcription	GO:0042254:biological_process:ribosome biogenesis
Locus_26054.0|BlastHit|gi|136424|sp|P00765.1|TRYP_ASTFL	8342	GO:0005615:cellular_component:extracellular space	GO:0046872:molecular_function:metal ion binding	GO:0004252:molecular_function:serine-type endopeptidase activity	GO:0007586:biological_process:digestion
Locus_26055.0|BlastHit|gi|30315972|sp|O08605.2|MKNK1_MOUSE	8343	GO:0005524:molecular_function:ATP binding	GO:0004674:molecular_function:protein serine/threonine kinase activity	GO:0097192:biological_process:extrinsic apoptotic signaling pathway in absence of ligand	GO:0035556:biological_process:intracellular signal transduction	GO:0018105:biological_process:peptidyl-serine phosphorylation	GO:0006468:biological_process:protein phosphorylation	GO:0006446:biological_process:regulation of translational initiation	GO:0009651:biological_process:response to salt stress
Locus_26055.0|BlastHit|gi|30315972|sp|O08605.2|MKNK1_MOUSE	8343	GO:0005887:cellular_component:integral component of plasma membrane	GO:0005765:cellular_component:lysosomal membrane	GO:0007155:biological_process:cell adhesion
Locus_26062.0|BlastHit|gi|1706299|sp|P51398.1|RT29_HUMAN	8350	GO:0005761:cellular_component:mitochondrial ribosome	GO:0005739:cellular_component:mitochondrion	GO:0005730:cellular_component:nucleolus	GO:0015935:cellular_component:small ribosomal subunit	GO:0044822:molecular_function:poly(A) RNA binding	GO:0008637:biological_process:apoptotic mitochondrial changes
Locus_26071.0|BlastHit|gi|135425|sp|P09645.1|TBA8_CHICK	8363	GO:0005737:cellular_component:cytoplasm	GO:0005874:cellular_component:microtubule	GO:0005525:molecular_function:GTP binding	GO:0003924:molecular_function:GTPase activity	GO:0005200:molecular_function:structural constituent of cytoskeleton	GO:0007017:biological_process:microtubule-based process	GO:0051258:biological_process:protein polymerization
Locus_26085.0|BlastHit|gi|3041732|sp|P09671.3|SODM_MOUSE	8367	GO:0070062:cellular_component:extracellular vesicular exosome	GO:0005743:cellular_component:mitochondrial inner membrane	GO:0042645:cellular_component:mitochondrial nucleoid	GO:0005739:cellular_component:mitochondrion	GO:0003677:molecular_function:DNA binding	GO:0030145:molecular_function:manganese ion binding	GO:0019825:molecular_function:oxygen binding	GO:0004784:molecular_function:superoxide dismutase activity	GO:0001306:biological_process:age-dependent response to oxidative stress	GO:0001315:biological_process:age-dependent response to reactive oxygen species	GO:0008637:biological_process:apoptotic mitochondrial changes	GO:0071361:biological_process:cellular response to ethanol	GO:0003032:biological_process:detection of oxygen	GO:0048773:biological_process:erythrophore differentiation	GO:0006749:biological_process:glutathione metabolic process	GO:0007507:biological_process:heart development	GO:0030097:biological_process:hemopoiesis	GO:0050665:biological_process:hydrogen peroxide biosynthetic process	GO:0008630:biological_process:intrinsic apoptotic signaling pathway in response to DNA damage	GO:0008631:biological_process:intrinsic apoptotic signaling pathway in response to oxidative stress	GO:0055072:biological_process:iron ion homeostasis	GO:0001889:biological_process:liver development	GO:0007626:biological_process:locomotory behavior	GO:0007005:biological_process:mitochondrion organization	GO:0045599:biological_process:negative regulation of fat cell differentiation	GO:0048147:biological_process:negative regulation of fibroblast proliferation	GO:0043524:biological_process:negative regulation of neuron apoptotic process	GO:1902176:biological_process:negative regulation of oxidative stress-induced intrinsic apoptotic signaling pathway	GO:0048666:biological_process:neuron development	GO:0032364:biological_process:oxygen homeostasis	GO:0045429:biological_process:positive regulation of nitric oxide biosynthetic process	GO:0009791:biological_process:post-embryonic development	GO:0051289:biological_process:protein homotetramerization	GO:0008217:biological_process:regulation of blood pressure	GO:0050790:biological_process:regulation of catalytic activity	GO:0051881:biological_process:regulation of mitochondrial membrane potential
Locus_26093.0|BlastHit|gi|66774003|sp|Q7TNC8.1|GLRA2_MOUSE	8375	GO:0030054:cellular_component:cell junction	GO:0034707:cellular_component:chloride channel complex	GO:0005887:cellular_component:integral component of plasma membrane	GO:0005886:cellular_component:plasma membrane	GO:0045211:cellular_component:postsynaptic membrane	GO:0016934:molecular_function:extracellular-glycine-gated chloride channel activity	GO:0016594:molecular_function:glycine binding	GO:0022824:molecular_function:transmitter-gated ion channel activity	GO:1902476:biological_process:chloride transmembrane transport	GO:0034220:biological_process:ion transmembrane transport	GO:0006811:biological_process:ion transport	GO:0007218:biological_process:neuropeptide signaling pathway	GO:0055085:biological_process:transmembrane transport
Locus_26099.1|BlastHit|gi|34395772|sp|Q8CEE7.1|RDH13_MOUSE	8378	GO:0005622:cellular_component:intracellular	GO:0004745:molecular_function:retinol dehydrogenase activity	GO:0050896:biological_process:response to stimulus	GO:0042572:biological_process:retinol metabolic process	GO:0007601:biological_process:visual perception
Locus_26105.0|BlastHit|gi|205831681|sp|B0BN95.1|HARB1_RAT	8383	GO:0005813:cellular_component:centrosome	GO:0005737:cellular_component:cytoplasm	GO:0005634:cellular_component:nucleus	GO:0046872:molecular_function:metal ion binding	GO:0004518:molecular_function:nuclease activity
Locus_26106.0|BlastHit|gi|27923748|sp|Q9NGC3.2|CEG1A_DROME	8384	GO:0005622:cellular_component:intracellular	GO:0008060:molecular_function:ARF GTPase activator activity	GO:0005525:molecular_function:GTP binding	GO:0005096:molecular_function:GTPase activator activity	GO:0003924:molecular_function:GTPase activity	GO:0008270:molecular_function:zinc ion binding	GO:0006184:biological_process:GTP catabolic process	GO:0043547:biological_process:positive regulation of GTPase activity	GO:0032312:biological_process:regulation of ARF GTPase activity	GO:0007264:biological_process:small GTPase mediated signal transduction
Locus_26108.0|BlastHit|gi|119372161|sp|Q2KII6.1|NGDN_BOVIN	8385	GO:0030424:cellular_component:axon	GO:0000775:cellular_component:chromosome, centromeric region	GO:0005737:cellular_component:cytoplasm	GO:0030425:cellular_component:dendrite	GO:0030175:cellular_component:filopodium	GO:0005730:cellular_component:nucleolus	GO:0044822:molecular_function:poly(A) RNA binding	GO:0006417:biological_process:regulation of translation
Locus_26112.0|BlastHit|gi|290463172|sp|B4HZ81.1|CISD2_DROSE	8386	GO:0005789:cellular_component:endoplasmic reticulum membrane	GO:0016021:cellular_component:integral component of membrane	GO:0051537:molecular_function:2 iron, 2 sulfur cluster binding	GO:0046872:molecular_function:metal ion binding
Locus_26113.0|BlastHit|gi|50402181|sp|Q7T2P6.1|TIM23_DANRE	8387	GO:0016021:cellular_component:integral component of membrane	GO:0005744:cellular_component:mitochondrial inner membrane presequence translocase complex	GO:0042719:cellular_component:mitochondrial intermembrane space protein transporter complex	GO:0015450:molecular_function:P-P-bond-hydrolysis-driven protein transmembrane transporter activity	GO:0008565:molecular_function:protein transporter activity	GO:0006886:biological_process:intracellular protein transport	GO:0007275:biological_process:multicellular organismal development	GO:0045039:biological_process:protein import into mitochondrial inner membrane
Locus_26134.0|BlastHit|gi|110825729|sp|P05661.4|MYSA_DROME	8402	GO:0031672:cellular_component:A band	GO:0016459:cellular_component:myosin complex	GO:0032982:cellular_component:myosin filament	GO:0005703:cellular_component:polytene chromosome puff	GO:0030017:cellular_component:sarcomere	GO:0030898:molecular_function:actin-dependent ATPase activity	GO:0005524:molecular_function:ATP binding	GO:0042623:molecular_function:ATPase activity, coupled	GO:0003774:molecular_function:motor activity	GO:0042803:molecular_function:protein homodimerization activity	GO:0008307:molecular_function:structural constituent of muscle	GO:0007527:biological_process:adult somatic muscle development	GO:0006200:biological_process:ATP catabolic process	GO:0007298:biological_process:border follicle cell migration	GO:0007427:biological_process:epithelial cell migration, open tracheal system	GO:0060361:biological_process:flight	GO:0040011:biological_process:locomotion	GO:0042692:biological_process:muscle cell differentiation	GO:0006936:biological_process:muscle contraction	GO:0007517:biological_process:muscle organ development	GO:0030239:biological_process:myofibril assembly	GO:0031033:biological_process:myosin filament organization	GO:0050821:biological_process:protein stabilization	GO:0045214:biological_process:sarcomere organization	GO:0030241:biological_process:skeletal muscle myosin thick filament assembly
Locus_26134.0|BlastHit|gi|110825729|sp|P05661.4|MYSA_DROME	8405	GO:0031672:cellular_component:A band	GO:0016459:cellular_component:myosin complex	GO:0032982:cellular_component:myosin filament	GO:0005703:cellular_component:polytene chromosome puff	GO:0030017:cellular_component:sarcomere	GO:0030898:molecular_function:actin-dependent ATPase activity	GO:0005524:molecular_function:ATP binding	GO:0042623:molecular_function:ATPase activity, coupled	GO:0003774:molecular_function:motor activity	GO:0042803:molecular_function:protein homodimerization activity	GO:0008307:molecular_function:structural constituent of muscle	GO:0007527:biological_process:adult somatic muscle development	GO:0006200:biological_process:ATP catabolic process	GO:0007298:biological_process:border follicle cell migration	GO:0007427:biological_process:epithelial cell migration, open tracheal system	GO:0060361:biological_process:flight	GO:0040011:biological_process:locomotion	GO:0042692:biological_process:muscle cell differentiation	GO:0006936:biological_process:muscle contraction	GO:0007517:biological_process:muscle organ development	GO:0030239:biological_process:myofibril assembly	GO:0031033:biological_process:myosin filament organization	GO:0050821:biological_process:protein stabilization	GO:0045214:biological_process:sarcomere organization	GO:0030241:biological_process:skeletal muscle myosin thick filament assembly
Locus_26134.0|BlastHit|gi|110825729|sp|P05661.4|MYSA_DROME	8406	GO:0031672:cellular_component:A band	GO:0016459:cellular_component:myosin complex	GO:0032982:cellular_component:myosin filament	GO:0005703:cellular_component:polytene chromosome puff	GO:0030017:cellular_component:sarcomere	GO:0030898:molecular_function:actin-dependent ATPase activity	GO:0005524:molecular_function:ATP binding	GO:0042623:molecular_function:ATPase activity, coupled	GO:0003774:molecular_function:motor activity	GO:0042803:molecular_function:protein homodimerization activity	GO:0008307:molecular_function:structural constituent of muscle	GO:0007527:biological_process:adult somatic muscle development	GO:0006200:biological_process:ATP catabolic process	GO:0007298:biological_process:border follicle cell migration	GO:0007427:biological_process:epithelial cell migration, open tracheal system	GO:0060361:biological_process:flight	GO:0040011:biological_process:locomotion	GO:0042692:biological_process:muscle cell differentiation	GO:0006936:biological_process:muscle contraction	GO:0007517:biological_process:muscle organ development	GO:0030239:biological_process:myofibril assembly	GO:0031033:biological_process:myosin filament organization	GO:0050821:biological_process:protein stabilization	GO:0045214:biological_process:sarcomere organization	GO:0030241:biological_process:skeletal muscle myosin thick filament assembly
Locus_26134.0|BlastHit|gi|110825729|sp|P05661.4|MYSA_DROME	8408	GO:0031672:cellular_component:A band	GO:0016459:cellular_component:myosin complex	GO:0032982:cellular_component:myosin filament	GO:0005703:cellular_component:polytene chromosome puff	GO:0030017:cellular_component:sarcomere	GO:0030898:molecular_function:actin-dependent ATPase activity	GO:0005524:molecular_function:ATP binding	GO:0042623:molecular_function:ATPase activity, coupled	GO:0003774:molecular_function:motor activity	GO:0042803:molecular_function:protein homodimerization activity	GO:0008307:molecular_function:structural constituent of muscle	GO:0007527:biological_process:adult somatic muscle development	GO:0006200:biological_process:ATP catabolic process	GO:0007298:biological_process:border follicle cell migration	GO:0007427:biological_process:epithelial cell migration, open tracheal system	GO:0060361:biological_process:flight	GO:0040011:biological_process:locomotion	GO:0042692:biological_process:muscle cell differentiation	GO:0006936:biological_process:muscle contraction	GO:0007517:biological_process:muscle organ development	GO:0030239:biological_process:myofibril assembly	GO:0031033:biological_process:myosin filament organization	GO:0050821:biological_process:protein stabilization	GO:0045214:biological_process:sarcomere organization	GO:0030241:biological_process:skeletal muscle myosin thick filament assembly
Locus_26134.0|BlastHit|gi|110825729|sp|P05661.4|MYSA_DROME	8409	GO:0031672:cellular_component:A band	GO:0016459:cellular_component:myosin complex	GO:0032982:cellular_component:myosin filament	GO:0005703:cellular_component:polytene chromosome puff	GO:0030017:cellular_component:sarcomere	GO:0030898:molecular_function:actin-dependent ATPase activity	GO:0005524:molecular_function:ATP binding	GO:0042623:molecular_function:ATPase activity, coupled	GO:0003774:molecular_function:motor activity	GO:0042803:molecular_function:protein homodimerization activity	GO:0008307:molecular_function:structural constituent of muscle	GO:0007527:biological_process:adult somatic muscle development	GO:0006200:biological_process:ATP catabolic process	GO:0007298:biological_process:border follicle cell migration	GO:0007427:biological_process:epithelial cell migration, open tracheal system	GO:0060361:biological_process:flight	GO:0040011:biological_process:locomotion	GO:0042692:biological_process:muscle cell differentiation	GO:0006936:biological_process:muscle contraction	GO:0007517:biological_process:muscle organ development	GO:0030239:biological_process:myofibril assembly	GO:0031033:biological_process:myosin filament organization	GO:0050821:biological_process:protein stabilization	GO:0045214:biological_process:sarcomere organization	GO:0030241:biological_process:skeletal muscle myosin thick filament assembly
Locus_26134.0|BlastHit|gi|110825729|sp|P05661.4|MYSA_DROME	8410	GO:0031672:cellular_component:A band	GO:0016459:cellular_component:myosin complex	GO:0032982:cellular_component:myosin filament	GO:0005703:cellular_component:polytene chromosome puff	GO:0030017:cellular_component:sarcomere	GO:0030898:molecular_function:actin-dependent ATPase activity	GO:0005524:molecular_function:ATP binding	GO:0042623:molecular_function:ATPase activity, coupled	GO:0003774:molecular_function:motor activity	GO:0042803:molecular_function:protein homodimerization activity	GO:0008307:molecular_function:structural constituent of muscle	GO:0007527:biological_process:adult somatic muscle development	GO:0006200:biological_process:ATP catabolic process	GO:0007298:biological_process:border follicle cell migration	GO:0007427:biological_process:epithelial cell migration, open tracheal system	GO:0060361:biological_process:flight	GO:0040011:biological_process:locomotion	GO:0042692:biological_process:muscle cell differentiation	GO:0006936:biological_process:muscle contraction	GO:0007517:biological_process:muscle organ development	GO:0030239:biological_process:myofibril assembly	GO:0031033:biological_process:myosin filament organization	GO:0050821:biological_process:protein stabilization	GO:0045214:biological_process:sarcomere organization	GO:0030241:biological_process:skeletal muscle myosin thick filament assembly
Locus_26134.0|BlastHit|gi|110825729|sp|P05661.4|MYSA_DROME	8412	GO:0031672:cellular_component:A band	GO:0016459:cellular_component:myosin complex	GO:0032982:cellular_component:myosin filament	GO:0005703:cellular_component:polytene chromosome puff	GO:0030017:cellular_component:sarcomere	GO:0030898:molecular_function:actin-dependent ATPase activity	GO:0005524:molecular_function:ATP binding	GO:0042623:molecular_function:ATPase activity, coupled	GO:0003774:molecular_function:motor activity	GO:0042803:molecular_function:protein homodimerization activity	GO:0008307:molecular_function:structural constituent of muscle	GO:0007527:biological_process:adult somatic muscle development	GO:0006200:biological_process:ATP catabolic process	GO:0007298:biological_process:border follicle cell migration	GO:0007427:biological_process:epithelial cell migration, open tracheal system	GO:0060361:biological_process:flight	GO:0040011:biological_process:locomotion	GO:0042692:biological_process:muscle cell differentiation	GO:0006936:biological_process:muscle contraction	GO:0007517:biological_process:muscle organ development	GO:0030239:biological_process:myofibril assembly	GO:0031033:biological_process:myosin filament organization	GO:0050821:biological_process:protein stabilization	GO:0045214:biological_process:sarcomere organization	GO:0030241:biological_process:skeletal muscle myosin thick filament assembly
Locus_26146.0|BlastHit|gi|143811452|sp|Q13905.3|RPGF1_HUMAN	8422	GO:0005829:cellular_component:cytosol	GO:0005769:cellular_component:early endosome	GO:0005768:cellular_component:endosome	GO:0017034:molecular_function:Rap guanyl-nucleotide exchange factor activity	GO:0000186:biological_process:activation of MAPKK activity	GO:0001568:biological_process:blood vessel development	GO:0071320:biological_process:cellular response to cAMP	GO:1990090:biological_process:cellular response to nerve growth factor stimulus	GO:0061028:biological_process:establishment of endothelial barrier	GO:0090090:biological_process:negative regulation of canonical Wnt signaling pathway	GO:0070373:biological_process:negative regulation of ERK1 and ERK2 cascade	GO:2000178:biological_process:negative regulation of neural precursor cell proliferation	GO:0051898:biological_process:negative regulation of protein kinase B signaling	GO:0046580:biological_process:negative regulation of Ras protein signal transduction	GO:0038180:biological_process:nerve growth factor signaling pathway	GO:0048011:biological_process:neurotrophin TRK receptor signaling pathway	GO:0048008:biological_process:platelet-derived growth factor receptor signaling pathway	GO:0010976:biological_process:positive regulation of neuron projection development	GO:0032854:biological_process:positive regulation of Rap GTPase activity	GO:0032486:biological_process:Rap protein signal transduction	GO:1901888:biological_process:regulation of cell junction assembly	GO:0007165:biological_process:signal transduction	GO:0016337:biological_process:single organismal cell-cell adhesion	GO:0007169:biological_process:transmembrane receptor protein tyrosine kinase signaling pathway
Locus_26162.0|BlastHit|gi|3915117|sp|P97615.1|THIOM_RAT	8437	GO:0016021:cellular_component:integral component of membrane
Locus_26162.0|BlastHit|gi|3915117|sp|P97615.1|THIOM_RAT	8437	GO:0005739:cellular_component:mitochondrion	GO:0005730:cellular_component:nucleolus	GO:0015035:molecular_function:protein disulfide oxidoreductase activity	GO:0045454:biological_process:cell redox homeostasis	GO:0006662:biological_process:glycerol ether metabolic process
Locus_26172.0|BlastHit|gi|6015048|sp|O46629.1|ECHB_BOVIN	8449	GO:0005783:cellular_component:endoplasmic reticulum	GO:0070062:cellular_component:extracellular vesicular exosome	GO:0005743:cellular_component:mitochondrial inner membrane	GO:0042645:cellular_component:mitochondrial nucleoid	GO:0005741:cellular_component:mitochondrial outer membrane	GO:0003988:molecular_function:acetyl-CoA C-acyltransferase activity	GO:0016509:molecular_function:long-chain-3-hydroxyacyl-CoA dehydrogenase activity	GO:0044822:molecular_function:poly(A) RNA binding	GO:0006635:biological_process:fatty acid beta-oxidation
Locus_26193.0|BlastHit|gi|223590061|sp|Q29IK4.2|RM22_DROPS	8461	GO:0015934:cellular_component:large ribosomal subunit	GO:0005739:cellular_component:mitochondrion	GO:0003735:molecular_function:structural constituent of ribosome	GO:0006412:biological_process:translation
Locus_26213.0|BlastHit|gi|27923984|sp|P18932.4|NU5M_DROME	8478	GO:0016021:cellular_component:integral component of membrane	GO:0005743:cellular_component:mitochondrial inner membrane	GO:0045263:cellular_component:proton-transporting ATP synthase complex, coupling factor F(o)	GO:0015078:molecular_function:hydrogen ion transmembrane transporter activity	GO:0015986:biological_process:ATP synthesis coupled proton transport
Locus_26213.0|BlastHit|gi|27923984|sp|P18932.4|NU5M_DROME	8478	GO:0016021:cellular_component:integral component of membrane	GO:0005743:cellular_component:mitochondrial inner membrane	GO:0070469:cellular_component:respiratory chain	GO:0008137:molecular_function:NADH dehydrogenase (ubiquinone) activity	GO:0042773:biological_process:ATP synthesis coupled electron transport
Locus_26213.0|BlastHit|gi|27923984|sp|P18932.4|NU5M_DROME	8478	GO:0016021:cellular_component:integral component of membrane	GO:0005743:cellular_component:mitochondrial inner membrane	GO:0070469:cellular_component:respiratory chain	GO:0008137:molecular_function:NADH dehydrogenase (ubiquinone) activity	GO:0042773:biological_process:ATP synthesis coupled electron transport
Locus_26213.0|BlastHit|gi|27923984|sp|P18932.4|NU5M_DROME	8478	GO:0016021:cellular_component:integral component of membrane	GO:0005743:cellular_component:mitochondrial inner membrane	GO:0070469:cellular_component:respiratory chain	GO:0008137:molecular_function:NADH dehydrogenase (ubiquinone) activity	GO:0042773:biological_process:ATP synthesis coupled electron transport
Locus_26213.0|BlastHit|gi|27923984|sp|P18932.4|NU5M_DROME	8478	GO:0016021:cellular_component:integral component of membrane	GO:0031966:cellular_component:mitochondrial membrane	GO:0070469:cellular_component:respiratory chain	GO:0008137:molecular_function:NADH dehydrogenase (ubiquinone) activity
Locus_26213.0|BlastHit|gi|27923984|sp|P18932.4|NU5M_DROME	8478	GO:0016021:cellular_component:integral component of membrane	GO:0031966:cellular_component:mitochondrial membrane	GO:0070469:cellular_component:respiratory chain	GO:0008137:molecular_function:NADH dehydrogenase (ubiquinone) activity
Locus_26222.0|BlastHit|gi|338817662|sp|C0KJQ4.2|ALPS_PORTR	8484	GO:0005576:cellular_component:extracellular region	GO:0042742:biological_process:defense response to bacterium
Locus_26233.0|BlastHit|gi|81904744|sp|Q9D1I6.1|RM14_MOUSE	8489	GO:0005739:cellular_component:mitochondrion	GO:0005840:cellular_component:ribosome	GO:0044822:molecular_function:poly(A) RNA binding	GO:0003735:molecular_function:structural constituent of ribosome	GO:0006412:biological_process:translation
Locus_26245.0|BlastHit|gi|67461064|sp|Q90744.1|NAGAB_CHICK	8517	GO:0005764:cellular_component:lysosome	GO:0008456:molecular_function:alpha-N-acetylgalactosaminidase activity	GO:0005975:biological_process:carbohydrate metabolic process
Locus_26275.0|BlastHit|gi|18203123|sp|Q9JJ80.2|RPF2_MOUSE	8534	GO:0005730:cellular_component:nucleolus
Locus_26280.0|BlastHit|gi|82200144|sp|Q6DEB1.1|AT2L1_XENLA	8537	GO:0005739:cellular_component:mitochondrion	GO:0050459:molecular_function:ethanolamine-phosphate phospho-lyase activity	GO:0030170:molecular_function:pyridoxal phosphate binding	GO:0008483:molecular_function:transaminase activity
Locus_26284.0|BlastHit|gi|129330|sp|P23636.1|PP2A2_SCHPO	8539	GO:0005737:cellular_component:cytoplasm	GO:0005829:cellular_component:cytosol	GO:0005634:cellular_component:nucleus	GO:0046872:molecular_function:metal ion binding	GO:0004721:molecular_function:phosphoprotein phosphatase activity	GO:0007067:biological_process:mitotic nuclear division	GO:0010972:biological_process:negative regulation of G2/M transition of mitotic cell cycle	GO:0045930:biological_process:negative regulation of mitotic cell cycle	GO:0006470:biological_process:protein dephosphorylation	GO:0007165:biological_process:signal transduction
Locus_26285.1|BlastHit|gi|62901525|sp|Q94900.2|GLUCL_DROME	8541	GO:0030054:cellular_component:cell junction	GO:0034707:cellular_component:chloride channel complex	GO:0016021:cellular_component:integral component of membrane	GO:0005886:cellular_component:plasma membrane	GO:0045211:cellular_component:postsynaptic membrane	GO:0008068:molecular_function:extracellular-glutamate-gated chloride channel activity	GO:1902476:biological_process:chloride transmembrane transport	GO:0006821:biological_process:chloride transport	GO:0048812:biological_process:neuron projection morphogenesis
Locus_26314.0|BlastHit|gi|12230002|sp|Q9VCA5.1|SYFB_DROME	8590	GO:0005737:cellular_component:cytoplasm	GO:0005524:molecular_function:ATP binding	GO:0000287:molecular_function:magnesium ion binding	GO:0004826:molecular_function:phenylalanine-tRNA ligase activity	GO:0003723:molecular_function:RNA binding	GO:0006432:biological_process:phenylalanyl-tRNA aminoacylation
Locus_26319.0|BlastHit|gi|74737109|sp|Q6P161.1|RM54_HUMAN	8594	GO:0005739:cellular_component:mitochondrion	GO:0005840:cellular_component:ribosome	GO:0044822:molecular_function:poly(A) RNA binding
Locus_26332.0|BlastHit|gi|82188721|sp|Q7ZVX6.1|UBA3_DANRE	8604	GO:0005829:cellular_component:cytosol	GO:0005634:cellular_component:nucleus	GO:0016881:molecular_function:acid-amino acid ligase activity	GO:0005524:molecular_function:ATP binding	GO:0019781:molecular_function:NEDD8 activating enzyme activity	GO:0045116:biological_process:protein neddylation
Locus_26337.0|BlastHit|gi|13959708|sp|O42130.2|TOP2A_CHICK	8609	GO:0005634:cellular_component:nucleus	GO:0005524:molecular_function:ATP binding	GO:0008301:molecular_function:DNA binding, bending	GO:0003918:molecular_function:DNA topoisomerase type II (ATP-hydrolyzing) activity	GO:0000287:molecular_function:magnesium ion binding	GO:0006200:biological_process:ATP catabolic process	GO:0006265:biological_process:DNA topological change
Locus_26343.0|BlastHit|gi|160358765|sp|Q5RCG1.2|TM192_PONAB	8614	GO:0016021:cellular_component:integral component of membrane	GO:0005770:cellular_component:late endosome	GO:0005765:cellular_component:lysosomal membrane
Locus_26351.0|BlastHit|gi|23396498|sp|Q96KP4.2|CNDP2_HUMAN	8618	GO:0005829:cellular_component:cytosol	GO:0070062:cellular_component:extracellular vesicular exosome	GO:0004180:molecular_function:carboxypeptidase activity	GO:0016805:molecular_function:dipeptidase activity	GO:0046872:molecular_function:metal ion binding	GO:0008237:molecular_function:metallopeptidase activity	GO:0008233:molecular_function:peptidase activity	GO:0034701:molecular_function:tripeptidase activity	GO:0006508:biological_process:proteolysis
Locus_26384.0|BlastHit|gi|62510647|sp|Q8HXY0.1|ETFA_MACFA	8670	GO:0005759:cellular_component:mitochondrial matrix	GO:0009055:molecular_function:electron carrier activity	GO:0050660:molecular_function:flavin adenine dinucleotide binding	GO:0055114:biological_process:oxidation-reduction process
Locus_26396.0|BlastHit|gi|82182892|sp|Q6DFI2.1|TM147_XENLA	8677	GO:0016021:cellular_component:integral component of membrane
Locus_26404.0|BlastHit|gi|68565154|sp|Q5ZJH7.1|CNPD1_CHICK	8685	GO:0016021:cellular_component:integral component of membrane	GO:0000079:biological_process:regulation of cyclin-dependent protein serine/threonine kinase activity
Locus_26414.0|BlastHit|gi|78099250|sp|Q5ZLF0.1|F10A1_CHICK	8695	GO:0005737:cellular_component:cytoplasm
Locus_26424.0|BlastHit|gi|12643402|sp|Q92506.2|DHB8_HUMAN	8708	GO:0005740:cellular_component:mitochondrial envelope	GO:0005759:cellular_component:mitochondrial matrix	GO:0005886:cellular_component:plasma membrane	GO:0003857:molecular_function:3-hydroxyacyl-CoA dehydrogenase activity	GO:0004303:molecular_function:estradiol 17-beta-dehydrogenase activity	GO:0047035:molecular_function:testosterone dehydrogenase (NAD+) activity	GO:0008209:biological_process:androgen metabolic process	GO:0006703:biological_process:estrogen biosynthetic process	GO:0006633:biological_process:fatty acid biosynthetic process
Locus_26447.0|BlastHit|gi|158564000|sp|Q9UHW5.2|GPN3_HUMAN	8723	GO:0043234:cellular_component:protein complex	GO:0005525:molecular_function:GTP binding
Locus_26474.0|BlastHit|gi|82237360|sp|Q6NZ13.1|NBL1_DANRE	8744	GO:0005576:cellular_component:extracellular region	GO:0060872:biological_process:semicircular canal development	GO:0060876:biological_process:semicircular canal formation
Locus_26479.1|BlastHit|gi|73920458|sp|Q6NWF4.2|VPS25_DANRE	8746	GO:0005737:cellular_component:cytoplasm	GO:0015031:biological_process:protein transport
Locus_26482.0|BlastHit|gi|73622264|sp|P14576.2|SRP54_MOUSE	8748	GO:0016607:cellular_component:nuclear speck	GO:0005786:cellular_component:signal recognition particle, endoplasmic reticulum targeting	GO:0008312:molecular_function:7S RNA binding	GO:0005525:molecular_function:GTP binding	GO:0003924:molecular_function:GTPase activity	GO:0006614:biological_process:SRP-dependent cotranslational protein targeting to membrane
Locus_26483.0|BlastHit|gi|88941977|sp|Q2YDF6.1|RT35_BOVIN	8749	GO:0005763:cellular_component:mitochondrial small ribosomal subunit	GO:0044822:molecular_function:poly(A) RNA binding
Locus_26490.0|BlastHit|gi|82184315|sp|Q6GNX5.1|TM203_XENLA	8752	GO:0016021:cellular_component:integral component of membrane
Locus_26490.0|BlastHit|gi|82184315|sp|Q6GNX5.1|TM203_XENLA	8752	GO:0005737:cellular_component:cytoplasm	GO:0005730:cellular_component:nucleolus	GO:0044822:molecular_function:poly(A) RNA binding	GO:0004526:molecular_function:ribonuclease P activity	GO:0008033:biological_process:tRNA processing
Locus_26501.0|BlastHit|gi|37999493|sp|Q13231.1|CHIT1_HUMAN	8761	GO:0005615:cellular_component:extracellular space	GO:0005764:cellular_component:lysosome	GO:0008061:molecular_function:chitin binding	GO:0004568:molecular_function:chitinase activity	GO:0008843:molecular_function:endochitinase activity	GO:0006032:biological_process:chitin catabolic process	GO:0006955:biological_process:immune response	GO:0000272:biological_process:polysaccharide catabolic process	GO:0009617:biological_process:response to bacterium
Locus_26507.0|BlastHit|gi|21431847|sp|Q15050.2|RRS1_HUMAN	8768	GO:0000794:cellular_component:condensed nuclear chromosome	GO:0005783:cellular_component:endoplasmic reticulum	GO:0005730:cellular_component:nucleolus	GO:0005634:cellular_component:nucleus	GO:0044822:molecular_function:poly(A) RNA binding	GO:0002244:biological_process:hematopoietic progenitor cell differentiation	GO:0007080:biological_process:mitotic metaphase plate congression	GO:0042254:biological_process:ribosome biogenesis
Locus_26512.0|BlastHit|gi|22653707|sp|Q9CQ36.1|DPOE4_MOUSE	8773	GO:0005671:cellular_component:Ada2/Gcn5/Ada3 transcription activator complex	GO:0008622:cellular_component:epsilon DNA polymerase complex	GO:0003887:molecular_function:DNA-directed DNA polymerase activity	GO:0043565:molecular_function:sequence-specific DNA binding	GO:0043966:biological_process:histone H3 acetylation
Locus_26522.0|BlastHit|gi|296452924|sp|Q9BTW9.2|TBCD_HUMAN	8781	GO:0005912:cellular_component:adherens junction	GO:0005737:cellular_component:cytoplasm	GO:0016328:cellular_component:lateral plasma membrane	GO:0005923:cellular_component:tight junction	GO:0048487:molecular_function:beta-tubulin binding	GO:0005096:molecular_function:GTPase activator activity	GO:0034333:biological_process:adherens junction assembly	GO:0010812:biological_process:negative regulation of cell-substrate adhesion	GO:0031115:biological_process:negative regulation of microtubule polymerization	GO:0043547:biological_process:positive regulation of GTPase activity	GO:0007023:biological_process:post-chaperonin tubulin folding pathway	GO:0006457:biological_process:protein folding	GO:0070830:biological_process:tight junction assembly
Locus_26522.0|BlastHit|gi|296452924|sp|Q9BTW9.2|TBCD_HUMAN	8781	GO:0005912:cellular_component:adherens junction	GO:0005737:cellular_component:cytoplasm	GO:0016328:cellular_component:lateral plasma membrane	GO:0005874:cellular_component:microtubule	GO:0005923:cellular_component:tight junction	GO:0048487:molecular_function:beta-tubulin binding	GO:0051087:molecular_function:chaperone binding	GO:0005096:molecular_function:GTPase activator activity	GO:0051084:biological_process:'de novo' posttranslational protein folding	GO:0034333:biological_process:adherens junction assembly	GO:0044267:biological_process:cellular protein metabolic process	GO:0010812:biological_process:negative regulation of cell-substrate adhesion	GO:0031115:biological_process:negative regulation of microtubule polymerization	GO:0043547:biological_process:positive regulation of GTPase activity	GO:0007023:biological_process:post-chaperonin tubulin folding pathway	GO:0006457:biological_process:protein folding	GO:0070830:biological_process:tight junction assembly
Locus_26524.0|BlastHit|gi|68565605|sp|Q96I82.1|KAZD1_HUMAN	8783	GO:0005576:cellular_component:extracellular region	GO:0004867:molecular_function:serine-type endopeptidase inhibitor activity	GO:0001558:biological_process:regulation of cell growth
Locus_26528.0|BlastHit|gi|123892602|sp|Q28DR7.1|DCTN6_XENTR	8790	GO:0000777:cellular_component:condensed chromosome kinetochore	GO:0005737:cellular_component:cytoplasm	GO:0005869:cellular_component:dynactin complex
Locus_26549.0|BlastHit|gi|75570321|sp|Q90ZY4.1|SBK1_DANRE	8810	GO:0005737:cellular_component:cytoplasm	GO:0005524:molecular_function:ATP binding	GO:0004672:molecular_function:protein kinase activity	GO:0004674:molecular_function:protein serine/threonine kinase activity
Locus_26558.0|BlastHit|gi|254763312|sp|Q9Z1P4.2|LGR5_MOUSE	8818	GO:0005576:cellular_component:extracellular region
Locus_26571.0|BlastHit|gi|2497623|sp|Q95028.1|LDH_DROME	8854	GO:0005737:cellular_component:cytoplasm	GO:0004459:molecular_function:L-lactate dehydrogenase activity	GO:0044262:biological_process:cellular carbohydrate metabolic process	GO:0007520:biological_process:myoblast fusion	GO:0007525:biological_process:somatic muscle development
Locus_26585.0|BlastHit|gi|82121035|sp|Q9YH58.1|FTCD_CHICK	8860	GO:0005814:cellular_component:centriole	GO:0005794:cellular_component:Golgi apparatus	GO:0005542:molecular_function:folic acid binding	GO:0030412:molecular_function:formimidoyltetrahydrofolate cyclodeaminase activity	GO:0030409:molecular_function:glutamate formimidoyltransferase activity	GO:0019556:biological_process:histidine catabolic process to glutamate and formamide	GO:0019557:biological_process:histidine catabolic process to glutamate and formate	GO:0035999:biological_process:tetrahydrofolate interconversion
Locus_26611.0|BlastHit|gi|123885682|sp|Q0IHI6.1|MED30_XENLA	8884	GO:0005634:cellular_component:nucleus	GO:0006355:biological_process:regulation of transcription, DNA-templated	GO:0006351:biological_process:transcription, DNA-templated
Locus_26612.0|BlastHit|gi|206729942|sp|O15550.2|KDM6A_HUMAN	8885	GO:0035097:cellular_component:histone methyltransferase complex	GO:0005634:cellular_component:nucleus	GO:0051213:molecular_function:dioxygenase activity	GO:0071558:molecular_function:histone demethylase activity (H3-K27 specific)	GO:0042802:molecular_function:identical protein binding	GO:0046872:molecular_function:metal ion binding	GO:0000978:molecular_function:RNA polymerase II core promoter proximal region sequence-specific DNA binding	GO:0060070:biological_process:canonical Wnt signaling pathway	GO:0072358:biological_process:cardiovascular system development	GO:0048568:biological_process:embryonic organ development	GO:0007507:biological_process:heart development	GO:0003007:biological_process:heart morphogenesis	GO:0001701:biological_process:in utero embryonic development	GO:0048333:biological_process:mesodermal cell differentiation	GO:0035264:biological_process:multicellular organism growth	GO:0001843:biological_process:neural tube closure	GO:0021915:biological_process:neural tube development	GO:0048570:biological_process:notochord morphogenesis	GO:0010468:biological_process:regulation of gene expression	GO:0003016:biological_process:respiratory system process	GO:0032525:biological_process:somite rostral/caudal axis specification
Locus_26613.0|BlastHit|gi|313104226|sp|Q3SXM5.3|HSDL1_HUMAN	8886	GO:0005739:cellular_component:mitochondrion	GO:0016491:molecular_function:oxidoreductase activity
Locus_26626.0|BlastHit|gi|205686171|sp|P85971.1|6PGL_RAT	8896	GO:0005737:cellular_component:cytoplasm	GO:0070062:cellular_component:extracellular vesicular exosome	GO:0017057:molecular_function:6-phosphogluconolactonase activity	GO:0048029:molecular_function:monosaccharide binding	GO:0009051:biological_process:pentose-phosphate shunt, oxidative branch
Locus_26628.0|BlastHit|gi|224487971|sp|B4KN00.1|EIF3C_DROMO	8898	GO:0016282:cellular_component:eukaryotic 43S preinitiation complex	GO:0033290:cellular_component:eukaryotic 48S preinitiation complex	GO:0005852:cellular_component:eukaryotic translation initiation factor 3 complex	GO:0003743:molecular_function:translation initiation factor activity	GO:0001731:biological_process:formation of translation preinitiation complex	GO:0006446:biological_process:regulation of translational initiation
Locus_26629.0|BlastHit|gi|75060492|sp|Q58DK5.1|HEM2_BOVIN	8899	GO:0070062:cellular_component:extracellular vesicular exosome	GO:0005634:cellular_component:nucleus	GO:0032791:molecular_function:lead ion binding	GO:0004655:molecular_function:porphobilinogen synthase activity	GO:0008270:molecular_function:zinc ion binding	GO:0071353:biological_process:cellular response to interleukin-4	GO:0006783:biological_process:heme biosynthetic process	GO:0051260:biological_process:protein homooligomerization	GO:0006782:biological_process:protoporphyrinogen IX biosynthetic process
Locus_26656.0|BlastHit|gi|8928355|sp|Q9VAN0.1|SERC_DROME	8927	GO:0004648:molecular_function:O-phospho-L-serine:2-oxoglutarate aminotransferase activity	GO:0030170:molecular_function:pyridoxal phosphate binding	GO:0006564:biological_process:L-serine biosynthetic process
Locus_26665.0|BlastHit|gi|20178134|sp|Q99MN1.1|SYK_MOUSE	8934	GO:0005739:cellular_component:mitochondrion	GO:0005524:molecular_function:ATP binding	GO:0004824:molecular_function:lysine-tRNA ligase activity	GO:0046872:molecular_function:metal ion binding	GO:0003676:molecular_function:nucleic acid binding	GO:0006430:biological_process:lysyl-tRNA aminoacylation
Locus_26665.0|BlastHit|gi|20178134|sp|Q99MN1.1|SYK_MOUSE	8934	GO:0005777:cellular_component:peroxisome	GO:0008445:molecular_function:D-aspartate oxidase activity
Locus_26666.0|BlastHit|gi|68565632|sp|Q5RBU7.1|PCP_PONAB	8935	GO:0005764:cellular_component:lysosome	GO:0004180:molecular_function:carboxypeptidase activity	GO:0008236:molecular_function:serine-type peptidase activity
Locus_26669.0|BlastHit|gi|5921197|sp|O43852.2|CALU_HUMAN	8937	GO:0005783:cellular_component:endoplasmic reticulum	GO:0005576:cellular_component:extracellular region	GO:0005794:cellular_component:Golgi apparatus	GO:0042470:cellular_component:melanosome	GO:0016020:cellular_component:membrane	GO:0033018:cellular_component:sarcoplasmic reticulum lumen	GO:0005509:molecular_function:calcium ion binding	GO:0007596:biological_process:blood coagulation	GO:0030168:biological_process:platelet activation	GO:0002576:biological_process:platelet degranulation
Locus_26698.0|BlastHit|gi|205831554|sp|Q7ZVF3.2|DHSA_DANRE	8962	GO:0005743:cellular_component:mitochondrial inner membrane	GO:0050660:molecular_function:flavin adenine dinucleotide binding	GO:0008177:molecular_function:succinate dehydrogenase (ubiquinone) activity	GO:0022904:biological_process:respiratory electron transport chain	GO:0006105:biological_process:succinate metabolic process	GO:0006099:biological_process:tricarboxylic acid cycle
Locus_26715.0|BlastHit|gi|51338704|sp|P62810.1|EXPI_MOUSE	8970	GO:0005576:cellular_component:extracellular region	GO:0030414:molecular_function:peptidase inhibitor activity	GO:0042742:biological_process:defense response to bacterium
Locus_26724.0|BlastHit|gi|34922660|sp|Q9U1N0.1|HRP65_CHITE	8976	GO:0005737:cellular_component:cytoplasm	GO:0005856:cellular_component:cytoskeleton	GO:0005634:cellular_component:nucleus	GO:0000166:molecular_function:nucleotide binding	GO:0003723:molecular_function:RNA binding	GO:0006406:biological_process:mRNA export from nucleus
Locus_26738.0|BlastHit|gi|62510508|sp|Q9CQA6.1|CHCH1_MOUSE	8988	GO:0005739:cellular_component:mitochondrion	GO:0005730:cellular_component:nucleolus	GO:0044822:molecular_function:poly(A) RNA binding
Locus_26740.0|BlastHit|gi|187657929|sp|A4FUD1.1|GPN1_BOVIN	8998	GO:0005737:cellular_component:cytoplasm	GO:0005525:molecular_function:GTP binding
Locus_26750.0|BlastHit|gi|1703290|sp|P55302.1|AMRP_MOUSE	9007	GO:0009986:cellular_component:cell surface	GO:0005576:cellular_component:extracellular region	GO:0005886:cellular_component:plasma membrane	GO:0048237:cellular_component:rough endoplasmic reticulum lumen	GO:0031982:cellular_component:vesicle	GO:0008201:molecular_function:heparin binding	GO:0050750:molecular_function:low-density lipoprotein particle receptor binding	GO:1900116:biological_process:extracellular negative regulation of signal transduction	GO:1900222:biological_process:negative regulation of beta-amyloid clearance	GO:0032091:biological_process:negative regulation of protein binding	GO:0010916:biological_process:negative regulation of very-low-density lipoprotein particle clearance
Locus_26787.0|BlastHit|gi|2501094|sp|Q63635.1|STX6_RAT	9028	GO:0005769:cellular_component:early endosome	GO:0005794:cellular_component:Golgi apparatus	GO:0000139:cellular_component:Golgi membrane	GO:0016021:cellular_component:integral component of membrane	GO:0048471:cellular_component:perinuclear region of cytoplasm	GO:0031201:cellular_component:SNARE complex	GO:0043195:cellular_component:terminal bouton	GO:0032588:cellular_component:trans-Golgi network membrane	GO:0005484:molecular_function:SNAP receptor activity	GO:0007032:biological_process:endosome organization	GO:0048193:biological_process:Golgi vesicle transport	GO:0006886:biological_process:intracellular protein transport	GO:0042147:biological_process:retrograde transport, endosome to Golgi	GO:0006906:biological_process:vesicle fusion	GO:0016192:biological_process:vesicle-mediated transport
Locus_26791.0|BlastHit|gi|224495055|sp|B0WTN3.1|EIF3M_CULQU	9030	GO:0016282:cellular_component:eukaryotic 43S preinitiation complex	GO:0033290:cellular_component:eukaryotic 48S preinitiation complex	GO:0005852:cellular_component:eukaryotic translation initiation factor 3 complex	GO:0003743:molecular_function:translation initiation factor activity	GO:0001731:biological_process:formation of translation preinitiation complex	GO:0006446:biological_process:regulation of translational initiation
Locus_26817.0|BlastHit|gi|113926|sp|P05140.2|ISP2_HEMAM	9063	GO:0005887:cellular_component:integral component of plasma membrane	GO:0030246:molecular_function:carbohydrate binding	GO:0004888:molecular_function:transmembrane signaling receptor activity	GO:0007166:biological_process:cell surface receptor signaling pathway	GO:0006952:biological_process:defense response	GO:0030220:biological_process:platelet formation
Locus_26818.0|BlastHit|gi|71153063|sp|Q7SXW4.1|TM111_DANRE	9064	GO:0072546:cellular_component:ER membrane protein complex	GO:0005794:cellular_component:Golgi apparatus	GO:0016021:cellular_component:integral component of membrane	GO:0030140:cellular_component:trans-Golgi network transport vesicle	GO:0045494:biological_process:photoreceptor cell maintenance	GO:0060041:biological_process:retina development in camera-type eye
Locus_26822.0|BlastHit|gi|74750974|sp|Q8N3Y7.2|RDHE2_HUMAN	9067	GO:0005789:cellular_component:endoplasmic reticulum membrane	GO:0016021:cellular_component:integral component of membrane	GO:0004745:molecular_function:retinol dehydrogenase activity	GO:0050908:biological_process:detection of light stimulus involved in visual perception	GO:0043616:biological_process:keratinocyte proliferation	GO:0042574:biological_process:retinal metabolic process	GO:0042572:biological_process:retinol metabolic process
Locus_26830.0|BlastHit|gi|2506252|sp|P12815.2|PDCD6_MOUSE	9076	GO:0005737:cellular_component:cytoplasm	GO:0031410:cellular_component:cytoplasmic vesicle	GO:0005789:cellular_component:endoplasmic reticulum membrane	GO:0005768:cellular_component:endosome	GO:0070062:cellular_component:extracellular vesicular exosome	GO:0031965:cellular_component:nuclear membrane	GO:0005634:cellular_component:nucleus	GO:0060090:molecular_function:binding, bridging	GO:0005509:molecular_function:calcium ion binding	GO:0004198:molecular_function:calcium-dependent cysteine-type endopeptidase activity	GO:0048306:molecular_function:calcium-dependent protein binding	GO:0046983:molecular_function:protein dimerization activity	GO:0042803:molecular_function:protein homodimerization activity	GO:0006919:biological_process:activation of cysteine-type endopeptidase activity involved in apoptotic process	GO:0001525:biological_process:angiogenesis	GO:0006915:biological_process:apoptotic process	GO:0034605:biological_process:cellular response to heat	GO:0006886:biological_process:intracellular protein transport	GO:0051898:biological_process:negative regulation of protein kinase B signaling	GO:0032007:biological_process:negative regulation of TOR signaling	GO:0030948:biological_process:negative regulation of vascular endothelial growth factor receptor signaling pathway	GO:0045766:biological_process:positive regulation of angiogenesis	GO:0010595:biological_process:positive regulation of endothelial cell migration	GO:0001938:biological_process:positive regulation of endothelial cell proliferation	GO:0006508:biological_process:proteolysis	GO:0051592:biological_process:response to calcium ion	GO:0036324:biological_process:vascular endothelial growth factor receptor-2 signaling pathway
Locus_26846.0|BlastHit|gi|51702213|sp|P63030.1|BR44L_MOUSE	9094	GO:0016021:cellular_component:integral component of membrane	GO:0005743:cellular_component:mitochondrial inner membrane	GO:0050833:molecular_function:pyruvate transmembrane transporter activity	GO:0006850:biological_process:mitochondrial pyruvate transport	GO:0006090:biological_process:pyruvate metabolic process
Locus_26847.0|BlastHit|gi|121990043|sp|Q295Y7.1|GMPPB_DROPS	9095	GO:0005525:molecular_function:GTP binding	GO:0004475:molecular_function:mannose-1-phosphate guanylyltransferase activity	GO:0009298:biological_process:GDP-mannose biosynthetic process
Locus_26850.0|BlastHit|gi|81896332|sp|Q8BJ51.1|MFS11_MOUSE	9098	GO:0016021:cellular_component:integral component of membrane
Locus_26852.0|BlastHit|gi|74870585|sp|Q9VRJ2.1|FITM_DROME	9100	GO:0005789:cellular_component:endoplasmic reticulum membrane	GO:0016021:cellular_component:integral component of membrane	GO:0019915:biological_process:lipid storage
Locus_26875.0|BlastHit|gi|48428798|sp|Q9I993.1|BCDO1_CHICK	9121	GO:0046872:molecular_function:metal ion binding	GO:0004497:molecular_function:monooxygenase activity	GO:0042572:biological_process:retinol metabolic process
Locus_26903.0|BlastHit|gi|341940518|sp|Q8VHK1.3|CSKI2_MOUSE	9137	GO:0005737:cellular_component:cytoplasm	GO:0019904:molecular_function:protein domain specific binding	GO:0007165:biological_process:signal transduction
Locus_26905.0|BlastHit|gi|1171633|sp|P46441.1|N2B_HAEIR	9138	GO:0005524:molecular_function:ATP binding
Locus_26922.0|BlastHit|gi|20141460|sp|P34275.2|IVD_CAEEL	9152	GO:0003995:molecular_function:acyl-CoA dehydrogenase activity	GO:0050660:molecular_function:flavin adenine dinucleotide binding	GO:0006552:biological_process:leucine catabolic process
Locus_26926.0|BlastHit|gi|32469796|sp|Q9YIB9.2|HIF1A_CHICK	9155	GO:0005829:cellular_component:cytosol	GO:0005634:cellular_component:nucleus	GO:0003677:molecular_function:DNA binding	GO:0035035:molecular_function:histone acetyltransferase binding	GO:0003700:molecular_function:sequence-specific DNA binding transcription factor activity	GO:0004871:molecular_function:signal transducer activity	GO:0019896:biological_process:axon transport of mitochondrion	GO:0071456:biological_process:cellular response to hypoxia	GO:0045944:biological_process:positive regulation of transcription from RNA polymerase II promoter	GO:0061419:biological_process:positive regulation of transcription from RNA polymerase II promoter in response to hypoxia	GO:0045893:biological_process:positive regulation of transcription, DNA-templated	GO:0010575:biological_process:positive regulation vascular endothelial growth factor production	GO:0001666:biological_process:response to hypoxia	GO:0006351:biological_process:transcription, DNA-templated
Locus_26930.1|BlastHit|gi|114150027|sp|Q3SZM1.1|MK67I_BOVIN	9160	GO:0000794:cellular_component:condensed nuclear chromosome	GO:0005737:cellular_component:cytoplasm	GO:0005730:cellular_component:nucleolus	GO:0005654:cellular_component:nucleoplasm	GO:0000166:molecular_function:nucleotide binding	GO:0044822:molecular_function:poly(A) RNA binding	GO:0010923:biological_process:negative regulation of phosphatase activity
Locus_26944.0|BlastHit|gi|1703235|sp|P15122.3|ALDR_RABIT	9171	GO:0005829:cellular_component:cytosol	GO:0070062:cellular_component:extracellular vesicular exosome	GO:0005764:cellular_component:lysosome	GO:0004033:molecular_function:aldo-keto reductase (NADP) activity	GO:0045550:molecular_function:geranylgeranyl reductase activity	GO:0047718:molecular_function:indanol dehydrogenase activity	GO:0001758:molecular_function:retinal dehydrogenase activity	GO:0006081:biological_process:cellular aldehyde metabolic process	GO:0044597:biological_process:daunorubicin metabolic process	GO:0007586:biological_process:digestion	GO:0044598:biological_process:doxorubicin metabolic process	GO:0016488:biological_process:farnesol catabolic process	GO:0007603:biological_process:phototransduction, visible light	GO:0001523:biological_process:retinoid metabolic process	GO:0008202:biological_process:steroid metabolic process
Locus_26990.0|BlastHit|gi|120742|sp|P08059.3|G6PI_PIG	9209	GO:0005737:cellular_component:cytoplasm	GO:0004347:molecular_function:glucose-6-phosphate isomerase activity	GO:0006094:biological_process:gluconeogenesis	GO:0006096:biological_process:glycolytic process
Locus_26998.0|BlastHit|gi|81908014|sp|Q4VAA7.1|SNX33_MOUSE	9220	GO:0016023:cellular_component:cytoplasmic membrane-bounded vesicle	GO:0030659:cellular_component:cytoplasmic vesicle membrane	GO:0005829:cellular_component:cytosol	GO:0005768:cellular_component:endosome	GO:0019898:cellular_component:extrinsic component of membrane	GO:0035091:molecular_function:phosphatidylinositol binding	GO:0036089:biological_process:cleavage furrow formation	GO:0006897:biological_process:endocytosis	GO:0016197:biological_process:endosomal transport	GO:0007032:biological_process:endosome organization	GO:0006886:biological_process:intracellular protein transport	GO:0044351:biological_process:macropinocytosis	GO:0097320:biological_process:membrane tubulation	GO:0000281:biological_process:mitotic cytokinesis	GO:0007067:biological_process:mitotic nuclear division
Locus_27014.0|BlastHit|gi|117949389|sp|Q6YHK3.2|CD109_HUMAN	9244	GO:0031225:cellular_component:anchored component of membrane	GO:0009986:cellular_component:cell surface	GO:0005615:cellular_component:extracellular space	GO:0005886:cellular_component:plasma membrane	GO:0004867:molecular_function:serine-type endopeptidase inhibitor activity	GO:0050431:molecular_function:transforming growth factor beta binding	GO:0030512:biological_process:negative regulation of transforming growth factor beta receptor signaling pathway	GO:0061045:biological_process:negative regulation of wound healing
Locus_27035.0|BlastHit|gi|75027676|sp|Q9VXG4.1|ANX11_DROME	9261	GO:0042470:cellular_component:melanosome	GO:0030496:cellular_component:midbody	GO:0005635:cellular_component:nuclear envelope	GO:0005654:cellular_component:nucleoplasm	GO:0005819:cellular_component:spindle	GO:0005509:molecular_function:calcium ion binding	GO:0005544:molecular_function:calcium-dependent phospholipid binding	GO:0044548:molecular_function:S100 protein binding	GO:0007109:biological_process:cytokinesis, completion of separation
Locus_27055.0|BlastHit|gi|18202857|sp|Q9DC48.1|PRP17_MOUSE	9275	GO:0071013:cellular_component:catalytic step 2 spliceosome	GO:0044822:molecular_function:poly(A) RNA binding	GO:0006397:biological_process:mRNA processing	GO:0008380:biological_process:RNA splicing
Locus_27068.0|BlastHit|gi|306526267|sp|Q6TH47.3|STBPA_DANRE	9287	GO:0032154:cellular_component:cleavage furrow	GO:0005737:cellular_component:cytoplasm	GO:0005769:cellular_component:early endosome	GO:0070062:cellular_component:extracellular vesicular exosome	GO:0005634:cellular_component:nucleus	GO:0005886:cellular_component:plasma membrane	GO:0046872:molecular_function:metal ion binding	GO:0008237:molecular_function:metallopeptidase activity	GO:0004843:molecular_function:ubiquitin-specific protease activity	GO:0007259:biological_process:JAK-STAT cascade	GO:0000281:biological_process:mitotic cytokinesis	GO:0043524:biological_process:negative regulation of neuron apoptotic process	GO:0014067:biological_process:negative regulation of phosphatidylinositol 3-kinase signaling	GO:0046580:biological_process:negative regulation of Ras protein signal transduction	GO:0008284:biological_process:positive regulation of cell proliferation	GO:0016579:biological_process:protein deubiquitination
Locus_27071.0|BlastHit|gi|341940967|sp|Q810V0.2|MPP10_MOUSE	9334	GO:0034457:cellular_component:Mpp10 complex	GO:0032040:cellular_component:small-subunit processome	GO:0000480:biological_process:endonucleolytic cleavage in 5'-ETS of tricistronic rRNA transcript (SSU-rRNA, 5.8S rRNA, LSU-rRNA)	GO:0000447:biological_process:endonucleolytic cleavage in ITS1 to separate SSU-rRNA from 5.8S rRNA and LSU-rRNA from tricistronic rRNA transcript (SSU-rRNA, 5.8S rRNA, LSU-rRNA)	GO:0000472:biological_process:endonucleolytic cleavage to generate mature 5'-end of SSU-rRNA from (SSU-rRNA, 5.8S rRNA, LSU-rRNA)
Locus_27088.0|BlastHit|gi|172046804|sp|Q4QRK0.2|AMPM1_DANRE	9349	GO:0022626:cellular_component:cytosolic ribosome	GO:0046872:molecular_function:metal ion binding	GO:0070006:molecular_function:metalloaminopeptidase activity	GO:0070084:biological_process:protein initiator methionine removal
Locus_27088.0|BlastHit|gi|172046804|sp|Q4QRK0.2|AMPM1_DANRE	9349	GO:0005737:cellular_component:cytoplasm	GO:0070062:cellular_component:extracellular vesicular exosome	GO:0016021:cellular_component:integral component of membrane	GO:0043231:cellular_component:intracellular membrane-bounded organelle	GO:0005741:cellular_component:mitochondrial outer membrane	GO:0005739:cellular_component:mitochondrion	GO:0031965:cellular_component:nuclear membrane	GO:0008503:molecular_function:benzodiazepine receptor activity	GO:0015485:molecular_function:cholesterol binding	GO:0006820:biological_process:anion transport	GO:0006915:biological_process:apoptotic process	GO:0008283:biological_process:cell proliferation	GO:0006783:biological_process:heme biosynthetic process	GO:0006869:biological_process:lipid transport	GO:0006626:biological_process:protein targeting to mitochondrion	GO:0032374:biological_process:regulation of cholesterol transport	GO:0008202:biological_process:steroid metabolic process	GO:0007268:biological_process:synaptic transmission
Locus_27098.0|BlastHit|gi|110815927|sp|Q60GF7.2|PIGX_RAT	9356	GO:0005789:cellular_component:endoplasmic reticulum membrane	GO:0016021:cellular_component:integral component of membrane	GO:0006506:biological_process:GPI anchor biosynthetic process
Locus_27131.0|BlastHit|gi|74866395|sp|Q94521.1|DNAT_DROME	9396	GO:0005737:cellular_component:cytoplasm	GO:0004059:molecular_function:aralkylamine N-acetyltransferase activity	GO:0004060:molecular_function:arylamine N-acetyltransferase activity	GO:0008080:molecular_function:N-acetyltransferase activity	GO:0006584:biological_process:catecholamine metabolic process	GO:0048066:biological_process:developmental pigmentation	GO:0042420:biological_process:dopamine catabolic process	GO:0030187:biological_process:melatonin biosynthetic process	GO:0046334:biological_process:octopamine catabolic process	GO:0045187:biological_process:regulation of circadian sleep/wake cycle, sleep	GO:0042429:biological_process:serotonin catabolic process	GO:0030431:biological_process:sleep
Locus_27148.0|BlastHit|gi|296439445|sp|Q07075.3|AMPE_HUMAN	9417	GO:0045177:cellular_component:apical part of cell	GO:0016324:cellular_component:apical plasma membrane	GO:0005903:cellular_component:brush border	GO:0031410:cellular_component:cytoplasmic vesicle	GO:0009897:cellular_component:external side of plasma membrane	GO:0070062:cellular_component:extracellular vesicular exosome	GO:0005887:cellular_component:integral component of plasma membrane	GO:0005765:cellular_component:lysosomal membrane	GO:0005886:cellular_component:plasma membrane	GO:0004177:molecular_function:aminopeptidase activity	GO:0070006:molecular_function:metalloaminopeptidase activity	GO:0008237:molecular_function:metallopeptidase activity	GO:0008270:molecular_function:zinc ion binding	GO:0001525:biological_process:angiogenesis	GO:0002005:biological_process:angiotensin catabolic process in blood	GO:0002003:biological_process:angiotensin maturation	GO:0016477:biological_process:cell migration	GO:0008283:biological_process:cell proliferation	GO:0007267:biological_process:cell-cell signaling	GO:0044267:biological_process:cellular protein metabolic process	GO:0032835:biological_process:glomerulus development	GO:0003081:biological_process:regulation of systemic arterial blood pressure by renin-angiotensin
Locus_27152.0|BlastHit|gi|112971|sp|P00504.3|AATC_CHICK	9421	GO:0005829:cellular_component:cytosol	GO:0004069:molecular_function:L-aspartate:2-oxoglutarate aminotransferase activity	GO:0047801:molecular_function:L-cysteine:2-oxoglutarate aminotransferase activity	GO:0080130:molecular_function:L-phenylalanine:2-oxoglutarate aminotransferase activity	GO:0030170:molecular_function:pyridoxal phosphate binding	GO:0006103:biological_process:2-oxoglutarate metabolic process	GO:0006531:biological_process:aspartate metabolic process	GO:0005975:biological_process:carbohydrate metabolic process	GO:0008652:biological_process:cellular amino acid biosynthetic process	GO:0006520:biological_process:cellular amino acid metabolic process	GO:0006094:biological_process:gluconeogenesis	GO:0006536:biological_process:glutamate metabolic process	GO:0006114:biological_process:glycerol biosynthetic process	GO:0044281:biological_process:small molecule metabolic process
Locus_27163.0|BlastHit|gi|158514279|sp|A5D8M6.1|SBDS_XENLA	9431	GO:0005737:cellular_component:cytoplasm	GO:0005730:cellular_component:nucleolus	GO:0005654:cellular_component:nucleoplasm	GO:0000922:cellular_component:spindle pole	GO:0043022:molecular_function:ribosome binding	GO:0008283:biological_process:cell proliferation	GO:0042256:biological_process:mature ribosome assembly
Locus_27182.0|BlastHit|gi|123781627|sp|Q499P8.1|CP058_RAT	9450	GO:0004556:molecular_function:alpha-amylase activity	GO:0046872:molecular_function:metal ion binding	GO:0005975:biological_process:carbohydrate metabolic process
Locus_27182.0|BlastHit|gi|123781627|sp|Q499P8.1|CP058_RAT	9450	GO:0016021:cellular_component:integral component of membrane
Locus_27198.0|BlastHit|gi|110825729|sp|P05661.4|MYSA_DROME	9467	GO:0031672:cellular_component:A band	GO:0016459:cellular_component:myosin complex	GO:0032982:cellular_component:myosin filament	GO:0005703:cellular_component:polytene chromosome puff	GO:0030017:cellular_component:sarcomere	GO:0030898:molecular_function:actin-dependent ATPase activity	GO:0005524:molecular_function:ATP binding	GO:0042623:molecular_function:ATPase activity, coupled	GO:0003774:molecular_function:motor activity	GO:0042803:molecular_function:protein homodimerization activity	GO:0008307:molecular_function:structural constituent of muscle	GO:0007527:biological_process:adult somatic muscle development	GO:0006200:biological_process:ATP catabolic process	GO:0007298:biological_process:border follicle cell migration	GO:0007427:biological_process:epithelial cell migration, open tracheal system	GO:0060361:biological_process:flight	GO:0040011:biological_process:locomotion	GO:0042692:biological_process:muscle cell differentiation	GO:0006936:biological_process:muscle contraction	GO:0007517:biological_process:muscle organ development	GO:0030239:biological_process:myofibril assembly	GO:0031033:biological_process:myosin filament organization	GO:0050821:biological_process:protein stabilization	GO:0045214:biological_process:sarcomere organization	GO:0030241:biological_process:skeletal muscle myosin thick filament assembly
Locus_27198.0|BlastHit|gi|110825729|sp|P05661.4|MYSA_DROME	9468	GO:0031672:cellular_component:A band	GO:0016459:cellular_component:myosin complex	GO:0032982:cellular_component:myosin filament	GO:0005703:cellular_component:polytene chromosome puff	GO:0030017:cellular_component:sarcomere	GO:0030898:molecular_function:actin-dependent ATPase activity	GO:0005524:molecular_function:ATP binding	GO:0042623:molecular_function:ATPase activity, coupled	GO:0003774:molecular_function:motor activity	GO:0042803:molecular_function:protein homodimerization activity	GO:0008307:molecular_function:structural constituent of muscle	GO:0007527:biological_process:adult somatic muscle development	GO:0006200:biological_process:ATP catabolic process	GO:0007298:biological_process:border follicle cell migration	GO:0007427:biological_process:epithelial cell migration, open tracheal system	GO:0060361:biological_process:flight	GO:0040011:biological_process:locomotion	GO:0042692:biological_process:muscle cell differentiation	GO:0006936:biological_process:muscle contraction	GO:0007517:biological_process:muscle organ development	GO:0030239:biological_process:myofibril assembly	GO:0031033:biological_process:myosin filament organization	GO:0050821:biological_process:protein stabilization	GO:0045214:biological_process:sarcomere organization	GO:0030241:biological_process:skeletal muscle myosin thick filament assembly
Locus_27198.0|BlastHit|gi|110825729|sp|P05661.4|MYSA_DROME	9469	GO:0031672:cellular_component:A band	GO:0016459:cellular_component:myosin complex	GO:0032982:cellular_component:myosin filament	GO:0005703:cellular_component:polytene chromosome puff	GO:0030017:cellular_component:sarcomere	GO:0030898:molecular_function:actin-dependent ATPase activity	GO:0005524:molecular_function:ATP binding	GO:0042623:molecular_function:ATPase activity, coupled	GO:0003774:molecular_function:motor activity	GO:0042803:molecular_function:protein homodimerization activity	GO:0008307:molecular_function:structural constituent of muscle	GO:0007527:biological_process:adult somatic muscle development	GO:0006200:biological_process:ATP catabolic process	GO:0007298:biological_process:border follicle cell migration	GO:0007427:biological_process:epithelial cell migration, open tracheal system	GO:0060361:biological_process:flight	GO:0040011:biological_process:locomotion	GO:0042692:biological_process:muscle cell differentiation	GO:0006936:biological_process:muscle contraction	GO:0007517:biological_process:muscle organ development	GO:0030239:biological_process:myofibril assembly	GO:0031033:biological_process:myosin filament organization	GO:0050821:biological_process:protein stabilization	GO:0045214:biological_process:sarcomere organization	GO:0030241:biological_process:skeletal muscle myosin thick filament assembly
Locus_27198.0|BlastHit|gi|110825729|sp|P05661.4|MYSA_DROME	9471	GO:0031672:cellular_component:A band	GO:0016459:cellular_component:myosin complex	GO:0032982:cellular_component:myosin filament	GO:0005703:cellular_component:polytene chromosome puff	GO:0030017:cellular_component:sarcomere	GO:0030898:molecular_function:actin-dependent ATPase activity	GO:0005524:molecular_function:ATP binding	GO:0042623:molecular_function:ATPase activity, coupled	GO:0003774:molecular_function:motor activity	GO:0042803:molecular_function:protein homodimerization activity	GO:0008307:molecular_function:structural constituent of muscle	GO:0007527:biological_process:adult somatic muscle development	GO:0006200:biological_process:ATP catabolic process	GO:0007298:biological_process:border follicle cell migration	GO:0007427:biological_process:epithelial cell migration, open tracheal system	GO:0060361:biological_process:flight	GO:0040011:biological_process:locomotion	GO:0042692:biological_process:muscle cell differentiation	GO:0006936:biological_process:muscle contraction	GO:0007517:biological_process:muscle organ development	GO:0030239:biological_process:myofibril assembly	GO:0031033:biological_process:myosin filament organization	GO:0050821:biological_process:protein stabilization	GO:0045214:biological_process:sarcomere organization	GO:0030241:biological_process:skeletal muscle myosin thick filament assembly
Locus_27230.0|BlastHit|gi|2851430|sp|P12646.2|G6PD_DROME	9503	GO:0004345:molecular_function:glucose-6-phosphate dehydrogenase activity	GO:0050661:molecular_function:NADP binding	GO:0051156:biological_process:glucose 6-phosphate metabolic process	GO:0006739:biological_process:NADP metabolic process	GO:0006098:biological_process:pentose-phosphate shunt
Locus_27235.0|BlastHit|gi|82179688|sp|Q5PQ71.1|ISOC2_XENLA	9509	GO:0005739:cellular_component:mitochondrion	GO:0003824:molecular_function:catalytic activity
Locus_27258.0|BlastHit|gi|81898164|sp|Q8BZA9.1|TIGAR_MOUSE	9550	GO:0005509:molecular_function:calcium ion binding
Locus_27258.0|BlastHit|gi|81898164|sp|Q8BZA9.1|TIGAR_MOUSE	9550	GO:0005622:cellular_component:intracellular	GO:0004331:molecular_function:fructose-2,6-bisphosphate 2-phosphatase activity	GO:0060576:biological_process:intestinal epithelial cell development	GO:1901525:biological_process:negative regulation of macromitophagy	GO:2000378:biological_process:negative regulation of reactive oxygen species metabolic process	GO:0010666:biological_process:positive regulation of cardiac muscle cell apoptotic process	GO:0010332:biological_process:response to gamma radiation	GO:0009410:biological_process:response to xenobiotic stimulus
Locus_27260.0|BlastHit|gi|2497676|sp|Q24400.1|MLP2_DROME	9556	GO:0005634:cellular_component:nucleus	GO:0030018:cellular_component:Z disc	GO:0008307:molecular_function:structural constituent of muscle	GO:0008270:molecular_function:zinc ion binding	GO:0007517:biological_process:muscle organ development	GO:0060537:biological_process:muscle tissue development	GO:0090175:biological_process:regulation of establishment of planar polarity	GO:0045214:biological_process:sarcomere organization
Locus_27261.0|BlastHit|gi|115503757|sp|Q7YQK3.2|4F2_RABIT	9557	GO:0016324:cellular_component:apical plasma membrane	GO:0030054:cellular_component:cell junction	GO:0016021:cellular_component:integral component of membrane	GO:0042470:cellular_component:melanosome	GO:0005634:cellular_component:nucleus	GO:0003824:molecular_function:catalytic activity	GO:0043169:molecular_function:cation binding	GO:0015175:molecular_function:neutral amino acid transmembrane transporter activity	GO:0005975:biological_process:carbohydrate metabolic process	GO:0060356:biological_process:leucine import	GO:0015827:biological_process:tryptophan transport
Locus_27266.1|BlastHit|gi|27734299|sp|Q27319.1|GELS_HOMAM	9563	GO:0005737:cellular_component:cytoplasm	GO:0005856:cellular_component:cytoskeleton	GO:0046872:molecular_function:metal ion binding	GO:0051693:biological_process:actin filament capping
Locus_27276.0|BlastHit|gi|12644364|sp|P91929.2|NDUAA_DROME	9577	GO:0005811:cellular_component:lipid particle	GO:0005759:cellular_component:mitochondrial matrix	GO:0005739:cellular_component:mitochondrion	GO:0070469:cellular_component:respiratory chain	GO:0005524:molecular_function:ATP binding	GO:0019206:molecular_function:nucleoside kinase activity	GO:0055114:biological_process:oxidation-reduction process
Locus_27281.0|BlastHit|gi|82233961|sp|Q5ZME8.1|SMU1_CHICK	9591	GO:0005737:cellular_component:cytoplasm	GO:0005634:cellular_component:nucleus
Locus_27301.0|BlastHit|gi|313471772|sp|A1ZA47.2|ZASP_DROME	9604	GO:0015629:cellular_component:actin cytoskeleton	GO:0005927:cellular_component:muscle tendon junction	GO:0030018:cellular_component:Z disc	GO:0003779:molecular_function:actin binding	GO:0051371:molecular_function:muscle alpha-actinin binding	GO:0008270:molecular_function:zinc ion binding	GO:0061061:biological_process:muscle structure development	GO:0030239:biological_process:myofibril assembly	GO:0001952:biological_process:regulation of cell-matrix adhesion
Locus_27310.0|BlastHit|gi|81912107|sp|Q7TQ20.1|DNJC2_RAT	9615	GO:0005829:cellular_component:cytosol	GO:0031965:cellular_component:nuclear membrane	GO:0005634:cellular_component:nucleus	GO:0003682:molecular_function:chromatin binding	GO:0003677:molecular_function:DNA binding	GO:0042393:molecular_function:histone binding	GO:0044822:molecular_function:poly(A) RNA binding	GO:0043130:molecular_function:ubiquitin binding	GO:0016568:biological_process:chromatin modification	GO:0006260:biological_process:DNA replication	GO:0030308:biological_process:negative regulation of cell growth	GO:2000279:biological_process:negative regulation of DNA biosynthetic process	GO:0045893:biological_process:positive regulation of transcription, DNA-templated	GO:0006351:biological_process:transcription, DNA-templated
Locus_27319.0|BlastHit|gi|3913352|sp|Q27712.1|CP2L1_PANAR	9618	GO:0005789:cellular_component:endoplasmic reticulum membrane	GO:0070330:molecular_function:aromatase activity	GO:0020037:molecular_function:heme binding	GO:0005506:molecular_function:iron ion binding
Locus_27326.0|BlastHit|gi|13123993|sp|Q9VCE1.1|BECN1_DROME	9624	GO:0034271:cellular_component:phosphatidylinositol 3-kinase complex, class III, type I	GO:0048102:biological_process:autophagic cell death	GO:0006914:biological_process:autophagy	GO:0050829:biological_process:defense response to Gram-negative bacterium	GO:0006897:biological_process:endocytosis	GO:0030097:biological_process:hemopoiesis	GO:0035096:biological_process:larval midgut cell programmed cell death	GO:0045824:biological_process:negative regulation of innate immune response	GO:0009306:biological_process:protein secretion	GO:0006979:biological_process:response to oxidative stress	GO:0035071:biological_process:salivary gland cell autophagic cell death
Locus_27333.0|BlastHit|gi|585180|sp|P38040.1|GBG1_DROME	9629	GO:0005834:cellular_component:heterotrimeric G-protein complex	GO:0005886:cellular_component:plasma membrane	GO:0003924:molecular_function:GTPase activity	GO:0004871:molecular_function:signal transducer activity	GO:0007015:biological_process:actin filament organization	GO:0045176:biological_process:apical protein localization	GO:0055059:biological_process:asymmetric neuroblast division	GO:0007155:biological_process:cell adhesion	GO:0061343:biological_process:cell adhesion involved in heart morphogenesis	GO:0007391:biological_process:dorsal closure	GO:0035050:biological_process:embryonic heart tube development	GO:0007186:biological_process:G-protein coupled receptor signaling pathway	GO:0006184:biological_process:GTP catabolic process	GO:0003015:biological_process:heart process	GO:0022008:biological_process:neurogenesis	GO:0007637:biological_process:proboscis extension reflex	GO:0008360:biological_process:regulation of cell shape
Locus_27349.0|BlastHit|gi|75040807|sp|Q5NVR2.1|MDHM_PONAB	9652	GO:0005759:cellular_component:mitochondrial matrix	GO:0030060:molecular_function:L-malate dehydrogenase activity	GO:0044262:biological_process:cellular carbohydrate metabolic process	GO:0006475:biological_process:internal protein amino acid acetylation	GO:0006108:biological_process:malate metabolic process	GO:0006099:biological_process:tricarboxylic acid cycle
Locus_27365.0|BlastHit|gi|118573678|sp|Q3ZBF3.2|RM38_BOVIN	9659	GO:0005739:cellular_component:mitochondrion	GO:0005840:cellular_component:ribosome
Locus_27368.0|BlastHit|gi|81896112|sp|Q8BHG2.1|CA123_MOUSE	9662	GO:0070062:cellular_component:extracellular vesicular exosome
Locus_27374.0|BlastHit|gi|92090643|sp|Q9EQS0.2|TALDO_RAT	9666	GO:0005759:cellular_component:mitochondrial matrix	GO:0070469:cellular_component:respiratory chain	GO:0003824:molecular_function:catalytic activity	GO:0050662:molecular_function:coenzyme binding	GO:0055114:biological_process:oxidation-reduction process
Locus_27374.0|BlastHit|gi|92090643|sp|Q9EQS0.2|TALDO_RAT	9666	GO:0005829:cellular_component:cytosol	GO:0043231:cellular_component:intracellular membrane-bounded organelle	GO:0030246:molecular_function:carbohydrate binding	GO:0048029:molecular_function:monosaccharide binding	GO:0004801:molecular_function:sedoheptulose-7-phosphate:D-glyceraldehyde-3-phosphate glyceronetransferase activity	GO:0006002:biological_process:fructose 6-phosphate metabolic process	GO:0019682:biological_process:glyceraldehyde-3-phosphate metabolic process	GO:0006098:biological_process:pentose-phosphate shunt	GO:0009052:biological_process:pentose-phosphate shunt, non-oxidative branch
Locus_27398.1|BlastHit|gi|311033537|sp|A5PLL7.3|TM189_HUMAN	9687	GO:0005789:cellular_component:endoplasmic reticulum membrane	GO:0016021:cellular_component:integral component of membrane
Locus_27403.0|BlastHit|gi|1730896|sp|P48053.2|YPD1_CAEEL	9691	GO:0003824:molecular_function:catalytic activity	GO:0046872:molecular_function:metal ion binding
Locus_27404.0|BlastHit|gi|73622102|sp|Q8TCF1.1|ZFAN1_HUMAN	9692	GO:0005680:cellular_component:anaphase-promoting complex	GO:0007067:biological_process:mitotic nuclear division	GO:0070979:biological_process:protein K11-linked ubiquitination
Locus_27404.0|BlastHit|gi|73622102|sp|Q8TCF1.1|ZFAN1_HUMAN	9692	GO:0008270:molecular_function:zinc ion binding
Locus_27440.0|BlastHit|gi|172045566|sp|P11024.3|NNTM_BOVIN	9726	GO:0016021:cellular_component:integral component of membrane	GO:0005743:cellular_component:mitochondrial inner membrane	GO:0008750:molecular_function:NAD(P)+ transhydrogenase (AB-specific) activity	GO:0050661:molecular_function:NADP binding	GO:0015992:biological_process:proton transport	GO:0072593:biological_process:reactive oxygen species metabolic process
Locus_27462.0|BlastHit|gi|73919326|sp|Q5RJU0.1|SNF8_XENTR	9750	GO:0005789:cellular_component:endoplasmic reticulum membrane	GO:0016021:cellular_component:integral component of membrane	GO:0004745:molecular_function:retinol dehydrogenase activity	GO:0050908:biological_process:detection of light stimulus involved in visual perception	GO:0043616:biological_process:keratinocyte proliferation	GO:0042574:biological_process:retinal metabolic process	GO:0042572:biological_process:retinol metabolic process
Locus_27462.0|BlastHit|gi|73919326|sp|Q5RJU0.1|SNF8_XENTR	9750	GO:0005737:cellular_component:cytoplasm	GO:0015031:biological_process:protein transport
Locus_27489.0|BlastHit|gi|22001930|sp|Q9VHN6.1|RM19_DROME	9794	GO:0005762:cellular_component:mitochondrial large ribosomal subunit	GO:0003735:molecular_function:structural constituent of ribosome	GO:0006412:biological_process:translation
Locus_27493.0|BlastHit|gi|51701959|sp|Q6PFR5.1|TRA2A_MOUSE	9795	GO:0005634:cellular_component:nucleus	GO:0042802:molecular_function:identical protein binding	GO:0000166:molecular_function:nucleotide binding	GO:0003723:molecular_function:RNA binding	GO:0006397:biological_process:mRNA processing	GO:0008380:biological_process:RNA splicing
Locus_27493.0|BlastHit|gi|51701959|sp|Q6PFR5.1|TRA2A_MOUSE	9796	GO:0005634:cellular_component:nucleus	GO:0042802:molecular_function:identical protein binding	GO:0000166:molecular_function:nucleotide binding	GO:0003723:molecular_function:RNA binding	GO:0006397:biological_process:mRNA processing	GO:0008380:biological_process:RNA splicing
Locus_27503.0|BlastHit|gi|19855045|sp|O08849.2|RGS2_MOUSE	9815	GO:0005737:cellular_component:cytoplasm	GO:0009898:cellular_component:cytoplasmic side of plasma membrane	GO:0005829:cellular_component:cytosol	GO:0043005:cellular_component:neuron projection	GO:0005730:cellular_component:nucleolus	GO:0005634:cellular_component:nucleus	GO:0005886:cellular_component:plasma membrane	GO:0005096:molecular_function:GTPase activator activity	GO:0050873:biological_process:brown fat cell differentiation	GO:0007049:biological_process:cell cycle	GO:0007186:biological_process:G-protein coupled receptor signaling pathway	GO:0043951:biological_process:negative regulation of cAMP-mediated signaling	GO:0010614:biological_process:negative regulation of cardiac muscle hypertrophy	GO:0045744:biological_process:negative regulation of G-protein coupled receptor protein signaling pathway	GO:0043407:biological_process:negative regulation of MAP kinase activity	GO:0010519:biological_process:negative regulation of phospholipase activity	GO:0060452:biological_process:positive regulation of cardiac muscle contraction	GO:0031116:biological_process:positive regulation of microtubule polymerization	GO:0071877:biological_process:regulation of adrenergic receptor signaling pathway	GO:0006417:biological_process:regulation of translation	GO:0055119:biological_process:relaxation of cardiac muscle	GO:0060087:biological_process:relaxation of vascular smooth muscle	GO:0007283:biological_process:spermatogenesis	GO:0038032:biological_process:termination of G-protein coupled receptor signaling pathway
Locus_27513.0|BlastHit|gi|82583720|sp|O01761.3|UNC89_CAEEL	9832	GO:0031672:cellular_component:A band	GO:0031430:cellular_component:M band	GO:0005524:molecular_function:ATP binding	GO:0019902:molecular_function:phosphatase binding	GO:0004672:molecular_function:protein kinase activity	GO:0017048:molecular_function:Rho GTPase binding	GO:0005089:molecular_function:Rho guanyl-nucleotide exchange factor activity	GO:0031034:biological_process:myosin filament assembly	GO:0032321:biological_process:positive regulation of Rho GTPase activity	GO:0030241:biological_process:skeletal muscle myosin thick filament assembly
Locus_27513.0|BlastHit|gi|82583720|sp|O01761.3|UNC89_CAEEL	9832	GO:0031672:cellular_component:A band	GO:0031430:cellular_component:M band	GO:0005524:molecular_function:ATP binding	GO:0019902:molecular_function:phosphatase binding	GO:0004672:molecular_function:protein kinase activity	GO:0017048:molecular_function:Rho GTPase binding	GO:0005089:molecular_function:Rho guanyl-nucleotide exchange factor activity	GO:0031034:biological_process:myosin filament assembly	GO:0032321:biological_process:positive regulation of Rho GTPase activity	GO:0030241:biological_process:skeletal muscle myosin thick filament assembly
Locus_27519.0|BlastHit|gi|166215087|sp|Q9VJ79.4|PDE11_DROME	9838	GO:0004115:molecular_function:3',5'-cyclic-AMP phosphodiesterase activity	GO:0047555:molecular_function:3',5'-cyclic-GMP phosphodiesterase activity	GO:0046872:molecular_function:metal ion binding	GO:0046058:biological_process:cAMP metabolic process	GO:0046068:biological_process:cGMP metabolic process	GO:0046331:biological_process:lateral inhibition	GO:0007165:biological_process:signal transduction
Locus_27523.0|BlastHit|gi|462410|sp|P05619.3|ILEU_HORSE	9852	GO:0005737:cellular_component:cytoplasm	GO:0005615:cellular_component:extracellular space	GO:0004867:molecular_function:serine-type endopeptidase inhibitor activity	GO:0010951:biological_process:negative regulation of endopeptidase activity	GO:0030162:biological_process:regulation of proteolysis
Locus_27543.0|BlastHit|gi|60390188|sp|Q6UXK5.1|LRRN1_HUMAN	9872	GO:0016021:cellular_component:integral component of membrane
Locus_27557.0|BlastHit|gi|115311703|sp|Q4G073.1|TRDMT_RAT	9881	GO:0005737:cellular_component:cytoplasm	GO:0005634:cellular_component:nucleus	GO:0003677:molecular_function:DNA binding	GO:0003723:molecular_function:RNA binding	GO:0008175:molecular_function:tRNA methyltransferase activity	GO:0006306:biological_process:DNA methylation
Locus_27557.0|BlastHit|gi|115311703|sp|Q4G073.1|TRDMT_RAT	9881	GO:0005737:cellular_component:cytoplasm	GO:0005634:cellular_component:nucleus	GO:0003677:molecular_function:DNA binding	GO:0003723:molecular_function:RNA binding	GO:0008175:molecular_function:tRNA methyltransferase activity	GO:0006306:biological_process:DNA methylation	GO:0001975:biological_process:response to amphetamine
Locus_27580.5|BlastHit|gi|585173|sp|P38404.1|GNAO_LOCMI	9895	GO:0005525:molecular_function:GTP binding	GO:0003924:molecular_function:GTPase activity	GO:0046872:molecular_function:metal ion binding	GO:0004871:molecular_function:signal transducer activity	GO:0007188:biological_process:adenylate cyclase-modulating G-protein coupled receptor signaling pathway
Locus_27586.0|BlastHit|gi|81902386|sp|Q91X83.1|METK1_MOUSE	9900	GO:0005524:molecular_function:ATP binding	GO:0046872:molecular_function:metal ion binding	GO:0004478:molecular_function:methionine adenosyltransferase activity	GO:0006730:biological_process:one-carbon metabolic process	GO:0006556:biological_process:S-adenosylmethionine biosynthetic process
Locus_27609.0|BlastHit|gi|47115836|sp|Q8IXF9.1|AQ12A_HUMAN	9913	GO:0016021:cellular_component:integral component of membrane	GO:0005215:molecular_function:transporter activity
Locus_27610.0|BlastHit|gi|187470744|sp|A5PJG7.1|CCHL_BOVIN	9914	GO:0005743:cellular_component:mitochondrial inner membrane	GO:0004408:molecular_function:holocytochrome-c synthase activity	GO:0046872:molecular_function:metal ion binding
Locus_27617.0|BlastHit|gi|82217260|sp|Q90YH9.1|TES_CHICK	9916	GO:0005938:cellular_component:cell cortex	GO:0005737:cellular_component:cytoplasm	GO:0005925:cellular_component:focal adhesion	GO:0008270:molecular_function:zinc ion binding	GO:0001755:biological_process:neural crest cell migration	GO:0042127:biological_process:regulation of cell proliferation
Locus_27620.0|BlastHit|gi|341940670|sp|P70428.2|EXT2_MOUSE	9918	GO:0005783:cellular_component:endoplasmic reticulum	GO:0005789:cellular_component:endoplasmic reticulum membrane	GO:0070062:cellular_component:extracellular vesicular exosome	GO:0005794:cellular_component:Golgi apparatus	GO:0000139:cellular_component:Golgi membrane	GO:0016021:cellular_component:integral component of membrane	GO:0031227:cellular_component:intrinsic component of endoplasmic reticulum membrane	GO:0008375:molecular_function:acetylglucosaminyltransferase activity	GO:0050508:molecular_function:glucuronosyl-N-acetylglucosaminyl-proteoglycan 4-alpha-N-acetylglucosaminyltransferase activity	GO:0015020:molecular_function:glucuronosyltransferase activity	GO:0042328:molecular_function:heparan sulfate N-acetylglucosaminyltransferase activity	GO:0046872:molecular_function:metal ion binding	GO:0050509:molecular_function:N-acetylglucosaminyl-proteoglycan 4-beta-glucuronosyltransferase activity	GO:0042803:molecular_function:protein homodimerization activity	GO:0030154:biological_process:cell differentiation	GO:0006024:biological_process:glycosaminoglycan biosynthetic process	GO:0015012:biological_process:heparan sulfate proteoglycan biosynthetic process	GO:0015014:biological_process:heparan sulfate proteoglycan biosynthetic process, polysaccharide chain biosynthetic process	GO:0001707:biological_process:mesoderm formation	GO:0001503:biological_process:ossification	GO:0006486:biological_process:protein glycosylation
Locus_27653.0|BlastHit|gi|30580490|sp|Q9EPA7.2|NMNA1_MOUSE	9940	GO:0005634:cellular_component:nucleus	GO:0005524:molecular_function:ATP binding	GO:0000309:molecular_function:nicotinamide-nucleotide adenylyltransferase activity	GO:0004515:molecular_function:nicotinate-nucleotide adenylyltransferase activity	GO:0009435:biological_process:NAD biosynthetic process
Locus_27654.0|BlastHit|gi|55583896|sp|Q6P268.1|PDCL3_DANRE	9941	GO:0005737:cellular_component:cytoplasm	GO:0043281:biological_process:regulation of cysteine-type endopeptidase activity involved in apoptotic process
Locus_27664.0|BlastHit|gi|124076972|sp|P00031.2|CYC_MACMA	9945	GO:0005829:cellular_component:cytosol	GO:0005758:cellular_component:mitochondrial intermembrane space	GO:0070469:cellular_component:respiratory chain	GO:0045155:molecular_function:electron transporter, transferring electrons from CoQH2-cytochrome c reductase complex and cytochrome c oxidase complex activity	GO:0020037:molecular_function:heme binding	GO:0005506:molecular_function:iron ion binding	GO:0006309:biological_process:apoptotic DNA fragmentation	GO:0055114:biological_process:oxidation-reduction process
Locus_27664.0|BlastHit|gi|124076983|sp|P00040.2|CYC_SCHGR	9946	GO:0005758:cellular_component:mitochondrial intermembrane space	GO:0070469:cellular_component:respiratory chain	GO:0009055:molecular_function:electron carrier activity	GO:0020037:molecular_function:heme binding	GO:0005506:molecular_function:iron ion binding	GO:0055114:biological_process:oxidation-reduction process
Locus_27682.0|BlastHit|gi|251765158|sp|B4JJQ3.1|NNRE_DROGR	9969	GO:0046872:molecular_function:metal ion binding	GO:0052856:molecular_function:NADHX epimerase activity	GO:0000166:molecular_function:nucleotide binding
Locus_27686.0|BlastHit|gi|182702124|sp|O42412.3|IOD3_CHICK	9971	GO:0005789:cellular_component:endoplasmic reticulum membrane	GO:0016021:cellular_component:integral component of membrane	GO:0004800:molecular_function:thyroxine 5'-deiodinase activity	GO:0042446:biological_process:hormone biosynthetic process
Locus_27686.0|BlastHit|gi|182702124|sp|O42412.3|IOD3_CHICK	9971	GO:0010008:cellular_component:endosome membrane	GO:0016021:cellular_component:integral component of membrane	GO:0005886:cellular_component:plasma membrane	GO:0004800:molecular_function:thyroxine 5'-deiodinase activity	GO:0033798:molecular_function:thyroxine 5-deiodinase activity	GO:0042446:biological_process:hormone biosynthetic process
Locus_27687.0|BlastHit|gi|67461007|sp|Q5RCC7.1|MSPD1_PONAB	9973	GO:0016021:cellular_component:integral component of membrane	GO:0005198:molecular_function:structural molecule activity
Locus_27697.0|BlastHit|gi|38372481|sp|Q8BGA9.1|OXA1L_MOUSE	9980	GO:0016021:cellular_component:integral component of membrane	GO:0005743:cellular_component:mitochondrial inner membrane	GO:0031966:cellular_component:mitochondrial membrane	GO:0005739:cellular_component:mitochondrion	GO:0097177:molecular_function:mitochondrial ribosome binding	GO:0042803:molecular_function:protein homodimerization activity	GO:0097031:biological_process:mitochondrial respiratory chain complex I biogenesis	GO:0051205:biological_process:protein insertion into membrane	GO:0051262:biological_process:protein tetramerization
Locus_27698.0|BlastHit|gi|3913718|sp|O43826.1|G6PT1_HUMAN	9981	GO:0005783:cellular_component:endoplasmic reticulum	GO:0005789:cellular_component:endoplasmic reticulum membrane	GO:0030176:cellular_component:integral component of endoplasmic reticulum membrane	GO:0016021:cellular_component:integral component of membrane	GO:0016020:cellular_component:membrane	GO:0015152:molecular_function:glucose-6-phosphate transmembrane transporter activity	GO:0005215:molecular_function:transporter activity	GO:0005975:biological_process:carbohydrate metabolic process	GO:0042593:biological_process:glucose homeostasis	GO:0006006:biological_process:glucose metabolic process	GO:0015758:biological_process:glucose transport	GO:0015760:biological_process:glucose-6-phosphate transport	GO:0008645:biological_process:hexose transport	GO:0044281:biological_process:small molecule metabolic process	GO:0055085:biological_process:transmembrane transport	GO:0006810:biological_process:transport
Locus_27703.0|BlastHit|gi|34222668|sp|Q8BMG8.1|MFTC_MOUSE	9987	GO:0016021:cellular_component:integral component of membrane	GO:0005743:cellular_component:mitochondrial inner membrane	GO:0005739:cellular_component:mitochondrion	GO:0006810:biological_process:transport
Locus_27703.0|BlastHit|gi|34222668|sp|Q8BMG8.1|MFTC_MOUSE	9988	GO:0016021:cellular_component:integral component of membrane	GO:0005743:cellular_component:mitochondrial inner membrane	GO:0005739:cellular_component:mitochondrion	GO:0006810:biological_process:transport
Locus_27720.0|BlastHit|gi|68067543|sp|P07192.2|MAL3_DROME	10000	GO:0004558:molecular_function:alpha-1,4-glucosidase activity	GO:0043169:molecular_function:cation binding	GO:0032450:molecular_function:maltose alpha-glucosidase activity	GO:0005975:biological_process:carbohydrate metabolic process
Locus_27731.0|BlastHit|gi|82182166|sp|Q6DC58.1|TM223_DANRE	10012	GO:0016021:cellular_component:integral component of membrane
Locus_27746.0|BlastHit|gi|78103352|sp|Q9CQ56.1|USE1_MOUSE	10024	GO:0005789:cellular_component:endoplasmic reticulum membrane	GO:0016021:cellular_component:integral component of membrane	GO:0007029:biological_process:endoplasmic reticulum organization	GO:0071786:biological_process:endoplasmic reticulum tubular network organization	GO:0015031:biological_process:protein transport	GO:0060628:biological_process:regulation of ER to Golgi vesicle-mediated transport	GO:0016192:biological_process:vesicle-mediated transport
Locus_27751.0|BlastHit|gi|121717|sp|P04905.2|GSTM1_RAT	10028	GO:0005737:cellular_component:cytoplasm	GO:0005576:cellular_component:extracellular region	GO:0043234:cellular_component:protein complex	GO:0004364:molecular_function:glutathione transferase activity	GO:0016151:molecular_function:nickel cation binding	GO:0042803:molecular_function:protein homodimerization activity	GO:0005496:molecular_function:steroid binding	GO:0006749:biological_process:glutathione metabolic process	GO:0043200:biological_process:response to amino acid	GO:0046677:biological_process:response to antibiotic	GO:0048678:biological_process:response to axon injury	GO:0042493:biological_process:response to drug	GO:0045471:biological_process:response to ethanol	GO:0010288:biological_process:response to lead ion	GO:0010226:biological_process:response to lithium ion	GO:0010038:biological_process:response to metal ion	GO:0007608:biological_process:sensory perception of smell
Locus_27753.0|BlastHit|gi|56404954|sp|Q9CQS5.1|RIOK2_MOUSE	10030	GO:0005524:molecular_function:ATP binding	GO:0004674:molecular_function:protein serine/threonine kinase activity
Locus_27762.0|BlastHit|gi|14916936|sp|Q9HYH5.1|Y3430_PSEAE	10037	GO:0046872:molecular_function:metal ion binding
Locus_27764.0|BlastHit|gi|21541962|sp|Q9QZU7.1|BODG_RAT	10038	GO:0005737:cellular_component:cytoplasm	GO:0008336:molecular_function:gamma-butyrobetaine dioxygenase activity	GO:0005506:molecular_function:iron ion binding	GO:0008270:molecular_function:zinc ion binding	GO:0045329:biological_process:carnitine biosynthetic process
Locus_27767.0|BlastHit|gi|1346566|sp|P47811.3|MK14_MOUSE	10059	GO:0005737:cellular_component:cytoplasm	GO:0005829:cellular_component:cytosol	GO:0005634:cellular_component:nucleus	GO:0005524:molecular_function:ATP binding	GO:0004707:molecular_function:MAP kinase activity	GO:0008022:molecular_function:protein C-terminus binding	GO:0006915:biological_process:apoptotic process	GO:0035556:biological_process:intracellular signal transduction	GO:0038066:biological_process:p38MAPK cascade	GO:0045663:biological_process:positive regulation of myoblast differentiation	GO:1901741:biological_process:positive regulation of myoblast fusion	GO:0010831:biological_process:positive regulation of myotube differentiation	GO:0046777:biological_process:protein autophosphorylation	GO:0006468:biological_process:protein phosphorylation	GO:0006357:biological_process:regulation of transcription from RNA polymerase II promoter	GO:0009749:biological_process:response to glucose	GO:0051403:biological_process:stress-activated MAPK cascade	GO:0006351:biological_process:transcription, DNA-templated
Locus_27771.0|BlastHit|gi|74947746|sp|Q9VCC0.1|CHRD1_DROME	10061	GO:0008270:molecular_function:zinc ion binding	GO:0061077:biological_process:chaperone-mediated protein folding	GO:2000299:biological_process:negative regulation of Rho-dependent protein serine/threonine kinase activity	GO:1900034:biological_process:regulation of cellular response to heat	GO:0010824:biological_process:regulation of centrosome duplication
Locus_27772.0|BlastHit|gi|123928|sp|P07687.1|HYEP_RAT	10062	GO:0005789:cellular_component:endoplasmic reticulum membrane	GO:0016021:cellular_component:integral component of membrane	GO:0033961:molecular_function:cis-stilbene-oxide hydrolase activity	GO:0004301:molecular_function:epoxide hydrolase activity	GO:0019439:biological_process:aromatic compound catabolic process	GO:0009636:biological_process:response to toxic substance
Locus_27783.0|BlastHit|gi|20139021|sp|Q91642.1|PEPE_XENLA	10077	GO:0005737:cellular_component:cytoplasm	GO:0016805:molecular_function:dipeptidase activity	GO:0008236:molecular_function:serine-type peptidase activity
Locus_27795.0|BlastHit|gi|74866454|sp|Q95SS8.1|TMM70_DROME	10086	GO:0032592:cellular_component:integral component of mitochondrial membrane	GO:0033615:biological_process:mitochondrial proton-transporting ATP synthase complex assembly
Locus_27819.0|BlastHit|gi|81906067|sp|Q9DB60.1|PGFS_MOUSE	10114	GO:0005737:cellular_component:cytoplasm	GO:0005829:cellular_component:cytosol	GO:0005783:cellular_component:endoplasmic reticulum	GO:0070062:cellular_component:extracellular vesicular exosome	GO:0043209:cellular_component:myelin sheath	GO:0016616:molecular_function:oxidoreductase activity, acting on the CH-OH group of donors, NAD or NADP as acceptor	GO:0047017:molecular_function:prostaglandin-F synthase activity	GO:0019369:biological_process:arachidonic acid metabolic process	GO:0019371:biological_process:cyclooxygenase pathway	GO:0001516:biological_process:prostaglandin biosynthetic process	GO:0044281:biological_process:small molecule metabolic process
Locus_27823.0|BlastHit|gi|122143481|sp|Q0VCA9.1|TMED6_BOVIN	10123	GO:0005789:cellular_component:endoplasmic reticulum membrane	GO:0016021:cellular_component:integral component of membrane	GO:0006810:biological_process:transport
Locus_27838.0|BlastHit|gi|3182992|sp|P79345.1|NPC2_BOVIN	10147	GO:0005783:cellular_component:endoplasmic reticulum	GO:0070062:cellular_component:extracellular vesicular exosome	GO:0005764:cellular_component:lysosome	GO:0015485:molecular_function:cholesterol binding	GO:0033344:biological_process:cholesterol efflux	GO:0042632:biological_process:cholesterol homeostasis	GO:0008203:biological_process:cholesterol metabolic process	GO:0030301:biological_process:cholesterol transport	GO:0032367:biological_process:intracellular cholesterol transport	GO:0009615:biological_process:response to virus
Locus_27866.1|BlastHit|gi|28380062|sp|Q9VXK6.1|IF5_DROME	10169	GO:0005829:cellular_component:cytosol	GO:0005525:molecular_function:GTP binding	GO:0003743:molecular_function:translation initiation factor activity	GO:0022008:biological_process:neurogenesis	GO:0006413:biological_process:translational initiation
Locus_27870.0|BlastHit|gi|74942758|sp|Q9I7S8.2|PUR6_DROME	10173	GO:0005524:molecular_function:ATP binding	GO:0004638:molecular_function:phosphoribosylaminoimidazole carboxylase activity	GO:0004639:molecular_function:phosphoribosylaminoimidazolesuccinocarboxamide synthase activity	GO:0006189:biological_process:'de novo' IMP biosynthetic process	GO:0007476:biological_process:imaginal disc-derived wing morphogenesis	GO:0002121:biological_process:inter-male aggressive behavior
Locus_27885.0|BlastHit|gi|93141310|sp|Q12981.3|SEC20_HUMAN	10183	GO:0005737:cellular_component:cytoplasm	GO:0005783:cellular_component:endoplasmic reticulum	GO:0030176:cellular_component:integral component of endoplasmic reticulum membrane	GO:0043231:cellular_component:intracellular membrane-bounded organelle	GO:0005739:cellular_component:mitochondrion	GO:0005635:cellular_component:nuclear envelope	GO:0031201:cellular_component:SNARE complex	GO:0005484:molecular_function:SNAP receptor activity	GO:0006915:biological_process:apoptotic process	GO:0006914:biological_process:autophagy	GO:0016320:biological_process:endoplasmic reticulum membrane fusion	GO:0007029:biological_process:endoplasmic reticulum organization	GO:0097194:biological_process:execution phase of apoptosis	GO:0043066:biological_process:negative regulation of apoptotic process	GO:0016192:biological_process:vesicle-mediated transport
Locus_27888.0|BlastHit|gi|342187160|sp|Q6P5E4.4|UGGG1_MOUSE	10190	GO:0005788:cellular_component:endoplasmic reticulum lumen	GO:0005793:cellular_component:endoplasmic reticulum-Golgi intermediate compartment	GO:0070062:cellular_component:extracellular vesicular exosome	GO:0003980:molecular_function:UDP-glucose:glycoprotein glucosyltransferase activity	GO:0051082:molecular_function:unfolded protein binding	GO:0006486:biological_process:protein glycosylation	GO:0097359:biological_process:UDP-glucosylation
Locus_27903.0|BlastHit|gi|2495109|sp|Q64471.3|GSTT1_MOUSE	10204	GO:0005634:cellular_component:nucleus	GO:0005669:cellular_component:transcription factor TFIID complex	GO:0002039:molecular_function:p53 binding	GO:0008270:molecular_function:zinc ion binding	GO:0051457:biological_process:maintenance of protein location in nucleus	GO:0043433:biological_process:negative regulation of sequence-specific DNA binding transcription factor activity	GO:0000122:biological_process:negative regulation of transcription from RNA polymerase II promoter	GO:0006357:biological_process:regulation of transcription from RNA polymerase II promoter	GO:0006366:biological_process:transcription from RNA polymerase II promoter
Locus_27903.0|BlastHit|gi|2495109|sp|Q64471.3|GSTT1_MOUSE	10204	GO:0005829:cellular_component:cytosol	GO:0047651:molecular_function:alkylhalidase activity	GO:0004602:molecular_function:glutathione peroxidase activity	GO:0004364:molecular_function:glutathione transferase activity	GO:0018900:biological_process:dichloromethane metabolic process	GO:0006304:biological_process:DNA modification	GO:0006749:biological_process:glutathione metabolic process	GO:0055114:biological_process:oxidation-reduction process	GO:0042493:biological_process:response to drug	GO:0014070:biological_process:response to organic cyclic compound	GO:0009751:biological_process:response to salicylic acid	GO:0010269:biological_process:response to selenium ion	GO:0033197:biological_process:response to vitamin E
Locus_27909.0|BlastHit|gi|122140235|sp|Q3SZJ4.1|PTGR1_BOVIN	10209	GO:0005737:cellular_component:cytoplasm	GO:0036132:molecular_function:13-prostaglandin reductase activity	GO:0047522:molecular_function:15-oxoprostaglandin 13-oxidase activity	GO:0032440:molecular_function:2-alkenal reductase [NAD(P)] activity	GO:0008270:molecular_function:zinc ion binding
Locus_27912.0|BlastHit|gi|464320|sp|P34714.1|SPRC_CAEEL	10213	GO:0005604:cellular_component:basement membrane	GO:0005615:cellular_component:extracellular space	GO:0005509:molecular_function:calcium ion binding	GO:0007275:biological_process:multicellular organismal development	GO:0007165:biological_process:signal transduction
Locus_27929.0|BlastHit|gi|110278902|sp|Q99MB4.2|CBWD1_RAT	10230	GO:0005524:molecular_function:ATP binding
Locus_27932.0|BlastHit|gi|84029495|sp|Q6ZPY2.2|SMG5_MOUSE	10235	GO:0005737:cellular_component:cytoplasm	GO:0005634:cellular_component:nucleus	GO:0051721:molecular_function:protein phosphatase 2A binding	GO:0000184:biological_process:nuclear-transcribed mRNA catabolic process, nonsense-mediated decay	GO:0035303:biological_process:regulation of dephosphorylation
Locus_27937.0|BlastHit|gi|166899092|sp|P55859.3|PNPH_BOVIN	10236	GO:0005737:cellular_component:cytoplasm	GO:0005856:cellular_component:cytoskeleton	GO:0004731:molecular_function:purine-nucleoside phosphorylase activity	GO:0009116:biological_process:nucleoside metabolic process
Locus_27952.0|BlastHit|gi|82188244|sp|Q7T3C6.1|CPSF5_DANRE	10248	GO:0005849:cellular_component:mRNA cleavage factor complex	GO:0042382:cellular_component:paraspeckles	GO:0017091:molecular_function:AU-rich element binding	GO:0016787:molecular_function:hydrolase activity	GO:0003729:molecular_function:mRNA binding	GO:0006378:biological_process:mRNA polyadenylation	GO:0006397:biological_process:mRNA processing
Locus_27965.0|BlastHit|gi|122140411|sp|Q3T0V9.1|DEOC_BOVIN	10259	GO:0005737:cellular_component:cytoplasm	GO:0070062:cellular_component:extracellular vesicular exosome	GO:0004139:molecular_function:deoxyribose-phosphate aldolase activity	GO:0046121:biological_process:deoxyribonucleoside catabolic process	GO:0009264:biological_process:deoxyribonucleotide catabolic process	GO:0046386:biological_process:deoxyribose phosphate catabolic process
Locus_27968.0|BlastHit|gi|21362539|sp|Q9V9Z9.1|EBP2_DROME	10261	GO:0005730:cellular_component:nucleolus	GO:0042254:biological_process:ribosome biogenesis
Locus_27989.0|BlastHit|gi|34223744|sp|Q9VCR7.2|CTNS_DROME	10290	GO:0000932:cellular_component:cytoplasmic mRNA processing body	GO:0005665:cellular_component:DNA-directed RNA polymerase II, core complex	GO:0005634:cellular_component:nucleus	GO:0003899:molecular_function:DNA-directed RNA polymerase activity	GO:0000166:molecular_function:nucleotide binding	GO:0031369:molecular_function:translation initiation factor binding	GO:0031990:biological_process:mRNA export from nucleus in response to heat stress	GO:0000288:biological_process:nuclear-transcribed mRNA catabolic process, deadenylation-dependent decay	GO:0045948:biological_process:positive regulation of translational initiation	GO:0034402:biological_process:recruitment of 3'-end processing factors to RNA polymerase II holoenzyme complex	GO:0006366:biological_process:transcription from RNA polymerase II promoter	GO:0006367:biological_process:transcription initiation from RNA polymerase II promoter
Locus_27989.0|BlastHit|gi|34223744|sp|Q9VCR7.2|CTNS_DROME	10290	GO:0016021:cellular_component:integral component of membrane	GO:0005765:cellular_component:lysosomal membrane	GO:0015171:molecular_function:amino acid transmembrane transporter activity	GO:0003333:biological_process:amino acid transmembrane transport
Locus_28021.0|BlastHit|gi|51316507|sp|Q924Z4.1|CERS2_MOUSE	10311	GO:0005789:cellular_component:endoplasmic reticulum membrane	GO:0016021:cellular_component:integral component of membrane	GO:0031965:cellular_component:nuclear membrane	GO:0003677:molecular_function:DNA binding	GO:0050291:molecular_function:sphingosine N-acyltransferase activity	GO:0046513:biological_process:ceramide biosynthetic process	GO:0030148:biological_process:sphingolipid biosynthetic process
Locus_28027.0|BlastHit|gi|29839592|sp|Q90673.1|PRLD1_CHICK	10316	GO:0005758:cellular_component:mitochondrial intermembrane space	GO:0005739:cellular_component:mitochondrion	GO:0006915:biological_process:apoptotic process	GO:0006869:biological_process:lipid transport
Locus_28032.0|BlastHit|gi|62901525|sp|Q94900.2|GLUCL_DROME	10319	GO:0030054:cellular_component:cell junction	GO:0034707:cellular_component:chloride channel complex	GO:0016021:cellular_component:integral component of membrane	GO:0005886:cellular_component:plasma membrane	GO:0045211:cellular_component:postsynaptic membrane	GO:0008068:molecular_function:extracellular-glutamate-gated chloride channel activity	GO:1902476:biological_process:chloride transmembrane transport	GO:0006821:biological_process:chloride transport	GO:0048812:biological_process:neuron projection morphogenesis
Locus_28040.0|BlastHit|gi|57015283|sp|O55102.2|BL1S1_MOUSE	10326	GO:0031083:cellular_component:BLOC-1 complex	GO:0008057:biological_process:eye pigment granule organization	GO:0007274:biological_process:neuromuscular synaptic transmission
Locus_28042.0|BlastHit|gi|85701141|sp|Q3THS6.2|METK2_MOUSE	10355	GO:0048269:cellular_component:methionine adenosyltransferase complex	GO:0005524:molecular_function:ATP binding	GO:0046872:molecular_function:metal ion binding	GO:0004478:molecular_function:methionine adenosyltransferase activity	GO:0006730:biological_process:one-carbon metabolic process	GO:0006556:biological_process:S-adenosylmethionine biosynthetic process
Locus_28064.0|BlastHit|gi|57014080|sp|Q80UN9.2|MOD5_MOUSE	10376	GO:0005739:cellular_component:mitochondrion	GO:0005634:cellular_component:nucleus	GO:0005524:molecular_function:ATP binding	GO:0046872:molecular_function:metal ion binding	GO:0052381:molecular_function:tRNA dimethylallyltransferase activity	GO:0008033:biological_process:tRNA processing
Locus_28067.1|BlastHit|gi|82192994|sp|Q52L45.1|ILEU_XENLA	10380	GO:0005737:cellular_component:cytoplasm	GO:0005615:cellular_component:extracellular space	GO:0004867:molecular_function:serine-type endopeptidase inhibitor activity
Locus_28094.0|BlastHit|gi|13124102|sp|Q9VA73.1|CMC_DROME	10415	GO:0016021:cellular_component:integral component of membrane	GO:0005811:cellular_component:lipid particle	GO:0005743:cellular_component:mitochondrial inner membrane	GO:0005739:cellular_component:mitochondrion	GO:0005509:molecular_function:calcium ion binding	GO:0055085:biological_process:transmembrane transport	GO:0042060:biological_process:wound healing
Locus_28125.0|BlastHit|gi|121328|sp|P13255.2|GNMT_RAT	10446	GO:0005829:cellular_component:cytosol	GO:0005634:cellular_component:nucleus	GO:0005542:molecular_function:folic acid binding	GO:0016594:molecular_function:glycine binding	GO:0017174:molecular_function:glycine N-methyltransferase activity	GO:0008757:molecular_function:S-adenosylmethionine-dependent methyltransferase activity	GO:0046655:biological_process:folic acid metabolic process	GO:0006544:biological_process:glycine metabolic process	GO:0051289:biological_process:protein homotetramerization	GO:0051262:biological_process:protein tetramerization	GO:0046498:biological_process:S-adenosylhomocysteine metabolic process	GO:0046500:biological_process:S-adenosylmethionine metabolic process	GO:1901052:biological_process:sarcosine metabolic process
Locus_28133.1|BlastHit|gi|190359360|sp|Q4AEH7.2|GPX2_CEBAP	10455	GO:0005737:cellular_component:cytoplasm	GO:0004602:molecular_function:glutathione peroxidase activity	GO:0006979:biological_process:response to oxidative stress
Locus_28133.1|BlastHit|gi|190359360|sp|Q4AEH7.2|GPX2_CEBAP	10456	GO:0005737:cellular_component:cytoplasm	GO:0004602:molecular_function:glutathione peroxidase activity	GO:0006979:biological_process:response to oxidative stress
Locus_28142.0|BlastHit|gi|81906588|sp|Q9JHG1.1|PIGP_MOUSE	10463	GO:0005783:cellular_component:endoplasmic reticulum	GO:0000506:cellular_component:glycosylphosphatidylinositol-N-acetylglucosaminyltransferase (GPI-GnT) complex	GO:0016021:cellular_component:integral component of membrane	GO:0017176:molecular_function:phosphatidylinositol N-acetylglucosaminyltransferase activity	GO:0006506:biological_process:GPI anchor biosynthetic process
Locus_28142.0|BlastHit|gi|81906588|sp|Q9JHG1.1|PIGP_MOUSE	10463	GO:0005634:cellular_component:nucleus	GO:0008033:biological_process:tRNA processing
Locus_28148.0|BlastHit|gi|160332368|sp|Q7YU81.3|CHN_DROME	10468	GO:0005634:cellular_component:nucleus	GO:0046872:molecular_function:metal ion binding	GO:0001078:molecular_function:RNA polymerase II core promoter proximal region sequence-specific DNA binding transcription factor activity involved in negative regulation of transcription	GO:0003705:molecular_function:RNA polymerase II distal enhancer sequence-specific DNA binding transcription factor activity	GO:0043565:molecular_function:sequence-specific DNA binding	GO:0048813:biological_process:dendrite morphogenesis	GO:0001700:biological_process:embryonic development via the syncytial blastoderm	GO:0001654:biological_process:eye development	GO:0042683:biological_process:negative regulation of compound eye cone cell fate specification	GO:0000122:biological_process:negative regulation of transcription from RNA polymerase II promoter	GO:0007422:biological_process:peripheral nervous system development	GO:0045944:biological_process:positive regulation of transcription from RNA polymerase II promoter	GO:0007458:biological_process:progression of morphogenetic furrow involved in compound eye morphogenesis	GO:0009612:biological_process:response to mechanical stimulus	GO:0007423:biological_process:sensory organ development	GO:0006366:biological_process:transcription from RNA polymerase II promoter
Locus_28154.0|BlastHit|gi|20139238|sp|Q9NY93.1|DDX56_HUMAN	10488	GO:0016020:cellular_component:membrane	GO:0005730:cellular_component:nucleolus	GO:0005524:molecular_function:ATP binding	GO:0004004:molecular_function:ATP-dependent RNA helicase activity	GO:0044822:molecular_function:poly(A) RNA binding	GO:0006200:biological_process:ATP catabolic process	GO:0006364:biological_process:rRNA processing
Locus_28159.0|BlastHit|gi|166219770|sp|P0C606.1|SGF29_RAT	10491	GO:0005671:cellular_component:Ada2/Gcn5/Ada3 transcription activator complex	GO:0070461:cellular_component:SAGA-type complex	GO:0035064:molecular_function:methylated histone binding	GO:0043966:biological_process:histone H3 acetylation	GO:0006355:biological_process:regulation of transcription, DNA-templated	GO:0006351:biological_process:transcription, DNA-templated
Locus_28164.0|BlastHit|gi|33302633|sp|Q9VLS1.2|KPBB_DROME	10495	GO:0005886:cellular_component:plasma membrane	GO:0004553:molecular_function:hydrolase activity, hydrolyzing O-glycosyl compounds	GO:0005977:biological_process:glycogen metabolic process
Locus_28170.0|BlastHit|gi|729072|sp|P80363.1|CCB23_ORCLI	10502	GO:0005509:molecular_function:calcium ion binding
Locus_28183.0|BlastHit|gi|75042696|sp|Q5RFT1.1|CB018_PONAB	10514	GO:0016021:cellular_component:integral component of membrane	GO:0005765:cellular_component:lysosomal membrane	GO:0005739:cellular_component:mitochondrion	GO:1901029:biological_process:negative regulation of mitochondrial outer membrane permeabilization involved in apoptotic signaling pathway	GO:0008284:biological_process:positive regulation of cell proliferation	GO:0006810:biological_process:transport
Locus_28185.0|BlastHit|gi|121949074|sp|Q496Y0.1|LONF3_HUMAN	10517	GO:0004176:molecular_function:ATP-dependent peptidase activity	GO:0008270:molecular_function:zinc ion binding
Locus_28199.0|BlastHit|gi|134053|sp|P10735.1|RT12_DROME	10532	GO:0005763:cellular_component:mitochondrial small ribosomal subunit	GO:0003735:molecular_function:structural constituent of ribosome	GO:0007619:biological_process:courtship behavior	GO:0008049:biological_process:male courtship behavior	GO:0007638:biological_process:mechanosensory behavior	GO:0001666:biological_process:response to hypoxia	GO:0009612:biological_process:response to mechanical stimulus	GO:0007605:biological_process:sensory perception of sound	GO:0006412:biological_process:translation
Locus_28216.0|BlastHit|gi|145559525|sp|P82925.3|RT31_BOVIN	10552	GO:0005763:cellular_component:mitochondrial small ribosomal subunit	GO:0005730:cellular_component:nucleolus	GO:0044822:molecular_function:poly(A) RNA binding	GO:0003735:molecular_function:structural constituent of ribosome
Locus_28221.0|BlastHit|gi|118572819|sp|Q2KJI7.1|AFG32_BOVIN	10554	GO:0016021:cellular_component:integral component of membrane	GO:0005743:cellular_component:mitochondrial inner membrane	GO:0005739:cellular_component:mitochondrion	GO:0005524:molecular_function:ATP binding	GO:0004222:molecular_function:metalloendopeptidase activity	GO:0051082:molecular_function:unfolded protein binding	GO:0008270:molecular_function:zinc ion binding	GO:0007409:biological_process:axonogenesis	GO:0042407:biological_process:cristae formation	GO:0016265:biological_process:death	GO:0008053:biological_process:mitochondrial fusion	GO:0034982:biological_process:mitochondrial protein processing	GO:0048747:biological_process:muscle fiber development	GO:0042552:biological_process:myelination	GO:0021675:biological_process:nerve development	GO:0007528:biological_process:neuromuscular junction development	GO:0040014:biological_process:regulation of multicellular organism growth	GO:0060013:biological_process:righting reflex
Locus_28229.0|BlastHit|gi|21542476|sp|P34298.2|DUOXA_CAEEL	10563	GO:0005789:cellular_component:endoplasmic reticulum membrane	GO:0016021:cellular_component:integral component of membrane	GO:0015031:biological_process:protein transport
Locus_28231.0|BlastHit|gi|108860959|sp|Q2KID9.1|RT05_BOVIN	10564	GO:0005739:cellular_component:mitochondrion	GO:0005840:cellular_component:ribosome	GO:0044822:molecular_function:poly(A) RNA binding	GO:0003735:molecular_function:structural constituent of ribosome	GO:0006412:biological_process:translation
Locus_28246.0|BlastHit|gi|122145942|sp|Q2F7Z7.1|TMM59_PIG	10580	GO:0070062:cellular_component:extracellular vesicular exosome	GO:0000137:cellular_component:Golgi cis cisterna	GO:0005797:cellular_component:Golgi medial cisterna	GO:0000139:cellular_component:Golgi membrane	GO:0000138:cellular_component:Golgi trans cisterna	GO:0016021:cellular_component:integral component of membrane	GO:0005770:cellular_component:late endosome	GO:0031902:cellular_component:late endosome membrane	GO:0005765:cellular_component:lysosomal membrane	GO:0005764:cellular_component:lysosome	GO:0005886:cellular_component:plasma membrane	GO:0004175:molecular_function:endopeptidase activity	GO:0006914:biological_process:autophagy	GO:0090005:biological_process:negative regulation of establishment of protein localization to plasma membrane	GO:0090285:biological_process:negative regulation of protein glycosylation in Golgi	GO:0010955:biological_process:negative regulation of protein processing	GO:0010508:biological_process:positive regulation of autophagy
Locus_28248.0|BlastHit|gi|115502344|sp|Q0MQG7.1|NDUS3_GORGO	10582	GO:0031966:cellular_component:mitochondrial membrane	GO:0005747:cellular_component:mitochondrial respiratory chain complex I	GO:0008137:molecular_function:NADH dehydrogenase (ubiquinone) activity	GO:0003954:molecular_function:NADH dehydrogenase activity	GO:0030308:biological_process:negative regulation of cell growth	GO:2001243:biological_process:negative regulation of intrinsic apoptotic signaling pathway	GO:0072593:biological_process:reactive oxygen species metabolic process
Locus_28265.0|BlastHit|gi|1172740|sp|P42556.1|PTR1_LEITA	10595	GO:0047040:molecular_function:pteridine reductase activity	GO:0031427:biological_process:response to methotrexate	GO:0006729:biological_process:tetrahydrobiopterin biosynthetic process
Locus_28269.0|BlastHit|gi|110825795|sp|P07031.2|ACYP2_CHICK	10602	GO:0005739:cellular_component:mitochondrion	GO:0003998:molecular_function:acylphosphatase activity
Locus_28272.0|BlastHit|gi|74897764|sp|Q56R10.1|ASTA_PENMO	10604	GO:0005576:cellular_component:extracellular region
Locus_28281.0|BlastHit|gi|6685412|sp|O76767.1|ERD2_DROME	10606	GO:0005789:cellular_component:endoplasmic reticulum membrane	GO:0016021:cellular_component:integral component of membrane	GO:0046923:molecular_function:ER retention sequence binding	GO:0006621:biological_process:protein retention in ER lumen	GO:0015031:biological_process:protein transport	GO:0016192:biological_process:vesicle-mediated transport
Locus_28287.0|BlastHit|gi|313118235|sp|B2D0J5.1|EST6_APIME	10612	GO:0005576:cellular_component:extracellular region	GO:0052689:molecular_function:carboxylic ester hydrolase activity
Locus_28288.0|BlastHit|gi|76803554|sp|Q13206.2|DDX10_HUMAN	10613	GO:0005524:molecular_function:ATP binding	GO:0008026:molecular_function:ATP-dependent helicase activity	GO:0044822:molecular_function:poly(A) RNA binding	GO:0003724:molecular_function:RNA helicase activity	GO:0008152:biological_process:metabolic process
Locus_28288.0|BlastHit|gi|76803554|sp|Q13206.2|DDX10_HUMAN	10613	GO:0030054:cellular_component:cell junction	GO:0005737:cellular_component:cytoplasm	GO:0043231:cellular_component:intracellular membrane-bounded organelle	GO:0016020:cellular_component:membrane	GO:0005730:cellular_component:nucleolus	GO:0005086:molecular_function:ARF guanyl-nucleotide exchange factor activity	GO:0030036:biological_process:actin cytoskeleton organization	GO:0043547:biological_process:positive regulation of GTPase activity	GO:0032012:biological_process:regulation of ARF protein signal transduction
Locus_28296.0|BlastHit|gi|5915892|sp|P81589.1|CUC11_CANPG	10623	GO:0042302:molecular_function:structural constituent of cuticle
Locus_28296.0|BlastHit|gi|5915892|sp|P81589.1|CUC11_CANPG	10624	GO:0042302:molecular_function:structural constituent of cuticle
Locus_28306.0|BlastHit|gi|127717|sp|P29218.1|IMPA1_HUMAN	10634	GO:0005737:cellular_component:cytoplasm	GO:0005829:cellular_component:cytosol	GO:0070062:cellular_component:extracellular vesicular exosome	GO:0042802:molecular_function:identical protein binding	GO:0008934:molecular_function:inositol monophosphate 1-phosphatase activity	GO:0052832:molecular_function:inositol monophosphate 3-phosphatase activity	GO:0052833:molecular_function:inositol monophosphate 4-phosphatase activity	GO:0052834:molecular_function:inositol monophosphate phosphatase activity	GO:0031403:molecular_function:lithium ion binding	GO:0000287:molecular_function:magnesium ion binding	GO:0030145:molecular_function:manganese ion binding	GO:0042803:molecular_function:protein homodimerization activity	GO:0006021:biological_process:inositol biosynthetic process	GO:0046855:biological_process:inositol phosphate dephosphorylation	GO:0043647:biological_process:inositol phosphate metabolic process	GO:0006796:biological_process:phosphate-containing compound metabolic process	GO:0006661:biological_process:phosphatidylinositol biosynthetic process	GO:0046854:biological_process:phosphatidylinositol phosphorylation	GO:0007165:biological_process:signal transduction	GO:0044281:biological_process:small molecule metabolic process
Locus_28307.0|BlastHit|gi|47116230|sp|Q91Z53.1|GRHPR_MOUSE	10635	GO:0005829:cellular_component:cytosol	GO:0070062:cellular_component:extracellular vesicular exosome	GO:0031406:molecular_function:carboxylic acid binding	GO:0008465:molecular_function:glycerate dehydrogenase activity	GO:0030267:molecular_function:glyoxylate reductase (NADP) activity	GO:0016618:molecular_function:hydroxypyruvate reductase activity	GO:0051287:molecular_function:NAD binding	GO:0070402:molecular_function:NADPH binding	GO:0043648:biological_process:dicarboxylic acid metabolic process	GO:0007588:biological_process:excretion	GO:0051259:biological_process:protein oligomerization
Locus_28308.0|BlastHit|gi|6685712|sp|O60733.2|PA2G6_HUMAN	10636	GO:0005829:cellular_component:cytosol	GO:0016020:cellular_component:membrane	GO:0005739:cellular_component:mitochondrion	GO:0047499:molecular_function:calcium-independent phospholipase A2 activity	GO:0032049:biological_process:cardiolipin biosynthetic process	GO:0006935:biological_process:chemotaxis	GO:0016042:biological_process:lipid catabolic process	GO:0060135:biological_process:maternal process involved in female pregnancy	GO:0007613:biological_process:memory	GO:0051967:biological_process:negative regulation of synaptic transmission, glutamatergic	GO:0090238:biological_process:positive regulation of arachidonic acid secretion	GO:2000304:biological_process:positive regulation of ceramide biosynthetic process	GO:0007204:biological_process:positive regulation of cytosolic calcium ion concentration	GO:0045921:biological_process:positive regulation of exocytosis	GO:0035774:biological_process:positive regulation of insulin secretion involved in cellular response to glucose stimulus	GO:0090037:biological_process:positive regulation of protein kinase C signaling	GO:0001934:biological_process:positive regulation of protein phosphorylation	GO:0090200:biological_process:positive regulation of release of cytochrome c from mitochondria	GO:0045909:biological_process:positive regulation of vasodilation	GO:1901339:biological_process:regulation of store-operated calcium channel activity	GO:0034976:biological_process:response to endoplasmic reticulum stress	GO:0014832:biological_process:urinary bladder smooth muscle contraction
Locus_28311.0|BlastHit|gi|259016214|sp|Q6PEE2.2|CTIF_MOUSE	10641	GO:0048471:cellular_component:perinuclear region of cytoplasm	GO:0003723:molecular_function:RNA binding	GO:0000184:biological_process:nuclear-transcribed mRNA catabolic process, nonsense-mediated decay	GO:0006446:biological_process:regulation of translational initiation
Locus_28314.0|BlastHit|gi|81911277|sp|Q6P5P3.1|TTC9C_RAT	10642	GO:0005789:cellular_component:endoplasmic reticulum membrane	GO:0005528:molecular_function:FK506 binding	GO:0003755:molecular_function:peptidyl-prolyl cis-trans isomerase activity	GO:0061077:biological_process:chaperone-mediated protein folding	GO:0000413:biological_process:protein peptidyl-prolyl isomerization
Locus_28318.0|BlastHit|gi|82249463|sp|Q4QRJ7.1|EIF2A_DANRE	10644	GO:0003743:molecular_function:translation initiation factor activity	GO:0006417:biological_process:regulation of translation
Locus_28323.0|BlastHit|gi|75041803|sp|Q5R9Y3.1|ABT1_PONAB	10647	GO:0005730:cellular_component:nucleolus	GO:0005667:cellular_component:transcription factor complex	GO:0003677:molecular_function:DNA binding	GO:0000166:molecular_function:nucleotide binding	GO:0044822:molecular_function:poly(A) RNA binding	GO:0006357:biological_process:regulation of transcription from RNA polymerase II promoter	GO:0021522:biological_process:spinal cord motor neuron differentiation	GO:0006366:biological_process:transcription from RNA polymerase II promoter
Locus_28338.0|BlastHit|gi|75024694|sp|Q9TXJ0.1|CMK1_CAEEL	10657	GO:0005634:cellular_component:nucleus	GO:0005524:molecular_function:ATP binding	GO:0004683:molecular_function:calmodulin-dependent protein kinase activity	GO:0046872:molecular_function:metal ion binding	GO:0007275:biological_process:multicellular organismal development
Locus_28349.0|BlastHit|gi|81914299|sp|Q8CDF7.1|EXD1_MOUSE	10665	GO:0008408:molecular_function:3'-5' exonuclease activity	GO:0003676:molecular_function:nucleic acid binding
Locus_28353.1|BlastHit|gi|166215069|sp|Q9V6L0.3|KDM4B_DROME	10668	GO:0005634:cellular_component:nucleus	GO:0051864:molecular_function:histone demethylase activity (H3-K36 specific)	GO:0032454:molecular_function:histone demethylase activity (H3-K9 specific)	GO:0046872:molecular_function:metal ion binding	GO:0016577:biological_process:histone demethylation	GO:0070544:biological_process:histone H3-K36 demethylation	GO:0033169:biological_process:histone H3-K9 demethylation	GO:0045892:biological_process:negative regulation of transcription, DNA-templated	GO:0006351:biological_process:transcription, DNA-templated
Locus_28353.1|BlastHit|gi|166215069|sp|Q9V6L0.3|KDM4B_DROME	10668	GO:0005634:cellular_component:nucleus	GO:0051864:molecular_function:histone demethylase activity (H3-K36 specific)	GO:0032454:molecular_function:histone demethylase activity (H3-K9 specific)	GO:0046872:molecular_function:metal ion binding	GO:0016577:biological_process:histone demethylation	GO:0070544:biological_process:histone H3-K36 demethylation	GO:0033169:biological_process:histone H3-K9 demethylation	GO:0045892:biological_process:negative regulation of transcription, DNA-templated	GO:0006351:biological_process:transcription, DNA-templated
Locus_28358.0|BlastHit|gi|82237116|sp|Q6NRH1.1|DCAF8_XENLA	10672	GO:0005737:cellular_component:cytoplasm	GO:0005634:cellular_component:nucleus
Locus_28361.0|BlastHit|gi|74753513|sp|Q9Y5Z4.1|HEBP2_HUMAN	10674	GO:0005737:cellular_component:cytoplasm	GO:0070062:cellular_component:extracellular vesicular exosome	GO:0005739:cellular_component:mitochondrion	GO:0010917:biological_process:negative regulation of mitochondrial membrane potential	GO:0035794:biological_process:positive regulation of mitochondrial membrane permeability	GO:0010940:biological_process:positive regulation of necrotic cell death
Locus_28365.0|BlastHit|gi|73622220|sp|Q5FW48.1|ASPD_XENTR	10675	GO:0033735:molecular_function:aspartate dehydrogenase activity	GO:0050661:molecular_function:NADP binding	GO:0009435:biological_process:NAD biosynthetic process	GO:0006742:biological_process:NADP catabolic process
Locus_28371.0|BlastHit|gi|122140334|sp|Q3T062.1|RRP15_BOVIN	10680	GO:0005739:cellular_component:mitochondrion	GO:0005730:cellular_component:nucleolus	GO:0005634:cellular_component:nucleus
Locus_28373.0|BlastHit|gi|119367393|sp|Q4H0T5.1|TFAM_PRECR	10681	GO:0042645:cellular_component:mitochondrial nucleoid	GO:0003682:molecular_function:chromatin binding	GO:0008301:molecular_function:DNA binding, bending	GO:0070363:molecular_function:mitochondrial light strand promoter sense binding	GO:0003700:molecular_function:sequence-specific DNA binding transcription factor activity	GO:0045893:biological_process:positive regulation of transcription, DNA-templated	GO:0006390:biological_process:transcription from mitochondrial promoter	GO:0006391:biological_process:transcription initiation from mitochondrial promoter
Locus_28373.0|BlastHit|gi|119367393|sp|Q4H0T5.1|TFAM_PRECR	10682	GO:0042645:cellular_component:mitochondrial nucleoid	GO:0003682:molecular_function:chromatin binding	GO:0008301:molecular_function:DNA binding, bending	GO:0070363:molecular_function:mitochondrial light strand promoter sense binding	GO:0003700:molecular_function:sequence-specific DNA binding transcription factor activity	GO:0045893:biological_process:positive regulation of transcription, DNA-templated	GO:0006390:biological_process:transcription from mitochondrial promoter	GO:0006391:biological_process:transcription initiation from mitochondrial promoter
Locus_28386.0|BlastHit|gi|55584180|sp|Q61753.3|SERA_MOUSE	10694	GO:0070062:cellular_component:extracellular vesicular exosome	GO:0051287:molecular_function:NAD binding	GO:0004617:molecular_function:phosphoglycerate dehydrogenase activity	GO:0070314:biological_process:G1 to G0 transition	GO:0009448:biological_process:gamma-aminobutyric acid metabolic process	GO:0021782:biological_process:glial cell development	GO:0006541:biological_process:glutamine metabolic process	GO:0006544:biological_process:glycine metabolic process	GO:0006564:biological_process:L-serine biosynthetic process	GO:0006563:biological_process:L-serine metabolic process	GO:0021915:biological_process:neural tube development	GO:0022008:biological_process:neurogenesis	GO:0031175:biological_process:neuron projection development	GO:0010468:biological_process:regulation of gene expression	GO:0021510:biological_process:spinal cord development	GO:0019530:biological_process:taurine metabolic process	GO:0006566:biological_process:threonine metabolic process
Locus_28387.0|BlastHit|gi|229463041|sp|O14681.4|EI24_HUMAN	10695	GO:0005789:cellular_component:endoplasmic reticulum membrane	GO:0016021:cellular_component:integral component of membrane	GO:0016020:cellular_component:membrane	GO:0031965:cellular_component:nuclear membrane	GO:0006915:biological_process:apoptotic process	GO:0006914:biological_process:autophagy	GO:0008630:biological_process:intrinsic apoptotic signaling pathway in response to DNA damage	GO:0030308:biological_process:negative regulation of cell growth	GO:0050885:biological_process:neuromuscular process controlling balance	GO:2001244:biological_process:positive regulation of intrinsic apoptotic signaling pathway	GO:0042493:biological_process:response to drug
Locus_28391.0|BlastHit|gi|81906595|sp|Q9JHS9.1|CWC15_MOUSE	10699	GO:0005634:cellular_component:nucleus	GO:0005681:cellular_component:spliceosomal complex	GO:0003723:molecular_function:RNA binding	GO:0000398:biological_process:mRNA splicing, via spliceosome
Locus_28399.0|BlastHit|gi|110816407|sp|Q1RMT7.1|RIOK3_BOVIN	10705	GO:0005524:molecular_function:ATP binding	GO:0004674:molecular_function:protein serine/threonine kinase activity
Locus_28431.0|BlastHit|gi|121956694|sp|Q3T0R7.1|THIM_BOVIN	10731	GO:0070062:cellular_component:extracellular vesicular exosome	GO:0005743:cellular_component:mitochondrial inner membrane	GO:0005739:cellular_component:mitochondrion	GO:0003988:molecular_function:acetyl-CoA C-acyltransferase activity	GO:0044822:molecular_function:poly(A) RNA binding	GO:0071456:biological_process:cellular response to hypoxia	GO:0006631:biological_process:fatty acid metabolic process	GO:1902109:biological_process:negative regulation of mitochondrial membrane permeability involved in apoptotic process	GO:1901029:biological_process:negative regulation of mitochondrial outer membrane permeabilization involved in apoptotic signaling pathway
Locus_28432.0|BlastHit|gi|6016103|sp|O73819.1|GNA14_XENLA	10732	GO:0005525:molecular_function:GTP binding	GO:0003924:molecular_function:GTPase activity	GO:0046872:molecular_function:metal ion binding	GO:0004871:molecular_function:signal transducer activity	GO:0007186:biological_process:G-protein coupled receptor signaling pathway
Locus_28440.0|BlastHit|gi|18201959|sp|O13035.1|SAP_CHICK	10739	GO:0005764:cellular_component:lysosome	GO:0006665:biological_process:sphingolipid metabolic process
Locus_28449.0|BlastHit|gi|12644153|sp|P20007.2|PPCK_DROME	10742	GO:0005525:molecular_function:GTP binding	GO:0046872:molecular_function:metal ion binding	GO:0004613:molecular_function:phosphoenolpyruvate carboxykinase (GTP) activity	GO:0006094:biological_process:gluconeogenesis
Locus_28449.0|BlastHit|gi|12644153|sp|P20007.2|PPCK_DROME	10743	GO:0005525:molecular_function:GTP binding	GO:0046872:molecular_function:metal ion binding	GO:0004613:molecular_function:phosphoenolpyruvate carboxykinase (GTP) activity	GO:0006094:biological_process:gluconeogenesis
Locus_28461.0|BlastHit|gi|81889014|sp|Q5I0D7.1|PEPD_RAT	10750	GO:0070062:cellular_component:extracellular vesicular exosome	GO:0004177:molecular_function:aminopeptidase activity	GO:0016805:molecular_function:dipeptidase activity	GO:0030145:molecular_function:manganese ion binding	GO:0008237:molecular_function:metallopeptidase activity	GO:0008233:molecular_function:peptidase activity	GO:0030574:biological_process:collagen catabolic process
Locus_28474.0|BlastHit|gi|81886959|sp|P70684.1|PGDH_CAVPO	10758	GO:0005737:cellular_component:cytoplasm	GO:0016404:molecular_function:15-hydroxyprostaglandin dehydrogenase (NAD+) activity	GO:0003824:molecular_function:catalytic activity	GO:0051287:molecular_function:NAD binding	GO:0070403:molecular_function:NAD+ binding	GO:0004957:molecular_function:prostaglandin E receptor activity	GO:0097070:biological_process:ductus arteriosus closure	GO:0007565:biological_process:female pregnancy	GO:0045786:biological_process:negative regulation of cell cycle	GO:0030728:biological_process:ovulation	GO:0007567:biological_process:parturition	GO:0006693:biological_process:prostaglandin metabolic process	GO:0070493:biological_process:thrombin receptor signaling pathway	GO:0007179:biological_process:transforming growth factor beta receptor signaling pathway
Locus_28493.0|BlastHit|gi|75027588|sp|Q9VVA0.1|Y9705_DROME	10772	GO:0003677:molecular_function:DNA binding	GO:0048813:biological_process:dendrite morphogenesis	GO:0006355:biological_process:regulation of transcription, DNA-templated
Locus_28498.0|BlastHit|gi|29428062|sp|Q9VDE5.1|PPAN_DROME	10774	GO:0005730:cellular_component:nucleolus	GO:0044822:molecular_function:poly(A) RNA binding	GO:0001560:biological_process:regulation of cell growth by extracellular stimulus
Locus_28506.0|BlastHit|gi|12585261|sp|Q9U639.1|HSP7D_MANSE	10795	GO:0005524:molecular_function:ATP binding
Locus_28506.0|BlastHit|gi|12585261|sp|Q9U639.1|HSP7D_MANSE	10796	GO:0005524:molecular_function:ATP binding
Locus_28533.0|BlastHit|gi|108860789|sp|Q2KIZ8.1|MCM6_BOVIN	10826	GO:0042555:cellular_component:MCM complex	GO:0005634:cellular_component:nucleus	GO:0005524:molecular_function:ATP binding	GO:0003677:molecular_function:DNA binding	GO:0003678:molecular_function:DNA helicase activity	GO:0007049:biological_process:cell cycle	GO:0006270:biological_process:DNA replication initiation
Locus_28549.0|BlastHit|gi|33518622|sp|Q9VHR8.2|DPP3_DROME	10844	GO:0005737:cellular_component:cytoplasm	GO:0070062:cellular_component:extracellular vesicular exosome	GO:0005634:cellular_component:nucleus	GO:0005886:cellular_component:plasma membrane	GO:0008239:molecular_function:dipeptidyl-peptidase activity	GO:0008237:molecular_function:metallopeptidase activity	GO:0008270:molecular_function:zinc ion binding	GO:0006508:biological_process:proteolysis
Locus_28563.0|BlastHit|gi|296439475|sp|Q9NRY5.4|F1142_HUMAN	10857	GO:0017076:molecular_function:purine nucleotide binding
Locus_28567.0|BlastHit|gi|8928549|sp|O75027.2|ABCB7_HUMAN	10860	GO:0016021:cellular_component:integral component of membrane	GO:0005743:cellular_component:mitochondrial inner membrane	GO:0005524:molecular_function:ATP binding	GO:0042626:molecular_function:ATPase activity, coupled to transmembrane movement of substances	GO:0006879:biological_process:cellular iron ion homeostasis	GO:0055085:biological_process:transmembrane transport
Locus_28574.0|BlastHit|gi|13124177|sp|O61491.1|FLOT1_DROME	10865	GO:0005737:cellular_component:cytoplasm	GO:0016600:cellular_component:flotillin complex	GO:0005886:cellular_component:plasma membrane	GO:0005198:molecular_function:structural molecule activity	GO:0007275:biological_process:multicellular organismal development
Locus_28575.0|BlastHit|gi|417289|sp|Q00719.1|MDMC_STRMY	10866	GO:0046872:molecular_function:metal ion binding	GO:0008171:molecular_function:O-methyltransferase activity	GO:0017000:biological_process:antibiotic biosynthetic process
Locus_28575.1|BlastHit|gi|75014084|sp|Q86IC8.1|CAMT2_DICDI	10867	GO:0045335:cellular_component:phagocytic vesicle	GO:0042409:molecular_function:caffeoyl-CoA O-methyltransferase activity	GO:0046872:molecular_function:metal ion binding	GO:0009617:biological_process:response to bacterium
Locus_28578.0|BlastHit|gi|13124624|sp|Q9V359.1|VPS28_DROME	10870	GO:0000813:cellular_component:ESCRT I complex	GO:0030036:biological_process:actin cytoskeleton organization	GO:0000046:biological_process:autophagic vacuole fusion	GO:0006914:biological_process:autophagy	GO:0048749:biological_process:compound eye development	GO:0009792:biological_process:embryo development ending in birth or egg hatching	GO:0032509:biological_process:endosome transport via multivesicular body sorting pathway	GO:0060429:biological_process:epithelium development	GO:0030727:biological_process:germarium-derived female germ-line cyst formation	GO:0042059:biological_process:negative regulation of epidermal growth factor receptor signaling pathway	GO:0044130:biological_process:negative regulation of growth of symbiont in host	GO:0030713:biological_process:ovarian follicle cell stalk formation	GO:0015031:biological_process:protein transport	GO:0010796:biological_process:regulation of multivesicular body size	GO:0008593:biological_process:regulation of Notch signaling pathway	GO:0007291:biological_process:sperm individualization	GO:0043162:biological_process:ubiquitin-dependent protein catabolic process via the multivesicular body sorting pathway
Locus_28595.0|BlastHit|gi|14286157|sp|Q01604.2|PGK_DROME	10882	GO:0031430:cellular_component:M band	GO:0030018:cellular_component:Z disc	GO:0005524:molecular_function:ATP binding	GO:0004618:molecular_function:phosphoglycerate kinase activity	GO:0006096:biological_process:glycolytic process	GO:0046716:biological_process:muscle cell cellular homeostasis	GO:0007520:biological_process:myoblast fusion	GO:0016310:biological_process:phosphorylation	GO:0007525:biological_process:somatic muscle development	GO:0007268:biological_process:synaptic transmission
Locus_28604.0|BlastHit|gi|38257780|sp|Q9NXK8.1|FXL12_HUMAN	10891	GO:0005813:cellular_component:centrosome	GO:0005737:cellular_component:cytoplasm	GO:0019005:cellular_component:SCF ubiquitin ligase complex	GO:0000151:cellular_component:ubiquitin ligase complex	GO:0004842:molecular_function:ubiquitin-protein transferase activity	GO:0008283:biological_process:cell proliferation	GO:0000086:biological_process:G2/M transition of mitotic cell cycle	GO:0007067:biological_process:mitotic nuclear division	GO:0016567:biological_process:protein ubiquitination	GO:0031146:biological_process:SCF-dependent proteasomal ubiquitin-dependent protein catabolic process	GO:0006511:biological_process:ubiquitin-dependent protein catabolic process
Locus_28604.0|BlastHit|gi|38257780|sp|Q9NXK8.1|FXL12_HUMAN	10893	GO:0005813:cellular_component:centrosome	GO:0005737:cellular_component:cytoplasm	GO:0019005:cellular_component:SCF ubiquitin ligase complex	GO:0000151:cellular_component:ubiquitin ligase complex	GO:0004842:molecular_function:ubiquitin-protein transferase activity	GO:0008283:biological_process:cell proliferation	GO:0000086:biological_process:G2/M transition of mitotic cell cycle	GO:0007067:biological_process:mitotic nuclear division	GO:0016567:biological_process:protein ubiquitination	GO:0031146:biological_process:SCF-dependent proteasomal ubiquitin-dependent protein catabolic process	GO:0006511:biological_process:ubiquitin-dependent protein catabolic process
Locus_28615.0|BlastHit|gi|20455192|sp|Q9UKK9.1|NUDT5_HUMAN	10907	GO:0005829:cellular_component:cytosol	GO:0070062:cellular_component:extracellular vesicular exosome	GO:0005622:cellular_component:intracellular	GO:0005634:cellular_component:nucleus	GO:0047631:molecular_function:ADP-ribose diphosphatase activity	GO:0019144:molecular_function:ADP-sugar diphosphatase activity	GO:0000287:molecular_function:magnesium ion binding	GO:0017110:molecular_function:nucleoside-diphosphatase activity	GO:0030515:molecular_function:snoRNA binding	GO:0019303:biological_process:D-ribose catabolic process	GO:0034656:biological_process:nucleobase-containing small molecule catabolic process	GO:0055086:biological_process:nucleobase-containing small molecule metabolic process	GO:0009117:biological_process:nucleotide metabolic process	GO:0009191:biological_process:ribonucleoside diphosphate catabolic process	GO:0044281:biological_process:small molecule metabolic process
Locus_28616.0|BlastHit|gi|114162|sp|P18824.1|ARM_DROME	10908	GO:0005912:cellular_component:adherens junction	GO:0016324:cellular_component:apical plasma membrane	GO:0016327:cellular_component:apicolateral plasma membrane	GO:0030424:cellular_component:axon	GO:0016323:cellular_component:basolateral plasma membrane	GO:0016342:cellular_component:catenin complex	GO:0005737:cellular_component:cytoplasm	GO:0009898:cellular_component:cytoplasmic side of plasma membrane	GO:0005829:cellular_component:cytosol	GO:0030057:cellular_component:desmosome	GO:0030139:cellular_component:endocytic vesicle	GO:0005916:cellular_component:fascia adherens	GO:0005634:cellular_component:nucleus	GO:0005886:cellular_component:plasma membrane	GO:0005914:cellular_component:spot adherens junction	GO:0005667:cellular_component:transcription factor complex	GO:0030018:cellular_component:Z disc	GO:0005915:cellular_component:zonula adherens	GO:0045294:molecular_function:alpha-catenin binding	GO:0045296:molecular_function:cadherin binding	GO:0008092:molecular_function:cytoskeletal protein binding	GO:0019900:molecular_function:kinase binding	GO:0032403:molecular_function:protein complex binding	GO:0019901:molecular_function:protein kinase binding	GO:0005198:molecular_function:structural molecule activity	GO:0003713:molecular_function:transcription coactivator activity	GO:0008134:molecular_function:transcription factor binding	GO:0035147:biological_process:branch fusion, open tracheal system	GO:0048754:biological_process:branching morphogenesis of an epithelial tube	GO:0007155:biological_process:cell adhesion	GO:0001709:biological_process:cell fate determination	GO:0000902:biological_process:cell morphogenesis	GO:0035293:biological_process:chitin-based larval cuticle pattern formation	GO:0001745:biological_process:compound eye morphogenesis	GO:0046667:biological_process:compound eye retinal cell programmed cell death	GO:0035017:biological_process:cuticle pattern formation
Locus_28623.0|BlastHit|gi|68566130|sp|Q6P1B1.1|XPP1_MOUSE	10920	GO:0005737:cellular_component:cytoplasm	GO:0005829:cellular_component:cytosol	GO:0070062:cellular_component:extracellular vesicular exosome	GO:0004177:molecular_function:aminopeptidase activity	GO:0030145:molecular_function:manganese ion binding	GO:0070006:molecular_function:metalloaminopeptidase activity	GO:0010815:biological_process:bradykinin catabolic process	GO:0006508:biological_process:proteolysis
Locus_28644.0|BlastHit|gi|205831550|sp|Q03168.2|ASPP_AEDAE	10952	GO:0005764:cellular_component:lysosome	GO:0004190:molecular_function:aspartic-type endopeptidase activity
Locus_28666.0|BlastHit|gi|82184085|sp|Q6GMK6.1|TSN9_DANRE	10979	GO:0016021:cellular_component:integral component of membrane
Locus_28672.0|BlastHit|gi|34395789|sp|Q8TC12.2|RDH11_HUMAN	10983	GO:0005789:cellular_component:endoplasmic reticulum membrane	GO:0016021:cellular_component:integral component of membrane	GO:0005622:cellular_component:intracellular	GO:0001917:cellular_component:photoreceptor inner segment	GO:0052650:molecular_function:NADP-retinol dehydrogenase activity	GO:0004745:molecular_function:retinol dehydrogenase activity	GO:0016062:biological_process:adaptation of rhodopsin mediated signaling	GO:0007603:biological_process:phototransduction, visible light	GO:0042574:biological_process:retinal metabolic process	GO:0001523:biological_process:retinoid metabolic process	GO:0042572:biological_process:retinol metabolic process
Locus_28684.0|BlastHit|gi|187609599|sp|A7SMW7.1|L2HDH_NEMVE	10991	GO:0005739:cellular_component:mitochondrion	GO:0047545:molecular_function:2-hydroxyglutarate dehydrogenase activity
Locus_28689.0|BlastHit|gi|81873757|sp|Q8BH24.1|TM9S4_MOUSE	10996	GO:0016021:cellular_component:integral component of membrane
Locus_28693.0|BlastHit|gi|6016127|sp|Q92820.2|GGH_HUMAN	11000	GO:0005829:cellular_component:cytosol	GO:0005615:cellular_component:extracellular space	GO:0070062:cellular_component:extracellular vesicular exosome	GO:0005764:cellular_component:lysosome	GO:0042470:cellular_component:melanosome	GO:0005634:cellular_component:nucleus	GO:0008238:molecular_function:exopeptidase activity	GO:0034722:molecular_function:gamma-glutamyl-peptidase activity	GO:0008242:molecular_function:omega peptidase activity	GO:0006541:biological_process:glutamine metabolic process	GO:0006508:biological_process:proteolysis	GO:0042493:biological_process:response to drug	GO:0045471:biological_process:response to ethanol	GO:0032868:biological_process:response to insulin	GO:0010043:biological_process:response to zinc ion
Locus_28693.0|BlastHit|gi|6016127|sp|Q92820.2|GGH_HUMAN	11001	GO:0005829:cellular_component:cytosol	GO:0005615:cellular_component:extracellular space	GO:0070062:cellular_component:extracellular vesicular exosome	GO:0005764:cellular_component:lysosome	GO:0042470:cellular_component:melanosome	GO:0005634:cellular_component:nucleus	GO:0008238:molecular_function:exopeptidase activity	GO:0034722:molecular_function:gamma-glutamyl-peptidase activity	GO:0008242:molecular_function:omega peptidase activity	GO:0006541:biological_process:glutamine metabolic process	GO:0006508:biological_process:proteolysis	GO:0042493:biological_process:response to drug	GO:0045471:biological_process:response to ethanol	GO:0032868:biological_process:response to insulin	GO:0010043:biological_process:response to zinc ion
Locus_28697.0|BlastHit|gi|71153176|sp|P22293.2|SUS_DROME	11003	GO:0005654:cellular_component:nucleoplasm	GO:0005700:cellular_component:polytene chromosome	GO:0046872:molecular_function:metal ion binding	GO:0003723:molecular_function:RNA binding	GO:0045892:biological_process:negative regulation of transcription, DNA-templated	GO:0071027:biological_process:nuclear RNA surveillance
Locus_28701.0|BlastHit|gi|122135265|sp|Q29RI9.1|MAT2B_BOVIN	11006	GO:0048269:cellular_component:methionine adenosyltransferase complex	GO:0005739:cellular_component:mitochondrion	GO:0005634:cellular_component:nucleus	GO:0008831:molecular_function:dTDP-4-dehydrorhamnose reductase activity	GO:0048270:molecular_function:methionine adenosyltransferase regulator activity	GO:0045226:biological_process:extracellular polysaccharide biosynthetic process	GO:0006730:biological_process:one-carbon metabolic process	GO:0006556:biological_process:S-adenosylmethionine biosynthetic process
Locus_28703.1|BlastHit|gi|110282935|sp|P20004.4|ACON_BOVIN	11008	GO:0005739:cellular_component:mitochondrion	GO:0005634:cellular_component:nucleus	GO:0051539:molecular_function:4 iron, 4 sulfur cluster binding	GO:0003994:molecular_function:aconitate hydratase activity	GO:0005506:molecular_function:iron ion binding	GO:0006101:biological_process:citrate metabolic process	GO:0006099:biological_process:tricarboxylic acid cycle
Locus_28707.0|BlastHit|gi|2851461|sp|Q03755.2|CUT1_CAEEL	11012	GO:0016021:cellular_component:integral component of membrane	GO:0005634:cellular_component:nucleus	GO:0005886:cellular_component:plasma membrane	GO:0005509:molecular_function:calcium ion binding	GO:0004872:molecular_function:receptor activity	GO:0001525:biological_process:angiogenesis	GO:0009952:biological_process:anterior/posterior pattern specification	GO:0060271:biological_process:cilium morphogenesis	GO:0007368:biological_process:determination of left/right symmetry	GO:0031017:biological_process:exocrine pancreas development	GO:0048699:biological_process:generation of neurons	GO:0021986:biological_process:habenula development	GO:0055016:biological_process:hypochord development	GO:0050768:biological_process:negative regulation of neurogenesis	GO:0001840:biological_process:neural plate development	GO:0061314:biological_process:Notch signaling involved in heart development	GO:0007219:biological_process:Notch signaling pathway	GO:0031016:biological_process:pancreas development	GO:0048936:biological_process:peripheral nervous system neuron axonogenesis	GO:0048337:biological_process:positive regulation of mesodermal cell fate specification	GO:0042663:biological_process:regulation of endodermal cell fate specification	GO:0048259:biological_process:regulation of receptor-mediated endocytosis	GO:0006355:biological_process:regulation of transcription, DNA-templated	GO:0021523:biological_process:somatic motor neuron differentiation	GO:0001756:biological_process:somitogenesis	GO:0021531:biological_process:spinal cord radial glial cell differentiation	GO:0006351:biological_process:transcription, DNA-templated
Locus_28713.0|BlastHit|gi|20177939|sp|Q9NZ01.1|TECR_HUMAN	11018	GO:0005737:cellular_component:cytoplasm	GO:0016021:cellular_component:integral component of membrane	GO:0016627:molecular_function:oxidoreductase activity, acting on the CH-CH group of donors	GO:0006633:biological_process:fatty acid biosynthetic process
Locus_28714.1|BlastHit|gi|82188575|sp|Q7ZV34.1|MCTS1_DANRE	11020	GO:0005737:cellular_component:cytoplasm	GO:0003743:molecular_function:translation initiation factor activity	GO:0007049:biological_process:cell cycle	GO:0006974:biological_process:cellular response to DNA damage stimulus	GO:0040008:biological_process:regulation of growth	GO:0006355:biological_process:regulation of transcription, DNA-templated	GO:0006351:biological_process:transcription, DNA-templated
Locus_28718.0|BlastHit|gi|77416569|sp|Q7T3C7.2|RT4I1_DANRE	11021	GO:0015030:cellular_component:Cajal body	GO:0016020:cellular_component:membrane	GO:0005654:cellular_component:nucleoplasm	GO:0004017:molecular_function:adenylate kinase activity	GO:0005524:molecular_function:ATP binding	GO:0016887:molecular_function:ATPase activity	GO:0046939:biological_process:nucleotide phosphorylation
Locus_28718.0|BlastHit|gi|77416569|sp|Q7T3C7.2|RT4I1_DANRE	11021	GO:0005739:cellular_component:mitochondrion	GO:0016491:molecular_function:oxidoreductase activity	GO:0008270:molecular_function:zinc ion binding
Locus_28727.0|BlastHit|gi|83288378|sp|Q3SYZ8.1|PDLI3_BOVIN	11035	GO:0016021:cellular_component:integral component of membrane	GO:0016020:cellular_component:membrane	GO:0005886:cellular_component:plasma membrane	GO:0008201:molecular_function:heparin binding	GO:0016337:biological_process:single organismal cell-cell adhesion
Locus_28734.0|BlastHit|gi|51316882|sp|Q8WVM8.4|SCFD1_HUMAN	11057	GO:0005801:cellular_component:cis-Golgi network	GO:0005789:cellular_component:endoplasmic reticulum membrane	GO:0032580:cellular_component:Golgi cisterna membrane	GO:0017119:cellular_component:Golgi transport complex	GO:0005798:cellular_component:Golgi-associated vesicle	GO:0005886:cellular_component:plasma membrane	GO:0019905:molecular_function:syntaxin binding	GO:0000902:biological_process:cell morphogenesis	GO:1902902:biological_process:negative regulation of autophagic vacuole assembly	GO:0006909:biological_process:phagocytosis	GO:0006892:biological_process:post-Golgi vesicle-mediated transport	GO:0015031:biological_process:protein transport	GO:0060628:biological_process:regulation of ER to Golgi vesicle-mediated transport	GO:0051223:biological_process:regulation of protein transport	GO:0001666:biological_process:response to hypoxia	GO:0009636:biological_process:response to toxic substance	GO:0006890:biological_process:retrograde vesicle-mediated transport, Golgi to ER	GO:0006904:biological_process:vesicle docking involved in exocytosis
Locus_28742.0|BlastHit|gi|74705530|sp|O15504.1|NUPL2_HUMAN	11067	GO:0031965:cellular_component:nuclear membrane	GO:0005643:cellular_component:nuclear pore	GO:0046872:molecular_function:metal ion binding	GO:0051028:biological_process:mRNA transport	GO:0015031:biological_process:protein transport
Locus_28745.3|BlastHit|gi|73919224|sp|Q6PH85.1|DCNL2_HUMAN	11096	GO:0000151:cellular_component:ubiquitin ligase complex
Locus_28757.0|BlastHit|gi|238065895|sp|B5SNZ6.1|ABRA_PIG	11115	GO:0005856:cellular_component:cytoskeleton	GO:0030017:cellular_component:sarcomere	GO:0035025:biological_process:positive regulation of Rho protein signal transduction	GO:0015031:biological_process:protein transport	GO:0006355:biological_process:regulation of transcription, DNA-templated	GO:0006351:biological_process:transcription, DNA-templated
Locus_28758.1|BlastHit|gi|75070497|sp|Q5R5V4.1|ILK_PONAB	11116	GO:0005925:cellular_component:focal adhesion	GO:0030027:cellular_component:lamellipodium	GO:0005886:cellular_component:plasma membrane	GO:0030017:cellular_component:sarcomere	GO:0005524:molecular_function:ATP binding	GO:0004674:molecular_function:protein serine/threonine kinase activity	GO:0009966:biological_process:regulation of signal transduction
Locus_28764.0|BlastHit|gi|74948427|sp|Q9VRP9.2|BRE1_DROME	11119	GO:0005634:cellular_component:nucleus	GO:0016874:molecular_function:ligase activity	GO:0008270:molecular_function:zinc ion binding	GO:0016570:biological_process:histone modification	GO:0016574:biological_process:histone ubiquitination	GO:0007219:biological_process:Notch signaling pathway	GO:0006909:biological_process:phagocytosis	GO:0006513:biological_process:protein monoubiquitination
Locus_28769.0|BlastHit|gi|129688|sp|P21902.1|PCE_TACTR	11124	GO:0005576:cellular_component:extracellular region	GO:0004252:molecular_function:serine-type endopeptidase activity	GO:0042381:biological_process:hemolymph coagulation
Locus_28778.0|BlastHit|gi|121755|sp|P11167.1|GTR1_RAT	11129	GO:0016323:cellular_component:basolateral plasma membrane	GO:0072562:cellular_component:blood microparticle	GO:0005901:cellular_component:caveola	GO:0005911:cellular_component:cell-cell junction	GO:0030864:cellular_component:cortical actin cytoskeleton	GO:0005737:cellular_component:cytoplasm	GO:0070062:cellular_component:extracellular vesicular exosome	GO:0001939:cellular_component:female pronucleus	GO:0016021:cellular_component:integral component of membrane	GO:0005887:cellular_component:integral component of plasma membrane	GO:0042470:cellular_component:melanosome	GO:0030496:cellular_component:midbody	GO:0005886:cellular_component:plasma membrane	GO:0055056:molecular_function:D-glucose transmembrane transporter activity	GO:0033300:molecular_function:dehydroascorbic acid transporter activity	GO:0005355:molecular_function:glucose transmembrane transporter activity	GO:0019900:molecular_function:kinase binding	GO:0043621:molecular_function:protein self-association	GO:0005351:molecular_function:sugar:proton symporter activity	GO:0042910:molecular_function:xenobiotic transporter activity	GO:0042149:biological_process:cellular response to glucose starvation	GO:0070837:biological_process:dehydroascorbic acid transport	GO:0015758:biological_process:glucose transport	GO:0006461:biological_process:protein complex assembly	GO:0015992:biological_process:proton transport	GO:0006970:biological_process:response to osmotic stress	GO:0042908:biological_process:xenobiotic transport
Locus_28780.0|BlastHit|gi|74872350|sp|Q9W2D6.1|TIM10_DROME	11131	GO:0005743:cellular_component:mitochondrial inner membrane	GO:0042719:cellular_component:mitochondrial intermembrane space protein transporter complex	GO:0046872:molecular_function:metal ion binding	GO:0008565:molecular_function:protein transporter activity	GO:0050829:biological_process:defense response to Gram-negative bacterium	GO:0045824:biological_process:negative regulation of innate immune response	GO:0045039:biological_process:protein import into mitochondrial inner membrane
Locus_28781.0|BlastHit|gi|82228534|sp|Q4V842.1|GPTC4_XENLA	11132	GO:0003676:molecular_function:nucleic acid binding
Locus_28784.0|BlastHit|gi|221222504|sp|Q293F6.2|SSRP1_DROPS	11140	GO:0005694:cellular_component:chromosome	GO:0005634:cellular_component:nucleus	GO:0003677:molecular_function:DNA binding	GO:0003723:molecular_function:RNA binding	GO:0006281:biological_process:DNA repair	GO:0006260:biological_process:DNA replication	GO:0006355:biological_process:regulation of transcription, DNA-templated	GO:0006351:biological_process:transcription, DNA-templated
[truncated: 467 more rows]
