# Supplementary material for: Identification of SNPs potentially related to immune responses and growth performance in Litopenaeus vannamei by RNA-seq analyses
Source: PeerJ. 2018 Jul 4;6:e5154. doi: 10.7717/peerj.5154 (PMC6035726; doi:10.7717/peerj.5154)
Supplement: Table S4 — BlastX hits for unigenes containing SNPs in GO for healthy WSSV-exposed group. Biological Process, Molecular Function and Cellular Component annotation is shown at level 2. [file peerj-06-5154-s004.xlsx]

## Sheet: All_GO_Healthy_unigenes
Locus_id	#Unigene	GO_annotation
Locus_10212.0|BlastHit|gi|1709616|sp|P54399.1|PDI_DROME	1435	GO:0060187:cellular_component:cell pole	GO:0005737:cellular_component:cytoplasm	GO:0012505:cellular_component:endomembrane system	GO:0005783:cellular_component:endoplasmic reticulum	GO:0005788:cellular_component:endoplasmic reticulum lumen	GO:0005615:cellular_component:extracellular space	GO:0045169:cellular_component:fusome	GO:0005811:cellular_component:lipid particle	GO:0043025:cellular_component:neuronal cell body	GO:0005635:cellular_component:nuclear envelope	GO:0048471:cellular_component:perinuclear region of cytoplasm	GO:0005791:cellular_component:rough endoplasmic reticulum	GO:0070732:cellular_component:spindle envelope	GO:0003756:molecular_function:protein disulfide isomerase activity	GO:0045454:biological_process:cell redox homeostasis	GO:0019511:biological_process:peptidyl-proline hydroxylation	GO:0006457:biological_process:protein folding	GO:1902175:biological_process:regulation of oxidative stress-induced intrinsic apoptotic signaling pathway	GO:0034976:biological_process:response to endoplasmic reticulum stress
Locus_10243.0|BlastHit|gi|146324961|sp|Q8CD19.2|LANC3_MOUSE	1440	GO:0003824:molecular_function:catalytic activity
Locus_10654.0|BlastHit|gi|2842718|sp|Q93113.1|GST1D_ANOGA	1511	GO:0018833:molecular_function:DDT-dehydrochlorinase activity	GO:0004364:molecular_function:glutathione transferase activity
Locus_11269.0|BlastHit|gi|212276523|sp|Q9H7B4.4|SMYD3_HUMAN	1619	GO:0005737:cellular_component:cytoplasm	GO:0005634:cellular_component:nucleus	GO:0018024:molecular_function:histone-lysine N-methyltransferase activity	GO:0046872:molecular_function:metal ion binding	GO:0000979:molecular_function:RNA polymerase II core promoter sequence-specific DNA binding	GO:0001162:molecular_function:RNA polymerase II intronic transcription regulatory region sequence-specific DNA binding	GO:0071549:biological_process:cellular response to dexamethasone stimulus	GO:0045184:biological_process:establishment of protein localization	GO:0014904:biological_process:myotube cell development	GO:0006469:biological_process:negative regulation of protein kinase activity	GO:0006334:biological_process:nucleosome assembly	GO:0033138:biological_process:positive regulation of peptidyl-serine phosphorylation	GO:0045944:biological_process:positive regulation of transcription from RNA polymerase II promoter
Locus_11282.0|BlastHit|gi|47117240|sp|Q8K0H5.1|TAF10_MOUSE	1624	GO:0005634:cellular_component:nucleus	GO:0005669:cellular_component:transcription factor TFIID complex	GO:0003677:molecular_function:DNA binding	GO:0006915:biological_process:apoptotic process	GO:0043623:biological_process:cellular protein complex assembly	GO:0006352:biological_process:DNA-templated transcription, initiation	GO:0000082:biological_process:G1/S transition of mitotic cell cycle	GO:0070365:biological_process:hepatocyte differentiation	GO:0001889:biological_process:liver development	GO:0035264:biological_process:multicellular organism growth	GO:0051101:biological_process:regulation of DNA binding	GO:0010468:biological_process:regulation of gene expression	GO:0006355:biological_process:regulation of transcription, DNA-templated
Locus_11295.0|BlastHit|gi|75042568|sp|Q5REX9.1|BRE_PONAB	1627	GO:0070531:cellular_component:BRCA1-A complex	GO:0070552:cellular_component:BRISC complex	GO:0005737:cellular_component:cytoplasm	GO:0005634:cellular_component:nucleus	GO:0031593:molecular_function:polyubiquitin binding	GO:0006915:biological_process:apoptotic process	GO:0016568:biological_process:chromatin modification	GO:0006302:biological_process:double-strand break repair	GO:0031572:biological_process:G2 DNA damage checkpoint	GO:0045739:biological_process:positive regulation of DNA repair	GO:0010212:biological_process:response to ionizing radiation
Locus_11324.0|BlastHit|gi|54039447|sp|Q962R1.1|RS18_SPOFR	1631	GO:0005840:cellular_component:ribosome	GO:0019843:molecular_function:rRNA binding	GO:0003735:molecular_function:structural constituent of ribosome	GO:0006412:biological_process:translation
Locus_11338.0|BlastHit|gi|166991479|sp|A6QLY2.1|GPX7_BOVIN	1634	GO:0005783:cellular_component:endoplasmic reticulum	GO:0005576:cellular_component:extracellular region	GO:0004602:molecular_function:glutathione peroxidase activity	GO:0006979:biological_process:response to oxidative stress
Locus_11343.0|BlastHit|gi|317373564|sp|Q8NHP7.4|EXD1_HUMAN	1635	GO:0008408:molecular_function:3'-5' exonuclease activity	GO:0003676:molecular_function:nucleic acid binding
Locus_11346.0|BlastHit|gi|46396044|sp|Q9VWH4.1|IDH3A_DROME	1637	GO:0005811:cellular_component:lipid particle	GO:0005875:cellular_component:microtubule associated complex	GO:0005739:cellular_component:mitochondrion	GO:0004449:molecular_function:isocitrate dehydrogenase (NAD+) activity	GO:0000287:molecular_function:magnesium ion binding	GO:0051287:molecular_function:NAD binding	GO:0006099:biological_process:tricarboxylic acid cycle
Locus_11367.0|BlastHit|gi|229462978|sp|Q8N8A6.3|DDX51_HUMAN	1643	GO:0016020:cellular_component:membrane	GO:0005730:cellular_component:nucleolus	GO:0005524:molecular_function:ATP binding	GO:0008026:molecular_function:ATP-dependent helicase activity	GO:0044822:molecular_function:poly(A) RNA binding	GO:0006364:biological_process:rRNA processing
Locus_11457.0|BlastHit|gi|82235917|sp|Q6DGN0.1|RERGL_DANRE	1675	GO:0016020:cellular_component:membrane	GO:0005730:cellular_component:nucleolus	GO:0005525:molecular_function:GTP binding	GO:0006184:biological_process:GTP catabolic process	GO:0045943:biological_process:positive regulation of transcription from RNA polymerase I promoter	GO:0007264:biological_process:small GTPase mediated signal transduction	GO:0006351:biological_process:transcription, DNA-templated
Locus_11517.0|BlastHit|gi|73622120|sp|Q9NHD5.1|SAN_DROME	1701	GO:0008280:cellular_component:cohesin core heterodimer	GO:0005737:cellular_component:cytoplasm	GO:0031248:cellular_component:protein acetyltransferase complex	GO:0008080:molecular_function:N-acetyltransferase activity	GO:0046331:biological_process:lateral inhibition	GO:0008152:biological_process:metabolic process	GO:0007067:biological_process:mitotic nuclear division	GO:0007064:biological_process:mitotic sister chromatid cohesion	GO:0048812:biological_process:neuron projection morphogenesis
Locus_11522.0|BlastHit|gi|33112453|sp|Q9VU02.1|SMD1_DROME	1702	GO:0071013:cellular_component:catalytic step 2 spliceosome	GO:0005634:cellular_component:nucleus	GO:0071011:cellular_component:precatalytic spliceosome	GO:0030532:cellular_component:small nuclear ribonucleoprotein complex	GO:0005681:cellular_component:spliceosomal complex	GO:0000398:biological_process:mRNA splicing, via spliceosome
Locus_11592.0|BlastHit|gi|74872851|sp|Q9W5R8.2|RL5_DROME	1727	GO:0022625:cellular_component:cytosolic large ribosomal subunit	GO:0005840:cellular_component:ribosome	GO:0008097:molecular_function:5S rRNA binding	GO:0003723:molecular_function:RNA binding	GO:0003735:molecular_function:structural constituent of ribosome	GO:0000027:biological_process:ribosomal large subunit assembly	GO:0006412:biological_process:translation
Locus_11653.0|BlastHit|gi|47117653|sp|P61165.1|CK010_HUMAN	1749	GO:0016021:cellular_component:integral component of membrane
Locus_11657.0|BlastHit|gi|54039309|sp|P47772.3|RS13_ICTPU	1752	GO:0005840:cellular_component:ribosome	GO:0003735:molecular_function:structural constituent of ribosome	GO:0006412:biological_process:translation
Locus_11693.0|BlastHit|gi|74948048|sp|Q9VIW7.1|RTCB_DROME	1761	GO:0072669:cellular_component:tRNA-splicing ligase complex	GO:0005524:molecular_function:ATP binding	GO:0046872:molecular_function:metal ion binding	GO:0003972:molecular_function:RNA ligase (ATP) activity	GO:0022008:biological_process:neurogenesis	GO:0006388:biological_process:tRNA splicing, via endonucleolytic cleavage and ligation
Locus_11757.0|BlastHit|gi|259016204|sp|Q8IZJ3.2|CPMD8_HUMAN	1785	GO:0005615:cellular_component:extracellular space	GO:0005886:cellular_component:plasma membrane	GO:0004867:molecular_function:serine-type endopeptidase inhibitor activity
Locus_11769.0|BlastHit|gi|12644422|sp|Q24439.2|ATPO_DROME	1790	GO:0005811:cellular_component:lipid particle	GO:0005743:cellular_component:mitochondrial inner membrane	GO:0005739:cellular_component:mitochondrion	GO:0046933:molecular_function:proton-transporting ATP synthase activity, rotational mechanism	GO:0015986:biological_process:ATP synthesis coupled proton transport
Locus_11829.0|BlastHit|gi|116241329|sp|Q86SQ9.3|DHDDS_HUMAN	1807	GO:0005789:cellular_component:endoplasmic reticulum membrane	GO:0016765:molecular_function:transferase activity, transferring alkyl or aryl (other than methyl) groups	GO:0044267:biological_process:cellular protein metabolic process	GO:0006488:biological_process:dolichol-linked oligosaccharide biosynthetic process	GO:0006489:biological_process:dolichyl diphosphate biosynthetic process	GO:0043687:biological_process:post-translational protein modification	GO:0018279:biological_process:protein N-linked glycosylation via asparagine
Locus_11908.0|BlastHit|gi|384950755|sp|G3V9R3.1|ST1D1_RAT	1840	GO:0005737:cellular_component:cytoplasm	GO:0008146:molecular_function:sulfotransferase activity	GO:0006584:biological_process:catecholamine metabolic process	GO:0006629:biological_process:lipid metabolic process
Locus_11908.0|BlastHit|gi|384950755|sp|G3V9R3.1|ST1D1_RAT	1841	GO:0005737:cellular_component:cytoplasm	GO:0008146:molecular_function:sulfotransferase activity	GO:0006584:biological_process:catecholamine metabolic process	GO:0006629:biological_process:lipid metabolic process
Locus_11965.0|BlastHit|gi|74739637|sp|O75935.1|DCTN3_HUMAN	1863	GO:0005813:cellular_component:centrosome	GO:0032154:cellular_component:cleavage furrow	GO:0000777:cellular_component:condensed chromosome kinetochore	GO:0005829:cellular_component:cytosol	GO:0005869:cellular_component:dynactin complex	GO:0030496:cellular_component:midbody	GO:0048471:cellular_component:perinuclear region of cytoplasm	GO:0005819:cellular_component:spindle	GO:0005198:molecular_function:structural molecule activity	GO:0019886:biological_process:antigen processing and presentation of exogenous peptide antigen via MHC class II	GO:0000910:biological_process:cytokinesis	GO:0000086:biological_process:G2/M transition of mitotic cell cycle	GO:0007017:biological_process:microtubule-based process	GO:0000278:biological_process:mitotic cell cycle	GO:0007067:biological_process:mitotic nuclear division
Locus_11981.0|BlastHit|gi|115502851|sp|Q1HR79.1|TCTP_AEDAE	1873	GO:0005737:cellular_component:cytoplasm
Locus_11992.0|BlastHit|gi|41688549|sp|Q8WQA4.2|EXC4_CAEEL	1876	GO:0043296:cellular_component:apical junction complex	GO:0016324:cellular_component:apical plasma membrane	GO:0034707:cellular_component:chloride channel complex	GO:0005887:cellular_component:integral component of plasma membrane	GO:0005764:cellular_component:lysosome	GO:0005254:molecular_function:chloride channel activity	GO:0005244:molecular_function:voltage-gated ion channel activity	GO:0002064:biological_process:epithelial cell development	GO:0035150:biological_process:regulation of tube size
Locus_12003.0|BlastHit|gi|218511884|sp|Q00341.2|VIGLN_HUMAN	1878	GO:0005737:cellular_component:cytoplasm	GO:0034364:cellular_component:high-density lipoprotein particle	GO:0005634:cellular_component:nucleus	GO:0005886:cellular_component:plasma membrane	GO:0008289:molecular_function:lipid binding	GO:0044822:molecular_function:poly(A) RNA binding	GO:0008203:biological_process:cholesterol metabolic process	GO:0006869:biological_process:lipid transport
Locus_13243.0|BlastHit|gi|110825729|sp|P05661.4|MYSA_DROME	2076	GO:0031672:cellular_component:A band	GO:0016459:cellular_component:myosin complex	GO:0032982:cellular_component:myosin filament	GO:0005703:cellular_component:polytene chromosome puff	GO:0030017:cellular_component:sarcomere	GO:0030898:molecular_function:actin-dependent ATPase activity	GO:0005524:molecular_function:ATP binding	GO:0042623:molecular_function:ATPase activity, coupled	GO:0003774:molecular_function:motor activity	GO:0042803:molecular_function:protein homodimerization activity	GO:0008307:molecular_function:structural constituent of muscle	GO:0007527:biological_process:adult somatic muscle development	GO:0006200:biological_process:ATP catabolic process	GO:0007298:biological_process:border follicle cell migration	GO:0007427:biological_process:epithelial cell migration, open tracheal system	GO:0060361:biological_process:flight	GO:0040011:biological_process:locomotion	GO:0042692:biological_process:muscle cell differentiation	GO:0006936:biological_process:muscle contraction	GO:0007517:biological_process:muscle organ development	GO:0030239:biological_process:myofibril assembly	GO:0031033:biological_process:myosin filament organization	GO:0050821:biological_process:protein stabilization	GO:0045214:biological_process:sarcomere organization	GO:0030241:biological_process:skeletal muscle myosin thick filament assembly
Locus_13809.0|BlastHit|gi|110825729|sp|P05661.4|MYSA_DROME	2160	GO:0031672:cellular_component:A band	GO:0016459:cellular_component:myosin complex	GO:0032982:cellular_component:myosin filament	GO:0005703:cellular_component:polytene chromosome puff	GO:0030017:cellular_component:sarcomere	GO:0030898:molecular_function:actin-dependent ATPase activity	GO:0005524:molecular_function:ATP binding	GO:0042623:molecular_function:ATPase activity, coupled	GO:0003774:molecular_function:motor activity	GO:0042803:molecular_function:protein homodimerization activity	GO:0008307:molecular_function:structural constituent of muscle	GO:0007527:biological_process:adult somatic muscle development	GO:0006200:biological_process:ATP catabolic process	GO:0007298:biological_process:border follicle cell migration	GO:0007427:biological_process:epithelial cell migration, open tracheal system	GO:0060361:biological_process:flight	GO:0040011:biological_process:locomotion	GO:0042692:biological_process:muscle cell differentiation	GO:0006936:biological_process:muscle contraction	GO:0007517:biological_process:muscle organ development	GO:0030239:biological_process:myofibril assembly	GO:0031033:biological_process:myosin filament organization	GO:0050821:biological_process:protein stabilization	GO:0045214:biological_process:sarcomere organization	GO:0030241:biological_process:skeletal muscle myosin thick filament assembly
Locus_14317.0|BlastHit|gi|3122276|sp|O35343.1|IMA4_MOUSE	2236	GO:0005737:cellular_component:cytoplasm	GO:0070062:cellular_component:extracellular vesicular exosome	GO:0005634:cellular_component:nucleus	GO:0008565:molecular_function:protein transporter activity	GO:0006606:biological_process:protein import into nucleus	GO:0042542:biological_process:response to hydrogen peroxide
Locus_14395.0|BlastHit|gi|14423827|sp|Q9VQ62.1|NPC2_DROME	2242	GO:0005615:cellular_component:extracellular space	GO:0030882:molecular_function:lipid antigen binding	GO:0001530:molecular_function:lipopolysaccharide binding	GO:0070891:molecular_function:lipoteichoic acid binding	GO:0042834:molecular_function:peptidoglycan binding	GO:0045456:biological_process:ecdysteroid biosynthetic process	GO:0061057:biological_process:peptidoglycan recognition protein signaling pathway	GO:0055092:biological_process:sterol homeostasis	GO:0015918:biological_process:sterol transport	GO:0008039:biological_process:synaptic target recognition
Locus_14417.0|BlastHit|gi|122145283|sp|Q0IID7.1|DUS10_BOVIN	2249	GO:0005794:cellular_component:Golgi apparatus	GO:0005634:cellular_component:nucleus	GO:0033549:molecular_function:MAP kinase phosphatase activity	GO:0017017:molecular_function:MAP kinase tyrosine/serine/threonine phosphatase activity	GO:0004725:molecular_function:protein tyrosine phosphatase activity	GO:0008138:molecular_function:protein tyrosine/serine/threonine phosphatase activity	GO:0000188:biological_process:inactivation of MAPK activity	GO:0046329:biological_process:negative regulation of JNK cascade	GO:0043508:biological_process:negative regulation of JUN kinase activity	GO:0060266:biological_process:negative regulation of respiratory burst involved in inflammatory response	GO:0048709:biological_process:oligodendrocyte differentiation	GO:0006470:biological_process:protein dephosphorylation	GO:0002819:biological_process:regulation of adaptive immune response	GO:0032496:biological_process:response to lipopolysaccharide
Locus_14445.0|BlastHit|gi|41017797|sp|Q9H0U6.1|RM18_HUMAN	2257	GO:0005615:cellular_component:extracellular space	GO:0005761:cellular_component:mitochondrial ribosome	GO:0005739:cellular_component:mitochondrion	GO:0008097:molecular_function:5S rRNA binding	GO:0003735:molecular_function:structural constituent of ribosome	GO:0035928:biological_process:rRNA import into mitochondrion	GO:0006412:biological_process:translation
Locus_14587.0|BlastHit|gi|1176780|sp|Q09506.1|YQI7_CAEEL	2294	GO:0030111:biological_process:regulation of Wnt signaling pathway
Locus_14631.0|BlastHit|gi|18202731|sp|Q9BQ67.1|GRWD1_HUMAN	2304	GO:0005737:cellular_component:cytoplasm	GO:0005730:cellular_component:nucleolus	GO:0005634:cellular_component:nucleus	GO:0044822:molecular_function:poly(A) RNA binding
Locus_14647.0|BlastHit|gi|25091510|sp|Q99PK0.1|SYF1_RAT	2308	GO:0071013:cellular_component:catalytic step 2 spliceosome	GO:0016020:cellular_component:membrane	GO:0005654:cellular_component:nucleoplasm	GO:0005634:cellular_component:nucleus	GO:0001824:biological_process:blastocyst development	GO:0006281:biological_process:DNA repair	GO:0000398:biological_process:mRNA splicing, via spliceosome	GO:0006289:biological_process:nucleotide-excision repair	GO:0006351:biological_process:transcription, DNA-templated	GO:0006283:biological_process:transcription-coupled nucleotide-excision repair
Locus_14937.0|BlastHit|gi|74949008|sp|Q9W3T5.1|U640_DROME	2379	GO:0005576:cellular_component:extracellular region
Locus_14937.0|BlastHit|gi|74949008|sp|Q9W3T5.1|U640_DROME	2379	GO:0016021:cellular_component:integral component of membrane
Locus_14952.0|BlastHit|gi|12643482|sp|P57093.2|PAHX_RAT	2386	GO:0005739:cellular_component:mitochondrion	GO:0005777:cellular_component:peroxisome	GO:0048037:molecular_function:cofactor binding	GO:0031418:molecular_function:L-ascorbic acid binding	GO:0046872:molecular_function:metal ion binding	GO:0048244:molecular_function:phytanoyl-CoA dioxygenase activity	GO:0001561:biological_process:fatty acid alpha-oxidation	GO:0006720:biological_process:isoprenoid metabolic process	GO:0097089:biological_process:methyl-branched fatty acid metabolic process
Locus_14961.0|BlastHit|gi|22096358|sp|P14318.2|MP20_DROME	2390	GO:0003779:molecular_function:actin binding	GO:0007155:biological_process:cell adhesion	GO:0007520:biological_process:myoblast fusion	GO:0008360:biological_process:regulation of cell shape	GO:1901739:biological_process:regulation of myoblast fusion
Locus_15065.0|BlastHit|gi|131796|sp|P20340.3|RAB6A_HUMAN	2427	GO:0030054:cellular_component:cell junction	GO:0016023:cellular_component:cytoplasmic membrane-bounded vesicle	GO:0005794:cellular_component:Golgi apparatus	GO:0000139:cellular_component:Golgi membrane	GO:0043025:cellular_component:neuronal cell body	GO:0043204:cellular_component:perikaryon	GO:0045202:cellular_component:synapse	GO:0005525:molecular_function:GTP binding	GO:0003924:molecular_function:GTPase activity	GO:0007411:biological_process:axon guidance	GO:0001745:biological_process:compound eye morphogenesis	GO:0050832:biological_process:defense response to fungus	GO:0006887:biological_process:exocytosis	GO:0007293:biological_process:germarium-derived egg chamber formation	GO:0006184:biological_process:GTP catabolic process	GO:0008103:biological_process:oocyte microtubule cytoskeleton polarization	GO:0045451:biological_process:pole plasm oskar mRNA localization	GO:0015031:biological_process:protein transport	GO:0045467:biological_process:R7 cell development	GO:0060078:biological_process:regulation of postsynaptic membrane potential	GO:0007264:biological_process:small GTPase mediated signal transduction
Locus_15194.0|BlastHit|gi|73621844|sp|Q9DBE9.1|RRMJ3_MOUSE	2469	GO:0005730:cellular_component:nucleolus	GO:0030688:cellular_component:preribosome, small subunit precursor	GO:0044822:molecular_function:poly(A) RNA binding	GO:0008649:molecular_function:rRNA methyltransferase activity	GO:0000453:biological_process:enzyme-directed rRNA 2'-O-methylation
Locus_15262.0|BlastHit|gi|50400799|sp|Q9VZ23.1|RAN_DROME	2496	GO:0005938:cellular_component:cell cortex	GO:0005737:cellular_component:cytoplasm	GO:0005811:cellular_component:lipid particle	GO:0005875:cellular_component:microtubule associated complex	GO:0072686:cellular_component:mitotic spindle	GO:0005880:cellular_component:nuclear microtubule	GO:0005634:cellular_component:nucleus	GO:0005525:molecular_function:GTP binding	GO:0003924:molecular_function:GTPase activity	GO:0007015:biological_process:actin filament organization	GO:0007155:biological_process:cell adhesion	GO:0007049:biological_process:cell cycle	GO:0000132:biological_process:establishment of mitotic spindle orientation	GO:0006886:biological_process:intracellular protein transport	GO:0000212:biological_process:meiotic spindle organization	GO:0007067:biological_process:mitotic nuclear division	GO:0048812:biological_process:neuron projection morphogenesis	GO:0006913:biological_process:nucleocytoplasmic transport	GO:0008360:biological_process:regulation of cell shape	GO:0032880:biological_process:regulation of protein localization	GO:0007264:biological_process:small GTPase mediated signal transduction
Locus_15291.0|BlastHit|gi|17366497|sp|Q24537.1|HMG2_DROME	2508	GO:0005634:cellular_component:nucleus	GO:0005700:cellular_component:polytene chromosome	GO:0003677:molecular_function:DNA binding	GO:0008301:molecular_function:DNA binding, bending	GO:0003697:molecular_function:single-stranded DNA binding	GO:0017025:molecular_function:TBP-class protein binding	GO:0008134:molecular_function:transcription factor binding	GO:0006338:biological_process:chromatin remodeling	GO:0032502:biological_process:developmental process	GO:0006268:biological_process:DNA unwinding involved in DNA replication	GO:0035218:biological_process:leg disc development	GO:0008348:biological_process:negative regulation of antimicrobial humoral response	GO:0017055:biological_process:negative regulation of RNA polymerase II transcriptional preinitiation complex assembly	GO:0000122:biological_process:negative regulation of transcription from RNA polymerase II promoter	GO:0045892:biological_process:negative regulation of transcription, DNA-templated	GO:0043388:biological_process:positive regulation of DNA binding	GO:0007379:biological_process:segment specification
Locus_15292.1|BlastHit|gi|75040217|sp|Q5E996.1|NOP16_BOVIN	2509	GO:0005730:cellular_component:nucleolus	GO:0044822:molecular_function:poly(A) RNA binding
Locus_15306.0|BlastHit|gi|115305838|sp|Q3ZBH0.3|TCPB_BOVIN	2514	GO:0044297:cellular_component:cell body	GO:0005832:cellular_component:chaperonin-containing T-complex	GO:0070062:cellular_component:extracellular vesicular exosome	GO:0005874:cellular_component:microtubule	GO:0002199:cellular_component:zona pellucida receptor complex	GO:0005524:molecular_function:ATP binding	GO:0007339:biological_process:binding of sperm to zona pellucida	GO:0051131:biological_process:chaperone-mediated protein complex assembly	GO:0006457:biological_process:protein folding
Locus_15315.0|BlastHit|gi|12229854|sp|O97725.1|NDUAC_BOVIN	2522	GO:0005747:cellular_component:mitochondrial respiratory chain complex I	GO:0009055:molecular_function:electron carrier activity	GO:0008137:molecular_function:NADH dehydrogenase (ubiquinone) activity	GO:0006979:biological_process:response to oxidative stress
Locus_15367.0|BlastHit|gi|74762123|sp|O95238.1|SPDEF_HUMAN	2538	GO:0005634:cellular_component:nucleus	GO:0043565:molecular_function:sequence-specific DNA binding	GO:0000981:molecular_function:sequence-specific DNA binding RNA polymerase II transcription factor activity	GO:0030154:biological_process:cell differentiation	GO:0060576:biological_process:intestinal epithelial cell development	GO:0060480:biological_process:lung goblet cell differentiation	GO:0007275:biological_process:multicellular organismal development	GO:0010454:biological_process:negative regulation of cell fate commitment	GO:0000122:biological_process:negative regulation of transcription from RNA polymerase II promoter	GO:0043065:biological_process:positive regulation of apoptotic process	GO:0010455:biological_process:positive regulation of cell fate commitment	GO:0045944:biological_process:positive regulation of transcription from RNA polymerase II promoter	GO:0006366:biological_process:transcription from RNA polymerase II promoter
Locus_15375.0|BlastHit|gi|6094094|sp|O57592.3|RL7A_FUGRU	2542	GO:0022625:cellular_component:cytosolic large ribosomal subunit	GO:0070062:cellular_component:extracellular vesicular exosome	GO:0016020:cellular_component:membrane	GO:0005634:cellular_component:nucleus	GO:0042788:cellular_component:polysomal ribosome	GO:0044822:molecular_function:poly(A) RNA binding	GO:0042254:biological_process:ribosome biogenesis
Locus_15375.0|BlastHit|gi|6094094|sp|O57592.3|RL7A_FUGRU	2542	GO:0005840:cellular_component:ribosome	GO:0003735:molecular_function:structural constituent of ribosome	GO:0051298:biological_process:centrosome duplication	GO:0051297:biological_process:centrosome organization	GO:0000022:biological_process:mitotic spindle elongation	GO:0007052:biological_process:mitotic spindle organization	GO:0042254:biological_process:ribosome biogenesis
Locus_15385.0|BlastHit|gi|119164|sp|P12261.3|EF1G_ARTSA	2545	GO:0003746:molecular_function:translation elongation factor activity
Locus_15393.0|BlastHit|gi|52783446|sp|Q6XHI1.1|THIO2_DROYA	2555	GO:0015035:molecular_function:protein disulfide oxidoreductase activity	GO:0045454:biological_process:cell redox homeostasis	GO:0006662:biological_process:glycerol ether metabolic process
Locus_15409.0|BlastHit|gi|82245450|sp|Q90XG0.1|TPISB_DANRE	2561	GO:0004807:molecular_function:triose-phosphate isomerase activity	GO:0006094:biological_process:gluconeogenesis	GO:0006096:biological_process:glycolytic process	GO:0006098:biological_process:pentose-phosphate shunt
Locus_15421.0|BlastHit|gi|5921903|sp|O13085.1|COX6A_ONCMY	2563	GO:0005751:cellular_component:mitochondrial respiratory chain complex IV	GO:0004129:molecular_function:cytochrome-c oxidase activity
Locus_15431.0|BlastHit|gi|128675|sp|P03895.1|NU2M_DROYA	2567	GO:0016021:cellular_component:integral component of membrane	GO:0005743:cellular_component:mitochondrial inner membrane	GO:0070469:cellular_component:respiratory chain	GO:0008137:molecular_function:NADH dehydrogenase (ubiquinone) activity	GO:0006120:biological_process:mitochondrial electron transport, NADH to ubiquinone
Locus_15436.0|BlastHit|gi|81175197|sp|P18489.3|SYB_DROME	2571	GO:0030054:cellular_component:cell junction	GO:0016021:cellular_component:integral component of membrane	GO:0043005:cellular_component:neuron projection	GO:0005886:cellular_component:plasma membrane	GO:0008021:cellular_component:synaptic vesicle	GO:0030672:cellular_component:synaptic vesicle membrane	GO:0005484:molecular_function:SNAP receptor activity	GO:0035149:biological_process:lumen formation, open tracheal system	GO:0007269:biological_process:neurotransmitter secretion	GO:0016081:biological_process:synaptic vesicle docking	GO:0016192:biological_process:vesicle-mediated transport
Locus_15489.0|BlastHit|gi|47117631|sp|Q9H3N1.1|TMX1_HUMAN	2589	GO:0005783:cellular_component:endoplasmic reticulum	GO:0005789:cellular_component:endoplasmic reticulum membrane	GO:0016021:cellular_component:integral component of membrane	GO:0005730:cellular_component:nucleolus	GO:0015036:molecular_function:disulfide oxidoreductase activity	GO:0003756:molecular_function:protein disulfide isomerase activity	GO:0045454:biological_process:cell redox homeostasis	GO:0006457:biological_process:protein folding	GO:0034976:biological_process:response to endoplasmic reticulum stress
Locus_15521.0|BlastHit|gi|14423827|sp|Q9VQ62.1|NPC2_DROME	2600	GO:0005615:cellular_component:extracellular space	GO:0030882:molecular_function:lipid antigen binding	GO:0001530:molecular_function:lipopolysaccharide binding	GO:0070891:molecular_function:lipoteichoic acid binding	GO:0042834:molecular_function:peptidoglycan binding	GO:0045456:biological_process:ecdysteroid biosynthetic process	GO:0061057:biological_process:peptidoglycan recognition protein signaling pathway	GO:0055092:biological_process:sterol homeostasis	GO:0015918:biological_process:sterol transport	GO:0008039:biological_process:synaptic target recognition
Locus_15552.0|BlastHit|gi|134516|sp|P17863.1|SKI_AVIES	2611	GO:0042025:cellular_component:host cell nucleus	GO:0006351:biological_process:transcription, DNA-templated
Locus_15561.0|BlastHit|gi|110278815|sp|Q3SZF2.3|ARF4_BOVIN	2612	GO:0005829:cellular_component:cytosol	GO:0070062:cellular_component:extracellular vesicular exosome	GO:0005794:cellular_component:Golgi apparatus	GO:0032587:cellular_component:ruffle membrane	GO:0005525:molecular_function:GTP binding	GO:0031584:biological_process:activation of phospholipase D activity	GO:0016477:biological_process:cell migration	GO:0043066:biological_process:negative regulation of apoptotic process	GO:0045944:biological_process:positive regulation of transcription from RNA polymerase II promoter	GO:0006471:biological_process:protein ADP-ribosylation	GO:0015031:biological_process:protein transport	GO:2000377:biological_process:regulation of reactive oxygen species metabolic process	GO:0007264:biological_process:small GTPase mediated signal transduction	GO:0016192:biological_process:vesicle-mediated transport
Locus_15587.0|BlastHit|gi|41018133|sp|Q9CR88.1|RT14_MOUSE	2623	GO:0005763:cellular_component:mitochondrial small ribosomal subunit	GO:0005739:cellular_component:mitochondrion	GO:0031965:cellular_component:nuclear membrane	GO:0044822:molecular_function:poly(A) RNA binding	GO:0003735:molecular_function:structural constituent of ribosome	GO:0006412:biological_process:translation
Locus_15613.0|BlastHit|gi|74960641|sp|O76483.1|GSTT7_ANOGA	2635	GO:0005576:cellular_component:extracellular region	GO:0004364:molecular_function:glutathione transferase activity	GO:0006749:biological_process:glutathione metabolic process
Locus_15717.0|BlastHit|gi|296434394|sp|Q96Q42.2|ALS2_HUMAN	2657	GO:0005813:cellular_component:centrosome	GO:0005829:cellular_component:cytosol	GO:0030425:cellular_component:dendrite	GO:0043197:cellular_component:dendritic spine	GO:0005769:cellular_component:early endosome	GO:0030426:cellular_component:growth cone	GO:0030027:cellular_component:lamellipodium	GO:0014069:cellular_component:postsynaptic density	GO:0043234:cellular_component:protein complex	GO:0001726:cellular_component:ruffle	GO:0031982:cellular_component:vesicle	GO:0042803:molecular_function:protein homodimerization activity	GO:0043539:molecular_function:protein serine/threonine kinase activator activity	GO:0017137:molecular_function:Rab GTPase binding	GO:0017112:molecular_function:Rab guanyl-nucleotide exchange factor activity	GO:0030676:molecular_function:Rac guanyl-nucleotide exchange factor activity	GO:0005087:molecular_function:Ran guanyl-nucleotide exchange factor activity	GO:0001662:biological_process:behavioral fear response	GO:0016197:biological_process:endosomal transport	GO:0007032:biological_process:endosome organization	GO:0007626:biological_process:locomotory behavior	GO:0007528:biological_process:neuromuscular junction development	GO:0048812:biological_process:neuron projection morphogenesis	GO:0045860:biological_process:positive regulation of protein kinase activity	GO:0071902:biological_process:positive regulation of protein serine/threonine kinase activity	GO:0032851:biological_process:positive regulation of Rab GTPase activity	GO:0032855:biological_process:positive regulation of Rac GTPase activity	GO:0035022:biological_process:positive regulation of Rac protein signal transduction	GO:0032853:biological_process:positive regulation of Ran GTPase activity	GO:0008104:biological_process:protein localization	GO:0001881:biological_process:receptor recycling	GO:0051036:biological_process:regulation of endosome size
Locus_16270.0|BlastHit|gi|81905675|sp|Q9D8P4.1|RM17_MOUSE	2807	GO:0005743:cellular_component:mitochondrial inner membrane	GO:0005762:cellular_component:mitochondrial large ribosomal subunit	GO:0005739:cellular_component:mitochondrion	GO:0003735:molecular_function:structural constituent of ribosome	GO:0000002:biological_process:mitochondrial genome maintenance	GO:0006412:biological_process:translation
Locus_16329.0|BlastHit|gi|119370654|sp|Q28C98.1|MESH1_XENTR	2825	GO:0008893:molecular_function:guanosine-3',5'-bis(diphosphate) 3'-diphosphatase activity	GO:0046872:molecular_function:metal ion binding
Locus_16428.0|BlastHit|gi|94730445|sp|P51523.2|ZNF84_HUMAN	2853	GO:0005634:cellular_component:nucleus	GO:0003677:molecular_function:DNA binding	GO:0046872:molecular_function:metal ion binding	GO:0006355:biological_process:regulation of transcription, DNA-templated	GO:0050896:biological_process:response to stimulus	GO:0006351:biological_process:transcription, DNA-templated	GO:0007601:biological_process:visual perception
Locus_16454.0|BlastHit|gi|52782788|sp|Q91WN1.2|DNJC9_MOUSE	2860	GO:0005634:cellular_component:nucleus	GO:0035176:biological_process:social behavior
Locus_16497.0|BlastHit|gi|116248550|sp|Q53H12.2|AGK_HUMAN	2867	GO:0043231:cellular_component:intracellular membrane-bounded organelle	GO:0031966:cellular_component:mitochondrial membrane	GO:0005739:cellular_component:mitochondrion	GO:0047620:molecular_function:acylglycerol kinase activity	GO:0005524:molecular_function:ATP binding	GO:0001729:molecular_function:ceramide kinase activity	GO:0004143:molecular_function:diacylglycerol kinase activity	GO:0003951:molecular_function:NAD+ kinase activity	GO:0046513:biological_process:ceramide biosynthetic process	GO:0046486:biological_process:glycerolipid metabolic process	GO:0007205:biological_process:protein kinase C-activating G-protein coupled receptor signaling pathway
Locus_16764.0|BlastHit|gi|296434488|sp|Q66K89.2|E4F1_HUMAN	2941	GO:0005737:cellular_component:cytoplasm	GO:0005654:cellular_component:nucleoplasm	GO:0005634:cellular_component:nucleus	GO:0005819:cellular_component:spindle	GO:0035497:molecular_function:cAMP response element binding	GO:0003677:molecular_function:DNA binding	GO:0016874:molecular_function:ligase activity	GO:0046872:molecular_function:metal ion binding	GO:0000977:molecular_function:RNA polymerase II regulatory region sequence-specific DNA binding	GO:0001227:molecular_function:RNA polymerase II transcription regulatory region sequence-specific DNA binding transcription factor activity involved in negative regulation of transcription	GO:0003700:molecular_function:sequence-specific DNA binding transcription factor activity	GO:0003713:molecular_function:transcription coactivator activity	GO:0003714:molecular_function:transcription corepressor activity	GO:0008283:biological_process:cell proliferation	GO:0006260:biological_process:DNA replication	GO:0071850:biological_process:mitotic cell cycle arrest	GO:0007067:biological_process:mitotic nuclear division	GO:0000122:biological_process:negative regulation of transcription from RNA polymerase II promoter	GO:0016567:biological_process:protein ubiquitination	GO:0010564:biological_process:regulation of cell cycle process	GO:0040008:biological_process:regulation of growth	GO:0009794:biological_process:regulation of mitotic cell cycle, embryonic	GO:0016032:biological_process:viral process
Locus_16769.0|BlastHit|gi|47117842|sp|P29775.3|ETS4_DROME	2947	GO:0005634:cellular_component:nucleus	GO:0043565:molecular_function:sequence-specific DNA binding	GO:0000981:molecular_function:sequence-specific DNA binding RNA polymerase II transcription factor activity	GO:0030154:biological_process:cell differentiation	GO:0006357:biological_process:regulation of transcription from RNA polymerase II promoter	GO:0006366:biological_process:transcription from RNA polymerase II promoter
Locus_16857.0|BlastHit|gi|82200999|sp|Q6GM44.1|MARH5_XENLA	2972	GO:0005783:cellular_component:endoplasmic reticulum	GO:0005789:cellular_component:endoplasmic reticulum membrane	GO:0016021:cellular_component:integral component of membrane	GO:0005741:cellular_component:mitochondrial outer membrane	GO:0016874:molecular_function:ligase activity	GO:0004842:molecular_function:ubiquitin-protein transferase activity	GO:0008270:molecular_function:zinc ion binding	GO:0090344:biological_process:negative regulation of cell aging	GO:0090141:biological_process:positive regulation of mitochondrial fission	GO:0051865:biological_process:protein autoubiquitination	GO:0070585:biological_process:protein localization to mitochondrion	GO:0000209:biological_process:protein polyubiquitination	GO:0090140:biological_process:regulation of mitochondrial fission
Locus_16874.0|BlastHit|gi|14917101|sp|O45405.2|EXL1_CAEEL	2976	GO:0015629:cellular_component:actin cytoskeleton	GO:0034707:cellular_component:chloride channel complex	GO:0070062:cellular_component:extracellular vesicular exosome	GO:0005794:cellular_component:Golgi apparatus	GO:0005815:cellular_component:microtubule organizing center	GO:0032420:cellular_component:stereocilium	GO:0032421:cellular_component:stereocilium bundle	GO:0005254:molecular_function:chloride channel activity	GO:0005247:molecular_function:voltage-gated chloride channel activity	GO:0060088:biological_process:auditory receptor cell stereocilium organization	GO:1902476:biological_process:chloride transmembrane transport	GO:0002024:biological_process:diet induced thermogenesis	GO:0050885:biological_process:neuromuscular process controlling balance	GO:0008104:biological_process:protein localization	GO:0007605:biological_process:sensory perception of sound
Locus_17047.0|BlastHit|gi|74752020|sp|Q96LU5.1|IMP1L_HUMAN	3044	GO:0005743:cellular_component:mitochondrial inner membrane	GO:0005739:cellular_component:mitochondrion	GO:0008236:molecular_function:serine-type peptidase activity	GO:0006627:biological_process:protein processing involved in protein targeting to mitochondrion
Locus_17085.0|BlastHit|gi|82228760|sp|Q502K3.1|ANR52_DANRE	3054	GO:0005654:cellular_component:nucleoplasm
Locus_17127.0|BlastHit|gi|75070060|sp|Q5E9X4.1|LRC59_BOVIN	3072	GO:0005783:cellular_component:endoplasmic reticulum	GO:0005789:cellular_component:endoplasmic reticulum membrane	GO:0016021:cellular_component:integral component of membrane	GO:0016020:cellular_component:membrane	GO:0042645:cellular_component:mitochondrial nucleoid	GO:0005635:cellular_component:nuclear envelope	GO:0044822:molecular_function:poly(A) RNA binding
Locus_17133.0|BlastHit|gi|81889667|sp|Q5U300.1|UBA1_RAT	3078	GO:0005737:cellular_component:cytoplasm	GO:0005829:cellular_component:cytosol	GO:0030057:cellular_component:desmosome	GO:0010008:cellular_component:endosome membrane	GO:0070062:cellular_component:extracellular vesicular exosome	GO:0000792:cellular_component:heterochromatin	GO:0005765:cellular_component:lysosomal membrane	GO:0005739:cellular_component:mitochondrion	GO:0005634:cellular_component:nucleus	GO:0030867:cellular_component:rough endoplasmic reticulum membrane	GO:0005524:molecular_function:ATP binding	GO:0044822:molecular_function:poly(A) RNA binding	GO:0004839:molecular_function:ubiquitin activating enzyme activity	GO:0004842:molecular_function:ubiquitin-protein transferase activity	GO:0006974:biological_process:cellular response to DNA damage stimulus	GO:0019941:biological_process:modification-dependent protein catabolic process	GO:0016567:biological_process:protein ubiquitination
Locus_17150.0|BlastHit|gi|172048427|sp|A9UMU8.1|CG059_XENTR	3087	GO:0005764:cellular_component:lysosome	GO:0071986:cellular_component:Ragulator complex	GO:0071230:biological_process:cellular response to amino acid stimulus	GO:0043547:biological_process:positive regulation of GTPase activity	GO:0032008:biological_process:positive regulation of TOR signaling	GO:0061462:biological_process:protein localization to lysosome	GO:0008361:biological_process:regulation of cell size
Locus_17173.0|BlastHit|gi|121928|sp|P15870.1|H1D_STRPU	3100	GO:0000786:cellular_component:nucleosome	GO:0005634:cellular_component:nucleus	GO:0003677:molecular_function:DNA binding	GO:0030261:biological_process:chromosome condensation	GO:0006334:biological_process:nucleosome assembly
Locus_17182.0|BlastHit|gi|48428674|sp|Q98SN8.3|S61A2_ONCMY	3105	GO:0005789:cellular_component:endoplasmic reticulum membrane	GO:0016021:cellular_component:integral component of membrane	GO:0015031:biological_process:protein transport
Locus_17185.0|BlastHit|gi|30316286|sp|Q9C285.1|RL12_NEUCR	3107	GO:0016021:cellular_component:integral component of membrane
Locus_17185.0|BlastHit|gi|30316286|sp|Q9C285.1|RL12_NEUCR	3107	GO:0016021:cellular_component:integral component of membrane
Locus_17185.0|BlastHit|gi|30316286|sp|Q9C285.1|RL12_NEUCR	3107	GO:0005840:cellular_component:ribosome	GO:0003723:molecular_function:RNA binding	GO:0003735:molecular_function:structural constituent of ribosome	GO:0006412:biological_process:translation
Locus_17187.0|BlastHit|gi|81884209|sp|Q66HF1.1|NDUS1_RAT	3108	GO:0005758:cellular_component:mitochondrial intermembrane space	GO:0005747:cellular_component:mitochondrial respiratory chain complex I	GO:0051537:molecular_function:2 iron, 2 sulfur cluster binding	GO:0051539:molecular_function:4 iron, 4 sulfur cluster binding	GO:0009055:molecular_function:electron carrier activity	GO:0046872:molecular_function:metal ion binding	GO:0008137:molecular_function:NADH dehydrogenase (ubiquinone) activity	GO:0008637:biological_process:apoptotic mitochondrial changes	GO:0046034:biological_process:ATP metabolic process	GO:0042773:biological_process:ATP synthesis coupled electron transport	GO:0045333:biological_process:cellular respiration	GO:0072593:biological_process:reactive oxygen species metabolic process	GO:0051881:biological_process:regulation of mitochondrial membrane potential
Locus_17188.0|BlastHit|gi|132653|sp|P23358.1|RL12_RAT	3109	GO:0005840:cellular_component:ribosome	GO:0003723:molecular_function:RNA binding	GO:0003735:molecular_function:structural constituent of ribosome	GO:0006412:biological_process:translation
Locus_17188.0|BlastHit|gi|132653|sp|P23358.1|RL12_RAT	3110	GO:0005840:cellular_component:ribosome	GO:0003723:molecular_function:RNA binding	GO:0003735:molecular_function:structural constituent of ribosome	GO:0006412:biological_process:translation
Locus_17224.0|BlastHit|gi|3023703|sp|P56252.1|ENO_HOMGA	3132	GO:0000015:cellular_component:phosphopyruvate hydratase complex	GO:0000287:molecular_function:magnesium ion binding	GO:0004634:molecular_function:phosphopyruvate hydratase activity	GO:0006096:biological_process:glycolytic process
Locus_17256.0|BlastHit|gi|73920250|sp|P61759.2|PFD3_MOUSE	3151	GO:0005737:cellular_component:cytoplasm	GO:0005634:cellular_component:nucleus	GO:0016272:cellular_component:prefoldin complex	GO:0006457:biological_process:protein folding
Locus_17258.0|BlastHit|gi|12644468|sp|Q94514.2|COX5A_DROME	3153	GO:0005811:cellular_component:lipid particle	GO:0005743:cellular_component:mitochondrial inner membrane	GO:0005739:cellular_component:mitochondrion	GO:0004129:molecular_function:cytochrome-c oxidase activity	GO:0046872:molecular_function:metal ion binding	GO:0045787:biological_process:positive regulation of cell cycle
Locus_17270.0|BlastHit|gi|34582476|sp|Q9CQC9.1|SAR1B_MOUSE	3155	GO:0005789:cellular_component:endoplasmic reticulum membrane	GO:0032580:cellular_component:Golgi cisterna membrane	GO:0005525:molecular_function:GTP binding	GO:0046872:molecular_function:metal ion binding	GO:0006886:biological_process:intracellular protein transport	GO:0016192:biological_process:vesicle-mediated transport
Locus_17273.0|BlastHit|gi|13124294|sp|Q9UJM8.1|HAOX1_HUMAN	3157	GO:0005782:cellular_component:peroxisomal matrix	GO:0005777:cellular_component:peroxisome	GO:0003973:molecular_function:(S)-2-hydroxy-acid oxidase activity	GO:0010181:molecular_function:FMN binding	GO:0008891:molecular_function:glycolate oxidase activity	GO:0047969:molecular_function:glyoxylate oxidase activity	GO:0052853:molecular_function:long-chain-(S)-2-hydroxy-long-chain-acid oxidase activity	GO:0052854:molecular_function:medium-chain-(S)-2-hydroxy-acid oxidase activity	GO:0005102:molecular_function:receptor binding	GO:0052852:molecular_function:very-long-chain-(S)-2-hydroxy-acid oxidase activity	GO:0034641:biological_process:cellular nitrogen compound metabolic process	GO:0001561:biological_process:fatty acid alpha-oxidation	GO:0046296:biological_process:glycolate catabolic process	GO:0046487:biological_process:glyoxylate metabolic process	GO:0006979:biological_process:response to oxidative stress	GO:0044281:biological_process:small molecule metabolic process
Locus_17320.0|BlastHit|gi|122145286|sp|Q0IIF2.1|EI2BA_BOVIN	3166	GO:0005737:cellular_component:cytoplasm	GO:0005851:cellular_component:eukaryotic translation initiation factor 2B complex	GO:0005886:cellular_component:plasma membrane	GO:0005085:molecular_function:guanyl-nucleotide exchange factor activity	GO:0003743:molecular_function:translation initiation factor activity	GO:0051716:biological_process:cellular response to stimulus	GO:0014003:biological_process:oligodendrocyte development	GO:0006446:biological_process:regulation of translational initiation
Locus_17331.0|BlastHit|gi|231502|sp|P30170.1|ACT10_SOLTU	3167	GO:0005737:cellular_component:cytoplasm	GO:0005856:cellular_component:cytoskeleton	GO:0005524:molecular_function:ATP binding
Locus_17351.0|BlastHit|gi|82187655|sp|Q7SXS2.1|YIPF5_XENLA	3170	GO:0005789:cellular_component:endoplasmic reticulum membrane	GO:0030134:cellular_component:ER to Golgi transport vesicle	GO:0032580:cellular_component:Golgi cisterna membrane	GO:0016021:cellular_component:integral component of membrane	GO:0015031:biological_process:protein transport	GO:0016192:biological_process:vesicle-mediated transport
Locus_17361.0|BlastHit|gi|122138726|sp|Q32L83.1|BRI3_BOVIN	3173	GO:0016021:cellular_component:integral component of membrane
Locus_17386.0|BlastHit|gi|20139649|sp|Q99N92.1|RM27_MOUSE	3183	GO:0005739:cellular_component:mitochondrion	GO:0005840:cellular_component:ribosome	GO:0044822:molecular_function:poly(A) RNA binding	GO:0003735:molecular_function:structural constituent of ribosome	GO:0006412:biological_process:translation
Locus_17399.0|BlastHit|gi|82181462|sp|Q66KC4.1|HSDL2_XENTR	3199	GO:0005634:cellular_component:nucleus	GO:0003700:molecular_function:sequence-specific DNA binding transcription factor activity	GO:0048511:biological_process:rhythmic process	GO:0006351:biological_process:transcription, DNA-templated
Locus_17399.0|BlastHit|gi|82181462|sp|Q66KC4.1|HSDL2_XENTR	3199	GO:0005777:cellular_component:peroxisome	GO:0016491:molecular_function:oxidoreductase activity
Locus_17403.0|BlastHit|gi|462690|sp|Q05982.1|NDKA_RAT	3202	GO:0005853:cellular_component:eukaryotic translation elongation factor 1 complex	GO:0003746:molecular_function:translation elongation factor activity
Locus_17403.0|BlastHit|gi|462690|sp|Q05982.1|NDKA_RAT	3202	GO:0071944:cellular_component:cell periphery	GO:0005813:cellular_component:centrosome	GO:0005829:cellular_component:cytosol	GO:0070062:cellular_component:extracellular vesicular exosome	GO:0030027:cellular_component:lamellipodium	GO:0016020:cellular_component:membrane	GO:0005634:cellular_component:nucleus	GO:0048471:cellular_component:perinuclear region of cytoplasm	GO:0001726:cellular_component:ruffle	GO:0005524:molecular_function:ATP binding	GO:0019899:molecular_function:enzyme binding	GO:0043015:molecular_function:gamma-tubulin binding	GO:0019215:molecular_function:intermediate filament binding	GO:0046872:molecular_function:metal ion binding	GO:0004550:molecular_function:nucleoside diphosphate kinase activity	GO:0019901:molecular_function:protein kinase binding	GO:0000977:molecular_function:RNA polymerase II regulatory region sequence-specific DNA binding	GO:0003697:molecular_function:single-stranded DNA binding	GO:0035690:biological_process:cellular response to drug	GO:0071398:biological_process:cellular response to fatty acid	GO:0071333:biological_process:cellular response to glucose stimulus	GO:0006241:biological_process:CTP biosynthetic process	GO:0006897:biological_process:endocytosis	GO:0006183:biological_process:GTP biosynthetic process	GO:0021766:biological_process:hippocampus development	GO:0007229:biological_process:integrin-mediated signaling pathway	GO:0043066:biological_process:negative regulation of apoptotic process	GO:0010629:biological_process:negative regulation of gene expression	GO:0002762:biological_process:negative regulation of myeloid leukocyte differentiation	GO:0006165:biological_process:nucleoside diphosphate phosphorylation	GO:0050679:biological_process:positive regulation of epithelial cell proliferation	GO:0045618:biological_process:positive regulation of keratinocyte differentiation
Locus_17406.0|BlastHit|gi|29427664|sp|P91918.1|RSMB_CAEEL	3204	GO:0015030:cellular_component:Cajal body	GO:0071013:cellular_component:catalytic step 2 spliceosome	GO:0005634:cellular_component:nucleus	GO:0045495:cellular_component:pole plasm	GO:0071011:cellular_component:precatalytic spliceosome	GO:0030532:cellular_component:small nuclear ribonucleoprotein complex	GO:0005681:cellular_component:spliceosomal complex	GO:0003723:molecular_function:RNA binding	GO:0007281:biological_process:germ cell development	GO:0008406:biological_process:gonad development	GO:0007052:biological_process:mitotic spindle organization	GO:0000398:biological_process:mRNA splicing, via spliceosome
Locus_17411.0|BlastHit|gi|109894874|sp|Q3T134.1|SPCS1_BOVIN	3208	GO:0016021:cellular_component:integral component of membrane	GO:0005787:cellular_component:signal peptidase complex	GO:0008233:molecular_function:peptidase activity	GO:0006465:biological_process:signal peptide processing
Locus_17643.0|BlastHit|gi|22001886|sp|Q963B6.1|RL10A_SPOFR	3299	GO:0015934:cellular_component:large ribosomal subunit	GO:0003723:molecular_function:RNA binding	GO:0003735:molecular_function:structural constituent of ribosome	GO:0006412:biological_process:translation
Locus_17643.0|BlastHit|gi|22001886|sp|Q963B6.1|RL10A_SPOFR	3300	GO:0015934:cellular_component:large ribosomal subunit	GO:0003723:molecular_function:RNA binding	GO:0003735:molecular_function:structural constituent of ribosome	GO:0006412:biological_process:translation
Locus_17663.0|BlastHit|gi|728796|sp|P41339.1|ACTA_LIMPO	3310	GO:0005737:cellular_component:cytoplasm	GO:0005856:cellular_component:cytoskeleton	GO:0005524:molecular_function:ATP binding
Locus_17807.0|BlastHit|gi|134309|sp|P05946.1|SCP1_PONLE	3350	GO:0005509:molecular_function:calcium ion binding
Locus_18026.0|BlastHit|gi|82179806|sp|Q5RJX8.1|SU41B_XENLA	3413	GO:0005720:cellular_component:nuclear heterochromatin	GO:0005634:cellular_component:nucleus	GO:0005700:cellular_component:polytene chromosome	GO:0042799:molecular_function:histone methyltransferase activity (H4-K20 specific)	GO:0006342:biological_process:chromatin silencing	GO:0034772:biological_process:histone H4-K20 dimethylation	GO:0034770:biological_process:histone H4-K20 methylation	GO:0034773:biological_process:histone H4-K20 trimethylation	GO:0016571:biological_process:histone methylation	GO:0040029:biological_process:regulation of gene expression, epigenetic	GO:0006351:biological_process:transcription, DNA-templated
Locus_18039.0|BlastHit|gi|71648802|sp|Q6TNS2.1|PK1IP_DANRE	3419	GO:0005730:cellular_component:nucleolus	GO:0009968:biological_process:negative regulation of signal transduction
Locus_18077.0|BlastHit|gi|14285503|sp|Q61249.1|IGBP1_MOUSE	3442	GO:0005737:cellular_component:cytoplasm	GO:0019208:molecular_function:phosphatase regulator activity	GO:0042113:biological_process:B cell activation	GO:0050790:biological_process:regulation of catalytic activity	GO:0009966:biological_process:regulation of signal transduction	GO:0007165:biological_process:signal transduction
Locus_18089.0|BlastHit|gi|126378|sp|P14562.1|LAMP1_RAT	3451	GO:0010008:cellular_component:endosome membrane	GO:0016021:cellular_component:integral component of membrane	GO:0005765:cellular_component:lysosomal membrane	GO:0005886:cellular_component:plasma membrane
Locus_18102.0|BlastHit|gi|224493238|sp|A6QPQ5.1|RM01_BOVIN	3460	GO:0015934:cellular_component:large ribosomal subunit	GO:0005739:cellular_component:mitochondrion	GO:0005634:cellular_component:nucleus	GO:0044822:molecular_function:poly(A) RNA binding	GO:0003735:molecular_function:structural constituent of ribosome	GO:0006412:biological_process:translation
Locus_18105.0|BlastHit|gi|2495346|sp|Q91233.1|HSP70_ONCTS	3464	GO:0005524:molecular_function:ATP binding
Locus_18111.0|BlastHit|gi|82194902|sp|Q5F464.1|LPP_CHICK	3467	GO:0005737:cellular_component:cytoplasm	GO:0005925:cellular_component:focal adhesion	GO:0005634:cellular_component:nucleus	GO:0008270:molecular_function:zinc ion binding	GO:0007155:biological_process:cell adhesion
Locus_18124.0|BlastHit|gi|134315|sp|P02635.1|SCPB_PENSP	3473	GO:0005509:molecular_function:calcium ion binding
Locus_18135.0|BlastHit|gi|62900734|sp|Q9D7P6.1|ISCU_MOUSE	3477	GO:0005829:cellular_component:cytosol	GO:0005739:cellular_component:mitochondrion	GO:0005506:molecular_function:iron ion binding	GO:0051536:molecular_function:iron-sulfur cluster binding	GO:0016226:biological_process:iron-sulfur cluster assembly
Locus_18170.0|BlastHit|gi|14286117|sp|Q24251.2|ATP5H_DROME	3488	GO:0005811:cellular_component:lipid particle	GO:0005875:cellular_component:microtubule associated complex	GO:0000276:cellular_component:mitochondrial proton-transporting ATP synthase complex, coupling factor F(o)	GO:0005739:cellular_component:mitochondrion	GO:0015078:molecular_function:hydrogen ion transmembrane transporter activity	GO:0015986:biological_process:ATP synthesis coupled proton transport
Locus_18214.0|BlastHit|gi|41712398|sp|P40798.2|STC_DROME	3505	GO:0005634:cellular_component:nucleus	GO:0003677:molecular_function:DNA binding	GO:0003723:molecular_function:RNA binding	GO:0003700:molecular_function:sequence-specific DNA binding transcription factor activity	GO:0008270:molecular_function:zinc ion binding	GO:0006355:biological_process:regulation of transcription, DNA-templated	GO:0006351:biological_process:transcription, DNA-templated
Locus_18220.0|BlastHit|gi|82233006|sp|Q5U4Y8.1|SEH1_XENTR	3507	GO:0000777:cellular_component:condensed chromosome kinetochore	GO:0031080:cellular_component:nuclear pore outer ring	GO:0051315:biological_process:attachment of mitotic spindle microtubules to kinetochore	GO:0007080:biological_process:mitotic metaphase plate congression	GO:0051028:biological_process:mRNA transport	GO:0006999:biological_process:nuclear pore organization	GO:0015031:biological_process:protein transport
Locus_18259.0|BlastHit|gi|31340450|sp|Q9NB32.1|TCPD_AEDTR	3520	GO:0005737:cellular_component:cytoplasm	GO:0005524:molecular_function:ATP binding	GO:0006457:biological_process:protein folding
Locus_18293.0|BlastHit|gi|2493142|sp|Q26250.1|VATL_NEPNO	3547	GO:0016021:cellular_component:integral component of membrane	GO:0033179:cellular_component:proton-transporting V-type ATPase, V0 domain	GO:0005774:cellular_component:vacuolar membrane	GO:0015078:molecular_function:hydrogen ion transmembrane transporter activity	GO:0015991:biological_process:ATP hydrolysis coupled proton transport
Locus_18297.0|BlastHit|gi|20532410|sp|P46471.5|PRS7_MOUSE	3548	GO:0000932:cellular_component:cytoplasmic mRNA processing body	GO:0016020:cellular_component:membrane	GO:0005634:cellular_component:nucleus	GO:0022624:cellular_component:proteasome accessory complex	GO:0005524:molecular_function:ATP binding	GO:0016887:molecular_function:ATPase activity	GO:0001649:biological_process:osteoblast differentiation	GO:0006511:biological_process:ubiquitin-dependent protein catabolic process
Locus_18299.0|BlastHit|gi|6225541|sp|O77210.1|IF4E_APLCA	3549	GO:0016281:cellular_component:eukaryotic translation initiation factor 4F complex	GO:0005845:cellular_component:mRNA cap binding complex	GO:0043234:cellular_component:protein complex	GO:0003743:molecular_function:translation initiation factor activity	GO:0006417:biological_process:regulation of translation
Locus_18311.0|BlastHit|gi|1169866|sp|P41776.2|GNAI_HOMAM	3559	GO:0005525:molecular_function:GTP binding	GO:0003924:molecular_function:GTPase activity	GO:0046872:molecular_function:metal ion binding	GO:0004871:molecular_function:signal transducer activity	GO:0007188:biological_process:adenylate cyclase-modulating G-protein coupled receptor signaling pathway
Locus_18315.0|BlastHit|gi|82241885|sp|Q803V5.1|LST8_DANRE	3561	GO:0005737:cellular_component:cytoplasm
Locus_18320.0|BlastHit|gi|82185546|sp|Q6NUA7.1|SIL1_XENLA	3562	GO:0005788:cellular_component:endoplasmic reticulum lumen	GO:0005615:cellular_component:extracellular space	GO:0015031:biological_process:protein transport
Locus_18330.0|BlastHit|gi|82182278|sp|Q6DCP6.1|DYM_XENLA	3567	GO:0005737:cellular_component:cytoplasm	GO:0005794:cellular_component:Golgi apparatus	GO:0060348:biological_process:bone development	GO:0007030:biological_process:Golgi organization
Locus_18339.0|BlastHit|gi|122063579|sp|Q7JX57.1|U466_DROME	3571	GO:0016021:cellular_component:integral component of membrane	GO:0005739:cellular_component:mitochondrion	GO:0050829:biological_process:defense response to Gram-negative bacterium	GO:0045089:biological_process:positive regulation of innate immune response
Locus_18344.0|BlastHit|gi|109825284|sp|Q2HJ57.3|COTL1_BOVIN	3573	GO:0005737:cellular_component:cytoplasm	GO:0005856:cellular_component:cytoskeleton	GO:0070062:cellular_component:extracellular vesicular exosome	GO:0031965:cellular_component:nuclear membrane	GO:0050832:biological_process:defense response to fungus
Locus_18378.0|BlastHit|gi|82177974|sp|Q561T9.1|OBRG_DANRE	3586	GO:0010008:cellular_component:endosome membrane	GO:0000139:cellular_component:Golgi membrane	GO:0016021:cellular_component:integral component of membrane
Locus_18395.0|BlastHit|gi|190359059|sp|Q3SZ85.2|PTRD1_BOVIN	3593	GO:0070062:cellular_component:extracellular vesicular exosome	GO:0004045:molecular_function:aminoacyl-tRNA hydrolase activity
Locus_18421.0|BlastHit|gi|12229871|sp|Q9VMW8.2|MPU1_DROME	3606	GO:0016021:cellular_component:integral component of membrane	GO:0006810:biological_process:transport
Locus_18435.0|BlastHit|gi|74780873|sp|Q5TTG1.1|VATA_ANOGA	3612	GO:0033180:cellular_component:proton-transporting V-type ATPase, V1 domain	GO:0005524:molecular_function:ATP binding	GO:0046961:molecular_function:proton-transporting ATPase activity, rotational mechanism	GO:0015991:biological_process:ATP hydrolysis coupled proton transport
Locus_18439.0|BlastHit|gi|122064257|sp|Q0VD01.1|IMP4_BOVIN	3613	GO:0005730:cellular_component:nucleolus	GO:0030529:cellular_component:ribonucleoprotein complex	GO:0006364:biological_process:rRNA processing
Locus_18446.0|BlastHit|gi|85701378|sp|P48612.2|PELO_DROME	3615	GO:0005737:cellular_component:cytoplasm	GO:0005634:cellular_component:nucleus	GO:0004519:molecular_function:endonuclease activity	GO:0046872:molecular_function:metal ion binding	GO:0001745:biological_process:compound eye morphogenesis	GO:0048132:biological_process:female germ-line stem cell asymmetric division	GO:0030718:biological_process:germ-line stem cell maintenance	GO:0007140:biological_process:male meiosis	GO:0007141:biological_process:male meiosis I	GO:0008315:biological_process:meiotic G2/MI transition	GO:0007126:biological_process:meiotic nuclear division	GO:0051078:biological_process:meiotic nuclear envelope disassembly	GO:0000212:biological_process:meiotic spindle organization	GO:0007067:biological_process:mitotic nuclear division	GO:0070966:biological_process:nuclear-transcribed mRNA catabolic process, no-go decay	GO:0070481:biological_process:nuclear-transcribed mRNA catabolic process, non-stop decay	GO:0071025:biological_process:RNA surveillance	GO:0048137:biological_process:spermatocyte division	GO:0007283:biological_process:spermatogenesis
Locus_18486.0|BlastHit|gi|82183152|sp|Q6DGZ3.1|THOC7_DANRE	3629	GO:0005737:cellular_component:cytoplasm	GO:0016607:cellular_component:nuclear speck	GO:0000445:cellular_component:THO complex part of transcription export complex	GO:0003723:molecular_function:RNA binding	GO:0006397:biological_process:mRNA processing	GO:0051028:biological_process:mRNA transport	GO:0008380:biological_process:RNA splicing
Locus_18497.0|BlastHit|gi|82081744|sp|Q5ZJQ7.1|SSU72_CHICK	3635	GO:0005737:cellular_component:cytoplasm	GO:0005634:cellular_component:nucleus	GO:0008420:molecular_function:CTD phosphatase activity	GO:0070940:biological_process:dephosphorylation of RNA polymerase II C-terminal domain	GO:0006378:biological_process:mRNA polyadenylation
Locus_18500.0|BlastHit|gi|27805425|sp|O35623.1|BET1_MOUSE	3636	GO:0005801:cellular_component:cis-Golgi network	GO:0005789:cellular_component:endoplasmic reticulum membrane	GO:0031985:cellular_component:Golgi cisterna	GO:0000139:cellular_component:Golgi membrane	GO:0016021:cellular_component:integral component of membrane	GO:0006888:biological_process:ER to Golgi vesicle-mediated transport	GO:0015031:biological_process:protein transport	GO:0048280:biological_process:vesicle fusion with Golgi apparatus	GO:0016192:biological_process:vesicle-mediated transport
Locus_18525.0|BlastHit|gi|158512836|sp|A2VE52.1|ORN_BOVIN	3645	GO:0005925:cellular_component:focal adhesion	GO:0005758:cellular_component:mitochondrial intermembrane space	GO:0005759:cellular_component:mitochondrial matrix	GO:0005730:cellular_component:nucleolus	GO:0008408:molecular_function:3'-5' exonuclease activity	GO:0003676:molecular_function:nucleic acid binding
Locus_18544.0|BlastHit|gi|12585215|sp|Q9V3A4.1|CSUP_DROME	3655	GO:0030424:cellular_component:axon	GO:0016021:cellular_component:integral component of membrane	GO:0005622:cellular_component:intracellular	GO:0043025:cellular_component:neuronal cell body	GO:0097038:cellular_component:perinuclear endoplasmic reticulum	GO:0045202:cellular_component:synapse	GO:0008021:cellular_component:synaptic vesicle	GO:0030234:molecular_function:enzyme regulator activity	GO:0046873:molecular_function:metal ion transmembrane transporter activity	GO:0007298:biological_process:border follicle cell migration	GO:0007300:biological_process:ovarian nurse cell to oocyte transport	GO:0050790:biological_process:regulation of catalytic activity	GO:0042069:biological_process:regulation of catecholamine metabolic process	GO:2000274:biological_process:regulation of epithelial cell migration, open tracheal system
Locus_18556.0|BlastHit|gi|12644106|sp|P08155.2|KRUH_DROME	3660	GO:0005634:cellular_component:nucleus	GO:0003677:molecular_function:DNA binding	GO:0046872:molecular_function:metal ion binding	GO:0003700:molecular_function:sequence-specific DNA binding transcription factor activity	GO:0007552:biological_process:metamorphosis	GO:0045316:biological_process:negative regulation of compound eye photoreceptor development	GO:0010977:biological_process:negative regulation of neuron projection development	GO:0006355:biological_process:regulation of transcription, DNA-templated	GO:0035075:biological_process:response to ecdysone
Locus_18605.0|BlastHit|gi|74868451|sp|Q9VD92.1|ARCH_DROME	3675	GO:0046872:molecular_function:metal ion binding	GO:0022008:biological_process:neurogenesis	GO:0008033:biological_process:tRNA processing
Locus_18657.0|BlastHit|gi|172046620|sp|Q32ZL2.2|LPPR5_HUMAN	3698	GO:0016021:cellular_component:integral component of membrane	GO:0016787:molecular_function:hydrolase activity
Locus_18659.0|BlastHit|gi|20138031|sp|Q9NPF5.1|DMAP1_HUMAN	3699	GO:0005737:cellular_component:cytoplasm	GO:0035267:cellular_component:NuA4 histone acetyltransferase complex	GO:0005654:cellular_component:nucleoplasm	GO:0005634:cellular_component:nucleus	GO:0005657:cellular_component:replication fork	GO:0003682:molecular_function:chromatin binding	GO:0001103:molecular_function:RNA polymerase II repressing transcription factor binding	GO:0003714:molecular_function:transcription corepressor activity	GO:0006325:biological_process:chromatin organization	GO:0006338:biological_process:chromatin remodeling	GO:0006306:biological_process:DNA methylation	GO:0006281:biological_process:DNA repair	GO:0043968:biological_process:histone H2A acetylation	GO:0043967:biological_process:histone H4 acetylation	GO:0000122:biological_process:negative regulation of transcription from RNA polymerase II promoter	GO:0045892:biological_process:negative regulation of transcription, DNA-templated	GO:0042993:biological_process:positive regulation of transcription factor import into nucleus	GO:0040008:biological_process:regulation of growth	GO:0006351:biological_process:transcription, DNA-templated
Locus_18676.0|BlastHit|gi|464524|sp|Q05974.1|RAB1A_LYMST	3705	GO:0005783:cellular_component:endoplasmic reticulum	GO:0005794:cellular_component:Golgi apparatus	GO:0005525:molecular_function:GTP binding	GO:0015031:biological_process:protein transport	GO:0007264:biological_process:small GTPase mediated signal transduction	GO:0016192:biological_process:vesicle-mediated transport
Locus_18676.0|BlastHit|gi|464524|sp|Q05974.1|RAB1A_LYMST	3706	GO:0005783:cellular_component:endoplasmic reticulum	GO:0005794:cellular_component:Golgi apparatus	GO:0005525:molecular_function:GTP binding	GO:0015031:biological_process:protein transport	GO:0007264:biological_process:small GTPase mediated signal transduction	GO:0016192:biological_process:vesicle-mediated transport
Locus_18681.0|BlastHit|gi|62900636|sp|Q8BZ09.1|ODC_MOUSE	3708	GO:0016021:cellular_component:integral component of membrane	GO:0005743:cellular_component:mitochondrial inner membrane	GO:0005739:cellular_component:mitochondrion	GO:0006810:biological_process:transport
Locus_18703.0|BlastHit|gi|82184729|sp|Q6GR45.1|IF6_XENLA	3715	GO:0005737:cellular_component:cytoplasm	GO:0070062:cellular_component:extracellular vesicular exosome	GO:0005882:cellular_component:intermediate filament	GO:0005638:cellular_component:lamin filament	GO:0005730:cellular_component:nucleolus	GO:0043023:molecular_function:ribosomal large subunit binding	GO:0043022:molecular_function:ribosome binding	GO:0003743:molecular_function:translation initiation factor activity	GO:0042256:biological_process:mature ribosome assembly	GO:0042273:biological_process:ribosomal large subunit biogenesis	GO:0000054:biological_process:ribosomal subunit export from nucleus
Locus_18705.0|BlastHit|gi|82228615|sp|Q4VBT1.1|FA1B1_DANRE	3716	GO:0005737:cellular_component:cytoplasm	GO:0005504:molecular_function:fatty acid binding	GO:0005215:molecular_function:transporter activity
Locus_18720.0|BlastHit|gi|74676478|sp|Q08742.1|RDL2_YEAST	3722	GO:0005739:cellular_component:mitochondrion	GO:0004792:molecular_function:thiosulfate sulfurtransferase activity	GO:0008152:biological_process:metabolic process
Locus_18749.0|BlastHit|gi|12644118|sp|P11387.2|TOP1_HUMAN	3732	GO:0005694:cellular_component:chromosome	GO:0005634:cellular_component:nucleus	GO:0001046:molecular_function:core promoter sequence-specific DNA binding	GO:0003917:molecular_function:DNA topoisomerase type I activity	GO:0003918:molecular_function:DNA topoisomerase type II (ATP-hydrolyzing) activity	GO:0006338:biological_process:chromatin remodeling	GO:0032922:biological_process:circadian regulation of gene expression	GO:0006265:biological_process:DNA topological change
Locus_18770.0|BlastHit|gi|81884505|sp|Q6AY04.1|CB047_RAT	3738	GO:0005739:cellular_component:mitochondrion
Locus_18779.0|BlastHit|gi|5902701|sp|O60232.1|SSA27_HUMAN	3744	GO:0007067:biological_process:mitotic nuclear division
Locus_18876.0|BlastHit|gi|73921717|sp|Q67FQ3.1|ARHB_XENLA	3788	GO:0005737:cellular_component:cytoplasm	GO:0008203:biological_process:cholesterol metabolic process	GO:0006897:biological_process:endocytosis
Locus_18908.0|BlastHit|gi|166215094|sp|Q7PPA5.5|ATC1_ANOGA	3798	GO:0016021:cellular_component:integral component of membrane	GO:0033017:cellular_component:sarcoplasmic reticulum membrane	GO:0005524:molecular_function:ATP binding	GO:0005388:molecular_function:calcium-transporting ATPase activity	GO:0046872:molecular_function:metal ion binding
Locus_19105.0|BlastHit|gi|374095459|sp|Q96AJ9.2|VTI1A_HUMAN	3862	GO:0030136:cellular_component:clathrin-coated vesicle	GO:0005768:cellular_component:endosome	GO:0005794:cellular_component:Golgi apparatus	GO:0000139:cellular_component:Golgi membrane	GO:0016021:cellular_component:integral component of membrane	GO:0044306:cellular_component:neuron projection terminus	GO:0043025:cellular_component:neuronal cell body	GO:0048471:cellular_component:perinuclear region of cytoplasm	GO:0031201:cellular_component:SNARE complex	GO:0008021:cellular_component:synaptic vesicle	GO:0005484:molecular_function:SNAP receptor activity	GO:0006888:biological_process:ER to Golgi vesicle-mediated transport	GO:0006886:biological_process:intracellular protein transport	GO:0042147:biological_process:retrograde transport, endosome to Golgi	GO:0048280:biological_process:vesicle fusion with Golgi apparatus	GO:0050882:biological_process:voluntary musculoskeletal movement
Locus_19396.0|BlastHit|gi|27734404|sp|Q9CQN6.1|TM14C_MOUSE	3955	GO:0016021:cellular_component:integral component of membrane	GO:0005743:cellular_component:mitochondrial inner membrane	GO:0005739:cellular_component:mitochondrion	GO:0030218:biological_process:erythrocyte differentiation	GO:0006783:biological_process:heme biosynthetic process	GO:0006839:biological_process:mitochondrial transport	GO:0070453:biological_process:regulation of heme biosynthetic process
Locus_19481.0|BlastHit|gi|74742178|sp|Q5JTJ3.1|CA031_HUMAN	3996	GO:0005739:cellular_component:mitochondrion	GO:0004129:molecular_function:cytochrome-c oxidase activity	GO:0044822:molecular_function:poly(A) RNA binding
Locus_19547.0|BlastHit|gi|68565629|sp|Q566C7.1|NUDT3_RAT	4023	GO:0005737:cellular_component:cytoplasm	GO:0070062:cellular_component:extracellular vesicular exosome	GO:0008486:molecular_function:diphosphoinositol-polyphosphate diphosphatase activity	GO:0052840:molecular_function:inositol diphosphate tetrakisphosphate diphosphatase activity	GO:0052846:molecular_function:inositol-1,5-bisdiphosphate-2,3,4,6-tetrakisphosphate 1-diphosphatase activity	GO:0052847:molecular_function:inositol-1,5-bisdiphosphate-2,3,4,6-tetrakisphosphate 5-diphosphatase activity	GO:0052843:molecular_function:inositol-1-diphosphate-2,3,4,5,6-pentakisphosphate diphosphatase activity	GO:0052848:molecular_function:inositol-3,5-bisdiphosphate-2,3,4,6-tetrakisphosphate 5-diphosphatase activity	GO:0052844:molecular_function:inositol-3-diphosphate-1,2,4,5,6-pentakisphosphate diphosphatase activity	GO:0052845:molecular_function:inositol-5-diphosphate-1,2,3,4,6-pentakisphosphate diphosphatase activity	GO:0000287:molecular_function:magnesium ion binding	GO:0071544:biological_process:diphosphoinositol polyphosphate catabolic process
Locus_19555.0|BlastHit|gi|205371761|sp|P23588.2|IF4B_HUMAN	4032	GO:0005829:cellular_component:cytosol	GO:0016281:cellular_component:eukaryotic translation initiation factor 4F complex	GO:0000166:molecular_function:nucleotide binding	GO:0044822:molecular_function:poly(A) RNA binding	GO:0003723:molecular_function:RNA binding	GO:0003743:molecular_function:translation initiation factor activity	GO:0044267:biological_process:cellular protein metabolic process	GO:0010467:biological_process:gene expression	GO:0008286:biological_process:insulin receptor signaling pathway	GO:0016071:biological_process:mRNA metabolic process	GO:0000288:biological_process:nuclear-transcribed mRNA catabolic process, deadenylation-dependent decay	GO:0000289:biological_process:nuclear-transcribed mRNA poly(A) tail shortening	GO:0006446:biological_process:regulation of translational initiation	GO:0016070:biological_process:RNA metabolic process	GO:0006412:biological_process:translation	GO:0006413:biological_process:translational initiation
Locus_19576.0|BlastHit|gi|130353|sp|P15259.3|PGAM2_HUMAN	4037	GO:0005829:cellular_component:cytosol	GO:0070062:cellular_component:extracellular vesicular exosome	GO:0005634:cellular_component:nucleus	GO:0046538:molecular_function:2,3-bisphosphoglycerate-dependent phosphoglycerate mutase activity	GO:0004083:molecular_function:bisphosphoglycerate 2-phosphatase activity	GO:0004082:molecular_function:bisphosphoglycerate mutase activity	GO:0048037:molecular_function:cofactor binding	GO:0004619:molecular_function:phosphoglycerate mutase activity	GO:0005975:biological_process:carbohydrate metabolic process	GO:0006094:biological_process:gluconeogenesis	GO:0006006:biological_process:glucose metabolic process	GO:0006096:biological_process:glycolytic process	GO:0046689:biological_process:response to mercury ion	GO:0044281:biological_process:small molecule metabolic process	GO:0007283:biological_process:spermatogenesis	GO:0006941:biological_process:striated muscle contraction
Locus_19605.0|BlastHit|gi|122415385|sp|Q1QBB9.1|DHMA_PSYCK	4060	GO:0018786:molecular_function:haloalkane dehalogenase activity
Locus_19609.0|BlastHit|gi|75061972|sp|Q5RDL2.1|DDX24_PONAB	4061	GO:0016020:cellular_component:membrane	GO:0005730:cellular_component:nucleolus	GO:0005524:molecular_function:ATP binding	GO:0008026:molecular_function:ATP-dependent helicase activity	GO:0044822:molecular_function:poly(A) RNA binding	GO:0003724:molecular_function:RNA helicase activity	GO:0016070:biological_process:RNA metabolic process
Locus_19612.0|BlastHit|gi|74948247|sp|Q9VMY1.1|RM24_DROME	4063	GO:0005762:cellular_component:mitochondrial large ribosomal subunit	GO:0003735:molecular_function:structural constituent of ribosome	GO:0006412:biological_process:translation
Locus_19655.0|BlastHit|gi|122106389|sp|Q17BB0.1|WDR12_AEDAE	4078	GO:0005654:cellular_component:nucleoplasm	GO:0070545:cellular_component:PeBoW complex	GO:0030687:cellular_component:preribosome, large subunit precursor	GO:0043021:molecular_function:ribonucleoprotein complex binding	GO:0000466:biological_process:maturation of 5.8S rRNA from tricistronic rRNA transcript (SSU-rRNA, 5.8S rRNA, LSU-rRNA)	GO:0000463:biological_process:maturation of LSU-rRNA from tricistronic rRNA transcript (SSU-rRNA, 5.8S rRNA, LSU-rRNA)
Locus_19665.0|BlastHit|gi|31076619|sp|Q8UWA5.3|CAH2_TRIHK	4080	GO:0045177:cellular_component:apical part of cell	GO:0030424:cellular_component:axon	GO:0016323:cellular_component:basolateral plasma membrane	GO:0005737:cellular_component:cytoplasm	GO:0005829:cellular_component:cytosol	GO:0005615:cellular_component:extracellular space	GO:0070062:cellular_component:extracellular vesicular exosome	GO:0005902:cellular_component:microvillus	GO:0043209:cellular_component:myelin sheath	GO:0005886:cellular_component:plasma membrane	GO:0004089:molecular_function:carbonate dehydratase activity	GO:0008270:molecular_function:zinc ion binding	GO:0038166:biological_process:angiotensin-activated signaling pathway	GO:0015701:biological_process:bicarbonate transport	GO:0071498:biological_process:cellular response to fluid shear stress	GO:0001822:biological_process:kidney development	GO:0002009:biological_process:morphogenesis of an epithelium	GO:0042475:biological_process:odontogenesis of dentin-containing tooth	GO:0006730:biological_process:one-carbon metabolic process	GO:0045780:biological_process:positive regulation of bone resorption	GO:0032849:biological_process:positive regulation of cellular pH reduction	GO:2001150:biological_process:positive regulation of dipeptide transmembrane transport	GO:0045672:biological_process:positive regulation of osteoclast differentiation	GO:0032230:biological_process:positive regulation of synaptic transmission, GABAergic	GO:0044070:biological_process:regulation of anion transport	GO:2001225:biological_process:regulation of chloride transport	GO:0051453:biological_process:regulation of intracellular pH	GO:0043627:biological_process:response to estrogen	GO:0009268:biological_process:response to pH	GO:0010043:biological_process:response to zinc ion	GO:0046903:biological_process:secretion	GO:0044281:biological_process:small molecule metabolic process
Locus_19668.0|BlastHit|gi|6225644|sp|Q17058.1|MAL1_APIME	4081	GO:0004558:molecular_function:alpha-1,4-glucosidase activity	GO:0043169:molecular_function:cation binding	GO:0032450:molecular_function:maltose alpha-glucosidase activity	GO:0005975:biological_process:carbohydrate metabolic process
Locus_19732.0|BlastHit|gi|115143|sp|P20290.1|BTF3_HUMAN	4106	GO:0005737:cellular_component:cytoplasm	GO:0005634:cellular_component:nucleus	GO:0044822:molecular_function:poly(A) RNA binding	GO:0001701:biological_process:in utero embryonic development	GO:0015031:biological_process:protein transport	GO:0006355:biological_process:regulation of transcription, DNA-templated	GO:0006366:biological_process:transcription from RNA polymerase II promoter
Locus_19739.0|BlastHit|gi|47606749|sp|Q05825.3|ATPB_DROME	4109	GO:0009986:cellular_component:cell surface	GO:0070062:cellular_component:extracellular vesicular exosome	GO:0042645:cellular_component:mitochondrial nucleoid	GO:0005753:cellular_component:mitochondrial proton-transporting ATP synthase complex	GO:0005634:cellular_component:nucleus	GO:0005886:cellular_component:plasma membrane	GO:0045261:cellular_component:proton-transporting ATP synthase complex, catalytic core F(1)	GO:0005524:molecular_function:ATP binding	GO:0046933:molecular_function:proton-transporting ATP synthase activity, rotational mechanism	GO:0046961:molecular_function:proton-transporting ATPase activity, rotational mechanism	GO:0001525:biological_process:angiogenesis	GO:0006200:biological_process:ATP catabolic process	GO:0015991:biological_process:ATP hydrolysis coupled proton transport	GO:0015986:biological_process:ATP synthesis coupled proton transport	GO:0006629:biological_process:lipid metabolic process	GO:0006933:biological_process:negative regulation of cell adhesion involved in substrate-bound cell migration	GO:0001649:biological_process:osteoblast differentiation	GO:0051453:biological_process:regulation of intracellular pH
Locus_19759.0|BlastHit|gi|52783213|sp|Q9CY58.2|PAIRB_MOUSE	4117	GO:0070062:cellular_component:extracellular vesicular exosome	GO:0005634:cellular_component:nucleus	GO:0048471:cellular_component:perinuclear region of cytoplasm	GO:0005886:cellular_component:plasma membrane	GO:0003730:molecular_function:mRNA 3'-UTR binding	GO:0042981:biological_process:regulation of apoptotic process
Locus_19800.0|BlastHit|gi|82197810|sp|Q5ZKE7.1|KCY_CHICK	4130	GO:0005737:cellular_component:cytoplasm	GO:0005634:cellular_component:nucleus	GO:0005524:molecular_function:ATP binding	GO:0004127:molecular_function:cytidylate kinase activity	GO:0004550:molecular_function:nucleoside diphosphate kinase activity	GO:0009041:molecular_function:uridylate kinase activity	GO:0006165:biological_process:nucleoside diphosphate phosphorylation	GO:0009142:biological_process:nucleoside triphosphate biosynthetic process	GO:0006221:biological_process:pyrimidine nucleotide biosynthetic process
Locus_19834.0|BlastHit|gi|417042|sp|P28337.2|GCST_CHICK	4140	GO:0005739:cellular_component:mitochondrion	GO:0004047:molecular_function:aminomethyltransferase activity	GO:0008483:molecular_function:transaminase activity	GO:0006546:biological_process:glycine catabolic process
Locus_19861.0|BlastHit|gi|82237247|sp|Q6NVS5.1|DCA13_XENTR	4155	GO:0080008:cellular_component:Cul4-RING E3 ubiquitin ligase complex	GO:0005730:cellular_component:nucleolus	GO:0030529:cellular_component:ribonucleoprotein complex	GO:0016567:biological_process:protein ubiquitination	GO:0006364:biological_process:rRNA processing
Locus_19867.0|BlastHit|gi|130751|sp|P08289.2|PPBT_RAT	4158	GO:0031225:cellular_component:anchored component of membrane	GO:0031012:cellular_component:extracellular matrix	GO:0005615:cellular_component:extracellular space	GO:0070062:cellular_component:extracellular vesicular exosome	GO:0005886:cellular_component:plasma membrane	GO:0004035:molecular_function:alkaline phosphatase activity	GO:0046872:molecular_function:metal ion binding	GO:0016462:molecular_function:pyrophosphatase activity	GO:0071407:biological_process:cellular response to organic cyclic compound	GO:0071529:biological_process:cementum mineralization	GO:0016311:biological_process:dephosphorylation	GO:0003006:biological_process:developmental process involved in reproduction	GO:0001958:biological_process:endochondral ossification	GO:0001649:biological_process:osteoblast differentiation	GO:0046677:biological_process:response to antibiotic	GO:0051384:biological_process:response to glucocorticoid	GO:0032496:biological_process:response to lipopolysaccharide	GO:0033280:biological_process:response to vitamin D
Locus_19881.0|BlastHit|gi|82187641|sp|Q7SXP0.1|S22BB_DANRE	4161	GO:0005789:cellular_component:endoplasmic reticulum membrane	GO:0033116:cellular_component:endoplasmic reticulum-Golgi intermediate compartment membrane	GO:0000139:cellular_component:Golgi membrane	GO:0016021:cellular_component:integral component of membrane	GO:0015031:biological_process:protein transport	GO:0016192:biological_process:vesicle-mediated transport
Locus_19896.0|BlastHit|gi|190479826|sp|A6QQJ8.1|ZC12A_BOVIN	4168	GO:0004519:molecular_function:endonuclease activity	GO:0046872:molecular_function:metal ion binding
Locus_19963.0|BlastHit|gi|83305931|sp|Q8K4K3.2|TRIB2_MOUSE	4199	GO:0005737:cellular_component:cytoplasm	GO:0005856:cellular_component:cytoskeleton	GO:0004860:molecular_function:protein kinase inhibitor activity	GO:0008134:molecular_function:transcription factor binding	GO:0016772:molecular_function:transferase activity, transferring phosphorus-containing groups	GO:0031625:molecular_function:ubiquitin protein ligase binding	GO:0055106:molecular_function:ubiquitin-protein transferase regulator activity	GO:0045599:biological_process:negative regulation of fat cell differentiation	GO:0045081:biological_process:negative regulation of interleukin-10 biosynthetic process	GO:0043433:biological_process:negative regulation of sequence-specific DNA binding transcription factor activity	GO:0032436:biological_process:positive regulation of proteasomal ubiquitin-dependent protein catabolic process	GO:0051443:biological_process:positive regulation of ubiquitin-protein transferase activity	GO:0043405:biological_process:regulation of MAP kinase activity
Locus_19994.0|BlastHit|gi|13633250|sp|Q9QUR6.1|PPCE_MOUSE	4213	GO:0005737:cellular_component:cytoplasm	GO:0016020:cellular_component:membrane	GO:0005634:cellular_component:nucleus	GO:0004252:molecular_function:serine-type endopeptidase activity	GO:0070008:molecular_function:serine-type exopeptidase activity	GO:0019538:biological_process:protein metabolic process
Locus_20007.0|BlastHit|gi|46576615|sp|Q8TDD1.2|DDX54_HUMAN	4218	GO:0016020:cellular_component:membrane	GO:0005730:cellular_component:nucleolus	GO:0005634:cellular_component:nucleus	GO:0005524:molecular_function:ATP binding	GO:0004004:molecular_function:ATP-dependent RNA helicase activity	GO:0030331:molecular_function:estrogen receptor binding	GO:0044822:molecular_function:poly(A) RNA binding	GO:0005102:molecular_function:receptor binding	GO:0003714:molecular_function:transcription corepressor activity	GO:0006200:biological_process:ATP catabolic process	GO:0030520:biological_process:intracellular estrogen receptor signaling pathway	GO:1903507:biological_process:negative regulation of nucleic acid-templated transcription	GO:0006355:biological_process:regulation of transcription, DNA-templated	GO:0016070:biological_process:RNA metabolic process	GO:0006396:biological_process:RNA processing	GO:0006351:biological_process:transcription, DNA-templated
Locus_20011.0|BlastHit|gi|119361072|sp|Q08D64.1|ABCB6_XENTR	4219	GO:0005783:cellular_component:endoplasmic reticulum	GO:0005794:cellular_component:Golgi apparatus	GO:0016021:cellular_component:integral component of membrane	GO:0005741:cellular_component:mitochondrial outer membrane	GO:0005886:cellular_component:plasma membrane	GO:0005524:molecular_function:ATP binding	GO:0042626:molecular_function:ATPase activity, coupled to transmembrane movement of substances
Locus_20013.0|BlastHit|gi|81917202|sp|Q9DC22.1|DCAF6_MOUSE	4220	GO:0080008:cellular_component:Cul4-RING E3 ubiquitin ligase complex	GO:0005634:cellular_component:nucleus	GO:0030374:molecular_function:ligand-dependent nuclear receptor transcription coactivator activity	GO:0045944:biological_process:positive regulation of transcription from RNA polymerase II promoter	GO:0016567:biological_process:protein ubiquitination
Locus_20057.0|BlastHit|gi|296439776|sp|B3P6T8.1|TMEDA_DROER	4237	GO:0016021:cellular_component:integral component of membrane	GO:0009953:biological_process:dorsal/ventral pattern formation	GO:0006810:biological_process:transport
Locus_20087.0|BlastHit|gi|251764999|sp|A7RLE5.1|RCL_NEMVE	4246	GO:0005737:cellular_component:cytoplasm	GO:0005634:cellular_component:nucleus	GO:0070694:molecular_function:deoxyribonucleoside 5'-monophosphate N-glycosidase activity	GO:0050144:molecular_function:nucleoside deoxyribosyltransferase activity	GO:0009159:biological_process:deoxyribonucleoside monophosphate catabolic process	GO:0009116:biological_process:nucleoside metabolic process	GO:0009117:biological_process:nucleotide metabolic process	GO:0030307:biological_process:positive regulation of cell growth
Locus_20092.0|BlastHit|gi|68053022|sp|Q5E951.1|TBCB_BOVIN	4248	GO:0005829:cellular_component:cytosol	GO:0005874:cellular_component:microtubule	GO:0005634:cellular_component:nucleus	GO:0030154:biological_process:cell differentiation	GO:0007399:biological_process:nervous system development	GO:0007023:biological_process:post-chaperonin tubulin folding pathway
Locus_20123.0|BlastHit|gi|17380352|sp|P13060.4|EF2_DROME	4257	GO:0005829:cellular_component:cytosol	GO:0005811:cellular_component:lipid particle	GO:0005875:cellular_component:microtubule associated complex	GO:0005525:molecular_function:GTP binding	GO:0003924:molecular_function:GTPase activity	GO:0003746:molecular_function:translation elongation factor activity	GO:0000022:biological_process:mitotic spindle elongation	GO:0007052:biological_process:mitotic spindle organization	GO:0006414:biological_process:translational elongation
Locus_20130.0|BlastHit|gi|341941133|sp|Q61029.4|LAP2B_MOUSE	4261	GO:0000785:cellular_component:chromatin	GO:0016021:cellular_component:integral component of membrane	GO:0005635:cellular_component:nuclear envelope	GO:0005637:cellular_component:nuclear inner membrane	GO:0005634:cellular_component:nucleus	GO:0003677:molecular_function:DNA binding	GO:0006355:biological_process:regulation of transcription, DNA-templated
Locus_20133.0|BlastHit|gi|74871274|sp|Q9VW12.1|U389_DROME	4262	GO:0016021:cellular_component:integral component of membrane
Locus_20157.0|BlastHit|gi|11134791|sp|Q9VC49.1|RPAB5_DROME	4274	GO:0005736:cellular_component:DNA-directed RNA polymerase I complex	GO:0005665:cellular_component:DNA-directed RNA polymerase II, core complex	GO:0005666:cellular_component:DNA-directed RNA polymerase III complex	GO:0003677:molecular_function:DNA binding	GO:0003899:molecular_function:DNA-directed RNA polymerase activity	GO:0008270:molecular_function:zinc ion binding	GO:0006360:biological_process:transcription from RNA polymerase I promoter	GO:0006366:biological_process:transcription from RNA polymerase II promoter	GO:0006383:biological_process:transcription from RNA polymerase III promoter
Locus_20221.0|BlastHit|gi|134890|sp|P21262.2|SRP09_CANFA	4295	GO:0005829:cellular_component:cytosol	GO:0070062:cellular_component:extracellular vesicular exosome	GO:0005785:cellular_component:signal recognition particle receptor complex	GO:0005786:cellular_component:signal recognition particle, endoplasmic reticulum targeting	GO:0008312:molecular_function:7S RNA binding	GO:0003723:molecular_function:RNA binding	GO:0005047:molecular_function:signal recognition particle binding	GO:0044267:biological_process:cellular protein metabolic process	GO:0010467:biological_process:gene expression	GO:0045900:biological_process:negative regulation of translational elongation	GO:0006614:biological_process:SRP-dependent cotranslational protein targeting to membrane	GO:0006412:biological_process:translation
Locus_20246.0|BlastHit|gi|82209800|sp|Q7ZYC4.1|ACBG2_XENLA	4301	GO:0005737:cellular_component:cytoplasm	GO:0005524:molecular_function:ATP binding	GO:0004467:molecular_function:long-chain fatty acid-CoA ligase activity
Locus_20289.0|BlastHit|gi|81875183|sp|Q8BTV1.1|TUSC3_MOUSE	4322	GO:0005789:cellular_component:endoplasmic reticulum membrane	GO:0016021:cellular_component:integral component of membrane	GO:0005886:cellular_component:plasma membrane	GO:0045454:biological_process:cell redox homeostasis	GO:0006810:biological_process:transport
Locus_20343.0|BlastHit|gi|380876913|sp|E1BWM5.1|FUND1_CHICK	4354	GO:0031307:cellular_component:integral component of mitochondrial outer membrane	GO:0000422:biological_process:mitochondrion degradation	GO:0001666:biological_process:response to hypoxia
Locus_20388.0|BlastHit|gi|1709616|sp|P54399.1|PDI_DROME	4380	GO:0060187:cellular_component:cell pole	GO:0005737:cellular_component:cytoplasm	GO:0012505:cellular_component:endomembrane system	GO:0005783:cellular_component:endoplasmic reticulum	GO:0005788:cellular_component:endoplasmic reticulum lumen	GO:0005615:cellular_component:extracellular space	GO:0045169:cellular_component:fusome	GO:0005811:cellular_component:lipid particle	GO:0043025:cellular_component:neuronal cell body	GO:0005635:cellular_component:nuclear envelope	GO:0048471:cellular_component:perinuclear region of cytoplasm	GO:0005791:cellular_component:rough endoplasmic reticulum	GO:0070732:cellular_component:spindle envelope	GO:0003756:molecular_function:protein disulfide isomerase activity	GO:0045454:biological_process:cell redox homeostasis	GO:0019511:biological_process:peptidyl-proline hydroxylation	GO:0006457:biological_process:protein folding	GO:1902175:biological_process:regulation of oxidative stress-induced intrinsic apoptotic signaling pathway	GO:0034976:biological_process:response to endoplasmic reticulum stress
Locus_20504.0|BlastHit|gi|136411|sp|P06872.1|TRY2_CANFA	4427	GO:0005576:cellular_component:extracellular region	GO:0005615:cellular_component:extracellular space	GO:0005509:molecular_function:calcium ion binding	GO:0004252:molecular_function:serine-type endopeptidase activity	GO:0030574:biological_process:collagen catabolic process	GO:0007586:biological_process:digestion	GO:0006508:biological_process:proteolysis	GO:0007584:biological_process:response to nutrient
Locus_20507.0|BlastHit|gi|71153689|sp|Q6QMZ4.3|RL6_CHILA	4428	GO:0005840:cellular_component:ribosome	GO:0003735:molecular_function:structural constituent of ribosome	GO:0006412:biological_process:translation
Locus_20604.0|BlastHit|gi|123892881|sp|Q28FE0.1|CPPED_XENTR	4481	GO:0005737:cellular_component:cytoplasm	GO:0070062:cellular_component:extracellular vesicular exosome	GO:0046872:molecular_function:metal ion binding	GO:0004721:molecular_function:phosphoprotein phosphatase activity
Locus_20611.0|BlastHit|gi|13432136|sp|O75844.2|FACE1_HUMAN	4485	GO:0005789:cellular_component:endoplasmic reticulum membrane	GO:0070062:cellular_component:extracellular vesicular exosome	GO:0016021:cellular_component:integral component of membrane	GO:0016020:cellular_component:membrane	GO:0005637:cellular_component:nuclear inner membrane	GO:0046872:molecular_function:metal ion binding	GO:0004222:molecular_function:metalloendopeptidase activity	GO:0008235:molecular_function:metalloexopeptidase activity	GO:0071586:biological_process:CAAX-box protein processing	GO:0006998:biological_process:nuclear envelope organization	GO:0030327:biological_process:prenylated protein catabolic process	GO:0006508:biological_process:proteolysis
Locus_20636.0|BlastHit|gi|75070059|sp|Q5E9X2.1|MP2K6_BOVIN	4500	GO:0005737:cellular_component:cytoplasm	GO:0005856:cellular_component:cytoskeleton	GO:0005634:cellular_component:nucleus	GO:0005524:molecular_function:ATP binding	GO:0004674:molecular_function:protein serine/threonine kinase activity	GO:0004713:molecular_function:protein tyrosine kinase activity	GO:0000187:biological_process:activation of MAPK activity	GO:0006915:biological_process:apoptotic process	GO:0060048:biological_process:cardiac muscle contraction	GO:0000165:biological_process:MAPK cascade	GO:0006355:biological_process:regulation of transcription, DNA-templated	GO:0006351:biological_process:transcription, DNA-templated
Locus_20637.0|BlastHit|gi|166227173|sp|A7MB12.1|UTP15_BOVIN	4501	GO:0005737:cellular_component:cytoplasm	GO:0005730:cellular_component:nucleolus	GO:0044822:molecular_function:poly(A) RNA binding	GO:0006364:biological_process:rRNA processing
Locus_20638.0|BlastHit|gi|62510603|sp|Q60HG3.1|DLDH_MACFA	4502	GO:0005759:cellular_component:mitochondrial matrix	GO:0004148:molecular_function:dihydrolipoyl dehydrogenase activity	GO:0050660:molecular_function:flavin adenine dinucleotide binding	GO:0045454:biological_process:cell redox homeostasis
Locus_20658.0|BlastHit|gi|12644469|sp|Q94516.2|AT5F1_DROME	4520	GO:0005811:cellular_component:lipid particle	GO:0000276:cellular_component:mitochondrial proton-transporting ATP synthase complex, coupling factor F(o)	GO:0005739:cellular_component:mitochondrion	GO:0015078:molecular_function:hydrogen ion transmembrane transporter activity	GO:0015986:biological_process:ATP synthesis coupled proton transport	GO:0006909:biological_process:phagocytosis
Locus_20709.0|BlastHit|gi|223590178|sp|Q8N1N0.2|CLC4F_HUMAN	4547	GO:0016021:cellular_component:integral component of membrane	GO:0005886:cellular_component:plasma membrane	GO:0005534:molecular_function:galactose binding	GO:0051861:molecular_function:glycolipid binding	GO:0006897:biological_process:endocytosis	GO:0051132:biological_process:NK T cell activation
Locus_20738.0|BlastHit|gi|13633871|sp|O70436.1|SMAD2_RAT	4566	GO:0005737:cellular_component:cytoplasm	GO:0000790:cellular_component:nuclear chromatin	GO:0005637:cellular_component:nuclear inner membrane	GO:0005634:cellular_component:nucleus	GO:0005886:cellular_component:plasma membrane	GO:0043235:cellular_component:receptor complex	GO:0071141:cellular_component:SMAD protein complex	GO:0071144:cellular_component:SMAD2-SMAD3 protein complex	GO:0005667:cellular_component:transcription factor complex	GO:0031490:molecular_function:chromatin DNA binding	GO:0000987:molecular_function:core promoter proximal region sequence-specific DNA binding	GO:0003690:molecular_function:double-stranded DNA binding	GO:0000988:molecular_function:protein binding transcription factor activity	GO:0003700:molecular_function:sequence-specific DNA binding transcription factor activity	GO:0030618:molecular_function:transforming growth factor beta receptor, pathway-specific cytoplasmic mediator activity	GO:0008270:molecular_function:zinc ion binding	GO:0006919:biological_process:activation of cysteine-type endopeptidase activity involved in apoptotic process	GO:0007050:biological_process:cell cycle arrest	GO:0045216:biological_process:cell-cell junction organization	GO:0048589:biological_process:developmental growth	GO:0048701:biological_process:embryonic cranial skeleton morphogenesis	GO:0048617:biological_process:embryonic foregut morphogenesis	GO:0009880:biological_process:embryonic pattern specification	GO:0007492:biological_process:endoderm development	GO:0019049:biological_process:evasion or tolerance of host defenses by virus	GO:0097191:biological_process:extrinsic apoptotic signaling pathway	GO:0001947:biological_process:heart looping	GO:0006955:biological_process:immune response	GO:0002520:biological_process:immune system development	GO:0070306:biological_process:lens fiber cell differentiation	GO:0001889:biological_process:liver development	GO:0001707:biological_process:mesoderm formation
Locus_20750.0|BlastHit|gi|221272033|sp|Q6DH88.2|COX20_DANRE	4571	GO:0016021:cellular_component:integral component of membrane	GO:0031966:cellular_component:mitochondrial membrane
Locus_20762.0|BlastHit|gi|68844471|sp|O76217.2|PE1_ANOGA	4579	GO:0005576:cellular_component:extracellular region	GO:0008061:molecular_function:chitin binding	GO:0006030:biological_process:chitin metabolic process
Locus_20764.1|BlastHit|gi|82194173|sp|Q5BL41.1|ARP2_XENTR	4580	GO:0042995:cellular_component:cell projection	GO:0005737:cellular_component:cytoplasm	GO:0005856:cellular_component:cytoskeleton	GO:0005524:molecular_function:ATP binding
Locus_20766.0|BlastHit|gi|17368331|sp|P82968.1|MCPI_MELCP	4581	GO:0004867:molecular_function:serine-type endopeptidase inhibitor activity
Locus_20766.0|BlastHit|gi|17368331|sp|P82968.1|MCPI_MELCP	4582	GO:0004867:molecular_function:serine-type endopeptidase inhibitor activity
Locus_20791.0|BlastHit|gi|74759034|sp|Q7RTN6.1|STRAA_HUMAN	4592	GO:0005737:cellular_component:cytoplasm	GO:0005634:cellular_component:nucleus	GO:0005524:molecular_function:ATP binding	GO:0030295:molecular_function:protein kinase activator activity	GO:0004674:molecular_function:protein serine/threonine kinase activity	GO:0032147:biological_process:activation of protein kinase activity	GO:0007049:biological_process:cell cycle	GO:0006611:biological_process:protein export from nucleus
Locus_20793.0|BlastHit|gi|300669632|sp|Q6ZS10.2|CL17A_HUMAN	4593	GO:0009986:cellular_component:cell surface	GO:0016021:cellular_component:integral component of membrane	GO:0042806:molecular_function:fucose binding	GO:0005537:molecular_function:mannose binding	GO:0046872:molecular_function:metal ion binding
Locus_20824.0|BlastHit|gi|82081893|sp|Q5ZK10.1|NSF1C_CHICK	4605	GO:0005795:cellular_component:Golgi stack	GO:0005634:cellular_component:nucleus	GO:0008289:molecular_function:lipid binding	GO:0007030:biological_process:Golgi organization	GO:0061025:biological_process:membrane fusion
Locus_20852.0|BlastHit|gi|29428063|sp|Q9VLV5.1|RUXE_DROME	4615	GO:0071013:cellular_component:catalytic step 2 spliceosome	GO:0005634:cellular_component:nucleus	GO:0071011:cellular_component:precatalytic spliceosome	GO:0030532:cellular_component:small nuclear ribonucleoprotein complex	GO:0005681:cellular_component:spliceosomal complex	GO:0003723:molecular_function:RNA binding	GO:0000398:biological_process:mRNA splicing, via spliceosome
Locus_20859.0|BlastHit|gi|123913997|sp|Q08CN9.1|ZNRF2_DANRE	4617	GO:0030054:cellular_component:cell junction	GO:0010008:cellular_component:endosome membrane	GO:0005765:cellular_component:lysosomal membrane	GO:0042734:cellular_component:presynaptic membrane	GO:0016874:molecular_function:ligase activity	GO:0008270:molecular_function:zinc ion binding	GO:0016567:biological_process:protein ubiquitination
Locus_20861.0|BlastHit|gi|12643427|sp|P35134.2|UBC11_ARATH	4618	GO:0016881:molecular_function:acid-amino acid ligase activity	GO:0005524:molecular_function:ATP binding	GO:0004842:molecular_function:ubiquitin-protein transferase activity	GO:0006511:biological_process:ubiquitin-dependent protein catabolic process
Locus_20904.0|BlastHit|gi|308153478|sp|Q9CX56.2|PSMD8_MOUSE	4655	GO:0070062:cellular_component:extracellular vesicular exosome	GO:0005634:cellular_component:nucleus	GO:0022624:cellular_component:proteasome accessory complex	GO:0005838:cellular_component:proteasome regulatory particle	GO:0006508:biological_process:proteolysis
Locus_20910.0|BlastHit|gi|114034|sp|P05090.1|APOD_HUMAN	4663	GO:0022626:cellular_component:cytosolic ribosome	GO:0030425:cellular_component:dendrite	GO:0005783:cellular_component:endoplasmic reticulum	GO:0005576:cellular_component:extracellular region	GO:0005615:cellular_component:extracellular space	GO:0070062:cellular_component:extracellular vesicular exosome	GO:0043025:cellular_component:neuronal cell body	GO:0048471:cellular_component:perinuclear region of cytoplasm	GO:0015485:molecular_function:cholesterol binding	GO:0005319:molecular_function:lipid transporter activity	GO:0007568:biological_process:aging	GO:0001525:biological_process:angiogenesis	GO:0007420:biological_process:brain development	GO:0006006:biological_process:glucose metabolic process	GO:0006629:biological_process:lipid metabolic process	GO:0006869:biological_process:lipid transport	GO:1900016:biological_process:negative regulation of cytokine production involved in inflammatory response	GO:0051895:biological_process:negative regulation of focal adhesion assembly	GO:0060588:biological_process:negative regulation of lipoprotein lipid oxidation	GO:0071638:biological_process:negative regulation of monocyte chemotactic protein-1 production	GO:0010642:biological_process:negative regulation of platelet-derived growth factor receptor signaling pathway	GO:0042308:biological_process:negative regulation of protein import into nucleus	GO:0048662:biological_process:negative regulation of smooth muscle cell proliferation	GO:2000098:biological_process:negative regulation of smooth muscle cell-matrix adhesion	GO:2000405:biological_process:negative regulation of T cell migration	GO:0014012:biological_process:peripheral nervous system axon regeneration	GO:0048678:biological_process:response to axon injury	GO:0042493:biological_process:response to drug	GO:0000302:biological_process:response to reactive oxygen species	GO:0042246:biological_process:tissue regeneration
Locus_20940.0|BlastHit|gi|263406173|sp|B0WEV5.1|ASNA_CULQU	4679	GO:0005783:cellular_component:endoplasmic reticulum	GO:0005524:molecular_function:ATP binding	GO:0016887:molecular_function:ATPase activity	GO:0046872:molecular_function:metal ion binding	GO:0045048:biological_process:protein insertion into ER membrane	GO:0006810:biological_process:transport
Locus_20988.0|BlastHit|gi|3024541|sp|O42184.1|CLIP1_CHICK	4715	GO:0030659:cellular_component:cytoplasmic vesicle membrane	GO:0005874:cellular_component:microtubule	GO:0001726:cellular_component:ruffle	GO:0003676:molecular_function:nucleic acid binding	GO:0008270:molecular_function:zinc ion binding	GO:0006810:biological_process:transport
Locus_20994.0|BlastHit|gi|14917104|sp|Q09660.2|CC44_CAEEL	4719	GO:0005743:cellular_component:mitochondrial inner membrane	GO:0030342:molecular_function:1-alpha,25-dihydroxyvitamin D3 24-hydroxylase activity	GO:0008403:molecular_function:25-hydroxycholecalciferol-24-hydroxylase activity	GO:0020037:molecular_function:heme binding	GO:0005506:molecular_function:iron ion binding	GO:0016491:molecular_function:oxidoreductase activity	GO:0001649:biological_process:osteoblast differentiation	GO:0055114:biological_process:oxidation-reduction process	GO:0033280:biological_process:response to vitamin D	GO:0044281:biological_process:small molecule metabolic process	GO:0008202:biological_process:steroid metabolic process	GO:0042369:biological_process:vitamin D catabolic process	GO:0042359:biological_process:vitamin D metabolic process	GO:0070561:biological_process:vitamin D receptor signaling pathway	GO:0006766:biological_process:vitamin metabolic process	GO:0006805:biological_process:xenobiotic metabolic process
Locus_21025.0|BlastHit|gi|1706258|sp|P54985.1|PPIA_BLAGE	4733	GO:0005737:cellular_component:cytoplasm	GO:0005829:cellular_component:cytosol	GO:0005875:cellular_component:microtubule associated complex	GO:0005634:cellular_component:nucleus	GO:0042277:molecular_function:peptide binding	GO:0003755:molecular_function:peptidyl-prolyl cis-trans isomerase activity	GO:0048102:biological_process:autophagic cell death	GO:0006457:biological_process:protein folding	GO:0035071:biological_process:salivary gland cell autophagic cell death
Locus_21037.0|BlastHit|gi|342187020|sp|Q9R099.2|TBL2_MOUSE	4745	GO:0044822:molecular_function:poly(A) RNA binding
Locus_21047.0|BlastHit|gi|122132362|sp|Q08DT6.1|RM47_BOVIN	4747	GO:0005761:cellular_component:mitochondrial ribosome	GO:0005739:cellular_component:mitochondrion	GO:0003735:molecular_function:structural constituent of ribosome	GO:0006412:biological_process:translation
Locus_21069.0|BlastHit|gi|122119463|sp|Q1HPS0.1|MLR_BOMMO	4762	GO:0016459:cellular_component:myosin complex	GO:0005509:molecular_function:calcium ion binding
Locus_21075.0|BlastHit|gi|74718825|sp|Q9HC07.1|TM165_HUMAN	4764	GO:0031901:cellular_component:early endosome membrane	GO:0010008:cellular_component:endosome membrane	GO:0005794:cellular_component:Golgi apparatus	GO:0000139:cellular_component:Golgi membrane	GO:0016021:cellular_component:integral component of membrane	GO:0043231:cellular_component:intracellular membrane-bounded organelle	GO:0031902:cellular_component:late endosome membrane	GO:0005765:cellular_component:lysosomal membrane	GO:0032588:cellular_component:trans-Golgi network membrane	GO:0006874:biological_process:cellular calcium ion homeostasis	GO:0032472:biological_process:Golgi calcium ion transport	GO:0006487:biological_process:protein N-linked glycosylation	GO:0035751:biological_process:regulation of lysosomal lumen pH
Locus_21094.0|BlastHit|gi|1705999|sp|P53619.1|COPD_BOVIN	4771	GO:0030131:cellular_component:clathrin adaptor complex	GO:0030126:cellular_component:COPI vesicle coat	GO:0005737:cellular_component:cytoplasm	GO:0005829:cellular_component:cytosol	GO:0005783:cellular_component:endoplasmic reticulum	GO:0005794:cellular_component:Golgi apparatus	GO:0043231:cellular_component:intracellular membrane-bounded organelle	GO:0016020:cellular_component:membrane	GO:0044822:molecular_function:poly(A) RNA binding	GO:0008344:biological_process:adult locomotory behavior	GO:0021691:biological_process:cerebellar Purkinje cell layer maturation	GO:0048205:biological_process:COPI coating of Golgi vesicle	GO:0006886:biological_process:intracellular protein transport	GO:0061024:biological_process:membrane organization	GO:0043473:biological_process:pigmentation	GO:0006890:biological_process:retrograde vesicle-mediated transport, Golgi to ER
Locus_21120.0|BlastHit|gi|3913717|sp|O16118.1|GNAS_HOMAM	4790	GO:0005525:molecular_function:GTP binding	GO:0003924:molecular_function:GTPase activity	GO:0046872:molecular_function:metal ion binding	GO:0004871:molecular_function:signal transducer activity	GO:0007186:biological_process:G-protein coupled receptor signaling pathway
Locus_21138.0|BlastHit|gi|73917743|sp|Q6DFS6.1|CHM2A_XENTR	4797	GO:0031902:cellular_component:late endosome membrane	GO:0015031:biological_process:protein transport
Locus_21141.0|BlastHit|gi|82080896|sp|Q5ZHW7.1|F206A_CHICK	4800	GO:0016607:cellular_component:nuclear speck
Locus_21142.0|BlastHit|gi|20137671|sp|Q9UBX3.2|DIC_HUMAN	4803	GO:0016021:cellular_component:integral component of membrane	GO:0005743:cellular_component:mitochondrial inner membrane	GO:0005634:cellular_component:nucleus	GO:0005310:molecular_function:dicarboxylic acid transmembrane transporter activity	GO:0005975:biological_process:carbohydrate metabolic process	GO:0034641:biological_process:cellular nitrogen compound metabolic process	GO:0006835:biological_process:dicarboxylic acid transport	GO:0006094:biological_process:gluconeogenesis	GO:0006006:biological_process:glucose metabolic process	GO:0006811:biological_process:ion transport	GO:0006839:biological_process:mitochondrial transport	GO:0044281:biological_process:small molecule metabolic process	GO:0070221:biological_process:sulfide oxidation, using sulfide:quinone oxidoreductase	GO:0000098:biological_process:sulfur amino acid catabolic process	GO:0000096:biological_process:sulfur amino acid metabolic process	GO:0055085:biological_process:transmembrane transport
Locus_21143.0|BlastHit|gi|75070825|sp|Q5RC80.1|RBM39_PONAB	4804	GO:0005815:cellular_component:microtubule organizing center	GO:0016607:cellular_component:nuclear speck	GO:0000166:molecular_function:nucleotide binding	GO:0044822:molecular_function:poly(A) RNA binding	GO:0006397:biological_process:mRNA processing	GO:0006355:biological_process:regulation of transcription, DNA-templated	GO:0008380:biological_process:RNA splicing	GO:0006351:biological_process:transcription, DNA-templated
Locus_21226.1|BlastHit|gi|341942237|sp|P57716.3|NICA_MOUSE	4855	GO:0005783:cellular_component:endoplasmic reticulum	GO:0070062:cellular_component:extracellular vesicular exosome	GO:0005794:cellular_component:Golgi apparatus	GO:0005887:cellular_component:integral component of plasma membrane	GO:0005765:cellular_component:lysosomal membrane	GO:0042470:cellular_component:melanosome	GO:0016020:cellular_component:membrane	GO:0005886:cellular_component:plasma membrane	GO:0004175:molecular_function:endopeptidase activity	GO:0050435:biological_process:beta-amyloid metabolic process	GO:0050673:biological_process:epithelial cell proliferation	GO:0006509:biological_process:membrane protein ectodomain proteolysis	GO:0002262:biological_process:myeloid cell homeostasis	GO:0007219:biological_process:Notch signaling pathway	GO:0043085:biological_process:positive regulation of catalytic activity	GO:0016485:biological_process:protein processing	GO:0042098:biological_process:T cell proliferation
Locus_21234.0|BlastHit|gi|729072|sp|P80363.1|CCB23_ORCLI	4856	GO:0005509:molecular_function:calcium ion binding
Locus_21238.0|BlastHit|gi|6226551|sp|P29957.3|AMY_PSEHA	4859	GO:0004556:molecular_function:alpha-amylase activity	GO:0046872:molecular_function:metal ion binding	GO:0005975:biological_process:carbohydrate metabolic process
Locus_21247.0|BlastHit|gi|11133618|sp|Q9VHD2.1|MAAI2_DROME	4863	GO:0005737:cellular_component:cytoplasm	GO:0004364:molecular_function:glutathione transferase activity	GO:0016034:molecular_function:maleylacetoacetate isomerase activity	GO:0006749:biological_process:glutathione metabolic process	GO:0006559:biological_process:L-phenylalanine catabolic process	GO:0006572:biological_process:tyrosine catabolic process
Locus_21250.0|BlastHit|gi|62510618|sp|Q6PBY3.1|EDF1_DANRE	4864	GO:0005634:cellular_component:nucleus	GO:0043565:molecular_function:sequence-specific DNA binding	GO:0006355:biological_process:regulation of transcription, DNA-templated	GO:0006351:biological_process:transcription, DNA-templated
Locus_21266.0|BlastHit|gi|51317410|sp|P62775.2|MTPN_RAT	4875	GO:0030424:cellular_component:axon	GO:0005737:cellular_component:cytoplasm	GO:0005829:cellular_component:cytosol	GO:0070062:cellular_component:extracellular vesicular exosome	GO:0008290:cellular_component:F-actin capping protein complex	GO:0005634:cellular_component:nucleus	GO:0048471:cellular_component:perinuclear region of cytoplasm	GO:0006584:biological_process:catecholamine metabolic process	GO:0016049:biological_process:cell growth	GO:0021707:biological_process:cerebellar granule cell differentiation	GO:0030182:biological_process:neuron differentiation	GO:0010613:biological_process:positive regulation of cardiac muscle hypertrophy	GO:0030307:biological_process:positive regulation of cell growth	GO:0010557:biological_process:positive regulation of macromolecule biosynthetic process	GO:0051092:biological_process:positive regulation of NF-kappaB transcription factor activity	GO:0051247:biological_process:positive regulation of protein metabolic process	GO:2000812:biological_process:regulation of barbed-end actin filament capping	GO:0043403:biological_process:skeletal muscle tissue regeneration	GO:0051146:biological_process:striated muscle cell differentiation
Locus_21307.0|BlastHit|gi|82183924|sp|Q6GLV4.1|UBX1B_XENLA	4914	GO:0005737:cellular_component:cytoplasm	GO:0071796:molecular_function:K6-linked polyubiquitin binding	GO:0032435:biological_process:negative regulation of proteasomal ubiquitin-dependent protein catabolic process	GO:0031397:biological_process:negative regulation of protein ubiquitination
Locus_21324.1|BlastHit|gi|302393813|sp|Q9SHE7.3|RUB1_ARATH	4934	GO:0005829:cellular_component:cytosol	GO:0005634:cellular_component:nucleus	GO:0005886:cellular_component:plasma membrane	GO:0009793:biological_process:embryo development ending in seed dormancy	GO:0009693:biological_process:ethylene biosynthetic process	GO:0045116:biological_process:protein neddylation	GO:0009733:biological_process:response to auxin
Locus_21348.0|BlastHit|gi|82176830|sp|Q7ZYI9.1|CP057_XENLA	4941	GO:0005634:cellular_component:nucleus	GO:0004518:molecular_function:nuclease activity	GO:0006397:biological_process:mRNA processing	GO:0008380:biological_process:RNA splicing	GO:0034477:biological_process:U6 snRNA 3'-end processing
Locus_21401.0|BlastHit|gi|82186953|sp|Q6PBR7.1|RT63_DANRE	4953	GO:0005761:cellular_component:mitochondrial ribosome
Locus_21403.0|BlastHit|gi|18202945|sp|Q9H4M9.2|EHD1_HUMAN	4954	GO:0031901:cellular_component:early endosome membrane	GO:0030139:cellular_component:endocytic vesicle	GO:0010008:cellular_component:endosome membrane	GO:0070062:cellular_component:extracellular vesicular exosome	GO:0005811:cellular_component:lipid particle	GO:0048471:cellular_component:perinuclear region of cytoplasm	GO:0005886:cellular_component:plasma membrane	GO:0031095:cellular_component:platelet dense tubular network membrane	GO:0055038:cellular_component:recycling endosome membrane	GO:0005524:molecular_function:ATP binding	GO:0005509:molecular_function:calcium ion binding	GO:0005525:molecular_function:GTP binding	GO:0003924:molecular_function:GTPase activity	GO:1990090:biological_process:cellular response to nerve growth factor stimulus	GO:0042632:biological_process:cholesterol homeostasis	GO:0032456:biological_process:endocytic recycling	GO:0006897:biological_process:endocytosis	GO:0006886:biological_process:intracellular protein transport	GO:0034383:biological_process:low-density lipoprotein particle clearance	GO:0031175:biological_process:neuron projection development	GO:0010886:biological_process:positive regulation of cholesterol storage	GO:2001137:biological_process:positive regulation of endocytic recycling	GO:1901741:biological_process:positive regulation of myoblast fusion	GO:0051260:biological_process:protein homooligomerization
Locus_21403.0|BlastHit|gi|18202945|sp|Q9H4M9.2|EHD1_HUMAN	4956	GO:0031901:cellular_component:early endosome membrane	GO:0030139:cellular_component:endocytic vesicle	GO:0010008:cellular_component:endosome membrane	GO:0070062:cellular_component:extracellular vesicular exosome	GO:0005811:cellular_component:lipid particle	GO:0048471:cellular_component:perinuclear region of cytoplasm	GO:0005886:cellular_component:plasma membrane	GO:0031095:cellular_component:platelet dense tubular network membrane	GO:0055038:cellular_component:recycling endosome membrane	GO:0005524:molecular_function:ATP binding	GO:0005509:molecular_function:calcium ion binding	GO:0005525:molecular_function:GTP binding	GO:0003924:molecular_function:GTPase activity	GO:1990090:biological_process:cellular response to nerve growth factor stimulus	GO:0042632:biological_process:cholesterol homeostasis	GO:0032456:biological_process:endocytic recycling	GO:0006897:biological_process:endocytosis	GO:0006886:biological_process:intracellular protein transport	GO:0034383:biological_process:low-density lipoprotein particle clearance	GO:0031175:biological_process:neuron projection development	GO:0010886:biological_process:positive regulation of cholesterol storage	GO:2001137:biological_process:positive regulation of endocytic recycling	GO:1901741:biological_process:positive regulation of myoblast fusion	GO:0051260:biological_process:protein homooligomerization
Locus_21418.0|BlastHit|gi|18203660|sp|Q9Z2A0.2|PDPK1_MOUSE	4970	GO:0005737:cellular_component:cytoplasm	GO:0016023:cellular_component:cytoplasmic membrane-bounded vesicle	GO:0005829:cellular_component:cytosol	GO:0005925:cellular_component:focal adhesion	GO:0097481:cellular_component:neuronal postsynaptic density	GO:0005634:cellular_component:nucleus	GO:0005886:cellular_component:plasma membrane	GO:0004676:molecular_function:3-phosphoinositide-dependent protein kinase activity	GO:0005524:molecular_function:ATP binding	GO:0016004:molecular_function:phospholipase activator activity	GO:0032148:biological_process:activation of protein kinase B activity	GO:0019722:biological_process:calcium-mediated signaling	GO:0016477:biological_process:cell migration	GO:0071364:biological_process:cellular response to epidermal growth factor stimulus	GO:0032869:biological_process:cellular response to insulin stimulus	GO:0007173:biological_process:epidermal growth factor receptor signaling pathway	GO:0097191:biological_process:extrinsic apoptotic signaling pathway	GO:0048041:biological_process:focal adhesion assembly	GO:0006972:biological_process:hyperosmotic response	GO:0010667:biological_process:negative regulation of cardiac muscle cell apoptotic process	GO:0006469:biological_process:negative regulation of protein kinase activity	GO:0034122:biological_process:negative regulation of toll-like receptor signaling pathway	GO:0030512:biological_process:negative regulation of transforming growth factor beta receptor signaling pathway	GO:0018107:biological_process:peptidyl-threonine phosphorylation	GO:0090004:biological_process:positive regulation of establishment of protein localization to plasma membrane	GO:0010518:biological_process:positive regulation of phospholipase activity	GO:0051281:biological_process:positive regulation of release of sequestered calcium ion into cytosol	GO:0010594:biological_process:regulation of endothelial cell migration	GO:0043122:biological_process:regulation of I-kappaB kinase/NF-kappaB signaling	GO:0043304:biological_process:regulation of mast cell degranulation	GO:0006355:biological_process:regulation of transcription, DNA-templated	GO:0007165:biological_process:signal transduction
Locus_21421.0|BlastHit|gi|74732856|sp|Q9BRA2.1|TXD17_HUMAN	4972	GO:0005829:cellular_component:cytosol	GO:0070062:cellular_component:extracellular vesicular exosome	GO:0009055:molecular_function:electron carrier activity	GO:0004601:molecular_function:peroxidase activity	GO:0047134:molecular_function:protein-disulfide reductase activity	GO:0055114:biological_process:oxidation-reduction process	GO:0033209:biological_process:tumor necrosis factor-mediated signaling pathway
Locus_21423.0|BlastHit|gi|205428140|sp|B2KI79.1|DOPP1_RHIFE	4974	GO:0005789:cellular_component:endoplasmic reticulum membrane	GO:0016021:cellular_component:integral component of membrane	GO:0047874:molecular_function:dolichyldiphosphatase activity	GO:0006486:biological_process:protein glycosylation
Locus_21468.0|BlastHit|gi|82202300|sp|Q6P026.1|BAF_DANRE	5009	GO:0005758:cellular_component:mitochondrial intermembrane space	GO:0016531:molecular_function:copper chaperone activity	GO:0006825:biological_process:copper ion transport
Locus_21468.0|BlastHit|gi|82202300|sp|Q6P026.1|BAF_DANRE	5009	GO:0005794:cellular_component:Golgi apparatus	GO:0016021:cellular_component:integral component of membrane	GO:0005886:cellular_component:plasma membrane	GO:0030154:biological_process:cell differentiation
Locus_21468.0|BlastHit|gi|82202300|sp|Q6P026.1|BAF_DANRE	5009	GO:0016592:cellular_component:mediator complex	GO:0001104:molecular_function:RNA polymerase II transcription cofactor activity	GO:0006366:biological_process:transcription from RNA polymerase II promoter
Locus_21468.0|BlastHit|gi|82202300|sp|Q6P026.1|BAF_DANRE	5009	GO:0005694:cellular_component:chromosome	GO:0005634:cellular_component:nucleus	GO:0003677:molecular_function:DNA binding
Locus_21470.0|BlastHit|gi|31076777|sp|Q9VKV5.1|LIN1_DROME	5011	GO:0005634:cellular_component:nucleus	GO:0022416:biological_process:chaeta development	GO:0048749:biological_process:compound eye development	GO:0006909:biological_process:phagocytosis	GO:0045742:biological_process:positive regulation of epidermal growth factor receptor signaling pathway	GO:0090303:biological_process:positive regulation of wound healing	GO:0035220:biological_process:wing disc development	GO:0042060:biological_process:wound healing
Locus_21476.0|BlastHit|gi|34921426|sp|O96790.2|DPGN_DIPMA	5018	GO:0005576:cellular_component:extracellular region	GO:0004867:molecular_function:serine-type endopeptidase inhibitor activity	GO:0050819:biological_process:negative regulation of coagulation	GO:0010951:biological_process:negative regulation of endopeptidase activity
Locus_21521.0|BlastHit|gi|82179561|sp|Q5M9B7.1|OSACB_XENLA	5039	GO:0016021:cellular_component:integral component of membrane	GO:0008250:cellular_component:oligosaccharyltransferase complex
Locus_21565.0|BlastHit|gi|341942096|sp|Q922B2.2|SYDC_MOUSE	5070	GO:0005737:cellular_component:cytoplasm	GO:0070062:cellular_component:extracellular vesicular exosome	GO:0016020:cellular_component:membrane	GO:0004815:molecular_function:aspartate-tRNA ligase activity	GO:0005524:molecular_function:ATP binding	GO:0044822:molecular_function:poly(A) RNA binding	GO:0006422:biological_process:aspartyl-tRNA aminoacylation
Locus_21593.0|BlastHit|gi|10720060|sp|Q9XYN1.1|INX2_SCHAM	5090	GO:0005921:cellular_component:gap junction	GO:0016021:cellular_component:integral component of membrane	GO:0005886:cellular_component:plasma membrane	GO:0005243:molecular_function:gap junction channel activity	GO:0006811:biological_process:ion transport	GO:0055085:biological_process:transmembrane transport
Locus_21595.0|BlastHit|gi|29337191|sp|Q24297.2|RUXF_DROME	5091	GO:0071013:cellular_component:catalytic step 2 spliceosome	GO:0071011:cellular_component:precatalytic spliceosome	GO:0030532:cellular_component:small nuclear ribonucleoprotein complex	GO:0005681:cellular_component:spliceosomal complex	GO:0003723:molecular_function:RNA binding	GO:0007052:biological_process:mitotic spindle organization	GO:0000398:biological_process:mRNA splicing, via spliceosome
Locus_21626.0|BlastHit|gi|14194431|sp|Q9UVX4.1|ACT_COPC7	5127	GO:0005737:cellular_component:cytoplasm	GO:0005856:cellular_component:cytoskeleton	GO:0005524:molecular_function:ATP binding
Locus_21650.0|BlastHit|gi|122117908|sp|Q178L7.1|SDHF2_AEDAE	5140	GO:0005739:cellular_component:mitochondrion	GO:0006121:biological_process:mitochondrial electron transport, succinate to ubiquinone	GO:0018293:biological_process:protein-FAD linkage
Locus_21663.0|BlastHit|gi|82087410|sp|Q6PUR6.1|GPN2_DANRE	5161	GO:0005525:molecular_function:GTP binding
Locus_21697.0|BlastHit|gi|84029407|sp|Q9NWZ5.2|UCKL1_HUMAN	5177	GO:0005737:cellular_component:cytoplasm	GO:0005634:cellular_component:nucleus	GO:0005524:molecular_function:ATP binding	GO:0004849:molecular_function:uridine kinase activity	GO:0044211:biological_process:CTP salvage	GO:0044206:biological_process:UMP salvage	GO:0016032:biological_process:viral process
Locus_21702.0|BlastHit|gi|464989|sp|Q05120.1|UBIL_NPVOP	5178	GO:0039648:biological_process:modulation by virus of host protein ubiquitination
Locus_21706.0|BlastHit|gi|205786023|sp|Q28ID3.2|GLRX3_XENTR	5179	GO:0005938:cellular_component:cell cortex	GO:0009055:molecular_function:electron carrier activity	GO:0051536:molecular_function:iron-sulfur cluster binding	GO:0046872:molecular_function:metal ion binding	GO:0015035:molecular_function:protein disulfide oxidoreductase activity	GO:0045454:biological_process:cell redox homeostasis
Locus_21707.0|BlastHit|gi|47605558|sp|Q9PTY0.1|ATPB_CYPCA	5180	GO:0005743:cellular_component:mitochondrial inner membrane	GO:0045261:cellular_component:proton-transporting ATP synthase complex, catalytic core F(1)	GO:0005524:molecular_function:ATP binding	GO:0046933:molecular_function:proton-transporting ATP synthase activity, rotational mechanism	GO:0015991:biological_process:ATP hydrolysis coupled proton transport	GO:0015986:biological_process:ATP synthesis coupled proton transport
Locus_21718.0|BlastHit|gi|1169687|sp|P45878.1|FKBP2_MOUSE	5187	GO:0005783:cellular_component:endoplasmic reticulum	GO:0005789:cellular_component:endoplasmic reticulum membrane	GO:0070062:cellular_component:extracellular vesicular exosome	GO:0005528:molecular_function:FK506 binding	GO:0003755:molecular_function:peptidyl-prolyl cis-trans isomerase activity	GO:0061077:biological_process:chaperone-mediated protein folding	GO:0000413:biological_process:protein peptidyl-prolyl isomerization
Locus_21719.0|BlastHit|gi|55976430|sp|Q6NRT5.1|CSN1_XENLA	5188	GO:0008180:cellular_component:COP9 signalosome	GO:0005737:cellular_component:cytoplasm
Locus_21720.0|BlastHit|gi|3122926|sp|Q14186.1|TFDP1_HUMAN	5189	GO:0005654:cellular_component:nucleoplasm	GO:0005667:cellular_component:transcription factor complex	GO:0003677:molecular_function:DNA binding	GO:0019904:molecular_function:protein domain specific binding	GO:0003700:molecular_function:sequence-specific DNA binding transcription factor activity	GO:0003713:molecular_function:transcription coactivator activity	GO:0008134:molecular_function:transcription factor binding	GO:0043276:biological_process:anoikis	GO:0006915:biological_process:apoptotic process	GO:0008283:biological_process:cell proliferation	GO:0008544:biological_process:epidermis development	GO:0000082:biological_process:G1/S transition of mitotic cell cycle	GO:0010467:biological_process:gene expression	GO:0097193:biological_process:intrinsic apoptotic signaling pathway	GO:0000278:biological_process:mitotic cell cycle	GO:0007219:biological_process:Notch signaling pathway	GO:1900740:biological_process:positive regulation of protein insertion into mitochondrial membrane involved in apoptotic signaling pathway	GO:0045944:biological_process:positive regulation of transcription from RNA polymerase II promoter	GO:2000278:biological_process:regulation of DNA biosynthetic process	GO:0006357:biological_process:regulation of transcription from RNA polymerase II promoter	GO:0006367:biological_process:transcription initiation from RNA polymerase II promoter	GO:0006351:biological_process:transcription, DNA-templated	GO:0007179:biological_process:transforming growth factor beta receptor signaling pathway
Locus_21725.0|BlastHit|gi|26006939|sp|P14599.2|A4_DROME	5197	GO:0005576:cellular_component:extracellular region	GO:0016021:cellular_component:integral component of membrane	GO:0005886:cellular_component:plasma membrane	GO:0008201:molecular_function:heparin binding	GO:0046914:molecular_function:transition metal ion binding	GO:0007616:biological_process:long-term memory	GO:1901215:biological_process:negative regulation of neuron death	GO:0048812:biological_process:neuron projection morphogenesis	GO:0007422:biological_process:peripheral nervous system development	GO:0048678:biological_process:response to axon injury	GO:0050808:biological_process:synapse organization
Locus_21725.1|BlastHit|gi|20454792|sp|Q10651.2|A4_CAEEL	5198	GO:0031410:cellular_component:cytoplasmic vesicle	GO:0016021:cellular_component:integral component of membrane	GO:0043005:cellular_component:neuron projection	GO:0043025:cellular_component:neuronal cell body	GO:0008201:molecular_function:heparin binding	GO:0046914:molecular_function:transition metal ion binding	GO:0010171:biological_process:body morphogenesis	GO:0030154:biological_process:cell differentiation	GO:0042395:biological_process:ecdysis, collagen and cuticulin-based cuticle	GO:0002119:biological_process:nematode larval development	GO:0007399:biological_process:nervous system development
Locus_21730.0|BlastHit|gi|143811413|sp|Q58CV6.2|KLDC3_BOVIN	5200	GO:0005737:cellular_component:cytoplasm	GO:0051321:biological_process:meiotic cell cycle
Locus_21735.0|BlastHit|gi|259016361|sp|Q5VYJ5.3|CJ112_HUMAN	5201	GO:0005576:cellular_component:extracellular region	GO:0016020:cellular_component:membrane
Locus_21740.0|BlastHit|gi|401248|sp|P23004.2|QCR2_BOVIN	5203	GO:0070062:cellular_component:extracellular vesicular exosome	GO:0005750:cellular_component:mitochondrial respiratory chain complex III	GO:0046872:molecular_function:metal ion binding	GO:0004222:molecular_function:metalloendopeptidase activity	GO:0055114:biological_process:oxidation-reduction process
Locus_21773.0|BlastHit|gi|118573683|sp|Q96GC5.2|RM48_HUMAN	5224	GO:0005761:cellular_component:mitochondrial ribosome
Locus_21777.0|BlastHit|gi|122146150|sp|Q3SZ22.1|RM46_BOVIN	5226	GO:0005739:cellular_component:mitochondrion	GO:0005840:cellular_component:ribosome	GO:0016787:molecular_function:hydrolase activity
Locus_21797.0|BlastHit|gi|1707892|sp|P52565.3|GDIR1_HUMAN	5236	GO:0005737:cellular_component:cytoplasm	GO:0070062:cellular_component:extracellular vesicular exosome	GO:0001772:cellular_component:immunological synapse	GO:0005096:molecular_function:GTPase activator activity	GO:0005094:molecular_function:Rho GDP-dissociation inhibitor activity	GO:0030336:biological_process:negative regulation of cell migration	GO:0032880:biological_process:regulation of protein localization	GO:0007266:biological_process:Rho protein signal transduction	GO:0071526:biological_process:semaphorin-plexin signaling pathway
Locus_21801.0|BlastHit|gi|3334458|sp|P53348.2|BTG1_BOVIN	5239	GO:0005737:cellular_component:cytoplasm	GO:0005634:cellular_component:nucleus	GO:0019899:molecular_function:enzyme binding	GO:0008285:biological_process:negative regulation of cell proliferation	GO:0045766:biological_process:positive regulation of angiogenesis	GO:0045603:biological_process:positive regulation of endothelial cell differentiation	GO:2000271:biological_process:positive regulation of fibroblast apoptotic process	GO:0045663:biological_process:positive regulation of myoblast differentiation	GO:0006479:biological_process:protein methylation	GO:0006979:biological_process:response to oxidative stress	GO:0043434:biological_process:response to peptide hormone	GO:0007286:biological_process:spermatid development	GO:0007283:biological_process:spermatogenesis
Locus_21814.0|BlastHit|gi|238064958|sp|A1ZAI5.1|FACR1_DROME	5250	GO:0016021:cellular_component:integral component of membrane	GO:0005778:cellular_component:peroxisomal membrane	GO:0005777:cellular_component:peroxisome	GO:0080019:molecular_function:fatty-acyl-CoA reductase (alcohol-forming) activity	GO:0050062:molecular_function:long-chain-fatty-acyl-CoA reductase activity	GO:0006629:biological_process:lipid metabolic process	GO:0010025:biological_process:wax biosynthetic process
Locus_21815.0|BlastHit|gi|74967036|sp|Q24423.1|NOC_DROME	5251	GO:0005634:cellular_component:nucleus	GO:0003677:molecular_function:DNA binding	GO:0046872:molecular_function:metal ion binding	GO:0007420:biological_process:brain development	GO:0008283:biological_process:cell proliferation	GO:0001752:biological_process:compound eye photoreceptor fate commitment	GO:0035214:biological_process:eye-antennal disc development	GO:0002121:biological_process:inter-male aggressive behavior	GO:0035218:biological_process:leg disc development	GO:0010629:biological_process:negative regulation of gene expression	GO:0007219:biological_process:Notch signaling pathway	GO:0008056:biological_process:ocellus development	GO:0007424:biological_process:open tracheal system development	GO:0006357:biological_process:regulation of transcription from RNA polymerase II promoter	GO:0007430:biological_process:terminal branching, open tracheal system	GO:0035220:biological_process:wing disc development
Locus_21859.1|BlastHit|gi|2500907|sp|Q24143.1|HR96_DROME	5291	GO:0005634:cellular_component:nucleus	GO:0004879:molecular_function:ligand-activated sequence-specific DNA binding RNA polymerase II transcription factor activity	GO:0000977:molecular_function:RNA polymerase II regulatory region sequence-specific DNA binding	GO:0003707:molecular_function:steroid hormone receptor activity	GO:0008270:molecular_function:zinc ion binding	GO:0042632:biological_process:cholesterol homeostasis	GO:0030522:biological_process:intracellular receptor signaling pathway	GO:0070873:biological_process:regulation of glycogen metabolic process	GO:0042594:biological_process:response to starvation	GO:0070328:biological_process:triglyceride homeostasis
Locus_21871.0|BlastHit|gi|81887353|sp|Q505J8.1|SYFA_RAT	5301	GO:0005737:cellular_component:cytoplasm	GO:0016020:cellular_component:membrane	GO:0005524:molecular_function:ATP binding	GO:0004826:molecular_function:phenylalanine-tRNA ligase activity	GO:0044822:molecular_function:poly(A) RNA binding	GO:0000049:molecular_function:tRNA binding	GO:0006432:biological_process:phenylalanyl-tRNA aminoacylation
Locus_21872.0|BlastHit|gi|215275262|sp|Q5DC69.2|CH10_SCHJA	5303	GO:0005759:cellular_component:mitochondrial matrix	GO:0005524:molecular_function:ATP binding	GO:0006457:biological_process:protein folding
Locus_21874.0|BlastHit|gi|25090641|sp|O18391.1|KRAK_DROME	5304	GO:0052689:molecular_function:carboxylic ester hydrolase activity	GO:0017171:molecular_function:serine hydrolase activity	GO:0007586:biological_process:digestion	GO:0008152:biological_process:metabolic process	GO:0007275:biological_process:multicellular organismal development	GO:0009636:biological_process:response to toxic substance
Locus_21894.0|BlastHit|gi|30913213|sp|Q9JK84.1|PAR6G_MOUSE	5318	GO:0005737:cellular_component:cytoplasm	GO:0005886:cellular_component:plasma membrane	GO:0043234:cellular_component:protein complex	GO:0005923:cellular_component:tight junction	GO:0007049:biological_process:cell cycle	GO:0051301:biological_process:cell division
Locus_21897.0|BlastHit|gi|88909158|sp|Q4G061.1|EIF3B_RAT	5319	GO:0016282:cellular_component:eukaryotic 43S preinitiation complex	GO:0033290:cellular_component:eukaryotic 48S preinitiation complex	GO:0005852:cellular_component:eukaryotic translation initiation factor 3 complex	GO:0071541:cellular_component:eukaryotic translation initiation factor 3 complex, eIF3m	GO:0070062:cellular_component:extracellular vesicular exosome	GO:0000166:molecular_function:nucleotide binding	GO:0003743:molecular_function:translation initiation factor activity	GO:0001731:biological_process:formation of translation preinitiation complex	GO:0006446:biological_process:regulation of translational initiation	GO:0006413:biological_process:translational initiation
Locus_21913.0|BlastHit|gi|3024715|sp|O08807.1|PRDX4_MOUSE	5327	GO:0005737:cellular_component:cytoplasm	GO:0005829:cellular_component:cytosol	GO:0005783:cellular_component:endoplasmic reticulum	GO:0005615:cellular_component:extracellular space	GO:0070062:cellular_component:extracellular vesicular exosome	GO:0005739:cellular_component:mitochondrion	GO:0005634:cellular_component:nucleus	GO:0005790:cellular_component:smooth endoplasmic reticulum	GO:0004601:molecular_function:peroxidase activity	GO:0051920:molecular_function:peroxiredoxin activity	GO:0042803:molecular_function:protein homodimerization activity	GO:0019471:biological_process:4-hydroxyproline metabolic process	GO:0045454:biological_process:cell redox homeostasis	GO:0030198:biological_process:extracellular matrix organization	GO:0008584:biological_process:male gonad development	GO:2000255:biological_process:negative regulation of male germ cell proliferation	GO:0055114:biological_process:oxidation-reduction process	GO:0022417:biological_process:protein maturation by protein folding	GO:0072593:biological_process:reactive oxygen species metabolic process	GO:0007283:biological_process:spermatogenesis
Locus_21930.0|BlastHit|gi|547973|sp|P35415.1|MYSP1_DROME	5337	GO:0030016:cellular_component:myofibril	GO:0032982:cellular_component:myosin filament	GO:0003774:molecular_function:motor activity
Locus_21940.0|BlastHit|gi|122134262|sp|Q1LZ78.1|NTPCR_BOVIN	5345	GO:0005524:molecular_function:ATP binding	GO:0017111:molecular_function:nucleoside-triphosphatase activity	GO:0098519:molecular_function:nucleotide phosphatase activity, acting on free nucleotides
Locus_22007.0|BlastHit|gi|81878382|sp|Q8K0V2.1|DCNL3_MOUSE	5374	GO:0048471:cellular_component:perinuclear region of cytoplasm	GO:0030308:biological_process:negative regulation of cell growth	GO:0043065:biological_process:positive regulation of apoptotic process	GO:0010332:biological_process:response to gamma radiation	GO:0010225:biological_process:response to UV-C
Locus_22013.0|BlastHit|gi|114389|sp|P25169.1|AT1B1_ARTSF	5376	GO:0005890:cellular_component:sodium:potassium-exchanging ATPase complex	GO:0006813:biological_process:potassium ion transport	GO:0006814:biological_process:sodium ion transport
Locus_22014.0|BlastHit|gi|23821818|sp|O46419.1|LIPT_BOVIN	5377	GO:0005739:cellular_component:mitochondrion	GO:0016746:molecular_function:transferase activity, transferring acyl groups	GO:0009249:biological_process:protein lipoylation
Locus_22019.0|BlastHit|gi|75056123|sp|Q9GLE4.1|MMP14_BOVIN	5379	GO:0031012:cellular_component:extracellular matrix	GO:0016021:cellular_component:integral component of membrane	GO:0042470:cellular_component:melanosome	GO:0005509:molecular_function:calcium ion binding	GO:0004222:molecular_function:metalloendopeptidase activity	GO:0008270:molecular_function:zinc ion binding	GO:0048754:biological_process:branching morphogenesis of an epithelial tube	GO:0016477:biological_process:cell migration	GO:0030324:biological_process:lung development	GO:0030307:biological_process:positive regulation of cell growth	GO:0030335:biological_process:positive regulation of cell migration	GO:0031638:biological_process:zymogen activation
Locus_22035.0|BlastHit|gi|1705630|sp|P00787.2|CATB_RAT	5382	GO:0005615:cellular_component:extracellular space	GO:0070062:cellular_component:extracellular vesicular exosome	GO:0005764:cellular_component:lysosome	GO:0042470:cellular_component:melanosome	GO:0005739:cellular_component:mitochondrion	GO:0005730:cellular_component:nucleolus	GO:0048471:cellular_component:perinuclear region of cytoplasm	GO:0004197:molecular_function:cysteine-type endopeptidase activity	GO:0097067:biological_process:cellular response to thyroid hormone stimulus	GO:0030574:biological_process:collagen catabolic process	GO:0046697:biological_process:decidualization	GO:0030855:biological_process:epithelial cell differentiation	GO:0051603:biological_process:proteolysis involved in cellular protein catabolic process	GO:0050790:biological_process:regulation of catalytic activity
Locus_22088.0|BlastHit|gi|6226045|sp|O14807.2|RASM_HUMAN	5407	GO:0070062:cellular_component:extracellular vesicular exosome	GO:0005886:cellular_component:plasma membrane	GO:0005525:molecular_function:GTP binding	GO:0030742:molecular_function:GTP-dependent protein binding	GO:0003924:molecular_function:GTPase activity	GO:0030036:biological_process:actin cytoskeleton organization	GO:0007275:biological_process:multicellular organismal development	GO:0007517:biological_process:muscle organ development	GO:0007265:biological_process:Ras protein signal transduction
Locus_22089.0|BlastHit|gi|124231|sp|P10160.2|IF5A1_RABIT	5408	GO:0005789:cellular_component:endoplasmic reticulum membrane	GO:0005643:cellular_component:nuclear pore	GO:0043022:molecular_function:ribosome binding	GO:0003746:molecular_function:translation elongation factor activity	GO:0051028:biological_process:mRNA transport	GO:0008612:biological_process:peptidyl-lysine modification to peptidyl-hypusine	GO:0045727:biological_process:positive regulation of translation	GO:0045901:biological_process:positive regulation of translational elongation	GO:0045905:biological_process:positive regulation of translational termination	GO:0015031:biological_process:protein transport	GO:0006452:biological_process:translational frameshifting
Locus_22121.0|BlastHit|gi|82192798|sp|Q503P2.1|NIP7_DANRE	5424	GO:0005730:cellular_component:nucleolus	GO:0003723:molecular_function:RNA binding	GO:0042255:biological_process:ribosome assembly
Locus_22145.0|BlastHit|gi|317374848|sp|A0MTA1.1|APEX1_DANRE	5437	GO:0005783:cellular_component:endoplasmic reticulum	GO:0005739:cellular_component:mitochondrion	GO:0016607:cellular_component:nuclear speck	GO:0005730:cellular_component:nucleolus	GO:0003677:molecular_function:DNA binding	GO:0003906:molecular_function:DNA-(apurinic or apyrimidinic site) lyase activity	GO:0046872:molecular_function:metal ion binding	GO:0003723:molecular_function:RNA binding	GO:0080111:biological_process:DNA demethylation	GO:0006281:biological_process:DNA repair
Locus_22176.0|BlastHit|gi|1710845|sp|P51893.1|SAHHA_XENLA	5451	GO:0004013:molecular_function:adenosylhomocysteinase activity	GO:0006730:biological_process:one-carbon metabolic process
Locus_22207.0|BlastHit|gi|115502310|sp|Q0MQC7.1|NDUB2_PONPY	5465	GO:0005747:cellular_component:mitochondrial respiratory chain complex I	GO:0055114:biological_process:oxidation-reduction process
Locus_22213.0|BlastHit|gi|34922029|sp|Q96KC2.1|ARL5B_HUMAN	5466	GO:0005622:cellular_component:intracellular	GO:0005525:molecular_function:GTP binding	GO:0007264:biological_process:small GTPase mediated signal transduction
Locus_22250.0|BlastHit|gi|46397431|sp|Q9H4G4.3|GAPR1_HUMAN	5482	GO:0070062:cellular_component:extracellular vesicular exosome	GO:0000139:cellular_component:Golgi membrane	GO:0042803:molecular_function:protein homodimerization activity	GO:0010634:biological_process:positive regulation of epithelial cell migration	GO:0010718:biological_process:positive regulation of epithelial to mesenchymal transition	GO:0070374:biological_process:positive regulation of ERK1 and ERK2 cascade
Locus_22256.0|BlastHit|gi|12643708|sp|Q01069.2|ESMB_DROME	5487	GO:0005634:cellular_component:nucleus	GO:0043565:molecular_function:sequence-specific DNA binding	GO:0003700:molecular_function:sequence-specific DNA binding transcription factor activity	GO:0030154:biological_process:cell differentiation	GO:0048749:biological_process:compound eye development	GO:0000122:biological_process:negative regulation of transcription from RNA polymerase II promoter	GO:0007399:biological_process:nervous system development	GO:0007219:biological_process:Notch signaling pathway	GO:0006351:biological_process:transcription, DNA-templated
Locus_22296.0|BlastHit|gi|3121830|sp|Q24572.1|CAF1_DROME	5505	GO:0033186:cellular_component:CAF-1 complex	GO:0035098:cellular_component:ESC/E(Z) complex	GO:0035097:cellular_component:histone methyltransferase complex	GO:0031523:cellular_component:Myb complex	GO:0005634:cellular_component:nucleus	GO:0016581:cellular_component:NuRD complex	GO:0016589:cellular_component:NURF complex	GO:0005700:cellular_component:polytene chromosome	GO:0070822:cellular_component:Sin3-type complex	GO:0005667:cellular_component:transcription factor complex	GO:0035035:molecular_function:histone acetyltransferase binding	GO:0042393:molecular_function:histone binding	GO:0042826:molecular_function:histone deacetylase binding	GO:0042803:molecular_function:protein homodimerization activity	GO:0031497:biological_process:chromatin assembly	GO:0006342:biological_process:chromatin silencing	GO:0048813:biological_process:dendrite morphogenesis	GO:0006281:biological_process:DNA repair	GO:0007307:biological_process:eggshell chorion gene amplification	GO:0016573:biological_process:histone acetylation	GO:0070734:biological_process:histone H3-K27 methylation	GO:0051567:biological_process:histone H3-K9 methylation	GO:0016571:biological_process:histone methylation	GO:0000281:biological_process:mitotic cytokinesis	GO:0007517:biological_process:muscle organ development	GO:0000122:biological_process:negative regulation of transcription from RNA polymerase II promoter	GO:0048666:biological_process:neuron development	GO:0048812:biological_process:neuron projection morphogenesis	GO:0006334:biological_process:nucleosome assembly	GO:0042766:biological_process:nucleosome mobilization	GO:0016584:biological_process:nucleosome positioning	GO:0008284:biological_process:positive regulation of cell proliferation
Locus_22318.0|BlastHit|gi|81882206|sp|P70280.1|VAMP7_MOUSE	5534	GO:0045177:cellular_component:apical part of cell	GO:0030054:cellular_component:cell junction	GO:0009986:cellular_component:cell surface	GO:0005789:cellular_component:endoplasmic reticulum membrane	GO:0070062:cellular_component:extracellular vesicular exosome	GO:0005794:cellular_component:Golgi apparatus	GO:0016021:cellular_component:integral component of membrane	GO:0031902:cellular_component:late endosome membrane	GO:0005765:cellular_component:lysosomal membrane	GO:0043005:cellular_component:neuron projection	GO:0048471:cellular_component:perinuclear region of cytoplasm	GO:0045335:cellular_component:phagocytic vesicle	GO:0030670:cellular_component:phagocytic vesicle membrane	GO:0031201:cellular_component:SNARE complex	GO:0045202:cellular_component:synapse	GO:0030658:cellular_component:transport vesicle membrane	GO:0017156:biological_process:calcium ion-dependent exocytosis	GO:0008333:biological_process:endosome to lysosome transport	GO:0043308:biological_process:eosinophil degranulation	GO:0006888:biological_process:ER to Golgi vesicle-mediated transport	GO:0043001:biological_process:Golgi to plasma membrane protein transport	GO:0043312:biological_process:neutrophil degranulation	GO:0006911:biological_process:phagocytosis, engulfment	GO:1900483:biological_process:regulation of protein targeting to vacuolar membrane	GO:0035493:biological_process:SNARE complex assembly	GO:0034197:biological_process:triglyceride transport	GO:0006906:biological_process:vesicle fusion	GO:0048280:biological_process:vesicle fusion with Golgi apparatus	GO:0016192:biological_process:vesicle-mediated transport
Locus_22322.0|BlastHit|gi|730031|sp|P40423.1|SQH_DROME	5539	GO:0005912:cellular_component:adherens junction	GO:0016324:cellular_component:apical plasma membrane	GO:0005938:cellular_component:cell cortex	GO:0032154:cellular_component:cleavage furrow	GO:0005737:cellular_component:cytoplasm	GO:0035183:cellular_component:female germline ring canal inner rim	GO:0030496:cellular_component:midbody	GO:0016460:cellular_component:myosin II complex	GO:0005886:cellular_component:plasma membrane	GO:0051233:cellular_component:spindle midzone	GO:0005509:molecular_function:calcium ion binding	GO:0032036:molecular_function:myosin heavy chain binding	GO:0030048:biological_process:actin filament-based movement	GO:0007298:biological_process:border follicle cell migration	GO:0090254:biological_process:cell elongation involved in imaginal disc-derived wing morphogenesis	GO:0019749:biological_process:cytoskeleton-dependent cytoplasmic transport, nurse cell to oocyte	GO:0001736:biological_process:establishment of planar polarity	GO:0060288:biological_process:formation of a compartment boundary	GO:0035317:biological_process:imaginal disc-derived wing hair organization	GO:0000281:biological_process:mitotic cytokinesis	GO:0022008:biological_process:neurogenesis	GO:0035191:biological_process:nuclear axial expansion	GO:0030707:biological_process:ovarian follicle cell development	GO:0007300:biological_process:ovarian nurse cell to oocyte transport	GO:0032956:biological_process:regulation of actin cytoskeleton organization	GO:0035159:biological_process:regulation of tube length, open tracheal system	GO:0035277:biological_process:spiracle morphogenesis, open tracheal system	GO:0042060:biological_process:wound healing
Locus_22323.1|BlastHit|gi|91207142|sp|Q9NT99.3|LRC4B_HUMAN	5540	GO:0005576:cellular_component:extracellular region
Locus_22353.0|BlastHit|gi|347662469|sp|D3ZVF4.1|TPPC2_RAT	5556	GO:0005783:cellular_component:endoplasmic reticulum	GO:0005794:cellular_component:Golgi apparatus	GO:0005634:cellular_component:nucleus	GO:0048471:cellular_component:perinuclear region of cytoplasm	GO:0006888:biological_process:ER to Golgi vesicle-mediated transport	GO:0006351:biological_process:transcription, DNA-templated
Locus_22356.0|BlastHit|gi|3182898|sp|O18500.1|ACT2_SACKO	5560	GO:0005737:cellular_component:cytoplasm	GO:0005856:cellular_component:cytoskeleton	GO:0005524:molecular_function:ATP binding
Locus_22356.0|BlastHit|gi|543768|sp|Q03342.1|ACT3_ECHGR	5563	GO:0005737:cellular_component:cytoplasm	GO:0005856:cellular_component:cytoskeleton	GO:0005524:molecular_function:ATP binding
Locus_22367.0|BlastHit|gi|55584008|sp|Q9W1V3.1|FBRL_DROME	5569	GO:0015030:cellular_component:Cajal body	GO:0001651:cellular_component:dense fibrillar component	GO:0005730:cellular_component:nucleolus	GO:0030532:cellular_component:small nuclear ribonucleoprotein complex	GO:0005732:cellular_component:small nucleolar ribonucleoprotein complex	GO:0008168:molecular_function:methyltransferase activity	GO:0003723:molecular_function:RNA binding	GO:0051297:biological_process:centrosome organization	GO:0006396:biological_process:RNA processing	GO:0006364:biological_process:rRNA processing	GO:0008033:biological_process:tRNA processing
Locus_22400.0|BlastHit|gi|81903609|sp|Q9CR10.1|CQ090_MOUSE	5585	GO:0005739:cellular_component:mitochondrion
Locus_22403.0|BlastHit|gi|122144044|sp|Q3SZB4.1|ACADM_BOVIN	5586	GO:0005759:cellular_component:mitochondrial matrix	GO:0003995:molecular_function:acyl-CoA dehydrogenase activity	GO:0050660:molecular_function:flavin adenine dinucleotide binding	GO:0070991:molecular_function:medium-chain-acyl-CoA dehydrogenase activity	GO:0055007:biological_process:cardiac muscle cell differentiation	GO:0019254:biological_process:carnitine metabolic process, CoA-linked	GO:0006635:biological_process:fatty acid beta-oxidation	GO:0033539:biological_process:fatty acid beta-oxidation using acyl-CoA dehydrogenase	GO:0005978:biological_process:glycogen biosynthetic process	GO:0001889:biological_process:liver development	GO:0051791:biological_process:medium-chain fatty acid metabolic process	GO:0009791:biological_process:post-embryonic development	GO:0006111:biological_process:regulation of gluconeogenesis	GO:0009409:biological_process:response to cold	GO:0042594:biological_process:response to starvation
Locus_22412.0|BlastHit|gi|1171668|sp|P42325.2|NCAH_DROME	5592	GO:0005509:molecular_function:calcium ion binding
Locus_22413.0|BlastHit|gi|68565951|sp|Q9V3U2.1|NHP2_DROME	5593	GO:0005730:cellular_component:nucleolus	GO:0005732:cellular_component:small nucleolar ribonucleoprotein complex	GO:0030515:molecular_function:snoRNA binding	GO:0031118:biological_process:rRNA pseudouridine synthesis
Locus_22426.0|BlastHit|gi|75571440|sp|Q5ZM33.1|HP1B3_CHICK	5595	GO:0000786:cellular_component:nucleosome	GO:0005634:cellular_component:nucleus	GO:0003677:molecular_function:DNA binding	GO:0006334:biological_process:nucleosome assembly
Locus_22450.0|BlastHit|gi|74869676|sp|Q9VL13.1|MOB3_DROME	5600	GO:0046872:molecular_function:metal ion binding	GO:0019901:molecular_function:protein kinase binding
Locus_22468.0|BlastHit|gi|3914023|sp|O43772.1|MCAT_HUMAN	5629	GO:0016021:cellular_component:integral component of membrane	GO:0005743:cellular_component:mitochondrial inner membrane	GO:0005739:cellular_component:mitochondrion	GO:0006853:biological_process:carnitine shuttle	GO:0044255:biological_process:cellular lipid metabolic process	GO:0044281:biological_process:small molecule metabolic process
Locus_22477.0|BlastHit|gi|12644154|sp|P20042.2|IF2B_HUMAN	5631	GO:0046872:molecular_function:metal ion binding	GO:0044822:molecular_function:poly(A) RNA binding	GO:0003743:molecular_function:translation initiation factor activity	GO:0001701:biological_process:in utero embryonic development	GO:0002176:biological_process:male germ cell proliferation	GO:0008584:biological_process:male gonad development
Locus_22479.0|BlastHit|gi|38258901|sp|P13582.3|EAST_DROME	5632	GO:0005576:cellular_component:extracellular region	GO:0008233:molecular_function:peptidase activity	GO:0004252:molecular_function:serine-type endopeptidase activity	GO:0008236:molecular_function:serine-type peptidase activity	GO:0009950:biological_process:dorsal/ventral axis specification	GO:0007311:biological_process:maternal specification of dorsal/ventral axis, oocyte, germ-line encoded	GO:0006508:biological_process:proteolysis	GO:0008063:biological_process:Toll signaling pathway	GO:0031638:biological_process:zymogen activation
Locus_22488.0|BlastHit|gi|81903012|sp|Q99J59.1|TSN1_MOUSE	5635	GO:0070062:cellular_component:extracellular vesicular exosome	GO:0016021:cellular_component:integral component of membrane	GO:0005765:cellular_component:lysosomal membrane	GO:0048471:cellular_component:perinuclear region of cytoplasm	GO:0005886:cellular_component:plasma membrane	GO:0015403:molecular_function:thiamine uptake transmembrane transporter activity	GO:0016477:biological_process:cell migration	GO:0008283:biological_process:cell proliferation	GO:0045807:biological_process:positive regulation of endocytosis	GO:0050821:biological_process:protein stabilization
Locus_22499.0|BlastHit|gi|52783086|sp|Q921Y2.1|IMP3_MOUSE	5643	GO:0005730:cellular_component:nucleolus	GO:0030529:cellular_component:ribonucleoprotein complex	GO:0044822:molecular_function:poly(A) RNA binding	GO:0019843:molecular_function:rRNA binding	GO:0030519:molecular_function:snoRNP binding	GO:0006364:biological_process:rRNA processing
Locus_22501.0|BlastHit|gi|20141793|sp|Q15428.2|SF3A2_HUMAN	5646	GO:0071013:cellular_component:catalytic step 2 spliceosome	GO:0005654:cellular_component:nucleoplasm	GO:0030532:cellular_component:small nuclear ribonucleoprotein complex	GO:0005681:cellular_component:spliceosomal complex	GO:0044822:molecular_function:poly(A) RNA binding	GO:0008270:molecular_function:zinc ion binding	GO:0010467:biological_process:gene expression	GO:0000389:biological_process:mRNA 3'-splice site recognition	GO:0006397:biological_process:mRNA processing	GO:0000398:biological_process:mRNA splicing, via spliceosome	GO:0008380:biological_process:RNA splicing
Locus_22514.0|BlastHit|gi|82184989|sp|Q6IQE9.1|ALKB6_DANRE	5654	GO:0005737:cellular_component:cytoplasm	GO:0005634:cellular_component:nucleus	GO:0046872:molecular_function:metal ion binding	GO:0016706:molecular_function:oxidoreductase activity, acting on paired donors, with incorporation or reduction of molecular oxygen, 2-oxoglutarate as one donor, and incorporation of one atom each of oxygen into both donors
Locus_22516.0|BlastHit|gi|82180250|sp|Q5XGC5.1|PSMG2_XENTR	5655	GO:0005634:cellular_component:nucleus	GO:0043248:biological_process:proteasome assembly
Locus_22530.0|BlastHit|gi|109940163|sp|P82928.2|RT28_BOVIN	5663	GO:0005739:cellular_component:mitochondrion	GO:0005840:cellular_component:ribosome	GO:0044822:molecular_function:poly(A) RNA binding
Locus_22547.0|BlastHit|gi|12643402|sp|Q92506.2|DHB8_HUMAN	5673	GO:0005740:cellular_component:mitochondrial envelope	GO:0005759:cellular_component:mitochondrial matrix	GO:0005886:cellular_component:plasma membrane	GO:0003857:molecular_function:3-hydroxyacyl-CoA dehydrogenase activity	GO:0004303:molecular_function:estradiol 17-beta-dehydrogenase activity	GO:0047035:molecular_function:testosterone dehydrogenase (NAD+) activity	GO:0008209:biological_process:androgen metabolic process	GO:0006703:biological_process:estrogen biosynthetic process	GO:0006633:biological_process:fatty acid biosynthetic process
Locus_22556.0|BlastHit|gi|1174974|sp|P41366.1|VMO1_CHICK	5680	GO:0070062:cellular_component:extracellular vesicular exosome
Locus_22564.0|BlastHit|gi|118373|sp|P27117.1|DCOR_BOVIN	5689	GO:0005737:cellular_component:cytoplasm	GO:0005829:cellular_component:cytosol	GO:0004586:molecular_function:ornithine decarboxylase activity	GO:0042803:molecular_function:protein homodimerization activity	GO:0001822:biological_process:kidney development	GO:0008284:biological_process:positive regulation of cell proliferation	GO:0033387:biological_process:putrescine biosynthetic process from ornithine	GO:0042176:biological_process:regulation of protein catabolic process
Locus_22592.0|BlastHit|gi|135628|sp|P29052.1|TF2B_DROME	5710	GO:0005634:cellular_component:nucleus	GO:0005667:cellular_component:transcription factor complex	GO:0008134:molecular_function:transcription factor binding	GO:0008270:molecular_function:zinc ion binding	GO:0051101:biological_process:regulation of DNA binding	GO:0006357:biological_process:regulation of transcription from RNA polymerase II promoter	GO:0006367:biological_process:transcription initiation from RNA polymerase II promoter	GO:0001174:biological_process:transcriptional start site selection at RNA polymerase II promoter
Locus_22605.0|BlastHit|gi|730564|sp|P39872.2|RL3_BOVIN	5718	GO:0005730:cellular_component:nucleolus	GO:0005840:cellular_component:ribosome	GO:0003735:molecular_function:structural constituent of ribosome	GO:0006412:biological_process:translation
Locus_22605.0|BlastHit|gi|730564|sp|P39872.2|RL3_BOVIN	5718	GO:0005840:cellular_component:ribosome	GO:0003735:molecular_function:structural constituent of ribosome	GO:0051298:biological_process:centrosome duplication	GO:0051297:biological_process:centrosome organization	GO:0000022:biological_process:mitotic spindle elongation	GO:0007052:biological_process:mitotic spindle organization	GO:0006412:biological_process:translation
Locus_22605.0|BlastHit|gi|730564|sp|P39872.2|RL3_BOVIN	5719	GO:0005730:cellular_component:nucleolus	GO:0005840:cellular_component:ribosome	GO:0003735:molecular_function:structural constituent of ribosome	GO:0006412:biological_process:translation
Locus_22605.0|BlastHit|gi|730564|sp|P39872.2|RL3_BOVIN	5719	GO:0005840:cellular_component:ribosome	GO:0003735:molecular_function:structural constituent of ribosome	GO:0051298:biological_process:centrosome duplication	GO:0051297:biological_process:centrosome organization	GO:0000022:biological_process:mitotic spindle elongation	GO:0007052:biological_process:mitotic spindle organization	GO:0006412:biological_process:translation
Locus_22620.0|BlastHit|gi|110825729|sp|P05661.4|MYSA_DROME	5723	GO:0031672:cellular_component:A band	GO:0016459:cellular_component:myosin complex	GO:0032982:cellular_component:myosin filament	GO:0005703:cellular_component:polytene chromosome puff	GO:0030017:cellular_component:sarcomere	GO:0030898:molecular_function:actin-dependent ATPase activity	GO:0005524:molecular_function:ATP binding	GO:0042623:molecular_function:ATPase activity, coupled	GO:0003774:molecular_function:motor activity	GO:0042803:molecular_function:protein homodimerization activity	GO:0008307:molecular_function:structural constituent of muscle	GO:0007527:biological_process:adult somatic muscle development	GO:0006200:biological_process:ATP catabolic process	GO:0007298:biological_process:border follicle cell migration	GO:0007427:biological_process:epithelial cell migration, open tracheal system	GO:0060361:biological_process:flight	GO:0040011:biological_process:locomotion	GO:0042692:biological_process:muscle cell differentiation	GO:0006936:biological_process:muscle contraction	GO:0007517:biological_process:muscle organ development	GO:0030239:biological_process:myofibril assembly	GO:0031033:biological_process:myosin filament organization	GO:0050821:biological_process:protein stabilization	GO:0045214:biological_process:sarcomere organization	GO:0030241:biological_process:skeletal muscle myosin thick filament assembly
Locus_22620.0|BlastHit|gi|110825729|sp|P05661.4|MYSA_DROME	5727	GO:0031672:cellular_component:A band	GO:0016459:cellular_component:myosin complex	GO:0032982:cellular_component:myosin filament	GO:0005703:cellular_component:polytene chromosome puff	GO:0030017:cellular_component:sarcomere	GO:0030898:molecular_function:actin-dependent ATPase activity	GO:0005524:molecular_function:ATP binding	GO:0042623:molecular_function:ATPase activity, coupled	GO:0003774:molecular_function:motor activity	GO:0042803:molecular_function:protein homodimerization activity	GO:0008307:molecular_function:structural constituent of muscle	GO:0007527:biological_process:adult somatic muscle development	GO:0006200:biological_process:ATP catabolic process	GO:0007298:biological_process:border follicle cell migration	GO:0007427:biological_process:epithelial cell migration, open tracheal system	GO:0060361:biological_process:flight	GO:0040011:biological_process:locomotion	GO:0042692:biological_process:muscle cell differentiation	GO:0006936:biological_process:muscle contraction	GO:0007517:biological_process:muscle organ development	GO:0030239:biological_process:myofibril assembly	GO:0031033:biological_process:myosin filament organization	GO:0050821:biological_process:protein stabilization	GO:0045214:biological_process:sarcomere organization	GO:0030241:biological_process:skeletal muscle myosin thick filament assembly
Locus_22632.0|BlastHit|gi|13959572|sp|Q9VZD5.1|RT06_DROME	5737	GO:0005763:cellular_component:mitochondrial small ribosomal subunit	GO:0019843:molecular_function:rRNA binding	GO:0003735:molecular_function:structural constituent of ribosome	GO:0006412:biological_process:translation
Locus_22663.0|BlastHit|gi|1709054|sp|P54357.1|MLC2_DROME	5756	GO:0016459:cellular_component:myosin complex	GO:0016460:cellular_component:myosin II complex	GO:0031475:cellular_component:myosin V complex	GO:0031476:cellular_component:myosin VI complex	GO:0031477:cellular_component:myosin VII complex	GO:0005509:molecular_function:calcium ion binding	GO:0017022:molecular_function:myosin binding	GO:0032036:molecular_function:myosin heavy chain binding	GO:0030048:biological_process:actin filament-based movement
Locus_22665.1|BlastHit|gi|82177041|sp|Q803G5.1|SAM5A_DANRE	5761	GO:0016021:cellular_component:integral component of membrane	GO:0005741:cellular_component:mitochondrial outer membrane	GO:0001889:biological_process:liver development
Locus_22689.0|BlastHit|gi|12230175|sp|Q9VYD7.1|TIM9_DROME	5777	GO:0005743:cellular_component:mitochondrial inner membrane	GO:0046872:molecular_function:metal ion binding	GO:0015031:biological_process:protein transport
Locus_22696.0|BlastHit|gi|82178683|sp|Q5BL56.1|HMGX4_XENTR	5779	GO:0005634:cellular_component:nucleus	GO:0003677:molecular_function:DNA binding	GO:0019901:molecular_function:protein kinase binding	GO:0007275:biological_process:multicellular organismal development	GO:0030178:biological_process:negative regulation of Wnt signaling pathway	GO:0016055:biological_process:Wnt signaling pathway
Locus_22708.0|BlastHit|gi|121958854|sp|Q1HPL8.1|NDUBA_BOMMO	5790	GO:0005743:cellular_component:mitochondrial inner membrane	GO:0070469:cellular_component:respiratory chain	GO:0055114:biological_process:oxidation-reduction process
Locus_22729.0|BlastHit|gi|85542906|sp|Q5HZI9.1|S2551_MOUSE	5812	GO:0016021:cellular_component:integral component of membrane	GO:0005743:cellular_component:mitochondrial inner membrane	GO:0005739:cellular_component:mitochondrion	GO:0006810:biological_process:transport
Locus_22745.0|BlastHit|gi|47606794|sp|Q9V3J1.2|VATH_DROME	5826	GO:0005886:cellular_component:plasma membrane	GO:0033181:cellular_component:plasma membrane proton-transporting V-type ATPase complex	GO:0000221:cellular_component:vacuolar proton-transporting V-type ATPase, V1 domain	GO:0046961:molecular_function:proton-transporting ATPase activity, rotational mechanism	GO:0015991:biological_process:ATP hydrolysis coupled proton transport	GO:0008340:biological_process:determination of adult lifespan	GO:0033227:biological_process:dsRNA transport
Locus_22749.0|BlastHit|gi|82181849|sp|Q68FI3.1|DOPDA_XENLA	5829	GO:0005737:cellular_component:cytoplasm	GO:0033981:molecular_function:D-dopachrome decarboxylase activity	GO:0042438:biological_process:melanin biosynthetic process
Locus_22816.0|BlastHit|gi|75042457|sp|Q5RE70.1|INT3_PONAB	5884	GO:0005634:cellular_component:nucleus	GO:0070876:cellular_component:SOSS complex	GO:0006974:biological_process:cellular response to DNA damage stimulus	GO:0006281:biological_process:DNA repair	GO:0007093:biological_process:mitotic cell cycle checkpoint	GO:0010212:biological_process:response to ionizing radiation
Locus_22821.0|BlastHit|gi|728792|sp|P41340.1|ACT3_LIMPO	5889	GO:0005856:cellular_component:cytoskeleton	GO:0045121:cellular_component:membrane raft	GO:0005865:cellular_component:striated muscle thin filament	GO:0005524:molecular_function:ATP binding	GO:0005200:molecular_function:structural constituent of cytoskeleton	GO:0030036:biological_process:actin cytoskeleton organization
Locus_22822.0|BlastHit|gi|134095|sp|P08579.1|RU2B_HUMAN	5891	GO:0005737:cellular_component:cytoplasm	GO:0005730:cellular_component:nucleolus	GO:0005681:cellular_component:spliceosomal complex	GO:0005685:cellular_component:U1 snRNP	GO:0000166:molecular_function:nucleotide binding	GO:0044822:molecular_function:poly(A) RNA binding	GO:0003723:molecular_function:RNA binding	GO:0017069:molecular_function:snRNA binding	GO:0000398:biological_process:mRNA splicing, via spliceosome
Locus_22826.0|BlastHit|gi|71648681|sp|Q8BJM3.1|GIDRP_MOUSE	5893	GO:0000166:molecular_function:nucleotide binding
Locus_22836.0|BlastHit|gi|62901051|sp|Q9DCF9.1|SSRG_MOUSE	5896	GO:0030176:cellular_component:integral component of endoplasmic reticulum membrane	GO:0005784:cellular_component:Sec61 translocon complex	GO:0006613:biological_process:cotranslational protein targeting to membrane
Locus_22839.0|BlastHit|gi|1346058|sp|P47805.1|M1I1A_DANRE	5899	GO:0005737:cellular_component:cytoplasm	GO:0005874:cellular_component:microtubule	GO:0005634:cellular_component:nucleus
Locus_22864.0|BlastHit|gi|122144665|sp|Q17QV2.1|MON1A_BOVIN	5906	GO:0006879:biological_process:cellular iron ion homeostasis	GO:0009306:biological_process:protein secretion	GO:0015031:biological_process:protein transport
Locus_22866.0|BlastHit|gi|353558873|sp|B6VQA1.1|DIMM_DROME	5907	GO:0005737:cellular_component:cytoplasm	GO:0005634:cellular_component:nucleus	GO:0003677:molecular_function:DNA binding	GO:0030154:biological_process:cell differentiation	GO:0007275:biological_process:multicellular organismal development	GO:0046887:biological_process:positive regulation of hormone secretion	GO:0002793:biological_process:positive regulation of peptide secretion	GO:0045944:biological_process:positive regulation of transcription from RNA polymerase II promoter	GO:0006355:biological_process:regulation of transcription, DNA-templated	GO:0006351:biological_process:transcription, DNA-templated
Locus_22868.0|BlastHit|gi|1174470|sp|P46978.1|STT3A_MOUSE	5908	GO:0016021:cellular_component:integral component of membrane	GO:0016020:cellular_component:membrane	GO:0008250:cellular_component:oligosaccharyltransferase complex	GO:0004579:molecular_function:dolichyl-diphosphooligosaccharide-protein glycotransferase activity	GO:0043686:biological_process:co-translational protein modification	GO:0018279:biological_process:protein N-linked glycosylation via asparagine
Locus_22904.0|BlastHit|gi|341942182|sp|Q8CCF0.3|PRP31_MOUSE	5927	GO:0071339:cellular_component:MLL1 complex	GO:0005681:cellular_component:spliceosomal complex	GO:0046540:cellular_component:U4/U6 x U5 tri-snRNP complex	GO:0003723:molecular_function:RNA binding	GO:0000398:biological_process:mRNA splicing, via spliceosome	GO:0060041:biological_process:retina development in camera-type eye	GO:0000244:biological_process:spliceosomal tri-snRNP complex assembly
Locus_22905.0|BlastHit|gi|123894869|sp|Q2LE78.1|BTBD6_XENLA	5928	GO:0000932:cellular_component:cytoplasmic mRNA processing body
Locus_22913.0|BlastHit|gi|387935419|sp|F1N4E5.2|TOIP1_BOVIN	5936	GO:0016021:cellular_component:integral component of membrane	GO:0005637:cellular_component:nuclear inner membrane	GO:0005634:cellular_component:nucleus	GO:0001671:molecular_function:ATPase activator activity	GO:0071763:biological_process:nuclear membrane organization	GO:0032781:biological_process:positive regulation of ATPase activity	GO:0034504:biological_process:protein localization to nucleus
Locus_22923.0|BlastHit|gi|121953120|sp|Q0E959.1|RM34_DROME	5939	GO:0005739:cellular_component:mitochondrion	GO:0005840:cellular_component:ribosome	GO:0003735:molecular_function:structural constituent of ribosome	GO:0006412:biological_process:translation
Locus_22943.0|BlastHit|gi|24638220|sp|Q9CXL1.1|TM50A_MOUSE	5957	GO:0005737:cellular_component:cytoplasm	GO:0005783:cellular_component:endoplasmic reticulum	GO:0016021:cellular_component:integral component of membrane
Locus_22947.0|BlastHit|gi|75041808|sp|Q5RA02.1|XPOT_PONAB	5963	GO:0005737:cellular_component:cytoplasm	GO:0005654:cellular_component:nucleoplasm	GO:0005634:cellular_component:nucleus	GO:0000049:molecular_function:tRNA binding	GO:0006886:biological_process:intracellular protein transport	GO:0006409:biological_process:tRNA export from nucleus
Locus_22964.0|BlastHit|gi|82183742|sp|Q6GL04.1|TERA_XENTR	5967	GO:0005737:cellular_component:cytoplasm	GO:0045169:cellular_component:fusome	GO:0005811:cellular_component:lipid particle	GO:0005875:cellular_component:microtubule associated complex	GO:0031965:cellular_component:nuclear membrane	GO:0005634:cellular_component:nucleus	GO:0043186:cellular_component:P granule	GO:0005886:cellular_component:plasma membrane	GO:0000502:cellular_component:proteasome complex	GO:0005524:molecular_function:ATP binding	GO:0016787:molecular_function:hydrolase activity	GO:0006200:biological_process:ATP catabolic process	GO:0098586:biological_process:cellular response to virus	GO:0048813:biological_process:dendrite morphogenesis	GO:0016320:biological_process:endoplasmic reticulum membrane fusion	GO:0007029:biological_process:endoplasmic reticulum organization	GO:0030433:biological_process:ER-associated ubiquitin-dependent protein catabolic process	GO:0007030:biological_process:Golgi organization	GO:0000226:biological_process:microtubule cytoskeleton organization	GO:0048477:biological_process:oogenesis	GO:0007279:biological_process:pole cell formation	GO:0043525:biological_process:positive regulation of neuron apoptotic process	GO:0032436:biological_process:positive regulation of proteasomal ubiquitin-dependent protein catabolic process	GO:0046598:biological_process:positive regulation of viral entry into host cell	GO:0006508:biological_process:proteolysis	GO:0043523:biological_process:regulation of neuron apoptotic process	GO:0007317:biological_process:regulation of pole plasm oskar mRNA localization	GO:0006810:biological_process:transport	GO:0006511:biological_process:ubiquitin-dependent protein catabolic process
Locus_22982.0|BlastHit|gi|20140087|sp|Q90XD2.1|SPEB_CHICK	5979	GO:0070062:cellular_component:extracellular vesicular exosome	GO:0005739:cellular_component:mitochondrion	GO:0008783:molecular_function:agmatinase activity	GO:0046872:molecular_function:metal ion binding	GO:0033388:biological_process:putrescine biosynthetic process from arginine	GO:0008295:biological_process:spermidine biosynthetic process
Locus_23002.0|BlastHit|gi|60390935|sp|Q7Z5L0.1|VMO1_HUMAN	5994	GO:0070062:cellular_component:extracellular vesicular exosome
Locus_23019.1|BlastHit|gi|76363525|sp|P83501.2|MSTAB_DROME	6006	GO:0042826:molecular_function:histone deacetylase binding	GO:0008168:molecular_function:methyltransferase activity	GO:0010629:biological_process:negative regulation of gene expression
Locus_23029.0|BlastHit|gi|74733402|sp|Q9BW72.1|HIG2A_HUMAN	6018	GO:0016021:cellular_component:integral component of membrane	GO:0005743:cellular_component:mitochondrial inner membrane	GO:0070469:cellular_component:respiratory chain	GO:0043066:biological_process:negative regulation of apoptotic process	GO:0055114:biological_process:oxidation-reduction process
Locus_23041.0|BlastHit|gi|81878771|sp|Q8R0J7.1|VP37B_MOUSE	6024	GO:0010008:cellular_component:endosome membrane	GO:0000813:cellular_component:ESCRT I complex	GO:0070062:cellular_component:extracellular vesicular exosome	GO:0031902:cellular_component:late endosome membrane	GO:0030496:cellular_component:midbody	GO:0016197:biological_process:endosomal transport	GO:0075733:biological_process:intracellular transport of virus	GO:0061024:biological_process:membrane organization	GO:0015031:biological_process:protein transport	GO:0019058:biological_process:viral life cycle	GO:0016032:biological_process:viral process	GO:0019082:biological_process:viral protein processing	GO:0019068:biological_process:virion assembly
Locus_23049.0|BlastHit|gi|160016019|sp|A4IIY1.1|R144A_XENTR	6039	GO:0016021:cellular_component:integral component of membrane	GO:0016874:molecular_function:ligase activity	GO:0008270:molecular_function:zinc ion binding	GO:0016567:biological_process:protein ubiquitination
Locus_23054.1|BlastHit|gi|1717869|sp|P45974.2|UBP5_HUMAN	6043	GO:0005764:cellular_component:lysosome	GO:0004197:molecular_function:cysteine-type endopeptidase activity	GO:0008242:molecular_function:omega peptidase activity	GO:0004221:molecular_function:ubiquitin thiolesterase activity	GO:0008270:molecular_function:zinc ion binding	GO:0032436:biological_process:positive regulation of proteasomal ubiquitin-dependent protein catabolic process	GO:0071108:biological_process:protein K48-linked deubiquitination	GO:0006511:biological_process:ubiquitin-dependent protein catabolic process
Locus_23077.1|BlastHit|gi|56749455|sp|O01159.3|RSP7_CAEEL	6059	GO:0005634:cellular_component:nucleus	GO:0000166:molecular_function:nucleotide binding	GO:0003723:molecular_function:RNA binding	GO:0000398:biological_process:mRNA splicing, via spliceosome
Locus_23118.0|BlastHit|gi|26006755|sp|Q26061.1|FRI_PACLE	6084	GO:0005737:cellular_component:cytoplasm	GO:0008199:molecular_function:ferric iron binding	GO:0004322:molecular_function:ferroxidase activity	GO:0006879:biological_process:cellular iron ion homeostasis	GO:0006826:biological_process:iron ion transport
Locus_23131.0|BlastHit|gi|3915086|sp|Q25008.1|TBA1_HOMAM	6090	GO:0005737:cellular_component:cytoplasm	GO:0005874:cellular_component:microtubule	GO:0005525:molecular_function:GTP binding	GO:0003924:molecular_function:GTPase activity	GO:0005200:molecular_function:structural constituent of cytoskeleton	GO:0007017:biological_process:microtubule-based process	GO:0051258:biological_process:protein polymerization
Locus_23146.0|BlastHit|gi|81883342|sp|Q5RJR2.1|TWF1_RAT	6099	GO:0015629:cellular_component:actin cytoskeleton	GO:0005911:cellular_component:cell-cell junction	GO:0030175:cellular_component:filopodium	GO:0030016:cellular_component:myofibril	GO:0048471:cellular_component:perinuclear region of cytoplasm	GO:0032587:cellular_component:ruffle membrane	GO:0005524:molecular_function:ATP binding	GO:0005546:molecular_function:phosphatidylinositol-4,5-bisphosphate binding	GO:0004713:molecular_function:protein tyrosine kinase activity	GO:0051016:biological_process:barbed-end actin filament capping	GO:0043538:biological_process:regulation of actin phosphorylation	GO:0042989:biological_process:sequestering of actin monomers
Locus_23148.0|BlastHit|gi|1168849|sp|P41731.2|CD63_MOUSE	6101	GO:0005737:cellular_component:cytoplasm	GO:0016021:cellular_component:integral component of membrane	GO:0031226:cellular_component:intrinsic component of plasma membrane	GO:0031902:cellular_component:late endosome membrane	GO:0005765:cellular_component:lysosomal membrane	GO:0005764:cellular_component:lysosome	GO:0042470:cellular_component:melanosome	GO:0097487:cellular_component:multivesicular body, internal vesicle	GO:0005886:cellular_component:plasma membrane	GO:0043234:cellular_component:protein complex	GO:0030658:cellular_component:transport vesicle membrane	GO:0032403:molecular_function:protein complex binding	GO:0016477:biological_process:cell migration	GO:0007160:biological_process:cell-matrix adhesion	GO:0035646:biological_process:endosome to melanosome transport	GO:0030855:biological_process:epithelial cell differentiation	GO:0010633:biological_process:negative regulation of epithelial cell migration	GO:0048757:biological_process:pigment granule maturation	GO:0045785:biological_process:positive regulation of cell adhesion	GO:0045807:biological_process:positive regulation of endocytosis	GO:2001046:biological_process:positive regulation of integrin-mediated signaling pathway	GO:0002092:biological_process:positive regulation of receptor internalization	GO:0015031:biological_process:protein transport	GO:1900746:biological_process:regulation of vascular endothelial growth factor signaling pathway
Locus_23157.0|BlastHit|gi|10720057|sp|Q9VAS7.1|INX3_DROME	6108	GO:0016327:cellular_component:apicolateral plasma membrane	GO:0005737:cellular_component:cytoplasm	GO:0005921:cellular_component:gap junction	GO:0016021:cellular_component:integral component of membrane	GO:0016328:cellular_component:lateral plasma membrane	GO:0005886:cellular_component:plasma membrane	GO:0005243:molecular_function:gap junction channel activity	GO:0007391:biological_process:dorsal closure	GO:0010496:biological_process:intercellular transport	GO:0006811:biological_process:ion transport	GO:0055085:biological_process:transmembrane transport
Locus_23175.0|BlastHit|gi|172048426|sp|A9ULE9.1|DJC22_XENTR	6123	GO:0016021:cellular_component:integral component of membrane
Locus_23181.0|BlastHit|gi|205831550|sp|Q03168.2|ASPP_AEDAE	6127	GO:0005764:cellular_component:lysosome	GO:0004190:molecular_function:aspartic-type endopeptidase activity
Locus_23196.0|BlastHit|gi|24638458|sp|P49593.3|PPM1F_HUMAN	6154	GO:0005829:cellular_component:cytosol	GO:0048471:cellular_component:perinuclear region of cytoplasm	GO:0043234:cellular_component:protein complex	GO:0033192:molecular_function:calmodulin-dependent protein phosphatase activity	GO:0046872:molecular_function:metal ion binding	GO:0016791:molecular_function:phosphatase activity	GO:0004722:molecular_function:protein serine/threonine phosphatase activity	GO:0035690:biological_process:cellular response to drug	GO:0016576:biological_process:histone dephosphorylation	GO:0097193:biological_process:intrinsic apoptotic signaling pathway	GO:0033137:biological_process:negative regulation of peptidyl-serine phosphorylation	GO:0006469:biological_process:negative regulation of protein kinase activity	GO:0044387:biological_process:negative regulation of protein kinase activity by regulation of protein phosphorylation	GO:0045892:biological_process:negative regulation of transcription, DNA-templated	GO:0035970:biological_process:peptidyl-threonine dephosphorylation	GO:0010811:biological_process:positive regulation of cell-substrate adhesion	GO:0050921:biological_process:positive regulation of chemotaxis	GO:0043280:biological_process:positive regulation of cysteine-type endopeptidase activity involved in apoptotic process	GO:0010634:biological_process:positive regulation of epithelial cell migration	GO:0051894:biological_process:positive regulation of focal adhesion assembly	GO:0010628:biological_process:positive regulation of gene expression	GO:0045927:biological_process:positive regulation of growth	GO:0051496:biological_process:positive regulation of stress fiber assembly
Locus_23210.0|BlastHit|gi|55976220|sp|O88543.3|CSN3_MOUSE	6158	GO:0008180:cellular_component:COP9 signalosome	GO:0005737:cellular_component:cytoplasm	GO:0010388:biological_process:cullin deneddylation	GO:0001701:biological_process:in utero embryonic development
Locus_23217.0|BlastHit|gi|122137113|sp|Q2TBX5.1|SSRD_BOVIN	6168	GO:0005789:cellular_component:endoplasmic reticulum membrane	GO:0070062:cellular_component:extracellular vesicular exosome	GO:0016021:cellular_component:integral component of membrane
Locus_23220.0|BlastHit|gi|73620981|sp|P12252.4|PDE4B_DROME	6169	GO:0004114:molecular_function:3',5'-cyclic-nucleotide phosphodiesterase activity	GO:0046872:molecular_function:metal ion binding	GO:0008306:biological_process:associative learning	GO:0048675:biological_process:axon extension	GO:0048149:biological_process:behavioral response to ethanol	GO:0006198:biological_process:cAMP catabolic process	GO:0019933:biological_process:cAMP-mediated signaling	GO:0007623:biological_process:circadian rhythm	GO:0001661:biological_process:conditioned taste aversion	GO:0007619:biological_process:courtship behavior	GO:0046331:biological_process:lateral inhibition	GO:0007612:biological_process:learning	GO:0007611:biological_process:learning or memory	GO:0045475:biological_process:locomotor rhythm	GO:0007617:biological_process:mating behavior	GO:0007613:biological_process:memory	GO:0046958:biological_process:nonassociative learning	GO:0008355:biological_process:olfactory learning	GO:0048477:biological_process:oogenesis	GO:0010738:biological_process:regulation of protein kinase A signaling	GO:0000003:biological_process:reproduction	GO:0007614:biological_process:short-term memory	GO:0007268:biological_process:synaptic transmission	GO:0040040:biological_process:thermosensory behavior
Locus_23229.0|BlastHit|gi|112987|sp|P00507.2|AATM_RAT	6172	GO:0009986:cellular_component:cell surface	GO:0005743:cellular_component:mitochondrial inner membrane	GO:0005759:cellular_component:mitochondrial matrix	GO:0005739:cellular_component:mitochondrion	GO:0043204:cellular_component:perikaryon	GO:0005886:cellular_component:plasma membrane	GO:0043234:cellular_component:protein complex	GO:0016597:molecular_function:amino acid binding	GO:0031406:molecular_function:carboxylic acid binding	GO:0019899:molecular_function:enzyme binding	GO:0016212:molecular_function:kynurenine-oxoglutarate transaminase activity	GO:0004069:molecular_function:L-aspartate:2-oxoglutarate aminotransferase activity	GO:0080130:molecular_function:L-phenylalanine:2-oxoglutarate aminotransferase activity	GO:0005543:molecular_function:phospholipid binding	GO:0042803:molecular_function:protein homodimerization activity	GO:0030170:molecular_function:pyridoxal phosphate binding	GO:0006103:biological_process:2-oxoglutarate metabolic process	GO:0006531:biological_process:aspartate metabolic process	GO:0009058:biological_process:biosynthetic process	GO:0006520:biological_process:cellular amino acid metabolic process	GO:0043648:biological_process:dicarboxylic acid metabolic process	GO:0015908:biological_process:fatty acid transport	GO:0006536:biological_process:glutamate metabolic process
Locus_23232.0|BlastHit|gi|75042307|sp|Q5RDB5.1|CNIH_PONAB	6173	GO:0005789:cellular_component:endoplasmic reticulum membrane	GO:0016021:cellular_component:integral component of membrane	GO:0009952:biological_process:anterior/posterior pattern specification	GO:0045450:biological_process:bicoid mRNA localization	GO:0007350:biological_process:blastoderm segmentation	GO:0046843:biological_process:dorsal appendage formation	GO:0009953:biological_process:dorsal/ventral pattern formation	GO:0006888:biological_process:ER to Golgi vesicle-mediated transport	GO:0030722:biological_process:establishment of oocyte nucleus localization involved in oocyte dorsal/ventral axis specification	GO:0008314:biological_process:gurken signaling pathway	GO:0008298:biological_process:intracellular mRNA localization	GO:0035556:biological_process:intracellular signal transduction	GO:0007314:biological_process:oocyte anterior/posterior axis specification	GO:0007310:biological_process:oocyte dorsal/ventral axis specification	GO:0045451:biological_process:pole plasm oskar mRNA localization	GO:0015031:biological_process:protein transport	GO:0016192:biological_process:vesicle-mediated transport
Locus_23235.0|BlastHit|gi|110825729|sp|P05661.4|MYSA_DROME	6177	GO:0031672:cellular_component:A band	GO:0016459:cellular_component:myosin complex	GO:0032982:cellular_component:myosin filament	GO:0005703:cellular_component:polytene chromosome puff	GO:0030017:cellular_component:sarcomere	GO:0030898:molecular_function:actin-dependent ATPase activity	GO:0005524:molecular_function:ATP binding	GO:0042623:molecular_function:ATPase activity, coupled	GO:0003774:molecular_function:motor activity	GO:0042803:molecular_function:protein homodimerization activity	GO:0008307:molecular_function:structural constituent of muscle	GO:0007527:biological_process:adult somatic muscle development	GO:0006200:biological_process:ATP catabolic process	GO:0007298:biological_process:border follicle cell migration	GO:0007427:biological_process:epithelial cell migration, open tracheal system	GO:0060361:biological_process:flight	GO:0040011:biological_process:locomotion	GO:0042692:biological_process:muscle cell differentiation	GO:0006936:biological_process:muscle contraction	GO:0007517:biological_process:muscle organ development	GO:0030239:biological_process:myofibril assembly	GO:0031033:biological_process:myosin filament organization	GO:0050821:biological_process:protein stabilization	GO:0045214:biological_process:sarcomere organization	GO:0030241:biological_process:skeletal muscle myosin thick filament assembly
Locus_23254.0|BlastHit|gi|81904267|sp|Q9CX11.1|UTP23_MOUSE	6186	GO:0005730:cellular_component:nucleolus	GO:0032040:cellular_component:small-subunit processome	GO:0044822:molecular_function:poly(A) RNA binding	GO:0006364:biological_process:rRNA processing
Locus_23255.0|BlastHit|gi|74868306|sp|Q9VCC3.1|RT24_DROME	6187	GO:0005762:cellular_component:mitochondrial large ribosomal subunit	GO:0005763:cellular_component:mitochondrial small ribosomal subunit	GO:0003735:molecular_function:structural constituent of ribosome	GO:0006412:biological_process:translation
Locus_23259.0|BlastHit|gi|9087114|sp|O08918.3|CCNG2_MOUSE	6189	GO:0005737:cellular_component:cytoplasm	GO:0005634:cellular_component:nucleus	GO:0007067:biological_process:mitotic nuclear division	GO:0051726:biological_process:regulation of cell cycle
Locus_23268.0|BlastHit|gi|259016458|sp|Q14593.3|ZN273_HUMAN	6200	GO:0005634:cellular_component:nucleus	GO:0003677:molecular_function:DNA binding	GO:0046872:molecular_function:metal ion binding	GO:0006355:biological_process:regulation of transcription, DNA-templated	GO:0006351:biological_process:transcription, DNA-templated
Locus_23280.0|BlastHit|gi|50400685|sp|Q9TSM5.3|GSTM1_MACFA	6212	GO:0005737:cellular_component:cytoplasm	GO:0004364:molecular_function:glutathione transferase activity
Locus_23282.1|BlastHit|gi|46395848|sp|Q8CG64.1|FKRP_MOUSE	6214	GO:0005615:cellular_component:extracellular space	GO:0005794:cellular_component:Golgi apparatus	GO:0000139:cellular_component:Golgi membrane	GO:0016021:cellular_component:integral component of membrane	GO:0005791:cellular_component:rough endoplasmic reticulum	GO:0042383:cellular_component:sarcolemma	GO:0016740:molecular_function:transferase activity	GO:0009101:biological_process:glycoprotein biosynthetic process	GO:0016485:biological_process:protein processing
Locus_23288.0|BlastHit|gi|52000827|sp|Q8HXG6.3|NDUAB_BOVIN	6217	GO:0016021:cellular_component:integral component of membrane	GO:0005743:cellular_component:mitochondrial inner membrane	GO:0005739:cellular_component:mitochondrion	GO:0070469:cellular_component:respiratory chain	GO:0055114:biological_process:oxidation-reduction process
Locus_23296.0|BlastHit|gi|62906874|sp|Q13685.2|AAMP_HUMAN	6241	GO:0009986:cellular_component:cell surface	GO:0005737:cellular_component:cytoplasm	GO:0005886:cellular_component:plasma membrane	GO:0008201:molecular_function:heparin binding	GO:0001525:biological_process:angiogenesis	GO:0030154:biological_process:cell differentiation	GO:0010595:biological_process:positive regulation of endothelial cell migration	GO:0014909:biological_process:smooth muscle cell migration
Locus_23313.0|BlastHit|gi|12644421|sp|Q24214.2|CANB2_DROME	6252	GO:0005955:cellular_component:calcineurin complex	GO:0008021:cellular_component:synaptic vesicle	GO:0005509:molecular_function:calcium ion binding	GO:0008597:molecular_function:calcium-dependent protein serine/threonine phosphatase regulator activity	GO:0005516:molecular_function:calmodulin binding	GO:0007126:biological_process:meiotic nuclear division	GO:0007269:biological_process:neurotransmitter secretion	GO:0006470:biological_process:protein dephosphorylation	GO:0050790:biological_process:regulation of catalytic activity	GO:0045214:biological_process:sarcomere organization	GO:0030241:biological_process:skeletal muscle myosin thick filament assembly	GO:0030431:biological_process:sleep	GO:0016192:biological_process:vesicle-mediated transport
Locus_23315.0|BlastHit|gi|6919838|sp|Q9X248.1|FABG_THEMA	6253	GO:0004316:molecular_function:3-oxoacyl-[acyl-carrier-protein] reductase (NADPH) activity	GO:0051287:molecular_function:NAD binding	GO:0050661:molecular_function:NADP binding	GO:0030497:biological_process:fatty acid elongation
Locus_23317.0|BlastHit|gi|47117852|sp|P46718.2|PDCD2_MOUSE	6254	GO:0005737:cellular_component:cytoplasm	GO:0070062:cellular_component:extracellular vesicular exosome	GO:0005634:cellular_component:nucleus	GO:0003677:molecular_function:DNA binding	GO:0046872:molecular_function:metal ion binding	GO:0006915:biological_process:apoptotic process
Locus_23327.0|BlastHit|gi|51701863|sp|Q9V3H2.1|PSDE_DROME	6257	GO:0005875:cellular_component:microtubule associated complex	GO:0005838:cellular_component:proteasome regulatory particle	GO:0008541:cellular_component:proteasome regulatory particle, lid subcomplex	GO:0046872:molecular_function:metal ion binding	GO:0008237:molecular_function:metallopeptidase activity	GO:0009987:biological_process:cellular process	GO:0032436:biological_process:positive regulation of proteasomal ubiquitin-dependent protein catabolic process	GO:0043161:biological_process:proteasome-mediated ubiquitin-dependent protein catabolic process	GO:0006508:biological_process:proteolysis
Locus_23327.0|BlastHit|gi|51701863|sp|Q9V3H2.1|PSDE_DROME	6257	GO:0034451:cellular_component:centriolar satellite	GO:0005814:cellular_component:centriole	GO:0005929:cellular_component:cilium	GO:0061511:biological_process:centriole elongation	GO:0035058:biological_process:nonmotile primary cilium assembly	GO:0071539:biological_process:protein localization to centrosome
Locus_23328.0|BlastHit|gi|47606778|sp|P80601.3|UK114_CAPHI	6258	GO:0009986:cellular_component:cell surface	GO:0019239:molecular_function:deaminase activity	GO:0004519:molecular_function:endonuclease activity
Locus_23334.0|BlastHit|gi|130859|sp|P25788.2|PSA3_HUMAN	6261	GO:0005737:cellular_component:cytoplasm	GO:0005829:cellular_component:cytosol	GO:0070062:cellular_component:extracellular vesicular exosome	GO:0005654:cellular_component:nucleoplasm	GO:0005634:cellular_component:nucleus	GO:0000502:cellular_component:proteasome complex	GO:0005839:cellular_component:proteasome core complex	GO:0019773:cellular_component:proteasome core complex, alpha-subunit complex	GO:0004298:molecular_function:threonine-type endopeptidase activity	GO:0031145:biological_process:anaphase-promoting complex-dependent proteasomal ubiquitin-dependent protein catabolic process	GO:0042590:biological_process:antigen processing and presentation of exogenous peptide antigen via MHC class I	GO:0002479:biological_process:antigen processing and presentation of exogenous peptide antigen via MHC class I, TAP-dependent	GO:0002474:biological_process:antigen processing and presentation of peptide antigen via MHC class I	GO:0006915:biological_process:apoptotic process	GO:0034641:biological_process:cellular nitrogen compound metabolic process	GO:0006977:biological_process:DNA damage response, signal transduction by p53 class mediator resulting in cell cycle arrest	GO:0000082:biological_process:G1/S transition of mitotic cell cycle	GO:0010467:biological_process:gene expression	GO:0000278:biological_process:mitotic cell cycle	GO:0016071:biological_process:mRNA metabolic process	GO:0043066:biological_process:negative regulation of apoptotic process	GO:0051436:biological_process:negative regulation of ubiquitin-protein ligase activity involved in mitotic cell cycle	GO:0051437:biological_process:positive regulation of ubiquitin-protein ligase activity involved in regulation of mitotic cell cycle transition	GO:0000209:biological_process:protein polyubiquitination	GO:0042981:biological_process:regulation of apoptotic process	GO:0006521:biological_process:regulation of cellular amino acid metabolic process	GO:0051439:biological_process:regulation of ubiquitin-protein ligase activity involved in mitotic cell cycle	GO:0016070:biological_process:RNA metabolic process	GO:0044281:biological_process:small molecule metabolic process	GO:0016032:biological_process:viral process
Locus_23347.0|BlastHit|gi|116242812|sp|P29083.2|T2EA_HUMAN	6265	GO:0045111:cellular_component:intermediate filament cytoskeleton	GO:0005654:cellular_component:nucleoplasm	GO:0005634:cellular_component:nucleus	GO:0046872:molecular_function:metal ion binding	GO:0043565:molecular_function:sequence-specific DNA binding	GO:0010467:biological_process:gene expression	GO:0006355:biological_process:regulation of transcription, DNA-templated	GO:0006368:biological_process:transcription elongation from RNA polymerase II promoter	GO:0006366:biological_process:transcription from RNA polymerase II promoter	GO:0006367:biological_process:transcription initiation from RNA polymerase II promoter	GO:0016032:biological_process:viral process
Locus_23350.0|BlastHit|gi|341941188|sp|Q99LH1.2|NOG2_MOUSE	6266	GO:0016020:cellular_component:membrane	GO:0005730:cellular_component:nucleolus	GO:0005525:molecular_function:GTP binding	GO:0003924:molecular_function:GTPase activity	GO:0044822:molecular_function:poly(A) RNA binding	GO:0006184:biological_process:GTP catabolic process	GO:0042254:biological_process:ribosome biogenesis
Locus_23367.0|BlastHit|gi|13431855|sp|P97281.1|SGCD_MESAU	6274	GO:0005737:cellular_component:cytoplasm	GO:0005856:cellular_component:cytoskeleton	GO:0016021:cellular_component:integral component of membrane	GO:0016012:cellular_component:sarcoglycan complex	GO:0042383:cellular_component:sarcolemma
Locus_23428.0|BlastHit|gi|134035378|sp|Q8IUS5.2|EPHX4_HUMAN	6323	GO:0016021:cellular_component:integral component of membrane	GO:0016787:molecular_function:hydrolase activity
Locus_23454.0|BlastHit|gi|88909244|sp|P84173.1|PHB_CHICK	6345	GO:0005737:cellular_component:cytoplasm	GO:0005811:cellular_component:lipid particle	GO:0016020:cellular_component:membrane	GO:0005875:cellular_component:microtubule associated complex	GO:0005739:cellular_component:mitochondrion	GO:0071456:biological_process:cellular response to hypoxia	GO:0007275:biological_process:multicellular organismal development
Locus_23468.0|BlastHit|gi|82084052|sp|Q66XS7.1|NDUS4_GECJA	6361	GO:0005743:cellular_component:mitochondrial inner membrane	GO:0005747:cellular_component:mitochondrial respiratory chain complex I	GO:0005739:cellular_component:mitochondrion	GO:0008137:molecular_function:NADH dehydrogenase (ubiquinone) activity	GO:0007420:biological_process:brain development	GO:0019933:biological_process:cAMP-mediated signaling	GO:0044237:biological_process:cellular metabolic process	GO:0045333:biological_process:cellular respiration	GO:0006120:biological_process:mitochondrial electron transport, NADH to ubiquinone	GO:0032981:biological_process:mitochondrial respiratory chain complex I assembly	GO:0048146:biological_process:positive regulation of fibroblast proliferation	GO:0072593:biological_process:reactive oxygen species metabolic process	GO:0001932:biological_process:regulation of protein phosphorylation	GO:0022904:biological_process:respiratory electron transport chain	GO:0051591:biological_process:response to cAMP	GO:0044281:biological_process:small molecule metabolic process
Locus_23480.0|BlastHit|gi|148886601|sp|Q502L2.2|PGAM5_DANRE	6367	GO:0016021:cellular_component:integral component of membrane	GO:0005741:cellular_component:mitochondrial outer membrane	GO:0005096:molecular_function:GTPase activator activity	GO:0016791:molecular_function:phosphatase activity	GO:0004721:molecular_function:phosphoprotein phosphatase activity	GO:0016311:biological_process:dephosphorylation	GO:0070266:biological_process:necroptotic process	GO:0043547:biological_process:positive regulation of GTPase activity
Locus_23482.0|BlastHit|gi|229462993|sp|Q9VEG6.3|PERC_DROME	6368	GO:0005615:cellular_component:extracellular space	GO:0005875:cellular_component:microtubule associated complex	GO:0020037:molecular_function:heme binding	GO:0046872:molecular_function:metal ion binding	GO:0004601:molecular_function:peroxidase activity	GO:0004666:molecular_function:prostaglandin-endoperoxide synthase activity	GO:0007304:biological_process:chorion-containing eggshell formation	GO:0007306:biological_process:eggshell chorion assembly	GO:0042744:biological_process:hydrogen peroxide catabolic process	GO:0042743:biological_process:hydrogen peroxide metabolic process	GO:0030707:biological_process:ovarian follicle cell development	GO:0001516:biological_process:prostaglandin biosynthetic process
Locus_23483.0|BlastHit|gi|122069625|sp|Q2TBS2.1|RM21_BOVIN	6369	GO:0005739:cellular_component:mitochondrion	GO:0005840:cellular_component:ribosome
Locus_23494.0|BlastHit|gi|134312|sp|P02636.1|SCPA_PENSP	6379	GO:0005509:molecular_function:calcium ion binding
Locus_23494.0|BlastHit|gi|134312|sp|P02636.1|SCPA_PENSP	6379	GO:0005634:cellular_component:nucleus	GO:0005674:cellular_component:transcription factor TFIIF complex	GO:0003677:molecular_function:DNA binding	GO:0001096:molecular_function:TFIIF-class transcription factor binding	GO:0016740:molecular_function:transferase activity	GO:0022008:biological_process:neurogenesis	GO:0032968:biological_process:positive regulation of transcription elongation from RNA polymerase II promoter	GO:0045944:biological_process:positive regulation of transcription from RNA polymerase II promoter	GO:0060261:biological_process:positive regulation of transcription initiation from RNA polymerase II promoter	GO:0006367:biological_process:transcription initiation from RNA polymerase II promoter
Locus_23494.0|BlastHit|gi|134312|sp|P02636.1|SCPA_PENSP	6381	GO:0005509:molecular_function:calcium ion binding
Locus_23494.0|BlastHit|gi|134312|sp|P02636.1|SCPA_PENSP	6381	GO:0005634:cellular_component:nucleus	GO:0005674:cellular_component:transcription factor TFIIF complex	GO:0003677:molecular_function:DNA binding	GO:0001096:molecular_function:TFIIF-class transcription factor binding	GO:0016740:molecular_function:transferase activity	GO:0022008:biological_process:neurogenesis	GO:0032968:biological_process:positive regulation of transcription elongation from RNA polymerase II promoter	GO:0045944:biological_process:positive regulation of transcription from RNA polymerase II promoter	GO:0060261:biological_process:positive regulation of transcription initiation from RNA polymerase II promoter	GO:0006367:biological_process:transcription initiation from RNA polymerase II promoter
Locus_23495.0|BlastHit|gi|122125964|sp|Q4N4N8.1|TXND_THEPA	6382	GO:0005789:cellular_component:endoplasmic reticulum membrane	GO:0016021:cellular_component:integral component of membrane	GO:0045454:biological_process:cell redox homeostasis
Locus_23526.0|BlastHit|gi|81883151|sp|Q5M954.1|SEN2_RAT	6404	GO:0005813:cellular_component:centrosome	GO:0005737:cellular_component:cytoplasm	GO:0005730:cellular_component:nucleolus	GO:0000214:cellular_component:tRNA-intron endonuclease complex	GO:0016829:molecular_function:lyase activity	GO:0003676:molecular_function:nucleic acid binding	GO:0000213:molecular_function:tRNA-intron endonuclease activity	GO:0006397:biological_process:mRNA processing	GO:0006388:biological_process:tRNA splicing, via endonucleolytic cleavage and ligation
Locus_23547.0|BlastHit|gi|75058087|sp|Q7YR75.1|RM12_BOVIN	6417	GO:0005762:cellular_component:mitochondrial large ribosomal subunit	GO:0003735:molecular_function:structural constituent of ribosome	GO:0006412:biological_process:translation
Locus_23550.0|BlastHit|gi|38257658|sp|Q8MZC4.1|CRLS1_DROME	6418	GO:0016021:cellular_component:integral component of membrane	GO:0005743:cellular_component:mitochondrial inner membrane	GO:0008808:molecular_function:cardiolipin synthase activity	GO:0006754:biological_process:ATP biosynthetic process	GO:0007006:biological_process:mitochondrial membrane organization	GO:0008654:biological_process:phospholipid biosynthetic process
Locus_23556.0|BlastHit|gi|1703454|sp|P07584.2|ASTA_ASTFL	6426	GO:0060473:cellular_component:cortical granule	GO:0005737:cellular_component:cytoplasm	GO:0005886:cellular_component:plasma membrane	GO:0070001:molecular_function:aspartic-type peptidase activity	GO:0070002:molecular_function:glutamic-type peptidase activity	GO:0004222:molecular_function:metalloendopeptidase activity	GO:0008233:molecular_function:peptidase activity	GO:0008270:molecular_function:zinc ion binding	GO:0007155:biological_process:cell adhesion	GO:0009566:biological_process:fertilization	GO:2000360:biological_process:negative regulation of binding of sperm to zona pellucida	GO:0010954:biological_process:positive regulation of protein processing	GO:0060468:biological_process:prevention of polyspermy
Locus_23556.0|BlastHit|gi|1703454|sp|P07584.2|ASTA_ASTFL	6430	GO:0060473:cellular_component:cortical granule	GO:0005737:cellular_component:cytoplasm	GO:0005886:cellular_component:plasma membrane	GO:0070001:molecular_function:aspartic-type peptidase activity	GO:0070002:molecular_function:glutamic-type peptidase activity	GO:0004222:molecular_function:metalloendopeptidase activity	GO:0008233:molecular_function:peptidase activity	GO:0008270:molecular_function:zinc ion binding	GO:0007155:biological_process:cell adhesion	GO:0009566:biological_process:fertilization	GO:2000360:biological_process:negative regulation of binding of sperm to zona pellucida	GO:0010954:biological_process:positive regulation of protein processing	GO:0060468:biological_process:prevention of polyspermy
Locus_23566.0|BlastHit|gi|224488019|sp|B5DGH9.1|EIF3E_SALSA	6437	GO:0016282:cellular_component:eukaryotic 43S preinitiation complex	GO:0033290:cellular_component:eukaryotic 48S preinitiation complex	GO:0005852:cellular_component:eukaryotic translation initiation factor 3 complex	GO:0005634:cellular_component:nucleus	GO:0003743:molecular_function:translation initiation factor activity	GO:0001731:biological_process:formation of translation preinitiation complex	GO:0006446:biological_process:regulation of translational initiation	GO:0006413:biological_process:translational initiation
Locus_23568.0|BlastHit|gi|73917775|sp|Q503V0.3|CHMP6_DANRE	6439	GO:0070062:cellular_component:extracellular vesicular exosome	GO:0031902:cellular_component:late endosome membrane	GO:0015031:biological_process:protein transport
Locus_23587.0|BlastHit|gi|123900566|sp|Q3KRG3.1|TSR2_DANRE	6453	GO:0006364:biological_process:rRNA processing
Locus_23589.0|BlastHit|gi|148877250|sp|Q9FKK7.2|XYLA_ARATH	6454	GO:0005783:cellular_component:endoplasmic reticulum	GO:0005794:cellular_component:Golgi apparatus	GO:0005774:cellular_component:vacuolar membrane	GO:0005773:cellular_component:vacuole	GO:0046872:molecular_function:metal ion binding	GO:0009045:molecular_function:xylose isomerase activity	GO:0042732:biological_process:D-xylose metabolic process	GO:0006098:biological_process:pentose-phosphate shunt
Locus_23601.0|BlastHit|gi|12230174|sp|Q9VTN3.1|TIM13_DROME	6487	GO:0005743:cellular_component:mitochondrial inner membrane	GO:0046872:molecular_function:metal ion binding	GO:0015031:biological_process:protein transport
Locus_23612.0|BlastHit|gi|74947736|sp|Q9VC57.1|ATLAS_DROME	6493	GO:0005737:cellular_component:cytoplasm	GO:0012505:cellular_component:endomembrane system	GO:0005783:cellular_component:endoplasmic reticulum	GO:0005794:cellular_component:Golgi apparatus	GO:0000139:cellular_component:Golgi membrane	GO:0016021:cellular_component:integral component of membrane	GO:0031227:cellular_component:intrinsic component of endoplasmic reticulum membrane	GO:0016020:cellular_component:membrane	GO:0005525:molecular_function:GTP binding	GO:0003924:molecular_function:GTPase activity	GO:0032561:molecular_function:guanyl ribonucleotide binding	GO:0042802:molecular_function:identical protein binding	GO:0042803:molecular_function:protein homodimerization activity	GO:0016320:biological_process:endoplasmic reticulum membrane fusion	GO:0007029:biological_process:endoplasmic reticulum organization	GO:0007030:biological_process:Golgi organization	GO:0006184:biological_process:GTP catabolic process	GO:0061025:biological_process:membrane fusion	GO:0007019:biological_process:microtubule depolymerization	GO:0007517:biological_process:muscle organ development	GO:0007528:biological_process:neuromuscular junction development	GO:0051260:biological_process:protein homooligomerization	GO:0031114:biological_process:regulation of microtubule depolymerization	GO:0008582:biological_process:regulation of synaptic growth at neuromuscular junction	GO:0051124:biological_process:synaptic growth at neuromuscular junction
Locus_23614.0|BlastHit|gi|76364210|sp|Q6AXX4.1|SAS10_RAT	6494	GO:0005634:cellular_component:nucleus	GO:0003723:molecular_function:RNA binding	GO:0016568:biological_process:chromatin modification	GO:0022008:biological_process:neurogenesis
Locus_23619.0|BlastHit|gi|146345383|sp|P00920.4|CAH2_MOUSE	6495	GO:0005829:cellular_component:cytosol	GO:0004089:molecular_function:carbonate dehydratase activity	GO:0016151:molecular_function:nickel cation binding	GO:0008270:molecular_function:zinc ion binding	GO:0006730:biological_process:one-carbon metabolic process	GO:0045471:biological_process:response to ethanol	GO:0006979:biological_process:response to oxidative stress
Locus_23628.0|BlastHit|gi|223635262|sp|A7GPY2.1|KYNB_BACCN	6499	GO:0004061:molecular_function:arylformamidase activity	GO:0004328:molecular_function:formamidase activity	GO:0043420:biological_process:anthranilate metabolic process	GO:0019441:biological_process:tryptophan catabolic process to kynurenine
Locus_23651.0|BlastHit|gi|55584162|sp|P40222.3|TXLNA_HUMAN	6508	GO:0005737:cellular_component:cytoplasm	GO:0005576:cellular_component:extracellular region	GO:0016020:cellular_component:membrane	GO:0005125:molecular_function:cytokine activity	GO:0030372:molecular_function:high molecular weight B cell growth factor receptor binding	GO:0042113:biological_process:B cell activation	GO:0008283:biological_process:cell proliferation	GO:0006887:biological_process:exocytosis
Locus_23676.0|BlastHit|gi|37538019|sp|Q9P0N9.1|TBCD7_HUMAN	6524	GO:0016023:cellular_component:cytoplasmic membrane-bounded vesicle	GO:0005097:molecular_function:Rab GTPase activator activity	GO:0032862:biological_process:activation of Rho GTPase activity	GO:0032007:biological_process:negative regulation of TOR signaling	GO:0070848:biological_process:response to growth factor
Locus_23689.0|BlastHit|gi|38372258|sp|Q9VCY8.2|ADRL_DROME	6530	GO:0016021:cellular_component:integral component of membrane	GO:0005886:cellular_component:plasma membrane	GO:0042562:molecular_function:hormone binding	GO:0004872:molecular_function:receptor activity	GO:0033211:biological_process:adiponectin-activated signaling pathway	GO:0019395:biological_process:fatty acid oxidation	GO:0042593:biological_process:glucose homeostasis	GO:0009755:biological_process:hormone-mediated signaling pathway	GO:0032024:biological_process:positive regulation of insulin secretion	GO:0070328:biological_process:triglyceride homeostasis
Locus_23696.0|BlastHit|gi|17380464|sp|Q03017.2|CACT_DROME	6540	GO:0005737:cellular_component:cytoplasm	GO:0031594:cellular_component:neuromuscular junction	GO:0008134:molecular_function:transcription factor binding	GO:0019732:biological_process:antifungal humoral response	GO:0019730:biological_process:antimicrobial humoral response	GO:0006974:biological_process:cellular response to DNA damage stimulus	GO:0042994:biological_process:cytoplasmic sequestering of transcription factor	GO:0006952:biological_process:defense response	GO:0046843:biological_process:dorsal appendage formation	GO:0009950:biological_process:dorsal/ventral axis specification	GO:0030097:biological_process:hemopoiesis	GO:0006955:biological_process:immune response	GO:0045087:biological_process:innate immune response	GO:0007399:biological_process:nervous system development	GO:0048477:biological_process:oogenesis	GO:0006909:biological_process:phagocytosis	GO:0006967:biological_process:positive regulation of antifungal peptide biosynthetic process	GO:0009620:biological_process:response to fungus	GO:0008063:biological_process:Toll signaling pathway
Locus_23714.0|BlastHit|gi|75041488|sp|Q5R802.1|KANL2_PONAB	6560	GO:0000123:cellular_component:histone acetyltransferase complex	GO:0046972:molecular_function:histone acetyltransferase activity (H4-K16 specific)	GO:0043995:molecular_function:histone acetyltransferase activity (H4-K5 specific)	GO:0043996:molecular_function:histone acetyltransferase activity (H4-K8 specific)	GO:0043984:biological_process:histone H4-K16 acetylation	GO:0043981:biological_process:histone H4-K5 acetylation	GO:0043982:biological_process:histone H4-K8 acetylation
Locus_23732.0|BlastHit|gi|5902742|sp|P79896.1|ADHX_SPAAU	6566	GO:0005737:cellular_component:cytoplasm	GO:0004022:molecular_function:alcohol dehydrogenase (NAD) activity	GO:0051903:molecular_function:S-(hydroxymethyl)glutathione dehydrogenase activity	GO:0008270:molecular_function:zinc ion binding	GO:0006069:biological_process:ethanol oxidation
Locus_23732.0|BlastHit|gi|5902742|sp|P79896.1|ADHX_SPAAU	6567	GO:0005737:cellular_component:cytoplasm	GO:0004022:molecular_function:alcohol dehydrogenase (NAD) activity	GO:0051903:molecular_function:S-(hydroxymethyl)glutathione dehydrogenase activity	GO:0008270:molecular_function:zinc ion binding	GO:0006069:biological_process:ethanol oxidation
Locus_23738.0|BlastHit|gi|33301416|sp|Q9D0S4.1|NEUL2_MOUSE	6570	GO:0005927:cellular_component:muscle tendon junction	GO:0030891:cellular_component:VCB complex	GO:0035556:biological_process:intracellular signal transduction	GO:0030239:biological_process:myofibril assembly	GO:0016567:biological_process:protein ubiquitination	GO:0045214:biological_process:sarcomere organization
Locus_23744.0|BlastHit|gi|62510825|sp|Q94901.1|LARK_DROME	6575	GO:0071013:cellular_component:catalytic step 2 spliceosome	GO:0005737:cellular_component:cytoplasm	GO:0005634:cellular_component:nucleus	GO:0071011:cellular_component:precatalytic spliceosome	GO:0003729:molecular_function:mRNA binding	GO:0000166:molecular_function:nucleotide binding	GO:0003723:molecular_function:RNA binding	GO:0008270:molecular_function:zinc ion binding	GO:0030036:biological_process:actin cytoskeleton organization	GO:0007623:biological_process:circadian rhythm	GO:0007303:biological_process:cytoplasmic transport, nurse cell to oocyte	GO:0007562:biological_process:eclosion	GO:0008062:biological_process:eclosion rhythm	GO:0009790:biological_process:embryo development	GO:0045475:biological_process:locomotor rhythm	GO:0007067:biological_process:mitotic nuclear division	GO:0000398:biological_process:mRNA splicing, via spliceosome	GO:0045804:biological_process:negative regulation of eclosion	GO:0008104:biological_process:protein localization
Locus_23744.1|BlastHit|gi|62510825|sp|Q94901.1|LARK_DROME	6576	GO:0071013:cellular_component:catalytic step 2 spliceosome	GO:0005737:cellular_component:cytoplasm	GO:0005634:cellular_component:nucleus	GO:0071011:cellular_component:precatalytic spliceosome	GO:0003729:molecular_function:mRNA binding	GO:0000166:molecular_function:nucleotide binding	GO:0003723:molecular_function:RNA binding	GO:0008270:molecular_function:zinc ion binding	GO:0030036:biological_process:actin cytoskeleton organization	GO:0007623:biological_process:circadian rhythm	GO:0007303:biological_process:cytoplasmic transport, nurse cell to oocyte	GO:0007562:biological_process:eclosion	GO:0008062:biological_process:eclosion rhythm	GO:0009790:biological_process:embryo development	GO:0045475:biological_process:locomotor rhythm	GO:0007067:biological_process:mitotic nuclear division	GO:0000398:biological_process:mRNA splicing, via spliceosome	GO:0045804:biological_process:negative regulation of eclosion	GO:0008104:biological_process:protein localization
Locus_23747.0|BlastHit|gi|82183010|sp|Q6DG91.1|PSMG1_DANRE	6580	GO:0005737:cellular_component:cytoplasm	GO:0005783:cellular_component:endoplasmic reticulum	GO:0043248:biological_process:proteasome assembly
Locus_23760.0|BlastHit|gi|62901121|sp|Q9JHB5.1|TSNAX_RAT	6587	GO:0005794:cellular_component:Golgi apparatus	GO:0005634:cellular_component:nucleus	GO:0048471:cellular_component:perinuclear region of cytoplasm	GO:0031687:molecular_function:A2A adenosine receptor binding	GO:0046872:molecular_function:metal ion binding	GO:0032403:molecular_function:protein complex binding	GO:0043565:molecular_function:sequence-specific DNA binding	GO:0030154:biological_process:cell differentiation	GO:0007275:biological_process:multicellular organismal development	GO:0007283:biological_process:spermatogenesis
Locus_23761.0|BlastHit|gi|341942208|sp|Q8BZ20.3|PAR12_MOUSE	6588	GO:0005634:cellular_component:nucleus	GO:0046872:molecular_function:metal ion binding	GO:0003950:molecular_function:NAD+ ADP-ribosyltransferase activity	GO:0044822:molecular_function:poly(A) RNA binding
Locus_23775.0|BlastHit|gi|30580619|sp|P70191.1|TRAF5_MOUSE	6596	GO:0035631:cellular_component:CD40 receptor complex	GO:0005938:cellular_component:cell cortex	GO:0005737:cellular_component:cytoplasm	GO:0009898:cellular_component:cytoplasmic side of plasma membrane	GO:0005829:cellular_component:cytosol	GO:0010008:cellular_component:endosome membrane	GO:0005811:cellular_component:lipid particle	GO:0005739:cellular_component:mitochondrion	GO:0005730:cellular_component:nucleolus	GO:0005634:cellular_component:nucleus	GO:0048471:cellular_component:perinuclear region of cytoplasm	GO:0005886:cellular_component:plasma membrane	GO:0043234:cellular_component:protein complex	GO:0042826:molecular_function:histone deacetylase binding	GO:0016874:molecular_function:ligase activity	GO:0031435:molecular_function:mitogen-activated protein kinase kinase kinase binding	GO:0043422:molecular_function:protein kinase B binding	GO:0019901:molecular_function:protein kinase binding	GO:0047485:molecular_function:protein N-terminus binding	GO:0004871:molecular_function:signal transducer activity	GO:0031996:molecular_function:thioesterase binding	GO:0005164:molecular_function:tumor necrosis factor receptor binding	GO:0031624:molecular_function:ubiquitin conjugating enzyme binding	GO:0031625:molecular_function:ubiquitin protein ligase binding	GO:0004842:molecular_function:ubiquitin-protein transferase activity	GO:0008270:molecular_function:zinc ion binding	GO:0000187:biological_process:activation of MAPK activity	GO:0007250:biological_process:activation of NF-kappaB-inducing kinase activity	GO:0032147:biological_process:activation of protein kinase activity	GO:0019886:biological_process:antigen processing and presentation of exogenous peptide antigen via MHC class II	GO:0097190:biological_process:apoptotic signaling pathway	GO:0045453:biological_process:bone resorption
Locus_23783.0|BlastHit|gi|341940223|sp|Q8CJF9.2|AGO3_MOUSE	6600	GO:0000932:cellular_component:cytoplasmic mRNA processing body	GO:0016020:cellular_component:membrane	GO:0035068:cellular_component:micro-ribonucleoprotein complex	GO:0016442:cellular_component:RISC complex	GO:0035198:molecular_function:miRNA binding	GO:0044822:molecular_function:poly(A) RNA binding	GO:0003723:molecular_function:RNA binding	GO:0006402:biological_process:mRNA catabolic process	GO:0035278:biological_process:negative regulation of translation involved in gene silencing by miRNA	GO:0072091:biological_process:regulation of stem cell proliferation
Locus_23784.0|BlastHit|gi|50401534|sp|Q7ZW41.1|RPB7_DANRE	6601	GO:0000932:cellular_component:cytoplasmic mRNA processing body	GO:0005665:cellular_component:DNA-directed RNA polymerase II, core complex	GO:0005634:cellular_component:nucleus	GO:0003899:molecular_function:DNA-directed RNA polymerase activity	GO:0003697:molecular_function:single-stranded DNA binding	GO:0003727:molecular_function:single-stranded RNA binding	GO:0031369:molecular_function:translation initiation factor binding	GO:0000291:biological_process:nuclear-transcribed mRNA catabolic process, exonucleolytic	GO:0060213:biological_process:positive regulation of nuclear-transcribed mRNA poly(A) tail shortening	GO:0045948:biological_process:positive regulation of translational initiation	GO:0006366:biological_process:transcription from RNA polymerase II promoter	GO:0006367:biological_process:transcription initiation from RNA polymerase II promoter
Locus_23786.0|BlastHit|gi|48428688|sp|Q9NRA2.2|S17A5_HUMAN	6603	GO:0030054:cellular_component:cell junction	GO:0005737:cellular_component:cytoplasm	GO:0005887:cellular_component:integral component of plasma membrane	GO:0005765:cellular_component:lysosomal membrane	GO:0016020:cellular_component:membrane	GO:0005886:cellular_component:plasma membrane	GO:0030672:cellular_component:synaptic vesicle membrane	GO:0015136:molecular_function:sialic acid transmembrane transporter activity	GO:0005351:molecular_function:sugar:proton symporter activity	GO:0006865:biological_process:amino acid transport	GO:0006820:biological_process:anion transport	GO:0006811:biological_process:ion transport	GO:0015992:biological_process:proton transport	GO:0015739:biological_process:sialic acid transport	GO:0055085:biological_process:transmembrane transport
Locus_23806.0|BlastHit|gi|1170582|sp|P11845.3|IPP2_RABIT	6610	GO:0004864:molecular_function:protein phosphatase inhibitor activity	GO:0005977:biological_process:glycogen metabolic process	GO:0043666:biological_process:regulation of phosphoprotein phosphatase activity	GO:0009966:biological_process:regulation of signal transduction
Locus_23823.0|BlastHit|gi|122797|sp|P80096.1|HCYC_PANIN	6621	GO:0005615:cellular_component:extracellular space	GO:0046872:molecular_function:metal ion binding	GO:0016491:molecular_function:oxidoreductase activity	GO:0005344:molecular_function:oxygen transporter activity
Locus_23830.0|BlastHit|gi|119367489|sp|Q28GH3.1|SAE2_XENTR	6625	GO:0005737:cellular_component:cytoplasm	GO:0005634:cellular_component:nucleus	GO:0005524:molecular_function:ATP binding	GO:0016874:molecular_function:ligase activity	GO:0046872:molecular_function:metal ion binding	GO:0019948:molecular_function:SUMO activating enzyme activity	GO:0016925:biological_process:protein sumoylation
Locus_23831.0|BlastHit|gi|135232|sp|P29084.1|T2EB_HUMAN	6626	GO:0005737:cellular_component:cytoplasm	GO:0005654:cellular_component:nucleoplasm	GO:0005634:cellular_component:nucleus	GO:0005673:cellular_component:transcription factor TFIIE complex	GO:0003677:molecular_function:DNA binding	GO:0044822:molecular_function:poly(A) RNA binding	GO:0010467:biological_process:gene expression	GO:0006355:biological_process:regulation of transcription, DNA-templated	GO:0006368:biological_process:transcription elongation from RNA polymerase II promoter	GO:0006366:biological_process:transcription from RNA polymerase II promoter	GO:0006367:biological_process:transcription initiation from RNA polymerase II promoter	GO:0016032:biological_process:viral process
Locus_23855.0|BlastHit|gi|6226823|sp|P97576.2|GRPE1_RAT	6634	GO:0005759:cellular_component:mitochondrial matrix	GO:0000774:molecular_function:adenyl-nucleotide exchange factor activity	GO:0006457:biological_process:protein folding
Locus_23860.0|BlastHit|gi|59803098|sp|Q16851.5|UGPA_HUMAN	6638	GO:0005885:cellular_component:Arp2/3 protein complex	GO:0005737:cellular_component:cytoplasm	GO:0030027:cellular_component:lamellipodium	GO:0030833:biological_process:regulation of actin filament polymerization
Locus_23860.0|BlastHit|gi|59803098|sp|Q16851.5|UGPA_HUMAN	6638	GO:0005829:cellular_component:cytosol	GO:0070062:cellular_component:extracellular vesicular exosome	GO:0005634:cellular_component:nucleus	GO:0005536:molecular_function:glucose binding	GO:0046872:molecular_function:metal ion binding	GO:0032557:molecular_function:pyrimidine ribonucleotide binding	GO:0003983:molecular_function:UTP:glucose-1-phosphate uridylyltransferase activity	GO:0005975:biological_process:carbohydrate metabolic process	GO:0052695:biological_process:cellular glucuronidation	GO:0019255:biological_process:glucose 1-phosphate metabolic process	GO:0006006:biological_process:glucose metabolic process	GO:0005978:biological_process:glycogen biosynthetic process	GO:0044281:biological_process:small molecule metabolic process	GO:0006011:biological_process:UDP-glucose metabolic process	GO:0006065:biological_process:UDP-glucuronate biosynthetic process	GO:0006805:biological_process:xenobiotic metabolic process
Locus_23866.0|BlastHit|gi|23813917|sp|Q13356.1|PPIL2_HUMAN	6641	GO:0005737:cellular_component:cytoplasm	GO:0005634:cellular_component:nucleus	GO:0005886:cellular_component:plasma membrane	GO:0016874:molecular_function:ligase activity	GO:0003755:molecular_function:peptidyl-prolyl cis-trans isomerase activity	GO:0004842:molecular_function:ubiquitin-protein transferase activity	GO:0034450:molecular_function:ubiquitin-ubiquitin ligase activity	GO:0006457:biological_process:protein folding	GO:0072659:biological_process:protein localization to plasma membrane	GO:0000209:biological_process:protein polyubiquitination
Locus_23868.0|BlastHit|gi|18266783|sp|O55029.2|COPB2_MOUSE	6643	GO:0030126:cellular_component:COPI vesicle coat	GO:0005829:cellular_component:cytosol	GO:0005794:cellular_component:Golgi apparatus	GO:0000139:cellular_component:Golgi membrane	GO:0005080:molecular_function:protein kinase C binding	GO:0005198:molecular_function:structural molecule activity	GO:0006891:biological_process:intra-Golgi vesicle-mediated transport	GO:0006886:biological_process:intracellular protein transport	GO:0006890:biological_process:retrograde vesicle-mediated transport, Golgi to ER
Locus_23904.0|BlastHit|gi|166977331|sp|A5D6U8.1|PAPL_DANRE	6657	GO:0005576:cellular_component:extracellular region	GO:0003993:molecular_function:acid phosphatase activity	GO:0046872:molecular_function:metal ion binding
Locus_23954.0|BlastHit|gi|7387725|sp|Q9WVK7.1|HCDH_RAT	6686	GO:0005743:cellular_component:mitochondrial inner membrane	GO:0005759:cellular_component:mitochondrial matrix	GO:0005634:cellular_component:nucleus	GO:0003857:molecular_function:3-hydroxyacyl-CoA dehydrogenase activity	GO:0070403:molecular_function:NAD+ binding	GO:0006635:biological_process:fatty acid beta-oxidation	GO:0046676:biological_process:negative regulation of insulin secretion	GO:0014823:biological_process:response to activity	GO:0042493:biological_process:response to drug	GO:0009725:biological_process:response to hormone	GO:0032868:biological_process:response to insulin
Locus_23977.0|BlastHit|gi|51316067|sp|Q95M17.1|CHIA_BOVIN	6700	GO:0005737:cellular_component:cytoplasm	GO:0005615:cellular_component:extracellular space	GO:0008061:molecular_function:chitin binding	GO:0004568:molecular_function:chitinase activity	GO:0006915:biological_process:apoptotic process	GO:0006032:biological_process:chitin catabolic process	GO:0002376:biological_process:immune system process	GO:0000272:biological_process:polysaccharide catabolic process	GO:0090197:biological_process:positive regulation of chemokine secretion	GO:0002532:biological_process:production of molecular mediator involved in inflammatory response
Locus_23989.0|BlastHit|gi|29840846|sp|Q10713.2|MPPA_HUMAN	6706	GO:0005615:cellular_component:extracellular space	GO:0005743:cellular_component:mitochondrial inner membrane	GO:0005759:cellular_component:mitochondrial matrix	GO:0005739:cellular_component:mitochondrion	GO:0046872:molecular_function:metal ion binding	GO:0004222:molecular_function:metalloendopeptidase activity	GO:0044267:biological_process:cellular protein metabolic process	GO:0006626:biological_process:protein targeting to mitochondrion	GO:0006508:biological_process:proteolysis
Locus_23992.0|BlastHit|gi|41018011|sp|Q8BJU0.2|SGTA_MOUSE	6707	GO:0005737:cellular_component:cytoplasm	GO:0016032:biological_process:viral process
Locus_24000.0|BlastHit|gi|465731|sp|P34276.1|YKJ2_CAEEL	6715	GO:0016021:cellular_component:integral component of membrane
Locus_24011.0|BlastHit|gi|75017031|sp|Q8MQS8.1|SP34_APIME	6721	GO:0005576:cellular_component:extracellular region	GO:0004252:molecular_function:serine-type endopeptidase activity
Locus_24013.1|BlastHit|gi|23503090|sp|Q62425.2|NDUA4_MOUSE	6722	GO:0070062:cellular_component:extracellular vesicular exosome	GO:0005743:cellular_component:mitochondrial inner membrane	GO:0005751:cellular_component:mitochondrial respiratory chain complex IV	GO:0005739:cellular_component:mitochondrion	GO:0004129:molecular_function:cytochrome-c oxidase activity	GO:0032403:molecular_function:protein complex binding
Locus_24016.0|BlastHit|gi|729208|sp|P38488.2|CREA_PSEPU	6725	GO:0016980:molecular_function:creatinase activity
Locus_24022.0|BlastHit|gi|119370351|sp|Q9JLL0.2|CRIM1_MOUSE	6729	GO:0005576:cellular_component:extracellular region	GO:0045087:biological_process:innate immune response	GO:0001558:biological_process:regulation of cell growth
Locus_24029.0|BlastHit|gi|160395584|sp|Q7Q021.4|GLT25_ANOGA	6734	GO:0005788:cellular_component:endoplasmic reticulum lumen	GO:0016757:molecular_function:transferase activity, transferring glycosyl groups	GO:0009103:biological_process:lipopolysaccharide biosynthetic process
Locus_24038.0|BlastHit|gi|313471718|sp|B1A4F7.1|VDDP4_VESVU	6748	GO:0005576:cellular_component:extracellular region	GO:0016020:cellular_component:membrane	GO:0004177:molecular_function:aminopeptidase activity	GO:0008236:molecular_function:serine-type peptidase activity
Locus_24041.0|BlastHit|gi|66774115|sp|Q38813.2|DNAJ1_ARATH	6749	GO:0005739:cellular_component:mitochondrion	GO:0005524:molecular_function:ATP binding	GO:0003676:molecular_function:nucleic acid binding	GO:0008270:molecular_function:zinc ion binding	GO:0006457:biological_process:protein folding	GO:0009408:biological_process:response to heat
Locus_24070.0|BlastHit|gi|37999713|sp|Q8N806.2|UBR7_HUMAN	6771	GO:0016874:molecular_function:ligase activity	GO:0004842:molecular_function:ubiquitin-protein transferase activity	GO:0008270:molecular_function:zinc ion binding
Locus_24090.0|BlastHit|gi|21263796|sp|Q9Z2Q5.2|RM40_MOUSE	6779	GO:0005761:cellular_component:mitochondrial ribosome	GO:0005739:cellular_component:mitochondrion	GO:0005730:cellular_component:nucleolus	GO:0044822:molecular_function:poly(A) RNA binding
Locus_24092.0|BlastHit|gi|308153557|sp|Q60520.3|SIN3A_MOUSE	6781	GO:0005737:cellular_component:cytoplasm	GO:0045171:cellular_component:intercellular bridge	GO:0000776:cellular_component:kinetochore	GO:0005730:cellular_component:nucleolus	GO:0005634:cellular_component:nucleus	GO:0016580:cellular_component:Sin3 complex	GO:0005667:cellular_component:transcription factor complex	GO:0017053:cellular_component:transcriptional repressor complex	GO:0003682:molecular_function:chromatin binding	GO:0003677:molecular_function:DNA binding	GO:0033558:molecular_function:protein deacetylase activity	GO:0001103:molecular_function:RNA polymerase II repressing transcription factor binding	GO:0001106:molecular_function:RNA polymerase II transcription corepressor activity	GO:0003700:molecular_function:sequence-specific DNA binding transcription factor activity	GO:0003714:molecular_function:transcription corepressor activity	GO:0008134:molecular_function:transcription factor binding	GO:0000976:molecular_function:transcription regulatory region sequence-specific DNA binding	GO:0002218:biological_process:activation of innate immune response	GO:0007568:biological_process:aging	GO:0034613:biological_process:cellular protein localization	GO:0071333:biological_process:cellular response to glucose stimulus	GO:0006260:biological_process:DNA replication	GO:0002244:biological_process:hematopoietic progenitor cell differentiation	GO:0001701:biological_process:in utero embryonic development	GO:0043066:biological_process:negative regulation of apoptotic process	GO:0042754:biological_process:negative regulation of circadian rhythm	GO:1901675:biological_process:negative regulation of histone H3-K27 acetylation	GO:1900181:biological_process:negative regulation of protein localization to nucleus	GO:0000122:biological_process:negative regulation of transcription from RNA polymerase II promoter	GO:2000678:biological_process:negative regulation of transcription regulatory region DNA binding	GO:0045892:biological_process:negative regulation of transcription, DNA-templated	GO:0031937:biological_process:positive regulation of chromatin silencing
Locus_24098.0|BlastHit|gi|2501006|sp|P70076.1|SYHC_TAKRU	6783	GO:0005737:cellular_component:cytoplasm	GO:0005524:molecular_function:ATP binding	GO:0004821:molecular_function:histidine-tRNA ligase activity	GO:0006427:biological_process:histidyl-tRNA aminoacylation
Locus_24100.0|BlastHit|gi|75054832|sp|Q5R703.1|SNG1_PONAB	6784	GO:0070062:cellular_component:extracellular vesicular exosome	GO:0016021:cellular_component:integral component of membrane	GO:0008021:cellular_component:synaptic vesicle
Locus_24109.0|BlastHit|gi|51316213|sp|Q6GVM3.3|IF1AY_PANTR	6789	GO:0003743:molecular_function:translation initiation factor activity
Locus_24118.0|BlastHit|gi|60390866|sp|Q5SSI6.1|UTP18_MOUSE	6795	GO:0005730:cellular_component:nucleolus	GO:0044822:molecular_function:poly(A) RNA binding	GO:0006364:biological_process:rRNA processing
Locus_24119.0|BlastHit|gi|74848914|sp|Q9GV27.1|EIF3H_BOMMO	6796	GO:0016282:cellular_component:eukaryotic 43S preinitiation complex	GO:0033290:cellular_component:eukaryotic 48S preinitiation complex	GO:0005852:cellular_component:eukaryotic translation initiation factor 3 complex	GO:0003743:molecular_function:translation initiation factor activity	GO:0001731:biological_process:formation of translation preinitiation complex
Locus_24126.0|BlastHit|gi|251757329|sp|Q96T23.2|RSF1_HUMAN	6800	GO:0005654:cellular_component:nucleoplasm	GO:0005634:cellular_component:nucleus	GO:0031213:cellular_component:RSF complex	GO:0042393:molecular_function:histone binding	GO:0008270:molecular_function:zinc ion binding	GO:0034080:biological_process:CENP-A containing nucleosome assembly	GO:0006338:biological_process:chromatin remodeling	GO:0006352:biological_process:DNA-templated transcription, initiation	GO:0043392:biological_process:negative regulation of DNA binding	GO:0045892:biological_process:negative regulation of transcription, DNA-templated	GO:0006334:biological_process:nucleosome assembly	GO:0016584:biological_process:nucleosome positioning	GO:0045893:biological_process:positive regulation of transcription, DNA-templated	GO:0050434:biological_process:positive regulation of viral transcription
Locus_24133.0|BlastHit|gi|30581054|sp|P48601.2|PRS4_DROME	6807	GO:0005737:cellular_component:cytoplasm	GO:0005634:cellular_component:nucleus	GO:0005838:cellular_component:proteasome regulatory particle	GO:0008540:cellular_component:proteasome regulatory particle, base subcomplex	GO:0005524:molecular_function:ATP binding	GO:0016787:molecular_function:hydrolase activity	GO:0008283:biological_process:cell proliferation	GO:0009987:biological_process:cellular process	GO:0006974:biological_process:cellular response to DNA damage stimulus	GO:0000022:biological_process:mitotic spindle elongation	GO:0007052:biological_process:mitotic spindle organization	GO:0043161:biological_process:proteasome-mediated ubiquitin-dependent protein catabolic process	GO:0006508:biological_process:proteolysis	GO:0090307:biological_process:mitotic spindle assembly
Locus_24141.0|BlastHit|gi|71152389|sp|Q9CQF4.1|CF203_MOUSE	6812	GO:0005739:cellular_component:mitochondrion
Locus_24158.0|BlastHit|gi|67461733|sp|Q68FW4.1|STX18_RAT	6822	GO:0005789:cellular_component:endoplasmic reticulum membrane	GO:0000139:cellular_component:Golgi membrane	GO:0016021:cellular_component:integral component of membrane	GO:0006886:biological_process:intracellular protein transport	GO:0016192:biological_process:vesicle-mediated transport
Locus_24161.0|BlastHit|gi|52782766|sp|Q9Z336.1|DYLT1_RAT	6824	GO:0005868:cellular_component:cytoplasmic dynein complex	GO:0005794:cellular_component:Golgi apparatus	GO:0005874:cellular_component:microtubule	GO:0005819:cellular_component:spindle	GO:0003774:molecular_function:motor activity	GO:0000132:biological_process:establishment of mitotic spindle orientation	GO:0006886:biological_process:intracellular protein transport	GO:0019060:biological_process:intracellular transport of viral protein in host cell	GO:0007067:biological_process:mitotic nuclear division	GO:0050768:biological_process:negative regulation of neurogenesis	GO:0048812:biological_process:neuron projection morphogenesis	GO:0051493:biological_process:regulation of cytoskeleton organization	GO:0008277:biological_process:regulation of G-protein coupled receptor protein signaling pathway	GO:0032314:biological_process:regulation of Rac GTPase activity
Locus_24178.0|BlastHit|gi|73621224|sp|P0C090.1|RC3H2_MOUSE	6836	GO:0009986:cellular_component:cell surface	GO:0000932:cellular_component:cytoplasmic mRNA processing body	GO:0016020:cellular_component:membrane	GO:0005634:cellular_component:nucleus	GO:0003677:molecular_function:DNA binding	GO:0003729:molecular_function:mRNA binding	GO:0004842:molecular_function:ubiquitin-protein transferase activity	GO:0008270:molecular_function:zinc ion binding	GO:0001782:biological_process:B cell homeostasis	GO:0060173:biological_process:limb development	GO:0048286:biological_process:lung alveolus development	GO:0048535:biological_process:lymph node development	GO:0035264:biological_process:multicellular organism growth	GO:1901224:biological_process:positive regulation of NIK/NF-kappaB signaling	GO:0009791:biological_process:post-embryonic development	GO:0010608:biological_process:posttranscriptional regulation of gene expression	GO:0000209:biological_process:protein polyubiquitination	GO:0010468:biological_process:regulation of gene expression	GO:0048536:biological_process:spleen development	GO:0043029:biological_process:T cell homeostasis	GO:0042098:biological_process:T cell proliferation	GO:0061470:biological_process:T follicular helper cell differentiation
Locus_24194.0|BlastHit|gi|68844926|sp|P51592.3|HYD_DROME	6853	GO:0005737:cellular_component:cytoplasm	GO:0005634:cellular_component:nucleus	GO:0016874:molecular_function:ligase activity	GO:0003723:molecular_function:RNA binding	GO:0004842:molecular_function:ubiquitin-protein transferase activity	GO:0008270:molecular_function:zinc ion binding	GO:0048749:biological_process:compound eye development	GO:0007455:biological_process:eye-antennal disc morphogenesis	GO:0008585:biological_process:female gonad development	GO:0007444:biological_process:imaginal disc development	GO:0007446:biological_process:imaginal disc growth	GO:0007112:biological_process:male meiosis cytokinesis	GO:0045879:biological_process:negative regulation of smoothened signaling pathway	GO:0042787:biological_process:protein ubiquitination involved in ubiquitin-dependent protein catabolic process	GO:0030162:biological_process:regulation of proteolysis	GO:0007289:biological_process:spermatid nucleus differentiation	GO:0007283:biological_process:spermatogenesis
Locus_24196.0|BlastHit|gi|75027154|sp|Q9VLJ9.2|RM51_DROME	6855	GO:0005762:cellular_component:mitochondrial large ribosomal subunit	GO:0003735:molecular_function:structural constituent of ribosome	GO:0006412:biological_process:translation
Locus_24214.1|BlastHit|gi|75041948|sp|Q5RAX0.1|PAF1_PONAB	6864	GO:0016593:cellular_component:Cdc73/Paf1 complex	GO:0000993:molecular_function:RNA polymerase II core binding	GO:0000122:biological_process:negative regulation of transcription from RNA polymerase II promoter	GO:0032968:biological_process:positive regulation of transcription elongation from RNA polymerase II promoter	GO:0045944:biological_process:positive regulation of transcription from RNA polymerase II promoter	GO:0006351:biological_process:transcription, DNA-templated
Locus_24221.0|BlastHit|gi|25453430|sp|Q27367.2|CRQ_DROME	6869	GO:0005901:cellular_component:caveola	GO:0070062:cellular_component:extracellular vesicular exosome	GO:0005887:cellular_component:integral component of plasma membrane	GO:0005765:cellular_component:lysosomal membrane	GO:0008035:molecular_function:high-density lipoprotein particle binding	GO:0070506:molecular_function:high-density lipoprotein particle receptor activity	GO:0001530:molecular_function:lipopolysaccharide binding	GO:0001875:molecular_function:lipopolysaccharide receptor activity	GO:0030169:molecular_function:low-density lipoprotein particle binding	GO:0044406:biological_process:adhesion of symbiont to host	GO:0043534:biological_process:blood vessel endothelial cell migration	GO:0007155:biological_process:cell adhesion	GO:0006707:biological_process:cholesterol catabolic process	GO:0033344:biological_process:cholesterol efflux	GO:0042632:biological_process:cholesterol homeostasis	GO:0070508:biological_process:cholesterol import	GO:0032497:biological_process:detection of lipopolysaccharide	GO:0001935:biological_process:endothelial cell proliferation	GO:0034384:biological_process:high-density lipoprotein particle clearance	GO:0034375:biological_process:high-density lipoprotein particle remodeling	GO:0015920:biological_process:lipopolysaccharide transport	GO:0034383:biological_process:low-density lipoprotein particle clearance	GO:0015914:biological_process:phospholipid transport	GO:0010886:biological_process:positive regulation of cholesterol storage	GO:0051000:biological_process:positive regulation of nitric-oxide synthase activity	GO:0010867:biological_process:positive regulation of triglyceride biosynthetic process	GO:0043654:biological_process:recognition of apoptotic cell	GO:0010899:biological_process:regulation of phosphatidylcholine catabolic process	GO:0043691:biological_process:reverse cholesterol transport	GO:0070328:biological_process:triglyceride homeostasis
Locus_24222.0|BlastHit|gi|325530038|sp|P0CL18.1|EIF2D_RABIT	6870	GO:0022627:cellular_component:cytosolic small ribosomal subunit	GO:0005634:cellular_component:nucleus	GO:0003743:molecular_function:translation initiation factor activity	GO:0001731:biological_process:formation of translation preinitiation complex	GO:0002192:biological_process:IRES-dependent translational initiation	GO:0032790:biological_process:ribosome disassembly
Locus_24249.0|BlastHit|gi|182675532|sp|A4FV84.1|MRT4_BOVIN	6889	GO:0005737:cellular_component:cytoplasm	GO:0031965:cellular_component:nuclear membrane	GO:0005730:cellular_component:nucleolus	GO:0044822:molecular_function:poly(A) RNA binding	GO:0042254:biological_process:ribosome biogenesis
Locus_24252.0|BlastHit|gi|399496|sp|Q01543.1|FLI1_HUMAN	6890	GO:0005634:cellular_component:nucleus	GO:0003682:molecular_function:chromatin binding	GO:0003677:molecular_function:DNA binding	GO:0000978:molecular_function:RNA polymerase II core promoter proximal region sequence-specific DNA binding	GO:0001077:molecular_function:RNA polymerase II core promoter proximal region sequence-specific DNA binding transcription factor activity involved in positive regulation of transcription	GO:0000980:molecular_function:RNA polymerase II distal enhancer sequence-specific DNA binding	GO:0000981:molecular_function:sequence-specific DNA binding RNA polymerase II transcription factor activity	GO:0003700:molecular_function:sequence-specific DNA binding transcription factor activity	GO:0008015:biological_process:blood circulation	GO:0030154:biological_process:cell differentiation	GO:0007599:biological_process:hemostasis	GO:0035855:biological_process:megakaryocyte development	GO:0009887:biological_process:organ morphogenesis	GO:0006357:biological_process:regulation of transcription from RNA polymerase II promoter	GO:0006366:biological_process:transcription from RNA polymerase II promoter
Locus_24258.0|BlastHit|gi|1703326|sp|P50583.3|AP4A_HUMAN	6900	GO:0005739:cellular_component:mitochondrion	GO:0004081:molecular_function:bis(5'-nucleosyl)-tetraphosphatase (asymmetrical) activity	GO:0008803:molecular_function:bis(5'-nucleosyl)-tetraphosphatase (symmetrical) activity	GO:0005525:molecular_function:GTP binding	GO:0006915:biological_process:apoptotic process	GO:0006139:biological_process:nucleobase-containing compound metabolic process
Locus_24273.0|BlastHit|gi|24211597|sp|Q9CQT9.1|CT024_MOUSE	6905	GO:0005739:cellular_component:mitochondrion
Locus_24276.0|BlastHit|gi|109892092|sp|Q5E9V6.2|COMD4_BOVIN	6907	GO:0005737:cellular_component:cytoplasm
Locus_24286.0|BlastHit|gi|543797|sp|P07764.5|ALF_DROME	6917	GO:0031430:cellular_component:M band	GO:0030018:cellular_component:Z disc	GO:0004332:molecular_function:fructose-bisphosphate aldolase activity	GO:0006096:biological_process:glycolytic process	GO:0007498:biological_process:mesoderm development	GO:0007095:biological_process:mitotic G2 DNA damage checkpoint
Locus_24296.0|BlastHit|gi|82231625|sp|Q5I047.1|F173B_XENLA	6919	GO:0016021:cellular_component:integral component of membrane
Locus_24299.0|BlastHit|gi|269849749|sp|P00637.4|F16P1_RABIT	6921	GO:0005737:cellular_component:cytoplasm	GO:0005829:cellular_component:cytosol	GO:0016208:molecular_function:AMP binding	GO:0042132:molecular_function:fructose 1,6-bisphosphate 1-phosphatase activity	GO:0046872:molecular_function:metal ion binding	GO:0048029:molecular_function:monosaccharide binding	GO:0035690:biological_process:cellular response to drug	GO:0071286:biological_process:cellular response to magnesium ion	GO:0016311:biological_process:dephosphorylation	GO:0006002:biological_process:fructose 6-phosphate metabolic process	GO:0006094:biological_process:gluconeogenesis	GO:0030308:biological_process:negative regulation of cell growth	GO:0045820:biological_process:negative regulation of glycolytic process	GO:0046580:biological_process:negative regulation of Ras protein signal transduction	GO:0051289:biological_process:protein homotetramerization	GO:0006111:biological_process:regulation of gluconeogenesis
Locus_24299.0|BlastHit|gi|269849749|sp|P00637.4|F16P1_RABIT	6922	GO:0005737:cellular_component:cytoplasm	GO:0005829:cellular_component:cytosol	GO:0016208:molecular_function:AMP binding	GO:0042132:molecular_function:fructose 1,6-bisphosphate 1-phosphatase activity	GO:0046872:molecular_function:metal ion binding	GO:0048029:molecular_function:monosaccharide binding	GO:0035690:biological_process:cellular response to drug	GO:0071286:biological_process:cellular response to magnesium ion	GO:0016311:biological_process:dephosphorylation	GO:0006002:biological_process:fructose 6-phosphate metabolic process	GO:0006094:biological_process:gluconeogenesis	GO:0030308:biological_process:negative regulation of cell growth	GO:0045820:biological_process:negative regulation of glycolytic process	GO:0046580:biological_process:negative regulation of Ras protein signal transduction	GO:0051289:biological_process:protein homotetramerization	GO:0006111:biological_process:regulation of gluconeogenesis
Locus_24323.1|BlastHit|gi|41688588|sp|Q8VI75.1|IPO4_MOUSE	6940	GO:0005737:cellular_component:cytoplasm	GO:0016020:cellular_component:membrane	GO:0000790:cellular_component:nuclear chromatin	GO:0043234:cellular_component:protein complex	GO:0006335:biological_process:DNA replication-dependent nucleosome assembly	GO:0006336:biological_process:DNA replication-independent nucleosome assembly	GO:0006886:biological_process:intracellular protein transport	GO:0015031:biological_process:protein transport
Locus_24323.1|BlastHit|gi|41688588|sp|Q8VI75.1|IPO4_MOUSE	6941	GO:0005737:cellular_component:cytoplasm	GO:0016020:cellular_component:membrane	GO:0000790:cellular_component:nuclear chromatin	GO:0043234:cellular_component:protein complex	GO:0006335:biological_process:DNA replication-dependent nucleosome assembly	GO:0006336:biological_process:DNA replication-independent nucleosome assembly	GO:0006886:biological_process:intracellular protein transport	GO:0015031:biological_process:protein transport
Locus_24329.0|BlastHit|gi|82184013|sp|Q6GM78.1|ASGL1_XENLA	6943	GO:0005737:cellular_component:cytoplasm	GO:0004067:molecular_function:asparaginase activity	GO:0008798:molecular_function:beta-aspartyl-peptidase activity	GO:0003948:molecular_function:N4-(beta-N-acetylglucosaminyl)-L-asparaginase activity	GO:0033345:biological_process:asparagine catabolic process via L-aspartate
Locus_24332.0|BlastHit|gi|327478582|sp|P13284.3|GILT_HUMAN	6944	GO:0030054:cellular_component:cell junction	GO:0005737:cellular_component:cytoplasm	GO:0005576:cellular_component:extracellular region	GO:0043231:cellular_component:intracellular membrane-bounded organelle	GO:0043202:cellular_component:lysosomal lumen	GO:0005764:cellular_component:lysosome	GO:0005886:cellular_component:plasma membrane	GO:0016667:molecular_function:oxidoreductase activity, acting on a sulfur group of donors	GO:0042590:biological_process:antigen processing and presentation of exogenous peptide antigen via MHC class I	GO:0019886:biological_process:antigen processing and presentation of exogenous peptide antigen via MHC class II	GO:0019221:biological_process:cytokine-mediated signaling pathway	GO:0060333:biological_process:interferon-gamma-mediated signaling pathway	GO:0048147:biological_process:negative regulation of fibroblast proliferation	GO:0050821:biological_process:protein stabilization
Locus_24333.0|BlastHit|gi|27151690|sp|Q9UHW9.2|S12A6_HUMAN	6945	GO:0016323:cellular_component:basolateral plasma membrane	GO:0016021:cellular_component:integral component of membrane	GO:0005886:cellular_component:plasma membrane	GO:0015079:molecular_function:potassium ion transmembrane transporter activity	GO:0015379:molecular_function:potassium:chloride symporter activity	GO:0019901:molecular_function:protein kinase binding	GO:0035827:molecular_function:rubidium ion transmembrane transporter activity	GO:0001525:biological_process:angiogenesis	GO:0071476:biological_process:cellular hypotonic response	GO:0071477:biological_process:cellular hypotonic salinity response	GO:1902476:biological_process:chloride transmembrane transport	GO:0006821:biological_process:chloride transport	GO:0006811:biological_process:ion transport	GO:0010107:biological_process:potassium ion import	GO:0006813:biological_process:potassium ion transport	GO:0035826:biological_process:rubidium ion transport	GO:0055085:biological_process:transmembrane transport
Locus_24352.1|BlastHit|gi|193806339|sp|P41822.2|FRI_AEDAE	6955	GO:0005576:cellular_component:extracellular region	GO:0008199:molecular_function:ferric iron binding	GO:0004322:molecular_function:ferroxidase activity	GO:0006879:biological_process:cellular iron ion homeostasis	GO:0006826:biological_process:iron ion transport
Locus_24352.1|BlastHit|gi|193806339|sp|P41822.2|FRI_AEDAE	6956	GO:0005576:cellular_component:extracellular region	GO:0008199:molecular_function:ferric iron binding	GO:0004322:molecular_function:ferroxidase activity	GO:0006879:biological_process:cellular iron ion homeostasis	GO:0006826:biological_process:iron ion transport
Locus_24355.0|BlastHit|gi|313104268|sp|P30536.3|TSPOA_HUMAN	6960	GO:0005737:cellular_component:cytoplasm	GO:0070062:cellular_component:extracellular vesicular exosome	GO:0016021:cellular_component:integral component of membrane	GO:0043231:cellular_component:intracellular membrane-bounded organelle	GO:0005741:cellular_component:mitochondrial outer membrane	GO:0005739:cellular_component:mitochondrion	GO:0031965:cellular_component:nuclear membrane	GO:0008503:molecular_function:benzodiazepine receptor activity	GO:0015485:molecular_function:cholesterol binding	GO:0006820:biological_process:anion transport	GO:0006915:biological_process:apoptotic process	GO:0008283:biological_process:cell proliferation	GO:0006783:biological_process:heme biosynthetic process	GO:0006869:biological_process:lipid transport	GO:0006626:biological_process:protein targeting to mitochondrion	GO:0032374:biological_process:regulation of cholesterol transport	GO:0008202:biological_process:steroid metabolic process	GO:0007268:biological_process:synaptic transmission
Locus_24356.0|BlastHit|gi|82184566|sp|Q6GQ48.1|LIAS_XENLA	6961	GO:0005739:cellular_component:mitochondrion	GO:0051539:molecular_function:4 iron, 4 sulfur cluster binding	GO:0016992:molecular_function:lipoate synthase activity	GO:0046872:molecular_function:metal ion binding	GO:0009249:biological_process:protein lipoylation
Locus_24362.0|BlastHit|gi|172045785|sp|Q9N2J2.2|GPX4_BOVIN	6966	GO:0005737:cellular_component:cytoplasm	GO:0004602:molecular_function:glutathione peroxidase activity	GO:0047066:molecular_function:phospholipid-hydroperoxide glutathione peroxidase activity	GO:0006979:biological_process:response to oxidative stress
Locus_24362.0|BlastHit|gi|172045785|sp|Q9N2J2.2|GPX4_BOVIN	6966	GO:0009507:cellular_component:chloroplast	GO:0004602:molecular_function:glutathione peroxidase activity	GO:0080167:biological_process:response to karrikin	GO:0006979:biological_process:response to oxidative stress
Locus_24370.0|BlastHit|gi|116242689|sp|P11966.2|ODPB_BOVIN	6967	GO:0070062:cellular_component:extracellular vesicular exosome	GO:0005759:cellular_component:mitochondrial matrix	GO:0005634:cellular_component:nucleus	GO:0045254:cellular_component:pyruvate dehydrogenase complex	GO:0004739:molecular_function:pyruvate dehydrogenase (acetyl-transferring) activity	GO:0004738:molecular_function:pyruvate dehydrogenase activity	GO:0006086:biological_process:acetyl-CoA biosynthetic process from pyruvate	GO:0006006:biological_process:glucose metabolic process	GO:0006099:biological_process:tricarboxylic acid cycle
Locus_24373.1|BlastHit|gi|81905670|sp|Q9D8N3.1|TM86A_MOUSE	6969	GO:0016021:cellular_component:integral component of membrane
Locus_24388.0|BlastHit|gi|136411|sp|P06872.1|TRY2_CANFA	6977	GO:0005576:cellular_component:extracellular region	GO:0005615:cellular_component:extracellular space	GO:0005509:molecular_function:calcium ion binding	GO:0004252:molecular_function:serine-type endopeptidase activity	GO:0030574:biological_process:collagen catabolic process	GO:0007586:biological_process:digestion	GO:0006508:biological_process:proteolysis
Locus_24398.0|BlastHit|gi|121993808|sp|Q29HY3.1|CDC42_DROPS	6988	GO:0005912:cellular_component:adherens junction	GO:0005622:cellular_component:intracellular	GO:0005886:cellular_component:plasma membrane	GO:0005525:molecular_function:GTP binding	GO:0045185:biological_process:maintenance of protein location	GO:0007275:biological_process:multicellular organismal development	GO:0045860:biological_process:positive regulation of protein kinase activity	GO:0007264:biological_process:small GTPase mediated signal transduction
Locus_24401.0|BlastHit|gi|13124116|sp|Q9WTS8.2|FCN1_RAT	6990	GO:0005581:cellular_component:collagen trimer	GO:0005576:cellular_component:extracellular region	GO:0031232:cellular_component:extrinsic component of external side of plasma membrane	GO:0030246:molecular_function:carbohydrate binding	GO:0046872:molecular_function:metal ion binding	GO:0008329:molecular_function:signaling pattern recognition receptor activity	GO:0002752:biological_process:cell surface pattern recognition receptor signaling pathway	GO:0007186:biological_process:G-protein coupled receptor signaling pathway	GO:0045087:biological_process:innate immune response	GO:2000484:biological_process:positive regulation of interleukin-8 secretion
Locus_24409.0|BlastHit|gi|209574317|sp|Q1MTN8.2|YGC1_SCHPO	6993	GO:0005730:cellular_component:nucleolus	GO:0005634:cellular_component:nucleus	GO:0043234:cellular_component:protein complex
Locus_24428.0|BlastHit|gi|13124554|sp|O44437.1|SMD3_DROME	7004	GO:0071013:cellular_component:catalytic step 2 spliceosome	GO:0045495:cellular_component:pole plasm	GO:0071011:cellular_component:precatalytic spliceosome	GO:0030532:cellular_component:small nuclear ribonucleoprotein complex	GO:0005681:cellular_component:spliceosomal complex	GO:0007417:biological_process:central nervous system development	GO:0048542:biological_process:lymph gland development	GO:0007067:biological_process:mitotic nuclear division	GO:0007052:biological_process:mitotic spindle organization	GO:0000398:biological_process:mRNA splicing, via spliceosome	GO:0007517:biological_process:muscle organ development	GO:0030182:biological_process:neuron differentiation	GO:0007422:biological_process:peripheral nervous system development	GO:0045451:biological_process:pole plasm oskar mRNA localization
Locus_24444.0|BlastHit|gi|82080931|sp|Q5ZI03.1|CIR1_CHICK	7011	GO:0000118:cellular_component:histone deacetylase complex	GO:0016607:cellular_component:nuclear speck	GO:0006397:biological_process:mRNA processing	GO:0045892:biological_process:negative regulation of transcription, DNA-templated	GO:0008380:biological_process:RNA splicing	GO:0006351:biological_process:transcription, DNA-templated
Locus_24447.0|BlastHit|gi|14916636|sp|Q9XTL9.2|PYG_DROME	7014	GO:0008184:molecular_function:glycogen phosphorylase activity	GO:0030170:molecular_function:pyridoxal phosphate binding	GO:0050829:biological_process:defense response to Gram-negative bacterium	GO:0008340:biological_process:determination of adult lifespan	GO:0060361:biological_process:flight	GO:0005980:biological_process:glycogen catabolic process	GO:0045824:biological_process:negative regulation of innate immune response
Locus_24449.0|BlastHit|gi|50403748|sp|P55735.3|SEC13_HUMAN	7015	GO:0005829:cellular_component:cytosol	GO:0005789:cellular_component:endoplasmic reticulum membrane	GO:0012507:cellular_component:ER to Golgi transport vesicle membrane	GO:0070062:cellular_component:extracellular vesicular exosome	GO:0000139:cellular_component:Golgi membrane	GO:0005635:cellular_component:nuclear envelope	GO:0031080:cellular_component:nuclear pore outer ring	GO:0019886:biological_process:antigen processing and presentation of exogenous peptide antigen via MHC class II	GO:0002474:biological_process:antigen processing and presentation of peptide antigen via MHC class I	GO:0044267:biological_process:cellular protein metabolic process	GO:0048208:biological_process:COPII vesicle coating	GO:0006888:biological_process:ER to Golgi vesicle-mediated transport	GO:0006886:biological_process:intracellular protein transport	GO:0061024:biological_process:membrane organization	GO:0000278:biological_process:mitotic cell cycle	GO:0051028:biological_process:mRNA transport	GO:0043687:biological_process:post-translational protein modification	GO:0018279:biological_process:protein N-linked glycosylation via asparagine
Locus_24452.0|BlastHit|gi|110278814|sp|Q3ZC89.1|AMPM2_BOVIN	7016	GO:0005737:cellular_component:cytoplasm	GO:0005886:cellular_component:plasma membrane	GO:0004177:molecular_function:aminopeptidase activity	GO:0046872:molecular_function:metal ion binding	GO:0070006:molecular_function:metalloaminopeptidase activity	GO:0008235:molecular_function:metalloexopeptidase activity	GO:0044822:molecular_function:poly(A) RNA binding	GO:0031365:biological_process:N-terminal protein amino acid modification	GO:0018206:biological_process:peptidyl-methionine modification	GO:0070084:biological_process:protein initiator methionine removal	GO:0016485:biological_process:protein processing
Locus_24454.0|BlastHit|gi|294862526|sp|Q2KJC9.4|AL7A1_BOVIN	7017	GO:0005829:cellular_component:cytosol	GO:0005739:cellular_component:mitochondrion	GO:0005634:cellular_component:nucleus	GO:0008802:molecular_function:betaine-aldehyde dehydrogenase activity	GO:0004043:molecular_function:L-aminoadipate-semialdehyde dehydrogenase activity	GO:0019285:biological_process:glycine betaine biosynthetic process from choline
Locus_24460.0|BlastHit|gi|28381357|sp|Q9UI10.2|EI2BD_HUMAN	7021	GO:0005737:cellular_component:cytoplasm	GO:0005829:cellular_component:cytosol	GO:0005851:cellular_component:eukaryotic translation initiation factor 2B complex	GO:0003743:molecular_function:translation initiation factor activity	GO:0031369:molecular_function:translation initiation factor binding	GO:0044267:biological_process:cellular protein metabolic process	GO:0051716:biological_process:cellular response to stimulus	GO:0010467:biological_process:gene expression	GO:0042552:biological_process:myelination	GO:0045947:biological_process:negative regulation of translational initiation	GO:0032057:biological_process:negative regulation of translational initiation in response to stress	GO:0014003:biological_process:oligodendrocyte development	GO:0001541:biological_process:ovarian follicle development	GO:0043547:biological_process:positive regulation of GTPase activity	GO:0006417:biological_process:regulation of translation	GO:0006446:biological_process:regulation of translational initiation	GO:0009749:biological_process:response to glucose	GO:0009408:biological_process:response to heat	GO:0043434:biological_process:response to peptide hormone	GO:0006412:biological_process:translation	GO:0006413:biological_process:translational initiation
Locus_24468.0|BlastHit|gi|3913352|sp|Q27712.1|CP2L1_PANAR	7028	GO:0005789:cellular_component:endoplasmic reticulum membrane	GO:0070330:molecular_function:aromatase activity	GO:0020037:molecular_function:heme binding	GO:0005506:molecular_function:iron ion binding
Locus_24471.0|BlastHit|gi|75075711|sp|Q4R4I6.3|CAP1_MACFA	7041	GO:0030864:cellular_component:cortical actin cytoskeleton	GO:0070062:cellular_component:extracellular vesicular exosome	GO:0005925:cellular_component:focal adhesion	GO:0005886:cellular_component:plasma membrane	GO:0030036:biological_process:actin cytoskeleton organization	GO:0007190:biological_process:activation of adenylate cyclase activity	GO:0001667:biological_process:ameboidal-type cell migration	GO:0007411:biological_process:axon guidance	GO:0007596:biological_process:blood coagulation	GO:0007163:biological_process:establishment or maintenance of cell polarity	GO:0030168:biological_process:platelet activation	GO:0002576:biological_process:platelet degranulation	GO:0006898:biological_process:receptor-mediated endocytosis	GO:0007165:biological_process:signal transduction
Locus_24472.0|BlastHit|gi|82229908|sp|Q561P5.1|MCM5_XENTR	7042	GO:0000785:cellular_component:chromatin	GO:0042555:cellular_component:MCM complex	GO:0005634:cellular_component:nucleus	GO:0005524:molecular_function:ATP binding	GO:0003677:molecular_function:DNA binding	GO:0003678:molecular_function:DNA helicase activity	GO:0006200:biological_process:ATP catabolic process	GO:0006270:biological_process:DNA replication initiation	GO:0006268:biological_process:DNA unwinding involved in DNA replication	GO:0009790:biological_process:embryo development	GO:0000278:biological_process:mitotic cell cycle	GO:0043066:biological_process:negative regulation of apoptotic process	GO:0030174:biological_process:regulation of DNA-dependent DNA replication initiation
Locus_24473.0|BlastHit|gi|50401156|sp|Q9D1I5.1|MCEE_MOUSE	7043	GO:0005739:cellular_component:mitochondrion	GO:0046872:molecular_function:metal ion binding	GO:0004493:molecular_function:methylmalonyl-CoA epimerase activity	GO:0046491:biological_process:L-methylmalonyl-CoA metabolic process
Locus_24486.0|BlastHit|gi|10720068|sp|Q9V447.1|KRH2_DROME	7047	GO:0012505:cellular_component:endomembrane system	GO:0016021:cellular_component:integral component of membrane
Locus_24489.0|BlastHit|gi|81910895|sp|Q6AYL5.1|SF3B4_RAT	7049	GO:0005689:cellular_component:U12-type spliceosomal complex	GO:0000166:molecular_function:nucleotide binding	GO:0044822:molecular_function:poly(A) RNA binding	GO:0006397:biological_process:mRNA processing	GO:0008380:biological_process:RNA splicing
Locus_24490.0|BlastHit|gi|41688711|sp|Q8MS27.1|RM35_DROME	7050	GO:0005762:cellular_component:mitochondrial large ribosomal subunit	GO:0003735:molecular_function:structural constituent of ribosome	GO:0060429:biological_process:epithelium development	GO:0030727:biological_process:germarium-derived female germ-line cyst formation	GO:0006412:biological_process:translation
Locus_24494.0|BlastHit|gi|73621181|sp|Q9EQZ5.1|PTGR1_CAVPO	7055	GO:0005737:cellular_component:cytoplasm	GO:0036132:molecular_function:13-prostaglandin reductase activity	GO:0047522:molecular_function:15-oxoprostaglandin 13-oxidase activity	GO:0032440:molecular_function:2-alkenal reductase [NAD(P)] activity	GO:0008270:molecular_function:zinc ion binding
Locus_24509.0|BlastHit|gi|73919440|sp|Q5M8Y1.1|SPCS2_XENTR	7061	GO:0016021:cellular_component:integral component of membrane	GO:0005787:cellular_component:signal peptidase complex	GO:0008233:molecular_function:peptidase activity	GO:0006465:biological_process:signal peptide processing
Locus_24529.0|BlastHit|gi|170652901|sp|Q5TC12.1|ATPF1_HUMAN	7071	GO:0005739:cellular_component:mitochondrion	GO:0006461:biological_process:protein complex assembly
Locus_24550.0|BlastHit|gi|62901068|sp|O76021.3|RL1D1_HUMAN	7080	GO:0016020:cellular_component:membrane	GO:0005730:cellular_component:nucleolus	GO:0044822:molecular_function:poly(A) RNA binding	GO:0001649:biological_process:osteoblast differentiation	GO:0042981:biological_process:regulation of apoptotic process	GO:2000772:biological_process:regulation of cellular senescence	GO:0032880:biological_process:regulation of protein localization
Locus_24558.0|BlastHit|gi|123908106|sp|Q4KMD7.1|STPAP_DANRE	7081	GO:0016607:cellular_component:nuclear speck	GO:0005730:cellular_component:nucleolus	GO:0005524:molecular_function:ATP binding	GO:0046872:molecular_function:metal ion binding	GO:0003730:molecular_function:mRNA 3'-UTR binding	GO:0004652:molecular_function:polynucleotide adenylyltransferase activity	GO:0003723:molecular_function:RNA binding	GO:0050265:molecular_function:RNA uridylyltransferase activity	GO:0006379:biological_process:mRNA cleavage	GO:0006378:biological_process:mRNA polyadenylation	GO:0016180:biological_process:snRNA processing
Locus_24565.0|BlastHit|gi|548941|sp|P36975.1|SNP25_DROME	7085	GO:0030054:cellular_component:cell junction	GO:0005737:cellular_component:cytoplasm	GO:0016020:cellular_component:membrane	GO:0005886:cellular_component:plasma membrane	GO:0031201:cellular_component:SNARE complex	GO:0043195:cellular_component:terminal bouton	GO:0005484:molecular_function:SNAP receptor activity	GO:0000149:molecular_function:SNARE binding	GO:0006893:biological_process:Golgi to plasma membrane transport	GO:0007274:biological_process:neuromuscular synaptic transmission	GO:0007269:biological_process:neurotransmitter secretion	GO:0048172:biological_process:regulation of short-term neuronal synaptic plasticity	GO:0016081:biological_process:synaptic vesicle docking	GO:0031629:biological_process:synaptic vesicle fusion to presynaptic membrane	GO:0016082:biological_process:synaptic vesicle priming	GO:0048489:biological_process:synaptic vesicle transport	GO:0006906:biological_process:vesicle fusion	GO:0016192:biological_process:vesicle-mediated transport
Locus_24567.1|BlastHit|gi|1729925|sp|Q05187.1|TGMH_TACTR	7088	GO:0016020:cellular_component:membrane	GO:0046872:molecular_function:metal ion binding	GO:0003810:molecular_function:protein-glutamine gamma-glutamyltransferase activity	GO:0018149:biological_process:peptide cross-linking
Locus_24580.0|BlastHit|gi|51701693|sp|Q9D0U6.1|MAF1_MOUSE	7105	GO:0030424:cellular_component:axon	GO:0005829:cellular_component:cytosol	GO:0030425:cellular_component:dendrite	GO:0060077:cellular_component:inhibitory synapse	GO:0005634:cellular_component:nucleus	GO:0005886:cellular_component:plasma membrane	GO:0001030:molecular_function:RNA polymerase III type 1 promoter DNA binding	GO:0001031:molecular_function:RNA polymerase III type 2 promoter DNA binding	GO:0001032:molecular_function:RNA polymerase III type 3 promoter DNA binding	GO:0016480:biological_process:negative regulation of transcription from RNA polymerase III promoter	GO:0006351:biological_process:transcription, DNA-templated
Locus_24581.0|BlastHit|gi|172048656|sp|A8YXY3.2|SEP15_BOVIN	7106	GO:0005788:cellular_component:endoplasmic reticulum lumen
Locus_24583.0|BlastHit|gi|31340522|sp|P36241.2|RL19_DROME	7108	GO:0005840:cellular_component:ribosome	GO:0003735:molecular_function:structural constituent of ribosome	GO:0051298:biological_process:centrosome duplication	GO:0000022:biological_process:mitotic spindle elongation	GO:0006412:biological_process:translation
Locus_24592.0|BlastHit|gi|73917752|sp|Q5XGW6.1|CHM4B_XENLA	7119	GO:0005829:cellular_component:cytosol	GO:0031902:cellular_component:late endosome membrane	GO:0015031:biological_process:protein transport
Locus_24595.0|BlastHit|gi|68565322|sp|Q9NPB0.1|SMDC1_HUMAN	7122	GO:0030659:cellular_component:cytoplasmic vesicle membrane	GO:0016021:cellular_component:integral component of membrane	GO:0043231:cellular_component:intracellular membrane-bounded organelle
Locus_24608.1|BlastHit|gi|461857|sp|Q00871.1|CTRB1_PENVA	7130	GO:0005615:cellular_component:extracellular space	GO:0004252:molecular_function:serine-type endopeptidase activity	GO:0030574:biological_process:collagen catabolic process
Locus_24630.0|BlastHit|gi|12585496|sp|Q9U516.1|ASTER_MANSE	7146	GO:0016021:cellular_component:integral component of membrane
Locus_24632.0|BlastHit|gi|74921277|sp|Q7QB13.2|CCNC_ANOGA	7147	GO:0016591:cellular_component:DNA-directed RNA polymerase II, holoenzyme	GO:0000079:biological_process:regulation of cyclin-dependent protein serine/threonine kinase activity	GO:0006355:biological_process:regulation of transcription, DNA-templated	GO:0006351:biological_process:transcription, DNA-templated
Locus_24639.0|BlastHit|gi|75026432|sp|Q9V7U0.1|RESIL_DROME	7156	GO:0031012:cellular_component:extracellular matrix	GO:0005576:cellular_component:extracellular region	GO:0032992:cellular_component:protein-carbohydrate complex	GO:0008061:molecular_function:chitin binding	GO:0030023:molecular_function:extracellular matrix constituent conferring elasticity	GO:0008010:molecular_function:structural constituent of chitin-based larval cuticle	GO:0042302:molecular_function:structural constituent of cuticle	GO:0040003:biological_process:chitin-based cuticle development
Locus_24639.0|BlastHit|gi|75026432|sp|Q9V7U0.1|RESIL_DROME	7157	GO:0031012:cellular_component:extracellular matrix	GO:0005576:cellular_component:extracellular region	GO:0032992:cellular_component:protein-carbohydrate complex	GO:0008061:molecular_function:chitin binding	GO:0030023:molecular_function:extracellular matrix constituent conferring elasticity	GO:0008010:molecular_function:structural constituent of chitin-based larval cuticle	GO:0042302:molecular_function:structural constituent of cuticle	GO:0040003:biological_process:chitin-based cuticle development
Locus_24658.0|BlastHit|gi|82179924|sp|Q5U3N5.1|PPTC7_DANRE	7168	GO:0046872:molecular_function:metal ion binding	GO:0004721:molecular_function:phosphoprotein phosphatase activity
Locus_24659.0|BlastHit|gi|108884834|sp|Q13895.3|BYST_HUMAN	7169	GO:0045177:cellular_component:apical part of cell	GO:0005737:cellular_component:cytoplasm	GO:0016020:cellular_component:membrane	GO:0005730:cellular_component:nucleolus	GO:0044822:molecular_function:poly(A) RNA binding	GO:0008283:biological_process:cell proliferation	GO:0000462:biological_process:maturation of SSU-rRNA from tricistronic rRNA transcript (SSU-rRNA, 5.8S rRNA, LSU-rRNA)	GO:0001829:biological_process:trophectodermal cell differentiation
Locus_24663.0|BlastHit|gi|74872369|sp|Q9W2H1.1|TM2D1_DROME	7172	GO:0016021:cellular_component:integral component of membrane
Locus_24668.0|BlastHit|gi|46577123|sp|Q9GZU8.1|F192A_HUMAN	7173	GO:0005634:cellular_component:nucleus
Locus_24673.0|BlastHit|gi|83305815|sp|P31629.2|ZEP2_HUMAN	7176	GO:0005634:cellular_component:nucleus	GO:0003677:molecular_function:DNA binding	GO:0046872:molecular_function:metal ion binding	GO:0006355:biological_process:regulation of transcription, DNA-templated	GO:0006351:biological_process:transcription, DNA-templated
Locus_24681.0|BlastHit|gi|21542002|sp|Q24740.1|CDC37_DROVI	7180	GO:0005737:cellular_component:cytoplasm
Locus_24683.0|BlastHit|gi|32129447|sp|Q99LM2.1|CK5P3_MOUSE	7181	GO:0045944:biological_process:positive regulation of transcription from RNA polymerase II promoter	GO:0071569:biological_process:protein ufmylation	GO:0000079:biological_process:regulation of cyclin-dependent protein serine/threonine kinase activity
Locus_24686.0|BlastHit|gi|73621980|sp|Q13641.1|TPBG_HUMAN	7183	GO:0009986:cellular_component:cell surface	GO:0005783:cellular_component:endoplasmic reticulum	GO:0005887:cellular_component:integral component of plasma membrane	GO:0007155:biological_process:cell adhesion
Locus_24688.1|BlastHit|gi|82104700|sp|Q8QG61.1|CRY1_CHICK	7184	GO:0005737:cellular_component:cytoplasm	GO:0005634:cellular_component:nucleus	GO:0003913:molecular_function:DNA photolyase activity	GO:0000166:molecular_function:nucleotide binding	GO:0009881:molecular_function:photoreceptor activity	GO:0006281:biological_process:DNA repair	GO:0018298:biological_process:protein-chromophore linkage	GO:0006355:biological_process:regulation of transcription, DNA-templated	GO:0048511:biological_process:rhythmic process	GO:0006351:biological_process:transcription, DNA-templated
Locus_24689.0|BlastHit|gi|73921209|sp|Q9NV92.2|NFIP2_HUMAN	7185	GO:0005737:cellular_component:cytoplasm	GO:0005783:cellular_component:endoplasmic reticulum	GO:0005794:cellular_component:Golgi apparatus	GO:0000139:cellular_component:Golgi membrane	GO:0016021:cellular_component:integral component of membrane	GO:0043231:cellular_component:intracellular membrane-bounded organelle	GO:0005739:cellular_component:mitochondrion	GO:0032585:cellular_component:multivesicular body membrane	GO:0048471:cellular_component:perinuclear region of cytoplasm	GO:0004871:molecular_function:signal transducer activity	GO:0050699:molecular_function:WW domain binding	GO:0010629:biological_process:negative regulation of gene expression	GO:0051224:biological_process:negative regulation of protein transport	GO:0032410:biological_process:negative regulation of transporter activity	GO:0043123:biological_process:positive regulation of I-kappaB kinase/NF-kappaB signaling	GO:0031398:biological_process:positive regulation of protein ubiquitination	GO:0007165:biological_process:signal transduction
Locus_24737.0|BlastHit|gi|6174942|sp|Q94920.3|VDAC_DROME	7218	GO:0005811:cellular_component:lipid particle	GO:0005875:cellular_component:microtubule associated complex	GO:0005741:cellular_component:mitochondrial outer membrane	GO:0005739:cellular_component:mitochondrion	GO:0016006:cellular_component:Nebenkern	GO:0046930:cellular_component:pore complex	GO:0015288:molecular_function:porin activity	GO:0008308:molecular_function:voltage-gated anion channel activity	GO:0006811:biological_process:ion transport	GO:0007005:biological_process:mitochondrion organization	GO:0007602:biological_process:phototransduction	GO:0007291:biological_process:sperm individualization	GO:0030382:biological_process:sperm mitochondrion organization
Locus_24750.0|BlastHit|gi|66773867|sp|Q5RA17.1|RRP7A_PONAB	7221	GO:0000166:molecular_function:nucleotide binding	GO:0044822:molecular_function:poly(A) RNA binding
Locus_24765.0|BlastHit|gi|67461064|sp|Q90744.1|NAGAB_CHICK	7230	GO:0005764:cellular_component:lysosome	GO:0008456:molecular_function:alpha-N-acetylgalactosaminidase activity	GO:0005975:biological_process:carbohydrate metabolic process
Locus_24772.0|BlastHit|gi|585110|sp|P38117.3|ETFB_HUMAN	7236	GO:0070062:cellular_component:extracellular vesicular exosome	GO:0043231:cellular_component:intracellular membrane-bounded organelle	GO:0005759:cellular_component:mitochondrial matrix	GO:0005739:cellular_component:mitochondrion	GO:0009055:molecular_function:electron carrier activity	GO:0044237:biological_process:cellular metabolic process	GO:0022904:biological_process:respiratory electron transport chain	GO:0044281:biological_process:small molecule metabolic process
Locus_24783.0|BlastHit|gi|82176771|sp|Q7ZYA2.1|TAF8_XENLA	7242	GO:0005737:cellular_component:cytoplasm	GO:0005634:cellular_component:nucleus	GO:0030154:biological_process:cell differentiation	GO:0007275:biological_process:multicellular organismal development	GO:0006355:biological_process:regulation of transcription, DNA-templated	GO:0006351:biological_process:transcription, DNA-templated
Locus_24789.0|BlastHit|gi|18202518|sp|Q23983.1|SNAP_DROME	7245	GO:0043679:cellular_component:axon terminus	GO:0005737:cellular_component:cytoplasm	GO:0016023:cellular_component:cytoplasmic membrane-bounded vesicle	GO:0031410:cellular_component:cytoplasmic vesicle	GO:0016020:cellular_component:membrane	GO:0043195:cellular_component:terminal bouton	GO:0000149:molecular_function:SNARE binding	GO:0005483:molecular_function:soluble NSF attachment protein activity	GO:0001745:biological_process:compound eye morphogenesis	GO:0048526:biological_process:imaginal disc-derived wing expansion	GO:0006891:biological_process:intra-Golgi vesicle-mediated transport	GO:0006886:biological_process:intracellular protein transport	GO:0000281:biological_process:mitotic cytokinesis	GO:0007274:biological_process:neuromuscular synaptic transmission	GO:0048812:biological_process:neuron projection morphogenesis	GO:0007269:biological_process:neurotransmitter secretion	GO:0006909:biological_process:phagocytosis	GO:0035540:biological_process:positive regulation of SNARE complex disassembly	GO:0007268:biological_process:synaptic transmission	GO:0031629:biological_process:synaptic vesicle fusion to presynaptic membrane	GO:0016082:biological_process:synaptic vesicle priming
Locus_24789.0|BlastHit|gi|18202518|sp|Q23983.1|SNAP_DROME	7246	GO:0043679:cellular_component:axon terminus	GO:0005737:cellular_component:cytoplasm	GO:0016023:cellular_component:cytoplasmic membrane-bounded vesicle	GO:0031410:cellular_component:cytoplasmic vesicle	GO:0016020:cellular_component:membrane	GO:0043195:cellular_component:terminal bouton	GO:0000149:molecular_function:SNARE binding	GO:0005483:molecular_function:soluble NSF attachment protein activity	GO:0001745:biological_process:compound eye morphogenesis	GO:0048526:biological_process:imaginal disc-derived wing expansion	GO:0006891:biological_process:intra-Golgi vesicle-mediated transport	GO:0006886:biological_process:intracellular protein transport	GO:0000281:biological_process:mitotic cytokinesis	GO:0007274:biological_process:neuromuscular synaptic transmission	GO:0048812:biological_process:neuron projection morphogenesis	GO:0007269:biological_process:neurotransmitter secretion	GO:0006909:biological_process:phagocytosis	GO:0035540:biological_process:positive regulation of SNARE complex disassembly	GO:0007268:biological_process:synaptic transmission	GO:0031629:biological_process:synaptic vesicle fusion to presynaptic membrane	GO:0016082:biological_process:synaptic vesicle priming
Locus_24791.0|BlastHit|gi|13124018|sp|O97159.2|CHDM_DROME	7248	GO:0005634:cellular_component:nucleus	GO:0016581:cellular_component:NuRD complex	GO:0005700:cellular_component:polytene chromosome	GO:0005524:molecular_function:ATP binding	GO:0004003:molecular_function:ATP-dependent DNA helicase activity	GO:0016887:molecular_function:ATPase activity	GO:0003682:molecular_function:chromatin binding	GO:0003677:molecular_function:DNA binding	GO:0004386:molecular_function:helicase activity	GO:0031491:molecular_function:nucleosome binding	GO:0008270:molecular_function:zinc ion binding	GO:0006200:biological_process:ATP catabolic process	GO:0048813:biological_process:dendrite morphogenesis	GO:0032508:biological_process:DNA duplex unwinding	GO:0007517:biological_process:muscle organ development	GO:0071923:biological_process:negative regulation of cohesin localization to chromatin	GO:0000122:biological_process:negative regulation of transcription from RNA polymerase II promoter	GO:0045892:biological_process:negative regulation of transcription, DNA-templated	GO:0042766:biological_process:nucleosome mobilization	GO:0006357:biological_process:regulation of transcription from RNA polymerase II promoter	GO:0007283:biological_process:spermatogenesis	GO:0006351:biological_process:transcription, DNA-templated
Locus_24804.0|BlastHit|gi|334302830|sp|Q8TF66.2|LRC15_HUMAN	7257	GO:0005576:cellular_component:extracellular region
Locus_24805.0|BlastHit|gi|75042696|sp|Q5RFT1.1|CB018_PONAB	7258	GO:0016021:cellular_component:integral component of membrane	GO:0005765:cellular_component:lysosomal membrane	GO:0005739:cellular_component:mitochondrion	GO:1901029:biological_process:negative regulation of mitochondrial outer membrane permeabilization involved in apoptotic signaling pathway	GO:0008284:biological_process:positive regulation of cell proliferation	GO:0006810:biological_process:transport
Locus_24811.0|BlastHit|gi|74750895|sp|Q8N1G4.1|LRC47_HUMAN	7264	GO:0004826:molecular_function:phenylalanine-tRNA ligase activity	GO:0003723:molecular_function:RNA binding
Locus_24812.0|BlastHit|gi|62287121|sp|Q99MZ7.1|PECR_MOUSE	7265	GO:0043231:cellular_component:intracellular membrane-bounded organelle	GO:0005739:cellular_component:mitochondrion	GO:0005778:cellular_component:peroxisomal membrane	GO:0005777:cellular_component:peroxisome	GO:0005102:molecular_function:receptor binding	GO:0019166:molecular_function:trans-2-enoyl-CoA reductase (NADPH) activity	GO:0006633:biological_process:fatty acid biosynthetic process	GO:0055114:biological_process:oxidation-reduction process	GO:0033306:biological_process:phytol metabolic process
Locus_24836.0|BlastHit|gi|2499317|sp|Q63362.3|NDUA5_RAT	7273	GO:0005747:cellular_component:mitochondrial respiratory chain complex I	GO:0008137:molecular_function:NADH dehydrogenase (ubiquinone) activity	GO:0022904:biological_process:respiratory electron transport chain
Locus_24874.0|BlastHit|gi|62900713|sp|Q9VJQ5.1|NC2B_DROME	7292	GO:0005671:cellular_component:Ada2/Gcn5/Ada3 transcription activator complex	GO:0005634:cellular_component:nucleus	GO:0043565:molecular_function:sequence-specific DNA binding	GO:0008134:molecular_function:transcription factor binding	GO:0006338:biological_process:chromatin remodeling	GO:0016573:biological_process:histone acetylation	GO:0000122:biological_process:negative regulation of transcription from RNA polymerase II promoter	GO:0045892:biological_process:negative regulation of transcription, DNA-templated	GO:0042766:biological_process:nucleosome mobilization	GO:0045944:biological_process:positive regulation of transcription from RNA polymerase II promoter	GO:0045893:biological_process:positive regulation of transcription, DNA-templated	GO:0051123:biological_process:RNA polymerase II transcriptional preinitiation complex assembly
Locus_24896.0|BlastHit|gi|7676152|sp|P12310.2|DHG_BACSU	7300	GO:0047936:molecular_function:glucose 1-dehydrogenase [NAD(P)] activity	GO:0030435:biological_process:sporulation resulting in formation of a cellular spore
Locus_24899.0|BlastHit|gi|47117660|sp|P61209.2|ARF1_DROME	7301	GO:0005794:cellular_component:Golgi apparatus	GO:0005525:molecular_function:GTP binding	GO:0015031:biological_process:protein transport	GO:0007264:biological_process:small GTPase mediated signal transduction	GO:0016192:biological_process:vesicle-mediated transport
Locus_24912.0|BlastHit|gi|74869864|sp|Q9VM71.2|XRN2_DROME	7303	GO:0005634:cellular_component:nucleus	GO:0008409:molecular_function:5'-3' exonuclease activity	GO:0004534:molecular_function:5'-3' exoribonuclease activity	GO:0046872:molecular_function:metal ion binding	GO:0003676:molecular_function:nucleic acid binding	GO:0000738:biological_process:DNA catabolic process, exonucleolytic	GO:0006353:biological_process:DNA-templated transcription, termination	GO:0006397:biological_process:mRNA processing	GO:0022008:biological_process:neurogenesis	GO:0006355:biological_process:regulation of transcription, DNA-templated
Locus_24922.0|BlastHit|gi|45477220|sp|O88280.1|SLIT3_RAT	7309	GO:0005576:cellular_component:extracellular region	GO:0016020:cellular_component:membrane	GO:0005509:molecular_function:calcium ion binding	GO:0007420:biological_process:brain development	GO:0030154:biological_process:cell differentiation	GO:0021510:biological_process:spinal cord development
Locus_24953.0|BlastHit|gi|38258607|sp|Q8IH24.2|MED31_DROME	7322	GO:0008234:molecular_function:cysteine-type peptidase activity
Locus_24953.0|BlastHit|gi|38258607|sp|Q8IH24.2|MED31_DROME	7322	GO:0016592:cellular_component:mediator complex	GO:0005634:cellular_component:nucleus	GO:0001104:molecular_function:RNA polymerase II transcription cofactor activity	GO:0008595:biological_process:anterior/posterior axis specification, embryo	GO:0006357:biological_process:regulation of transcription from RNA polymerase II promoter	GO:0006367:biological_process:transcription initiation from RNA polymerase II promoter
Locus_24958.0|BlastHit|gi|62511114|sp|Q7TNE3.1|SPAG7_MOUSE	7325	GO:0005634:cellular_component:nucleus	GO:0003676:molecular_function:nucleic acid binding
Locus_24962.1|BlastHit|gi|2500792|sp|Q25479.1|NKCL_MANSE	7330	GO:0016021:cellular_component:integral component of membrane	GO:0015377:molecular_function:cation:chloride symporter activity	GO:0006813:biological_process:potassium ion transport	GO:0006814:biological_process:sodium ion transport
Locus_24977.0|BlastHit|gi|29427572|sp|O61369.1|PICO_DROAN	7345	GO:0016021:cellular_component:integral component of membrane	GO:0015114:molecular_function:phosphate ion transmembrane transporter activity	GO:0015293:molecular_function:symporter activity	GO:0006814:biological_process:sodium ion transport
Locus_24982.1|BlastHit|gi|232285|sp|P08108.2|HSP70_ONCMY	7351	GO:0004352:molecular_function:glutamate dehydrogenase (NAD+) activity
Locus_24982.1|BlastHit|gi|232285|sp|P08108.2|HSP70_ONCMY	7351	GO:0005524:molecular_function:ATP binding
Locus_25002.0|BlastHit|gi|93141237|sp|P53569.2|CEBPZ_MOUSE	7377	GO:0005634:cellular_component:nucleus	GO:0044822:molecular_function:poly(A) RNA binding	GO:0000978:molecular_function:RNA polymerase II core promoter proximal region sequence-specific DNA binding	GO:0001077:molecular_function:RNA polymerase II core promoter proximal region sequence-specific DNA binding transcription factor activity involved in positive regulation of transcription
Locus_25003.0|BlastHit|gi|2842718|sp|Q93113.1|GST1D_ANOGA	7378	GO:0018833:molecular_function:DDT-dehydrochlorinase activity	GO:0004364:molecular_function:glutathione transferase activity
Locus_25004.1|BlastHit|gi|91207411|sp|Q3TXS7.1|PSMD1_MOUSE	7379	GO:0005839:cellular_component:proteasome core complex	GO:0005838:cellular_component:proteasome regulatory particle	GO:0008540:cellular_component:proteasome regulatory particle, base subcomplex	GO:0030234:molecular_function:enzyme regulator activity	GO:0006974:biological_process:cellular response to DNA damage stimulus	GO:0043161:biological_process:proteasome-mediated ubiquitin-dependent protein catabolic process	GO:0006508:biological_process:proteolysis	GO:0042176:biological_process:regulation of protein catabolic process
Locus_25004.1|BlastHit|gi|91207411|sp|Q3TXS7.1|PSMD1_MOUSE	7379	GO:0016787:molecular_function:hydrolase activity	GO:0046872:molecular_function:metal ion binding
Locus_25035.0|BlastHit|gi|46395930|sp|Q91ZW9.1|C209C_MOUSE	7401	GO:0016021:cellular_component:integral component of membrane	GO:0030246:molecular_function:carbohydrate binding	GO:0050832:biological_process:defense response to fungus	GO:0045087:biological_process:innate immune response	GO:0050715:biological_process:positive regulation of cytokine secretion	GO:0043123:biological_process:positive regulation of I-kappaB kinase/NF-kappaB signaling
Locus_25036.0|BlastHit|gi|82181398|sp|Q66JG5.1|TADA3_XENTR	7402	GO:0005634:cellular_component:nucleus	GO:0006355:biological_process:regulation of transcription, DNA-templated	GO:0006351:biological_process:transcription, DNA-templated
Locus_25039.0|BlastHit|gi|81870728|sp|Q6PTT0.1|ACY1B_RAT	7406	GO:0005737:cellular_component:cytoplasm	GO:0004046:molecular_function:aminoacylase activity	GO:0046872:molecular_function:metal ion binding	GO:0008237:molecular_function:metallopeptidase activity	GO:0006520:biological_process:cellular amino acid metabolic process	GO:0030163:biological_process:protein catabolic process
Locus_25044.0|BlastHit|gi|75041134|sp|Q5R5N4.1|MTL14_PONAB	7409	GO:0036396:cellular_component:MIS complex	GO:0005634:cellular_component:nucleus	GO:0016422:molecular_function:mRNA (2'-O-methyladenosine-N6-)-methyltransferase activity	GO:0003723:molecular_function:RNA binding	GO:0061157:biological_process:mRNA destabilization	GO:0080009:biological_process:mRNA methylation	GO:0001510:biological_process:RNA methylation	GO:0019827:biological_process:stem cell maintenance
Locus_25046.0|BlastHit|gi|341940993|sp|Q9Z2L6.3|MINP1_MOUSE	7411	GO:0005788:cellular_component:endoplasmic reticulum lumen	GO:0070062:cellular_component:extracellular vesicular exosome	GO:0005886:cellular_component:plasma membrane	GO:0003993:molecular_function:acid phosphatase activity	GO:0034417:molecular_function:bisphosphoglycerate 3-phosphatase activity	GO:0052826:molecular_function:inositol hexakisphosphate 2-phosphatase activity
Locus_25051.0|BlastHit|gi|3024356|sp|P81057.1|PEN2A_LITVA	7421	GO:0005737:cellular_component:cytoplasm	GO:0008061:molecular_function:chitin binding	GO:0042742:biological_process:defense response to bacterium	GO:0050832:biological_process:defense response to fungus	GO:0031640:biological_process:killing of cells of other organism
Locus_25051.0|BlastHit|gi|3024418|sp|P81060.1|PEN3C_LITVA	7418	GO:0005737:cellular_component:cytoplasm	GO:0008061:molecular_function:chitin binding	GO:0042742:biological_process:defense response to bacterium	GO:0050832:biological_process:defense response to fungus	GO:0031640:biological_process:killing of cells of other organism
Locus_25069.0|BlastHit|gi|73621844|sp|Q9DBE9.1|RRMJ3_MOUSE	7461	GO:0005730:cellular_component:nucleolus	GO:0030688:cellular_component:preribosome, small subunit precursor	GO:0044822:molecular_function:poly(A) RNA binding	GO:0008649:molecular_function:rRNA methyltransferase activity	GO:0000453:biological_process:enzyme-directed rRNA 2'-O-methylation
Locus_25081.0|BlastHit|gi|2842670|sp|Q64424.1|LIPR2_MYOCO	7471	GO:0005615:cellular_component:extracellular space	GO:0047372:molecular_function:acylglycerol lipase activity	GO:0005509:molecular_function:calcium ion binding	GO:0047714:molecular_function:galactolipase activity	GO:0004620:molecular_function:phospholipase activity	GO:0004806:molecular_function:triglyceride lipase activity	GO:0019376:biological_process:galactolipid catabolic process	GO:0009395:biological_process:phospholipid catabolic process
Locus_25102.0|BlastHit|gi|17865628|sp|Q9PUN2.1|SMUF1_XENLA	7488	GO:0005737:cellular_component:cytoplasm	GO:0045121:cellular_component:membrane raft	GO:0005634:cellular_component:nucleus	GO:0005886:cellular_component:plasma membrane	GO:0016874:molecular_function:ligase activity	GO:0004842:molecular_function:ubiquitin-protein transferase activity
Locus_25107.0|BlastHit|gi|74625830|sp|Q9US35.1|DSD1_SCHPO	7493	GO:0005829:cellular_component:cytosol	GO:0005634:cellular_component:nucleus	GO:0008784:molecular_function:alanine racemase activity	GO:0008721:molecular_function:D-serine ammonia-lyase activity	GO:0071852:biological_process:fungal-type cell wall organization or biogenesis	GO:0008152:biological_process:metabolic process
Locus_25120.0|BlastHit|gi|109917954|sp|Q2M2S8.1|ALKB7_BOVIN	7505	GO:0005759:cellular_component:mitochondrial matrix	GO:0051213:molecular_function:dioxygenase activity	GO:0046872:molecular_function:metal ion binding	GO:0006974:biological_process:cellular response to DNA damage stimulus	GO:0006631:biological_process:fatty acid metabolic process	GO:0010883:biological_process:regulation of lipid storage	GO:1902445:biological_process:regulation of mitochondrial membrane permeability involved in programmed necrotic cell death
Locus_25122.0|BlastHit|gi|46576203|sp|Q9GLN5.1|BIRC5_PIG	7506	GO:0005814:cellular_component:centriole	GO:0032133:cellular_component:chromosome passenger complex	GO:0000775:cellular_component:chromosome, centromeric region	GO:0000777:cellular_component:condensed chromosome kinetochore	GO:0005737:cellular_component:cytoplasm	GO:0005881:cellular_component:cytoplasmic microtubule	GO:0005829:cellular_component:cytosol	GO:0031021:cellular_component:interphase microtubule organizing center	GO:0030496:cellular_component:midbody	GO:0005634:cellular_component:nucleus	GO:0005876:cellular_component:spindle microtubule	GO:0048037:molecular_function:cofactor binding	GO:0043027:molecular_function:cysteine-type endopeptidase inhibitor activity involved in apoptotic process	GO:0008017:molecular_function:microtubule binding	GO:0042803:molecular_function:protein homodimerization activity	GO:0015631:molecular_function:tubulin binding	GO:0008270:molecular_function:zinc ion binding	GO:0051301:biological_process:cell division	GO:0007059:biological_process:chromosome segregation	GO:0000910:biological_process:cytokinesis	GO:0051303:biological_process:establishment of chromosome localization	GO:0000086:biological_process:G2/M transition of mitotic cell cycle	GO:0007067:biological_process:mitotic nuclear division	GO:0043066:biological_process:negative regulation of apoptotic process	GO:0043154:biological_process:negative regulation of cysteine-type endopeptidase activity involved in apoptotic process	GO:0045892:biological_process:negative regulation of transcription, DNA-templated	GO:0031536:biological_process:positive regulation of exit from mitosis	GO:0045931:biological_process:positive regulation of mitotic cell cycle	GO:0031503:biological_process:protein complex localization	GO:0006468:biological_process:protein phosphorylation	GO:0031577:biological_process:spindle checkpoint	GO:0006351:biological_process:transcription, DNA-templated
Locus_25143.0|BlastHit|gi|82182030|sp|Q6AZN4.1|RM15_XENLA	7542	GO:0015934:cellular_component:large ribosomal subunit	GO:0005739:cellular_component:mitochondrion	GO:0003735:molecular_function:structural constituent of ribosome	GO:0006412:biological_process:translation
Locus_25154.0|BlastHit|gi|82237357|sp|Q6NYZ6.1|SCM2A_DANRE	7547	GO:0016021:cellular_component:integral component of membrane	GO:0005743:cellular_component:mitochondrial inner membrane	GO:0005509:molecular_function:calcium ion binding	GO:0055085:biological_process:transmembrane transport
Locus_25161.0|BlastHit|gi|322518375|sp|E1C231.1|LTN1_CHICK	7550	GO:0016874:molecular_function:ligase activity	GO:0004842:molecular_function:ubiquitin-protein transferase activity	GO:0008270:molecular_function:zinc ion binding	GO:0051865:biological_process:protein autoubiquitination
Locus_25165.0|BlastHit|gi|45477086|sp|Q61469.1|LPP1_MOUSE	7553	GO:0045177:cellular_component:apical part of cell	GO:0016021:cellular_component:integral component of membrane	GO:0005918:cellular_component:septate junction	GO:0016791:molecular_function:phosphatase activity	GO:0008195:molecular_function:phosphatidate phosphatase activity	GO:0042803:molecular_function:protein homodimerization activity	GO:0050829:biological_process:defense response to Gram-negative bacterium	GO:0016311:biological_process:dephosphorylation	GO:0035234:biological_process:ectopic germ cell programmed cell death	GO:0009880:biological_process:embryonic pattern specification	GO:0008354:biological_process:germ cell migration	GO:0035233:biological_process:germ cell repulsion	GO:0045824:biological_process:negative regulation of innate immune response	GO:0007424:biological_process:open tracheal system development	GO:0007280:biological_process:pole cell migration	GO:0019991:biological_process:septate junction assembly
Locus_25169.0|BlastHit|gi|81175190|sp|P40797.2|PNUT_DROME	7555	GO:0016324:cellular_component:apical plasma membrane	GO:0032154:cellular_component:cleavage furrow	GO:0045172:cellular_component:germline ring canal	GO:0005875:cellular_component:microtubule associated complex	GO:0005739:cellular_component:mitochondrion	GO:0005886:cellular_component:plasma membrane	GO:0031105:cellular_component:septin complex	GO:0005940:cellular_component:septin ring	GO:0003779:molecular_function:actin binding	GO:0005525:molecular_function:GTP binding	GO:0003924:molecular_function:GTPase activity	GO:0008017:molecular_function:microtubule binding	GO:0031625:molecular_function:ubiquitin protein ligase binding	GO:0000915:biological_process:actomyosin contractile ring assembly	GO:0006915:biological_process:apoptotic process	GO:0007349:biological_process:cellularization	GO:0006184:biological_process:GTP catabolic process	GO:0000281:biological_process:mitotic cytokinesis	GO:0043065:biological_process:positive regulation of apoptotic process
Locus_25170.0|BlastHit|gi|73620960|sp|Q24324.2|DSOR1_DROME	7556	GO:0005524:molecular_function:ATP binding	GO:0004708:molecular_function:MAP kinase kinase activity	GO:0004713:molecular_function:protein tyrosine kinase activity	GO:0004702:molecular_function:receptor signaling protein serine/threonine kinase activity	GO:0000187:biological_process:activation of MAPK activity	GO:0008595:biological_process:anterior/posterior axis specification, embryo	GO:0007298:biological_process:border follicle cell migration	GO:0042386:biological_process:hemocyte differentiation	GO:0000165:biological_process:MAPK cascade	GO:0070374:biological_process:positive regulation of ERK1 and ERK2 cascade	GO:0046579:biological_process:positive regulation of Ras protein signal transduction	GO:0006468:biological_process:protein phosphorylation	GO:0007165:biological_process:signal transduction	GO:0007362:biological_process:terminal region determination
Locus_25172.0|BlastHit|gi|30580379|sp|Q9NP79.1|VTA1_HUMAN	7557	GO:0010008:cellular_component:endosome membrane	GO:0015031:biological_process:protein transport
Locus_25204.0|BlastHit|gi|23396477|sp|O95563.1|BR44_HUMAN	7577	GO:0016021:cellular_component:integral component of membrane	GO:0005743:cellular_component:mitochondrial inner membrane	GO:0005739:cellular_component:mitochondrion	GO:0005634:cellular_component:nucleus	GO:0050833:molecular_function:pyruvate transmembrane transporter activity	GO:0044237:biological_process:cellular metabolic process	GO:0006850:biological_process:mitochondrial pyruvate transport	GO:0006090:biological_process:pyruvate metabolic process	GO:0044281:biological_process:small molecule metabolic process
Locus_25215.0|BlastHit|gi|82178178|sp|Q567Z6.1|CRIPT_DANRE	7581	GO:0005737:cellular_component:cytoplasm
Locus_25223.0|BlastHit|gi|3914156|sp|O44081.1|DKC1_DROME	7587	GO:0005730:cellular_component:nucleolus	GO:0030529:cellular_component:ribonucleoprotein complex	GO:0009982:molecular_function:pseudouridine synthase activity	GO:0003723:molecular_function:RNA binding	GO:0007281:biological_process:germ cell development	GO:0022008:biological_process:neurogenesis	GO:0001522:biological_process:pseudouridine synthesis	GO:0042254:biological_process:ribosome biogenesis	GO:0006364:biological_process:rRNA processing	GO:0035220:biological_process:wing disc development
Locus_25239.0|BlastHit|gi|82181458|sp|Q66KB9.1|BL1S2_XENTR	7599	GO:0031083:cellular_component:BLOC-1 complex	GO:0042803:molecular_function:protein homodimerization activity
Locus_25243.0|BlastHit|gi|114152848|sp|Q94407.3|NHR48_CAEEL	7601	GO:0005634:cellular_component:nucleus	GO:0043565:molecular_function:sequence-specific DNA binding	GO:0003700:molecular_function:sequence-specific DNA binding transcription factor activity	GO:0003707:molecular_function:steroid hormone receptor activity	GO:0008270:molecular_function:zinc ion binding	GO:0006351:biological_process:transcription, DNA-templated
Locus_25253.0|BlastHit|gi|81900425|sp|Q8CHP8.1|PGP_MOUSE	7607	GO:0000287:molecular_function:magnesium ion binding	GO:0098519:molecular_function:nucleotide phosphatase activity, acting on free nucleotides	GO:0008967:molecular_function:phosphoglycolate phosphatase activity	GO:0004725:molecular_function:protein tyrosine phosphatase activity	GO:0005975:biological_process:carbohydrate metabolic process	GO:0016311:biological_process:dephosphorylation	GO:0035335:biological_process:peptidyl-tyrosine dephosphorylation
Locus_25270.0|BlastHit|gi|27923994|sp|Q9VUJ0.2|RM39_DROME	7619	GO:0005762:cellular_component:mitochondrial large ribosomal subunit	GO:0000166:molecular_function:nucleotide binding	GO:0003735:molecular_function:structural constituent of ribosome	GO:0031047:biological_process:gene silencing by RNA	GO:0006417:biological_process:regulation of translation	GO:0006412:biological_process:translation
Locus_25271.0|BlastHit|gi|82186237|sp|Q6P2X9.1|MOT12_XENTR	7620	GO:0005887:cellular_component:integral component of plasma membrane	GO:0005308:molecular_function:creatine transmembrane transporter activity	GO:0015293:molecular_function:symporter activity	GO:1902598:biological_process:creatine transmembrane transport
Locus_25296.0|BlastHit|gi|1703311|sp|P52183.1|ANNU_SCHAM	7631	GO:0005886:cellular_component:plasma membrane	GO:0046872:molecular_function:metal ion binding	GO:0003810:molecular_function:protein-glutamine gamma-glutamyltransferase activity	GO:0018149:biological_process:peptide cross-linking
Locus_25299.0|BlastHit|gi|74868572|sp|Q9VE04.1|RM55_DROME	7634	GO:0005762:cellular_component:mitochondrial large ribosomal subunit	GO:0005739:cellular_component:mitochondrion	GO:0003735:molecular_function:structural constituent of ribosome	GO:0007275:biological_process:multicellular organismal development	GO:0006412:biological_process:translation
Locus_25301.0|BlastHit|gi|122056017|sp|Q3SZZ0.1|BRX1_BOVIN	7635	GO:0005730:cellular_component:nucleolus	GO:0044822:molecular_function:poly(A) RNA binding	GO:0042254:biological_process:ribosome biogenesis
Locus_25316.0|BlastHit|gi|121993358|sp|Q29GB8.1|NAAT1_DROPS	7647	GO:0005887:cellular_component:integral component of plasma membrane	GO:0042943:molecular_function:D-amino acid transmembrane transporter activity	GO:0005328:molecular_function:neurotransmitter:sodium symporter activity	GO:0015175:molecular_function:neutral amino acid transmembrane transporter activity	GO:0005283:molecular_function:sodium:amino acid symporter activity	GO:0003333:biological_process:amino acid transmembrane transport	GO:0042940:biological_process:D-amino acid transport	GO:0015804:biological_process:neutral amino acid transport	GO:0006814:biological_process:sodium ion transport
Locus_25319.0|BlastHit|gi|1709799|sp|P54814.1|PRS8_MANSE	7649	GO:0005737:cellular_component:cytoplasm	GO:0005634:cellular_component:nucleus	GO:0000502:cellular_component:proteasome complex	GO:0005524:molecular_function:ATP binding	GO:0016787:molecular_function:hydrolase activity	GO:0030163:biological_process:protein catabolic process
Locus_25320.0|BlastHit|gi|74582008|sp|O14297.2|YF1F_SCHPO	7650	GO:0005829:cellular_component:cytosol	GO:0005634:cellular_component:nucleus
Locus_25321.0|BlastHit|gi|75075675|sp|Q4R4E1.1|PIGM_MACFA	7651	GO:0005789:cellular_component:endoplasmic reticulum membrane	GO:0016021:cellular_component:integral component of membrane	GO:0000030:molecular_function:mannosyltransferase activity	GO:0006506:biological_process:GPI anchor biosynthetic process	GO:0097502:biological_process:mannosylation
Locus_25321.0|BlastHit|gi|75075675|sp|Q4R4E1.1|PIGM_MACFA	7651	GO:0005739:cellular_component:mitochondrion	GO:0008283:biological_process:cell proliferation
Locus_25322.0|BlastHit|gi|115881|sp|P04069.1|CBPB_ASTFL	7652	GO:0005576:cellular_component:extracellular region	GO:0004181:molecular_function:metallocarboxypeptidase activity	GO:0008270:molecular_function:zinc ion binding
Locus_25345.0|BlastHit|gi|166215193|sp|Q3TAS6.2|INM02_MOUSE	7668	GO:0072546:cellular_component:ER membrane protein complex	GO:0005576:cellular_component:extracellular region	GO:0016021:cellular_component:integral component of membrane
Locus_25346.0|BlastHit|gi|17368331|sp|P82968.1|MCPI_MELCP	7669	GO:0004867:molecular_function:serine-type endopeptidase inhibitor activity
Locus_25349.0|BlastHit|gi|1706870|sp|P30043.3|BLVRB_HUMAN	7671	GO:0005737:cellular_component:cytoplasm	GO:0005829:cellular_component:cytosol	GO:0070062:cellular_component:extracellular vesicular exosome	GO:0005634:cellular_component:nucleus	GO:0005886:cellular_component:plasma membrane	GO:0004074:molecular_function:biliverdin reductase activity	GO:0042602:molecular_function:riboflavin reductase (NADPH) activity	GO:0042167:biological_process:heme catabolic process	GO:0006778:biological_process:porphyrin-containing compound metabolic process	GO:0044281:biological_process:small molecule metabolic process
Locus_25354.0|BlastHit|gi|82225271|sp|Q9YGD2.1|SUCA_COLLI	7674	GO:0005739:cellular_component:mitochondrion	GO:0003878:molecular_function:ATP citrate synthase activity	GO:0048037:molecular_function:cofactor binding	GO:0005525:molecular_function:GTP binding	GO:0004775:molecular_function:succinate-CoA ligase (ADP-forming) activity	GO:0004776:molecular_function:succinate-CoA ligase (GDP-forming) activity	GO:0022008:biological_process:neurogenesis	GO:0006099:biological_process:tricarboxylic acid cycle
Locus_25373.0|BlastHit|gi|1352723|sp|P49024.1|PAXI_CHICK	7685	GO:0005737:cellular_component:cytoplasm	GO:0005856:cellular_component:cytoskeleton	GO:0005925:cellular_component:focal adhesion	GO:0008270:molecular_function:zinc ion binding	GO:0007160:biological_process:cell-matrix adhesion
Locus_25388.0|BlastHit|gi|97072617|sp|Q287T7.1|MFRN1_DANRE	7695	GO:0016021:cellular_component:integral component of membrane	GO:0005743:cellular_component:mitochondrial inner membrane	GO:0005739:cellular_component:mitochondrion	GO:0005381:molecular_function:iron ion transmembrane transporter activity	GO:0035162:biological_process:embryonic hemopoiesis	GO:0043249:biological_process:erythrocyte maturation	GO:0055072:biological_process:iron ion homeostasis	GO:0034755:biological_process:iron ion transmembrane transport	GO:0048250:biological_process:mitochondrial iron ion transport
Locus_25399.0|BlastHit|gi|135040|sp|P07768.3|SUIS_RABIT	7702	GO:0016324:cellular_component:apical plasma membrane	GO:0016021:cellular_component:integral component of membrane	GO:0030246:molecular_function:carbohydrate binding	GO:0004574:molecular_function:oligo-1,6-glucosidase activity	GO:0004575:molecular_function:sucrose alpha-glucosidase activity	GO:0005975:biological_process:carbohydrate metabolic process
Locus_25400.0|BlastHit|gi|1350593|sp|P48148.1|RHO1_DROME	7703	GO:0045179:cellular_component:apical cortex	GO:0005938:cellular_component:cell cortex	GO:0070451:cellular_component:cell hair	GO:0005737:cellular_component:cytoplasm	GO:0005856:cellular_component:cytoskeleton	GO:0005886:cellular_component:plasma membrane	GO:0005525:molecular_function:GTP binding	GO:0003924:molecular_function:GTPase activity	GO:0019900:molecular_function:kinase binding	GO:0030036:biological_process:actin cytoskeleton organization	GO:0031532:biological_process:actin cytoskeleton reorganization	GO:0051017:biological_process:actin filament bundle assembly	GO:0007015:biological_process:actin filament organization	GO:0070252:biological_process:actin-mediated cell contraction	GO:0007411:biological_process:axon guidance	GO:0007298:biological_process:border follicle cell migration	GO:0035147:biological_process:branch fusion, open tracheal system	GO:0090254:biological_process:cell elongation involved in imaginal disc-derived wing morphogenesis	GO:0034613:biological_process:cellular protein localization	GO:0006974:biological_process:cellular response to DNA damage stimulus	GO:0007349:biological_process:cellularization	GO:0001745:biological_process:compound eye morphogenesis	GO:0030866:biological_process:cortical actin cytoskeleton organization	GO:0007010:biological_process:cytoskeleton organization	GO:0048813:biological_process:dendrite morphogenesis	GO:0070593:biological_process:dendrite self-avoidance	GO:0007368:biological_process:determination of left/right symmetry	GO:0007391:biological_process:dorsal closure	GO:0046663:biological_process:dorsal closure, leading edge cell differentiation	GO:0007395:biological_process:dorsal closure, spreading of leading edge cells	GO:0006897:biological_process:endocytosis	GO:0007173:biological_process:epidermal growth factor receptor signaling pathway
Locus_25413.0|BlastHit|gi|71153351|sp|Q5F359.1|TPPC5_CHICK	7719	GO:0005783:cellular_component:endoplasmic reticulum	GO:0005794:cellular_component:Golgi apparatus	GO:0030008:cellular_component:TRAPP complex	GO:0016192:biological_process:vesicle-mediated transport
Locus_25414.0|BlastHit|gi|123885924|sp|Q0V9J0.1|TMM69_XENTR	7720	GO:0016021:cellular_component:integral component of membrane
Locus_25418.0|BlastHit|gi|74870877|sp|Q9VTJ8.2|TIM14_DROME	7722	GO:0016021:cellular_component:integral component of membrane	GO:0005744:cellular_component:mitochondrial inner membrane presequence translocase complex	GO:0001405:cellular_component:presequence translocase-associated import motor	GO:0001671:molecular_function:ATPase activator activity	GO:0022008:biological_process:neurogenesis	GO:0032781:biological_process:positive regulation of ATPase activity	GO:0030150:biological_process:protein import into mitochondrial matrix
Locus_25419.0|BlastHit|gi|81901321|sp|Q8QZZ7.1|TPRKB_MOUSE	7723	GO:0005829:cellular_component:cytosol	GO:0005634:cellular_component:nucleus	GO:0019901:molecular_function:protein kinase binding	GO:0008033:biological_process:tRNA processing
Locus_25433.1|BlastHit|gi|19863257|sp|Q13616.2|CUL1_HUMAN	7748	GO:0019005:cellular_component:SCF ubiquitin ligase complex	GO:0006915:biological_process:apoptotic process	GO:0008283:biological_process:cell proliferation	GO:0009887:biological_process:organ morphogenesis	GO:0006513:biological_process:protein monoubiquitination	GO:0031146:biological_process:SCF-dependent proteasomal ubiquitin-dependent protein catabolic process	GO:0006511:biological_process:ubiquitin-dependent protein catabolic process	GO:0016032:biological_process:viral process
Locus_25439.0|BlastHit|gi|74811717|sp|Q7Z0Q2.1|RNKB_CERCA	7755	GO:0016021:cellular_component:integral component of membrane	GO:0004521:molecular_function:endoribonuclease activity	GO:0090502:biological_process:RNA phosphodiester bond hydrolysis, endonucleolytic	GO:0009303:biological_process:rRNA transcription
Locus_25453.1|BlastHit|gi|75069845|sp|Q58D31.3|DHSO_BOVIN	7763	GO:0070062:cellular_component:extracellular vesicular exosome	GO:0031966:cellular_component:mitochondrial membrane	GO:0031514:cellular_component:motile cilium	GO:0003939:molecular_function:L-iditol 2-dehydrogenase activity	GO:0051287:molecular_function:NAD binding	GO:0008270:molecular_function:zinc ion binding	GO:0046370:biological_process:fructose biosynthetic process	GO:0051160:biological_process:L-xylitol catabolic process	GO:0006062:biological_process:sorbitol catabolic process	GO:0030317:biological_process:sperm motility
Locus_25453.1|BlastHit|gi|75069845|sp|Q58D31.3|DHSO_BOVIN	7764	GO:0070062:cellular_component:extracellular vesicular exosome	GO:0031966:cellular_component:mitochondrial membrane	GO:0031514:cellular_component:motile cilium	GO:0003939:molecular_function:L-iditol 2-dehydrogenase activity	GO:0051287:molecular_function:NAD binding	GO:0008270:molecular_function:zinc ion binding	GO:0046370:biological_process:fructose biosynthetic process	GO:0051160:biological_process:L-xylitol catabolic process	GO:0006062:biological_process:sorbitol catabolic process	GO:0030317:biological_process:sperm motility
Locus_25462.0|BlastHit|gi|212288177|sp|Q7LKY2.1|ADDH_SCHPO	7771	GO:0005856:cellular_component:cytoskeleton
Locus_25462.0|BlastHit|gi|212288177|sp|Q7LKY2.1|ADDH_SCHPO	7772	GO:0005856:cellular_component:cytoskeleton
Locus_25472.0|BlastHit|gi|78099267|sp|Q9Z2G9.2|HTAI2_MOUSE	7779	GO:0005737:cellular_component:cytoplasm	GO:0016020:cellular_component:membrane	GO:0005635:cellular_component:nuclear envelope	GO:0016491:molecular_function:oxidoreductase activity	GO:0001525:biological_process:angiogenesis	GO:0006915:biological_process:apoptotic process	GO:0030154:biological_process:cell differentiation	GO:0051170:biological_process:nuclear import	GO:0045765:biological_process:regulation of angiogenesis
Locus_25489.0|BlastHit|gi|182676462|sp|A9UMS3.1|PHB2_XENTR	7784	GO:0070062:cellular_component:extracellular vesicular exosome	GO:0005743:cellular_component:mitochondrial inner membrane	GO:0016363:cellular_component:nuclear matrix	GO:0043234:cellular_component:protein complex	GO:0060749:biological_process:mammary gland alveolus development	GO:0060744:biological_process:mammary gland branching involved in thelarche	GO:0033147:biological_process:negative regulation of intracellular estrogen receptor signaling pathway	GO:0033600:biological_process:negative regulation of mammary gland epithelial cell proliferation	GO:0045892:biological_process:negative regulation of transcription, DNA-templated	GO:0060762:biological_process:regulation of branching involved in mammary gland duct morphogenesis	GO:0006351:biological_process:transcription, DNA-templated
Locus_25494.0|BlastHit|gi|125950361|sp|Q86U28.2|ISCA2_HUMAN	7787	GO:0005739:cellular_component:mitochondrion	GO:0051536:molecular_function:iron-sulfur cluster binding	GO:0046872:molecular_function:metal ion binding	GO:0005198:molecular_function:structural molecule activity	GO:0016226:biological_process:iron-sulfur cluster assembly
Locus_25501.0|BlastHit|gi|122135298|sp|Q29RP9.1|GATA_BOVIN	7805	GO:0030956:cellular_component:glutamyl-tRNA(Gln) amidotransferase complex	GO:0005739:cellular_component:mitochondrion	GO:0005524:molecular_function:ATP binding	GO:0050567:molecular_function:glutaminyl-tRNA synthase (glutamine-hydrolyzing) activity	GO:0070681:biological_process:glutaminyl-tRNAGln biosynthesis via transamidation	GO:0032543:biological_process:mitochondrial translation
Locus_25505.0|BlastHit|gi|81883392|sp|Q5RKH6.1|OS9_RAT	7807	GO:0005783:cellular_component:endoplasmic reticulum	GO:0005788:cellular_component:endoplasmic reticulum lumen	GO:0030246:molecular_function:carbohydrate binding	GO:0001948:molecular_function:glycoprotein binding	GO:0002020:molecular_function:protease binding	GO:0030433:biological_process:ER-associated ubiquitin-dependent protein catabolic process	GO:0006621:biological_process:protein retention in ER lumen	GO:0006605:biological_process:protein targeting	GO:0042787:biological_process:protein ubiquitination involved in ubiquitin-dependent protein catabolic process	GO:0034976:biological_process:response to endoplasmic reticulum stress
Locus_25519.0|BlastHit|gi|338817662|sp|C0KJQ4.2|ALPS_PORTR	7811	GO:0005576:cellular_component:extracellular region	GO:0042742:biological_process:defense response to bacterium
Locus_25531.0|BlastHit|gi|81885679|sp|Q6PEC1.1|TBCA_RAT	7835	GO:0005689:cellular_component:U12-type spliceosomal complex	GO:0006915:biological_process:apoptotic process	GO:2001235:biological_process:positive regulation of apoptotic signaling pathway	GO:0070234:biological_process:positive regulation of T cell apoptotic process	GO:0051384:biological_process:response to glucocorticoid
Locus_25531.0|BlastHit|gi|81885679|sp|Q6PEC1.1|TBCA_RAT	7835	GO:0005737:cellular_component:cytoplasm	GO:0005874:cellular_component:microtubule	GO:0007021:biological_process:tubulin complex assembly
Locus_25552.0|BlastHit|gi|17369766|sp|Q9VCA9.1|SPCS3_DROME	7870	GO:0016021:cellular_component:integral component of membrane	GO:0005787:cellular_component:signal peptidase complex	GO:0008233:molecular_function:peptidase activity	GO:0006465:biological_process:signal peptide processing
Locus_25553.0|BlastHit|gi|124810|sp|P10280.2|IP52_ANESU	7871	GO:0005576:cellular_component:extracellular region	GO:0042151:cellular_component:nematocyst	GO:0004867:molecular_function:serine-type endopeptidase inhibitor activity
Locus_25559.0|BlastHit|gi|122063590|sp|Q7JZM8.1|RM41_DROME	7873	GO:0005762:cellular_component:mitochondrial large ribosomal subunit	GO:0030529:cellular_component:ribonucleoprotein complex	GO:0003735:molecular_function:structural constituent of ribosome	GO:0006412:biological_process:translation
Locus_25562.0|BlastHit|gi|81900078|sp|Q8CEF1.1|FEM1C_MOUSE	7876	GO:0005737:cellular_component:cytoplasm	GO:0016567:biological_process:protein ubiquitination
Locus_25577.1|BlastHit|gi|48428484|sp|Q9BXM7.1|PINK1_HUMAN	7886	GO:0097449:cellular_component:astrocyte projection	GO:0030424:cellular_component:axon	GO:0044297:cellular_component:cell body	GO:0000785:cellular_component:chromatin	GO:0005737:cellular_component:cytoplasm	GO:0005856:cellular_component:cytoskeleton	GO:0005829:cellular_component:cytosol	GO:0031307:cellular_component:integral component of mitochondrial outer membrane	GO:0097413:cellular_component:Lewy body	GO:0016020:cellular_component:membrane	GO:0005743:cellular_component:mitochondrial inner membrane	GO:0005758:cellular_component:mitochondrial intermembrane space	GO:0005741:cellular_component:mitochondrial outer membrane	GO:0005739:cellular_component:mitochondrion	GO:0005634:cellular_component:nucleus	GO:0048471:cellular_component:perinuclear region of cytoplasm	GO:0005524:molecular_function:ATP binding	GO:0055131:molecular_function:C3HC4-type RING finger domain binding	GO:0010857:molecular_function:calcium-dependent protein kinase activity	GO:0016301:molecular_function:kinase activity	GO:0000287:molecular_function:magnesium ion binding	GO:0016504:molecular_function:peptidase activator activity	GO:0002020:molecular_function:protease binding	GO:0043422:molecular_function:protein kinase B binding	GO:0004674:molecular_function:protein serine/threonine kinase activity	GO:0031625:molecular_function:ubiquitin protein ligase binding	GO:0032148:biological_process:activation of protein kinase B activity	GO:0071456:biological_process:cellular response to hypoxia	GO:0097237:biological_process:cellular response to toxic substance	GO:0035556:biological_process:intracellular signal transduction	GO:0000422:biological_process:mitochondrion degradation	GO:0007005:biological_process:mitochondrion organization
Locus_25583.0|BlastHit|gi|1174432|sp|P41689.1|SPYA_FELCA	7888	GO:0005759:cellular_component:mitochondrial matrix	GO:0005739:cellular_component:mitochondrion	GO:0005777:cellular_component:peroxisome	GO:0008453:molecular_function:alanine-glyoxylate transaminase activity	GO:0030170:molecular_function:pyridoxal phosphate binding	GO:0004760:molecular_function:serine-pyruvate transaminase activity
Locus_25595.0|BlastHit|gi|67460968|sp|Q9CYK2.2|QPCT_MOUSE	7892	GO:0005576:cellular_component:extracellular region	GO:0016603:molecular_function:glutaminyl-peptide cyclotransferase activity	GO:0008270:molecular_function:zinc ion binding	GO:0017186:biological_process:peptidyl-pyroglutamic acid biosynthetic process, using glutaminyl-peptide cyclotransferase
Locus_25610.0|BlastHit|gi|134035040|sp|Q9DBY1.3|SYVN1_MOUSE	7917	GO:0005789:cellular_component:endoplasmic reticulum membrane	GO:0016021:cellular_component:integral component of membrane	GO:0016874:molecular_function:ligase activity	GO:0008270:molecular_function:zinc ion binding	GO:0030433:biological_process:ER-associated ubiquitin-dependent protein catabolic process	GO:0018279:biological_process:protein N-linked glycosylation via asparagine	GO:0016567:biological_process:protein ubiquitination
Locus_25616.0|BlastHit|gi|1171772|sp|P46461.1|NSF1_DROME	7927	GO:0005737:cellular_component:cytoplasm	GO:0043195:cellular_component:terminal bouton	GO:0005524:molecular_function:ATP binding	GO:0016887:molecular_function:ATPase activity	GO:0046872:molecular_function:metal ion binding	GO:0032403:molecular_function:protein complex binding	GO:0006200:biological_process:ATP catabolic process	GO:0007030:biological_process:Golgi organization	GO:0007274:biological_process:neuromuscular synaptic transmission	GO:0007269:biological_process:neurotransmitter secretion	GO:0006909:biological_process:phagocytosis	GO:0035540:biological_process:positive regulation of SNARE complex disassembly	GO:0034214:biological_process:protein hexamerization	GO:0051260:biological_process:protein homooligomerization	GO:0015031:biological_process:protein transport	GO:0048172:biological_process:regulation of short-term neuronal synaptic plasticity	GO:0031629:biological_process:synaptic vesicle fusion to presynaptic membrane	GO:0016082:biological_process:synaptic vesicle priming
Locus_25638.0|BlastHit|gi|62900285|sp|Q8BH95.1|ECHM_MOUSE	7942	GO:0070062:cellular_component:extracellular vesicular exosome	GO:0005759:cellular_component:mitochondrial matrix	GO:0005739:cellular_component:mitochondrion	GO:0004300:molecular_function:enoyl-CoA hydratase activity	GO:0006635:biological_process:fatty acid beta-oxidation
Locus_25646.0|BlastHit|gi|74761529|sp|Q9H8H3.1|MET7A_HUMAN	7957	GO:0005783:cellular_component:endoplasmic reticulum	GO:0070062:cellular_component:extracellular vesicular exosome	GO:0005811:cellular_component:lipid particle	GO:0016020:cellular_component:membrane	GO:0008168:molecular_function:methyltransferase activity
Locus_25652.0|BlastHit|gi|311033385|sp|P23434.2|GCSH_HUMAN	7960	GO:0005960:cellular_component:glycine cleavage complex	GO:0005739:cellular_component:mitochondrion	GO:0004047:molecular_function:aminomethyltransferase activity	GO:0006546:biological_process:glycine catabolic process	GO:0019464:biological_process:glycine decarboxylation via glycine cleavage system
Locus_25660.0|BlastHit|gi|82082907|sp|Q5ZMB2.1|HEBP1_CHICK	7968	GO:0005737:cellular_component:cytoplasm	GO:0020037:molecular_function:heme binding
Locus_25664.0|BlastHit|gi|313118235|sp|B2D0J5.1|EST6_APIME	7972	GO:0005576:cellular_component:extracellular region	GO:0052689:molecular_function:carboxylic ester hydrolase activity
Locus_25670.0|BlastHit|gi|17380252|sp|P70195.1|PSB7_MOUSE	7976	GO:0005829:cellular_component:cytosol	GO:0070062:cellular_component:extracellular vesicular exosome	GO:0015630:cellular_component:microtubule cytoskeleton	GO:0005634:cellular_component:nucleus	GO:0005839:cellular_component:proteasome core complex	GO:0004298:molecular_function:threonine-type endopeptidase activity	GO:0051603:biological_process:proteolysis involved in cellular protein catabolic process
Locus_25673.0|BlastHit|gi|20137699|sp|O70152.1|DPM1_MOUSE	7978	GO:0005789:cellular_component:endoplasmic reticulum membrane	GO:0004582:molecular_function:dolichyl-phosphate beta-D-mannosyltransferase activity	GO:0004169:molecular_function:dolichyl-phosphate-mannose-protein mannosyltransferase activity	GO:0006506:biological_process:GPI anchor biosynthetic process	GO:0035268:biological_process:protein mannosylation	GO:0035269:biological_process:protein O-linked mannosylation
Locus_25679.0|BlastHit|gi|31340372|sp|Q9VJ38.2|RM13_DROME	7982	GO:0005762:cellular_component:mitochondrial large ribosomal subunit	GO:0003735:molecular_function:structural constituent of ribosome	GO:0006412:biological_process:translation
Locus_25700.0|BlastHit|gi|74871763|sp|Q9VYY9.3|Y1727_DROME	8009	GO:0005737:cellular_component:cytoplasm	GO:0005768:cellular_component:endosome	GO:0031982:cellular_component:vesicle	GO:0005097:molecular_function:Rab GTPase activator activity	GO:0017137:molecular_function:Rab GTPase binding	GO:0007298:biological_process:border follicle cell migration	GO:0032851:biological_process:positive regulation of Rab GTPase activity	GO:0030334:biological_process:regulation of cell migration	GO:0032880:biological_process:regulation of protein localization	GO:0032313:biological_process:regulation of Rab GTPase activity
Locus_25712.0|BlastHit|gi|59803097|sp|Q00537.2|CDK17_HUMAN	8031	GO:0005524:molecular_function:ATP binding	GO:0004693:molecular_function:cyclin-dependent protein serine/threonine kinase activity	GO:0004672:molecular_function:protein kinase activity	GO:0006468:biological_process:protein phosphorylation
Locus_25724.0|BlastHit|gi|21264423|sp|P21266.3|GSTM3_HUMAN	8042	GO:0005737:cellular_component:cytoplasm	GO:0005829:cellular_component:cytosol	GO:0070062:cellular_component:extracellular vesicular exosome	GO:0005634:cellular_component:nucleus	GO:0035686:cellular_component:sperm fibrous sheath	GO:0019899:molecular_function:enzyme binding	GO:0043295:molecular_function:glutathione binding	GO:0004364:molecular_function:glutathione transferase activity	GO:0042802:molecular_function:identical protein binding	GO:0042803:molecular_function:protein homodimerization activity	GO:0070458:biological_process:cellular detoxification of nitrogen compound	GO:0008065:biological_process:establishment of blood-nerve barrier	GO:1901687:biological_process:glutathione derivative biosynthetic process	GO:0006749:biological_process:glutathione metabolic process	GO:0018916:biological_process:nitrobenzene metabolic process	GO:0043627:biological_process:response to estrogen	GO:0044281:biological_process:small molecule metabolic process	GO:0042178:biological_process:xenobiotic catabolic process	GO:0006805:biological_process:xenobiotic metabolic process
Locus_25731.0|BlastHit|gi|74731102|sp|Q96AA3.1|RFT1_HUMAN	8044	GO:0016021:cellular_component:integral component of membrane	GO:0005319:molecular_function:lipid transporter activity	GO:0008643:biological_process:carbohydrate transport
Locus_25731.0|BlastHit|gi|74731102|sp|Q96AA3.1|RFT1_HUMAN	8044	GO:0016021:cellular_component:integral component of membrane	GO:0005319:molecular_function:lipid transporter activity	GO:0008643:biological_process:carbohydrate transport	GO:0044267:biological_process:cellular protein metabolic process	GO:0006488:biological_process:dolichol-linked oligosaccharide biosynthetic process	GO:0043687:biological_process:post-translational protein modification	GO:0018279:biological_process:protein N-linked glycosylation via asparagine
Locus_25742.0|BlastHit|gi|257051070|sp|P53992.3|SC24C_HUMAN	8050	GO:0030127:cellular_component:COPII vesicle coat	GO:0005829:cellular_component:cytosol	GO:0005789:cellular_component:endoplasmic reticulum membrane	GO:0012507:cellular_component:ER to Golgi transport vesicle membrane	GO:0000139:cellular_component:Golgi membrane	GO:0048471:cellular_component:perinuclear region of cytoplasm	GO:0008270:molecular_function:zinc ion binding	GO:0019886:biological_process:antigen processing and presentation of exogenous peptide antigen via MHC class II	GO:0002474:biological_process:antigen processing and presentation of peptide antigen via MHC class I	GO:0044267:biological_process:cellular protein metabolic process	GO:0048208:biological_process:COPII vesicle coating	GO:0006888:biological_process:ER to Golgi vesicle-mediated transport	GO:0006886:biological_process:intracellular protein transport	GO:0061024:biological_process:membrane organization	GO:0043687:biological_process:post-translational protein modification	GO:0018279:biological_process:protein N-linked glycosylation via asparagine	GO:0044281:biological_process:small molecule metabolic process
Locus_25785.0|BlastHit|gi|74866395|sp|Q94521.1|DNAT_DROME	8080	GO:0005737:cellular_component:cytoplasm	GO:0004059:molecular_function:aralkylamine N-acetyltransferase activity	GO:0004060:molecular_function:arylamine N-acetyltransferase activity	GO:0008080:molecular_function:N-acetyltransferase activity	GO:0006584:biological_process:catecholamine metabolic process	GO:0048066:biological_process:developmental pigmentation	GO:0042420:biological_process:dopamine catabolic process	GO:0030187:biological_process:melatonin biosynthetic process	GO:0046334:biological_process:octopamine catabolic process	GO:0045187:biological_process:regulation of circadian sleep/wake cycle, sleep	GO:0042429:biological_process:serotonin catabolic process	GO:0030431:biological_process:sleep
Locus_25787.0|BlastHit|gi|46576895|sp|Q62009.2|POSTN_MOUSE	8081	GO:0005578:cellular_component:proteinaceous extracellular matrix	GO:0005802:cellular_component:trans-Golgi network	GO:0008201:molecular_function:heparin binding	GO:0007155:biological_process:cell adhesion	GO:0030198:biological_process:extracellular matrix organization	GO:0008593:biological_process:regulation of Notch signaling pathway	GO:0009888:biological_process:tissue development
Locus_25791.0|BlastHit|gi|12643815|sp|Q9NQP4.1|PFD4_HUMAN	8082	GO:0005737:cellular_component:cytoplasm	GO:0005829:cellular_component:cytosol	GO:0005739:cellular_component:mitochondrion	GO:0005634:cellular_component:nucleus	GO:0016272:cellular_component:prefoldin complex	GO:0051087:molecular_function:chaperone binding	GO:0051084:biological_process:'de novo' posttranslational protein folding	GO:0044267:biological_process:cellular protein metabolic process	GO:0006457:biological_process:protein folding
Locus_25809.0|BlastHit|gi|62296810|sp|Q63081.2|PDIA6_RAT	8096	GO:0005788:cellular_component:endoplasmic reticulum lumen	GO:0005793:cellular_component:endoplasmic reticulum-Golgi intermediate compartment	GO:0070062:cellular_component:extracellular vesicular exosome	GO:0042470:cellular_component:melanosome	GO:0005886:cellular_component:plasma membrane	GO:0005790:cellular_component:smooth endoplasmic reticulum	GO:0005509:molecular_function:calcium ion binding	GO:0003756:molecular_function:protein disulfide isomerase activity	GO:0043277:biological_process:apoptotic cell clearance	GO:0045454:biological_process:cell redox homeostasis	GO:0030168:biological_process:platelet activation	GO:0070527:biological_process:platelet aggregation	GO:0006457:biological_process:protein folding	GO:0034976:biological_process:response to endoplasmic reticulum stress
Locus_25813.0|BlastHit|gi|9297057|sp|Q9VND8.1|RHEB_DROME	8099	GO:0005886:cellular_component:plasma membrane	GO:0005525:molecular_function:GTP binding	GO:0003924:molecular_function:GTPase activity	GO:0007411:biological_process:axon guidance	GO:0005975:biological_process:carbohydrate metabolic process	GO:0016049:biological_process:cell growth	GO:0000082:biological_process:G1/S transition of mitotic cell cycle	GO:0006629:biological_process:lipid metabolic process	GO:0035264:biological_process:multicellular organism growth	GO:0010507:biological_process:negative regulation of autophagy	GO:0042331:biological_process:phototaxis	GO:0030307:biological_process:positive regulation of cell growth	GO:0045793:biological_process:positive regulation of cell size	GO:0090070:biological_process:positive regulation of ribosome biogenesis	GO:0032008:biological_process:positive regulation of TOR signaling	GO:0045727:biological_process:positive regulation of translation	GO:0010506:biological_process:regulation of autophagy	GO:2000377:biological_process:regulation of reactive oxygen species metabolic process	GO:0042594:biological_process:response to starvation	GO:0042254:biological_process:ribosome biogenesis	GO:0007264:biological_process:small GTPase mediated signal transduction	GO:0051124:biological_process:synaptic growth at neuromuscular junction
Locus_25826.0|BlastHit|gi|160385708|sp|Q9BUQ8.3|DDX23_HUMAN	8104	GO:0071013:cellular_component:catalytic step 2 spliceosome	GO:0070062:cellular_component:extracellular vesicular exosome	GO:0005739:cellular_component:mitochondrion	GO:0005654:cellular_component:nucleoplasm	GO:0005634:cellular_component:nucleus	GO:0005886:cellular_component:plasma membrane	GO:0005682:cellular_component:U5 snRNP	GO:0005524:molecular_function:ATP binding	GO:0004004:molecular_function:ATP-dependent RNA helicase activity	GO:0044822:molecular_function:poly(A) RNA binding	GO:0006200:biological_process:ATP catabolic process	GO:0000354:biological_process:cis assembly of pre-catalytic spliceosome	GO:0010467:biological_process:gene expression	GO:0000398:biological_process:mRNA splicing, via spliceosome	GO:0008380:biological_process:RNA splicing	GO:0000375:biological_process:RNA splicing, via transesterification reactions
Locus_25831.0|BlastHit|gi|18203496|sp|Q9UBS3.1|DNJB9_HUMAN	8107	GO:0005737:cellular_component:cytoplasm	GO:0005783:cellular_component:endoplasmic reticulum	GO:0005788:cellular_component:endoplasmic reticulum lumen	GO:0070062:cellular_component:extracellular vesicular exosome	GO:0005730:cellular_component:nucleolus	GO:0030433:biological_process:ER-associated ubiquitin-dependent protein catabolic process
Locus_25840.1|BlastHit|gi|1168731|sp|P45594.1|CADF_DROME	8114	GO:0015629:cellular_component:actin cytoskeleton	GO:0005737:cellular_component:cytoplasm	GO:0005875:cellular_component:microtubule associated complex	GO:0016363:cellular_component:nuclear matrix	GO:0003779:molecular_function:actin binding	GO:0030042:biological_process:actin filament depolymerization	GO:0007015:biological_process:actin filament organization	GO:0030041:biological_process:actin filament polymerization	GO:0000915:biological_process:actomyosin contractile ring assembly	GO:0007409:biological_process:axonogenesis	GO:0007298:biological_process:border follicle cell migration	GO:0000902:biological_process:cell morphogenesis	GO:0048749:biological_process:compound eye development	GO:0001745:biological_process:compound eye morphogenesis	GO:0001737:biological_process:establishment of imaginal disc-derived wing hair orientation	GO:0042067:biological_process:establishment of ommatidial planar polarity	GO:0001736:biological_process:establishment of planar polarity	GO:0008585:biological_process:female gonad development	GO:0036011:biological_process:imaginal disc-derived leg segmentation	GO:0000281:biological_process:mitotic cytokinesis	GO:0016319:biological_process:mushroom body development	GO:0010591:biological_process:regulation of lamellipodium assembly	GO:0042052:biological_process:rhabdomere development
Locus_25843.0|BlastHit|gi|81861262|sp|O54836.1|ZMAT3_MOUSE	8116	GO:0005730:cellular_component:nucleolus	GO:0003723:molecular_function:RNA binding	GO:0008270:molecular_function:zinc ion binding	GO:0006915:biological_process:apoptotic process	GO:0006974:biological_process:cellular response to DNA damage stimulus	GO:0030308:biological_process:negative regulation of cell growth	GO:0015031:biological_process:protein transport
Locus_25856.0|BlastHit|gi|82185925|sp|Q6NYG8.1|DPYD_DANRE	8124	GO:0005737:cellular_component:cytoplasm	GO:0051539:molecular_function:4 iron, 4 sulfur cluster binding	GO:0004152:molecular_function:dihydroorotate dehydrogenase activity	GO:0017113:molecular_function:dihydropyrimidine dehydrogenase (NADP+) activity	GO:0046872:molecular_function:metal ion binding	GO:0000166:molecular_function:nucleotide binding	GO:0019483:biological_process:beta-alanine biosynthetic process	GO:0006214:biological_process:thymidine catabolic process	GO:0006222:biological_process:UMP biosynthetic process	GO:0006212:biological_process:uracil catabolic process
Locus_25863.0|BlastHit|gi|6225843|sp|O60760.3|HPGDS_HUMAN	8152	GO:0005737:cellular_component:cytoplasm	GO:0005829:cellular_component:cytosol	GO:0005509:molecular_function:calcium ion binding	GO:0004364:molecular_function:glutathione transferase activity	GO:0000287:molecular_function:magnesium ion binding	GO:0004667:molecular_function:prostaglandin-D synthase activity	GO:0042803:molecular_function:protein homodimerization activity	GO:0019369:biological_process:arachidonic acid metabolic process	GO:0019371:biological_process:cyclooxygenase pathway	GO:1901687:biological_process:glutathione derivative biosynthetic process	GO:0007626:biological_process:locomotory behavior	GO:0006693:biological_process:prostaglandin metabolic process	GO:0007165:biological_process:signal transduction	GO:0044281:biological_process:small molecule metabolic process	GO:0006805:biological_process:xenobiotic metabolic process
Locus_25872.0|BlastHit|gi|17369753|sp|Q9V411.1|NOG1_DROME	8154	GO:0005730:cellular_component:nucleolus	GO:0005525:molecular_function:GTP binding	GO:0042254:biological_process:ribosome biogenesis	GO:0090307:biological_process:mitotic spindle assembly
Locus_25873.0|BlastHit|gi|284433464|sp|B0BNA9.1|CB029_RAT	8155	GO:0030014:cellular_component:CCR4-NOT complex	GO:0005737:cellular_component:cytoplasm	GO:0005634:cellular_component:nucleus	GO:0031047:biological_process:gene silencing by RNA	GO:0006355:biological_process:regulation of transcription, DNA-templated	GO:0006417:biological_process:regulation of translation	GO:0006351:biological_process:transcription, DNA-templated
Locus_25875.0|BlastHit|gi|37999815|sp|Q9V7Y2.1|SGPL_DROME	8156	GO:0005789:cellular_component:endoplasmic reticulum membrane	GO:0016021:cellular_component:integral component of membrane	GO:0016831:molecular_function:carboxy-lyase activity	GO:0030170:molecular_function:pyridoxal phosphate binding	GO:0008117:molecular_function:sphinganine-1-phosphate aldolase activity	GO:0019752:biological_process:carboxylic acid metabolic process	GO:0046331:biological_process:lateral inhibition	GO:0007275:biological_process:multicellular organismal development	GO:0030149:biological_process:sphingolipid catabolic process
Locus_25883.0|BlastHit|gi|31077161|sp|P52624.2|UPP1_MOUSE	8165	GO:0005737:cellular_component:cytoplasm	GO:0004850:molecular_function:uridine phosphorylase activity	GO:0042149:biological_process:cellular response to glucose starvation	GO:0009166:biological_process:nucleotide catabolic process	GO:0006220:biological_process:pyrimidine nucleotide metabolic process	GO:0044206:biological_process:UMP salvage	GO:0046108:biological_process:uridine metabolic process
Locus_25894.2|BlastHit|gi|20455506|sp|Q60715.2|P4HA1_MOUSE	8172	GO:0005788:cellular_component:endoplasmic reticulum lumen	GO:0016020:cellular_component:membrane	GO:0005739:cellular_component:mitochondrion	GO:0016222:cellular_component:procollagen-proline 4-dioxygenase complex	GO:0005506:molecular_function:iron ion binding	GO:0031418:molecular_function:L-ascorbic acid binding	GO:0016702:molecular_function:oxidoreductase activity, acting on single donors with incorporation of molecular oxygen, incorporation of two atoms of oxygen	GO:0004656:molecular_function:procollagen-proline 4-dioxygenase activity	GO:0030199:biological_process:collagen fibril organization	GO:0018401:biological_process:peptidyl-proline hydroxylation to 4-hydroxy-L-proline
Locus_25895.0|BlastHit|gi|25090702|sp|O46040.3|MSTAA_DROME	8173	GO:0042826:molecular_function:histone deacetylase binding	GO:0008168:molecular_function:methyltransferase activity	GO:0010629:biological_process:negative regulation of gene expression
Locus_25916.0|BlastHit|gi|322967577|sp|Q32N92.2|PATL1_XENLA	8180	GO:0005737:cellular_component:cytoplasm	GO:0000932:cellular_component:cytoplasmic mRNA processing body	GO:0016607:cellular_component:nuclear speck	GO:0016605:cellular_component:PML body	GO:0002151:molecular_function:G-quadruplex RNA binding	GO:0034046:molecular_function:poly(G) binding	GO:0008266:molecular_function:poly(U) RNA binding	GO:0003723:molecular_function:RNA binding	GO:0030371:molecular_function:translation repressor activity	GO:0033962:biological_process:cytoplasmic mRNA processing body assembly	GO:0000290:biological_process:deadenylation-dependent decapping of nuclear-transcribed mRNA	GO:0010607:biological_process:negative regulation of cytoplasmic mRNA processing body assembly	GO:0017148:biological_process:negative regulation of translation
Locus_25931.0|BlastHit|gi|81882484|sp|Q5BJN5.1|MIA40_RAT	8192	GO:0005758:cellular_component:mitochondrial intermembrane space	GO:0015035:molecular_function:protein disulfide oxidoreductase activity	GO:0051084:biological_process:'de novo' posttranslational protein folding	GO:0045041:biological_process:protein import into mitochondrial intermembrane space	GO:0022417:biological_process:protein maturation by protein folding
Locus_25932.0|BlastHit|gi|110808226|sp|Q29S14.1|F18B1_BOVIN	8193	GO:0016021:cellular_component:integral component of membrane
Locus_25934.0|BlastHit|gi|25090702|sp|O46040.3|MSTAA_DROME	8196	GO:0042826:molecular_function:histone deacetylase binding	GO:0008168:molecular_function:methyltransferase activity	GO:0010629:biological_process:negative regulation of gene expression
Locus_25946.0|BlastHit|gi|12231038|sp|Q99471.2|PFD5_HUMAN	8209	GO:0005737:cellular_component:cytoplasm	GO:0005634:cellular_component:nucleus	GO:0016272:cellular_component:prefoldin complex	GO:0003714:molecular_function:transcription corepressor activity	GO:0051084:biological_process:'de novo' posttranslational protein folding	GO:0044267:biological_process:cellular protein metabolic process	GO:0090090:biological_process:negative regulation of canonical Wnt signaling pathway	GO:0045892:biological_process:negative regulation of transcription, DNA-templated	GO:0006457:biological_process:protein folding	GO:0006355:biological_process:regulation of transcription, DNA-templated	GO:0060041:biological_process:retina development in camera-type eye
Locus_25947.0|BlastHit|gi|123893574|sp|Q29R99.1|LIPT2_DANRE	8210	GO:0005759:cellular_component:mitochondrial matrix	GO:0005739:cellular_component:mitochondrion	GO:0034553:biological_process:mitochondrial respiratory chain complex II assembly
Locus_25947.0|BlastHit|gi|123893574|sp|Q29R99.1|LIPT2_DANRE	8210	GO:0005739:cellular_component:mitochondrion	GO:0016874:molecular_function:ligase activity	GO:0033819:molecular_function:lipoyl(octanoyl) transferase activity	GO:0016415:molecular_function:octanoyltransferase activity	GO:0006464:biological_process:cellular protein modification process	GO:0009107:biological_process:lipoate biosynthetic process
Locus_25948.0|BlastHit|gi|2497498|sp|Q16774.2|KGUA_HUMAN	8211	GO:0005829:cellular_component:cytosol	GO:0005524:molecular_function:ATP binding	GO:0004385:molecular_function:guanylate kinase activity	GO:0046034:biological_process:ATP metabolic process	GO:0046060:biological_process:dATP metabolic process	GO:0006185:biological_process:dGDP biosynthetic process	GO:0046054:biological_process:dGMP metabolic process	GO:0017144:biological_process:drug metabolic process	GO:0046711:biological_process:GDP biosynthetic process	GO:0019673:biological_process:GDP-mannose metabolic process	GO:0034436:biological_process:glycoprotein transport	GO:0046037:biological_process:GMP metabolic process	GO:0015949:biological_process:nucleobase-containing small molecule interconversion	GO:0055086:biological_process:nucleobase-containing small molecule metabolic process	GO:0006163:biological_process:purine nucleotide metabolic process	GO:0044281:biological_process:small molecule metabolic process
Locus_25955.1|BlastHit|gi|82186176|sp|Q6P1S4.1|SYRC_XENTR	8218	GO:0005737:cellular_component:cytoplasm	GO:0004814:molecular_function:arginine-tRNA ligase activity	GO:0005524:molecular_function:ATP binding	GO:0006420:biological_process:arginyl-tRNA aminoacylation
Locus_25969.0|BlastHit|gi|74872722|sp|Q9W4M9.1|NSUN2_DROME	8240	GO:0005737:cellular_component:cytoplasm	GO:0005730:cellular_component:nucleolus	GO:0016428:molecular_function:tRNA (cytosine-5-)-methyltransferase activity	GO:0000049:molecular_function:tRNA binding	GO:0007614:biological_process:short-term memory	GO:0030488:biological_process:tRNA methylation
Locus_25971.0|BlastHit|gi|75076029|sp|Q4R5G7.1|DHB12_MACFA	8241	GO:0005789:cellular_component:endoplasmic reticulum membrane	GO:0016021:cellular_component:integral component of membrane	GO:0004303:molecular_function:estradiol 17-beta-dehydrogenase activity	GO:0006703:biological_process:estrogen biosynthetic process	GO:0006633:biological_process:fatty acid biosynthetic process
Locus_25998.0|BlastHit|gi|13431851|sp|P82347.1|SGCD_MOUSE	8276	GO:0005737:cellular_component:cytoplasm	GO:0005856:cellular_component:cytoskeleton	GO:0016011:cellular_component:dystroglycan complex	GO:0005887:cellular_component:integral component of plasma membrane	GO:0016012:cellular_component:sarcoglycan complex	GO:0042383:cellular_component:sarcolemma	GO:0061024:biological_process:membrane organization
Locus_26012.0|BlastHit|gi|110825710|sp|Q02337.2|BDH_BOVIN	8286	GO:0005743:cellular_component:mitochondrial inner membrane	GO:0005759:cellular_component:mitochondrial matrix	GO:0005634:cellular_component:nucleus	GO:0003858:molecular_function:3-hydroxybutyrate dehydrogenase activity
Locus_26014.0|BlastHit|gi|75055295|sp|Q5RFR0.1|TTPAL_PONAB	8290	GO:0005622:cellular_component:intracellular	GO:0016020:cellular_component:membrane	GO:0005215:molecular_function:transporter activity
Locus_26016.0|BlastHit|gi|17367081|sp|Q9SF85.1|ADK1_ARATH	8293	GO:0048046:cellular_component:apoplast	GO:0009507:cellular_component:chloroplast	GO:0005829:cellular_component:cytosol	GO:0016020:cellular_component:membrane	GO:0005886:cellular_component:plasma membrane	GO:0009506:cellular_component:plasmodesma	GO:0004001:molecular_function:adenosine kinase activity	GO:0005524:molecular_function:ATP binding	GO:0005507:molecular_function:copper ion binding	GO:0016773:molecular_function:phosphotransferase activity, alcohol group as acceptor	GO:0006169:biological_process:adenosine salvage	GO:0044209:biological_process:AMP salvage	GO:0046686:biological_process:response to cadmium ion	GO:0080094:biological_process:response to trehalose-6-phosphate	GO:0016032:biological_process:viral process
Locus_26018.0|BlastHit|gi|10720082|sp|Q9Y4Z0.1|LSM4_HUMAN	8294	GO:0005829:cellular_component:cytosol	GO:0030532:cellular_component:small nuclear ribonucleoprotein complex	GO:0005681:cellular_component:spliceosomal complex	GO:0005688:cellular_component:U6 snRNP	GO:0044822:molecular_function:poly(A) RNA binding	GO:0043928:biological_process:exonucleolytic nuclear-transcribed mRNA catabolic process involved in deadenylation-dependent decay	GO:0010467:biological_process:gene expression	GO:0016071:biological_process:mRNA metabolic process	GO:0006397:biological_process:mRNA processing	GO:0000288:biological_process:nuclear-transcribed mRNA catabolic process, deadenylation-dependent decay	GO:0016070:biological_process:RNA metabolic process	GO:0008380:biological_process:RNA splicing
Locus_26020.0|BlastHit|gi|257096251|sp|B0W3L6.1|CARM1_CULQU	8296	GO:0005737:cellular_component:cytoplasm	GO:0005634:cellular_component:nucleus	GO:0042054:molecular_function:histone methyltransferase activity	GO:0008469:molecular_function:histone-arginine N-methyltransferase activity	GO:0035242:molecular_function:protein-arginine omega-N asymmetric methyltransferase activity	GO:0035241:molecular_function:protein-arginine omega-N monomethyltransferase activity	GO:0006338:biological_process:chromatin remodeling	GO:0034969:biological_process:histone arginine methylation	GO:0019919:biological_process:peptidyl-arginine methylation, to asymmetrical-dimethyl arginine	GO:0006355:biological_process:regulation of transcription, DNA-templated	GO:0006351:biological_process:transcription, DNA-templated
Locus_26020.0|BlastHit|gi|257096251|sp|B0W3L6.1|CARM1_CULQU	8297	GO:0005737:cellular_component:cytoplasm	GO:0005634:cellular_component:nucleus	GO:0042054:molecular_function:histone methyltransferase activity	GO:0008469:molecular_function:histone-arginine N-methyltransferase activity	GO:0035242:molecular_function:protein-arginine omega-N asymmetric methyltransferase activity	GO:0035241:molecular_function:protein-arginine omega-N monomethyltransferase activity	GO:0006338:biological_process:chromatin remodeling	GO:0034969:biological_process:histone arginine methylation	GO:0019919:biological_process:peptidyl-arginine methylation, to asymmetrical-dimethyl arginine	GO:0006355:biological_process:regulation of transcription, DNA-templated	GO:0006351:biological_process:transcription, DNA-templated
Locus_26024.0|BlastHit|gi|215274159|sp|Q9NZU1.3|FLRT1_HUMAN	8305	GO:0005576:cellular_component:extracellular region
Locus_26040.0|BlastHit|gi|18202839|sp|Q9CXN7.1|PBLD2_MOUSE	8329	GO:0005737:cellular_component:cytoplasm	GO:0070062:cellular_component:extracellular vesicular exosome	GO:0016853:molecular_function:isomerase activity	GO:0009058:biological_process:biosynthetic process	GO:0030277:biological_process:maintenance of gastrointestinal epithelium	GO:0010633:biological_process:negative regulation of epithelial cell migration	GO:0050680:biological_process:negative regulation of epithelial cell proliferation	GO:0010719:biological_process:negative regulation of epithelial to mesenchymal transition	GO:0060394:biological_process:negative regulation of pathway-restricted SMAD protein phosphorylation	GO:0060392:biological_process:negative regulation of SMAD protein import into nucleus	GO:0030512:biological_process:negative regulation of transforming growth factor beta receptor signaling pathway
Locus_26041.0|BlastHit|gi|20454906|sp|Q9UNN5.2|FAF1_HUMAN	8330	GO:0034098:cellular_component:Cdc48p-Npl4p-Ufd1p AAA ATPase complex	GO:0005737:cellular_component:cytoplasm	GO:0005829:cellular_component:cytosol	GO:0005635:cellular_component:nuclear envelope	GO:0005634:cellular_component:nucleus	GO:0048471:cellular_component:perinuclear region of cytoplasm	GO:0031072:molecular_function:heat shock protein binding	GO:0019904:molecular_function:protein domain specific binding	GO:0019901:molecular_function:protein kinase binding	GO:0006915:biological_process:apoptotic process	GO:0008219:biological_process:cell death	GO:0007253:biological_process:cytoplasmic sequestering of NF-kappaB	GO:1902043:biological_process:positive regulation of extrinsic apoptotic signaling pathway via death domain receptors	GO:0031334:biological_process:positive regulation of protein complex assembly	GO:0030155:biological_process:regulation of cell adhesion	GO:0042176:biological_process:regulation of protein catabolic process
Locus_26042.1|BlastHit|gi|60390935|sp|Q7Z5L0.1|VMO1_HUMAN	8331	GO:0070062:cellular_component:extracellular vesicular exosome
Locus_26042.1|BlastHit|gi|60390935|sp|Q7Z5L0.1|VMO1_HUMAN	8333	GO:0070062:cellular_component:extracellular vesicular exosome
Locus_26046.0|BlastHit|gi|25090065|sp|Q9VNV3.1|DDX1_DROME	8336	GO:0005634:cellular_component:nucleus	GO:0005524:molecular_function:ATP binding	GO:0008026:molecular_function:ATP-dependent helicase activity	GO:0003682:molecular_function:chromatin binding	GO:0033677:molecular_function:DNA/RNA helicase activity	GO:0004527:molecular_function:exonuclease activity	GO:0004386:molecular_function:helicase activity	GO:0004518:molecular_function:nuclease activity	GO:0008143:molecular_function:poly(A) binding	GO:0003712:molecular_function:transcription cofactor activity	GO:0006200:biological_process:ATP catabolic process	GO:0032508:biological_process:DNA duplex unwinding	GO:0006302:biological_process:double-strand break repair	GO:0001700:biological_process:embryonic development via the syncytial blastoderm	GO:0090305:biological_process:nucleic acid phosphodiester bond hydrolysis	GO:1903506:biological_process:regulation of nucleic acid-templated transcription	GO:0042254:biological_process:ribosome biogenesis
Locus_26049.0|BlastHit|gi|226723263|sp|A2A8L5.1|PTPRF_MOUSE	8339	GO:0030424:cellular_component:axon	GO:0005925:cellular_component:focal adhesion	GO:0016021:cellular_component:integral component of membrane	GO:0005875:cellular_component:microtubule associated complex	GO:0005886:cellular_component:plasma membrane	GO:0008201:molecular_function:heparin binding	GO:0004725:molecular_function:protein tyrosine phosphatase activity	GO:0032093:molecular_function:SAM domain binding	GO:0005001:molecular_function:transmembrane receptor protein tyrosine phosphatase activity	GO:0048675:biological_process:axon extension	GO:0007411:biological_process:axon guidance	GO:0007412:biological_process:axon target recognition	GO:0007155:biological_process:cell adhesion	GO:0001700:biological_process:embryonic development via the syncytial blastoderm	GO:0008045:biological_process:motor neuron axon guidance	GO:0007399:biological_process:nervous system development	GO:0048477:biological_process:oogenesis	GO:0035335:biological_process:peptidyl-tyrosine dephosphorylation	GO:0008594:biological_process:photoreceptor cell morphogenesis	GO:0006470:biological_process:protein dephosphorylation	GO:0045467:biological_process:R7 cell development	GO:0048841:biological_process:regulation of axon extension involved in axon guidance	GO:0008360:biological_process:regulation of cell shape	GO:0031290:biological_process:retinal ganglion cell axon guidance	GO:0051124:biological_process:synaptic growth at neuromuscular junction
Locus_26054.0|BlastHit|gi|136424|sp|P00765.1|TRYP_ASTFL	8342	GO:0005615:cellular_component:extracellular space	GO:0046872:molecular_function:metal ion binding	GO:0004252:molecular_function:serine-type endopeptidase activity	GO:0007586:biological_process:digestion
Locus_26055.0|BlastHit|gi|30315972|sp|O08605.2|MKNK1_MOUSE	8343	GO:0005524:molecular_function:ATP binding	GO:0004674:molecular_function:protein serine/threonine kinase activity	GO:0097192:biological_process:extrinsic apoptotic signaling pathway in absence of ligand	GO:0035556:biological_process:intracellular signal transduction	GO:0018105:biological_process:peptidyl-serine phosphorylation	GO:0006468:biological_process:protein phosphorylation	GO:0006446:biological_process:regulation of translational initiation	GO:0009651:biological_process:response to salt stress
Locus_26055.0|BlastHit|gi|30315972|sp|O08605.2|MKNK1_MOUSE	8343	GO:0005887:cellular_component:integral component of plasma membrane	GO:0005765:cellular_component:lysosomal membrane	GO:0007155:biological_process:cell adhesion
Locus_26060.0|BlastHit|gi|229891202|sp|Q1LXK4.2|M10B1_DANRE	8348	GO:0000932:cellular_component:cytoplasmic mRNA processing body	GO:0005524:molecular_function:ATP binding	GO:0004386:molecular_function:helicase activity	GO:0003723:molecular_function:RNA binding	GO:0035279:biological_process:mRNA cleavage involved in gene silencing by miRNA
Locus_26062.0|BlastHit|gi|1706299|sp|P51398.1|RT29_HUMAN	8350	GO:0005761:cellular_component:mitochondrial ribosome	GO:0005739:cellular_component:mitochondrion	GO:0005730:cellular_component:nucleolus	GO:0015935:cellular_component:small ribosomal subunit	GO:0044822:molecular_function:poly(A) RNA binding	GO:0008637:biological_process:apoptotic mitochondrial changes
Locus_26071.0|BlastHit|gi|135425|sp|P09645.1|TBA8_CHICK	8363	GO:0005737:cellular_component:cytoplasm	GO:0005874:cellular_component:microtubule	GO:0005525:molecular_function:GTP binding	GO:0003924:molecular_function:GTPase activity	GO:0005200:molecular_function:structural constituent of cytoskeleton	GO:0007017:biological_process:microtubule-based process	GO:0051258:biological_process:protein polymerization
Locus_26085.0|BlastHit|gi|3041732|sp|P09671.3|SODM_MOUSE	8367	GO:0070062:cellular_component:extracellular vesicular exosome	GO:0005743:cellular_component:mitochondrial inner membrane	GO:0042645:cellular_component:mitochondrial nucleoid	GO:0005739:cellular_component:mitochondrion	GO:0003677:molecular_function:DNA binding	GO:0030145:molecular_function:manganese ion binding	GO:0019825:molecular_function:oxygen binding	GO:0004784:molecular_function:superoxide dismutase activity	GO:0001306:biological_process:age-dependent response to oxidative stress	GO:0001315:biological_process:age-dependent response to reactive oxygen species	GO:0008637:biological_process:apoptotic mitochondrial changes	GO:0071361:biological_process:cellular response to ethanol	GO:0003032:biological_process:detection of oxygen	GO:0048773:biological_process:erythrophore differentiation	GO:0006749:biological_process:glutathione metabolic process	GO:0007507:biological_process:heart development	GO:0030097:biological_process:hemopoiesis	GO:0050665:biological_process:hydrogen peroxide biosynthetic process	GO:0008630:biological_process:intrinsic apoptotic signaling pathway in response to DNA damage	GO:0008631:biological_process:intrinsic apoptotic signaling pathway in response to oxidative stress	GO:0055072:biological_process:iron ion homeostasis	GO:0001889:biological_process:liver development	GO:0007626:biological_process:locomotory behavior	GO:0007005:biological_process:mitochondrion organization	GO:0045599:biological_process:negative regulation of fat cell differentiation	GO:0048147:biological_process:negative regulation of fibroblast proliferation	GO:0043524:biological_process:negative regulation of neuron apoptotic process	GO:1902176:biological_process:negative regulation of oxidative stress-induced intrinsic apoptotic signaling pathway	GO:0048666:biological_process:neuron development	GO:0032364:biological_process:oxygen homeostasis	GO:0045429:biological_process:positive regulation of nitric oxide biosynthetic process	GO:0009791:biological_process:post-embryonic development
Locus_26099.1|BlastHit|gi|34395772|sp|Q8CEE7.1|RDH13_MOUSE	8378	GO:0005622:cellular_component:intracellular	GO:0004745:molecular_function:retinol dehydrogenase activity	GO:0050896:biological_process:response to stimulus	GO:0042572:biological_process:retinol metabolic process	GO:0007601:biological_process:visual perception
Locus_26106.0|BlastHit|gi|27923748|sp|Q9NGC3.2|CEG1A_DROME	8384	GO:0005622:cellular_component:intracellular	GO:0008060:molecular_function:ARF GTPase activator activity	GO:0005525:molecular_function:GTP binding	GO:0005096:molecular_function:GTPase activator activity	GO:0003924:molecular_function:GTPase activity	GO:0008270:molecular_function:zinc ion binding	GO:0006184:biological_process:GTP catabolic process	GO:0043547:biological_process:positive regulation of GTPase activity	GO:0032312:biological_process:regulation of ARF GTPase activity	GO:0007264:biological_process:small GTPase mediated signal transduction
Locus_26112.0|BlastHit|gi|290463172|sp|B4HZ81.1|CISD2_DROSE	8386	GO:0005789:cellular_component:endoplasmic reticulum membrane	GO:0016021:cellular_component:integral component of membrane	GO:0051537:molecular_function:2 iron, 2 sulfur cluster binding	GO:0046872:molecular_function:metal ion binding
Locus_26113.0|BlastHit|gi|50402181|sp|Q7T2P6.1|TIM23_DANRE	8387	GO:0016021:cellular_component:integral component of membrane	GO:0005744:cellular_component:mitochondrial inner membrane presequence translocase complex	GO:0042719:cellular_component:mitochondrial intermembrane space protein transporter complex	GO:0015450:molecular_function:P-P-bond-hydrolysis-driven protein transmembrane transporter activity	GO:0008565:molecular_function:protein transporter activity	GO:0006886:biological_process:intracellular protein transport	GO:0007275:biological_process:multicellular organismal development	GO:0045039:biological_process:protein import into mitochondrial inner membrane
Locus_26116.0|BlastHit|gi|13124024|sp|Q9PW70.1|CISH_CHICK	8388	GO:0005886:cellular_component:plasma membrane	GO:0035556:biological_process:intracellular signal transduction	GO:0009968:biological_process:negative regulation of signal transduction	GO:0007205:biological_process:protein kinase C-activating G-protein coupled receptor signaling pathway	GO:0016567:biological_process:protein ubiquitination	GO:0040008:biological_process:regulation of growth
Locus_26121.0|BlastHit|gi|17865553|sp|Q99N95.1|RM03_MOUSE	8389	GO:0005762:cellular_component:mitochondrial large ribosomal subunit	GO:0005739:cellular_component:mitochondrion	GO:0044822:molecular_function:poly(A) RNA binding	GO:0003735:molecular_function:structural constituent of ribosome	GO:0006412:biological_process:translation
Locus_26125.2|BlastHit|gi|122140852|sp|Q3ZBY7.1|DEGS1_BOVIN	8392	GO:0005789:cellular_component:endoplasmic reticulum membrane	GO:0016021:cellular_component:integral component of membrane	GO:0005739:cellular_component:mitochondrion	GO:0016705:molecular_function:oxidoreductase activity, acting on paired donors, with incorporation or reduction of molecular oxygen	GO:0006633:biological_process:fatty acid biosynthetic process	GO:0030148:biological_process:sphingolipid biosynthetic process
Locus_26128.0|BlastHit|gi|73921524|sp|Q5T2D3.1|OTUD3_HUMAN	8393	GO:0004843:molecular_function:ubiquitin-specific protease activity	GO:0035871:biological_process:protein K11-linked deubiquitination	GO:0044313:biological_process:protein K6-linked deubiquitination
Locus_26134.0|BlastHit|gi|110825729|sp|P05661.4|MYSA_DROME	8402	GO:0031672:cellular_component:A band	GO:0016459:cellular_component:myosin complex	GO:0032982:cellular_component:myosin filament	GO:0005703:cellular_component:polytene chromosome puff	GO:0030017:cellular_component:sarcomere	GO:0030898:molecular_function:actin-dependent ATPase activity	GO:0005524:molecular_function:ATP binding	GO:0042623:molecular_function:ATPase activity, coupled	GO:0003774:molecular_function:motor activity	GO:0042803:molecular_function:protein homodimerization activity	GO:0008307:molecular_function:structural constituent of muscle	GO:0007527:biological_process:adult somatic muscle development	GO:0006200:biological_process:ATP catabolic process	GO:0007298:biological_process:border follicle cell migration	GO:0007427:biological_process:epithelial cell migration, open tracheal system	GO:0060361:biological_process:flight	GO:0040011:biological_process:locomotion	GO:0042692:biological_process:muscle cell differentiation	GO:0006936:biological_process:muscle contraction	GO:0007517:biological_process:muscle organ development	GO:0030239:biological_process:myofibril assembly	GO:0031033:biological_process:myosin filament organization	GO:0050821:biological_process:protein stabilization	GO:0045214:biological_process:sarcomere organization	GO:0030241:biological_process:skeletal muscle myosin thick filament assembly
Locus_26134.0|BlastHit|gi|110825729|sp|P05661.4|MYSA_DROME	8405	GO:0031672:cellular_component:A band	GO:0016459:cellular_component:myosin complex	GO:0032982:cellular_component:myosin filament	GO:0005703:cellular_component:polytene chromosome puff	GO:0030017:cellular_component:sarcomere	GO:0030898:molecular_function:actin-dependent ATPase activity	GO:0005524:molecular_function:ATP binding	GO:0042623:molecular_function:ATPase activity, coupled	GO:0003774:molecular_function:motor activity	GO:0042803:molecular_function:protein homodimerization activity	GO:0008307:molecular_function:structural constituent of muscle	GO:0007527:biological_process:adult somatic muscle development	GO:0006200:biological_process:ATP catabolic process	GO:0007298:biological_process:border follicle cell migration	GO:0007427:biological_process:epithelial cell migration, open tracheal system	GO:0060361:biological_process:flight	GO:0040011:biological_process:locomotion	GO:0042692:biological_process:muscle cell differentiation	GO:0006936:biological_process:muscle contraction	GO:0007517:biological_process:muscle organ development	GO:0030239:biological_process:myofibril assembly	GO:0031033:biological_process:myosin filament organization	GO:0050821:biological_process:protein stabilization	GO:0045214:biological_process:sarcomere organization	GO:0030241:biological_process:skeletal muscle myosin thick filament assembly
Locus_26134.0|BlastHit|gi|110825729|sp|P05661.4|MYSA_DROME	8406	GO:0031672:cellular_component:A band	GO:0016459:cellular_component:myosin complex	GO:0032982:cellular_component:myosin filament	GO:0005703:cellular_component:polytene chromosome puff	GO:0030017:cellular_component:sarcomere	GO:0030898:molecular_function:actin-dependent ATPase activity	GO:0005524:molecular_function:ATP binding	GO:0042623:molecular_function:ATPase activity, coupled	GO:0003774:molecular_function:motor activity	GO:0042803:molecular_function:protein homodimerization activity	GO:0008307:molecular_function:structural constituent of muscle	GO:0007527:biological_process:adult somatic muscle development	GO:0006200:biological_process:ATP catabolic process	GO:0007298:biological_process:border follicle cell migration	GO:0007427:biological_process:epithelial cell migration, open tracheal system	GO:0060361:biological_process:flight	GO:0040011:biological_process:locomotion	GO:0042692:biological_process:muscle cell differentiation	GO:0006936:biological_process:muscle contraction	GO:0007517:biological_process:muscle organ development	GO:0030239:biological_process:myofibril assembly	GO:0031033:biological_process:myosin filament organization	GO:0050821:biological_process:protein stabilization	GO:0045214:biological_process:sarcomere organization	GO:0030241:biological_process:skeletal muscle myosin thick filament assembly
Locus_26134.0|BlastHit|gi|110825729|sp|P05661.4|MYSA_DROME	8408	GO:0031672:cellular_component:A band	GO:0016459:cellular_component:myosin complex	GO:0032982:cellular_component:myosin filament	GO:0005703:cellular_component:polytene chromosome puff	GO:0030017:cellular_component:sarcomere	GO:0030898:molecular_function:actin-dependent ATPase activity	GO:0005524:molecular_function:ATP binding	GO:0042623:molecular_function:ATPase activity, coupled	GO:0003774:molecular_function:motor activity	GO:0042803:molecular_function:protein homodimerization activity	GO:0008307:molecular_function:structural constituent of muscle	GO:0007527:biological_process:adult somatic muscle development	GO:0006200:biological_process:ATP catabolic process	GO:0007298:biological_process:border follicle cell migration	GO:0007427:biological_process:epithelial cell migration, open tracheal system	GO:0060361:biological_process:flight	GO:0040011:biological_process:locomotion	GO:0042692:biological_process:muscle cell differentiation	GO:0006936:biological_process:muscle contraction	GO:0007517:biological_process:muscle organ development	GO:0030239:biological_process:myofibril assembly	GO:0031033:biological_process:myosin filament organization	GO:0050821:biological_process:protein stabilization	GO:0045214:biological_process:sarcomere organization	GO:0030241:biological_process:skeletal muscle myosin thick filament assembly
Locus_26134.0|BlastHit|gi|110825729|sp|P05661.4|MYSA_DROME	8409	GO:0031672:cellular_component:A band	GO:0016459:cellular_component:myosin complex	GO:0032982:cellular_component:myosin filament	GO:0005703:cellular_component:polytene chromosome puff	GO:0030017:cellular_component:sarcomere	GO:0030898:molecular_function:actin-dependent ATPase activity	GO:0005524:molecular_function:ATP binding	GO:0042623:molecular_function:ATPase activity, coupled	GO:0003774:molecular_function:motor activity	GO:0042803:molecular_function:protein homodimerization activity	GO:0008307:molecular_function:structural constituent of muscle	GO:0007527:biological_process:adult somatic muscle development	GO:0006200:biological_process:ATP catabolic process	GO:0007298:biological_process:border follicle cell migration	GO:0007427:biological_process:epithelial cell migration, open tracheal system	GO:0060361:biological_process:flight	GO:0040011:biological_process:locomotion	GO:0042692:biological_process:muscle cell differentiation	GO:0006936:biological_process:muscle contraction	GO:0007517:biological_process:muscle organ development	GO:0030239:biological_process:myofibril assembly	GO:0031033:biological_process:myosin filament organization	GO:0050821:biological_process:protein stabilization	GO:0045214:biological_process:sarcomere organization	GO:0030241:biological_process:skeletal muscle myosin thick filament assembly
Locus_26134.0|BlastHit|gi|110825729|sp|P05661.4|MYSA_DROME	8410	GO:0031672:cellular_component:A band	GO:0016459:cellular_component:myosin complex	GO:0032982:cellular_component:myosin filament	GO:0005703:cellular_component:polytene chromosome puff	GO:0030017:cellular_component:sarcomere	GO:0030898:molecular_function:actin-dependent ATPase activity	GO:0005524:molecular_function:ATP binding	GO:0042623:molecular_function:ATPase activity, coupled	GO:0003774:molecular_function:motor activity	GO:0042803:molecular_function:protein homodimerization activity	GO:0008307:molecular_function:structural constituent of muscle	GO:0007527:biological_process:adult somatic muscle development	GO:0006200:biological_process:ATP catabolic process	GO:0007298:biological_process:border follicle cell migration	GO:0007427:biological_process:epithelial cell migration, open tracheal system	GO:0060361:biological_process:flight	GO:0040011:biological_process:locomotion	GO:0042692:biological_process:muscle cell differentiation	GO:0006936:biological_process:muscle contraction	GO:0007517:biological_process:muscle organ development	GO:0030239:biological_process:myofibril assembly	GO:0031033:biological_process:myosin filament organization	GO:0050821:biological_process:protein stabilization	GO:0045214:biological_process:sarcomere organization	GO:0030241:biological_process:skeletal muscle myosin thick filament assembly
Locus_26134.0|BlastHit|gi|110825729|sp|P05661.4|MYSA_DROME	8412	GO:0031672:cellular_component:A band	GO:0016459:cellular_component:myosin complex	GO:0032982:cellular_component:myosin filament	GO:0005703:cellular_component:polytene chromosome puff	GO:0030017:cellular_component:sarcomere	GO:0030898:molecular_function:actin-dependent ATPase activity	GO:0005524:molecular_function:ATP binding	GO:0042623:molecular_function:ATPase activity, coupled	GO:0003774:molecular_function:motor activity	GO:0042803:molecular_function:protein homodimerization activity	GO:0008307:molecular_function:structural constituent of muscle	GO:0007527:biological_process:adult somatic muscle development	GO:0006200:biological_process:ATP catabolic process	GO:0007298:biological_process:border follicle cell migration	GO:0007427:biological_process:epithelial cell migration, open tracheal system	GO:0060361:biological_process:flight	GO:0040011:biological_process:locomotion	GO:0042692:biological_process:muscle cell differentiation	GO:0006936:biological_process:muscle contraction	GO:0007517:biological_process:muscle organ development	GO:0030239:biological_process:myofibril assembly	GO:0031033:biological_process:myosin filament organization	GO:0050821:biological_process:protein stabilization	GO:0045214:biological_process:sarcomere organization	GO:0030241:biological_process:skeletal muscle myosin thick filament assembly
Locus_26146.0|BlastHit|gi|143811452|sp|Q13905.3|RPGF1_HUMAN	8422	GO:0005829:cellular_component:cytosol	GO:0005769:cellular_component:early endosome	GO:0005768:cellular_component:endosome	GO:0017034:molecular_function:Rap guanyl-nucleotide exchange factor activity	GO:0000186:biological_process:activation of MAPKK activity	GO:0001568:biological_process:blood vessel development	GO:0071320:biological_process:cellular response to cAMP	GO:1990090:biological_process:cellular response to nerve growth factor stimulus	GO:0061028:biological_process:establishment of endothelial barrier	GO:0090090:biological_process:negative regulation of canonical Wnt signaling pathway	GO:0070373:biological_process:negative regulation of ERK1 and ERK2 cascade	GO:2000178:biological_process:negative regulation of neural precursor cell proliferation	GO:0051898:biological_process:negative regulation of protein kinase B signaling	GO:0046580:biological_process:negative regulation of Ras protein signal transduction	GO:0038180:biological_process:nerve growth factor signaling pathway	GO:0048011:biological_process:neurotrophin TRK receptor signaling pathway	GO:0048008:biological_process:platelet-derived growth factor receptor signaling pathway	GO:0010976:biological_process:positive regulation of neuron projection development	GO:0032854:biological_process:positive regulation of Rap GTPase activity	GO:0032486:biological_process:Rap protein signal transduction	GO:1901888:biological_process:regulation of cell junction assembly	GO:0007165:biological_process:signal transduction	GO:0016337:biological_process:single organismal cell-cell adhesion	GO:0007169:biological_process:transmembrane receptor protein tyrosine kinase signaling pathway
Locus_26151.0|BlastHit|gi|68847034|sp|Q8NDH3.3|PEPL1_HUMAN	8429	GO:0005737:cellular_component:cytoplasm	GO:0005634:cellular_component:nucleus	GO:0004177:molecular_function:aminopeptidase activity	GO:0030145:molecular_function:manganese ion binding	GO:0008235:molecular_function:metalloexopeptidase activity
Locus_26162.0|BlastHit|gi|3915117|sp|P97615.1|THIOM_RAT	8437	GO:0016021:cellular_component:integral component of membrane
Locus_26162.0|BlastHit|gi|3915117|sp|P97615.1|THIOM_RAT	8437	GO:0005739:cellular_component:mitochondrion	GO:0005730:cellular_component:nucleolus	GO:0015035:molecular_function:protein disulfide oxidoreductase activity	GO:0045454:biological_process:cell redox homeostasis	GO:0006662:biological_process:glycerol ether metabolic process
Locus_26163.0|BlastHit|gi|122145742|sp|Q17QH8.1|D39U1_BOVIN	8438	GO:0016491:molecular_function:oxidoreductase activity
Locus_26172.0|BlastHit|gi|6015048|sp|O46629.1|ECHB_BOVIN	8449	GO:0005783:cellular_component:endoplasmic reticulum	GO:0070062:cellular_component:extracellular vesicular exosome	GO:0005743:cellular_component:mitochondrial inner membrane	GO:0042645:cellular_component:mitochondrial nucleoid	GO:0005741:cellular_component:mitochondrial outer membrane	GO:0003988:molecular_function:acetyl-CoA C-acyltransferase activity	GO:0016509:molecular_function:long-chain-3-hydroxyacyl-CoA dehydrogenase activity	GO:0044822:molecular_function:poly(A) RNA binding	GO:0006635:biological_process:fatty acid beta-oxidation
Locus_26193.0|BlastHit|gi|223590061|sp|Q29IK4.2|RM22_DROPS	8461	GO:0015934:cellular_component:large ribosomal subunit	GO:0005739:cellular_component:mitochondrion	GO:0003735:molecular_function:structural constituent of ribosome	GO:0006412:biological_process:translation
Locus_26194.0|BlastHit|gi|82177029|sp|Q803E1.1|CQ085_DANRE	8462	GO:0000166:molecular_function:nucleotide binding
Locus_26213.0|BlastHit|gi|27923984|sp|P18932.4|NU5M_DROME	8478	GO:0016021:cellular_component:integral component of membrane	GO:0005743:cellular_component:mitochondrial inner membrane	GO:0045263:cellular_component:proton-transporting ATP synthase complex, coupling factor F(o)	GO:0015078:molecular_function:hydrogen ion transmembrane transporter activity	GO:0015986:biological_process:ATP synthesis coupled proton transport
Locus_26213.0|BlastHit|gi|27923984|sp|P18932.4|NU5M_DROME	8478	GO:0016021:cellular_component:integral component of membrane	GO:0005743:cellular_component:mitochondrial inner membrane	GO:0070469:cellular_component:respiratory chain	GO:0008137:molecular_function:NADH dehydrogenase (ubiquinone) activity	GO:0042773:biological_process:ATP synthesis coupled electron transport
Locus_26213.0|BlastHit|gi|27923984|sp|P18932.4|NU5M_DROME	8478	GO:0016021:cellular_component:integral component of membrane	GO:0005743:cellular_component:mitochondrial inner membrane	GO:0070469:cellular_component:respiratory chain	GO:0008137:molecular_function:NADH dehydrogenase (ubiquinone) activity	GO:0042773:biological_process:ATP synthesis coupled electron transport
Locus_26213.0|BlastHit|gi|27923984|sp|P18932.4|NU5M_DROME	8478	GO:0016021:cellular_component:integral component of membrane	GO:0005743:cellular_component:mitochondrial inner membrane	GO:0070469:cellular_component:respiratory chain	GO:0008137:molecular_function:NADH dehydrogenase (ubiquinone) activity	GO:0042773:biological_process:ATP synthesis coupled electron transport
Locus_26213.0|BlastHit|gi|27923984|sp|P18932.4|NU5M_DROME	8478	GO:0016021:cellular_component:integral component of membrane	GO:0031966:cellular_component:mitochondrial membrane	GO:0070469:cellular_component:respiratory chain	GO:0008137:molecular_function:NADH dehydrogenase (ubiquinone) activity
Locus_26213.0|BlastHit|gi|27923984|sp|P18932.4|NU5M_DROME	8478	GO:0016021:cellular_component:integral component of membrane	GO:0031966:cellular_component:mitochondrial membrane	GO:0070469:cellular_component:respiratory chain	GO:0008137:molecular_function:NADH dehydrogenase (ubiquinone) activity
Locus_26214.0|BlastHit|gi|82232120|sp|Q5M8L0.1|OTU6B_XENTR	8479	GO:0008234:molecular_function:cysteine-type peptidase activity
Locus_26220.1|BlastHit|gi|82117610|sp|Q9PTU6.1|ENDOU_PAROL	8483	GO:0005576:cellular_component:extracellular region	GO:0004521:molecular_function:endoribonuclease activity	GO:0046872:molecular_function:metal ion binding	GO:0030247:molecular_function:polysaccharide binding	GO:0003723:molecular_function:RNA binding	GO:0005044:molecular_function:scavenger receptor activity	GO:0006955:biological_process:immune response	GO:0090502:biological_process:RNA phosphodiester bond hydrolysis, endonucleolytic
Locus_26222.0|BlastHit|gi|338817662|sp|C0KJQ4.2|ALPS_PORTR	8484	GO:0005576:cellular_component:extracellular region	GO:0042742:biological_process:defense response to bacterium
Locus_26228.0|BlastHit|gi|31340424|sp|Q8WTC1.2|RT15_DROME	8488	GO:0005763:cellular_component:mitochondrial small ribosomal subunit	GO:0005739:cellular_component:mitochondrion	GO:0003735:molecular_function:structural constituent of ribosome	GO:0040008:biological_process:regulation of growth	GO:0006412:biological_process:translation
Locus_26233.0|BlastHit|gi|81904744|sp|Q9D1I6.1|RM14_MOUSE	8489	GO:0005739:cellular_component:mitochondrion	GO:0005840:cellular_component:ribosome	GO:0044822:molecular_function:poly(A) RNA binding	GO:0003735:molecular_function:structural constituent of ribosome	GO:0006412:biological_process:translation
Locus_26237.0|BlastHit|gi|74734348|sp|Q9NUJ3.1|T11L1_HUMAN	8491	GO:0005874:cellular_component:microtubule
Locus_26245.0|BlastHit|gi|67461064|sp|Q90744.1|NAGAB_CHICK	8517	GO:0005764:cellular_component:lysosome	GO:0008456:molecular_function:alpha-N-acetylgalactosaminidase activity	GO:0005975:biological_process:carbohydrate metabolic process
Locus_26252.0|BlastHit|gi|61252765|sp|Q9Y5W5.3|WIF1_HUMAN	8522	GO:0005576:cellular_component:extracellular region	GO:0007275:biological_process:multicellular organismal development	GO:0016055:biological_process:Wnt signaling pathway
Locus_26255.0|BlastHit|gi|115881|sp|P04069.1|CBPB_ASTFL	8523	GO:0005576:cellular_component:extracellular region	GO:0004181:molecular_function:metallocarboxypeptidase activity	GO:0008270:molecular_function:zinc ion binding
Locus_26265.0|BlastHit|gi|74752415|sp|Q9BX10.1|GTPB2_HUMAN	8526	GO:0043231:cellular_component:intracellular membrane-bounded organelle	GO:0005525:molecular_function:GTP binding	GO:0003924:molecular_function:GTPase activity
Locus_26275.0|BlastHit|gi|18203123|sp|Q9JJ80.2|RPF2_MOUSE	8534	GO:0005730:cellular_component:nucleolus
Locus_26280.0|BlastHit|gi|82200144|sp|Q6DEB1.1|AT2L1_XENLA	8537	GO:0005739:cellular_component:mitochondrion	GO:0050459:molecular_function:ethanolamine-phosphate phospho-lyase activity	GO:0030170:molecular_function:pyridoxal phosphate binding	GO:0008483:molecular_function:transaminase activity
Locus_26283.1|BlastHit|gi|296434410|sp|Q7Z569.2|BRAP_HUMAN	8538	GO:0005737:cellular_component:cytoplasm	GO:0031965:cellular_component:nuclear membrane	GO:0000151:cellular_component:ubiquitin ligase complex	GO:0016874:molecular_function:ligase activity	GO:0008139:molecular_function:nuclear localization sequence binding	GO:0000166:molecular_function:nucleotide binding	GO:0004842:molecular_function:ubiquitin-protein transferase activity	GO:0008270:molecular_function:zinc ion binding	GO:0000165:biological_process:MAPK cascade	GO:0009968:biological_process:negative regulation of signal transduction	GO:0016567:biological_process:protein ubiquitination	GO:0007265:biological_process:Ras protein signal transduction
Locus_26284.0|BlastHit|gi|129330|sp|P23636.1|PP2A2_SCHPO	8539	GO:0005737:cellular_component:cytoplasm	GO:0005829:cellular_component:cytosol	GO:0005634:cellular_component:nucleus	GO:0046872:molecular_function:metal ion binding	GO:0004721:molecular_function:phosphoprotein phosphatase activity	GO:0007067:biological_process:mitotic nuclear division	GO:0010972:biological_process:negative regulation of G2/M transition of mitotic cell cycle	GO:0045930:biological_process:negative regulation of mitotic cell cycle	GO:0006470:biological_process:protein dephosphorylation	GO:0007165:biological_process:signal transduction
Locus_26285.1|BlastHit|gi|62901525|sp|Q94900.2|GLUCL_DROME	8541	GO:0030054:cellular_component:cell junction	GO:0034707:cellular_component:chloride channel complex	GO:0016021:cellular_component:integral component of membrane	GO:0005886:cellular_component:plasma membrane	GO:0045211:cellular_component:postsynaptic membrane	GO:0008068:molecular_function:extracellular-glutamate-gated chloride channel activity	GO:1902476:biological_process:chloride transmembrane transport	GO:0006821:biological_process:chloride transport	GO:0048812:biological_process:neuron projection morphogenesis
Locus_26296.0|BlastHit|gi|62510511|sp|Q9D1L0.1|CHCH2_MOUSE	8555	GO:0005739:cellular_component:mitochondrion
Locus_26313.1|BlastHit|gi|123884388|sp|Q08CA1.1|VTC2_DANRE	8589	GO:0005737:cellular_component:cytoplasm	GO:0080048:molecular_function:GDP-D-glucose phosphorylase activity	GO:0005085:molecular_function:guanyl-nucleotide exchange factor activity	GO:0016787:molecular_function:hydrolase activity	GO:0000166:molecular_function:nucleotide binding	GO:0016779:molecular_function:nucleotidyltransferase activity	GO:0006006:biological_process:glucose metabolic process
Locus_26314.0|BlastHit|gi|12230002|sp|Q9VCA5.1|SYFB_DROME	8590	GO:0005737:cellular_component:cytoplasm	GO:0005524:molecular_function:ATP binding	GO:0000287:molecular_function:magnesium ion binding	GO:0004826:molecular_function:phenylalanine-tRNA ligase activity	GO:0003723:molecular_function:RNA binding	GO:0006432:biological_process:phenylalanyl-tRNA aminoacylation
Locus_26319.0|BlastHit|gi|74737109|sp|Q6P161.1|RM54_HUMAN	8594	GO:0005739:cellular_component:mitochondrion	GO:0005840:cellular_component:ribosome	GO:0044822:molecular_function:poly(A) RNA binding
Locus_26327.0|BlastHit|gi|62286929|sp|Q80TG9.2|LRFN2_MOUSE	8601	GO:0005576:cellular_component:extracellular region
Locus_26332.0|BlastHit|gi|82188721|sp|Q7ZVX6.1|UBA3_DANRE	8604	GO:0005829:cellular_component:cytosol	GO:0005634:cellular_component:nucleus	GO:0016881:molecular_function:acid-amino acid ligase activity	GO:0005524:molecular_function:ATP binding	GO:0019781:molecular_function:NEDD8 activating enzyme activity	GO:0045116:biological_process:protein neddylation
Locus_26337.0|BlastHit|gi|13959708|sp|O42130.2|TOP2A_CHICK	8609	GO:0005634:cellular_component:nucleus	GO:0005524:molecular_function:ATP binding	GO:0008301:molecular_function:DNA binding, bending	GO:0003918:molecular_function:DNA topoisomerase type II (ATP-hydrolyzing) activity	GO:0000287:molecular_function:magnesium ion binding	GO:0006200:biological_process:ATP catabolic process	GO:0006265:biological_process:DNA topological change
Locus_26343.0|BlastHit|gi|160358765|sp|Q5RCG1.2|TM192_PONAB	8614	GO:0016021:cellular_component:integral component of membrane	GO:0005770:cellular_component:late endosome	GO:0005765:cellular_component:lysosomal membrane
Locus_26351.0|BlastHit|gi|23396498|sp|Q96KP4.2|CNDP2_HUMAN	8618	GO:0005829:cellular_component:cytosol	GO:0070062:cellular_component:extracellular vesicular exosome	GO:0004180:molecular_function:carboxypeptidase activity	GO:0016805:molecular_function:dipeptidase activity	GO:0046872:molecular_function:metal ion binding	GO:0008237:molecular_function:metallopeptidase activity	GO:0008233:molecular_function:peptidase activity	GO:0034701:molecular_function:tripeptidase activity	GO:0006508:biological_process:proteolysis
Locus_26353.0|BlastHit|gi|20455281|sp|O00560.1|SDCB1_HUMAN	8619	GO:0005912:cellular_component:adherens junction	GO:0072562:cellular_component:blood microparticle	GO:0005737:cellular_component:cytoplasm	GO:0005856:cellular_component:cytoskeleton	GO:0005829:cellular_component:cytosol	GO:0005789:cellular_component:endoplasmic reticulum membrane	GO:0005615:cellular_component:extracellular space	GO:0070062:cellular_component:extracellular vesicular exosome	GO:0005925:cellular_component:focal adhesion	GO:0005895:cellular_component:interleukin-5 receptor complex	GO:0042470:cellular_component:melanosome	GO:0016020:cellular_component:membrane	GO:0005634:cellular_component:nucleus	GO:0005886:cellular_component:plasma membrane	GO:0031982:cellular_component:vesicle	GO:0008093:molecular_function:cytoskeletal adaptor activity	GO:0005109:molecular_function:frizzled binding	GO:0042802:molecular_function:identical protein binding	GO:0005137:molecular_function:interleukin-5 receptor binding	GO:0046982:molecular_function:protein heterodimerization activity	GO:0047485:molecular_function:protein N-terminus binding	GO:0045545:molecular_function:syndecan binding	GO:0030036:biological_process:actin cytoskeleton organization	GO:0007411:biological_process:axon guidance	GO:0035556:biological_process:intracellular signal transduction	GO:1903543:biological_process:positive regulation of exosomal secretion	GO:1903553:biological_process:positive regulation of extracellular vesicular exosome assembly	GO:0046330:biological_process:positive regulation of JNK cascade	GO:0042327:biological_process:positive regulation of phosphorylation	GO:0006612:biological_process:protein targeting to membrane	GO:0007265:biological_process:Ras protein signal transduction	GO:0006930:biological_process:substrate-dependent cell migration, cell extension
Locus_26366.0|BlastHit|gi|1730035|sp|Q03958.1|PFD6_MOUSE	8642	GO:0005634:cellular_component:nucleus	GO:0016272:cellular_component:prefoldin complex	GO:0051131:biological_process:chaperone-mediated protein complex assembly	GO:0006457:biological_process:protein folding
Locus_26368.0|BlastHit|gi|75075258|sp|Q4R367.1|UFL1_MACFA	8645	GO:0005737:cellular_component:cytoplasm	GO:0005783:cellular_component:endoplasmic reticulum	GO:0071568:molecular_function:UFM1 transferase activity	GO:0032088:biological_process:negative regulation of NF-kappaB transcription factor activity	GO:0031397:biological_process:negative regulation of protein ubiquitination	GO:0071569:biological_process:protein ufmylation
Locus_26384.0|BlastHit|gi|62510647|sp|Q8HXY0.1|ETFA_MACFA	8670	GO:0005759:cellular_component:mitochondrial matrix	GO:0009055:molecular_function:electron carrier activity	GO:0050660:molecular_function:flavin adenine dinucleotide binding	GO:0055114:biological_process:oxidation-reduction process
Locus_26401.0|BlastHit|gi|24418661|sp|O00471.1|EXOC5_HUMAN	8682	GO:0005737:cellular_component:cytoplasm	GO:0005829:cellular_component:cytosol	GO:0044267:biological_process:cellular protein metabolic process	GO:0006887:biological_process:exocytosis	GO:0061024:biological_process:membrane organization	GO:0006892:biological_process:post-Golgi vesicle-mediated transport	GO:0015031:biological_process:protein transport	GO:0048278:biological_process:vesicle docking
Locus_26404.0|BlastHit|gi|68565154|sp|Q5ZJH7.1|CNPD1_CHICK	8685	GO:0016021:cellular_component:integral component of membrane	GO:0000079:biological_process:regulation of cyclin-dependent protein serine/threonine kinase activity
Locus_26409.0|BlastHit|gi|82185993|sp|Q6NYU7.1|UPP_DANRE	8693	GO:0005737:cellular_component:cytoplasm	GO:0005634:cellular_component:nucleus
Locus_26414.0|BlastHit|gi|78099250|sp|Q5ZLF0.1|F10A1_CHICK	8695	GO:0005737:cellular_component:cytoplasm
Locus_26424.0|BlastHit|gi|12643402|sp|Q92506.2|DHB8_HUMAN	8708	GO:0005740:cellular_component:mitochondrial envelope	GO:0005759:cellular_component:mitochondrial matrix	GO:0005886:cellular_component:plasma membrane	GO:0003857:molecular_function:3-hydroxyacyl-CoA dehydrogenase activity	GO:0004303:molecular_function:estradiol 17-beta-dehydrogenase activity	GO:0047035:molecular_function:testosterone dehydrogenase (NAD+) activity	GO:0008209:biological_process:androgen metabolic process	GO:0006703:biological_process:estrogen biosynthetic process	GO:0006633:biological_process:fatty acid biosynthetic process
Locus_26431.0|BlastHit|gi|17375506|sp|Q15054.2|DPOD3_HUMAN	8709	GO:0043625:cellular_component:delta DNA polymerase complex	GO:0005739:cellular_component:mitochondrion	GO:0005654:cellular_component:nucleoplasm	GO:0005634:cellular_component:nucleus	GO:0003887:molecular_function:DNA-directed DNA polymerase activity	GO:0006284:biological_process:base-excision repair	GO:0006281:biological_process:DNA repair	GO:0006271:biological_process:DNA strand elongation involved in DNA replication	GO:0000731:biological_process:DNA synthesis involved in DNA repair	GO:0006298:biological_process:mismatch repair	GO:0000278:biological_process:mitotic cell cycle	GO:0006289:biological_process:nucleotide-excision repair	GO:0006297:biological_process:nucleotide-excision repair, DNA gap filling	GO:0000723:biological_process:telomere maintenance	GO:0000722:biological_process:telomere maintenance via recombination	GO:0032201:biological_process:telomere maintenance via semi-conservative replication	GO:0006283:biological_process:transcription-coupled nucleotide-excision repair
Locus_26447.0|BlastHit|gi|158564000|sp|Q9UHW5.2|GPN3_HUMAN	8723	GO:0043234:cellular_component:protein complex	GO:0005525:molecular_function:GTP binding
Locus_26460.0|BlastHit|gi|110288002|sp|Q2TA03.1|UB2J2_BOVIN	8729	GO:0005789:cellular_component:endoplasmic reticulum membrane	GO:0016021:cellular_component:integral component of membrane	GO:0016881:molecular_function:acid-amino acid ligase activity	GO:0005524:molecular_function:ATP binding	GO:0016567:biological_process:protein ubiquitination	GO:0006986:biological_process:response to unfolded protein
Locus_26466.0|BlastHit|gi|74731506|sp|Q96DX4.1|RSPRY_HUMAN	8736	GO:0005576:cellular_component:extracellular region	GO:0008270:molecular_function:zinc ion binding
Locus_26468.0|BlastHit|gi|82178883|sp|Q5EAR6.1|CC115_DANRE	8737	GO:0005768:cellular_component:endosome	GO:0005764:cellular_component:lysosome
Locus_26479.1|BlastHit|gi|73920458|sp|Q6NWF4.2|VPS25_DANRE	8746	GO:0005737:cellular_component:cytoplasm	GO:0015031:biological_process:protein transport
Locus_26482.0|BlastHit|gi|73622264|sp|P14576.2|SRP54_MOUSE	8748	GO:0016607:cellular_component:nuclear speck	GO:0005786:cellular_component:signal recognition particle, endoplasmic reticulum targeting	GO:0008312:molecular_function:7S RNA binding	GO:0005525:molecular_function:GTP binding	GO:0003924:molecular_function:GTPase activity	GO:0006614:biological_process:SRP-dependent cotranslational protein targeting to membrane
Locus_26483.0|BlastHit|gi|88941977|sp|Q2YDF6.1|RT35_BOVIN	8749	GO:0005763:cellular_component:mitochondrial small ribosomal subunit	GO:0044822:molecular_function:poly(A) RNA binding
Locus_26490.0|BlastHit|gi|82184315|sp|Q6GNX5.1|TM203_XENLA	8752	GO:0016021:cellular_component:integral component of membrane
Locus_26490.0|BlastHit|gi|82184315|sp|Q6GNX5.1|TM203_XENLA	8752	GO:0005737:cellular_component:cytoplasm	GO:0005730:cellular_component:nucleolus	GO:0044822:molecular_function:poly(A) RNA binding	GO:0004526:molecular_function:ribonuclease P activity	GO:0008033:biological_process:tRNA processing
Locus_26492.0|BlastHit|gi|74733232|sp|Q9BUL8.1|PDC10_HUMAN	8754	GO:0005829:cellular_component:cytosol	GO:0070062:cellular_component:extracellular vesicular exosome	GO:0000139:cellular_component:Golgi membrane	GO:0005886:cellular_component:plasma membrane	GO:0001525:biological_process:angiogenesis	GO:0006915:biological_process:apoptotic process	GO:0043066:biological_process:negative regulation of apoptotic process	GO:0008284:biological_process:positive regulation of cell proliferation	GO:0043406:biological_process:positive regulation of MAP kinase activity
Locus_26507.0|BlastHit|gi|21431847|sp|Q15050.2|RRS1_HUMAN	8768	GO:0000794:cellular_component:condensed nuclear chromosome	GO:0005783:cellular_component:endoplasmic reticulum	GO:0005730:cellular_component:nucleolus	GO:0005634:cellular_component:nucleus	GO:0044822:molecular_function:poly(A) RNA binding	GO:0002244:biological_process:hematopoietic progenitor cell differentiation	GO:0007080:biological_process:mitotic metaphase plate congression	GO:0042254:biological_process:ribosome biogenesis
Locus_26512.0|BlastHit|gi|22653707|sp|Q9CQ36.1|DPOE4_MOUSE	8773	GO:0005671:cellular_component:Ada2/Gcn5/Ada3 transcription activator complex	GO:0008622:cellular_component:epsilon DNA polymerase complex	GO:0003887:molecular_function:DNA-directed DNA polymerase activity	GO:0043565:molecular_function:sequence-specific DNA binding	GO:0043966:biological_process:histone H3 acetylation
Locus_26521.0|BlastHit|gi|341940721|sp|P35576.2|G6PC_MOUSE	8780	GO:0005783:cellular_component:endoplasmic reticulum	GO:0005789:cellular_component:endoplasmic reticulum membrane	GO:0016021:cellular_component:integral component of membrane	GO:0016787:molecular_function:hydrolase activity	GO:0006094:biological_process:gluconeogenesis	GO:0042593:biological_process:glucose homeostasis	GO:0050796:biological_process:regulation of insulin secretion
Locus_26522.0|BlastHit|gi|296452924|sp|Q9BTW9.2|TBCD_HUMAN	8781	GO:0005912:cellular_component:adherens junction	GO:0005737:cellular_component:cytoplasm	GO:0016328:cellular_component:lateral plasma membrane	GO:0005923:cellular_component:tight junction	GO:0048487:molecular_function:beta-tubulin binding	GO:0005096:molecular_function:GTPase activator activity	GO:0034333:biological_process:adherens junction assembly	GO:0010812:biological_process:negative regulation of cell-substrate adhesion	GO:0031115:biological_process:negative regulation of microtubule polymerization	GO:0043547:biological_process:positive regulation of GTPase activity	GO:0007023:biological_process:post-chaperonin tubulin folding pathway	GO:0006457:biological_process:protein folding	GO:0070830:biological_process:tight junction assembly
Locus_26522.0|BlastHit|gi|296452924|sp|Q9BTW9.2|TBCD_HUMAN	8781	GO:0005912:cellular_component:adherens junction	GO:0005737:cellular_component:cytoplasm	GO:0016328:cellular_component:lateral plasma membrane	GO:0005874:cellular_component:microtubule	GO:0005923:cellular_component:tight junction	GO:0048487:molecular_function:beta-tubulin binding	GO:0051087:molecular_function:chaperone binding	GO:0005096:molecular_function:GTPase activator activity	GO:0051084:biological_process:'de novo' posttranslational protein folding	GO:0034333:biological_process:adherens junction assembly	GO:0044267:biological_process:cellular protein metabolic process	GO:0010812:biological_process:negative regulation of cell-substrate adhesion	GO:0031115:biological_process:negative regulation of microtubule polymerization	GO:0043547:biological_process:positive regulation of GTPase activity	GO:0007023:biological_process:post-chaperonin tubulin folding pathway	GO:0006457:biological_process:protein folding	GO:0070830:biological_process:tight junction assembly
Locus_26524.0|BlastHit|gi|68565605|sp|Q96I82.1|KAZD1_HUMAN	8783	GO:0005576:cellular_component:extracellular region	GO:0004867:molecular_function:serine-type endopeptidase inhibitor activity	GO:0001558:biological_process:regulation of cell growth
Locus_26528.0|BlastHit|gi|123892602|sp|Q28DR7.1|DCTN6_XENTR	8790	GO:0000777:cellular_component:condensed chromosome kinetochore	GO:0005737:cellular_component:cytoplasm	GO:0005869:cellular_component:dynactin complex
Locus_26537.0|BlastHit|gi|152125829|sp|Q5T013.2|HYI_HUMAN	8795	GO:0008903:molecular_function:hydroxypyruvate isomerase activity
Locus_26546.0|BlastHit|gi|29839593|sp|Q91W90.2|TXND5_MOUSE	8809	GO:0005788:cellular_component:endoplasmic reticulum lumen	GO:0003756:molecular_function:protein disulfide isomerase activity	GO:0043277:biological_process:apoptotic cell clearance	GO:0045454:biological_process:cell redox homeostasis	GO:0006457:biological_process:protein folding	GO:0034976:biological_process:response to endoplasmic reticulum stress
Locus_26558.0|BlastHit|gi|254763312|sp|Q9Z1P4.2|LGR5_MOUSE	8818	GO:0005576:cellular_component:extracellular region
Locus_26560.0|BlastHit|gi|74751821|sp|Q96DW6.1|S2538_HUMAN	8821	GO:0016021:cellular_component:integral component of membrane	GO:0005743:cellular_component:mitochondrial inner membrane	GO:0030218:biological_process:erythrocyte differentiation	GO:0006783:biological_process:heme biosynthetic process	GO:0006810:biological_process:transport
Locus_26566.0|BlastHit|gi|62510916|sp|Q60HE9.1|MA2B1_MACFA	8824	GO:0005764:cellular_component:lysosome	GO:0004559:molecular_function:alpha-mannosidase activity	GO:0030246:molecular_function:carbohydrate binding	GO:0008270:molecular_function:zinc ion binding	GO:0006013:biological_process:mannose metabolic process
Locus_26571.0|BlastHit|gi|2497623|sp|Q95028.1|LDH_DROME	8854	GO:0005737:cellular_component:cytoplasm	GO:0004459:molecular_function:L-lactate dehydrogenase activity	GO:0044262:biological_process:cellular carbohydrate metabolic process	GO:0007520:biological_process:myoblast fusion	GO:0007525:biological_process:somatic muscle development
Locus_26587.0|BlastHit|gi|296452908|sp|Q13435.2|SF3B2_HUMAN	8862	GO:0071013:cellular_component:catalytic step 2 spliceosome	GO:0005654:cellular_component:nucleoplasm	GO:0005634:cellular_component:nucleus	GO:0005681:cellular_component:spliceosomal complex	GO:0005689:cellular_component:U12-type spliceosomal complex	GO:0044822:molecular_function:poly(A) RNA binding	GO:0010467:biological_process:gene expression	GO:0006397:biological_process:mRNA processing	GO:0000398:biological_process:mRNA splicing, via spliceosome	GO:0008380:biological_process:RNA splicing	GO:0016032:biological_process:viral process
Locus_26611.0|BlastHit|gi|123885682|sp|Q0IHI6.1|MED30_XENLA	8884	GO:0005634:cellular_component:nucleus	GO:0006355:biological_process:regulation of transcription, DNA-templated	GO:0006351:biological_process:transcription, DNA-templated
Locus_26612.0|BlastHit|gi|206729942|sp|O15550.2|KDM6A_HUMAN	8885	GO:0035097:cellular_component:histone methyltransferase complex	GO:0005634:cellular_component:nucleus	GO:0051213:molecular_function:dioxygenase activity	GO:0071558:molecular_function:histone demethylase activity (H3-K27 specific)	GO:0042802:molecular_function:identical protein binding	GO:0046872:molecular_function:metal ion binding	GO:0000978:molecular_function:RNA polymerase II core promoter proximal region sequence-specific DNA binding	GO:0060070:biological_process:canonical Wnt signaling pathway	GO:0072358:biological_process:cardiovascular system development	GO:0048568:biological_process:embryonic organ development	GO:0007507:biological_process:heart development	GO:0003007:biological_process:heart morphogenesis	GO:0001701:biological_process:in utero embryonic development	GO:0048333:biological_process:mesodermal cell differentiation	GO:0035264:biological_process:multicellular organism growth	GO:0001843:biological_process:neural tube closure	GO:0021915:biological_process:neural tube development	GO:0048570:biological_process:notochord morphogenesis	GO:0010468:biological_process:regulation of gene expression	GO:0003016:biological_process:respiratory system process	GO:0032525:biological_process:somite rostral/caudal axis specification
Locus_26613.0|BlastHit|gi|313104226|sp|Q3SXM5.3|HSDL1_HUMAN	8886	GO:0005739:cellular_component:mitochondrion	GO:0016491:molecular_function:oxidoreductase activity
Locus_26626.0|BlastHit|gi|205686171|sp|P85971.1|6PGL_RAT	8896	GO:0005737:cellular_component:cytoplasm	GO:0070062:cellular_component:extracellular vesicular exosome	GO:0017057:molecular_function:6-phosphogluconolactonase activity	GO:0048029:molecular_function:monosaccharide binding	GO:0009051:biological_process:pentose-phosphate shunt, oxidative branch
Locus_26627.0|BlastHit|gi|74710634|sp|Q6ZN80.1|MGAL1_HUMAN	8897	GO:0016324:cellular_component:apical plasma membrane	GO:0070062:cellular_component:extracellular vesicular exosome	GO:0016021:cellular_component:integral component of membrane	GO:0005886:cellular_component:plasma membrane	GO:0004558:molecular_function:alpha-1,4-glucosidase activity	GO:0016160:molecular_function:amylase activity	GO:0030246:molecular_function:carbohydrate binding	GO:0003824:molecular_function:catalytic activity	GO:0004339:molecular_function:glucan 1,4-alpha-glucosidase activity	GO:0032450:molecular_function:maltose alpha-glucosidase activity	GO:0005975:biological_process:carbohydrate metabolic process	GO:0044245:biological_process:polysaccharide digestion	GO:0044281:biological_process:small molecule metabolic process	GO:0005983:biological_process:starch catabolic process
Locus_26628.0|BlastHit|gi|224487971|sp|B4KN00.1|EIF3C_DROMO	8898	GO:0016282:cellular_component:eukaryotic 43S preinitiation complex	GO:0033290:cellular_component:eukaryotic 48S preinitiation complex	GO:0005852:cellular_component:eukaryotic translation initiation factor 3 complex	GO:0003743:molecular_function:translation initiation factor activity	GO:0001731:biological_process:formation of translation preinitiation complex	GO:0006446:biological_process:regulation of translational initiation
[truncated: 1,157 more rows]
